# Supplementary material for: LncRNA mediated regulation of aging pathways in Drosophila melanogaster during dietary restriction
Source: publisher site journal article supplement (doi:10.18632/aging.101062), 2016-09-27
Supplement: Supplementary file 1 [file aging-v8i9-101062-supplementary-material-SD1.pdf]

## SUPPLEMENTARY MATERIAL

**Supplementary Table S1. Transcriptome profiles of DR and fully fed flies**

| Sample name       | Raw reads | Clean reads | Clean bases | Error rate (%) | Q20 (%) | Q30 (%) | GC content (%) |
|-------------------|-----------|-------------|-------------|----------------|---------|---------|----------------|
| DR_42d_1_1        | 46563239  | 44306160    | 5.54G       | 0.03           | 96.36   | 92.55   | 51.09          |
| DR_42d_1_2        | 46563239  | 44306160    | 5.54G       | 0.04           | 94.57   | 89.71   | 50.32          |
| DR_42d_2_1        | 45239902  | 43388011    | 5.42G       | 0.03           | 96.24   | 92.32   | 50.81          |
| DR_42d_2_2        | 45239902  | 43388011    | 5.42G       | 0.04           | 94.4    | 89.37   | 50             |
| DR_7d_1_1         | 44319390  | 42475291    | 5.31G       | 0.03           | 96.93   | 93.69   | 51.9           |
| DR_7d_1_2         | 44319390  | 42475291    | 5.31G       | 0.04           | 93.01   | 87.43   | 50.92          |
| DR_7d_2_1         | 43316530  | 41506696    | 5.19G       | 0.03           | 96.87   | 93.59   | 51.57          |
| DR_7d_2_2         | 43316530  | 41506696    | 5.19G       | 0.04           | 93.13   | 87.61   | 50.64          |
| Fully fed_42d_1_1 | 45976024  | 43999316    | 5.5G        | 0.03           | 96.21   | 92.21   | 52.06          |
| Fully fed_42d_1_2 | 45976024  | 43999316    | 5.5G        | 0.04           | 94.18   | 88.98   | 51.19          |
| Fully fed_42d_2_1 | 45648001  | 43880922    | 5.49G       | 0.03           | 96.4    | 92.59   | 50.84          |
| Fully fed_42d_2_2 | 45648001  | 43880922    | 5.49G       | 0.04           | 94.11   | 88.92   | 50.01          |
| Fully fed_7d_1_1  | 46944441  | 45018051    | 5.63G       | 0.03           | 96.89   | 93.59   | 51.94          |
| Fully fed_7d_1_2  | 46944441  | 45018051    | 5.63G       | 0.04           | 92.81   | 87.1    | 51             |
| Fully fed_7d_2_1  | 44797568  | 42951957    | 5.37G       | 0.03           | 96.83   | 93.46   | 51.92          |
| Fully fed_7d_2_2  | 44797568  | 42951957    | 5.37G       | 0.04           | 92.8    | 87.04   | 51.01          |

**Supplementary Table S2. RT-qPCR primers of 89 genes**

| Gene name | Gene name     | Primers(5'-3')       | Product size | Tm (°C) |
|-----------|---------------|----------------------|--------------|---------|
| Arr2      | FBgn0000121-F | GGCACCTGGAACCATTGAGA | 85           | 63.3    |
|           | FBgn0000121-R | ATAGCCCTTCACATTGCGGT |              |         |
| cp16      | FBgn0000356-R | CGTTATGGATGGGAGCAGGG | 157          | 63.3    |
|           | FBgn0000356-F | ACGCATTCTCGCCGTAAGAT |              |         |
| cp18      | FBgn0000357-F | AGCTCCTCTGGTCTGGAAGG | 88           | 63.3    |
|           | FBgn0000357-R | GTCCGTA CTCTGGTTCACG |              |         |
| cp19      | FBgn0000358-F | GAGCTACGGACAGCGATCTT | 182          | 63.3    |
|           | FBgn0000358-R | CATATCCACCGCTGACCTGG |              |         |
| ems       | FBgn0000576-F | AGCATCGAGTCCATTGTGGG | 146          | 63.3    |
|           | FBgn0000576-R | ATCAAGGTGAGTGTGGCTGG |              |         |
| hairy     | FBgn0001168-F | GGACATCAAGCCATCGGTCA | 89           | 63.3    |
|           | FBgn0001168-R | GCTCCTCCTCCTTGATCTGC |              |         |
| Cyp6w1    | FBgn0033065-F | ATCGTCCGGCACTTGTCATT | 93           | 63.3    |
|           | FBgn0033065-R | CAGTTTGAAGGACGCGTTG  |              |         |
| Gadd45    | FBgn0033153-F | CATCGGACGCACCATCAAGT | 126          | 63.3    |
|           | FBgn0033153-R | GCCATCAGGCAGAAGAGGG  |              |         |
| CG12374   | FBgn0033774-F | TCGTTGGTCCCTTGTTCCAC | 121          | 63.3    |
|           | FBgn0033774-R | GAATCGTCGCCAACAGAGGA |              |         |

|           |               |                         |     |      |
|-----------|---------------|-------------------------|-----|------|
| CG11192   | FBgn0034507-F | TTCGTTTCGTGGACGTGGAT    | 119 | 63.3 |
|           | FBgn0034507-R | CTGGCAACTATCCCCGACCTG   |     |      |
| IscU      | FBgn0037637-F | TGTCCCGGTGGCATTGTATC    | 137 | 63.3 |
|           | FBgn0037637-R | GTTTCATCACATCGCCGAG     |     |      |
| CG5999    | FBgn0038083-F | CACTTTGGAGGAGAAGCCGT    | 123 | 63.3 |
|           | FBgn0038083-R | GATTCCTAGCGGTCATCGG     |     |      |
| CG9743    | FBgn0039756-F | CTTCACCTGGACCCTCAACG    | 115 | 63.3 |
|           | FBgn0039756-R | CAGCAGGGAGACAATGGGAG    |     |      |
| CG9733    | FBgn0039759-F | CCAGTCAGATTCGAGGTGCC    | 86  | 63.3 |
|           | FBgn0039759-R | GCACGGAGTAGAGTGTCTGG    |     |      |
| Socs36E   | FBgn0041184-F | TTCGCTGAATGCAAATGGGC    | 139 | 61.4 |
|           | FBgn0041184-R | ACCGTTGTTATTCACGGGCT    |     |      |
| PGRP-SC2  | FBgn0043575-F | TTCTGGCCGTA CTCTTCTGC   | 145 | 63.3 |
|           | FBgn0043575-R | TAGTTTCCAGCGGTGTGGTG    |     |      |
| PGRP-SC1a | FBgn0043576-F | TCCAAAGTGGCTCTCCTCCT    | 71  | 63.3 |
|           | FBgn0043576-R | GAGACGACATAGACGCCCTG    |     |      |
| CG33970   | FBgn0053970-F | GGCATGTTGGAGCGTTGTTT    | 95  | 63.3 |
|           | FBgn0053970-R | GTCTGGCTTAGCATCACCGT    |     |      |
| Frq2      | FBgn0083228-F | TGGACAAGGGCTTTCTCAA     | 126 | 63.3 |
|           | FBgn0083228-R | GACACGAAAGACCAGGGAGG    |     |      |
| CG34384   | FBgn0085413-F | CGACCAGAAGATGCGGGAG     | 85  | 63.3 |
|           | FBgn0085413-R | CTTGAAGCTTTGACGCGCT     |     |      |
| nvd       | FBgn0259697-F | TGGGGAAGCAACTTGTGTGT    | 132 | 63.3 |
|           | FBgn0259697-R | GCAACGCTTCCACCAATACC    |     |      |
| CG13284   | FBgn0032614-F | GTAGGACTGCTCACCATCGG    | 99  | 63.3 |
|           | FBgn0032614-R | CAAGTGGGGCTGGAAGTAGG    |     |      |
| CG31810   | FBgn0051810-F | GAAAGACGAGCGAGACCAAC    | 82  | 63.3 |
|           | FBgn0051810-R | GTACGAATATCCATGGGAGCCAA |     |      |
| CG34383   | FBgn0085412-F | AAAATACGGGCAGCAGTGGA    | 84  | 63.3 |
|           | FBgn0085412-R | CGTTAATGCGTCTCGGCTTG    |     |      |
| al-AA     | FBgn0259733-F | GCTGGATCCCCTGGAACAT     | 71  | 63.3 |
|           | FBgn0259733-R | AGTCCTGTGCCTCTTTTGG     |     |      |
| Dip-B     | FBgn0000454-F | GGAAAGTGTATTGGCGAGGA    | 119 | 63.3 |
|           | FBgn0000454-R | CCGTGTTTGTCCAGTCCAGA    |     |      |
| Amy-d     | FBgn0000078-F | GCATCCGGTCGTAGTGGAAT    | 117 | 63.3 |
|           | FBgn0000078-R | CACAGGGGAGACCTGAACAC    |     |      |
| Gal       | FBgn0001089-F | CTCACCGTTGGCCTTTGTGT    | 70  | 63.3 |
|           | FBgn0001089-R | TCGTAAACCTTGGCTGTTCC    |     |      |
| Hsc70-1   | FBgn0001216-F | CAAGCAGCAGGA ACTGGAGA   | 137 | 63.3 |
|           | FBgn0001216-R | CCTCCTCAATGGTTGGACCC    |     |      |
| Hsc70-3   | FBgn0001218-F | GAAGTCGCAGGTGTTCTCCA    | 90  | 63.3 |
|           | FBgn0001218-R | TTGTCCTTGGTCATGGGACG    |     |      |
| Pepck     | FBgn0003067-F | CAGGGTCAATGGCGAATCCT    | 135 | 63.3 |
|           | FBgn0003067-R | GACCAGAACTCCTTGGGCAG    |     |      |
| Egfr      | FBgn0003731-F | CATCACCACAAGCTCATCGG    | 109 | 63.3 |
|           | FBgn0003731-R | ATGTTCTTGTGGAGGGCA      |     |      |

|                |               |                         |     |      |
|----------------|---------------|-------------------------|-----|------|
| Hsp70Bc        | FBgn0013279-F | TGCGATGACGAAGGACAACA    | 106 | 63.3 |
|                | FBgn0013279-R | GGCGTCCAAGTCGAAGGTTA    |     |      |
| Spat           | FBgn0014031-F | GCATCCGAAAGCGAAAGACC    | 106 | 63.3 |
|                | FBgn0014031-R | ATGGTGTGGTGGTAGATGCG    |     |      |
| CG8740         | FBgn0027585-F | GAAATCGGGAAGTGGCAGA     | 143 | 63.3 |
|                | FBgn0027585-R | GGTTTTCTCCATCCTGGGCA    |     |      |
| glob1          | FBgn0027657-F | GATTCTGGAGCGGCGATACT    | 85  | 63.3 |
|                | FBgn0027657-R | CCAAAGGAACATCGCGGAAG    |     |      |
| CG6048         | FBgn0029827-F | AACTTTTGGCGGTAGCCCTT    | 81  | 63.3 |
|                | FBgn0029827-R | TCGTGTCCAAGTGTGTTTCGT   |     |      |
| CG15046        | FBgn0030927-F | ACTGTCCGCTGTTCGAGATG    | 91  | 63.3 |
|                | FBgn0030927-R | CTGCCCAGATCCTGAACTCC    |     |      |
| Cyp28d2        | FBgn0031688-F | TGATGCTGGGACGTAATCCG    | 139 | 63.3 |
|                | FBgn0031688-R | TGCGGTGAAAACAAACGCAA    |     |      |
| SPH93          | FBgn0032638-F | GAGTTAGGCCGCGATACCTG    | 79  | 63.3 |
|                | FBgn0032638-R | ACACACCAGAGTTCTCCCCT    |     |      |
| CG17323        | FBgn0032713-F | GCAGCACATGAACTTTGGGG    | 90  | 63.3 |
|                | FBgn0032713-R | GCAGCGGGAACCGATAGTAA    |     |      |
| CR31781        | FBgn0051781-F | GGATACTCTGCCTCGCTCAC    | 88  | 59.4 |
|                | FBgn0051781-R | ACTCACAGACTTTCTGCCCG    |     |      |
| Cg25C          | FBgn0000299-F | GGACGGGTTACTCCCTGTTG    | 147 | 59.2 |
|                | FBgn0000299-R | TTCTGGAGGCGTAGTTGCAG    |     |      |
| $\alpha$ Try   | FBgn0003863-F | TGCGCTTACTCCAACCTACCC   | 70  | 60.4 |
|                | FBgn0003863-R | CAGTGCTCACCACCCAAGAG    |     |      |
| 5-HT1A         | FBgn0004168-F | TCTCCAGCCCTCCAACCTGAT   | 94  | 59.2 |
|                | FBgn0004168-R | CGAGGAGGAGCGTGTCATTT    |     |      |
| inaC           | FBgn0004784-F | TTTACGCTGTGGAAGTGGCT    | 112 | 59.4 |
|                | FBgn0004784-R | AGCTTTACATGCCCTCACC     |     |      |
| ash1           | FBgn0005386-F | AGTCAGCCACCAGTTTAGC     | 108 | 59.4 |
|                | FBgn0005386-R | TTGGGGGTTTCTTGTTGCT     |     |      |
| $\delta$ Try   | FBgn0010358-F | GGATGGGGCACTCTCTCCTA    | 84  | 58.3 |
|                | FBgn0010358-R | CTGGCTCTGGCTAACGATGT    |     |      |
| $\epsilon$ Try | FBgn0010425-F | CGCTCGGATGAGTTCGGATA    | 149 | 59.4 |
|                | FBgn0010425-R | CATCCATAGCCCCAGGACAC    |     |      |
| $\eta$ Try     | FBgn0011554-F | AGAGAACGGCTTGTTCATCCG   | 136 | 59.2 |
|                | FBgn0011554-R | CTTTCCGCCCTCCGATAGTC    |     |      |
| $\theta$ Try   | FBgn0011555-F | GGTCGGTAACACTCTGGTGG    | 71  | 59.2 |
|                | FBgn0011555-R | AAACACCGGGCAGTAGGTTT    |     |      |
| $\zeta$ Try    | FBgn0011556-F | ACCCAAGGTCTTCCCCTTCT    | 118 | 59.2 |
|                | FBgn0011556-R | TGTAGCGCAGGGAAATCTGG    |     |      |
| Zyx            | FBgn0011642-F | CGTTAATGAACTGACAACGAAAA | 104 | 59.2 |
|                | FBgn0011642-R | ATCCAAAGTGGCGTGACGA     |     |      |
| $\iota$ Try    | FBgn0015001-F | GTTTGATTCCCGCTTCCTGC    | 78  | 57   |
|                | FBgn0015001-R | CTCGTTGAGAGGCCAAAGGT    |     |      |
| vkg            | FBgn0016075-F | AGGCATCTCTCGGGTCTTCT    | 124 | 60.4 |
|                | FBgn0016075-R | CCATGCGTCCCTTGATTCT     |     |      |
| Ugt35b         | FBgn0026314-F | CAGAAACCCTTTTGCCACCG    | 79  | 60.4 |
|                | FBgn0026314-R | CCATAGTAGGCATCCGAGCG    |     |      |

|          |                      |                           |     |      |
|----------|----------------------|---------------------------|-----|------|
| GstE12   | FBgn0027590-F        | TATGCCACCCTAAGTCCCCC      | 91  | 59.2 |
|          | FBgn0027590-R        | TCAGCAGGTTAATTGGCCGT      |     |      |
| CG9220   | FBgn0030662-F        | ACCCTGCACTTGGAACACTACG    | 77  | 56.3 |
|          | FBgn0030662-R        | GTTTGCCCGTGTACGCATTT      |     |      |
| CG8974   | FBgn0030693-F        | CTGCTGCTAATCGGGGAACA      | 80  | 58.3 |
|          | FBgn0030693-R        | CCACACAACGGCCAAATACG      |     |      |
| CG15531  | FBgn0039755-F        | TCACCCTCCTTGGCACCTTG      | 96  | 58.3 |
|          | FBgn0039755-R        | TGAGGAAAACCTTCAGGGGC      |     |      |
| λTry     | FBgn0043470-F        | ACAACACACTCCTGGGCATT      | 118 | 58.3 |
|          | FBgn0043470-R        | TTATCCGCAACGGTCTCCAC      |     |      |
| Pp2A-29B | FBgn0260439-F        | GATCCCGTTGCCAATGTTTCG     | 99  | 58.3 |
|          | FBgn0260439-R        | TGTGGGCTTTACTTGGGCAT      |     |      |
| GLS      | FBgn0261625-F        | AGGACAGCATCAGGCAGAAG      | 109 | 59.4 |
|          | FBgn0261625-R        | TCCACCTTCTCCTCCTCCAC      |     |      |
| Vha68-1  | FBgn0265262-F        | CCATTGTGCGAGCTGTGTCT      | 83  | 59.4 |
|          | FBgn0265262-R        | GAACACCTGCACGATACCCA      |     |      |
|          | XLOC_000246-F        | GTCATAACTGGGCTAAA         | 115 | 56.3 |
|          | XLOC_000246-R        | CACAATCTGATTTCCCT         |     |      |
|          | XLOC_076307-F        | TTCCTGGCTTCTTCGCCTAC      | 103 | 59.4 |
|          | XLOC_076307-R        | GCGCCACCGGCAAAATATAG      |     |      |
|          | XLOC_000071-F        | AATCACCCATTTTGACCGCTT     | 71  | 58.3 |
|          | XLOC_000071-R        | TCTGTTCAACTGGTAAGCAAAAACA |     |      |
|          | XLOC_009418-F        | CAAGCCCATCTTCCAGTTA       | 133 | 58.3 |
|          | XLOC_009418-R        | GAGCGTTTGGCAGTGGTATC      |     |      |
|          | XLOC_052958-F        | TAGGGGTTGCTCCTTTTGGT      | 81  | 58.3 |
|          | XLOC_052958-R        | GCTGAATCCAACGGGTGCTT      |     |      |
|          | XLOC_056059-F        | CACACATTTCCAGCACCACC      | 125 | 58.3 |
|          | XLOC_056059-R        | GCGCGTTTATTTCGTGCCTC      |     |      |
|          | XLOC_072226-F        | TTGTAICTCGCCTGCTTTTGG     | 99  | 58.3 |
|          | XLOC_072226-R        | TTCCCCCAGCAATAGAGCAAG     |     |      |
|          | XLOC_161301-F        | TAGCTGCGAATCTGGCTGAAT     | 74  | 59.4 |
|          | XLOC_161301-R        | GCAGCTACATTGCACTACACC     |     |      |
|          | XLOC_186922-F        | TCCGTAAATACCTCTGGAAGCTG   | 144 | 58.3 |
|          | XLOC_186922-R        | CATGTCCGTATGAACGCCTC      |     |      |
|          | XLOC_201255-F        | GGACATTCAGGACATGCAGGA     | 121 | 58.3 |
|          | XLOC_201255-R        | TTGGCACAGACAACGACGAG      |     |      |
|          | XLOC_067962-F        | GTTGGCCTGCGTTTGAGTG       | 73  | 63.3 |
|          | XLOC_067962-R        | AAAATGCCCGTCTTTTCGGAG     |     |      |
|          | XLOC_071173(trans)-F | CACAAGTGCTGCGTCTAAGTG     | 104 | 63.3 |
|          | XLOC_071173(trans)-R | GACGCGACACAATGCTCTCC      |     |      |
|          | XLOC_071213(trans)-F | TTGTCCAATGCACGCTCAAC      | 122 | 63.3 |
|          | XLOC_071213(trans)-R | GAAATGCAAGGCCACGAAA       |     |      |
|          | XLOC_073604-F        | TTGGCAGTGAGTGGTCGAAA      | 127 | 63.3 |
|          | XLOC_073604-R        | CAAAAATCACGCCCTCGCTC      |     |      |
|          | XLOC_097475-F        | GGAAGAGGAGCACAGACAGAC     | 93  | 63.3 |
|          | XLOC_097475-R        | TTGCAGTTGCCGCTCATTTT      |     |      |
|          | XLOC_106174(trans)-F | CCAGTCGCCATCGTTTTGTT      | 91  | 63.3 |
|          | XLOC_106174(trans)-R | GTAGAGCCAGCCGTATCTGAA     |     |      |

|       |                      |                          |     |       |
|-------|----------------------|--------------------------|-----|-------|
|       | XLOC_118356-F        | AAGCGAGTGCAAGCTACAGA     | 73  | 63.3  |
|       | XLOC_118356-R        | AATGCCCCACGAAAACCCAA     |     |       |
|       | XLOC_151622-F        | CAAAAGGGGGCGTGGTCAA      | 104 | 63.3  |
|       | XLOC_151622-R        | ACAAAGGACGACAAAGGACGA    |     |       |
|       | XLOC_166557(trans)-F | CCTGGAGAGGGGTTGGATGT     | 98  | 63.3  |
|       | XLOC_166557(trans)-R | TGAGGCGCAATTTACAGAGC     |     |       |
|       | XLOC_196039(trans)-F | TAGGCAAGAATGTACCAAGAACT  | 83  | 59    |
|       | XLOC_196039(trans)-R | GCCAAAATACGGCGGGAAA      |     |       |
|       | XLOC_201602-F        | CCAGCTCTTTGGCGATTTGG     | 104 | 61.4  |
|       | XLOC_201602-R        | GAAAAATGGCAAACCCGTGGA    |     |       |
|       | XLOC_000043(trans)-F | AGTTTGGGCCAATTTTCGCAT    | 214 | 63.3  |
|       | XLOC_000043(trans)-R | CGTTTTTCCAAGTTTCGGTCA    |     |       |
|       | XLOC_002137-F        | TCCAATTCAAAATCGCGTCA     | 109 | 63.3  |
|       | XLOC_002137-R        | ACCGTGTGTTCAATTCCTACC    |     |       |
|       | XLOC_007686-F        | TCTACGTCATTTGGCATTGGC    | 85  | 63.3  |
|       | XLOC_007686-R        | ACACTTCACACATCGACAAAACA  |     |       |
|       | XLOC_009798(trans)-F | TTGTTAGCCAGCCAGTCCAG     | 144 | 59    |
|       | XLOC_009798(trans)-R | GCCCCTGACACGCAAAGTA      |     |       |
|       | XLOC_010702(trans)-F | GGCGGCTGTCACTTTTCATT     | 126 | 59    |
|       | XLOC_010702(trans)-R | AGGAACCGCAGGACAAAACA     |     |       |
|       | XLOC_059066(-inf)-F  | CAGCGAAAGAAAACAGGTTAGTCA | 122 | 63.3  |
|       | XLOC_059066(-inf)-R  | GCGAGAGTATTAAGCCAGCCA    |     |       |
|       | XLOC_066439-F        | TGCTCCTCCCATATTTTCGCAT   | 144 | 63.3  |
|       | XLOC_066439-R        | GCCTCATTGGTTTTTGCTATGT   |     |       |
|       | XLOC_092363-F        | TCTGTCTCGTGGGTATTTGCT    | 70  | 63.3  |
|       | XLOC_092363-R        | GGGTGGGGTTTTATTTGCGG     |     |       |
| GAPDH | FBgn0001128-F        | GTTGCGGCTGAGGGCGGATT     | 94  | 55-65 |
|       | FBgn0001128-R        | AGTTGATGTTGGCCGGGTCCG    |     |       |

**Supplementary Table S3. Tissue specificity of lncRNA and its targets**

| lncRNA Name | Tissue specificity of lncRNA in our study | Target Nmae  | Tissue specificity from flybase                                              |
|-------------|-------------------------------------------|--------------|------------------------------------------------------------------------------|
| XLOC_076307 | Head                                      | Hsp70Bc      | Spermatozoon                                                                 |
|             |                                           | Socs36E      | Digestive system (midgut, hindgut), brain, head, eye                         |
|             |                                           | CG10041      | Male accessory gland                                                         |
| XLOC_009798 | Head, gut, fatbody                        | CG10041      | Male accessory gland                                                         |
|             |                                           | Cyp4p3       | Malpighian tubules, Male accessory gland                                     |
|             |                                           | IscU homolog | Head, eye, brain, thoracic-abdominal ganglion, gut, heart, carcass, ect      |
| XLOC_166557 | Fatbody                                   | globin 1     | Head, crop, hindgut, fatbody, carcass, ect                                   |
| XLOC_000043 | Head, gut, fatbody                        | Pepck        | Head, eye, hindgut, fatbody, heart, carcass, ect                             |
| XLOC_066439 | Gut                                       | Cyp6w1       | Head, hindgut, fatbody, heat, carcass, ect                                   |
| XLOC_106174 | Gut, fatbody                              | Cg25C        | Adult heart, fatbody, carcass, ect                                           |
|             |                                           | Ugt35b       | Head, brain, malpighian tubules, male accessory gland, digestive system, ect |
| XLOC_067962 | Gut, fatbody                              | PGRP-SC1a    | Digestive system, fatbody, ect                                               |
|             |                                           | PGRP-SC2     | Midgut, carcass, salivary gland, ect                                         |
|             |                                           | CG8740       | Adult hindgut, adult salivary gland, head, ect                               |
| XLOC_073604 | Head, gut, fatbody                        | Amy-d        | Adult midgut, carcass                                                        |
| XLOC_097475 | Gut, fatbody                              | inaC         | Eye, head                                                                    |
| XLOC_092363 | Gut, fatbody                              | Hairy        | Midgut, hindgut, crop, fatbody, carcass, ect                                 |
|             |                                           | Cp16         | Adult heart , ovary, carcass, ect                                            |
|             |                                           | Cp18         | Digestive system, ovary, carcass                                             |
|             |                                           | Cp19         | Digestive system, ovary, carcass                                             |
| XLOC_000071 | Head, fatbody                             | CG33970      | Adult head, crop, hindgut, ect                                               |
| XLOC_009418 | Head                                      | CG6048       | Midgut, hindgut, ect                                                         |
|             |                                           | Pp2A-29B     | Brain, hindgut, heart, ovary, ect                                            |
| XLOC_056059 | Head, fatbody                             | inaC         | Eye, head                                                                    |
