# Supplementary material for: LncRNA mediated regulation of aging pathways in Drosophila melanogaster during dietary restriction
Source: Aging (Albany NY). 2016 Sep 27;8(9):2182–97. doi: 10.18632/aging.101062 (PMC5076457; doi:10.18632/aging.101062)
Supplement: Supplementary file 4 [file aging-08-2182-s004.xls]

## Sheet: Sheet1
Chromosome	Software	Type of transcript	Start of position in chromosome	End of position in chromosome	Strand	Novel transcripts ID
211000022278299	Cufflinks	exon	1953	2445	+	gene_id "Novel000001"; transcript_id "Novel000001.1"; exon_number "1"; gene_type "protein_coding";
211000022278882	Cufflinks	exon	51	872	-	gene_id "Novel000002"; transcript_id "Novel000002.1"; exon_number "1"; gene_type "protein_coding";
211000022278960	Cufflinks	exon	710	973	+	gene_id "Novel000003"; transcript_id "Novel000003.1"; exon_number "1"; gene_type "protein_coding";
211000022279056	Cufflinks	exon	277	764	+	gene_id "Novel000004"; transcript_id "Novel000004.1"; exon_number "1"; gene_type "protein_coding";
211000022279056	Cufflinks	exon	832	1009	+	gene_id "Novel000004"; transcript_id "Novel000004.1"; exon_number "2"; gene_type "protein_coding";
211000022279056	Cufflinks	exon	1076	1187	+	gene_id "Novel000004"; transcript_id "Novel000004.1"; exon_number "3"; gene_type "protein_coding";
211000022279056	Cufflinks	exon	1249	1286	+	gene_id "Novel000004"; transcript_id "Novel000004.1"; exon_number "4"; gene_type "protein_coding";
211000022279109	Cufflinks	exon	141	753	+	gene_id "Novel000005"; transcript_id "Novel000005.1"; exon_number "1"; gene_type "protein_coding";
211000022279222	Cufflinks	exon	41	659	+	gene_id "Novel000006"; transcript_id "Novel000006.1"; exon_number "1"; gene_type "protein_coding";
211000022279902	Cufflinks	exon	1549	1751	+	gene_id "Novel000007"; transcript_id "Novel000007.1"; exon_number "1"; gene_type "protein_coding";
211000022280091	Cufflinks	exon	62	1260	-	gene_id "Novel000008"; transcript_id "Novel000008.1"; exon_number "1"; gene_type "protein_coding";
211000022280427	Cufflinks	exon	1	473	-	gene_id "Novel000009"; transcript_id "Novel000009.1"; exon_number "1"; gene_type "protein_coding";
211000022280453	Cufflinks	exon	153	444	+	gene_id "Novel000010"; transcript_id "Novel000010.1"; exon_number "1"; gene_type "protein_coding";
211000022280641	Cufflinks	exon	118	441	-	gene_id "Novel000011"; transcript_id "Novel000011.1"; exon_number "1"; gene_type "protein_coding";
211000022280653	Cufflinks	exon	168	371	-	gene_id "Novel000012"; transcript_id "Novel000012.1"; exon_number "1"; gene_type "protein_coding";
2L	Cufflinks	exon	1357773	1357867	+	gene_id "Novel000013"; transcript_id "Novel000013.1"; exon_number "1"; gene_type "protein_coding";
2L	Cufflinks	exon	1358975	1359193	+	gene_id "Novel000013"; transcript_id "Novel000013.1"; exon_number "2"; gene_type "protein_coding";
2L	Scripture	exon	7220359	7220647	+	gene_id "Novel000014"; transcript_id "Novel000014.1"; exon_number "1"; gene_type "protein_coding";
2L	Scripture	exon	7220705	7221087	+	gene_id "Novel000014"; transcript_id "Novel000014.1"; exon_number "2"; gene_type "protein_coding";
2L	Scripture	exon	7423859	7424291	+	gene_id "Novel000015"; transcript_id "Novel000015.1"; exon_number "1"; gene_type "protein_coding";
2L	Scripture	exon	7425172	7426420	+	gene_id "Novel000015"; transcript_id "Novel000015.1"; exon_number "2"; gene_type "protein_coding";
2L	Cufflinks	exon	9754590	9754791	+	gene_id "Novel000016"; transcript_id "Novel000016.1"; exon_number "1"; gene_type "protein_coding";
2L	Cufflinks	exon	11430568	11430774	+	gene_id "Novel000017"; transcript_id "Novel000017.1"; exon_number "1"; gene_type "protein_coding";
2L	Cufflinks	exon	14349117	14349823	+	gene_id "Novel000018"; transcript_id "Novel000018.1"; exon_number "1"; gene_type "protein_coding";
2L	Scripture	exon	16869342	16870126	+	gene_id "Novel000019"; transcript_id "Novel000019.1"; exon_number "1"; gene_type "protein_coding";
2L	Scripture	exon	16870866	16870997	+	gene_id "Novel000019"; transcript_id "Novel000019.1"; exon_number "2"; gene_type "protein_coding";
2L	Scripture	exon	16877497	16878299	+	gene_id "Novel000019"; transcript_id "Novel000019.1"; exon_number "3"; gene_type "protein_coding";
2L	Cufflinks	exon	16869342	16870997	+	gene_id "Novel000020"; transcript_id "Novel000020.1"; exon_number "1"; gene_type "protein_coding";
2L	Cufflinks	exon	16877497	16878299	+	gene_id "Novel000020"; transcript_id "Novel000020.1"; exon_number "2"; gene_type "protein_coding";
2L	Cufflinks	exon	20484440	20484858	+	gene_id "Novel000021"; transcript_id "Novel000021.1"; exon_number "1"; gene_type "protein_coding";
2L	Cufflinks	exon	20485718	20486014	+	gene_id "Novel000021"; transcript_id "Novel000021.1"; exon_number "2"; gene_type "protein_coding";
2L	Scripture	exon	21657284	21657776	+	gene_id "Novel000022"; transcript_id "Novel000022.1"; exon_number "1"; gene_type "protein_coding";
2L	Scripture	exon	21657833	21658234	+	gene_id "Novel000022"; transcript_id "Novel000022.1"; exon_number "2"; gene_type "protein_coding";
2L	Scripture	exon	21657284	21657667	+	gene_id "Novel000023"; transcript_id "Novel000023.1"; exon_number "1"; gene_type "protein_coding";
2L	Scripture	exon	21657833	21658234	+	gene_id "Novel000023"; transcript_id "Novel000023.1"; exon_number "2"; gene_type "protein_coding";
2L	Cufflinks	exon	23068654	23069261	+	gene_id "Novel000024"; transcript_id "Novel000024.1"; exon_number "1"; gene_type "protein_coding";
2L	Cufflinks	exon	23069892	23071758	+	gene_id "Novel000024"; transcript_id "Novel000024.1"; exon_number "2"; gene_type "protein_coding";
2L	Scripture	exon	23176267	23176373	+	gene_id "Novel000025"; transcript_id "Novel000025.1"; exon_number "1"; gene_type "protein_coding";
2L	Scripture	exon	23176984	23179770	+	gene_id "Novel000025"; transcript_id "Novel000025.1"; exon_number "2"; gene_type "protein_coding";
2L	Scripture	exon	23176287	23176469	+	gene_id "Novel000026"; transcript_id "Novel000026.1"; exon_number "1"; gene_type "protein_coding";
2L	Scripture	exon	23176984	23177334	+	gene_id "Novel000026"; transcript_id "Novel000026.1"; exon_number "2"; gene_type "protein_coding";
2L	Scripture	exon	23177416	23177562	+	gene_id "Novel000026"; transcript_id "Novel000026.1"; exon_number "3"; gene_type "protein_coding";
2L	Scripture	exon	23176295	23176920	+	gene_id "Novel000027"; transcript_id "Novel000027.1"; exon_number "1"; gene_type "protein_coding";
2L	Scripture	exon	23176984	23177334	+	gene_id "Novel000027"; transcript_id "Novel000027.1"; exon_number "2"; gene_type "protein_coding";
2L	Scripture	exon	23177416	23179803	+	gene_id "Novel000027"; transcript_id "Novel000027.1"; exon_number "3"; gene_type "protein_coding";
2L	Cufflinks	exon	611401	611606	-	gene_id "Novel000028"; transcript_id "Novel000028.1"; exon_number "1"; gene_type "protein_coding";
2L	Cufflinks	exon	4659954	4660183	-	gene_id "Novel000029"; transcript_id "Novel000029.1"; exon_number "1"; gene_type "protein_coding";
2L	Scripture	exon	5524024	5526628	-	gene_id "Novel000030"; transcript_id "Novel000030.1"; exon_number "1"; gene_type "protein_coding";
2L	Scripture	exon	5526781	5526892	-	gene_id "Novel000030"; transcript_id "Novel000030.1"; exon_number "2"; gene_type "protein_coding";
2L	Scripture	exon	5524024	5526575	-	gene_id "Novel000031"; transcript_id "Novel000031.1"; exon_number "1"; gene_type "protein_coding";
2L	Scripture	exon	5526781	5526892	-	gene_id "Novel000031"; transcript_id "Novel000031.1"; exon_number "2"; gene_type "protein_coding";
2L	Cufflinks	exon	10156268	10156373	-	gene_id "Novel000032"; transcript_id "Novel000032.1"; exon_number "1"; gene_type "protein_coding";
2L	Cufflinks	exon	10163791	10164362	-	gene_id "Novel000032"; transcript_id "Novel000032.1"; exon_number "2"; gene_type "protein_coding";
2L	Cufflinks	exon	10862833	10862901	-	gene_id "Novel000033"; transcript_id "Novel000033.1"; exon_number "1"; gene_type "protein_coding";
2L	Cufflinks	exon	10864462	10864725	-	gene_id "Novel000033"; transcript_id "Novel000033.1"; exon_number "2"; gene_type "protein_coding";
2L	Cufflinks	exon	11840362	11840862	-	gene_id "Novel000034"; transcript_id "Novel000034.1"; exon_number "1"; gene_type "protein_coding";
2L	Cufflinks	exon	11955031	11958670	-	gene_id "Novel000035"; transcript_id "Novel000035.1"; exon_number "1"; gene_type "protein_coding";
2L	Cufflinks	exon	11961928	11962067	-	gene_id "Novel000035"; transcript_id "Novel000035.1"; exon_number "2"; gene_type "protein_coding";
2L	Cufflinks	exon	11970257	11971083	-	gene_id "Novel000035"; transcript_id "Novel000035.1"; exon_number "3"; gene_type "protein_coding";
2L	Cufflinks	exon	11959037	11962067	-	gene_id "Novel000036"; transcript_id "Novel000036.1"; exon_number "1"; gene_type "protein_coding";
2L	Cufflinks	exon	11970257	11971285	-	gene_id "Novel000036"; transcript_id "Novel000036.1"; exon_number "2"; gene_type "protein_coding";
2L	Cufflinks	exon	12024418	12024866	-	gene_id "Novel000037"; transcript_id "Novel000037.1"; exon_number "1"; gene_type "protein_coding";
2L	Cufflinks	exon	12024941	12025032	-	gene_id "Novel000037"; transcript_id "Novel000037.1"; exon_number "2"; gene_type "protein_coding";
2L	Scripture	exon	14359215	14360641	-	gene_id "Novel000038"; transcript_id "Novel000038.1"; exon_number "1"; gene_type "protein_coding";
2L	Scripture	exon	14360708	14361411	-	gene_id "Novel000038"; transcript_id "Novel000038.1"; exon_number "2"; gene_type "protein_coding";
2L	Scripture	exon	19157894	19158665	-	gene_id "Novel000039"; transcript_id "Novel000039.1"; exon_number "1"; gene_type "protein_coding";
2L	Scripture	exon	19158747	19158908	-	gene_id "Novel000039"; transcript_id "Novel000039.1"; exon_number "2"; gene_type "protein_coding";
2L	Cufflinks	exon	20203048	20203667	-	gene_id "Novel000040"; transcript_id "Novel000040.1"; exon_number "1"; gene_type "protein_coding";
2L	Cufflinks	exon	20203750	20204625	-	gene_id "Novel000040"; transcript_id "Novel000040.1"; exon_number "2"; gene_type "protein_coding";
2L	Cufflinks	exon	21651997	21653247	-	gene_id "Novel000041"; transcript_id "Novel000041.1"; exon_number "1"; gene_type "protein_coding";
2L	Cufflinks	exon	21656499	21657579	-	gene_id "Novel000041"; transcript_id "Novel000041.1"; exon_number "2"; gene_type "protein_coding";
2L	Cufflinks	exon	22149865	22150100	-	gene_id "Novel000042"; transcript_id "Novel000042.1"; exon_number "1"; gene_type "protein_coding";
2L	Cufflinks	exon	23031173	23032347	-	gene_id "Novel000043"; transcript_id "Novel000043.1"; exon_number "1"; gene_type "protein_coding";
2L	Cufflinks	exon	23064919	23065291	-	gene_id "Novel000043"; transcript_id "Novel000043.1"; exon_number "2"; gene_type "protein_coding";
2L	Cufflinks	exon	23393603	23393808	-	gene_id "Novel000044"; transcript_id "Novel000044.1"; exon_number "1"; gene_type "protein_coding";
2R	Cufflinks	exon	3761290	3762723	+	gene_id "Novel000045"; transcript_id "Novel000045.1"; exon_number "1"; gene_type "protein_coding";
2R	Cufflinks	exon	3762781	3763941	+	gene_id "Novel000045"; transcript_id "Novel000045.1"; exon_number "2"; gene_type "protein_coding";
2R	Cufflinks	exon	4261385	4261860	+	gene_id "Novel000046"; transcript_id "Novel000046.1"; exon_number "1"; gene_type "protein_coding";
2R	Cufflinks	exon	4261931	4262822	+	gene_id "Novel000046"; transcript_id "Novel000046.1"; exon_number "2"; gene_type "protein_coding";
2R	Cufflinks	exon	4734237	4734306	+	gene_id "Novel000047"; transcript_id "Novel000047.1"; exon_number "1"; gene_type "protein_coding";
2R	Cufflinks	exon	4735252	4735817	+	gene_id "Novel000047"; transcript_id "Novel000047.1"; exon_number "2"; gene_type "protein_coding";
2R	Scripture	exon	4782787	4783381	+	gene_id "Novel000048"; transcript_id "Novel000048.1"; exon_number "1"; gene_type "protein_coding";
2R	Scripture	exon	4783444	4785489	+	gene_id "Novel000048"; transcript_id "Novel000048.1"; exon_number "2"; gene_type "protein_coding";
2R	Cufflinks	exon	5363410	5365205	+	gene_id "Novel000049"; transcript_id "Novel000049.1"; exon_number "1"; gene_type "protein_coding";
2R	Cufflinks	exon	5365291	5365560	+	gene_id "Novel000049"; transcript_id "Novel000049.1"; exon_number "2"; gene_type "protein_coding";
2R	Cufflinks	exon	5365620	5366915	+	gene_id "Novel000049"; transcript_id "Novel000049.1"; exon_number "3"; gene_type "protein_coding";
2R	Cufflinks	exon	5664168	5665056	+	gene_id "Novel000050"; transcript_id "Novel000050.1"; exon_number "1"; gene_type "protein_coding";
2R	Cufflinks	exon	5665325	5666846	+	gene_id "Novel000050"; transcript_id "Novel000050.1"; exon_number "2"; gene_type "protein_coding";
2R	Cufflinks	exon	6467976	6470780	+	gene_id "Novel000051"; transcript_id "Novel000051.1"; exon_number "1"; gene_type "protein_coding";
2R	Cufflinks	exon	6476317	6476736	+	gene_id "Novel000051"; transcript_id "Novel000051.1"; exon_number "2"; gene_type "protein_coding";
2R	Cufflinks	exon	6492928	6493739	+	gene_id "Novel000052"; transcript_id "Novel000052.1"; exon_number "1"; gene_type "protein_coding";
2R	Cufflinks	exon	6493797	6493954	+	gene_id "Novel000052"; transcript_id "Novel000052.1"; exon_number "2"; gene_type "protein_coding";
2R	Cufflinks	exon	8156644	8156728	+	gene_id "Novel000053"; transcript_id "Novel000053.1"; exon_number "1"; gene_type "protein_coding";
2R	Cufflinks	exon	8157285	8157914	+	gene_id "Novel000053"; transcript_id "Novel000053.1"; exon_number "2"; gene_type "protein_coding";
2R	Scripture	exon	9094936	9095339	+	gene_id "Novel000054"; transcript_id "Novel000054.1"; exon_number "1"; gene_type "protein_coding";
2R	Scripture	exon	9095578	9095629	+	gene_id "Novel000054"; transcript_id "Novel000054.1"; exon_number "2"; gene_type "protein_coding";
2R	Scripture	exon	9095898	9095958	+	gene_id "Novel000054"; transcript_id "Novel000054.1"; exon_number "3"; gene_type "protein_coding";
2R	Scripture	exon	9096150	9096202	+	gene_id "Novel000054"; transcript_id "Novel000054.1"; exon_number "4"; gene_type "protein_coding";
2R	Scripture	exon	9096383	9096438	+	gene_id "Novel000054"; transcript_id "Novel000054.1"; exon_number "5"; gene_type "protein_coding";
2R	Scripture	exon	9096671	9096735	+	gene_id "Novel000054"; transcript_id "Novel000054.1"; exon_number "6"; gene_type "protein_coding";
2R	Scripture	exon	9096926	9096991	+	gene_id "Novel000054"; transcript_id "Novel000054.1"; exon_number "7"; gene_type "protein_coding";
2R	Scripture	exon	9097242	9098136	+	gene_id "Novel000054"; transcript_id "Novel000054.1"; exon_number "8"; gene_type "protein_coding";
2R	Scripture	exon	9095062	9095339	+	gene_id "Novel000055"; transcript_id "Novel000055.1"; exon_number "1"; gene_type "protein_coding";
2R	Scripture	exon	9095578	9095629	+	gene_id "Novel000055"; transcript_id "Novel000055.1"; exon_number "2"; gene_type "protein_coding";
2R	Scripture	exon	9095898	9095958	+	gene_id "Novel000055"; transcript_id "Novel000055.1"; exon_number "3"; gene_type "protein_coding";
2R	Scripture	exon	9096150	9096202	+	gene_id "Novel000055"; transcript_id "Novel000055.1"; exon_number "4"; gene_type "protein_coding";
2R	Scripture	exon	9096383	9096905	+	gene_id "Novel000055"; transcript_id "Novel000055.1"; exon_number "5"; gene_type "protein_coding";
2R	Scripture	exon	9095221	9095629	+	gene_id "Novel000056"; transcript_id "Novel000056.1"; exon_number "1"; gene_type "protein_coding";
2R	Scripture	exon	9095898	9095958	+	gene_id "Novel000056"; transcript_id "Novel000056.1"; exon_number "2"; gene_type "protein_coding";
2R	Scripture	exon	9096150	9096202	+	gene_id "Novel000056"; transcript_id "Novel000056.1"; exon_number "3"; gene_type "protein_coding";
2R	Scripture	exon	9096671	9096735	+	gene_id "Novel000056"; transcript_id "Novel000056.1"; exon_number "4"; gene_type "protein_coding";
2R	Scripture	exon	9096926	9097044	+	gene_id "Novel000056"; transcript_id "Novel000056.1"; exon_number "5"; gene_type "protein_coding";
2R	Scripture	exon	9095221	9095629	+	gene_id "Novel000057"; transcript_id "Novel000057.1"; exon_number "1"; gene_type "protein_coding";
2R	Scripture	exon	9095898	9095958	+	gene_id "Novel000057"; transcript_id "Novel000057.1"; exon_number "2"; gene_type "protein_coding";
2R	Scripture	exon	9096150	9096202	+	gene_id "Novel000057"; transcript_id "Novel000057.1"; exon_number "3"; gene_type "protein_coding";
2R	Scripture	exon	9096383	9096438	+	gene_id "Novel000057"; transcript_id "Novel000057.1"; exon_number "4"; gene_type "protein_coding";
2R	Scripture	exon	9096671	9096735	+	gene_id "Novel000057"; transcript_id "Novel000057.1"; exon_number "5"; gene_type "protein_coding";
2R	Scripture	exon	9096926	9096991	+	gene_id "Novel000057"; transcript_id "Novel000057.1"; exon_number "6"; gene_type "protein_coding";
2R	Scripture	exon	9097242	9098136	+	gene_id "Novel000057"; transcript_id "Novel000057.1"; exon_number "7"; gene_type "protein_coding";
2R	Cufflinks	exon	9550153	9552264	+	gene_id "Novel000058"; transcript_id "Novel000058.1"; exon_number "1"; gene_type "protein_coding";
2R	Cufflinks	exon	9552465	9554605	+	gene_id "Novel000058"; transcript_id "Novel000058.1"; exon_number "2"; gene_type "protein_coding";
2R	Cufflinks	exon	10782980	10783149	+	gene_id "Novel000059"; transcript_id "Novel000059.1"; exon_number "1"; gene_type "protein_coding";
2R	Cufflinks	exon	10784330	10785563	+	gene_id "Novel000059"; transcript_id "Novel000059.1"; exon_number "2"; gene_type "protein_coding";
2R	Scripture	exon	11866528	11866683	+	gene_id "Novel000060"; transcript_id "Novel000060.1"; exon_number "1"; gene_type "protein_coding";
2R	Scripture	exon	11866852	11866911	+	gene_id "Novel000060"; transcript_id "Novel000060.1"; exon_number "2"; gene_type "protein_coding";
2R	Scripture	exon	11866964	11867137	+	gene_id "Novel000060"; transcript_id "Novel000060.1"; exon_number "3"; gene_type "protein_coding";
2R	Scripture	exon	11867188	11867257	+	gene_id "Novel000060"; transcript_id "Novel000060.1"; exon_number "4"; gene_type "protein_coding";
2R	Cufflinks	exon	11866678	11866911	+	gene_id "Novel000061"; transcript_id "Novel000061.1"; exon_number "1"; gene_type "protein_coding";
2R	Cufflinks	exon	11866993	11867137	+	gene_id "Novel000061"; transcript_id "Novel000061.1"; exon_number "2"; gene_type "protein_coding";
2R	Cufflinks	exon	11867188	11867248	+	gene_id "Novel000061"; transcript_id "Novel000061.1"; exon_number "3"; gene_type "protein_coding";
2R	Scripture	exon	12588815	12590360	+	gene_id "Novel000062"; transcript_id "Novel000062.1"; exon_number "1"; gene_type "protein_coding";
2R	Scripture	exon	12590439	12591575	+	gene_id "Novel000062"; transcript_id "Novel000062.1"; exon_number "2"; gene_type "protein_coding";
2R	Scripture	exon	12588815	12590339	+	gene_id "Novel000063"; transcript_id "Novel000063.1"; exon_number "1"; gene_type "protein_coding";
2R	Scripture	exon	12590439	12591575	+	gene_id "Novel000063"; transcript_id "Novel000063.1"; exon_number "2"; gene_type "protein_coding";
2R	Scripture	exon	12589911	12590339	+	gene_id "Novel000064"; transcript_id "Novel000064.1"; exon_number "1"; gene_type "protein_coding";
2R	Scripture	exon	12590408	12592321	+	gene_id "Novel000064"; transcript_id "Novel000064.1"; exon_number "2"; gene_type "protein_coding";
2R	Cufflinks	exon	12862330	12862886	+	gene_id "Novel000065"; transcript_id "Novel000065.1"; exon_number "1"; gene_type "protein_coding";
2R	Cufflinks	exon	12863802	12869172	+	gene_id "Novel000065"; transcript_id "Novel000065.1"; exon_number "2"; gene_type "protein_coding";
2R	Scripture	exon	12862683	12862890	+	gene_id "Novel000066"; transcript_id "Novel000066.1"; exon_number "1"; gene_type "protein_coding";
2R	Scripture	exon	12863802	12864086	+	gene_id "Novel000066"; transcript_id "Novel000066.1"; exon_number "2"; gene_type "protein_coding";
2R	Cufflinks	exon	18358263	18358441	+	gene_id "Novel000067"; transcript_id "Novel000067.1"; exon_number "1"; gene_type "protein_coding";
2R	Cufflinks	exon	18372601	18372638	+	gene_id "Novel000067"; transcript_id "Novel000067.1"; exon_number "2"; gene_type "protein_coding";
2R	Cufflinks	exon	18711400	18711485	+	gene_id "Novel000068"; transcript_id "Novel000068.1"; exon_number "1"; gene_type "protein_coding";
2R	Cufflinks	exon	18711544	18712254	+	gene_id "Novel000068"; transcript_id "Novel000068.1"; exon_number "2"; gene_type "protein_coding";
2R	Cufflinks	exon	19993390	19993601	+	gene_id "Novel000069"; transcript_id "Novel000069.1"; exon_number "1"; gene_type "protein_coding";
2R	Cufflinks	exon	20302246	20302575	+	gene_id "Novel000070"; transcript_id "Novel000070.1"; exon_number "1"; gene_type "protein_coding";
2R	Cufflinks	exon	20302635	20303725	+	gene_id "Novel000070"; transcript_id "Novel000070.1"; exon_number "2"; gene_type "protein_coding";
2R	Cufflinks	exon	21534477	21534856	+	gene_id "Novel000071"; transcript_id "Novel000071.1"; exon_number "1"; gene_type "protein_coding";
2R	Cufflinks	exon	22666421	22666543	+	gene_id "Novel000072"; transcript_id "Novel000072.1"; exon_number "1"; gene_type "protein_coding";
2R	Cufflinks	exon	22666613	22666786	+	gene_id "Novel000072"; transcript_id "Novel000072.1"; exon_number "2"; gene_type "protein_coding";
2R	Cufflinks	exon	23240826	23241030	+	gene_id "Novel000073"; transcript_id "Novel000073.1"; exon_number "1"; gene_type "protein_coding";
2R	Scripture	exon	24778875	24780323	+	gene_id "Novel000074"; transcript_id "Novel000074.1"; exon_number "1"; gene_type "protein_coding";
2R	Cufflinks	exon	24793288	24794021	+	gene_id "Novel000075"; transcript_id "Novel000075.1"; exon_number "1"; gene_type "protein_coding";
2R	Cufflinks	exon	24794079	24794722	+	gene_id "Novel000075"; transcript_id "Novel000075.1"; exon_number "2"; gene_type "protein_coding";
2R	Cufflinks	exon	24794795	24794915	+	gene_id "Novel000075"; transcript_id "Novel000075.1"; exon_number "3"; gene_type "protein_coding";
2R	Cufflinks	exon	24795094	24795804	+	gene_id "Novel000076"; transcript_id "Novel000076.1"; exon_number "1"; gene_type "protein_coding";
2R	Cufflinks	exon	354212	354412	-	gene_id "Novel000077"; transcript_id "Novel000077.1"; exon_number "1"; gene_type "protein_coding";
2R	Cufflinks	exon	994589	995179	-	gene_id "Novel000078"; transcript_id "Novel000078.1"; exon_number "1"; gene_type "protein_coding";
2R	Cufflinks	exon	995251	1000325	-	gene_id "Novel000078"; transcript_id "Novel000078.1"; exon_number "2"; gene_type "protein_coding";
2R	Cufflinks	exon	994595	995144	-	gene_id "Novel000079"; transcript_id "Novel000079.1"; exon_number "1"; gene_type "protein_coding";
2R	Cufflinks	exon	995251	1000448	-	gene_id "Novel000079"; transcript_id "Novel000079.1"; exon_number "2"; gene_type "protein_coding";
2R	Cufflinks	exon	1348182	1349796	-	gene_id "Novel000080"; transcript_id "Novel000080.1"; exon_number "1"; gene_type "protein_coding";
2R	Cufflinks	exon	1349890	1350174	-	gene_id "Novel000080"; transcript_id "Novel000080.1"; exon_number "2"; gene_type "protein_coding";
2R	Scripture	exon	2820424	2825219	-	gene_id "Novel000081"; transcript_id "Novel000081.1"; exon_number "1"; gene_type "protein_coding";
2R	Scripture	exon	2829890	2830438	-	gene_id "Novel000081"; transcript_id "Novel000081.1"; exon_number "2"; gene_type "protein_coding";
2R	Cufflinks	exon	3154204	3154419	-	gene_id "Novel000082"; transcript_id "Novel000082.1"; exon_number "1"; gene_type "protein_coding";
2R	Cufflinks	exon	3712309	3712549	-	gene_id "Novel000083"; transcript_id "Novel000083.1"; exon_number "1"; gene_type "protein_coding";
2R	Scripture	exon	4620261	4622048	-	gene_id "Novel000084"; transcript_id "Novel000084.1"; exon_number "1"; gene_type "protein_coding";
2R	Scripture	exon	4622107	4622733	-	gene_id "Novel000084"; transcript_id "Novel000084.1"; exon_number "2"; gene_type "protein_coding";
2R	Cufflinks	exon	5110569	5111397	-	gene_id "Novel000085"; transcript_id "Novel000085.1"; exon_number "1"; gene_type "protein_coding";
2R	Cufflinks	exon	5111495	5115944	-	gene_id "Novel000085"; transcript_id "Novel000085.1"; exon_number "2"; gene_type "protein_coding";
2R	Scripture	exon	5049210	5052474	-	gene_id "Novel000086"; transcript_id "Novel000086.1"; exon_number "1"; gene_type "protein_coding";
2R	Scripture	exon	5054613	5055812	-	gene_id "Novel000086"; transcript_id "Novel000086.1"; exon_number "2"; gene_type "protein_coding";
2R	Cufflinks	exon	5267525	5267734	-	gene_id "Novel000087"; transcript_id "Novel000087.1"; exon_number "1"; gene_type "protein_coding";
2R	Cufflinks	exon	5267802	5268040	-	gene_id "Novel000087"; transcript_id "Novel000087.1"; exon_number "2"; gene_type "protein_coding";
2R	Cufflinks	exon	5376965	5377983	-	gene_id "Novel000088"; transcript_id "Novel000088.1"; exon_number "1"; gene_type "protein_coding";
2R	Cufflinks	exon	5413214	5413866	-	gene_id "Novel000088"; transcript_id "Novel000088.1"; exon_number "2"; gene_type "protein_coding";
2R	Cufflinks	exon	6283682	6298446	-	gene_id "Novel000089"; transcript_id "Novel000089.1"; exon_number "1"; gene_type "protein_coding";
2R	Cufflinks	exon	6298504	6304921	-	gene_id "Novel000089"; transcript_id "Novel000089.1"; exon_number "2"; gene_type "protein_coding";
2R	Scripture	exon	10649127	10649610	-	gene_id "Novel000090"; transcript_id "Novel000090.1"; exon_number "1"; gene_type "protein_coding";
2R	Scripture	exon	10649671	10650412	-	gene_id "Novel000090"; transcript_id "Novel000090.1"; exon_number "2"; gene_type "protein_coding";
2R	Cufflinks	exon	12881270	12883173	-	gene_id "Novel000091"; transcript_id "Novel000091.1"; exon_number "1"; gene_type "protein_coding";
2R	Cufflinks	exon	13328458	13330954	-	gene_id "Novel000092"; transcript_id "Novel000092.1"; exon_number "1"; gene_type "protein_coding";
2R	Cufflinks	exon	13336952	13337301	-	gene_id "Novel000092"; transcript_id "Novel000092.1"; exon_number "2"; gene_type "protein_coding";
2R	Cufflinks	exon	13333637	13337348	-	gene_id "Novel000093"; transcript_id "Novel000093.1"; exon_number "1"; gene_type "protein_coding";
2R	Cufflinks	exon	13344501	13344788	-	gene_id "Novel000093"; transcript_id "Novel000093.1"; exon_number "2"; gene_type "protein_coding";
2R	Scripture	exon	14769866	14770323	-	gene_id "Novel000094"; transcript_id "Novel000094.1"; exon_number "1"; gene_type "protein_coding";
2R	Scripture	exon	14770385	14771028	-	gene_id "Novel000094"; transcript_id "Novel000094.1"; exon_number "2"; gene_type "protein_coding";
2R	Scripture	exon	16817273	16818500	-	gene_id "Novel000095"; transcript_id "Novel000095.1"; exon_number "1"; gene_type "protein_coding";
2R	Scripture	exon	16818590	16818694	-	gene_id "Novel000095"; transcript_id "Novel000095.1"; exon_number "2"; gene_type "protein_coding";
2R	Scripture	exon	16818979	16819342	-	gene_id "Novel000095"; transcript_id "Novel000095.1"; exon_number "3"; gene_type "protein_coding";
2R	Scripture	exon	16817273	16818531	-	gene_id "Novel000096"; transcript_id "Novel000096.1"; exon_number "1"; gene_type "protein_coding";
2R	Scripture	exon	16818590	16818694	-	gene_id "Novel000096"; transcript_id "Novel000096.1"; exon_number "2"; gene_type "protein_coding";
2R	Scripture	exon	16818979	16819342	-	gene_id "Novel000096"; transcript_id "Novel000096.1"; exon_number "3"; gene_type "protein_coding";
2R	Cufflinks	exon	16817679	16818694	-	gene_id "Novel000097"; transcript_id "Novel000097.1"; exon_number "1"; gene_type "protein_coding";
2R	Cufflinks	exon	16818979	16819290	-	gene_id "Novel000097"; transcript_id "Novel000097.1"; exon_number "2"; gene_type "protein_coding";
2R	Cufflinks	exon	17023716	17026444	-	gene_id "Novel000098"; transcript_id "Novel000098.1"; exon_number "1"; gene_type "protein_coding";
2R	Cufflinks	exon	17026513	17026778	-	gene_id "Novel000098"; transcript_id "Novel000098.1"; exon_number "2"; gene_type "protein_coding";
2R	Scripture	exon	17025534	17026475	-	gene_id "Novel000099"; transcript_id "Novel000099.1"; exon_number "1"; gene_type "protein_coding";
2R	Scripture	exon	17026534	17027283	-	gene_id "Novel000099"; transcript_id "Novel000099.1"; exon_number "2"; gene_type "protein_coding";
2R	Scripture	exon	18529847	18532465	-	gene_id "Novel000100"; transcript_id "Novel000100.1"; exon_number "1"; gene_type "protein_coding";
2R	Scripture	exon	18532518	18532940	-	gene_id "Novel000100"; transcript_id "Novel000100.1"; exon_number "2"; gene_type "protein_coding";
2R	Scripture	exon	18533178	18534599	-	gene_id "Novel000100"; transcript_id "Novel000100.1"; exon_number "3"; gene_type "protein_coding";
2R	Scripture	exon	18535770	18536490	-	gene_id "Novel000100"; transcript_id "Novel000100.1"; exon_number "4"; gene_type "protein_coding";
3L	Cufflinks	exon	380719	381595	+	gene_id "Novel000101"; transcript_id "Novel000101.1"; exon_number "1"; gene_type "protein_coding";
3L	Cufflinks	exon	382159	382241	+	gene_id "Novel000101"; transcript_id "Novel000101.1"; exon_number "2"; gene_type "protein_coding";
3L	Cufflinks	exon	432205	432817	+	gene_id "Novel000101"; transcript_id "Novel000101.1"; exon_number "3"; gene_type "protein_coding";
3L	Cufflinks	exon	1478990	1479369	+	gene_id "Novel000102"; transcript_id "Novel000102.1"; exon_number "1"; gene_type "protein_coding";
3L	Cufflinks	exon	1479478	1479537	+	gene_id "Novel000102"; transcript_id "Novel000102.1"; exon_number "2"; gene_type "protein_coding";
3L	Cufflinks	exon	1479611	1480823	+	gene_id "Novel000102"; transcript_id "Novel000102.1"; exon_number "3"; gene_type "protein_coding";
3L	Scripture	exon	9377828	9378018	+	gene_id "Novel000103"; transcript_id "Novel000103.1"; exon_number "1"; gene_type "protein_coding";
3L	Scripture	exon	9378094	9379082	+	gene_id "Novel000103"; transcript_id "Novel000103.1"; exon_number "2"; gene_type "protein_coding";
3L	Scripture	exon	9379167	9379426	+	gene_id "Novel000103"; transcript_id "Novel000103.1"; exon_number "3"; gene_type "protein_coding";
3L	Scripture	exon	9379486	9380506	+	gene_id "Novel000103"; transcript_id "Novel000103.1"; exon_number "4"; gene_type "protein_coding";
3L	Cufflinks	exon	12626696	12626914	+	gene_id "Novel000104"; transcript_id "Novel000104.1"; exon_number "1"; gene_type "protein_coding";
3L	Cufflinks	exon	16353512	16354623	+	gene_id "Novel000105"; transcript_id "Novel000105.1"; exon_number "1"; gene_type "protein_coding";
3L	Cufflinks	exon	17245888	17246032	+	gene_id "Novel000106"; transcript_id "Novel000106.1"; exon_number "1"; gene_type "protein_coding";
3L	Cufflinks	exon	17263838	17264271	+	gene_id "Novel000106"; transcript_id "Novel000106.1"; exon_number "2"; gene_type "protein_coding";
3L	Scripture	exon	17841287	17841659	+	gene_id "Novel000107"; transcript_id "Novel000107.1"; exon_number "1"; gene_type "protein_coding";
3L	Scripture	exon	17841717	17842301	+	gene_id "Novel000107"; transcript_id "Novel000107.1"; exon_number "2"; gene_type "protein_coding";
3L	Scripture	exon	17842358	17842844	+	gene_id "Novel000107"; transcript_id "Novel000107.1"; exon_number "3"; gene_type "protein_coding";
3L	Scripture	exon	18841152	18841216	+	gene_id "Novel000108"; transcript_id "Novel000108.1"; exon_number "1"; gene_type "protein_coding";
3L	Scripture	exon	18841304	18841573	+	gene_id "Novel000108"; transcript_id "Novel000108.1"; exon_number "2"; gene_type "protein_coding";
3L	Scripture	exon	18841668	18842148	+	gene_id "Novel000108"; transcript_id "Novel000108.1"; exon_number "3"; gene_type "protein_coding";
3L	Scripture	exon	18842214	18842266	+	gene_id "Novel000108"; transcript_id "Novel000108.1"; exon_number "4"; gene_type "protein_coding";
3L	Scripture	exon	18842351	18846248	+	gene_id "Novel000108"; transcript_id "Novel000108.1"; exon_number "5"; gene_type "protein_coding";
3L	Cufflinks	exon	18841382	18842148	+	gene_id "Novel000109"; transcript_id "Novel000109.1"; exon_number "1"; gene_type "protein_coding";
3L	Cufflinks	exon	18842214	18842552	+	gene_id "Novel000109"; transcript_id "Novel000109.1"; exon_number "2"; gene_type "protein_coding";
3L	Cufflinks	exon	18841567	18842148	+	gene_id "Novel000110"; transcript_id "Novel000110.1"; exon_number "1"; gene_type "protein_coding";
3L	Cufflinks	exon	18842214	18842266	+	gene_id "Novel000110"; transcript_id "Novel000110.1"; exon_number "2"; gene_type "protein_coding";
3L	Cufflinks	exon	18842346	18842678	+	gene_id "Novel000110"; transcript_id "Novel000110.1"; exon_number "3"; gene_type "protein_coding";
3L	Scripture	exon	20395353	20398599	+	gene_id "Novel000111"; transcript_id "Novel000111.1"; exon_number "1"; gene_type "protein_coding";
3L	Scripture	exon	20398665	20401922	+	gene_id "Novel000111"; transcript_id "Novel000111.1"; exon_number "2"; gene_type "protein_coding";
3L	Scripture	exon	20453225	20453516	+	gene_id "Novel000112"; transcript_id "Novel000112.1"; exon_number "1"; gene_type "protein_coding";
3L	Scripture	exon	20453902	20453962	+	gene_id "Novel000112"; transcript_id "Novel000112.1"; exon_number "2"; gene_type "protein_coding";
3L	Scripture	exon	20454152	20454212	+	gene_id "Novel000112"; transcript_id "Novel000112.1"; exon_number "3"; gene_type "protein_coding";
3L	Scripture	exon	20454395	20454457	+	gene_id "Novel000112"; transcript_id "Novel000112.1"; exon_number "4"; gene_type "protein_coding";
3L	Scripture	exon	20454645	20456628	+	gene_id "Novel000112"; transcript_id "Novel000112.1"; exon_number "5"; gene_type "protein_coding";
3L	Scripture	exon	21496820	21497021	+	gene_id "Novel000113"; transcript_id "Novel000113.1"; exon_number "1"; gene_type "protein_coding";
3L	Scripture	exon	21498231	21498548	+	gene_id "Novel000113"; transcript_id "Novel000113.1"; exon_number "2"; gene_type "protein_coding";
3L	Cufflinks	exon	22851817	22852194	+	gene_id "Novel000114"; transcript_id "Novel000114.1"; exon_number "1"; gene_type "protein_coding";
3L	Cufflinks	exon	22852411	22854090	+	gene_id "Novel000114"; transcript_id "Novel000114.1"; exon_number "2"; gene_type "protein_coding";
3L	Cufflinks	exon	23149532	23150204	+	gene_id "Novel000115"; transcript_id "Novel000115.1"; exon_number "1"; gene_type "protein_coding";
3L	Cufflinks	exon	23150264	23150329	+	gene_id "Novel000115"; transcript_id "Novel000115.1"; exon_number "2"; gene_type "protein_coding";
3L	Cufflinks	exon	23150453	23150707	+	gene_id "Novel000115"; transcript_id "Novel000115.1"; exon_number "3"; gene_type "protein_coding";
3L	Cufflinks	exon	23813454	23816409	+	gene_id "Novel000116"; transcript_id "Novel000116.1"; exon_number "1"; gene_type "protein_coding";
3L	Cufflinks	exon	23816607	23823713	+	gene_id "Novel000116"; transcript_id "Novel000116.1"; exon_number "2"; gene_type "protein_coding";
3L	Cufflinks	exon	23446170	23446248	+	gene_id "Novel000117"; transcript_id "Novel000117.1"; exon_number "1"; gene_type "protein_coding";
3L	Cufflinks	exon	23446300	23447284	+	gene_id "Novel000117"; transcript_id "Novel000117.1"; exon_number "2"; gene_type "protein_coding";
3L	Cufflinks	exon	23930194	23930272	+	gene_id "Novel000118"; transcript_id "Novel000118.1"; exon_number "1"; gene_type "protein_coding";
3L	Cufflinks	exon	23966903	23967706	+	gene_id "Novel000118"; transcript_id "Novel000118.1"; exon_number "2"; gene_type "protein_coding";
3L	Cufflinks	exon	23930459	23930528	+	gene_id "Novel000119"; transcript_id "Novel000119.1"; exon_number "1"; gene_type "protein_coding";
3L	Cufflinks	exon	23966903	23967706	+	gene_id "Novel000119"; transcript_id "Novel000119.1"; exon_number "2"; gene_type "protein_coding";
3L	Cufflinks	exon	24083574	24083657	+	gene_id "Novel000120"; transcript_id "Novel000120.1"; exon_number "1"; gene_type "protein_coding";
3L	Cufflinks	exon	24084295	24084950	+	gene_id "Novel000120"; transcript_id "Novel000120.1"; exon_number "2"; gene_type "protein_coding";
3L	Cufflinks	exon	25196030	25196273	+	gene_id "Novel000121"; transcript_id "Novel000121.1"; exon_number "1"; gene_type "protein_coding";
3L	Cufflinks	exon	25202026	25206137	+	gene_id "Novel000121"; transcript_id "Novel000121.1"; exon_number "2"; gene_type "protein_coding";
3L	Cufflinks	exon	25666083	25666283	+	gene_id "Novel000122"; transcript_id "Novel000122.1"; exon_number "1"; gene_type "protein_coding";
3L	Cufflinks	exon	26416658	26416943	+	gene_id "Novel000123"; transcript_id "Novel000123.1"; exon_number "1"; gene_type "protein_coding";
3L	Cufflinks	exon	26479385	26479545	+	gene_id "Novel000123"; transcript_id "Novel000123.1"; exon_number "2"; gene_type "protein_coding";
3L	Cufflinks	exon	26589086	26589248	+	gene_id "Novel000123"; transcript_id "Novel000123.1"; exon_number "3"; gene_type "protein_coding";
3L	Cufflinks	exon	26589310	26589462	+	gene_id "Novel000123"; transcript_id "Novel000123.1"; exon_number "4"; gene_type "protein_coding";
3L	Cufflinks	exon	26722260	26722411	+	gene_id "Novel000123"; transcript_id "Novel000123.1"; exon_number "5"; gene_type "protein_coding";
3L	Cufflinks	exon	26875229	26875592	+	gene_id "Novel000123"; transcript_id "Novel000123.1"; exon_number "6"; gene_type "protein_coding";
3L	Cufflinks	exon	26466605	26466805	+	gene_id "Novel000124"; transcript_id "Novel000124.1"; exon_number "1"; gene_type "protein_coding";
3L	Cufflinks	exon	26479385	26479545	+	gene_id "Novel000124"; transcript_id "Novel000124.1"; exon_number "2"; gene_type "protein_coding";
3L	Cufflinks	exon	26589086	26589248	+	gene_id "Novel000124"; transcript_id "Novel000124.1"; exon_number "3"; gene_type "protein_coding";
3L	Cufflinks	exon	26589310	26589462	+	gene_id "Novel000124"; transcript_id "Novel000124.1"; exon_number "4"; gene_type "protein_coding";
3L	Cufflinks	exon	26722260	26722411	+	gene_id "Novel000124"; transcript_id "Novel000124.1"; exon_number "5"; gene_type "protein_coding";
3L	Cufflinks	exon	26875229	26875622	+	gene_id "Novel000124"; transcript_id "Novel000124.1"; exon_number "6"; gene_type "protein_coding";
3L	Scripture	exon	27595121	27595322	+	gene_id "Novel000125"; transcript_id "Novel000125.1"; exon_number "1"; gene_type "protein_coding";
3L	Cufflinks	exon	616335	616494	-	gene_id "Novel000126"; transcript_id "Novel000126.1"; exon_number "1"; gene_type "protein_coding";
3L	Cufflinks	exon	616571	616651	-	gene_id "Novel000126"; transcript_id "Novel000126.1"; exon_number "2"; gene_type "protein_coding";
3L	Cufflinks	exon	736576	737350	-	gene_id "Novel000127"; transcript_id "Novel000127.1"; exon_number "1"; gene_type "protein_coding";
3L	Cufflinks	exon	737430	737477	-	gene_id "Novel000127"; transcript_id "Novel000127.1"; exon_number "2"; gene_type "protein_coding";
3L	Cufflinks	exon	737017	737373	-	gene_id "Novel000128"; transcript_id "Novel000128.1"; exon_number "1"; gene_type "protein_coding";
3L	Cufflinks	exon	737430	737633	-	gene_id "Novel000128"; transcript_id "Novel000128.1"; exon_number "2"; gene_type "protein_coding";
3L	Cufflinks	exon	12129300	12131488	-	gene_id "Novel000129"; transcript_id "Novel000129.1"; exon_number "1"; gene_type "protein_coding";
3L	Cufflinks	exon	18047263	18047761	-	gene_id "Novel000130"; transcript_id "Novel000130.1"; exon_number "1"; gene_type "protein_coding";
3L	Cufflinks	exon	18056766	18057009	-	gene_id "Novel000130"; transcript_id "Novel000130.1"; exon_number "2"; gene_type "protein_coding";
3L	Cufflinks	exon	18081339	18081544	-	gene_id "Novel000131"; transcript_id "Novel000131.1"; exon_number "1"; gene_type "protein_coding";
3L	Cufflinks	exon	18084817	18084971	-	gene_id "Novel000131"; transcript_id "Novel000131.1"; exon_number "2"; gene_type "protein_coding";
3L	Scripture	exon	19422586	19423323	-	gene_id "Novel000132"; transcript_id "Novel000132.1"; exon_number "1"; gene_type "protein_coding";
3L	Scripture	exon	19423379	19423567	-	gene_id "Novel000132"; transcript_id "Novel000132.1"; exon_number "2"; gene_type "protein_coding";
3L	Scripture	exon	19423774	19424183	-	gene_id "Novel000132"; transcript_id "Novel000132.1"; exon_number "3"; gene_type "protein_coding";
3L	Cufflinks	exon	22152927	22153136	-	gene_id "Novel000133"; transcript_id "Novel000133.1"; exon_number "1"; gene_type "protein_coding";
3L	Cufflinks	exon	23393032	23393116	-	gene_id "Novel000134"; transcript_id "Novel000134.1"; exon_number "1"; gene_type "protein_coding";
3L	Cufflinks	exon	23400945	23401096	-	gene_id "Novel000134"; transcript_id "Novel000134.1"; exon_number "2"; gene_type "protein_coding";
3L	Cufflinks	exon	23428974	23429102	-	gene_id "Novel000134"; transcript_id "Novel000134.1"; exon_number "3"; gene_type "protein_coding";
3L	Cufflinks	exon	23448288	23448478	-	gene_id "Novel000134"; transcript_id "Novel000134.1"; exon_number "4"; gene_type "protein_coding";
3L	Cufflinks	exon	23448538	23448613	-	gene_id "Novel000134"; transcript_id "Novel000134.1"; exon_number "5"; gene_type "protein_coding";
3L	Cufflinks	exon	23448674	23448974	-	gene_id "Novel000134"; transcript_id "Novel000134.1"; exon_number "6"; gene_type "protein_coding";
3L	Cufflinks	exon	23448174	23448478	-	gene_id "Novel000135"; transcript_id "Novel000135.1"; exon_number "1"; gene_type "protein_coding";
3L	Cufflinks	exon	23448538	23448613	-	gene_id "Novel000135"; transcript_id "Novel000135.1"; exon_number "2"; gene_type "protein_coding";
3L	Cufflinks	exon	23448674	23448859	-	gene_id "Novel000135"; transcript_id "Novel000135.1"; exon_number "3"; gene_type "protein_coding";
3L	Cufflinks	exon	23833768	23835034	-	gene_id "Novel000136"; transcript_id "Novel000136.1"; exon_number "1"; gene_type "protein_coding";
3R	Cufflinks	exon	940874	941078	+	gene_id "Novel000137"; transcript_id "Novel000137.1"; exon_number "1"; gene_type "protein_coding";
3R	Cufflinks	exon	2116816	2118172	+	gene_id "Novel000138"; transcript_id "Novel000138.1"; exon_number "1"; gene_type "protein_coding";
3R	Cufflinks	exon	2118576	2118991	+	gene_id "Novel000138"; transcript_id "Novel000138.1"; exon_number "2"; gene_type "protein_coding";
3R	Cufflinks	exon	3621206	3621503	+	gene_id "Novel000139"; transcript_id "Novel000139.1"; exon_number "1"; gene_type "protein_coding";
3R	Cufflinks	exon	3621582	3622498	+	gene_id "Novel000139"; transcript_id "Novel000139.1"; exon_number "2"; gene_type "protein_coding";
3R	Cufflinks	exon	4715171	4715677	+	gene_id "Novel000140"; transcript_id "Novel000140.1"; exon_number "1"; gene_type "protein_coding";
3R	Cufflinks	exon	4946502	4946507	+	gene_id "Novel000141"; transcript_id "Novel000141.1"; exon_number "1"; gene_type "protein_coding";
3R	Cufflinks	exon	4946572	4946933	+	gene_id "Novel000141"; transcript_id "Novel000141.1"; exon_number "2"; gene_type "protein_coding";
3R	Cufflinks	exon	5385887	5386028	+	gene_id "Novel000142"; transcript_id "Novel000142.1"; exon_number "1"; gene_type "protein_coding";
3R	Cufflinks	exon	5386147	5386403	+	gene_id "Novel000142"; transcript_id "Novel000142.1"; exon_number "2"; gene_type "protein_coding";
3R	Scripture	exon	9022104	9023415	+	gene_id "Novel000143"; transcript_id "Novel000143.1"; exon_number "1"; gene_type "protein_coding";
3R	Scripture	exon	9023509	9024445	+	gene_id "Novel000143"; transcript_id "Novel000143.1"; exon_number "2"; gene_type "protein_coding";
3R	Scripture	exon	9236606	9236857	+	gene_id "Novel000144"; transcript_id "Novel000144.1"; exon_number "1"; gene_type "protein_coding";
3R	Scripture	exon	9236918	9237281	+	gene_id "Novel000144"; transcript_id "Novel000144.1"; exon_number "2"; gene_type "protein_coding";
3R	Scripture	exon	9630281	9630477	+	gene_id "Novel000145"; transcript_id "Novel000145.1"; exon_number "1"; gene_type "protein_coding";
3R	Scripture	exon	9630628	9631075	+	gene_id "Novel000145"; transcript_id "Novel000145.1"; exon_number "2"; gene_type "protein_coding";
3R	Cufflinks	exon	10083300	10084885	+	gene_id "Novel000146"; transcript_id "Novel000146.1"; exon_number "1"; gene_type "protein_coding";
3R	Cufflinks	exon	10089061	10100619	+	gene_id "Novel000146"; transcript_id "Novel000146.1"; exon_number "2"; gene_type "protein_coding";
3R	Cufflinks	exon	10083300	10083852	+	gene_id "Novel000147"; transcript_id "Novel000147.1"; exon_number "1"; gene_type "protein_coding";
3R	Cufflinks	exon	10089061	10100619	+	gene_id "Novel000147"; transcript_id "Novel000147.1"; exon_number "2"; gene_type "protein_coding";
3R	Scripture	exon	11637070	11637936	+	gene_id "Novel000148"; transcript_id "Novel000148.1"; exon_number "1"; gene_type "protein_coding";
3R	Scripture	exon	11638015	11638544	+	gene_id "Novel000148"; transcript_id "Novel000148.1"; exon_number "2"; gene_type "protein_coding";
3R	Scripture	exon	13971268	13971912	+	gene_id "Novel000149"; transcript_id "Novel000149.1"; exon_number "1"; gene_type "protein_coding";
3R	Scripture	exon	13974155	13974467	+	gene_id "Novel000149"; transcript_id "Novel000149.1"; exon_number "2"; gene_type "protein_coding";
3R	Scripture	exon	13971268	13971945	+	gene_id "Novel000150"; transcript_id "Novel000150.1"; exon_number "1"; gene_type "protein_coding";
3R	Scripture	exon	13974155	13974467	+	gene_id "Novel000150"; transcript_id "Novel000150.1"; exon_number "2"; gene_type "protein_coding";
3R	Scripture	exon	18759121	18760006	+	gene_id "Novel000151"; transcript_id "Novel000151.1"; exon_number "1"; gene_type "protein_coding";
3R	Scripture	exon	18760063	18760198	+	gene_id "Novel000151"; transcript_id "Novel000151.1"; exon_number "2"; gene_type "protein_coding";
3R	Scripture	exon	20573739	20574372	+	gene_id "Novel000152"; transcript_id "Novel000152.1"; exon_number "1"; gene_type "protein_coding";
3R	Scripture	exon	20574442	20575610	+	gene_id "Novel000152"; transcript_id "Novel000152.1"; exon_number "2"; gene_type "protein_coding";
3R	Cufflinks	exon	21296124	21297097	+	gene_id "Novel000153"; transcript_id "Novel000153.1"; exon_number "1"; gene_type "protein_coding";
3R	Cufflinks	exon	21297810	21310981	+	gene_id "Novel000153"; transcript_id "Novel000153.1"; exon_number "2"; gene_type "protein_coding";
3R	Cufflinks	exon	21314428	21314448	+	gene_id "Novel000153"; transcript_id "Novel000153.1"; exon_number "3"; gene_type "protein_coding";
3R	Cufflinks	exon	21296170	21297097	+	gene_id "Novel000154"; transcript_id "Novel000154.1"; exon_number "1"; gene_type "protein_coding";
3R	Cufflinks	exon	21297810	21317672	+	gene_id "Novel000154"; transcript_id "Novel000154.1"; exon_number "2"; gene_type "protein_coding";
3R	Cufflinks	exon	21296170	21310981	+	gene_id "Novel000155"; transcript_id "Novel000155.1"; exon_number "1"; gene_type "protein_coding";
3R	Cufflinks	exon	21314428	21317672	+	gene_id "Novel000155"; transcript_id "Novel000155.1"; exon_number "2"; gene_type "protein_coding";
3R	Scripture	exon	22546087	22546370	+	gene_id "Novel000156"; transcript_id "Novel000156.1"; exon_number "1"; gene_type "protein_coding";
3R	Scripture	exon	22546425	22547801	+	gene_id "Novel000156"; transcript_id "Novel000156.1"; exon_number "2"; gene_type "protein_coding";
3R	Scripture	exon	22546087	22546370	+	gene_id "Novel000157"; transcript_id "Novel000157.1"; exon_number "1"; gene_type "protein_coding";
3R	Scripture	exon	22547812	22548334	+	gene_id "Novel000157"; transcript_id "Novel000157.1"; exon_number "2"; gene_type "protein_coding";
3R	Scripture	exon	26260003	26261113	+	gene_id "Novel000158"; transcript_id "Novel000158.1"; exon_number "1"; gene_type "protein_coding";
3R	Scripture	exon	26261178	26261864	+	gene_id "Novel000158"; transcript_id "Novel000158.1"; exon_number "2"; gene_type "protein_coding";
3R	Cufflinks	exon	27259964	27260415	+	gene_id "Novel000159"; transcript_id "Novel000159.1"; exon_number "1"; gene_type "protein_coding";
3R	Cufflinks	exon	27260467	27261943	+	gene_id "Novel000159"; transcript_id "Novel000159.1"; exon_number "2"; gene_type "protein_coding";
3R	Scripture	exon	28337028	28337088	+	gene_id "Novel000160"; transcript_id "Novel000160.1"; exon_number "1"; gene_type "protein_coding";
3R	Scripture	exon	28337232	28339861	+	gene_id "Novel000160"; transcript_id "Novel000160.1"; exon_number "2"; gene_type "protein_coding";
3R	Cufflinks	exon	28964201	28964408	+	gene_id "Novel000161"; transcript_id "Novel000161.1"; exon_number "1"; gene_type "protein_coding";
3R	Cufflinks	exon	29214311	29217852	+	gene_id "Novel000162"; transcript_id "Novel000162.1"; exon_number "1"; gene_type "protein_coding";
3R	Cufflinks	exon	29218465	29219577	+	gene_id "Novel000162"; transcript_id "Novel000162.1"; exon_number "2"; gene_type "protein_coding";
3R	Scripture	exon	29214412	29215181	+	gene_id "Novel000163"; transcript_id "Novel000163.1"; exon_number "1"; gene_type "protein_coding";
3R	Scripture	exon	29218465	29219524	+	gene_id "Novel000163"; transcript_id "Novel000163.1"; exon_number "2"; gene_type "protein_coding";
3R	Scripture	exon	31757775	31758886	+	gene_id "Novel000164"; transcript_id "Novel000164.1"; exon_number "1"; gene_type "protein_coding";
3R	Scripture	exon	31758963	31759935	+	gene_id "Novel000164"; transcript_id "Novel000164.1"; exon_number "2"; gene_type "protein_coding";
3R	Cufflinks	exon	930847	932969	-	gene_id "Novel000165"; transcript_id "Novel000165.1"; exon_number "1"; gene_type "protein_coding";
3R	Cufflinks	exon	933027	933711	-	gene_id "Novel000165"; transcript_id "Novel000165.1"; exon_number "2"; gene_type "protein_coding";
3R	Cufflinks	exon	2084944	2087980	-	gene_id "Novel000166"; transcript_id "Novel000166.1"; exon_number "1"; gene_type "protein_coding";
3R	Cufflinks	exon	2088036	2089253	-	gene_id "Novel000166"; transcript_id "Novel000166.1"; exon_number "2"; gene_type "protein_coding";
3R	Cufflinks	exon	2097394	2098200	-	gene_id "Novel000167"; transcript_id "Novel000167.1"; exon_number "1"; gene_type "protein_coding";
3R	Cufflinks	exon	2117748	2118034	-	gene_id "Novel000167"; transcript_id "Novel000167.1"; exon_number "2"; gene_type "protein_coding";
3R	Cufflinks	exon	3033322	3033776	-	gene_id "Novel000168"; transcript_id "Novel000168.1"; exon_number "1"; gene_type "protein_coding";
3R	Scripture	exon	5834402	5835938	-	gene_id "Novel000169"; transcript_id "Novel000169.1"; exon_number "1"; gene_type "protein_coding";
3R	Scripture	exon	5835991	5836169	-	gene_id "Novel000169"; transcript_id "Novel000169.1"; exon_number "2"; gene_type "protein_coding";
3R	Scripture	exon	7092245	7092546	-	gene_id "Novel000170"; transcript_id "Novel000170.1"; exon_number "1"; gene_type "protein_coding";
3R	Scripture	exon	7092611	7093046	-	gene_id "Novel000170"; transcript_id "Novel000170.1"; exon_number "2"; gene_type "protein_coding";
3R	Scripture	exon	7093110	7093479	-	gene_id "Novel000170"; transcript_id "Novel000170.1"; exon_number "3"; gene_type "protein_coding";
3R	Scripture	exon	7093537	7093725	-	gene_id "Novel000170"; transcript_id "Novel000170.1"; exon_number "4"; gene_type "protein_coding";
3R	Scripture	exon	7092245	7092546	-	gene_id "Novel000171"; transcript_id "Novel000171.1"; exon_number "1"; gene_type "protein_coding";
3R	Scripture	exon	7092611	7093046	-	gene_id "Novel000171"; transcript_id "Novel000171.1"; exon_number "2"; gene_type "protein_coding";
3R	Scripture	exon	7093110	7093479	-	gene_id "Novel000171"; transcript_id "Novel000171.1"; exon_number "3"; gene_type "protein_coding";
3R	Scripture	exon	7093605	7093725	-	gene_id "Novel000171"; transcript_id "Novel000171.1"; exon_number "4"; gene_type "protein_coding";
3R	Scripture	exon	7092347	7093026	-	gene_id "Novel000172"; transcript_id "Novel000172.1"; exon_number "1"; gene_type "protein_coding";
3R	Scripture	exon	7093110	7093479	-	gene_id "Novel000172"; transcript_id "Novel000172.1"; exon_number "2"; gene_type "protein_coding";
3R	Scripture	exon	7093537	7093887	-	gene_id "Novel000172"; transcript_id "Novel000172.1"; exon_number "3"; gene_type "protein_coding";
3R	Scripture	exon	7092347	7093026	-	gene_id "Novel000173"; transcript_id "Novel000173.1"; exon_number "1"; gene_type "protein_coding";
3R	Scripture	exon	7093110	7093479	-	gene_id "Novel000173"; transcript_id "Novel000173.1"; exon_number "2"; gene_type "protein_coding";
3R	Scripture	exon	7093605	7093887	-	gene_id "Novel000173"; transcript_id "Novel000173.1"; exon_number "3"; gene_type "protein_coding";
3R	Cufflinks	exon	7092498	7093479	-	gene_id "Novel000174"; transcript_id "Novel000174.1"; exon_number "1"; gene_type "protein_coding";
3R	Cufflinks	exon	7093537	7093711	-	gene_id "Novel000174"; transcript_id "Novel000174.1"; exon_number "2"; gene_type "protein_coding";
3R	Cufflinks	exon	7092498	7093479	-	gene_id "Novel000175"; transcript_id "Novel000175.1"; exon_number "1"; gene_type "protein_coding";
3R	Cufflinks	exon	7093605	7093725	-	gene_id "Novel000175"; transcript_id "Novel000175.1"; exon_number "2"; gene_type "protein_coding";
3R	Cufflinks	exon	9425683	9425900	-	gene_id "Novel000176"; transcript_id "Novel000176.1"; exon_number "1"; gene_type "protein_coding";
3R	Scripture	exon	9810020	9810906	-	gene_id "Novel000177"; transcript_id "Novel000177.1"; exon_number "1"; gene_type "protein_coding";
3R	Scripture	exon	9813215	9814382	-	gene_id "Novel000177"; transcript_id "Novel000177.1"; exon_number "2"; gene_type "protein_coding";
3R	Scripture	exon	10053395	10053481	-	gene_id "Novel000178"; transcript_id "Novel000178.1"; exon_number "1"; gene_type "protein_coding";
3R	Scripture	exon	10053728	10053921	-	gene_id "Novel000178"; transcript_id "Novel000178.1"; exon_number "2"; gene_type "protein_coding";
3R	Scripture	exon	10054004	10054187	-	gene_id "Novel000178"; transcript_id "Novel000178.1"; exon_number "3"; gene_type "protein_coding";
3R	Scripture	exon	10054252	10054269	-	gene_id "Novel000178"; transcript_id "Novel000178.1"; exon_number "4"; gene_type "protein_coding";
3R	Scripture	exon	10053929	10054187	-	gene_id "Novel000179"; transcript_id "Novel000179.1"; exon_number "1"; gene_type "protein_coding";
3R	Scripture	exon	10054252	10054269	-	gene_id "Novel000179"; transcript_id "Novel000179.1"; exon_number "2"; gene_type "protein_coding";
3R	Cufflinks	exon	12474487	12475921	-	gene_id "Novel000180"; transcript_id "Novel000180.1"; exon_number "1"; gene_type "protein_coding";
3R	Cufflinks	exon	12477179	12478265	-	gene_id "Novel000181"; transcript_id "Novel000181.1"; exon_number "1"; gene_type "protein_coding";
3R	Cufflinks	exon	16004365	16005672	-	gene_id "Novel000182"; transcript_id "Novel000182.1"; exon_number "1"; gene_type "protein_coding";
3R	Cufflinks	exon	16006997	16008641	-	gene_id "Novel000182"; transcript_id "Novel000182.1"; exon_number "2"; gene_type "protein_coding";
3R	Scripture	exon	17380382	17382406	-	gene_id "Novel000183"; transcript_id "Novel000183.1"; exon_number "1"; gene_type "protein_coding";
3R	Scripture	exon	17382503	17382591	-	gene_id "Novel000183"; transcript_id "Novel000183.1"; exon_number "2"; gene_type "protein_coding";
3R	Scripture	exon	19206130	19206326	-	gene_id "Novel000184"; transcript_id "Novel000184.1"; exon_number "1"; gene_type "protein_coding";
3R	Scripture	exon	19212097	19212306	-	gene_id "Novel000184"; transcript_id "Novel000184.1"; exon_number "2"; gene_type "protein_coding";
3R	Cufflinks	exon	23542039	23542249	-	gene_id "Novel000185"; transcript_id "Novel000185.1"; exon_number "1"; gene_type "protein_coding";
3R	Scripture	exon	23826333	23826434	-	gene_id "Novel000186"; transcript_id "Novel000186.1"; exon_number "1"; gene_type "protein_coding";
3R	Scripture	exon	23827878	23828001	-	gene_id "Novel000186"; transcript_id "Novel000186.1"; exon_number "2"; gene_type "protein_coding";
3R	Scripture	exon	24924418	24924998	-	gene_id "Novel000187"; transcript_id "Novel000187.1"; exon_number "1"; gene_type "protein_coding";
3R	Scripture	exon	24925051	24925343	-	gene_id "Novel000187"; transcript_id "Novel000187.1"; exon_number "2"; gene_type "protein_coding";
3R	Scripture	exon	24924418	24924998	-	gene_id "Novel000188"; transcript_id "Novel000188.1"; exon_number "1"; gene_type "protein_coding";
3R	Scripture	exon	24925061	24925343	-	gene_id "Novel000188"; transcript_id "Novel000188.1"; exon_number "2"; gene_type "protein_coding";
3R	Scripture	exon	25048992	25050585	-	gene_id "Novel000189"; transcript_id "Novel000189.1"; exon_number "1"; gene_type "protein_coding";
3R	Scripture	exon	25050819	25051526	-	gene_id "Novel000189"; transcript_id "Novel000189.1"; exon_number "2"; gene_type "protein_coding";
3R	Scripture	exon	27924432	27925272	-	gene_id "Novel000190"; transcript_id "Novel000190.1"; exon_number "1"; gene_type "protein_coding";
3R	Scripture	exon	27925333	27925645	-	gene_id "Novel000190"; transcript_id "Novel000190.1"; exon_number "2"; gene_type "protein_coding";
3R	Cufflinks	exon	31296871	31297088	-	gene_id "Novel000191"; transcript_id "Novel000191.1"; exon_number "1"; gene_type "protein_coding";
4	Scripture	exon	467404	467693	+	gene_id "Novel000192"; transcript_id "Novel000192.1"; exon_number "1"; gene_type "protein_coding";
4	Scripture	exon	467751	468630	+	gene_id "Novel000192"; transcript_id "Novel000192.1"; exon_number "2"; gene_type "protein_coding";
4	Scripture	exon	467404	467693	+	gene_id "Novel000193"; transcript_id "Novel000193.1"; exon_number "1"; gene_type "protein_coding";
4	Scripture	exon	467755	468630	+	gene_id "Novel000193"; transcript_id "Novel000193.1"; exon_number "2"; gene_type "protein_coding";
4	Scripture	exon	467427	467693	+	gene_id "Novel000194"; transcript_id "Novel000194.1"; exon_number "1"; gene_type "protein_coding";
4	Scripture	exon	467751	467994	+	gene_id "Novel000194"; transcript_id "Novel000194.1"; exon_number "2"; gene_type "protein_coding";
4	Scripture	exon	471014	471215	+	gene_id "Novel000194"; transcript_id "Novel000194.1"; exon_number "3"; gene_type "protein_coding";
4	Scripture	exon	467427	467693	+	gene_id "Novel000195"; transcript_id "Novel000195.1"; exon_number "1"; gene_type "protein_coding";
4	Scripture	exon	467751	467994	+	gene_id "Novel000195"; transcript_id "Novel000195.1"; exon_number "2"; gene_type "protein_coding";
4	Scripture	exon	469157	469330	+	gene_id "Novel000195"; transcript_id "Novel000195.1"; exon_number "3"; gene_type "protein_coding";
4	Scripture	exon	471014	471215	+	gene_id "Novel000195"; transcript_id "Novel000195.1"; exon_number "4"; gene_type "protein_coding";
4	Scripture	exon	467443	467685	+	gene_id "Novel000196"; transcript_id "Novel000196.1"; exon_number "1"; gene_type "protein_coding";
4	Scripture	exon	467900	467994	+	gene_id "Novel000196"; transcript_id "Novel000196.1"; exon_number "2"; gene_type "protein_coding";
4	Scripture	exon	468790	468998	+	gene_id "Novel000196"; transcript_id "Novel000196.1"; exon_number "3"; gene_type "protein_coding";
4	Scripture	exon	469157	469330	+	gene_id "Novel000196"; transcript_id "Novel000196.1"; exon_number "4"; gene_type "protein_coding";
4	Scripture	exon	471014	472520	+	gene_id "Novel000196"; transcript_id "Novel000196.1"; exon_number "5"; gene_type "protein_coding";
4	Scripture	exon	467443	467539	+	gene_id "Novel000197"; transcript_id "Novel000197.1"; exon_number "1"; gene_type "protein_coding";
4	Scripture	exon	467900	467994	+	gene_id "Novel000197"; transcript_id "Novel000197.1"; exon_number "2"; gene_type "protein_coding";
4	Scripture	exon	468790	468998	+	gene_id "Novel000197"; transcript_id "Novel000197.1"; exon_number "3"; gene_type "protein_coding";
4	Scripture	exon	469157	469330	+	gene_id "Novel000197"; transcript_id "Novel000197.1"; exon_number "4"; gene_type "protein_coding";
4	Scripture	exon	471014	472520	+	gene_id "Novel000197"; transcript_id "Novel000197.1"; exon_number "5"; gene_type "protein_coding";
4	Scripture	exon	467443	467539	+	gene_id "Novel000198"; transcript_id "Novel000198.1"; exon_number "1"; gene_type "protein_coding";
4	Scripture	exon	467900	467994	+	gene_id "Novel000198"; transcript_id "Novel000198.1"; exon_number "2"; gene_type "protein_coding";
4	Scripture	exon	468056	468998	+	gene_id "Novel000198"; transcript_id "Novel000198.1"; exon_number "3"; gene_type "protein_coding";
4	Scripture	exon	469157	469330	+	gene_id "Novel000198"; transcript_id "Novel000198.1"; exon_number "4"; gene_type "protein_coding";
4	Scripture	exon	471014	472520	+	gene_id "Novel000198"; transcript_id "Novel000198.1"; exon_number "5"; gene_type "protein_coding";
Unmapped_Scaffold_58_D1862	Scripture	exon	5799	6393	+	gene_id "Novel000199"; transcript_id "Novel000199.1"; exon_number "1"; gene_type "protein_coding";
X	Cufflinks	exon	3597542	3597601	+	gene_id "Novel000200"; transcript_id "Novel000200.1"; exon_number "1"; gene_type "protein_coding";
X	Cufflinks	exon	3619717	3619879	+	gene_id "Novel000200"; transcript_id "Novel000200.1"; exon_number "2"; gene_type "protein_coding";
X	Cufflinks	exon	5696885	5697224	+	gene_id "Novel000201"; transcript_id "Novel000201.1"; exon_number "1"; gene_type "protein_coding";
X	Cufflinks	exon	5697288	5697695	+	gene_id "Novel000201"; transcript_id "Novel000201.1"; exon_number "2"; gene_type "protein_coding";
X	Scripture	exon	9268055	9268461	+	gene_id "Novel000202"; transcript_id "Novel000202.1"; exon_number "1"; gene_type "protein_coding";
X	Scripture	exon	9270731	9271854	+	gene_id "Novel000202"; transcript_id "Novel000202.1"; exon_number "2"; gene_type "protein_coding";
X	Scripture	exon	11579083	11579124	+	gene_id "Novel000203"; transcript_id "Novel000203.1"; exon_number "1"; gene_type "protein_coding";
X	Scripture	exon	11579352	11579399	+	gene_id "Novel000203"; transcript_id "Novel000203.1"; exon_number "2"; gene_type "protein_coding";
X	Scripture	exon	11579512	11579528	+	gene_id "Novel000203"; transcript_id "Novel000203.1"; exon_number "3"; gene_type "protein_coding";
X	Scripture	exon	11579670	11580294	+	gene_id "Novel000203"; transcript_id "Novel000203.1"; exon_number "4"; gene_type "protein_coding";
X	Cufflinks	exon	11579083	11579124	+	gene_id "Novel000204"; transcript_id "Novel000204.1"; exon_number "1"; gene_type "protein_coding";
X	Cufflinks	exon	11579670	11580294	+	gene_id "Novel000204"; transcript_id "Novel000204.1"; exon_number "2"; gene_type "protein_coding";
X	Scripture	exon	13744284	13744969	+	gene_id "Novel000205"; transcript_id "Novel000205.1"; exon_number "1"; gene_type "protein_coding";
X	Scripture	exon	13745030	13746132	+	gene_id "Novel000205"; transcript_id "Novel000205.1"; exon_number "2"; gene_type "protein_coding";
X	Scripture	exon	13744284	13744969	+	gene_id "Novel000206"; transcript_id "Novel000206.1"; exon_number "1"; gene_type "protein_coding";
X	Scripture	exon	13745024	13746348	+	gene_id "Novel000206"; transcript_id "Novel000206.1"; exon_number "2"; gene_type "protein_coding";
X	Scripture	exon	15834821	15835623	+	gene_id "Novel000207"; transcript_id "Novel000207.1"; exon_number "1"; gene_type "protein_coding";
X	Scripture	exon	15836116	15836208	+	gene_id "Novel000207"; transcript_id "Novel000207.1"; exon_number "2"; gene_type "protein_coding";
X	Scripture	exon	15836282	15836397	+	gene_id "Novel000207"; transcript_id "Novel000207.1"; exon_number "3"; gene_type "protein_coding";
X	Scripture	exon	15836525	15836674	+	gene_id "Novel000207"; transcript_id "Novel000207.1"; exon_number "4"; gene_type "protein_coding";
X	Scripture	exon	15836738	15837314	+	gene_id "Novel000207"; transcript_id "Novel000207.1"; exon_number "5"; gene_type "protein_coding";
X	Cufflinks	exon	15836170	15836674	+	gene_id "Novel000208"; transcript_id "Novel000208.1"; exon_number "1"; gene_type "protein_coding";
X	Cufflinks	exon	15836738	15836856	+	gene_id "Novel000208"; transcript_id "Novel000208.1"; exon_number "2"; gene_type "protein_coding";
X	Scripture	exon	21520288	21521055	+	gene_id "Novel000209"; transcript_id "Novel000209.1"; exon_number "1"; gene_type "protein_coding";
X	Scripture	exon	21521112	21522196	+	gene_id "Novel000209"; transcript_id "Novel000209.1"; exon_number "2"; gene_type "protein_coding";
X	Cufflinks	exon	21796573	21796810	+	gene_id "Novel000210"; transcript_id "Novel000210.1"; exon_number "1"; gene_type "protein_coding";
X	Cufflinks	exon	21939353	21939398	+	gene_id "Novel000210"; transcript_id "Novel000210.1"; exon_number "2"; gene_type "protein_coding";
X	Scripture	exon	23221979	23222819	+	gene_id "Novel000211"; transcript_id "Novel000211.1"; exon_number "1"; gene_type "protein_coding";
X	Cufflinks	exon	140562	141155	-	gene_id "Novel000212"; transcript_id "Novel000212.1"; exon_number "1"; gene_type "protein_coding";
X	Cufflinks	exon	141216	141256	-	gene_id "Novel000212"; transcript_id "Novel000212.1"; exon_number "2"; gene_type "protein_coding";
X	Cufflinks	exon	141315	142150	-	gene_id "Novel000212"; transcript_id "Novel000212.1"; exon_number "3"; gene_type "protein_coding";
X	Cufflinks	exon	140562	141256	-	gene_id "Novel000213"; transcript_id "Novel000213.1"; exon_number "1"; gene_type "protein_coding";
X	Cufflinks	exon	141315	141435	-	gene_id "Novel000213"; transcript_id "Novel000213.1"; exon_number "2"; gene_type "protein_coding";
X	Cufflinks	exon	141505	142150	-	gene_id "Novel000213"; transcript_id "Novel000213.1"; exon_number "3"; gene_type "protein_coding";
X	Scripture	exon	3879007	3879315	-	gene_id "Novel000214"; transcript_id "Novel000214.1"; exon_number "1"; gene_type "protein_coding";
X	Scripture	exon	3879805	3880402	-	gene_id "Novel000214"; transcript_id "Novel000214.1"; exon_number "2"; gene_type "protein_coding";
X	Scripture	exon	3880464	3880811	-	gene_id "Novel000214"; transcript_id "Novel000214.1"; exon_number "3"; gene_type "protein_coding";
X	Cufflinks	exon	4387353	4388251	-	gene_id "Novel000215"; transcript_id "Novel000215.1"; exon_number "1"; gene_type "protein_coding";
X	Cufflinks	exon	4393325	4393604	-	gene_id "Novel000215"; transcript_id "Novel000215.1"; exon_number "2"; gene_type "protein_coding";
X	Cufflinks	exon	4459955	4460077	-	gene_id "Novel000215"; transcript_id "Novel000215.1"; exon_number "3"; gene_type "protein_coding";
X	Cufflinks	exon	4387513	4388251	-	gene_id "Novel000216"; transcript_id "Novel000216.1"; exon_number "1"; gene_type "protein_coding";
X	Cufflinks	exon	4393325	4393604	-	gene_id "Novel000216"; transcript_id "Novel000216.1"; exon_number "2"; gene_type "protein_coding";
X	Cufflinks	exon	4393761	4393941	-	gene_id "Novel000216"; transcript_id "Novel000216.1"; exon_number "3"; gene_type "protein_coding";
X	Scripture	exon	4966803	4967078	-	gene_id "Novel000217"; transcript_id "Novel000217.1"; exon_number "1"; gene_type "protein_coding";
X	Scripture	exon	5005882	5006030	-	gene_id "Novel000217"; transcript_id "Novel000217.1"; exon_number "2"; gene_type "protein_coding";
X	Scripture	exon	5046126	5046154	-	gene_id "Novel000217"; transcript_id "Novel000217.1"; exon_number "3"; gene_type "protein_coding";
X	Scripture	exon	5063649	5063794	-	gene_id "Novel000217"; transcript_id "Novel000217.1"; exon_number "4"; gene_type "protein_coding";
X	Cufflinks	exon	6996024	6996399	-	gene_id "Novel000218"; transcript_id "Novel000218.1"; exon_number "1"; gene_type "protein_coding";
X	Cufflinks	exon	6996482	6998070	-	gene_id "Novel000218"; transcript_id "Novel000218.1"; exon_number "2"; gene_type "protein_coding";
X	Cufflinks	exon	6996024	6996421	-	gene_id "Novel000219"; transcript_id "Novel000219.1"; exon_number "1"; gene_type "protein_coding";
X	Cufflinks	exon	6996482	6998070	-	gene_id "Novel000219"; transcript_id "Novel000219.1"; exon_number "2"; gene_type "protein_coding";
X	Cufflinks	exon	6996024	6996388	-	gene_id "Novel000220"; transcript_id "Novel000220.1"; exon_number "1"; gene_type "protein_coding";
X	Cufflinks	exon	6996482	6998070	-	gene_id "Novel000220"; transcript_id "Novel000220.1"; exon_number "2"; gene_type "protein_coding";
X	Cufflinks	exon	7166293	7167290	-	gene_id "Novel000221"; transcript_id "Novel000221.1"; exon_number "1"; gene_type "protein_coding";
X	Cufflinks	exon	7173648	7173942	-	gene_id "Novel000221"; transcript_id "Novel000221.1"; exon_number "2"; gene_type "protein_coding";
X	Cufflinks	exon	7277915	7278523	-	gene_id "Novel000221"; transcript_id "Novel000221.1"; exon_number "3"; gene_type "protein_coding";
X	Scripture	exon	9042477	9042739	-	gene_id "Novel000222"; transcript_id "Novel000222.1"; exon_number "1"; gene_type "protein_coding";
X	Scripture	exon	9048414	9048729	-	gene_id "Novel000222"; transcript_id "Novel000222.1"; exon_number "2"; gene_type "protein_coding";
X	Scripture	exon	9048790	9048997	-	gene_id "Novel000222"; transcript_id "Novel000222.1"; exon_number "3"; gene_type "protein_coding";
X	Scripture	exon	9042477	9042739	-	gene_id "Novel000223"; transcript_id "Novel000223.1"; exon_number "1"; gene_type "protein_coding";
X	Scripture	exon	9048414	9048729	-	gene_id "Novel000223"; transcript_id "Novel000223.1"; exon_number "2"; gene_type "protein_coding";
X	Scripture	exon	9048794	9048997	-	gene_id "Novel000223"; transcript_id "Novel000223.1"; exon_number "3"; gene_type "protein_coding";
X	Scripture	exon	9042477	9042739	-	gene_id "Novel000224"; transcript_id "Novel000224.1"; exon_number "1"; gene_type "protein_coding";
X	Scripture	exon	9048414	9048729	-	gene_id "Novel000224"; transcript_id "Novel000224.1"; exon_number "2"; gene_type "protein_coding";
X	Scripture	exon	9048797	9048997	-	gene_id "Novel000224"; transcript_id "Novel000224.1"; exon_number "3"; gene_type "protein_coding";
X	Scripture	exon	9047890	9048729	-	gene_id "Novel000225"; transcript_id "Novel000225.1"; exon_number "1"; gene_type "protein_coding";
X	Scripture	exon	9048790	9048997	-	gene_id "Novel000225"; transcript_id "Novel000225.1"; exon_number "2"; gene_type "protein_coding";
X	Scripture	exon	9047890	9048729	-	gene_id "Novel000226"; transcript_id "Novel000226.1"; exon_number "1"; gene_type "protein_coding";
X	Scripture	exon	9048797	9048997	-	gene_id "Novel000226"; transcript_id "Novel000226.1"; exon_number "2"; gene_type "protein_coding";
X	Cufflinks	exon	8947831	8948814	-	gene_id "Novel000227"; transcript_id "Novel000227.1"; exon_number "1"; gene_type "protein_coding";
X	Cufflinks	exon	8956272	8957061	-	gene_id "Novel000227"; transcript_id "Novel000227.1"; exon_number "2"; gene_type "protein_coding";
X	Cufflinks	exon	10054161	10055109	-	gene_id "Novel000228"; transcript_id "Novel000228.1"; exon_number "1"; gene_type "protein_coding";
X	Scripture	exon	10113918	10114260	-	gene_id "Novel000229"; transcript_id "Novel000229.1"; exon_number "1"; gene_type "protein_coding";
X	Scripture	exon	10114322	10114671	-	gene_id "Novel000229"; transcript_id "Novel000229.1"; exon_number "2"; gene_type "protein_coding";
X	Scripture	exon	10122635	10123034	-	gene_id "Novel000229"; transcript_id "Novel000229.1"; exon_number "3"; gene_type "protein_coding";
X	Cufflinks	exon	10122070	10123168	-	gene_id "Novel000230"; transcript_id "Novel000230.1"; exon_number "1"; gene_type "protein_coding";
X	Cufflinks	exon	10154330	10154505	-	gene_id "Novel000230"; transcript_id "Novel000230.1"; exon_number "2"; gene_type "protein_coding";
X	Cufflinks	exon	12066776	12069696	-	gene_id "Novel000231"; transcript_id "Novel000231.1"; exon_number "1"; gene_type "protein_coding";
X	Cufflinks	exon	12069750	12069893	-	gene_id "Novel000231"; transcript_id "Novel000231.1"; exon_number "2"; gene_type "protein_coding";
X	Cufflinks	exon	12069970	12070301	-	gene_id "Novel000231"; transcript_id "Novel000231.1"; exon_number "3"; gene_type "protein_coding";
X	Cufflinks	exon	12067093	12068760	-	gene_id "Novel000232"; transcript_id "Novel000232.1"; exon_number "1"; gene_type "protein_coding";
X	Cufflinks	exon	12068870	12069696	-	gene_id "Novel000232"; transcript_id "Novel000232.1"; exon_number "2"; gene_type "protein_coding";
X	Cufflinks	exon	12069799	12069893	-	gene_id "Novel000232"; transcript_id "Novel000232.1"; exon_number "3"; gene_type "protein_coding";
X	Cufflinks	exon	12069970	12070171	-	gene_id "Novel000232"; transcript_id "Novel000232.1"; exon_number "4"; gene_type "protein_coding";
X	Cufflinks	exon	12067096	12068760	-	gene_id "Novel000233"; transcript_id "Novel000233.1"; exon_number "1"; gene_type "protein_coding";
X	Cufflinks	exon	12068863	12069696	-	gene_id "Novel000233"; transcript_id "Novel000233.1"; exon_number "2"; gene_type "protein_coding";
X	Cufflinks	exon	12069750	12069893	-	gene_id "Novel000233"; transcript_id "Novel000233.1"; exon_number "3"; gene_type "protein_coding";
X	Cufflinks	exon	12069970	12070168	-	gene_id "Novel000233"; transcript_id "Novel000233.1"; exon_number "4"; gene_type "protein_coding";
X	Cufflinks	exon	15041957	15048485	-	gene_id "Novel000234"; transcript_id "Novel000234.1"; exon_number "1"; gene_type "protein_coding";
X	Cufflinks	exon	15314867	15317967	-	gene_id "Novel000235"; transcript_id "Novel000235.1"; exon_number "1"; gene_type "protein_coding";
X	Cufflinks	exon	16905534	16906469	-	gene_id "Novel000236"; transcript_id "Novel000236.1"; exon_number "1"; gene_type "protein_coding";
X	Cufflinks	exon	16912674	16913181	-	gene_id "Novel000236"; transcript_id "Novel000236.1"; exon_number "2"; gene_type "protein_coding";
X	Scripture	exon	19322125	19324189	-	gene_id "Novel000237"; transcript_id "Novel000237.1"; exon_number "1"; gene_type "protein_coding";
X	Scripture	exon	19324305	19324677	-	gene_id "Novel000237"; transcript_id "Novel000237.1"; exon_number "2"; gene_type "protein_coding";
X	Scripture	exon	19324735	19325134	-	gene_id "Novel000237"; transcript_id "Novel000237.1"; exon_number "3"; gene_type "protein_coding";
X	Cufflinks	exon	21771842	21772074	-	gene_id "Novel000238"; transcript_id "Novel000238.1"; exon_number "1"; gene_type "protein_coding";
X	Cufflinks	exon	22044608	22044876	-	gene_id "Novel000239"; transcript_id "Novel000239.1"; exon_number "1"; gene_type "protein_coding";
X3X4_mapped_Scaffold_14_D1732	Cufflinks	exon	8642	8862	-	gene_id "Novel000240"; transcript_id "Novel000240.1"; exon_number "1"; gene_type "protein_coding";
Y	Cufflinks	exon	685977	686393	+	gene_id "Novel000241"; transcript_id "Novel000241.1"; exon_number "1"; gene_type "protein_coding";
Y	Scripture	exon	1422497	1422550	+	gene_id "Novel000242"; transcript_id "Novel000242.1"; exon_number "1"; gene_type "protein_coding";
Y	Scripture	exon	1450231	1450408	+	gene_id "Novel000242"; transcript_id "Novel000242.1"; exon_number "2"; gene_type "protein_coding";
Y_mapped_Scaffold_18_D1698	Cufflinks	exon	8411	9174	-	gene_id "Novel000243"; transcript_id "Novel000243.1"; exon_number "1"; gene_type "protein_coding";
Y_mapped_Scaffold_30_D1720	Cufflinks	exon	543	842	-	gene_id "Novel000244"; transcript_id "Novel000244.1"; exon_number "1"; gene_type "protein_coding";
dmel_mitochondrion_genome	Cufflinks	exon	4476	4829	+	gene_id "Novel000245"; transcript_id "Novel000245.1"; exon_number "1"; gene_type "protein_coding";
dmel_mitochondrion_genome	Cufflinks	exon	10952	11090	+	gene_id "Novel000246"; transcript_id "Novel000246.1"; exon_number "1"; gene_type "protein_coding";
dmel_mitochondrion_genome	Cufflinks	exon	11266	11347	+	gene_id "Novel000246"; transcript_id "Novel000246.1"; exon_number "2"; gene_type "protein_coding";
rDNA	Scripture	exon	37509	37790	+	gene_id "Novel000247"; transcript_id "Novel000247.1"; exon_number "1"; gene_type "protein_coding";
rDNA	Scripture	exon	73972	74092	+	gene_id "Novel000247"; transcript_id "Novel000247.1"; exon_number "2"; gene_type "protein_coding";
rDNA	Scripture	exon	47667	47761	+	gene_id "Novel000248"; transcript_id "Novel000248.1"; exon_number "1"; gene_type "protein_coding";
rDNA	Scripture	exon	71772	72180	+	gene_id "Novel000248"; transcript_id "Novel000248.1"; exon_number "2"; gene_type "protein_coding";
