# Supplementary material for: LncRNA mediated regulation of aging pathways in Drosophila melanogaster during dietary restriction
Source: Aging (Albany NY). 2016 Sep 27;8(9):2182–97. doi: 10.18632/aging.101062 (PMC5076457; doi:10.18632/aging.101062)
Supplement: Supplementary file 5 [file aging-08-2182-s005.xls]

## Sheet: Expression level
genes	sample	RNA-seq	qPCR
Cp16	7day_DR_1	1131.26	0.587171
Cp16	7day_DR_2	832.807	0.523866
Cp16	42day_DR_1	1366.92	1.44958
Cp16	42day_DR_2	1054.01	1.46955
Cp16	7day_fully fed_1	2601.75	0.934088
Cp16	7day_fully fed_2	1310.8	1.11814
Cp16	42day_fully fed_1	739.298	1.41942
Cp16	42day_fully fed_2	1501.49	1.16234
Cp18	7day_DR_1	1295.04	0.474211
Cp18	7day_DR_2	819.208	0.524782
Cp18	42day_DR_1	1269.65	1.6447
Cp18	42day_DR_2	717.692	1.85119
Cp18	7day_fully fed_1	2016.15	1.42268
Cp18	7day_fully fed_2	1122.08	1.42081
Cp18	42day_fully fed_1	573.665	0.919872
Cp18	42day_fully fed_2	1691.24	0.777482
Cp19	7day_DR_1	942.334	0.473605
Cp19	7day_DR_2	1074.6	0.687769
Cp19	42day_DR_1	1343.61	1.21001
Cp19	42day_DR_2	1178.09	1.21659
Cp19	7day_fully fed_1	3489.06	1.42507
Cp19	7day_fully fed_2	1693.77	1.29349
Cp19	42day_fully fed_1	1121.71	1.37521
Cp19	42day_fully fed_2	1667.73	0.87331
ems	7day_DR_1	0.238036	4.86882
ems	7day_DR_2	0.283789	4.6596
ems	42day_DR_1	0.0919978	0.769974
ems	42day_DR_2	0.34703	0.518428
ems	7day_fully fed_1	0.234421	0.51925
ems	7day_fully fed_2	0.209065	0.542558
ems	42day_fully fed_1	0.0800561	0.655879
ems	42day_fully fed_2	0.0759103	0.633065
Arr2	7day_DR_1	196.936	0.844645
Arr2	7day_DR_2	207.076	0.622488
Arr2	42day_DR_1	118.571	1.11575
Arr2	42day_DR_2	228.265	0.964554
Arr2	7day_fully fed_1	131.289	0.954188
Arr2	7day_fully fed_2	142.473	0.711165
Arr2	42day_fully fed_1	111.944	2.05924
Arr2	42day_fully fed_2	99.405	1.73075
globin	7day_DR_1	124.053	1.09446
globin	7day_DR_2	111.046	1.12046
globin	42day_DR_1	78.7876	1.1117
globin	42day_DR_2	105.53	1.13459
globin	7day_fully fed_1	78.7729	0.65954
globin	7day_fully fed_2	77.9266	0.657769
globin	42day_fully fed_1	112.8	1.14746
globin	42day_fully fed_2	103.972	1.33777
hairy	7day_DR_1	6.78575	2.2366
hairy	7day_DR_2	6.53978	2.21269
hairy	42day_DR_1	6.5829	1.50151
hairy	42day_DR_2	16.4493	1.43683
hairy	7day_fully fed_1	6.93894	0.391414
hairy	7day_fully fed_2	6.26385	0.345806
hairy	42day_fully fed_1	4.46511	0.870952
hairy	42day_fully fed_2	6.76592	0.813825
IscU	7day_DR_1	177.913	0.69635
IscU	7day_DR_2	216.771	0.686541
IscU	42day_DR_1	252.844	1.52128
IscU	42day_DR_2	300.107	1.60661
IscU	7day_fully fed_1	149.114	0.232912
IscU	7day_fully fed_2	133.903	0.261879
IscU	42day_fully fed_1	185.395	4.22986
IscU	42day_fully fed_2	193.288	4.49908
PGRP-S7day_fully fed_2	7day_DR_1	67.4174	1.60309
PGRP-S7day_fully fed_2	7day_DR_2	62.8242	1.56833
PGRP-S7day_fully fed_2	42day_DR_1	37.1483	0.687078
PGRP-S7day_fully fed_2	42day_DR_2	57.7867	0.735537
PGRP-S7day_fully fed_2	7day_fully fed_1	55.1935	0.803413
PGRP-S7day_fully fed_2	7day_fully fed_2	42.8226	0.728411
PGRP-S7day_fully fed_2	42day_fully fed_1	41.2549	1.28618
PGRP-S7day_fully fed_2	42day_fully fed_2	61.6132	1.18071
Socs36E	7day_DR_1	9.2729	0.657307
Socs36E	7day_DR_2	0	0.752776
Socs36E	42day_DR_1	18.4548	1.70005
Socs36E	42day_DR_2	0	1.35383
Socs36E	7day_fully fed_1	5.84688	0.724407
Socs36E	7day_fully fed_2	0	0.67684
Socs36E	42day_fully fed_1	10.001	1.31517
Socs36E	42day_fully fed_2	0	1.57515
CG9733	7day_DR_1	0.119644	0.992792
CG9733	7day_DR_2	0.591789	1.08286
CG9733	42day_DR_1	0.385767	0.655915
CG9733	42day_DR_2	2.55932	0.6576
CG9733	7day_fully fed_1	1.77744e-05	0.547435
CG9733	7day_fully fed_2	0.133606	0.555702
CG9733	42day_fully fed_1	0	2.82191
CG9733	42day_fully fed_2	1.55403	2.5454
Cyp6w1	7day_DR_1	38.2689	2.14898
Cyp6w1	7day_DR_2	57.3908	2.43346
Cyp6w1	42day_DR_1	125.794	0.558233
Cyp6w1	42day_DR_2	139.754	0.503379
Cyp6w1	7day_fully fed_1	144.142	0.682762
Cyp6w1	7day_fully fed_2	98.2744	0.644811
Cyp6w1	42day_fully fed_1	145.602	1.31576
Cyp6w1	42day_fully fed_2	178.236	1.20175
CG11192	7day_DR_1	1.90439	5.38442
CG11192	7day_DR_2	1.83104	5.05467
CG11192	42day_DR_1	2.72414	0.358569
CG11192	42day_DR_2	2.91954	0.366568
CG11192	7day_fully fed_1	1.0248	0.882111
CG11192	7day_fully fed_2	0.913156	0.726214
CG11192	42day_fully fed_1	8.52595	0.690014
CG11192	42day_fully fed_2	3.92275	0.666108
Gadd45	7day_DR_1	7.8306	3.13253
Gadd45	7day_DR_2	7.08222	2.95572
Gadd45	42day_DR_1	8.32251	0.755561
Gadd45	42day_DR_2	15.2479	0.791505
Gadd45	7day_fully fed_1	6.60126	0.300929
Gadd45	7day_fully fed_2	5.96753	0.292106
Gadd45	42day_fully fed_1	6.99295	1.60113
Gadd45	42day_fully fed_2	7.69109	1.62964
CG12374	7day_DR_1	2886.39	9.78192
CG12374	7day_DR_2	2406.02	8.83315
CG12374	42day_DR_1	1297.82	0.344341
CG12374	42day_DR_2	1383.09	0.382032
CG12374	7day_fully fed_1	1606.02	0.439376
CG12374	7day_fully fed_2	818.896	0.401541
CG12374	42day_fully fed_1	497.23	0.741923
CG12374	42day_fully fed_2	822.817	0.700709
CG9743	7day_DR_1	66.4538	2.50595
CG9743	7day_DR_2	50.6877	2.75736
CG9743	42day_DR_1	38.7547	0.770595
CG9743	42day_DR_2	40.7824	0.73014
CG9743	7day_fully fed_1	47.2384	1.4271
CG9743	7day_fully fed_2	39.5784	1.24257
CG9743	42day_fully fed_1	34.0079	0.408426
CG9743	42day_fully fed_2	34.8672	0.373474
Amy-d	7day_DR_1	53.7339	0.844645
Amy-d	7day_DR_2	51.2652	0.622488
Amy-d	42day_DR_1	70.0377	1.11575
Amy-d	42day_DR_2	55.8132	0.964554
Amy-d	7day_fully fed_1	49.2482	0.954188
Amy-d	7day_fully fed_2	49.9181	0.711165
Amy-d	42day_fully fed_1	94.8781	2.05924
Amy-d	42day_fully fed_2	90.4329	1.73075
Hsc70-1	7day_DR_1	2.01951	0.657307
Hsc70-1	7day_DR_2	2.14342	0.752776
Hsc70-1	42day_DR_1	0.000173162	1.70005
Hsc70-1	42day_DR_2	1.02721	1.35383
Hsc70-1	7day_fully fed_1	1.88179	0.724407
Hsc70-1	7day_fully fed_2	1.90098	0.67684
Hsc70-1	42day_fully fed_1	0.549969	1.31517
Hsc70-1	42day_fully fed_2	0.877244	1.57515
Dip-B	7day_DR_1	55.945	0.589422
Dip-B	7day_DR_2	59.5213	0.613615
Dip-B	42day_DR_1	65.4338	0.828201
Dip-B	42day_DR_2	52.1041	0.839109
Dip-B	7day_fully fed_1	63.0365	1.70768
Dip-B	7day_fully fed_2	69.9459	1.55444
Dip-B	42day_fully fed_1	71.5816	1.26466
Dip-B	42day_fully fed_2	62.2084	1.37983
Gal	7day_DR_1	22.458	0.67138
Gal	7day_DR_2	27.5476	0.840727
Gal	42day_DR_1	25.8832	1.02382
Gal	42day_DR_2	21.4426	1.04232
Gal	7day_fully fed_1	26.1014	0.716269
Gal	7day_fully fed_2	30.2752	0.652249
Gal	42day_fully fed_1	37.9656	1.88189
Gal	42day_fully fed_2	33.3471	2.01239
Hsc70-3	7day_DR_1	19.2694	1.02976
Hsc70-3	7day_DR_2	21.9028	1.16692
Hsc70-3	42day_DR_1	42.1557	1.11844
Hsc70-3	42day_DR_2	122.262	0.932649
Hsc70-3	7day_fully fed_1	8.22689	1.52167
Hsc70-3	7day_fully fed_2	8.86015	1.20806
Hsc70-3	42day_fully fed_1	26.2217	0.810087
Hsc70-3	42day_fully fed_2	34.9072	0.565051
Egfr	7day_DR_1	18.22	1.17428
Egfr	7day_DR_2	20.3802	1.64647
Egfr	42day_DR_1	19.1306	0.968083
Egfr	42day_DR_2	24.2755	0.901384
Egfr	7day_fully fed_1	12.8615	1.03121
Egfr	7day_fully fed_2	15.9849	1.01648
Egfr	42day_fully fed_1	16.022	0.83497
Egfr	42day_fully fed_2	15.205	0.71536
CG15046	7day_DR_1	1.02554	0.981261
CG15046	7day_DR_2	0.975974	1.52268
CG15046	42day_DR_1	1.27126	0.9838
CG15046	42day_DR_2	2.33488	0.833206
CG15046	7day_fully fed_1	1.00846	2.11922
CG15046	7day_fully fed_2	0.941237	1.89598
CG15046	42day_fully fed_1	1.2612	0.370939
CG15046	42day_fully fed_2	1.38761	0.586256
CG17323	7day_DR_1	10.2044	1.61669
CG17323	7day_DR_2	12.8018	2.41266
CG17323	42day_DR_1	6.61116	0.874912
CG17323	42day_DR_2	7.86545	0.73525
CG17323	7day_fully fed_1	7.93243	0.813309
CG17323	7day_fully fed_2	9.10013	0.674557
CG17323	42day_fully fed_1	6.42719	0.867079
CG17323	42day_fully fed_2	8.89295	0.879165
Pepck	7day_DR_1	334.623	1.31236
Pepck	7day_DR_2	297.551	2.17677
Pepck	42day_DR_1	536.438	0.938461
Pepck	42day_DR_2	563.942	0.950316
Pepck	7day_fully fed_1	198.948	0.382593
Pepck	7day_fully fed_2	246.753	0.74086
Pepck	42day_fully fed_1	255.414	0.556784
Pepck	42day_fully fed_2	368.728	0.474641
Spat	7day_DR_1	45.1528	0.845816
Spat	7day_DR_2	47.8573	1.26895
Spat	42day_DR_1	59.8052	0.683343
Spat	42day_DR_2	58.3953	0.522517
Spat	7day_fully fed_1	40.5576	0.465388
Spat	7day_fully fed_2	44.5846	0.623814
Spat	42day_fully fed_1	57.352	1.01971
Spat	42day_fully fed_2	56.0496	1.17647
CG13284	7day_DR_1	27.3709	0.8793
CG13284	7day_DR_2	33.6432	1.78084
CG13284	42day_DR_1	26.5297	0.689618
CG13284	42day_DR_2	27.1215	1.23922
CG13284	7day_fully fed_1	20.2282	0.4464
CG13284	7day_fully fed_2	21.6092	0.971953
CG13284	42day_fully fed_1	24.5374	0.751136
CG13284	42day_fully fed_2	25.5986	0.826151
SPH93	7day_DR_1	0.341328	0.801666
SPH93	7day_DR_2	0.232558	1.48494
SPH93	42day_DR_1	7.62552	2.68718
SPH93	42day_DR_2	1.06322	2.34024
SPH93	7day_fully fed_1	0.225874	0.499281
SPH93	7day_fully fed_2	0.205591	1.1046
SPH93	42day_fully fed_1	0.314794	0.230884
SPH93	42day_fully fed_2	0.72097	0.222844
CG8740	7day_DR_1	6.69404	2.35548
CG8740	7day_DR_2	8.5068	3.07872
CG8740	42day_DR_1	10.2699	1.70437
CG8740	42day_DR_2	11.4796	1.8944
CG8740	7day_fully fed_1	6.31254	0.334616
CG8740	7day_fully fed_2	7.15819	0.641485
CG8740	42day_fully fed_1	6.79149	0.200702
CG8740	42day_fully fed_2	8.28565	0.404336
Hsp70Bc	7day_DR_1	1.51911	0.625634
Hsp70Bc	7day_DR_2	0.525673	1.66956
Hsp70Bc	42day_DR_1	2.89132	2.40506
Hsp70Bc	42day_DR_2	11.3505	2.69884
Hsp70Bc	7day_fully fed_1	0.402284	0.171185
Hsp70Bc	7day_fully fed_2	0.246878	0.244189
Hsp70Bc	42day_fully fed_1	2.80265	0.945417
Hsp70Bc	42day_fully fed_2	2.65741	1.25268
Cyp2842day_fully fed_2	7day_DR_1	0.734866	1.06983
Cyp2842day_fully fed_2	7day_DR_2	0.851855	3.07149
Cyp2842day_fully fed_2	42day_DR_1	0.708998	0.505612
Cyp2842day_fully fed_2	42day_DR_2	1.46728	0.515711
Cyp2842day_fully fed_2	7day_fully fed_1	0.574483	1.11821
Cyp2842day_fully fed_2	7day_fully fed_2	0.537912	1.08365
Cyp2842day_fully fed_2	42day_fully fed_1	0.494205	0.30188
Cyp2842day_fully fed_2	42day_fully fed_2	0.374717	0.9015
PGRP-S7day_fully fed_1a	7day_DR_1	21.5625	2.32617
PGRP-S7day_fully fed_1a	7day_DR_2	25.2382	3.73863
PGRP-S7day_fully fed_1a	42day_DR_1	4.45791	0.641161
PGRP-S7day_fully fed_1a	42day_DR_2	11.0646	0.965861
PGRP-S7day_fully fed_1a	7day_fully fed_1	23.33	1.24966
PGRP-S7day_fully fed_1a	7day_fully fed_2	7.16945	1.35162
PGRP-S7day_fully fed_1a	42day_fully fed_1	4.79961	0.721516
PGRP-S7day_fully fed_1a	42day_fully fed_2	3.13808	0.629032
CG31810	7day_DR_1	7.11884	1.34124
CG31810	7day_DR_2	7.43161	1.30867
CG31810	42day_DR_1	6.42299	0.697229
CG31810	42day_DR_2	7.21977	1.09333
CG31810	7day_fully fed_1	4.96037	0.72267
CG31810	7day_fully fed_2	3.80723	0.867192
CG31810	42day_fully fed_1	4.87305	1.06212
CG31810	42day_fully fed_2	6.73961	0.750329
CG34383	7day_DR_1	0.168831	1.88073
CG34383	7day_DR_2	0.162597	2.0834
CG34383	42day_DR_1	0.136583	0.846881
CG34383	42day_DR_2	0.326502	1.24565
CG34383	7day_fully fed_1	0.315149	0.88063
CG34383	7day_fully fed_2	0.296874	0.674012
CG34383	42day_fully fed_1	0.110227	0.734424
CG34383	42day_fully fed_2	0.114069	0.550998
al-AA	7day_DR_1	5.72734	1.93965
al-AA	7day_DR_2	5.48191	1.92245
al-AA	42day_DR_1	4.67183	0.548049
al-AA	42day_DR_2	8.16268	0.72739
al-AA	7day_fully fed_1	4.95531	0.645334
al-AA	7day_fully fed_2	4.91718	0.723998
al-AA	42day_fully fed_1	3.90918	0.524537
al-AA	42day_fully fed_2	4.19335	0.784699
CG33970	7day_DR_1	15.0461	1.35175
CG33970	7day_DR_2	17.6281	2.09979
CG33970	42day_DR_1	11.845	0.641382
CG33970	42day_DR_2	18.9598	0.401375
CG33970	7day_fully fed_1	11.6933	0.567881
CG33970	7day_fully fed_2	12.3062	0.769244
CG33970	42day_fully fed_1	12.4981	0.404264
CG33970	42day_fully fed_2	13.8355	0.775865
Frq2	7day_DR_1	0.328166	2.4169
Frq2	7day_DR_2	0.298274	3.99458
Frq2	42day_DR_1	0.2297	0.722574
Frq2	42day_DR_2	0.414157	0.991694
Frq2	7day_fully fed_1	0.000127582	0.491962
Frq2	7day_fully fed_2	0.287248	0.712291
Frq2	42day_fully fed_1	0.255683	0.211534
Frq2	42day_fully fed_2	0.332365	0.416394
CG34384	7day_DR_1	1.04873e-05	1.55301
CG34384	7day_DR_2	0.06495	2.57776
CG34384	42day_DR_1	0.136246	0.87139
CG34384	42day_DR_2	0.0466939	1.17112
CG34384	7day_fully fed_1	0.120359	0.56412
CG34384	7day_fully fed_2	0	0.84668
CG34384	42day_fully fed_1	0.0436637	0.253163
CG34384	42day_fully fed_2	0.0547376	0.536364
nvd	7day_DR_1	1.62272	1.54007
nvd	7day_DR_2	1.88472	2.15608
nvd	42day_DR_1	3.36327	0.959922
nvd	42day_DR_2	2.7504	1.27626
nvd	7day_fully fed_1	1.7301	0.504616
nvd	7day_fully fed_2	1.14549	0.634339
nvd	42day_fully fed_1	2.368	0.36689
nvd	42day_fully fed_2	2.17642	0.647039
CG6048	7day_DR_1	7.85167	3.25774
CG6048	7day_DR_2	6.08338	3.94873
CG6048	42day_DR_1	5.45929	0.980889
CG6048	42day_DR_2	4.82064	0.890427
CG6048	7day_fully fed_1	5.18386	0.726111
CG6048	7day_fully fed_2	3.79435	0.672538
CG6048	42day_fully fed_1	2.61336	0.46754
CG6048	42day_fully fed_2	3.47958	0.413664
δTry	7day_DR_1	8.25602	1.76523
δTry	7day_DR_2	6.76919	0.675929
δTry	42day_DR_1	2.64681	0.416639
δTry	42day_DR_2	2.73519	1.14747
δTry	7day_fully fed_1	8.60502	0.679023
δTry	7day_fully fed_2	6.70684	1.45788
δTry	42day_fully fed_1	1.71621	0.390006
δTry	42day_fully fed_2	4.03107	1.45645
CG8974	7day_DR_1	50.8552	0.784436
CG8974	7day_DR_2	48.332	0.825397
CG8974	42day_DR_1	52.351	1.32238
CG8974	42day_DR_2	51.3268	1.97923
CG8974	7day_fully fed_1	32.6104	0.880412
CG8974	7day_fully fed_2	31.4328	0.965555
CG8974	42day_fully fed_1	61.1285	0.944412
CG8974	42day_fully fed_2	48.6659	0.915194
CG15531	7day_DR_1	38.7654	1.26933
CG15531	7day_DR_2	41.576	1.43614
CG15531	42day_DR_1	26.5372	0.890927
CG15531	42day_DR_2	28.6024	1.16691
CG15531	7day_fully fed_1	26.4084	0.657635
CG15531	7day_fully fed_2	25.9006	0.777135
CG15531	42day_fully fed_1	21.5887	0.709815
CG15531	42day_fully fed_2	24.1419	0.931536
CR31781	7day_DR_1	0.0624769	0.896847
CR31781	7day_DR_2	0	1.01471
CR31781	42day_DR_1	0	0.993668
CR31781	42day_DR_2	0	0.881702
CR31781	7day_fully fed_1	0.208691	0.605148
CR31781	7day_fully fed_2	0	0.969317
CR31781	42day_fully fed_1	0.14529	0.621417
CR31781	42day_fully fed_2	0	0.725878
Vha68-1	7day_DR_1	16.2311	1.00876
Vha68-1	7day_DR_2	17.9607	1.00603
Vha68-1	42day_DR_1	12.8742	0.902858
Vha68-1	42day_DR_2	17.4455	1.07478
Vha68-1	7day_fully fed_1	10.7165	1.01947
Vha68-1	7day_fully fed_2	11.5032	0.973111
Vha68-1	42day_fully fed_1	9.4371	0.878413
Vha68-1	42day_fully fed_2	10.2345	0.673536
Cg25C	7day_DR_1	17.3407	1.32723
Cg25C	7day_DR_2	20.0175	1.09145
Cg25C	42day_DR_1	13.4553	0.723052
Cg25C	42day_DR_2	14.5806	1.07629
Cg25C	7day_fully fed_1	11.5189	0.680476
Cg25C	7day_fully fed_2	12.3328	0.935332
Cg25C	42day_fully fed_1	12.7746	0.872307
Cg25C	42day_fully fed_2	11.2582	0.920558
5-HT1A	7day_DR_1	0.443863	1.44837
5-HT1A	7day_DR_2	0.67191	1.23806
5-HT1A	42day_DR_1	0.589	0.863517
5-HT1A	42day_DR_2	0.807428	0.955354
5-HT1A	7day_fully fed_1	0.470359	0.946854
5-HT1A	7day_fully fed_2	0.574183	1.05257
5-HT1A	42day_fully fed_1	0.310938	0.667682
5-HT1A	42day_fully fed_2	0.352522	0.559071
ηTry	7day_DR_1	25.1201	0.61852
ηTry	7day_DR_2	27.2324	0.750081
ηTry	42day_DR_1	19.776	0.917322
ηTry	42day_DR_2	22.8373	0.829974
ηTry	7day_fully fed_1	20.3576	0.691436
ηTry	7day_fully fed_2	13.0354	1.33478
ηTry	42day_fully fed_1	19.7391	1.11966
ηTry	42day_fully fed_2	16.612	0.884678
Zyx	7day_DR_1	0	0.799733
Zyx	7day_DR_2	0	0.696019
Zyx	42day_DR_1	0.611124	1.15214
Zyx	42day_DR_2	0	1.28705
Zyx	7day_fully fed_1	0	0.850099
Zyx	7day_fully fed_2	2.96904	0.983508
Zyx	42day_fully fed_1	0	1.50849
Zyx	42day_fully fed_2	0	1.06504
θTry	7day_DR_1	185.857	1.61673
θTry	7day_DR_2	189.805	1.17052
θTry	42day_DR_1	77.5075	0.70003
θTry	42day_DR_2	97.0296	0.787202
θTry	7day_fully fed_1	161.455	0.889987
θTry	7day_fully fed_2	99.4649	1.3795
θTry	42day_fully fed_1	66.8778	0.657996
θTry	42day_fully fed_2	80.7058	0.956528
ζTry	7day_DR_1	21.3542	1.21483
ζTry	7day_DR_2	26.1718	1.10436
ζTry	42day_DR_1	13.5301	0.906102
ζTry	42day_DR_2	19.6465	0.484757
ζTry	7day_fully fed_1	18.8884	0.668844
ζTry	7day_fully fed_2	10.26	1.18614
ζTry	42day_fully fed_1	7.94587	0.541547
ζTry	42day_fully fed_2	7.61321	1.00237
GstE12	7day_DR_1	184.17	0.657938
GstE12	7day_DR_2	206.181	0.682113
GstE12	42day_DR_1	156.192	0.839588
GstE12	42day_DR_2	174.029	0.44726
GstE12	7day_fully fed_1	148.034	0.824115
GstE12	7day_fully fed_2	137.704	0.926814
GstE12	42day_fully fed_1	155.635	1.16741
GstE12	42day_fully fed_2	151.67	1.48007
ιTry	7day_DR_1	25.8642	0.644689
ιTry	7day_DR_2	30.3022	0.751261
ιTry	42day_DR_1	19.8501	0.746141
ιTry	42day_DR_2	20.5548	0.383889
ιTry	7day_fully fed_1	22.8217	1.1403
ιTry	7day_fully fed_2	13.293	1.00348
ιTry	42day_fully fed_1	25.8818	1.47703
ιTry	42day_fully fed_2	17.6326	0.75642
vkg	7day_DR_1	27.4326	1.32304
vkg	7day_DR_2	31.4949	1.11862
vkg	42day_DR_1	18.7675	0.962426
vkg	42day_DR_2	20.541	1.61744
vkg	7day_fully fed_1	18.6798	1.43651
vkg	7day_fully fed_2	18.3185	0.695166
vkg	42day_fully fed_1	17.3097	1.01416
vkg	42day_fully fed_2	15.4785	0.529469
Ugt35b	7day_DR_1	12.0186	0.704292
Ugt35b	7day_DR_2	19.9712	1.29649
Ugt35b	42day_DR_1	10.9496	1.0512
Ugt35b	42day_DR_2	9.69527	1.84791
Ugt35b	7day_fully fed_1	7.60107	1.84831
Ugt35b	7day_fully fed_2	8.84924	0.676732
Ugt35b	42day_fully fed_1	5.68719	0.641903
Ugt35b	42day_fully fed_2	7.47596	0.796032
inaC	7day_DR_1	18.9974	2.4874
inaC	7day_DR_2	21.7018	1.35334
inaC	42day_DR_1	9.64204	0.68406
inaC	42day_DR_2	18.5	0.963888
inaC	7day_fully fed_1	13.2276	0.906171
inaC	7day_fully fed_2	17.5765	1.13106
inaC	42day_fully fed_1	8.95106	0.498803
inaC	42day_fully fed_2	8.95325	0.368939
ash1	7day_DR_1	14.5002	2.76255
ash1	7day_DR_2	16.3784	0.849985
ash1	42day_DR_1	16.8609	1.08688
ash1	42day_DR_2	16.6772	2.05961
ash1	7day_fully fed_1	18.9529	0.626135
ash1	7day_fully fed_2	22.1233	1.22768
ash1	42day_fully fed_1	16.2981	0.642428
ash1	42day_fully fed_2	23.101	0.646866
λTry	7day_DR_1	78.1414	0.913434
λTry	7day_DR_2	85.9218	1.05407
λTry	42day_DR_1	62.1166	0.793758
λTry	42day_DR_2	68.3557	0.303249
λTry	7day_fully fed_1	64.7849	0.742782
λTry	7day_fully fed_2	40.2246	0.929242
λTry	42day_fully fed_1	54.2447	0.848212
λTry	42day_fully fed_2	38.2721	0.64955
GLS	7day_DR_1	0.00225949	0.921759
GLS	7day_DR_2	0.000727602	0.757497
GLS	42day_DR_1	1.78044	1.23702
GLS	42day_DR_2	0.52639	3.12184
GLS	7day_fully fed_1	0	1.19111
GLS	7day_fully fed_2	0	1.01998
GLS	42day_fully fed_1	0.408614	0.54783
GLS	42day_fully fed_2	0.496561	0.620594
Pp2A-29B	7day_DR_1	119.452	1.09657
Pp2A-29B	7day_DR_2	119.517	2.1479
Pp2A-29B	42day_DR_1	157.054	0.966033
Pp2A-29B	42day_DR_2	146.875	1.00739
Pp2A-29B	7day_fully fed_1	127.672	0.9527
Pp2A-29B	7day_fully fed_2	126.22	1.17119
Pp2A-29B	42day_fully fed_1	174.196	1.48792
Pp2A-29B	42day_fully fed_2	157.588	1.03882
CG9220	7day_DR_1	5.76865	2.25227
CG9220	7day_DR_2	6.51976	1.47396
CG9220	42day_DR_1	5.31019	1.16337
CG9220	42day_DR_2	7.06509	2.34942
CG9220	7day_fully fed_1	4.11932	0.869048
CG9220	7day_fully fed_2	4.42762	0.336234
CG9220	42day_fully fed_1	4.55604	0.683785
CG9220	42day_fully fed_2	4.47084	0.958981
εTry	7day_DR_1	694.153	1.71988
εTry	7day_DR_2	470.677	0.621611
εTry	42day_DR_1	251.824	0.526184
εTry	42day_DR_2	238.395	0.421266
εTry	7day_fully fed_1	369.542	0.535677
εTry	7day_fully fed_2	221.777	1.53457
εTry	42day_fully fed_1	204.081	0.510682
εTry	42day_fully fed_2	251.019	1.51601
XLOC_166557	7day_DR_1	0	0.931416
XLOC_166557	7day_DR_2	0	0.739666
XLOC_166557	42day_DR_1	1.83932	0.744144
XLOC_166557	42day_DR_2	1.00529	0.593536
XLOC_166557	7day_fully fed_1	2.67109	1.44458
XLOC_166557	7day_fully fed_2	2.81195	1.50903
XLOC_166557	42day_fully fed_1	0	1.33376
XLOC_166557	42day_fully fed_2	0	1.22614
XLOC_118356	7day_DR_1	1.57436	2.4451
XLOC_118356	7day_DR_2	3.3319	2.86064
XLOC_118356	42day_DR_1	1.42075	0.783013
XLOC_118356	42day_DR_2	0	0.718773
XLOC_118356	7day_fully fed_1	2.78619	0.899896
XLOC_118356	7day_fully fed_2	5.92594	0.962108
XLOC_118356	42day_fully fed_1	0	0.595054
XLOC_118356	42day_fully fed_2	0	0.512677
XLOC_196039	7day_DR_1	0.932686	1.9207
XLOC_196039	7day_DR_2	2.96995	2.06944
XLOC_196039	42day_DR_1	0.864512	0.702122
XLOC_196039	42day_DR_2	4.71133	0.604966
XLOC_196039	7day_fully fed_1	0	1.13703
XLOC_196039	7day_fully fed_2	0	1.07868
XLOC_196039	42day_fully fed_1	0	0.698613
XLOC_196039	42day_fully fed_2	0	0.694802
XLOC_201602	7day_DR_1	0	2.08066
XLOC_201602	7day_DR_2	1.03345	2.19928
XLOC_201602	42day_DR_1	0	0.479129
XLOC_201602	42day_DR_2	0.983531	0.585753
XLOC_201602	7day_fully fed_1	0.87138	1.40126
XLOC_201602	7day_fully fed_2	3.6676	1.15278
XLOC_201602	42day_fully fed_1	0	0.699614
XLOC_201602	42day_fully fed_2	0	0.727963
XLOC_007686	7day_DR_1	0	3.20082
XLOC_007686	7day_DR_2	1.6862	3.26382
XLOC_007686	42day_DR_1	0	0.772296
XLOC_007686	42day_DR_2	0	0.800619
XLOC_007686	7day_fully fed_1	0.713509	1.2015
XLOC_007686	7day_fully fed_2	0.747511	1.14362
XLOC_007686	42day_fully fed_1	0	0.373871
XLOC_007686	42day_fully fed_2	0	0.312363
XLOC_009798	7day_DR_1	1.19251	3.68058
XLOC_009798	7day_DR_2	1.68095	3.40815
XLOC_009798	42day_DR_1	3.24865	1.2652
XLOC_009798	42day_DR_2	5.06587	1.30598
XLOC_009798	7day_fully fed_1	0.886491	0.564979
XLOC_009798	7day_fully fed_2	0.874741	0.59601
XLOC_009798	42day_fully fed_1	1.91316	0.409407
XLOC_009798	42day_fully fed_2	1.78001	0.36264
XLOC_010702	7day_DR_1	1.39733	3.42323
XLOC_010702	7day_DR_2	2.96923	3.5043
XLOC_010702	42day_DR_1	0	0.606168
XLOC_010702	42day_DR_2	0	0.639876
XLOC_010702	7day_fully fed_1	0	1.73847
XLOC_010702	7day_fully fed_2	0.657895	1.65358
XLOC_010702	42day_fully fed_1	0	0.40231
XLOC_010702	42day_fully fed_2	0.688906	0.202394
XLOC_059066	7day_DR_1	0	4.83412
XLOC_059066	7day_DR_2	0	4.28098
XLOC_059066	42day_DR_1	2.36509	0.723199
XLOC_059066	42day_DR_2	3.92237	0.664525
XLOC_059066	7day_fully fed_1	0	1.37962
XLOC_059066	7day_fully fed_2	0	1.14133
XLOC_059066	42day_fully fed_1	1.36672	0.298547
XLOC_059066	42day_fully fed_2	0	0.220593
XLOC_000043	7day_DR_1	2.97558	4.20466
XLOC_000043	7day_DR_2	2.84074	4.46803
XLOC_000043	42day_DR_1	5.63819	0.531152
XLOC_000043	42day_DR_2	7.74545	0.550303
XLOC_000043	7day_fully fed_1	2.28905	1.73283
XLOC_000043	7day_fully fed_2	2.13955	1.03961
XLOC_000043	42day_fully fed_1	2.13069	0.366261
XLOC_000043	42day_fully fed_2	3.71986	0.36372
XLOC_002137	7day_DR_1	0.512313	1.52208
XLOC_002137	7day_DR_2	1.63384	2.30792
XLOC_002137	42day_DR_1	2.44892	0.7664
XLOC_002137	42day_DR_2	22.3195	0.478729
XLOC_002137	7day_fully fed_1	2.78711	0.827232
XLOC_002137	7day_fully fed_2	5.30519	0.475657
XLOC_002137	42day_fully fed_1	3.81947	1.68428
XLOC_002137	42day_fully fed_2	9.63405	1.53705
XLOC_066439	7day_DR_1	0	1.94685
XLOC_066439	7day_DR_2	0	2.24804
XLOC_066439	42day_DR_1	2.69064	0.51441
XLOC_066439	42day_DR_2	2.99143	0.516915
XLOC_066439	7day_fully fed_1	1.31714	1.4082
XLOC_066439	7day_fully fed_2	0	0.997014
XLOC_066439	42day_fully fed_1	0	0.870493
XLOC_066439	42day_fully fed_2	0	0.796975
XLOC_092363	7day_DR_1	0	1.41891
XLOC_092363	7day_DR_2	0	1.08646
XLOC_092363	42day_DR_1	0	0.52686
XLOC_092363	42day_DR_2	0	0.553836
XLOC_092363	7day_fully fed_1	1.99279	2.19077
XLOC_092363	7day_fully fed_2	3.15466	1.92171
XLOC_092363	42day_fully fed_1	0	0.568506
XLOC_092363	42day_fully fed_2	0	1.14747
XLOC_071213	7day_DR_1	32.8312	5.27882
XLOC_071213	7day_DR_2	34.1299	7.039
XLOC_071213	42day_DR_1	59.2834	1.91666
XLOC_071213	42day_DR_2	43.0734	1.87273
XLOC_071213	7day_fully fed_1	31.5643	49.1876
XLOC_071213	7day_fully fed_2	19.8599	32.02
XLOC_071213	42day_fully fed_1	39.5629	0.00216209
XLOC_071213	42day_fully fed_2	38.0507	0.00232638
XLOC_067962	7day_DR_1	1.94765	3.95429
XLOC_067962	7day_DR_2	0	2.6606
XLOC_067962	42day_DR_1	0	0.651334
XLOC_067962	42day_DR_2	0	0.523628
XLOC_067962	7day_fully fed_1	3.48552	1.45095
XLOC_067962	7day_fully fed_2	0.9169	1.21668
XLOC_067962	42day_fully fed_1	0	0.54789
XLOC_067962	42day_fully fed_2	0	0.322806
XLOC_071173	7day_DR_1	0	5.42972
XLOC_071173	7day_DR_2	0	3.15938
XLOC_071173	42day_DR_1	4.14664	0.617426
XLOC_071173	42day_DR_2	1.5385	0.41975
XLOC_071173	7day_fully fed_1	0	1.57165
XLOC_071173	7day_fully fed_2	0	1.07018
XLOC_071173	42day_fully fed_1	0	0.416559
XLOC_071173	42day_fully fed_2	0	0.342796
XLOC_151622	7day_DR_1	0	2.87775
XLOC_151622	7day_DR_2	0	3.54867
XLOC_151622	42day_DR_1	0	0.470803
XLOC_151622	42day_DR_2	0	0.578496
XLOC_151622	7day_fully fed_1	2.55918	1.42217
XLOC_151622	7day_fully fed_2	1.79441	1.40019
XLOC_151622	42day_fully fed_1	0	0.541684
XLOC_151622	42day_fully fed_2	0	0.380977
XLOC_073604	7day_DR_1	1.79165	0.698848
XLOC_073604	7day_DR_2	1.48755	2.8305
XLOC_073604	42day_DR_1	0.982141	0.74067
XLOC_073604	42day_DR_2	1.51421	0.597489
XLOC_073604	7day_fully fed_1	3.48484	1.87134
XLOC_073604	7day_fully fed_2	1.39902	2.34801
XLOC_073604	42day_fully fed_1	34.567	0.575922
XLOC_073604	42day_fully fed_2	1.36962	0.528908
XLOC_097475	7day_DR_1	2.41009	0.784009
XLOC_097475	7day_DR_2	1.89848	2.68294
XLOC_097475	42day_DR_1	1.26503	0.719874
XLOC_097475	42day_DR_2	1.81572	0.568293
XLOC_097475	7day_fully fed_1	1.7188	1.20088
XLOC_097475	7day_fully fed_2	1.74302	1.53256
XLOC_097475	42day_fully fed_1	4.73691	1.0645
XLOC_097475	42day_fully fed_2	2.65874	0.963083
XLOC_106174	7day_DR_1	0.301183	1.17019
XLOC_106174	7day_DR_2	0.540195	3.95206
XLOC_106174	42day_DR_1	0.190734	0.403458
XLOC_106174	42day_DR_2	0.211468	0.431837
XLOC_106174	7day_fully fed_1	0.128792	2.34862
XLOC_106174	7day_fully fed_2	0.130242	2.35386
XLOC_106174	42day_fully fed_1	0.124645	0.617991
XLOC_106174	42day_fully fed_2	0.141761	0.465606
XLOC_052958	7day_DR_1	0	1.50315
XLOC_052958	7day_DR_2	0	1.28266
XLOC_052958	42day_DR_1	0.900632	0.819561
XLOC_052958	42day_DR_2	0.983531	0.805031
XLOC_052958	7day_fully fed_1	0.87138	1.15168
XLOC_052958	7day_fully fed_2	3.6676	0.98337
XLOC_052958	42day_fully fed_1	0	0.742191
XLOC_052958	42day_fully fed_2	0	0.955802
XLOC_076307	7day_DR_1	0.0701281	0.697148
XLOC_076307	7day_DR_2	0.0743347	0.547355
XLOC_076307	42day_DR_1	0.288048	0.972684
XLOC_076307	42day_DR_2	0.640101	1.15071
XLOC_076307	7day_fully fed_1	0.0324687	0.570178
XLOC_076307	7day_fully fed_2	0.0328582	0.839401
XLOC_076307	42day_fully fed_1	0.188594	2.21443
XLOC_076307	42day_fully fed_2	0.142898	2.24962
XLOC_161301	7day_DR_1	0	1.90625
XLOC_161301	7day_DR_2	0	1.50153
XLOC_161301	42day_DR_1	0.88226	0.51502
XLOC_161301	42day_DR_2	0	0.676381
XLOC_161301	7day_fully fed_1	2.55918	1.62739
XLOC_161301	7day_fully fed_2	3.58882	1.41655
XLOC_161301	42day_fully fed_1	0	0.627786
XLOC_161301	42day_fully fed_2	3.7495	0.703462
XLOC_186922	7day_DR_1	0	1.10965
XLOC_186922	7day_DR_2	0	0.966829
XLOC_186922	42day_DR_1	0	0.69725
XLOC_186922	42day_DR_2	0	0.685626
XLOC_186922	7day_fully fed_1	2.85404	1.17495
XLOC_186922	7day_fully fed_2	0.747511	1.25958
XLOC_186922	42day_fully fed_1	0	1.18989
XLOC_186922	42day_fully fed_2	0.781884	1.15737
XLOC_000246	7day_DR_1	1.07241	1.99098
XLOC_000246	7day_DR_2	1.35312	1.6851
XLOC_000246	42day_DR_1	1.75975	0.536779
XLOC_000246	42day_DR_2	3.10749	0.665331
XLOC_000246	7day_fully fed_1	1.15907	2.19588
XLOC_000246	7day_fully fed_2	0.909127	1.82517
XLOC_000246	42day_fully fed_1	1.12639	0.525989
XLOC_000246	42day_fully fed_2	1.66621	0.400625
XLOC_000071	7day_DR_1	0.939672	2.11437
XLOC_000071	7day_DR_2	1.35558	2.20003
XLOC_000071	42day_DR_1	0.644323	0.457687
XLOC_000071	42day_DR_2	1.29713	0.459777
XLOC_000071	7day_fully fed_1	0.483608	1.68144
XLOC_000071	7day_fully fed_2	0.489142	1.70571
XLOC_000071	42day_fully fed_1	0.449346	0.631789
XLOC_000071	42day_fully fed_2	0.585481	0.566267
XLOC_009418	7day_DR_1	14.3651	1.81335
XLOC_009418	7day_DR_2	8.90174	2.09492
XLOC_009418	42day_DR_1	8.77627	0.443841
XLOC_009418	42day_DR_2	6.07024	0.667159
XLOC_009418	7day_fully fed_1	6.5867	1.68385
XLOC_009418	7day_fully fed_2	4.27417	1.92451
XLOC_009418	42day_fully fed_1	2.82003	0.512617
XLOC_009418	42day_fully fed_2	4.80177	0.551236
XLOC_056059	7day_DR_1	7.9392	1.39883
XLOC_056059	7day_DR_2	8.56538	1.55185
XLOC_056059	42day_DR_1	6.81494	0.949572
XLOC_056059	42day_DR_2	9.35749	0.996503
XLOC_056059	7day_fully fed_1	5.05424	0.69137
XLOC_056059	7day_fully fed_2	5.96387	0.735029
XLOC_056059	42day_fully fed_1	6.94659	1.08563
XLOC_056059	42day_fully fed_2	6.07493	0.903258

## Sheet: pvale of RNA-seq results
	7 day DR vs 72 day DR	7 day DR vs 7 day fully fed	42 day DR vs 42 day fully fed	7 day fully fed vs 42 day fully fed
Cp16	0.141234	0.0635023	0.724157	0.125604
Cp18	0.77797	0.154806	0.719355	0.35016
Cp19	0.0145366	0.0381728	0.461948	0.0917112
ems	0.609413	0.0604326	0.126956	4.17648e-05
Arr2	0.419494	0.000116799	0.100719	0.00300165
globin	0.0416489	0.000479531	0.11664	0.000301894
hairy	0.163686	0.782045	0.113813	0.227471
IscU	0.0109881	0.00977079	0.00324607	0.000640115
CG5999	0.435049	0.227439	0.648916	0.843316
PGRP-SC2	0.0444603	0.0133727	0.660228	0.742061
Socs36E	0.484242	0.617028	0.523862	0.568179
CG9733	0.156952	0.110993	0.418188	0.18986
Cyp6w1	0.000240955	0.00690954	0.0466584	0.0663928
CG11192	9.29208e-05	2.00891e-05	0.0627557	0.0167655
Gadd45	0.0976805	0.0143758	0.0914949	0.0177553
CG12374	0.000752738	0.0057453	0.00218827	0.0879731
CG9743	0.0148842	0.0400801	0.00110647	0.0157125
Amy-d	0.0666503	0.0168252	0.00230022	4.91408e-06
Hsc70-1	0.00629769	0.00629126	0.555544	0.000239718
Dip-B	0.807707	0.0175483	0.159155	0.910176
Gal	0.529738	0.168949	0.00291561	0.0141933
Hsc70-3	0.056193	0.000103681	0.0905832	0.000936285
Egfr	0.210034	0.0112592	0.0154833	0.27064
CG15046	0.0594063	0.343064	0.196522	0.00107085
CG17323	0.00687688	0.0220972	0.625352	0.338102
Pepck	6.16488e-05	0.00592943	0.00210726	0.0658424
Spat	0.000138713	0.0483511	0.0123448	0.000319337
CG13284	0.112953	0.00664447	0.00743313	0.00117589
SPH93	0.0989169	0.089663	0.114008	0.0617371
CG8740	0.00649546	0.20847	0.00385545	0.180416
Hsp70Bc	0.0681858	0.074033	0.146607	2.53673e-06
Cyp28d2	0.254015	0.0025782	0.0419763	0.0279204
PGRP-SC1a	0.00200785	0.163659	0.126042	0.0739193
CG31810	0.140133	0.00110768	0.158209	0.0880348
CG34383	0.296331	1.47936e-05	0.0950312	3.56914e-06
al-AA	0.466245	0.000737084	0.0793679	0.000433468
CG33970	0.690827	0.0047974	0.34499	0.0514781
Frq2	0.879573	0.111651	0.653757	0.154585
CG34384	0.138424	0.521594	0.179969	0.768751
nvd	0.00248024	0.162764	0.0133389	0.00931901
CG6048	0.0281134	0.0188165	0.00252732	0.0379518
δTry	0.000360123	0.846914	0.798286	0.00521117
CG8974	0.0461044	2.59084e-05	0.444584	0.00318749
CG15531	0.000234483	7.0212e-05	0.00769141	0.0119032
CR31781	0.158302	0.309648	0.158302	0.688108
Vha68-1	0.253635	0.000400326	0.961177	0.0169594
Cg25C	0.1207	0.00111863	0.600528	0.864242
αTry	0.109547	0.0340331	0.0126603	0.445885
5-HT1A	0.730339	0.648251	0.609101	0.00412464
ηTry	0.170901	0.0125549	0.611276	0.554934
Zyx	0.373901	0.373901	0.373901	0.373901
θTry	6.27425e-05	0.0329165	0.122755	0.0365481
ζTry	0.0331471	0.0322491	0.00758876	0.0526667
GstE12	0.0212762	0.00173224	0.0955721	0.0278877
ιTry	0.00370901	0.0298201	0.550832	0.366698
vkg	0.0174405	0.00073975	0.0114207	0.0174405
Ugt35b	0.0711534	0.0287415	0.00404926	0.0594028
inaC	0.0786555	0.0286582	0.115872	0.00680239
ash1	0.0711387	0.00869135	0.210051	0.718442
λTry	0.00430238	0.0165365	0.0185583	0.50116
GLS	0.0334716	0.0278524	0.125646	5.81844e-05
Pp2A-29B	0.000380931	5.87475e-05	0.0684445	0.00126723
CG9220	0.940959	0.00133555	0.0299078	0.0601164
εTry	0.00643117	0.0206943	0.280781	0.202717
XLOC_166557	0.00410981	2.89959e-07	0.00410981	2.89959e-07
XLOC_118356	0.0557302	0.140897	0.158302	0.00860996
XLOC_196039	/	0.0294345	0.0660184	2.864e-64
XLOC_201602	0.954581	0.43364	0.158302	0.243229
XLOC_007686	0.158302	0.828464	3.80691e-64	1.95335e-07
XLOC_009798	0.00744665	0.0169183	0.0117553	1.51159e-05
XLOC_010702	0.0085763	0.0196102	0.158302	0.957738
XLOC_059066	0.00220026	/	0.0146905	0.158302
XLOC_000043	0.00342704	0.000282004	0.00779681	0.197705
XLOC_002137	0.120339	0.0201875	0.397449	0.21666
XLOC_066439	5.20279e-06	0.158302	5.20279e-06	0.158302
XLOC_092363	/	0.00155072	/	0.00155072
XLOC_071213	0.0196049	0.0843045	0.0580401	0.0184023
XLOC_067962	0.158302	0.257616	/	0.0412013
XLOC_071173	0.019512	/	0.019512	/
XLOC_151622	/	0.000593517	/	0.000593517
XLOC_073604	0.0913676	0.257745	0.156016	0.181192
XLOC_097475	0.0473817	0.0457695	0.025438	0.0305459
XLOC_106174	0.033836	0.0134776	0.000940914	0.498561
XLOC_052958	2.48752e-06	0.0482402	2.48752e-06	0.0482402
XLOC_076307	0.0182193	5.38033e-06	0.0436324	0.000543193
XLOC_161301	0.158302	0.000493309	0.266801	0.345524
XLOC_186922	/	0.0415007	0.158302	0.0954333
XLOC_000246	0.0372189	0.174969	0.0685725	0.102585
XLOC_000071	0.472844	0.00530345	0.078102	0.474165
XLOC_009418	0.0749926	0.0223183	0.020282	0.139253
XLOC_056059	0.836858	0.0010023	0.112152	0.0511477

## Sheet: pvalue of qPCR results
	7 day DR vs 72 day DR	7 day DR vs 7 day fully fed	42 day DR vs 42 day fully fed	7 day fully fed vs 42 day fully fed
Cp16	1.20735e-06	0.00111152	0.0860852	0.0440795
Cp18	3.44769e-05	3.77095e-07	0.000241642	0.000153559
Cp19	0.000515058	0.000427553	0.572125	0.191718
ems	1.65129e-06	2.54425e-07	0.997211	0.000270898
Arr2	0.016788	0.355952	0.00121122	0.00084166
globin	0.191943	4.72883e-07	0.0969985	0.000443619
hairy	2.28756e-09	2.46765e-08	1.48159e-05	2.33048e-05
IscU	3.89163e-06	9.35046e-07	4.28505e-06	7.77721e-07
CG5999	9.29824e-05	0.000486688	0.000191565	0.00111551
PGRP-SC2	8.99297e-07	4.28363e-06	9.90446e-05	0.000234621
Socs36E	0.00137046	0.892853	0.54863	0.000617765
CG9733	0.000126188	4.89342e-05	1.42838e-05	1.16983e-05
Cyp6w1	3.0115e-05	3.96172e-05	3.73912e-05	6.77777e-05
CG11192	8.84021e-07	1.93298e-06	1.69227e-06	0.0503491
Gadd45	1.65531e-06	7.16343e-07	3.66869e-07	1.09192e-08
CG12374	5.25888e-06	5.39545e-06	2.43148e-05	4.88811e-05
CG9743	1.38447e-05	0.000134986	2.01502e-05	6.38972e-05
Amy-d	0.016788	0.355952	0.00121122	0.00084166
Hsc70-1	0.00137046	0.892853	0.54863	0.000617765
Dip-B	7.06553e-06	2.1215e-05	0.000126981	0.00505561
Gal	0.00488661	0.241487	1.78088e-05	7.25981e-06
Hsc70-3	0.336203	0.0542424	0.0189836	0.00414097
Egfr	0.0259335	0.0471396	0.0156526	0.0020265
CG15046	0.0666814	0.0611693	0.0356709	0.00297113
CG17323	0.0190315	0.0175543	0.0941655	0.0408746
Pepck	0.0426033	0.0304668	0.0020989	0.231431
Spat	0.0337343	0.0360197	0.00941463	0.00999704
CG13284	0.227835	0.111365	0.167733	0.825984
SPH93	0.0283803	0.254628	0.00154857	0.0405603
CG8740	0.0302119	0.00701233	0.00216683	0.148618
Hsp70Bc	0.0462288	0.0456142	0.00533267	0.00683762
Cyp28d2	0.0543565	0.0979975	0.25276	0.151349
PGRP-SC1a	0.00597552	0.0133044	0.258591	9.52388e-05
CG31810	0.020033	0.00024363	0.943664	0.324715
CG34383	0.00192448	0.00013444	0.0333789	0.166737
al-AA	1.55221e-05	7.24173e-07	0.862045	0.721224
CG33970	0.00604308	0.00912063	0.619199	0.555007
Frq2	0.00706392	0.00479743	0.00511256	0.0294338
CG34384	0.0275889	0.0114046	0.00624199	0.0546677
nvd	0.0217388	0.00215058	0.0074376	0.521694
CG6048	0.000186933	0.00013102	8.31557e-05	0.000295584
δTry	0.311275	0.714003	0.724448	0.722613
CG8974	0.011226	0.012362	0.0191257	0.805959
CG15531	0.0253866	0.000428173	0.111235	0.228471
CR31781	0.719447	0.201859	0.00394701	0.357656
Vha68-1	0.727201	0.454072	0.0510172	0.0220947
Cg25C	0.0649521	0.0160594	0.976403	0.302561
αTry	0.370231	0.117682	0.0300084	0.177149
5-HT1A	0.00281229	0.00720458	0.00196134	0.000908036
ηTry	0.0142191	0.157836	0.150397	0.958536
Zyx	0.000657459	0.025747	0.642058	0.0504626
θTry	0.00774645	0.247194	0.517501	0.118997
ζTry	0.020993	0.203134	0.692996	0.480175
GstE12	0.826159	0.00251807	0.00932481	0.00918113
ιTry	0.289553	0.00171797	0.0768542	0.842645
vkg	0.74478	0.523525	0.0923797	0.314249
Ugt35b	0.192093	0.527167	0.035569	0.186283
inaC	0.031331	0.0539896	0.0118703	0.00145748
ash1	0.725879	0.203301	0.0297401	0.179404
λTry	0.0417704	0.0935531	0.259864
GLS	0.0702102	0.0177916	0.0428289	0.000629416
Pp2A-29B	0.104547	0.144966	0.100776	0.234902
CG9220	0.807274	0.00981242	0.0563777	0.275011
εTry	0.0938446	0.767482	0.138093	0.960097
XLOC_166557	0.0769567	0.000390766	0.000333555	0.00555626
XLOC_118356	9.68786e-05	0.000142974	0.00283522	0.000224464
XLOC_196039	1.26918e-05	4.30449e-05	0.198916	1.68528e-05
XLOC_201602	4.01576e-06	0.000408444	0.00469973	0.00145642
XLOC_007686	2.64944e-08	1.23877e-07	2.23869e-05	4.45337e-06
XLOC_009798	9.14056e-06	3.03738e-06	9.40693e-07	0.000276154
XLOC_010702	3.79986e-08	8.08221e-07	0.0054016	2.42499e-05
XLOC_059066	1.76956e-05	4.55484e-05	0.000103231	0.000158461
XLOC_000043	9.73563e-07	0.000160669	6.04447e-06	0.0069672
XLOC_002137	0.00588551	0.00705951	0.00044963	0.000953586
XLOC_066439	5.36956e-05	0.00369473	0.000115737	0.0376913
XLOC_092363	0.00178041	0.00287606	0.130469	0.00288714
XLOC_071213	0.00110443	0.00229586	1.20947e-08	0.00120921
XLOC_067962	0.00192343	0.00651516	0.111395	0.000663376
XLOC_071173	0.00456521	0.0114185	0.084723	0.00300365
XLOC_151622	0.000164152	0.000744067	0.320211	3.48665e-05
XLOC_073604	0.150309	0.613376	0.0551301	0.000354103
XLOC_097475	0.118665	0.545864	0.00216626	0.0243414
XLOC_106174	0.0558635	0.806717	0.0500962	2.09266e-06
XLOC_052958	0.000807939	0.0153047	0.584596	0.0496351
XLOC_076307	0.00282021	0.405918	2.3767e-05	4.09014e-05
XLOC_161301	0.000915514	0.239436	0.245704	0.000187895
XLOC_186922	0.00110737	0.0201992	1.09395e-06	0.170813
XLOC_000246	0.000207337	0.281673	0.056539	0.000164622
XLOC_000071	2.69498e-07	5.55159e-05	0.00176643	6.90294e-07
XLOC_009418	0.000175144	0.23343	0.736824	5.50007e-05
XLOC_056059	0.000406397	7.73082e-05	0.713845	0.00653687
