# Supplementary material for: LncRNA mediated regulation of aging pathways in Drosophila melanogaster during dietary restriction
Source: Aging (Albany NY). 2016 Sep 27;8(9):2182–97. doi: 10.18632/aging.101062 (PMC5076457; doi:10.18632/aging.101062)
Supplement: Supplementary file 6 [file aging-08-2182-s006.xls]

## Sheet: 7 day vs 42 day in DR
transcript_id	gene_id	gene_name	length	7_day_DR_FPKM	7_day_fully fed_FPKM	log2(foldchange)	pvalue	qvalue
FBtr0333190	FBgn0037664	-	1343	0.317014	0.529049	-0.738854	0.7626	0.999568
FBtr0332112	FBgn0040308	-	1007	0.0793818	0.382522	-2.26866	1	1
FBtr0333191	FBgn0038181	-	4111	0.761061	0	inf	0.11475	0.999568
FBtr0077629	FBgn0031478	-	1785	63.8066	63.819	-0.000281106	0.9988	0.999573
FBtr0077628	FBgn0031476	-	998	1.59942	1.14036	0.488066	0.8898	0.999568
TCONS_00244019	XLOC_068108	-	219	0.516727	0	inf	1	1
FBtr0077623	FBgn0015521	-	619	4.00306	4.69917	-0.231302	0.94025	0.999568
FBtr0077622	FBgn0015521	-	415	1.50727	1.27024	0.246838	0.5353	0.999568
FBtr0077621	FBgn0015521	-	391	1975.28	1559.65	0.34083	1	1
FBtr0077627	FBgn0031474	-	2889	2.08992	2.11708	-0.0186273	0.98075	0.999568
FBtr0077626	FBgn0031474	-	2998	24.3256	25.0558	-0.0426654	0.846	0.999568
FBtr0077625	FBgn0031474	-	3088	2.87103	4.21916	-0.555387	0.3643	0.999568
FBtr0072052	FBgn0034834	-	1410	0.0862802	0.0783446	0.139196	1	1
FBtr0072051	FBgn0040063	-	788	0.1402	0.0792016	0.823883	1	1
FBtr0072050	FBgn0040063	-	1249	0.0364845	0.0301446	0.275388	1	1
FBtr0072057	FBgn0034870	-	870	0.460571	0.32735	0.492589	0.4809	0.999568
FBtr0072056	FBgn0034869	-	1052	0.040737	0.147581	-1.8571	1	1
TCONS_00008305	XLOC_005893	-	201	0	0	0	1	1
FBtr0072059	FBgn0041234	-	1221	0.358951	0.231572	0.632328	1	1
FBtr0072058	FBgn0261786	-	3845	26.2013	32.9076	-0.328782	0.10165	0.999568
FBtr0088225	FBgn0029134	-	1139	281.882	276.386	0.0284071	0.87825	0.999568
FBtr0088224	FBgn0029134	-	1076	6.72715	8.79091	-0.386016	0.76445	0.999568
FBtr0088227	FBgn0033557	-	3220	28.7697	29.5533	-0.0387689	1	1
FBtr0088226	FBgn0033555	-	724	61.8359	55.8689	0.146401	0.5061	0.999568
FBtr0088221	FBgn0033547	-	1200	0.125185	0.733112	-2.54997	0.39695	0.999568
FBtr0088223	FBgn0033551	-	1523	50.6749	51.4206	-0.0210751	0.91595	0.999568
FBtr0088222	FBgn0033549	-	1138	36.1964	40.2197	-0.152058	0.54345	0.999568
FBtr0088228	FBgn0263510	-	1549	50.1628	42.7946	0.22919	0.254	0.999568
TCONS_00091941	XLOC_032088	-	222	1.42605	1.28994	0.144721	1	1
FBtr0308321	FBgn0023531	-	6762	1.33375	1.23164	0.114908	0.8369	0.999568
FBtr0308320	FBgn0029587	-	3151	0.440632	0.407591	0.112451	0.9428	0.999568
FBtr0308323	FBgn0023531	-	6713	0.109529	0	inf	1	1
FBtr0308322	FBgn0023531	-	3799	0.105158	0.194552	-0.887603	1	1
FBtr0308325	FBgn0002873	-	7938	15.4353	19.6489	-0.348218	0.2103	0.999568
FBtr0308324	FBgn0023531	-	6806	0	0.158253	#NAME?	1	1
FBtr0308327	FBgn0002873	-	8457	0	0.000215435	#NAME?	1	1
FBtr0308326	FBgn0002873	-	6286	0.0569223	0.048943	0.21789	1	1
FBtr0308329	FBgn0002873	-	7097	0.217341	0.429826	-0.983791	0.7339	0.999568
FBtr0308328	FBgn0002873	-	8643	7.69811	10.5414	-0.453483	0.23175	0.999568
TCONS_00960819	XLOC_188047	-	204	2.10971	0.661658	1.67289	1	1
TCONS_00212738	XLOC_057649	-	202	0	0.65857	#NAME?	1	1
TCONS_00003463	XLOC_001635	-	464	0.644536	0.523038	0.301346	0.71965	0.999568
FBtr0085138	FBgn0003495	-	2050	7.19403	7.71915	-0.101643	0.7892	0.999568
FBtr0085139	FBgn0003495	-	1909	1.65889	1.59612	0.0556507	0.95245	0.999568
FBtr0085132	FBgn0039487	-	2635	8.86665	9.52256	-0.10296	0.7026	0.999568
FBtr0085133	FBgn0039486	-	1130	10.8915	6.31634	0.786048	0.0084	0.497266
FBtr0085130	FBgn0039491	-	2897	0.25821	0.193353	0.41731	1	1
FBtr0085131	FBgn0039488	-	1556	23.0755	27.4751	-0.251761	0.2482	0.999568
FBtr0085136	FBgn0039480	-	1514	0.0917279	0.0638628	0.522385	1	1
FBtr0085137	FBgn0003495	-	2128	2.84412	2.84997	-0.00296501	0.9968	0.999568
FBtr0085135	FBgn0039481	-	1054	1.00658	0.825949	0.285343	0.5672	0.999568
FBtr0332234	FBgn0262475	-	4146	0	0.170346	#NAME?	1	1
TCONS_00952124	XLOC_210443	-	214	1.73664	1.00155	0.794064	1	1
Novel000069.1	Novel000069	-	212	1.21328	0	inf	1	1
FBtr0333107	FBgn0260442	-	9521	0	0.193735	#NAME?	1	1
FBtr0073015	FBgn0035372	-	1296	43.1533	39.6698	0.121428	0.55335	0.999568
FBtr0073016	FBgn0035371	-	3020	18.3969	19.7074	-0.0992717	0.6267	0.999568
FBtr0333104	FBgn0264510	-	1258	0.756788	0.831551	-0.135915	0.95725	0.999568
FBtr0073010	FBgn0035380	-	1631	0.133528	0.186996	-0.485862	1	1
FBtr0073011	FBgn0035379	-	1996	0.66522	0.473918	0.489193	0.30545	0.999568
FBtr0309056	FBgn0033958	-	4422	1.59219	1.00822	0.659197	0.13625	0.999568
FBtr0309057	FBgn0263376	-	1665	0.131136	0.118502	0.146153	1	1
FBtr0333109	FBgn0260442	-	9722	1.53144	0.238474	2.68298	0.2997	0.999568
FBtr0333108	FBgn0260442	-	9265	0.782275	0.922505	-0.237882	0.86575	0.999568
FBtr0303755	FBgn0038508	-	710	0.473551	0.337747	0.487578	0.51835	0.999568
FBtr0303757	FBgn0027596	-	5340	3.57345	2.5238	0.501722	0.2014	0.999568
FBtr0303756	FBgn0027596	-	4522	1.45022	0.850153	0.770477	0.25985	0.999568
FBtr0303751	FBgn0261934	-	3009	4.86985	5.99783	-0.300563	0.46435	0.999568
FBtr0303750	FBgn0261934	-	11586	0.691795	0.767374	-0.149586	0.8191	0.999568
FBtr0303759	FBgn0033984	-	3841	18.1843	21.0997	-0.214524	0.29425	0.999568
FBtr0303758	FBgn0027596	-	1942	0.653641	0.555501	0.234708	0.8808	0.999568
FBtr0332110	FBgn0024806	-	5914	0	0.15937	#NAME?	1	1
FBtr0345678	FBgn0004055	-	4114	0.273089	0.307729	-0.172286	1	1
FBtr0110942	FBgn0028931	-	2184	4.03578	4.90233	-0.28062	0.3464	0.999568
FBtr0110941	FBgn0028539	-	5141	32.3487	33.804	-0.06349	0.7981	0.999568
FBtr0110947	FBgn0083973	-	892	0.00490398	0.00972471	-0.987703	1	1
FBtr0110944	FBgn0083972	-	706	13.2534	9.44797	0.48829	0.6582	0.999568
FBtr0345670	FBgn0266861	-	700	0.135944	0.218415	-0.684059	1	1
FBtr0081259	FBgn0032814	-	2062	13.5453	15.5246	-0.196764	0.385	0.999568
FBtr0081258	FBgn0027949	-	1366	46.7278	53.7602	-0.202258	0.36805	0.999568
FBtr0345671	FBgn0266862	-	641	0.115936	0.175553	-0.598587	1	1
FBtr0081253	FBgn0003231	-	2305	178.144	167.169	0.0917359	1	1
FBtr0081252	FBgn0032804	-	703	0.166413	0.0311976	2.41526	1	1
FBtr0081251	FBgn0032803	-	1316	1.41216	1.02869	0.457095	0.3037	0.999568
FBtr0081250	FBgn0051697	-	657	0.927709	0.680535	0.447003	0.876	0.999568
FBtr0081257	FBgn0032810	-	1146	1.24871	1.02134	0.289967	0.71455	0.999568
FBtr0081256	FBgn0032809	-	910	3.32624	2.30806	0.52721	0.21235	0.999568
FBtr0081254	FBgn0041180	-	4694	33.4048	24.9399	0.4216	0.05665	0.999568
FBtr0345673	FBgn0001269	-	4776	0.153187	0.075857	1.01394	1	1
FBtr0345674	FBgn0050489	-	4482	0.31378	0.271925	0.206547	1	1
FBtr0345675	FBgn0040765	-	3037	0	0.0343375	#NAME?	1	1
FBtr0074549	FBgn0030900	-	920	0.312121	0.152713	1.03128	1	1
FBtr0345676	FBgn0034470	-	922	0.48803	0.481535	0.0193295	0.9086	0.999568
FBtr0334601	FBgn0039186	-	2592	0.84382	1.67979	-0.993274	0.3977	0.999568
FBtr0074540	FBgn0030883	-	843	32.6861	30.4868	0.100491	0.6713	0.999568
FBtr0074546	FBgn0083228	-	2397	0.31322	0.143688	1.12424	1	1
FBtr0074545	FBgn0030897	-	5686	0.000479948	0.100482	-7.70984	1	1
FBtr0074544	FBgn0030877	-	2289	28.0784	31.9039	-0.184268	0.3804	0.999568
TCONS_00090156	XLOC_028051	-	289	3.07991	2.58572	0.252326	0.9174	0.999568
TCONS_00090155	XLOC_028049	-	221	2.38901	2.13126	0.164709	0.6687	0.999568
FBtr0333173	FBgn0035094	-	2668	4.94914	3.14631	0.653519	0.41725	0.999568
FBtr0334609	FBgn0038975	-	6583	0.0565489	0.216136	-1.93437	1	1
FBtr0086860	FBgn0034264	-	1402	0.866825	0.667547	0.37687	0.8422	0.999568
TCONS_00264388	XLOC_066405	-	249	0	1.05634	#NAME?	0.22975	0.999568
TCONS_00218199	XLOC_065917	-	320	0.539064	0.124715	2.11183	1	1
TCONS_00949096	XLOC_205480	-	743	1.45832	0.765	0.930772	0.4794	0.999568
FBtr0300518	FBgn0267337	-	5014	0.0962365	0.121565	-0.337071	1	1
FBtr0305494	FBgn0029858	-	2809	0.171216	0.109075	0.650494	1	1
FBtr0305495	FBgn0028685	-	1465	122.825	128.926	-0.0699373	0.73255	0.999568
FBtr0305496	FBgn0262631	-	710	0.629943	0.795433	-0.336519	1	1
FBtr0305497	FBgn0026086	-	2042	17.6286	21.5736	-0.291349	0.448	0.999568
FBtr0305490	FBgn0040510	-	3539	0.000432589	0.000408665	0.0820767	1	1
FBtr0305491	FBgn0040510	-	3549	0.000114043	0.000116759	-0.0339576	1	1
TCONS_00485049	XLOC_118356	-	200	2.45313	4.35606	-0.8284	0.4931	0.999568
FBtr0305498	FBgn0026086	-	2839	2.65039	1.76947	0.58289	0.606	0.999568
FBtr0305499	FBgn0026086	-	6954	1.04504	1.14736	-0.134764	0.8788	0.999568
FBtr0112516	FBgn0085346	-	1168	45.0304	41.682	0.111473	0.624	0.999568
FBtr0112514	FBgn0085345	-	907	0.294013	0.288124	0.0291877	1	1
TCONS_00307364	XLOC_047731	-	1370	0.214122	0.214999	-0.00590101	1	1
FBtr0112519	FBgn0016053	-	686	650.156	662.133	-0.0263347	0.8951	0.999568
FBtr0332116	FBgn0052311	-	9761	1.7334	1.75695	-0.0194694	0.9657	0.999568
FBtr0305148	FBgn0031155	-	1226	0.115121	0.168443	-0.549107	1	1
FBtr0305149	FBgn0262735	-	3468	5.86856	6.24058	-0.0886736	0.85455	0.999568
FBtr0305147	FBgn0266848	-	3283	1.21634	1.41347	-0.216693	0.87025	0.999568
FBtr0305145	FBgn0053196	-	26263	0.306342	0.464989	-0.602052	0.3399	0.999568
FBtr0305142	FBgn0053196	-	48068	0.269658	0.181208	0.573482	1	1
FBtr0305141	FBgn0053196	-	47440	0	0	0	1	1
FBtr0309872	FBgn0052707	-	2605	7.18474	9.4299	-0.392306	0.2576	0.999568
FBtr0309873	FBgn0004646	-	2158	2.95249	2.83884	0.0566306	0.9296	0.999568
FBtr0309871	FBgn0030082	-	1493	3.33929	3.55562	-0.0905577	0.9161	0.999568
FBtr0309874	FBgn0004646	-	2794	0.0202777	0	inf	1	1
FBtr0309875	FBgn0004646	-	1689	0	0	0	1	1
FBtr0085961	FBgn0032987	-	614	4204.76	3562.27	0.239227	1	1
FBtr0309878	FBgn0030440	-	717	0.0323679	0.12148	-1.90809	1	1
FBtr0309879	FBgn0033447	-	3569	1.61e-06	0.000157999	-6.61885	1	1
FBtr0085964	FBgn0032979	-	2636	83.5983	89.7822	-0.102956	0.6759	0.999568
FBtr0085966	FBgn0033047	-	1802	9.48847	9.15738	0.0512392	1	1
FBtr0300516	FBgn0259170	-	3808	3.61178	4.70435	-0.381286	0.49335	0.999568
TCONS_00038793	XLOC_014300	-	200	0	0	0	1	1
FBtr0300514	FBgn0259170	-	3961	2.97446	3.41467	-0.199119	0.7516	0.999568
FBtr0300515	FBgn0259170	-	3853	1.39875	1.16179	0.267793	0.7878	0.999568
FBtr0300512	FBgn0259170	-	3710	0	0	0	1	1
FBtr0300513	FBgn0259170	-	3785	3.30474	3.30429	0.000196867	0.9984	0.999568
FBtr0300510	FBgn0259168	-	4228	0.483285	0.399134	0.275999	0.91085	0.999568
FBtr0300511	FBgn0259170	-	4132	7.08116	7.23098	-0.0302062	0.93755	0.999568
FBtr0089636	FBgn0031883	-	2457	11.3769	11.7	-0.0404105	0.9627	0.999568
FBtr0089631	FBgn0016034	-	1839	0.353561	0.978205	-1.46818	0.4934	0.999568
FBtr0089630	FBgn0034289	-	1991	76.5173	39.8268	0.942046	5e-05	0.0107714
FBtr0089633	FBgn0016034	-	1759	3.00391	2.7153	0.145727	0.8708	0.999568
FBtr0089632	FBgn0016034	-	1830	31.4328	35.2211	-0.164171	1	1
FBtr0301645	FBgn0035504	-	2732	0.297469	0.299525	-0.00993784	1	1
FBtr0301644	FBgn0025790	-	1930	0.519234	0.711334	-0.454142	0.78035	0.999568
FBtr0301647	FBgn0032707	-	2611	0	9.43e-06	#NAME?	1	1
FBtr0083490	FBgn0038533	-	1134	26.4675	26.3346	0.00726321	0.98525	0.999568
FBtr0301640	FBgn0041707	-	1148	0.272155	0.327864	-0.268666	1	1
FBtr0301643	FBgn0025790	-	2159	6.15622	6.75077	-0.133008	0.7853	0.999568
FBtr0083498	FBgn0038529	-	914	0.122025	0.153705	-0.33298	1	1
FBtr0301649	FBgn0037502	-	1878	0.0302581	0.0282456	0.0992971	1	1
FBtr0301648	FBgn0034921	-	1225	6.17419	3.15465	0.968768	1	1
FBtr0079883	FBgn0032166	-	4136	0.926632	0.817077	0.181526	0.8726	0.999568
FBtr0079885	FBgn0032170	-	2323	0	0	0	1	1
FBtr0079884	FBgn0032169	-	1602	19.795	22.7963	-0.203668	1	1
FBtr0079887	FBgn0032170	-	2224	27.2535	24.3483	0.162621	0.69765	0.999568
FBtr0079886	FBgn0032170	-	2250	7.40169	8.69823	-0.232867	0.75415	0.999568
FBtr0079889	FBgn0015664	-	2872	17.4575	19.8671	-0.186538	0.5652	0.999568
FBtr0079888	FBgn0011272	-	791	58.7317	57.9608	0.0190608	0.98375	0.999568
TCONS_00267125	XLOC_071472	-	213	2.3354	0	inf	0.1021	0.999568
FBtr0333930	FBgn0038858	-	1601	0.907545	0.903546	0.00637226	0.9923	0.999568
FBtr0091914	FBgn0053910	-	595	0	0	0	1	1
FBtr0091916	FBgn0053912	-	498	0	0.0521466	#NAME?	1	1
FBtr0091911	FBgn0053907	-	412	1.5846	2.15528	-0.443753	0.442	0.999568
FBtr0091910	FBgn0053906	-	595	0	0	0	1	1
FBtr0091913	FBgn0053909	-	413	0	0	0	1	1
FBtr0091912	FBgn0053908	-	595	0	0	0	1	1
FBtr0100187	FBgn0000056	-	2024	0	0.00380711	#NAME?	1	1
FBtr0100186	FBgn0035538	-	3834	0.149189	0.23095	-0.630442	1	1
FBtr0100185	FBgn0035538	-	4288	0.416299	0.444798	-0.095531	0.87685	0.999568
FBtr0100184	FBgn0027339	-	4749	0	0	0	1	1
FBtr0100183	FBgn0004907	-	1753	242.637	198.945	0.286429	1	1
FBtr0100182	FBgn0004907	-	974	187.506	176.023	0.0911769	1	1
FBtr0100188	FBgn0045500	-	1161	0.0537031	0.0326971	0.715842	1	1
FBtr0346527	FBgn0035667	-	951	0.387224	0.34692	0.158565	0.91765	0.999568
FBtr0084618	FBgn0039200	-	750	1.31784	0.950666	0.471159	0.39515	0.999568
FBtr0084611	FBgn0053340	-	1152	0.0740468	0.198415	-1.42202	1	1
FBtr0084613	FBgn0053341	-	946	0.0451107	0.168587	-1.90195	1	1
FBtr0084614	FBgn0039194	-	1047	0.162707	0.203686	-0.324073	1	1
FBtr0084617	FBgn0039199	-	1139	0.0560284	0.0500844	0.161799	1	1
FBtr0082722	FBgn0038105	-	1462	13.1044	12.5813	0.058775	0.815	0.999568
FBtr0082723	FBgn0041710	-	1439	1.83087	1.43253	0.353967	0.84865	0.999568
FBtr0345500	FBgn0034763	-	2242	1.27857	1.89435	-0.567172	0.5369	0.999568
FBtr0082721	FBgn0038107	-	707	82.9949	90.178	-0.119752	1	1
FBtr0082726	FBgn0038098	-	2913	0	0.0798084	#NAME?	1	1
FBtr0082727	FBgn0038098	-	2606	91.2006	56.4817	0.691258	0.00075	0.0909587
FBtr0082724	FBgn0038102	-	1136	0.408236	0.923713	-1.17804	0.6871	0.999568
FBtr0345505	FBgn0040091	-	1864	1.72137	1.56772	0.134889	0.8056	0.999568
FBtr0345508	FBgn0026872	-	1474	1.30863	1.06717	0.294269	0.73675	0.999568
FBtr0345509	FBgn0025391	-	2972	0.430068	0.000226918	10.8882	0.0667	0.999568
TCONS_00651723	XLOC_152713	-	203	0.722707	1.92237	-1.41141	1	1
FBtr0100459	FBgn0261278	-	1649	0	0	0	1	1
FBtr0100451	FBgn0053155	-	725	3.32885	1.74656	0.930505	0.75215	0.999568
FBtr0100453	FBgn0053155	-	942	0.885302	0.636943	0.475007	0.8632	0.999568
FBtr0100455	FBgn0001235	-	2462	2.73536	2.11508	0.371017	1	1
FBtr0100454	FBgn0001235	-	3868	0.402475	0.283091	0.507632	0.67605	0.999568
FBtr0100457	FBgn0016917	-	3616	6.14985	6.04245	0.025417	0.97725	0.999568
FBtr0100456	FBgn0032365	-	1515	0.0324296	0.0517162	-0.673304	1	1
FBtr0075155	FBgn0036769	-	1519	43.9717	38.7503	0.182367	0.53635	0.999568
FBtr0346086	FBgn0030620	-	1082	1.74e-05	3.22e-05	-0.888546	1	1
FBtr0346087	FBgn0030600	-	16734	2.84373	2.44244	0.219465	0.6347	0.999568
FBtr0346084	FBgn0267086	-	333	4.30199	2.23817	0.942688	0.119	0.999568
FBtr0346085	FBgn0053178	-	825	0.727971	0.607097	0.261954	0.8582	0.999568
FBtr0346082	FBgn0030930	-	3668	1.58609	0.902166	0.814013	0.45975	0.999568
FBtr0346083	FBgn0030933	-	1532	0.000129604	0.211007	-10.669	1	1
FBtr0346080	FBgn0267084	-	1219	0.431843	0.262328	0.719137	0.8144	0.999568
FBtr0346081	FBgn0267085	-	515	0.266529	0.195205	0.449304	1	1
FBtr0346088	FBgn0015773	-	3339	0.512998	0.000116511	12.1043	0.06995	0.999568
FBtr0346089	FBgn0030529	-	1349	86.7292	78.3805	0.146024	1	1
FBtr0331336	FBgn0263220	-	8450	0.44746	0.427818	0.0647618	0.90195	0.999568
FBtr0331334	FBgn0028527	-	2004	0.640051	0.00071616	9.80369	0.1809	0.999568
FBtr0331332	FBgn0028527	-	2404	0.39302	0.293137	0.423025	0.7641	0.999568
FBtr0331333	FBgn0028527	-	2041	1.15493	0.991993	0.219403	0.8355	0.999568
FBtr0331330	FBgn0041180	-	4723	0.369408	0.332878	0.150223	0.94715	0.999568
FBtr0331331	FBgn0264845	-	3555	0.0937296	0.131941	-0.493318	1	1
TCONS_00649078	XLOC_149064	-	201	2.38348	0.719638	1.72772	0.47765	0.999568
FBtr0070639	FBgn0026084	-	896	159.369	192.573	-0.273039	0.2049	0.999568
FBtr0070638	FBgn0000221	-	1450	13.5099	15.1907	-0.169179	0.4943	0.999568
FBtr0079719	FBgn0263852	-	526	99.2629	90.4509	0.13412	0.5881	0.999568
FBtr0330064	FBgn0035715	-	1506	1.1865	0.764255	0.634591	0.75545	0.999568
FBtr0330067	FBgn0024150	-	6417	0.332104	0.510768	-0.621034	0.4349	0.999568
FBtr0330066	FBgn0024150	-	6206	0.522496	0.517204	0.0146876	0.97955	0.999568
FBtr0330061	FBgn0035715	-	1554	2.72588	2.76928	-0.0227855	0.98245	0.999568
FBtr0330060	FBgn0035714	-	882	56.9606	54.8729	0.0538693	1	1
FBtr0330063	FBgn0035715	-	1491	5.55077	4.68236	0.245454	0.76065	0.999568
FBtr0330062	FBgn0035715	-	1542	7.17881	6.74232	0.0905004	0.8954	0.999568
FBtr0079711	FBgn0014417	-	2741	7.09013	3.71626	0.931963	0.51635	0.999568
FBtr0079710	FBgn0032042	-	2774	14.0936	14.0283	0.00669739	1	1
FBtr0079713	FBgn0040959	-	361	195.565	119.461	0.711114	0.00315	0.258052
FBtr0079712	FBgn0001084	-	1688	0.499875	0.227409	1.13628	0.64765	0.999568
FBtr0079715	FBgn0040098	-	792	0.0283459	0.0793608	-1.48529	1	1
FBtr0079714	FBgn0040958	-	337	1.94892	0.9705	1.00587	1	1
FBtr0079716	FBgn0015583	-	767	0.184603	0.110537	0.739896	1	1
FBtr0307179	FBgn0052792	-	1822	0	0.0236186	#NAME?	1	1
FBtr0307178	FBgn0005411	-	1473	120.377	123.507	-0.037036	1	1
FBtr0307175	FBgn0086448	-	1573	16.2524	15.6009	0.0590205	1	1
FBtr0307174	FBgn0086129	-	1972	4.35613	5.04674	-0.212304	0.7916	0.999568
FBtr0307177	FBgn0005411	-	1371	3.10124	3.64241	-0.232048	0.86305	0.999568
FBtr0307176	FBgn0005411	-	1344	3.20894	4.95338	-0.626315	0.6134	0.999568
FBtr0307171	FBgn0032338	-	2350	0.0301745	0.000562204	5.7461	1	1
FBtr0307170	FBgn0035482	-	1859	8.49854	7.97237	0.0922059	0.8083	0.999568
FBtr0307173	FBgn0260400	-	10506	1.11828	0.913988	0.291038	0.5591	0.999568
FBtr0307172	FBgn0039970	-	1145	91.7961	70.7579	0.375541	0.1953	0.999568
TCONS_00667911	XLOC_176897	-	214	0.578494	2.97412	-2.36209	0.1642	0.999568
FBtr0343108	FBgn0032700	-	2418	0.769181	0.242747	1.66387	0.5876	0.999568
FBtr0343109	FBgn0032701	-	1870	1.19047	1.01835	0.225296	0.90165	0.999568
FBtr0343104	FBgn0265995	-	433	0.361606	0.131277	1.4618	1	1
FBtr0343105	FBgn0028888	-	6080	0.201964	0.196029	0.0430306	1	1
FBtr0343106	FBgn0265996	-	619	0.208813	0.148856	0.488301	1	1
FBtr0343107	FBgn0265997	-	237	0.710963	0.323294	1.13693	0.1555	0.999568
FBtr0343100	FBgn0036402	-	2573	4.20483	3.80611	0.143729	0.8715	0.999568
FBtr0343101	FBgn0039145	-	702	8.18313	9.93379	-0.279691	0.79095	0.999568
FBtr0343102	FBgn0264906	-	549	0.438878	0.880995	-1.00531	0.73665	0.999568
FBtr0333177	FBgn0259677	-	7849	0.236595	0.374044	-0.66079	1	1
FBtr0289989	FBgn0003386	-	2428	0.114237	0.0411747	1.4722	1	1
FBtr0289988	FBgn0015519	-	3908	0.0693514	0.0982658	-0.502764	1	1
FBtr0289985	FBgn0034085	-	4589	10.3141	7.56612	0.446992	0.03705	0.999568
FBtr0289986	FBgn0042126	-	1804	0.33838	0.245568	0.462521	1	1
FBtr0289981	FBgn0032475	-	4846	2.43192	1.69645	0.519574	0.5507	0.999568
FBtr0289983	FBgn0035581	-	1656	0.0354672	0.0352463	0.00901357	1	1
FBtr0289982	FBgn0035581	-	13807	0.0744542	0.0940473	-0.337034	1	1
TCONS_00709431	XLOC_138531	-	234	1.47186	0	inf	1	1
FBtr0076772	FBgn0003041	-	5047	8.03531	10.9943	-0.452331	0.2123	0.999568
FBtr0076773	FBgn0003041	-	3311	0.975363	0.598835	0.703781	0.671	0.999568
FBtr0076770	FBgn0035825	-	1340	24.9989	26.7159	-0.0958359	0.70215	0.999568
FBtr0076771	FBgn0003041	-	3673	29.6151	31.5398	-0.0908411	0.69635	0.999568
FBtr0076776	FBgn0016694	-	5065	0	0	0	1	1
FBtr0076777	FBgn0016694	-	5107	0.354397	0.404494	-0.190755	0.88925	0.999568
FBtr0076774	FBgn0003041	-	4685	0.623008	0.625676	-0.00616579	0.9971	0.999568
FBtr0076775	FBgn0016694	-	2828	1.41851	1.3904	0.0288706	0.97505	0.999568
Novel000167.1	Novel000167	-	1094	0.54262	0.508989	0.0923092	0.96145	0.999568
FBtr0340453	FBgn0034420	-	3536	3.42635	1.71001	1.00267	0.171	0.999568
FBtr0340452	FBgn0034420	-	3109	1.19813	0.812078	0.561096	0.6675	0.999568
FBtr0340451	FBgn0034420	-	3154	5.21991	3.48509	0.582829	0.306	0.999568
FBtr0340450	FBgn0000578	-	4417	3.46023	3.78061	-0.127753	0.7399	0.999568
FBtr0340457	FBgn0034417	-	2191	3.70561	2.68297	0.465878	0.275	0.999568
FBtr0340456	FBgn0263395	-	4228	7.37572	8.4146	-0.190111	0.55275	0.999568
FBtr0071278	FBgn0011661	-	2401	59.3683	60.8659	-0.0359425	0.91445	0.999568
FBtr0071279	FBgn0026411	-	3081	0.35405	0.299941	0.239276	0.692	0.999568
FBtr0071276	FBgn0011661	-	2236	0.0755001	0.0750073	0.00944924	1	1
FBtr0071277	FBgn0011661	-	2282	3.63411	2.17384	0.741355	0.67935	0.999568
FBtr0071274	FBgn0011661	-	2919	34.7428	35.4614	-0.0295339	0.94385	0.999568
FBtr0071275	FBgn0011661	-	2295	38.2707	42.763	-0.160122	0.7136	0.999568
FBtr0071272	FBgn0011661	-	2027	0.247305	0.501818	-1.02088	0.7341	0.999568
FBtr0071273	FBgn0011661	-	2283	1.87183	1.59975	0.226605	0.92675	0.999568
FBtr0071270	FBgn0011661	-	2462	0.926683	0.853387	0.118877	0.9679	0.999568
FBtr0071271	FBgn0011661	-	2353	0.0528479	0.0443061	0.254342	1	1
FBtr0337048	FBgn0037801	-	3074	9.44016	6.03856	0.644606	1	1
FBtr0337049	FBgn0262617	-	5525	0.465466	0.577935	-0.312231	0.8374	0.999568
FBtr0337046	FBgn0038961	-	1876	0.136836	0.957902	-2.80743	0.36645	0.999568
FBtr0337047	FBgn0038956	-	1471	0.0993222	0.0896088	0.148476	1	1
FBtr0337044	FBgn0038965	-	1716	30.8242	30.0971	0.0344395	0.8974	0.999568
FBtr0337045	FBgn0038967	-	3080	0.0694009	0.0632716	0.133397	1	1
FBtr0337042	FBgn0038491	-	1855	0.723819	0.383064	0.918041	0.59925	0.999568
FBtr0337043	FBgn0038488	-	3789	3.49353	3.56168	-0.0278731	0.95035	0.999568
FBtr0337040	FBgn0039368	-	881	0.00737195	0.00388158	0.925401	1	1
FBtr0337041	FBgn0053170	-	357	181.864	169.835	0.098731	1	1
FBtr0343812	FBgn0001992	-	2787	0	0	0	1	1
FBtr0343813	FBgn0266204	-	653	0.340978	0.309361	0.14039	1	1
FBtr0343810	FBgn0263078	-	1469	0.000109352	0.000230247	-1.07421	1	1
FBtr0343811	FBgn0262355	-	604	0.0850695	0.153136	-0.848103	1	1
FBtr0343816	FBgn0266207	-	823	0.16821	0.125005	0.428274	1	1
FBtr0343817	FBgn0261804	-	6913	0.260731	0.207746	0.327743	1	1
FBtr0343814	FBgn0001994	-	4402	4.96081	3.24891	0.61062	0.23815	0.999568
FBtr0343818	FBgn0266206	-	1226	0.237157	0.30751	-0.374791	1	1
FBtr0343819	FBgn0051788	-	425	0	0	0	1	1
TCONS_00287344	XLOC_074883	-	220	1.01133	1.34581	-0.412213	1	1
TCONS_00287345	XLOC_074884	-	200	0.787182	2.83038	-1.84623	1	1
FBtr0300259	FBgn0000659	-	4030	1.33e-05	0	inf	1	1
FBtr0300255	FBgn0025628	-	2521	0.850516	0.408034	1.05965	0.7044	0.999568
FBtr0300254	FBgn0025628	-	2317	6.14349	5.38077	0.191245	0.81305	0.999568
FBtr0300257	FBgn0037773	-	713	2.59336	2.76537	-0.0926462	0.92565	0.999568
FBtr0300256	FBgn0014006	-	4596	36.8373	38.8533	-0.0768682	0.68365	0.999568
FBtr0075310	FBgn0052163	-	855	5.32286	5.36667	-0.0118242	0.9768	0.999568
FBtr0075313	FBgn0042177	-	3691	39.0616	43.5521	-0.156993	0.51565	0.999568
FBtr0075312	FBgn0042178	-	3649	1.38451	1.97729	-0.514149	0.22605	0.999568
FBtr0331228	FBgn0031664	-	2075	0.113496	0.106144	0.0966278	1	1
TCONS_00468255	XLOC_085839	-	4186	0.461887	0.396407	0.220559	0.75535	0.999568
FBtr0075314	FBgn0025558	-	465	35.3452	32.4449	0.123523	0.6654	0.999568
FBtr0075317	FBgn0036654	-	1393	0.0265257	0.0264348	0.00495129	1	1
TCONS_00793708	XLOC_156372	-	209	0	1.74122	#NAME?	0.2378	0.999568
FBtr0331224	FBgn0015623	-	2679	0.139246	0.0556314	1.32367	1	1
FBtr0331225	FBgn0031800	-	1774	0.858028	0.367583	1.22296	0.20395	0.999568
FBtr0331226	FBgn0031799	-	4546	1.35149	0.897882	0.589949	0.49555	0.999568
FBtr0073658	FBgn0030403	-	2509	30.0195	30.2046	-0.00886615	0.9641	0.999568
FBtr0073659	FBgn0041203	-	4964	3.23435	3.47555	-0.103766	0.82715	0.999568
FBtr0073652	FBgn0030396	-	2304	49.3157	44.5466	0.146734	0.445	0.999568
FBtr0073653	FBgn0030398	-	818	0.274922	0.583056	-1.08461	0.60025	0.999568
FBtr0073650	FBgn0030394	-	1326	0.244433	0.223532	0.128955	1	1
FBtr0073651	FBgn0002562	-	2625	0.158771	0.209041	-0.396836	1	1
FBtr0073656	FBgn0030408	-	1544	0.0799856	0.129106	-0.690746	1	1
FBtr0073657	FBgn0030406	-	1526	5.07528	5.06242	0.00365888	0.9946	0.999568
FBtr0073655	FBgn0030407	-	2123	6.26558	5.95543	0.0732421	0.77725	0.999568
FBtr0333745	FBgn0261802	-	6913	0.360068	0.218939	0.717741	0.82715	0.999568
FBtr0333744	FBgn0261802	-	5823	0.669078	0.541944	0.304032	0.8899	0.999568
FBtr0333746	FBgn0013323	-	673	0	0.0020012	#NAME?	1	1
FBtr0333740	FBgn0040031	-	1252	0.0962708	0.15033	-0.642965	1	1
FBtr0333743	FBgn0261802	-	9304	0.127278	0.119285	0.0935698	1	1
FBtr0333742	FBgn0261802	-	6550	0.0498151	0.159637	-1.68014	1	1
FBtr0345973	FBgn0267017	-	541	0.203842	0.317836	-0.640832	1	1
FBtr0345972	FBgn0267016	-	210	0	0	0	1	1
FBtr0345970	FBgn0267015	-	306	0.306819	0.275892	0.153284	1	1
FBtr0333749	FBgn0015558	-	3757	0.232063	0.25279	-0.123418	1	1
FBtr0333748	FBgn0016041	-	2395	19.0612	17.6956	0.107245	0.78815	0.999568
FBtr0345975	FBgn0267019	-	270	1.11221	0.19471	2.51402	1	1
FBtr0345974	FBgn0267018	-	303	0	0	0	1	1
FBtr0336715	FBgn0053547	-	6268	0	0	0	1	1
FBtr0336714	FBgn0053547	-	10187	0.335389	0.309922	0.113932	1	1
FBtr0336717	FBgn0053547	-	10892	0.0949119	0.0664708	0.513869	1	1
FBtr0336716	FBgn0053547	-	6964	0.000201171	0	inf	1	1
FBtr0336711	FBgn0259736	-	5439	0.137615	0.714107	-2.3755	0.2869	0.999568
FBtr0336710	FBgn0037837	-	2089	0.0589233	0	inf	1	1
FBtr0336713	FBgn0053547	-	7864	0	0	0	1	1
FBtr0113186	FBgn0037182	-	2580	16.3625	23.6416	-0.530941	0.13495	0.999568
FBtr0336719	FBgn0053547	-	10519	0.0143436	0	inf	1	1
FBtr0336718	FBgn0053547	-	8629	0	0	0	1	1
FBtr0330177	FBgn0000565	-	980	53.042	37.8093	0.488395	0.1269	0.999568
FBtr0330723	FBgn0260486	-	8434	3.15543	3.39643	-0.106187	0.77405	0.999568
FBtr0330176	FBgn0000565	-	1056	26.2657	31.9973	-0.284769	0.45295	0.999568
FBtr0333811	FBgn0261793	-	6934	8.55967	10.5012	-0.29492	0.4662	0.999568
FBtr0330175	FBgn0037182	-	2298	0.132913	0.450258	-1.76027	0.62275	0.999568
FBtr0333810	FBgn0264712	-	4339	0.0913115	0.0750752	0.282461	1	1
FBtr0113180	FBgn0036880	-	1516	0.0677643	0.160031	-1.23975	1	1
FBtr0333813	FBgn0060296	-	2369	0.517138	0.195099	1.40634	0.22255	0.999568
FBtr0111094	FBgn0033159	-	7747	0.0299812	0	inf	1	1
FBtr0333815	FBgn0085434	-	12573	0.164265	0.260668	-0.666189	1	1
FBtr0111092	FBgn0033159	-	7690	0.0178687	0.00908916	0.975212	1	1
FBtr0333817	FBgn0085434	-	11475	0.0199842	0.0738383	-1.88551	1	1
FBtr0333816	FBgn0085434	-	12475	0.215943	0.24199	-0.164297	1	1
FBtr0081099	FBgn0032705	-	2276	57.7722	64.5553	-0.160159	0.4281	0.999568
FBtr0081098	FBgn0032703	-	843	49.6079	48.6518	0.0280744	0.89835	0.999568
FBtr0333818	FBgn0028476	-	4844	1.05104	1.53134	-0.54298	0.6088	0.999568
FBtr0081091	FBgn0261597	-	1112	5.83505	5.88034	-0.011154	1	1
FBtr0081090	FBgn0261597	-	692	31.0987	28.0102	0.150906	0.93245	0.999568
FBtr0081093	FBgn0086909	-	1842	4.7996	5.63755	-0.232153	0.78035	0.999568
FBtr0081092	FBgn0086909	-	1971	22.0112	16.6307	0.404384	0.3224	0.999568
FBtr0081095	FBgn0032698	-	1216	43.2629	49.3021	-0.18852	0.54165	0.999568
FBtr0081097	FBgn0032701	-	1873	30.3095	26.3402	0.202505	0.4645	0.999568
FBtr0081096	FBgn0032700	-	2351	24.3741	26.2777	-0.108492	1	1
FBtr0112858	FBgn0010348	-	1493	0.114045	0.0537105	1.08633	1	1
FBtr0074389	FBgn0030824	-	814	0.564975	0.483284	0.225314	0.71495	0.999568
FBtr0074388	FBgn0000163	-	11772	26.8211	26.2827	0.0292498	0.8787	0.999568
FBtr0080514	FBgn0023407	-	5743	0	0.206463	#NAME?	1	1
FBtr0111099	FBgn0033159	-	7756	0	0	0	1	1
FBtr0074381	FBgn0030813	-	2013	34.0056	34.5317	-0.0221511	0.90875	0.999568
FBtr0074383	FBgn0030816	-	2433	21.0107	18.1766	0.209037	0.72705	0.999568
FBtr0074382	FBgn0030814	-	1838	0.0845053	0.134981	-0.675648	1	1
FBtr0074385	FBgn0030817	-	1920	140.491	168.892	-0.265624	0.27355	0.999568
FBtr0074384	FBgn0030817	-	2087	33.017	43.7147	-0.40491	0.4096	0.999568
FBtr0074387	FBgn0260747	-	997	65.0173	58.5983	0.149965	0.4821	0.999568
FBtr0074386	FBgn0260748	-	5088	12.4962	16.4154	-0.393561	0.15055	0.999568
FBtr0339958	FBgn0033886	-	1495	0.453738	0.4367	0.0552165	0.95635	0.999568
FBtr0339959	FBgn0033901	-	1570	23.1385	23.9533	-0.0499296	0.86675	0.999568
FBtr0339956	FBgn0002643	-	7884	1.11058	1.29182	-0.218097	0.6887	0.999568
TCONS_00974745	XLOC_209779	-	203	1.53038	0.640791	1.25597	1	1
FBtr0339957	FBgn0033889	-	5083	18.9377	19.4204	-0.0363091	1	1
FBtr0339954	FBgn0033883	-	1244	50.3019	45.942	0.1308	1	1
FBtr0113007	FBgn0031145	-	1607	3.35474	3.33167	0.00995323	0.9922	0.999568
FBtr0113004	FBgn0030976	-	2020	11.8442	9.54204	0.311813	0.2536	0.999568
FBtr0339955	FBgn0013770	-	1662	0.316549	0.297239	0.0908044	1	1
FBtr0113003	FBgn0030954	-	2230	0.283825	0.256956	0.143478	1	1
FBtr0113000	FBgn0030925	-	2408	1.20756	2.00312	-0.73015	0.19715	0.999568
FBtr0334718	FBgn0038826	-	3397	0	0	0	1	1
FBtr0334717	FBgn0038826	-	2862	0	0	0	1	1
FBtr0334716	FBgn0038826	-	4732	0	0	0	1	1
FBtr0334715	FBgn0038826	-	3407	0	0	0	1	1
FBtr0334714	FBgn0038826	-	2837	0	0	0	1	1
FBtr0334713	FBgn0038826	-	7374	0.157467	0.0424813	1.89015	1	1
FBtr0334712	FBgn0038826	-	2610	3.28327	3.09127	0.0869338	0.9339	0.999568
FBtr0113008	FBgn0031209	-	2629	0.651224	0.662757	-0.0253251	0.9536	0.999568
FBtr0113009	FBgn0031245	-	1455	1.30243	0.86629	0.588287	0.61775	0.999568
FBtr0080519	FBgn0032524	-	1335	24.3395	25.3108	-0.0564524	0.8258	0.999568
FBtr0339951	FBgn0033872	-	1108	0.149124	0	inf	1	1
FBtr0075162	FBgn0036759	-	1021	23.0193	16.9716	0.439718	1	1
FBtr0075163	FBgn0052189	-	430	0.147343	0.0670793	1.13524	1	1
FBtr0075160	FBgn0036761	-	1763	19.78	20.1566	-0.0272037	1	1
FBtr0075161	FBgn0036760	-	1288	98.607	95.4945	0.0462733	0.8287	0.999568
FBtr0075167	FBgn0036756	-	1553	17.0616	10.0729	0.760272	0.01305	0.645783
FBtr0075164	FBgn0052188	-	349	0	0.305242	#NAME?	1	1
FBtr0075169	FBgn0052187	-	1326	1.92485	1.35589	0.505503	0.22075	0.999568
FBtr0339087	FBgn0265178	-	2010	3.03674	4.43997	-0.548028	0.58275	0.999568
FBtr0088526	FBgn0025286	-	522	11.3537	7.85969	0.530619	0.88015	0.999568
FBtr0088527	FBgn0025286	-	577	7.65599	9.39676	-0.295575	0.91035	0.999568
FBtr0088524	FBgn0033428	-	1299	86.9094	83.4678	0.0582929	0.7677	0.999568
FBtr0088525	FBgn0025286	-	509	2866.73	2418.1	0.245532	0.3784	0.999568
FBtr0088522	FBgn0033426	-	1929	15.0703	13.2092	0.190173	0.84045	0.999568
FBtr0088523	FBgn0033426	-	1880	1.83577	1.82693	0.00696611	0.9943	0.999568
FBtr0088520	FBgn0033423	-	1686	28.083	21.6382	0.376114	0.087	0.999568
FBtr0088521	FBgn0033426	-	1673	0	0	0	1	1
FBtr0080052	FBgn0053303	-	1516	101.693	103.303	-0.0226638	1	1
FBtr0331596	FBgn0015774	-	6391	0.0960636	2.62e-05	11.8422	1	1
FBtr0080050	FBgn0262782	-	1159	312.351	302.7	0.0452768	1	1
FBtr0080051	FBgn0004106	-	1082	193.564	209.79	-0.116134	0.53605	0.999568
FBtr0080054	FBgn0027568	-	4070	28.7371	28.9718	-0.0117377	1	1
FBtr0080055	FBgn0032228	-	1405	9.47304	7.55772	0.325877	0.24225	0.999568
FBtr0080059	FBgn0011703	-	2577	159.123	183.489	-0.205553	0.27385	0.999568
FBtr0331594	FBgn0030349	-	4771	0.267051	0.324362	-0.28049	1	1
FBtr0112755	FBgn0085478	-	2342	0.123691	0.313423	-1.34136	1	1
FBtr0112754	FBgn0085478	-	4189	1.77042	1.95999	-0.146757	0.80785	0.999568
FBtr0112757	FBgn0085480	-	945	6.95e-05	4.36e-06	3.99577	1	1
FBtr0112756	FBgn0085479	-	1472	0.247892	0.471498	-0.927543	0.74665	0.999568
FBtr0112751	FBgn0085476	-	1472	0.136768	7.22e-06	14.2104	1	1
FBtr0112750	FBgn0085475	-	350	6.41663	3.50663	0.871731	0.0915	0.999568
FBtr0112753	FBgn0085478	-	6294	0	0	0	1	1
FBtr0112752	FBgn0085477	-	1052	0.104811	0.110517	-0.0764884	1	1
FBtr0331590	FBgn0030351	-	716	0.227912	0.15885	0.520817	1	1
FBtr0331591	FBgn0030349	-	4492	0.514043	0.304945	0.753339	0.5585	0.999568
TCONS_00001721	XLOC_000873	-	582	0.0462581	0.405917	-3.13341	1	1
TCONS_00683554	XLOC_150236	-	208	0	0	0	1	1
FBtr0089433	FBgn0005278	-	2353	0	0	0	1	1
FBtr0089432	FBgn0005278	-	2283	151.754	145.294	0.0627602	0.8321	0.999568
FBtr0089431	FBgn0005278	-	2380	0.00304909	0.0124273	-2.02707	1	1
FBtr0089430	FBgn0005278	-	2380	75.2052	74.3413	0.0166675	0.96665	0.999568
FBtr0089437	FBgn0005278	-	2387	0.38852	0.323327	0.264997	0.7405	0.999568
FBtr0089436	FBgn0005278	-	1971	0.314418	0.104124	1.59438	1	1
FBtr0089435	FBgn0005278	-	2309	56.0354	49.5478	0.177518	0.7199	0.999568
FBtr0089434	FBgn0005278	-	2429	19.3158	18.3475	0.0741968	0.9278	0.999568
FBtr0083651	FBgn0004652	-	3402	0.521265	0.716486	-0.458921	0.49245	0.999568
FBtr0088383	FBgn0000715	-	1427	1.44162	0.885691	0.702816	0.10605	0.999568
FBtr0088380	FBgn0050008	-	965	137.492	79.8539	0.783913	0.0225	0.887364
FBtr0088381	FBgn0050007	-	5297	5.85607	6.7164	-0.197756	0.53185	0.999568
FBtr0083655	FBgn0038617	-	2167	14.7529	16.0029	-0.117336	0.59855	0.999568
FBtr0088387	FBgn0027619	-	1363	0	0.118116	#NAME?	1	1
FBtr0088384	FBgn0033465	-	2300	61.1786	57.2771	0.0950688	0.66535	0.999568
FBtr0088385	FBgn0033466	-	2621	6.21175	8.3708	-0.430367	0.44845	0.999568
FBtr0083658	FBgn0038613	-	2728	12.7462	9.49132	0.425384	0.0588	0.999568
FBtr0088388	FBgn0033471	-	1526	36.1668	35.63	0.0215727	0.9186	0.999568
FBtr0088389	FBgn0033471	-	1581	0.655726	0.963977	-0.555906	0.73535	0.999568
FBtr0087721	FBgn0033828	-	592	0	0.119018	#NAME?	1	1
FBtr0087720	FBgn0033830	-	1458	0.748439	0.525614	0.509881	0.3122	0.999568
FBtr0087722	FBgn0033792	-	2932	0.032478	4.35e-05	9.54471	1	1
FBtr0333623	FBgn0264604	-	668	0.0736235	0.0990885	-0.428551	1	1
FBtr0087729	FBgn0086532	-	1799	0.376338	0.405753	-0.108573	0.9618	0.999568
FBtr0087728	FBgn0020391	-	3235	1.05064	0.775911	0.437299	0.8834	0.999568
FBtr0333106	FBgn0260442	-	9409	0.96053	0.663513	0.533706	0.75205	0.999568
FBtr0333105	FBgn0260442	-	9937	0.630897	0.44502	0.503533	0.778	0.999568
FBtr0346590	FBgn0051781	-	2557	0	0.00995429	#NAME?	1	1
FBtr0309054	FBgn0004244	-	3821	0.0865474	0.0362265	1.25644	1	1
FBtr0309055	FBgn0010388	-	754	0.175032	0.0397733	2.13775	1	1
FBtr0346593	FBgn0025712	-	1292	0.137594	0.358044	-1.37972	1	1
FBtr0333101	FBgn0004435	-	1813	1.80907	3.97685	-1.13638	0.4781	0.999568
FBtr0071368	FBgn0264691	-	1760	53.9074	51.7603	0.0586353	0.81915	0.999568
FBtr0333100	FBgn0027356	-	2497	5.33169	3.17956	0.745764	0.29855	0.999568
FBtr0346595	FBgn0267314	-	604	0.131355	0	inf	1	1
FBtr0346596	FBgn0267315	-	579	0.134522	0.0818119	0.717461	1	1
FBtr0346597	FBgn0264513	-	1122	0.0240423	0.0508548	-1.08081	1	1
FBtr0290228	FBgn0036767	-	698	13.6014	15.1224	-0.152932	0.6085	0.999568
FBtr0290229	FBgn0032299	-	442	3.42605	0.762752	2.16726	0.00885	0.51123
FBtr0290227	FBgn0030289	-	3430	8.24088	9.17745	-0.155294	0.7809	0.999568
FBtr0290224	FBgn0035480	-	579	5.52654	3.3955	0.702749	1	1
FBtr0290225	FBgn0035548	-	686	0.0310081	0.0249849	0.31159	1	1
FBtr0290222	FBgn0037244	-	1178	77.9906	83.6683	-0.10138	0.69115	0.999568
FBtr0290223	FBgn0035797	-	2586	0.161782	0.324514	-1.00422	1	1
FBtr0290220	FBgn0035159	-	972	0.272601	0.455109	-0.739421	0.7419	0.999568
FBtr0290221	FBgn0036690	-	867	81.0093	87.7025	-0.11453	0.7206	0.999568
TCONS_00663367	XLOC_169913	-	801	0.434518	0.466727	-0.103162	0.95195	0.999568
TCONS_00965671	XLOC_195065	-	212	1.21328	0	inf	1	1
TCONS_00965672	XLOC_195066	-	208	0.632226	0.595092	0.0873269	1	1
FBtr0082520	FBgn0037955	-	1665	5.21039	3.45187	0.594014	0.40595	0.999568
FBtr0082521	FBgn0037955	-	1638	1.89355	2.16774	-0.195099	0.8732	0.999568
FBtr0082522	FBgn0037955	-	1430	3.42547	2.72559	0.329735	0.7462	0.999568
FBtr0082526	FBgn0051116	-	4353	0.280681	0.225496	0.315826	1	1
FBtr0082527	FBgn0051116	-	3972	2.00744	1.32613	0.598136	0.3016	0.999568
FBtr0082528	FBgn0051116	-	3994	0.228811	0.175301	0.384321	1	1
FBtr0082529	FBgn0025802	-	6782	0.264956	0.138736	0.933415	1	1
FBtr0086450	FBgn0260934	-	4827	15.4473	18.5238	-0.262029	0.56975	0.999568
FBtr0310479	FBgn0263765	-	655	0.0367357	0.205188	-2.48169	1	1
FBtr0086457	FBgn0260934	-	4868	2.0649	1.29652	0.671429	0.6699	0.999568
FBtr0310470	FBgn0261861	-	496	0.0353128	7.53e-06	12.1955	1	1
FBtr0310471	FBgn0261860	-	392	0	0	0	1	1
FBtr0310472	FBgn0261860	-	484	0	0	0	1	1
FBtr0310473	FBgn0038946	-	1103	0.134592	0.196869	-0.548642	1	1
FBtr0310475	FBgn0031191	-	2292	0.913755	0.881446	0.0519351	0.983	0.999568
FBtr0310476	FBgn0013799	-	2042	0.191443	0.146576	0.38527	1	1
FBtr0310477	FBgn0036911	-	1330	0.695711	0.996838	-0.518872	0.70895	0.999568
FBtr0072242	FBgn0010278	-	2507	74.2221	84.7924	-0.192085	0.3089	0.999568
FBtr0072241	FBgn0028411	-	527	108.84	114.176	-0.0690506	0.81825	0.999568
FBtr0072246	FBgn0034973	-	500	0.113825	0.102765	0.147466	1	1
FBtr0072247	FBgn0034974	-	2800	1.68e-05	0.00325006	-7.59535	1	1
FBtr0072245	FBgn0034904	-	614	0.702282	0.97544	-0.474002	0.86235	0.999568
FBtr0072248	FBgn0034974	-	2815	0.0409531	0.000447327	6.5165	1	1
FBtr0072249	FBgn0086129	-	3936	28.6372	32.9654	-0.203061	0.3061	0.999568
FBtr0086182	FBgn0022960	-	3470	2.85548	2.64901	0.108284	0.8797	0.999568
FBtr0086183	FBgn0022960	-	3467	30.3389	35.0152	-0.20681	0.2984	0.999568
FBtr0086180	FBgn0029506	-	1394	204.375	156.755	0.382706	0.04215	0.999568
FBtr0086181	FBgn0029507	-	886	44.1374	34.0372	0.374893	1	1
FBtr0086186	FBgn0050157	-	1034	0.339252	0.148915	1.18787	1	1
FBtr0086184	FBgn0050156	-	1425	0.0466144	0.143386	-1.62106	1	1
FBtr0086185	FBgn0033121	-	1911	32.6517	35.3027	-0.112618	1	1
TCONS_00364439	XLOC_056155	-	970	1.82053	1.2795	0.508779	0.4137	0.999568
TCONS_00473323	XLOC_095955	-	208	0	1.19018	#NAME?	1	1
TCONS_00958455	XLOC_220979	-	1251	0.340243	0.487478	-0.518772	0.7897	0.999568
TCONS_00251198	XLOC_079790	-	218	0.497765	0	inf	1	1
FBtr0302637	FBgn0259243	-	1648	1.19416	1.1159	0.0977919	0.9548	0.999568
FBtr0302639	FBgn0259243	-	3245	3.51042	2.05592	0.771863	0.3301	0.999568
FBtr0302638	FBgn0259243	-	2426	2.84239	2.81471	0.0141165	0.9879	0.999568
FBtr0084968	FBgn0039404	-	657	48.5617	47.569	0.0297968	0.91475	0.999568
FBtr0084969	FBgn0039407	-	1069	5.92834	8.436	-0.508931	0.1988	0.999568
FBtr0084962	FBgn0001139	-	2969	38.2925	47.0876	-0.298288	0.2515	0.999568
FBtr0084963	FBgn0001139	-	2988	2.71006	3.58667	-0.404322	0.68305	0.999568
FBtr0084960	FBgn0002633	-	982	0.375019	0.402259	-0.101162	1	1
FBtr0084961	FBgn0000591	-	769	0.0607287	0.16468	-1.43921	1	1
FBtr0084966	FBgn0001139	-	3002	1.08981	0.547673	0.992689	0.66905	0.999568
FBtr0084967	FBgn0039402	-	1248	53.4687	49.9362	0.0986082	0.62825	0.999568
FBtr0084964	FBgn0001139	-	2908	0	0	0	1	1
FBtr0084965	FBgn0001139	-	2887	0.126899	0.216424	-0.770185	1	1
Novel000150.1	Novel000150	-	991	0.258607	0.450797	-0.801715	0.3578	0.999568
FBtr0307373	FBgn0263132	-	8588	0.0672795	0.0747194	-0.151317	1	1
FBtr0307372	FBgn0263132	-	7541	0.0159478	0.0823473	-2.36836	1	1
FBtr0307371	FBgn0263132	-	5317	3.07e-05	0	inf	1	1
FBtr0307370	FBgn0263132	-	4678	0.131889	0.0724217	0.864832	1	1
FBtr0307377	FBgn0035888	-	2734	0.79361	0.354721	1.16175	0.5335	0.999568
FBtr0307376	FBgn0035888	-	2641	3.1699	3.283	-0.0505769	0.9455	0.999568
FBtr0307375	FBgn0263132	-	11742	0.000201402	6.07e-05	1.73034	1	1
FBtr0307374	FBgn0263132	-	14423	0.00624625	0.0105981	-0.762745	1	1
FBtr0307379	FBgn0039904	-	5372	8.90208	9.68011	-0.120882	0.81175	0.999568
FBtr0307378	FBgn0035888	-	2779	0.911405	0.366074	1.31596	0.4636	0.999568
TCONS_00012211	XLOC_012280	-	1047	0.210595	0.258421	-0.29525	1	1
FBtr0079261	FBgn0027496	-	1105	69.7739	63.0166	0.146955	0.5124	0.999568
FBtr0079260	FBgn0031820	-	5718	4.96714	4.83157	0.0399238	0.9198	0.999568
FBtr0079263	FBgn0031824	-	1441	28.1597	28.7859	-0.0317283	0.91855	0.999568
FBtr0079262	FBgn0051638	-	3212	1.58219	0.870832	0.861458	0.3796	0.999568
FBtr0079265	FBgn0031821	-	1002	0.433989	0	inf	1	1
FBtr0079264	FBgn0031822	-	483	73.9852	72.2388	0.0344624	0.9314	0.999568
FBtr0079267	FBgn0031818	-	1944	26.5424	29.3314	-0.14415	0.51175	0.999568
FBtr0079266	FBgn0086357	-	2019	182.046	161.703	0.170957	1	1
FBtr0079269	FBgn0259749	-	1921	9.43729	8.99293	0.0695813	0.91555	0.999568
FBtr0080934	FBgn0261068	-	705	31.5466	32.8136	-0.0568067	0.88115	0.999568
FBtr0080937	FBgn0032595	-	529	46.2343	40.6036	0.187356	0.76565	0.999568
FBtr0080936	FBgn0032596	-	774	207.141	203.006	0.0290883	1	1
FBtr0080931	FBgn0032609	-	1624	0.0125934	0.0440109	-1.8052	1	1
FBtr0080930	FBgn0022213	-	3237	126.361	145.821	-0.206648	0.3236	0.999568
FBtr0080933	FBgn0032602	-	1487	0.0953377	0.102565	-0.105415	1	1
FBtr0080932	FBgn0000406	-	1465	236.063	202.172	0.223586	1	1
FBtr0303278	FBgn0261803	-	1407	0.0793031	0.0593467	0.418208	1	1
FBtr0303279	FBgn0261803	-	1412	0.150649	0.0772176	0.96419	1	1
FBtr0303276	FBgn0261802	-	4308	0.457663	0.690004	-0.592317	0.8379	0.999568
FBtr0303277	FBgn0261802	-	10534	0	0	0	1	1
FBtr0303274	FBgn0261802	-	3774	1.66191	1.40883	0.238341	0.88725	0.999568
FBtr0303275	FBgn0261802	-	4450	0.160815	0.112324	0.51774	1	1
FBtr0303272	FBgn0261802	-	6348	9.62527	9.53378	0.0137797	0.9768	0.999568
FBtr0303273	FBgn0261802	-	6732	1.20319	1.04567	0.202431	0.88145	0.999568
FBtr0303270	FBgn0261801	-	2857	2.57048	2.25193	0.190878	0.53005	0.999568
FBtr0303271	FBgn0261802	-	6880	4.55555	4.35599	0.0646228	0.92355	0.999568
FBtr0084038	FBgn0003257	-	2039	34.8828	36.0417	-0.0471508	0.8925	0.999568
FBtr0084039	FBgn0025865	-	2416	23.5539	24.7526	-0.0716153	0.7455	0.999568
FBtr0084030	FBgn0038859	-	591	0.173104	0.119924	0.529522	1	1
FBtr0084032	FBgn0267841	-	3492	48.8028	47.9446	0.0255951	0.92645	0.999568
FBtr0084033	FBgn0038857	-	1000	52.128	50.8938	0.0345671	0.90655	0.999568
FBtr0084034	FBgn0266674	-	2799	31.6004	33.9635	-0.10404	0.6833	0.999568
FBtr0084035	FBgn0038854	-	3171	24.1809	24.3232	-0.00846247	0.9662	0.999568
FBtr0084036	FBgn0038853	-	5353	13.891	16.9526	-0.287354	0.1401	0.999568
FBtr0084037	FBgn0038852	-	1267	0.114529	0.162541	-0.505093	1	1
FBtr0075501	FBgn0260635	-	1820	0	0	0	1	1
FBtr0304134	FBgn0032252	-	2131	0.914227	0.761822	0.263097	0.64415	0.999568
FBtr0304137	FBgn0032259	-	1553	15.2888	16.661	-0.123998	1	1
FBtr0304133	FBgn0032256	-	2001	9.56353	10.4968	-0.134336	0.656	0.999568
FBtr0304138	FBgn0086347	-	3882	0.360392	0.0801447	2.16889	0.44355	0.999568
FBtr0304139	FBgn0262148	-	1374	0.353506	0.322148	0.134014	0.845	0.999568
TCONS_00539486	XLOC_105747	-	206	2.03812	1.18357	0.784097	1	1
FBtr0344070	FBgn0031040	-	559	70.4603	60.3737	0.22289	1	1
TCONS_00950446	XLOC_207433	-	249	0	0.256337	#NAME?	1	1
FBtr0331295	FBgn0032987	-	662	19.5608	16.8002	0.219487	0.9526	0.999568
FBtr0300724	FBgn0036218	-	1898	0.0597615	4.85e-05	10.2681	1	1
FBtr0300727	FBgn0265574	-	3219	19.6416	21.966	-0.16136	1	1
FBtr0300721	FBgn0036218	-	1901	4.18e-05	3.22e-05	0.378637	1	1
FBtr0300722	FBgn0036218	-	1847	0.0434517	0.0570433	-0.392646	1	1
FBtr0300728	FBgn0039349	-	1847	3.38448	3.11535	0.119541	0.87865	0.999568
FBtr0305269	FBgn0085329	-	635	0.00575582	0.00578952	-0.00842221	1	1
FBtr0305268	FBgn0040206	-	1988	72.1175	77.2708	-0.0995742	1	1
FBtr0305263	FBgn0043841	-	953	0.359393	0	inf	1	1
FBtr0305262	FBgn0020309	-	6150	0.326416	0.541769	-0.730965	0.6245	0.999568
FBtr0305261	FBgn0032362	-	2954	0.220628	0.258574	-0.228966	1	1
FBtr0305260	FBgn0004363	-	1525	45.6493	47.1787	-0.0475418	0.95005	0.999568
FBtr0305265	FBgn0032405	-	1386	0.0501382	0.0899952	-0.843938	1	1
FBtr0114628	FBgn0034180	-	3829	8.47057	8.59038	-0.0202634	0.94865	0.999568
FBtr0114623	FBgn0000578	-	4107	0.211033	0.200434	0.0743383	1	1
FBtr0114622	FBgn0265356	-	5170	2.33613	1.46873	0.66955	0.21585	0.999568
FBtr0114627	FBgn0034180	-	4361	1.92727	1.47155	0.389219	0.54605	0.999568
FBtr0083358	FBgn0022344	-	938	73.5954	67.4661	0.125452	0.54425	0.999568
FBtr0344579	FBgn0262098	-	783	0.177868	0.0535939	1.73067	1	1
TCONS_00639369	XLOC_134692	-	263	0.496242	0.431662	0.201142	1	1
FBtr0083350	FBgn0003944	-	2784	0.448948	0.483303	-0.106378	0.9072	0.999568
FBtr0083351	FBgn0003944	-	3117	1.8729	1.38781	0.432466	0.36585	0.999568
FBtr0083352	FBgn0003944	-	4180	3.46e-05	0.000161871	-2.22482	1	1
FBtr0083353	FBgn0051217	-	2289	12.0605	10.8377	0.154236	0.5045	0.999568
FBtr0083354	FBgn0038455	-	1103	29.249	26.9176	0.119837	0.6039	0.999568
FBtr0344575	FBgn0262814	-	477	0.000310179	0	inf	1	1
FBtr0083356	FBgn0038454	-	1811	13.6762	16.304	-0.253552	0.528	0.999568
FBtr0083357	FBgn0038452	-	1660	0.107028	0.119026	-0.153287	1	1
FBtr0111053	FBgn0033159	-	7699	0	0.0375913	#NAME?	1	1
FBtr0111052	FBgn0033159	-	7702	2.13e-05	0.0115249	-9.08118	1	1
FBtr0111051	FBgn0033159	-	7744	0.00969541	0.0235593	-1.28092	1	1
FBtr0111050	FBgn0033159	-	7744	0.0141872	0.0370331	-1.38422	1	1
FBtr0111057	FBgn0033159	-	7702	0.0236257	0.0171626	0.461091	1	1
FBtr0111056	FBgn0033159	-	7699	0.0237558	0.020231	0.231716	1	1
FBtr0111055	FBgn0033159	-	7747	0	0.00965914	#NAME?	1	1
FBtr0111054	FBgn0033159	-	7744	8.96e-05	0.0208401	-7.861	1	1
FBtr0111059	FBgn0033159	-	7747	0	0	0	1	1
FBtr0111058	FBgn0033159	-	7741	0	0.0124084	#NAME?	1	1
FBtr0345752	FBgn0032068	-	3074	1.75245	0.00813068	7.75178	0.3052	0.999568
TCONS_00076397	XLOC_040096	-	1999	0.57098	0.516928	0.143477	0.75685	0.999568
FBtr0306769	FBgn0033159	-	7755	0	0	0	1	1
FBtr0306768	FBgn0033159	-	7710	3.11e-05	0.0364113	-10.1937	1	1
FBtr0306767	FBgn0033159	-	7764	0.0598482	0	inf	1	1
FBtr0301633	FBgn0264493	-	2311	86.1221	100.239	-0.218985	0.6149	0.999568
FBtr0077206	FBgn0003423	-	3778	0	0	0	1	1
TCONS_00693994	XLOC_164933	-	208	1.30221	0	inf	1	1
FBtr0075360	FBgn0002284	-	944	288.702	284.427	0.021522	0.9067	0.999568
FBtr0075361	FBgn0036648	-	1154	25.5751	24.2336	0.0777304	0.89555	0.999568
FBtr0075363	FBgn0027500	-	3686	63.9289	79.5958	-0.316222	0.0911	0.999568
FBtr0075364	FBgn0003741	-	687	6.40501	7.43438	-0.215012	0.83635	0.999568
FBtr0075365	FBgn0036643	-	897	40.3321	36.9051	0.128109	0.8375	0.999568
FBtr0075366	FBgn0036601	-	544	0.147908	0.36045	-1.2851	1	1
FBtr0331274	FBgn0264262	-	1047	0.10423	0.148218	-0.507953	1	1
FBtr0075369	FBgn0042201	-	538	11.5751	6.14092	0.9145	0.01745	0.763907
FBtr0331279	FBgn0264260	-	411	0.155367	0.0729115	1.09146	1	1
TCONS_00943984	XLOC_196331	-	1115	0.545415	0.479749	0.185073	0.8997	0.999568
TCONS_01061984	XLOC_216065	-	219	0	2.22397	#NAME?	0.1852	0.999568
FBtr0071845	FBgn0034724	-	1116	53.7779	38.0946	0.497426	1	1
FBtr0071847	FBgn0034720	-	4656	0.000125022	0.000274763	-1.13601	1	1
FBtr0071846	FBgn0034720	-	4703	0.1869	0.381316	-1.02872	0.41125	0.999568
FBtr0071841	FBgn0034729	-	1190	22.6446	23.0068	-0.0228942	0.92715	0.999568
FBtr0071840	FBgn0034729	-	1132	4.16076	4.43968	-0.093611	0.8778	0.999568
FBtr0071843	FBgn0022986	-	1592	2.85832	4.1706	-0.545087	0.3822	0.999568
FBtr0071842	FBgn0034727	-	1440	46.6062	46.631	-0.000769539	0.99795	0.999568
FBtr0071849	FBgn0034718	-	3087	10.9287	8.85924	0.302871	0.1821	0.999568
FBtr0071848	FBgn0017482	-	1959	12.2072	10.1116	0.271718	0.73415	0.999568
FBtr0332896	FBgn0028342	-	978	43.1073	35.1791	0.293215	1	1
FBtr0332897	FBgn0040941	-	494	5.1e-06	0	inf	1	1
FBtr0332894	FBgn0029895	-	4754	2.10674	2.06886	0.0261764	0.95305	0.999568
FBtr0332895	FBgn0030181	-	1095	1.08075	1.19027	-0.139252	0.9441	0.999568
FBtr0332892	FBgn0029895	-	4433	0	0.0622984	#NAME?	1	1
FBtr0332893	FBgn0029895	-	4612	2.78776	2.53942	0.134609	0.7326	0.999568
FBtr0332890	FBgn0031053	-	2801	1.3731	1.04385	0.395519	0.3398	0.999568
FBtr0075417	FBgn0036623	-	1605	50.5561	47.5058	0.0897794	0.67195	0.999568
FBtr0331503	FBgn0264308	-	6433	0.846774	0.699025	0.276632	0.4481	0.999568
FBtr0332898	FBgn0030183	-	2606	0	0	0	1	1
FBtr0332899	FBgn0030183	-	2877	10.1081	10.5924	-0.0675101	0.8496	0.999568
FBtr0078678	FBgn0037372	-	1335	45.191	47.0386	-0.0578092	0.7739	0.999568
FBtr0070466	FBgn0003371	-	2847	0.654128	0.927973	-0.504509	0.7993	0.999568
FBtr0070467	FBgn0003371	-	2929	6.83857	7.84727	-0.198496	0.7214	0.999568
FBtr0070460	FBgn0001150	-	1780	0.209227	0.250052	-0.257159	1	1
FBtr0070461	FBgn0052797	-	931	0.235667	0.321369	-0.447484	1	1
FBtr0070462	FBgn0040385	-	1537	0.128705	0.129378	-0.00752159	1	1
FBtr0078670	FBgn0037376	-	1592	126.44	130.673	-0.0475042	0.8024	0.999568
FBtr0078672	FBgn0027608	-	2281	0	0	0	1	1
FBtr0070468	FBgn0003371	-	3055	22.8498	26.4335	-0.210184	0.47155	0.999568
FBtr0070469	FBgn0003371	-	4244	2.71551	2.02975	0.419921	0.6136	0.999568
FBtr0078677	FBgn0266672	-	3363	33.0623	34.8148	-0.074514	0.78355	0.999568
FBtr0075413	FBgn0014163	-	3283	0.0774604	0.0337304	1.19941	1	1
FBtr0085749	FBgn0062411	-	1031	0.041757	0.0757528	-0.859282	1	1
FBtr0075410	FBgn0027080	-	1771	61.6539	60.3543	0.0307358	0.87235	0.999568
FBtr0071599	FBgn0034618	-	4906	11.6441	12.2908	-0.0779703	0.8428	0.999568
FBtr0085748	FBgn0051008	-	529	0.0535444	0.0465924	0.200642	1	1
FBtr0075411	FBgn0036629	-	1700	7.04668	7.35449	-0.0616807	0.9247	0.999568
FBtr0071593	FBgn0016726	-	389	289.47	248.564	0.219798	0.74025	0.999568
FBtr0071592	FBgn0016726	-	329	4266.45	3432.81	0.313645	0.1298	0.999568
FBtr0071591	FBgn0034611	-	2563	1.47688	1.55771	-0.0768726	0.94155	0.999568
FBtr0071590	FBgn0034611	-	2399	3.36612	3.52049	-0.0646882	0.9293	0.999568
FBtr0346323	FBgn0051235	-	2494	0.058954	0.102905	-0.803657	1	1
FBtr0346322	FBgn0262794	-	593	0	0	0	1	1
FBtr0346321	FBgn0037672	-	1428	0.449878	0.627319	-0.479664	0.38935	0.999568
FBtr0346320	FBgn0267188	-	205	0	0	0	1	1
FBtr0346327	FBgn0267193	-	300	0.313665	0.290815	0.109123	1	1
FBtr0346326	FBgn0267192	-	395	0.429346	0.465789	-0.117535	1	1
FBtr0346325	FBgn0267191	-	673	12.9253	14.9346	-0.208464	1	1
FBtr0346324	FBgn0267190	-	467	0.0618612	0.290184	-2.22986	1	1
FBtr0346329	FBgn0267195	-	601	0.514164	0.38593	0.41389	0.6169	0.999568
FBtr0346328	FBgn0267194	-	211	0	0.522363	#NAME?	1	1
TCONS_00986570	XLOC_191850	-	205	1.3684	1.2879	0.0874633	1	1
FBtr0081842	FBgn0037581	-	1524	0.000142403	0.477318	-11.7108	0.0314	0.999568
FBtr0304855	FBgn0262526	-	3337	1.37608	1.69101	-0.297327	0.8475	0.999568
FBtr0304854	FBgn0262526	-	2241	77.0682	92.9063	-0.26964	0.2553	0.999568
FBtr0304853	FBgn0013733	-	17148	1.47741	1.65482	-0.163606	1	1
FBtr0304852	FBgn0013733	-	17813	0.201066	0.17504	0.199983	1	1
FBtr0304851	FBgn0013733	-	13661	4.43368	4.38066	0.017355	0.98035	0.999568
FBtr0304850	FBgn0013733	-	17845	0.409744	0.197084	1.05591	0.6954	0.999568
FBtr0081840	FBgn0037580	-	2398	109.673	121.017	-0.142001	0.5223	0.999568
FBtr0304859	FBgn0262475	-	3802	0.278403	0.304877	-0.131053	1	1
FBtr0304858	FBgn0262475	-	3987	0.0819066	0.253675	-1.63093	1	1
FBtr0078712	FBgn0037359	-	1080	17.6883	18.217	-0.0424957	0.95745	0.999568
FBtr0084835	FBgn0039335	-	2091	16.7268	17.7252	-0.0836368	0.75255	0.999568
FBtr0081844	FBgn0020249	-	1380	54.9478	55.1792	-0.00606515	0.98635	0.999568
FBtr0081845	FBgn0020249	-	1388	7.1147	6.42756	0.146531	1	1
FBtr0344335	FBgn0260634	-	8889	4.29224	5.13077	-0.257443	0.60795	0.999568
FBtr0084839	FBgn0039336	-	1280	23.9966	23.2361	0.0464622	0.8804	0.999568
FBtr0076108	FBgn0015828	-	1622	69.1616	78.2983	-0.179009	0.3506	0.999568
FBtr0071339	FBgn0030101	-	1277	7.74737	9.51212	-0.29606	0.5673	0.999568
FBtr0302092	FBgn0261261	-	5372	1.17003	0.000916877	10.3175	0.38165	0.999568
FBtr0344330	FBgn0033863	-	2193	0.118885	0.0787601	0.594029	1	1
FBtr0071333	FBgn0052704	-	2811	0.106599	0.114929	-0.108555	1	1
FBtr0076100	FBgn0036176	-	285	0.566675	0.661318	-0.222824	1	1
FBtr0071331	FBgn0000077	-	1422	3.87189	3.85008	0.00814716	0.99415	0.999568
FBtr0076102	FBgn0036184	-	1275	39.9521	41.1398	-0.0422637	0.8419	0.999568
FBtr0076105	FBgn0042138	-	1181	0.12866	0.480943	-1.9023	0.6234	0.999568
FBtr0076104	FBgn0042138	-	1237	2.50224	2.57633	-0.0420975	0.9701	0.999568
FBtr0076107	FBgn0036188	-	967	32.6706	32.0399	0.0281235	1	1
FBtr0076106	FBgn0052091	-	2967	9.68418	8.79043	0.139696	0.5418	0.999568
FBtr0330634	FBgn0033639	-	3693	0.695553	0.178926	1.9588	0.3579	0.999568
FBtr0079109	FBgn0031724	-	1804	0.152735	0.147711	0.0482589	1	1
FBtr0330636	FBgn0031217	-	1221	4.21944	3.78394	0.157163	0.9019	0.999568
FBtr0330637	FBgn0002931	-	1662	0.419715	1.18309	-1.49507	1	1
FBtr0330630	FBgn0020279	-	5116	0.281136	0.330417	-0.233019	1	1
FBtr0330631	FBgn0020279	-	4835	1.54801	0.898869	0.784232	0.63175	0.999568
FBtr0330632	FBgn0033639	-	2885	3.02064	2.68912	0.167724	0.83405	0.999568
FBtr0334992	FBgn0011571	-	1631	2.4257	0.841806	1.52684	0.36865	0.999568
FBtr0079100	FBgn0002525	-	3129	50.607	58.205	-0.201808	1	1
FBtr0079101	FBgn0031717	-	1216	0.00349816	0.00349814	7.97e-06	1	1
FBtr0079102	FBgn0031717	-	1529	0.0549595	0.314872	-2.51833	1	1
FBtr0079103	FBgn0031719	-	919	0.0701796	0.306398	-2.12628	1	1
FBtr0079104	FBgn0031721	-	1179	0.177467	0.145123	0.290278	1	1
FBtr0330639	FBgn0031228	-	586	8.69811	8.06241	0.109489	0.96955	0.999568
FBtr0079106	FBgn0004620	-	3253	1.9308	1.61718	0.255716	0.4369	0.999568
FBtr0331329	FBgn0041180	-	4700	1.97044	1.71487	0.200424	0.82815	0.999568
FBtr0077854	FBgn0031389	-	964	8.27607	5.96948	0.47134	1	1
FBtr0077850	FBgn0000097	-	4879	2.3273	2.49033	-0.097678	0.82605	0.999568
FBtr0077851	FBgn0000097	-	4266	0.078911	0.0160258	2.29983	1	1
FBtr0077852	FBgn0031391	-	1707	28.3314	30.72	-0.116779	1	1
FBtr0077853	FBgn0031390	-	5401	14.2066	15.126	-0.090469	0.781	0.999568
FBtr0347493	FBgn0027497	-	3777	0.329915	0.0577811	2.51342	1	1
FBtr0347490	FBgn0267929	-	588	0.260323	0	inf	1	1
FBtr0347496	FBgn0267730	-	2039	0.187762	0.111821	0.747716	1	1
FBtr0347497	FBgn0010812	-	3987	0.25645	0.295898	-0.206423	1	1
FBtr0347494	FBgn0036825	-	1139	2.06565	2.22798	-0.109138	0.91275	0.999568
FBtr0347495	FBgn0264513	-	3947	0.0829694	0.0787127	0.0759814	1	1
TCONS_00498996	XLOC_103359	-	227	0.850685	0	inf	1	1
FBtr0340642	FBgn0265708	-	663	3.23e-06	1.38e-06	1.22912	1	1
FBtr0340643	FBgn0265708	-	763	0.0315814	0.0558408	-0.822245	1	1
FBtr0340640	FBgn0265707	-	394	0.173626	0.0790602	1.13496	1	1
FBtr0340641	FBgn0265710	-	1641	0.164459	0.159949	0.0401178	1	1
FBtr0340646	FBgn0265712	-	368	0.193301	0	inf	1	1
FBtr0340644	FBgn0265709	-	390	0.177136	0.400067	-1.17539	1	1
FBtr0340645	FBgn0265711	-	495	0.175268	0.0517947	1.75869	1	1
FBtr0340648	FBgn0265715	-	392	0.0903018	0.474334	-2.39308	1	1
FBtr0340649	FBgn0265716	-	378	0.188567	0.595777	-1.65969	1	1
FBtr0345067	FBgn0261872	-	2998	1.63009	1.26519	0.365597	0.6692	0.999568
TCONS_00035907	XLOC_009834	-	214	0	0.513474	#NAME?	0.24665	0.999568
FBtr0345060	FBgn0041780	-	1519	0.0671437	0.155282	-1.20957	1	1
FBtr0345063	FBgn0266692	-	467	0.185584	0.208185	-0.165797	1	1
FBtr0290024	FBgn0036173	-	890	7.63439	6.92485	0.140731	0.87655	0.999568
FBtr0290025	FBgn0035793	-	4841	0	0	0	1	1
FBtr0290026	FBgn0035793	-	5282	0.800505	1.36534	-0.770282	0.47485	0.999568
FBtr0345062	FBgn0266692	-	583	0	0.0562344	#NAME?	1	1
FBtr0290021	FBgn0030575	-	1780	1.00662	0.853346	0.238312	0.78085	0.999568
FBtr0290022	FBgn0262514	-	672	0.294179	0.363565	-0.30552	0.88935	0.999568
FBtr0290023	FBgn0038603	-	3611	0	5.27e-05	#NAME?	1	1
FBtr0347146	FBgn0036461	-	2391	6.58073	5.52173	0.253129	0.6723	0.999568
FBtr0347147	FBgn0260744	-	3673	18.3112	18.9808	-0.0518176	0.88865	0.999568
FBtr0347140	FBgn0267668	-	3432	0.855292	0.537	0.671495	1	1
FBtr0347148	FBgn0027083	-	4314	0.284182	0.241095	0.237213	1	1
FBtr0347149	FBgn0038063	-	6672	1.25614	1.25961	-0.0039759	0.9917	0.999568
TCONS_00657729	XLOC_161541	-	205	0	0.607437	#NAME?	1	1
FBtr0332261	FBgn0263197	-	6150	1.49456	1.47044	0.0234743	0.9747	0.999568
FBtr0299542	FBgn0036656	-	599	2.54965	0.774165	1.71959	1	1
FBtr0299543	FBgn0030559	-	1367	1.49238	0.794979	0.908624	0.5473	0.999568
FBtr0299544	FBgn0085399	-	4377	0.189045	0.000136575	10.4348	1	1
FBtr0299546	FBgn0265296	-	3476	0.0682048	0.0784432	-0.201775	1	1
FBtr0299547	FBgn0265296	-	3631	0.0851626	0.0775944	0.134269	1	1
FBtr0299548	FBgn0265296	-	6195	0.0134901	0.000148371	6.50655	1	1
FBtr0299549	FBgn0265296	-	8863	0	0	0	1	1
FBtr0332263	FBgn0263197	-	5742	0.647224	0.417627	0.63205	0.66935	0.999568
FBtr0345068	FBgn0085446	-	17173	0.127213	0.413347	-1.70011	0.10635	0.999568
FBtr0077279	FBgn0003300	-	2474	0.0558725	0.0597867	-0.0976864	1	1
FBtr0332262	FBgn0263197	-	6168	0	0.203257	#NAME?	1	1
FBtr0077271	FBgn0031141	-	893	28.9696	18.6687	0.633919	0.01295	0.642778
FBtr0077272	FBgn0011834	-	901	91.3521	59.7582	0.612302	0.0027	0.231618
FBtr0077273	FBgn0031139	-	2498	0.191403	0.12739	0.587365	1	1
FBtr0077274	FBgn0031139	-	2531	0.18507	0.146401	0.33815	1	1
FBtr0077275	FBgn0031139	-	2416	0.14053	0.184116	-0.389736	1	1
FBtr0077276	FBgn0031126	-	2993	28.0731	32.3939	-0.206536	0.4596	0.999568
FBtr0077277	FBgn0031127	-	663	0.144373	1.57e-05	13.1702	1	1
FBtr0332267	FBgn0013467	-	2713	0	0.0780494	#NAME?	1	1
TCONS_00210313	XLOC_054199	-	366	1.39888	1.73245	-0.308534	0.89695	0.999568
TCONS_00210311	XLOC_054197	-	245	2.46546	2.48346	-0.0104898	0.9028	0.999568
FBtr0332266	FBgn0263197	-	6177	3.58054	5.55411	-0.633378	0.1852	0.999568
FBtr0343336	FBgn0034971	-	1985	0.359565	0.0811615	2.14738	0.645	0.999568
FBtr0343334	FBgn0025806	-	574	0	0	0	1	1
FBtr0072738	FBgn0041342	-	2486	29.7096	24.7648	0.262638	1	1
FBtr0072739	FBgn0041342	-	2529	1.24051	1.57173	-0.341424	0.7453	0.999568
FBtr0072732	FBgn0052318	-	785	11.8424	14.6498	-0.306922	0.3005	0.999568
FBtr0072733	FBgn0004378	-	3871	33.3128	42.1328	-0.338868	0.0801	0.999568
FBtr0072730	FBgn0010333	-	1718	4.17862	2.28351	0.871774	1	1
FBtr0072731	FBgn0035194	-	692	49.7733	52.0378	-0.0641855	0.7816	0.999568
FBtr0072736	FBgn0035229	-	5382	0.82145	0.819456	0.00350628	0.99765	0.999568
FBtr0072737	FBgn0035229	-	5610	3.2408	3.5084	-0.114466	0.816	0.999568
FBtr0072734	FBgn0035193	-	1187	0.902416	0.844693	0.0953651	0.96905	0.999568
FBtr0072735	FBgn0035229	-	5390	14.8546	17.3353	-0.222805	0.30905	0.999568
FBtr0074779	FBgn0031026	-	711	0.16781	0.183067	-0.125541	1	1
FBtr0074774	FBgn0031030	-	2099	58.0885	71.6122	-0.301951	1	1
FBtr0074775	FBgn0026430	-	3313	0.110693	0.10024	0.143108	1	1
FBtr0074776	FBgn0026430	-	3253	1.2328	1.28669	-0.0617165	0.97295	0.999568
FBtr0074777	FBgn0026430	-	3154	62.1799	71.1628	-0.194674	1	1
FBtr0332463	FBgn0003382	-	5871	0.0954997	0.112259	-0.233264	1	1
FBtr0074771	FBgn0031030	-	4035	40.4206	51.0688	-0.33735	1	1
FBtr0074772	FBgn0031030	-	3685	1.53684	1.51243	0.023094	0.99055	0.999568
FBtr0074773	FBgn0031030	-	2238	5.20969	5.30213	-0.0253732	0.98465	0.999568
FBtr0074198	FBgn0030685	-	4304	3.47798	2.7549	0.336248	0.6596	0.999568
FBtr0339738	FBgn0033783	-	2695	27.6955	29.6786	-0.0997732	1	1
FBtr0087902	FBgn0033716	-	1257	35.6418	31.9092	0.159595	0.44625	0.999568
FBtr0087905	FBgn0050047	-	2809	1.6775	1.09519	0.615127	0.0876	0.999568
FBtr0087904	FBgn0266111	-	6284	30.127	34.8881	-0.211679	0.26305	0.999568
FBtr0087907	FBgn0050043	-	3082	0.527005	0.252059	1.06406	0.0262	0.959943
FBtr0087906	FBgn0050049	-	2796	2.14104	1.63083	0.392707	0.23745	0.999568
FBtr0074190	FBgn0025809	-	1507	23.7259	25.2594	-0.0903584	0.70185	0.999568
FBtr0074191	FBgn0025809	-	1435	6.857	7.30923	-0.0921406	0.8409	0.999568
FBtr0074192	FBgn0030691	-	2559	0.185609	0.254324	-0.454399	1	1
FBtr0074193	FBgn0030688	-	902	74.9227	46.8053	0.67873	0.05765	0.999568
FBtr0074194	FBgn0030685	-	4077	2.0213	1.48223	0.447508	0.67935	0.999568
FBtr0339737	FBgn0265427	-	629	0.284229	0.289317	-0.0255971	1	1
FBtr0332285	FBgn0029666	-	4744	3.4843	3.48669	-0.000989313	0.9977	0.999568
FBtr0074197	FBgn0030685	-	4362	1.50274	1.20727	0.315851	0.78275	0.999568
FBtr0336904	FBgn0085443	-	6738	0.113144	0.182474	-0.689531	1	1
FBtr0336905	FBgn0030164	-	1241	1.28994	0.817129	0.658668	0.47585	0.999568
FBtr0336906	FBgn0030164	-	1227	0.161507	0	inf	1	1
FBtr0336907	FBgn0030163	-	1176	0.25362	0.509337	-1.00595	0.5821	0.999568
FBtr0336901	FBgn0052687	-	2803	0.349833	0.59928	-0.776562	0.64495	0.999568
FBtr0336902	FBgn0085443	-	3089	0.395442	0.207348	0.931408	0.72275	0.999568
FBtr0336903	FBgn0085443	-	2896	0.107188	0	inf	1	1
Novel000094.1	Novel000094	-	1102	3.10823	3.54997	-0.191713	0.87385	0.999568
FBtr0336908	FBgn0260991	-	2459	47.2228	58.6313	-0.312186	1	1
FBtr0336909	FBgn0033160	-	2610	45.3426	46.9752	-0.0510346	1	1
FBtr0075823	FBgn0036369	-	1070	3.64123	2.15222	0.758598	0.188	0.999568
FBtr0075822	FBgn0036369	-	1569	0.525252	0.482586	0.122225	0.91525	0.999568
FBtr0075821	FBgn0036369	-	1518	2.69e-05	0	inf	1	1
FBtr0075820	FBgn0036369	-	2045	0.00306771	0.000367939	3.05962	1	1
FBtr0075825	FBgn0036366	-	1097	33.9514	35.7195	-0.0732375	0.80655	0.999568
FBtr0075824	FBgn0036367	-	918	31.6455	18.9152	0.742454	0.0323	0.999568
TCONS_00465445	XLOC_124275	-	203	0	0	0	1	1
FBtr0080485	FBgn0032484	-	2497	0.859122	0.448226	0.938638	0.5715	0.999568
FBtr0080484	FBgn0032485	-	3184	26.2098	30.3011	-0.209263	0.2863	0.999568
FBtr0080487	FBgn0032483	-	1042	2.13124	2.00928	0.0850108	0.9724	0.999568
FBtr0080481	FBgn0032493	-	863	0.131305	0.0475126	1.46654	1	1
FBtr0080480	FBgn0051730	-	680	0.248184	0.258214	-0.0571596	1	1
FBtr0080483	FBgn0032487	-	911	37.1832	36.8617	0.0125315	0.965	0.999568
FBtr0080482	FBgn0032489	-	656	0.450958	0.47774	-0.083234	1	1
FBtr0080489	FBgn0032479	-	4365	61.7013	66.9572	-0.117938	0.56345	0.999568
FBtr0080488	FBgn0032481	-	5882	8.06174	10.0385	-0.316377	0.3695	0.999568
FBtr0346676	FBgn0052823	-	2200	0.2695	0.386686	-0.520878	1	1
FBtr0081688	FBgn0000552	-	652	0.187112	0.240699	-0.363326	1	1
FBtr0081689	FBgn0004777	-	1097	0.15597	0.0876263	0.831834	1	1
FBtr0081681	FBgn0037462	-	921	0	0.0650451	#NAME?	1	1
FBtr0081682	FBgn0051286	-	1834	0.0633768	0.0870072	-0.45718	1	1
FBtr0081684	FBgn0010355	-	6552	10.3979	10.016	0.0539816	0.87755	0.999568
FBtr0081685	FBgn0010355	-	6744	2.60013	0.244534	3.41048	0.20045	0.999568
FBtr0081686	FBgn0010355	-	6651	0.939192	3.11286	-1.72875	0.256	0.999568
FBtr0081687	FBgn0262801	-	855	89.527	87.9927	0.0249379	0.91315	0.999568
TCONS_00730507	XLOC_176743	-	209	1.88575	0	inf	1	1
FBtr0089086	FBgn0025936	-	5630	0.52667	0.436701	0.270253	0.9048	0.999568
FBtr0089084	FBgn0025936	-	4190	0	0	0	1	1
FBtr0089085	FBgn0025936	-	3691	40.8785	42.9888	-0.0726178	0.78475	0.999568
FBtr0089082	FBgn0025936	-	4142	29.7252	29.6513	0.003592	1	1
FBtr0089083	FBgn0025936	-	4068	9.10063	6.93015	0.393079	0.5123	0.999568
FBtr0089080	FBgn0039911	-	2374	2.00211	1.14422	0.80715	0.0982	0.999568
FBtr0081532	FBgn0051544	-	792	0.115091	0.184592	-0.681565	1	1
FBtr0081534	FBgn0037503	-	1230	0.149415	0.122098	0.291279	1	1
FBtr0081538	FBgn0003885	-	1980	49.1687	49.6742	-0.0147556	0.93985	0.999568
FBtr0334508	FBgn0004573	-	4486	0.196478	0.121717	0.690835	1	1
FBtr0334509	FBgn0038100	-	1045	37.6382	42.324	-0.169279	0.681	0.999568
FBtr0334506	FBgn0051109	-	978	4.37913	3.39078	0.369027	0.599	0.999568
FBtr0334507	FBgn0039261	-	2862	38.1384	43.6707	-0.195421	0.3821	0.999568
FBtr0334504	FBgn0039266	-	1721	2.96229	1.7854	0.730468	0.5296	0.999568
FBtr0334505	FBgn0266719	-	3671	1.42687	1.0544	0.436423	0.6314	0.999568
FBtr0334502	FBgn0039065	-	1491	2.69	0.96885	1.47326	0.46555	0.999568
FBtr0334503	FBgn0039265	-	1040	0.768068	0.212361	1.85471	0.6456	0.999568
FBtr0334500	FBgn0039065	-	1500	8.13378	9.87929	-0.280482	1	1
FBtr0334501	FBgn0039065	-	1497	16.6247	17.8179	-0.0999958	0.8246	0.999568
FBtr0084339	FBgn0051281	-	1491	0.01305	0.0546658	-2.06658	1	1
FBtr0084338	FBgn0039030	-	1112	24.9171	16.9953	0.551999	0.03135	0.999568
FBtr0084337	FBgn0017590	-	4052	0.814237	0.595535	0.451263	0.521	0.999568
FBtr0084336	FBgn0046114	-	1211	166.873	156.464	0.0929237	1	1
FBtr0084334	FBgn0039003	-	2671	13.1242	14.1501	-0.108593	0.65225	0.999568
FBtr0084333	FBgn0039007	-	1249	0.226949	0.209007	0.118815	1	1
FBtr0084330	FBgn0039010	-	2919	0.231184	0.168611	0.455349	1	1
FBtr0076844	FBgn0011640	-	1758	0.553287	0.775558	-0.487206	0.8901	0.999568
FBtr0076845	FBgn0011640	-	2087	1.89618	1.34902	0.491185	0.79715	0.999568
FBtr0076846	FBgn0019662	-	1934	1.14626	1.88867	-0.720441	0.72685	0.999568
FBtr0076847	FBgn0035771	-	2944	86.0299	87.3121	-0.0213433	0.90795	0.999568
FBtr0076841	FBgn0011640	-	1837	19.9093	22.5706	-0.181	0.72455	0.999568
FBtr0076842	FBgn0011640	-	1650	28.956	30.9146	-0.0944232	0.8381	0.999568
FBtr0076843	FBgn0011640	-	1784	1.76214	2.01631	-0.194389	0.9246	0.999568
FBtr0076848	FBgn0082598	-	1268	116.038	130.262	-0.16682	1	1
FBtr0076849	FBgn0082598	-	2080	44.224	42.3464	0.0625925	0.8572	0.999568
Novel000191.1	Novel000191	-	218	0.52819	0	inf	1	1
FBtr0084481	FBgn0039094	-	1330	21.5866	19.5639	0.141943	0.53855	0.999568
FBtr0084480	FBgn0051145	-	2595	0.279893	0.0520398	2.42719	1	1
FBtr0084486	FBgn0039091	-	2212	34.7919	24.6497	0.49718	0.0164	0.736798
FBtr0334959	FBgn0038243	-	703	41.5603	32.2721	0.364918	1	1
FBtr0334958	FBgn0264903	-	281	0.378119	0.344628	0.133799	1	1
Novel000185.1	Novel000185	-	211	1.2431	0	inf	1	1
TCONS_00749962	XLOC_163217	-	215	1.69562	0	inf	1	1
FBtr0330670	FBgn0014010	-	1775	0.121145	0	inf	1	1
FBtr0083599	FBgn0038596	-	494	0.981609	0.523146	0.907933	0.5531	0.999568
FBtr0083596	FBgn0010877	-	2634	0	0	0	1	1
FBtr0083597	FBgn0038598	-	2040	0.529604	0.523079	0.0178855	0.9904	0.999568
FBtr0083594	FBgn0038601	-	1414	54.4309	48.0918	0.178634	0.3651	0.999568
FBtr0083595	FBgn0010877	-	3277	26.8048	31.4478	-0.230469	0.2313	0.999568
FBtr0083592	FBgn0038603	-	3662	0.372644	0.424283	-0.18723	0.896	0.999568
FBtr0083593	FBgn0038602	-	615	0.168145	0.0748566	1.16751	1	1
FBtr0083591	FBgn0038603	-	3643	0	0	0	1	1
FBtr0076146	FBgn0003292	-	3268	15.337	18.6381	-0.281242	0.16695	0.999568
FBtr0087686	FBgn0033853	-	2260	25.0476	19.9495	0.328321	0.39645	0.999568
FBtr0087687	FBgn0033853	-	1826	7.97252	3.2364	1.30065	0.19515	0.999568
FBtr0087684	FBgn0053156	-	1824	35.6861	41.8411	-0.229558	0.48255	0.999568
FBtr0087685	FBgn0033853	-	2213	18.799	19.8898	-0.0813794	0.84215	0.999568
FBtr0087682	FBgn0053156	-	1874	6.10729	7.7726	-0.347866	0.6563	0.999568
FBtr0087683	FBgn0053156	-	2330	3.84619	4.51914	-0.232619	0.7925	0.999568
FBtr0087681	FBgn0053156	-	2030	3.14293	1.91403	0.715498	0.5799	0.999568
FBtr0334957	FBgn0020299	-	3643	4.15e-05	0	inf	1	1
FBtr0334956	FBgn0020299	-	4594	0.572438	0.235102	1.28383	0.16365	0.999568
FBtr0339358	FBgn0265309	-	1192	0.157133	0.142672	0.13929	1	1
FBtr0339359	FBgn0005638	-	2581	0.106106	0.000282195	8.5546	1	1
TCONS_00055998	XLOC_040496	-	210	1.20194	0.565699	1.08726	1	1
FBtr0332848	FBgn0052512	-	1412	0.542367	0.490259	0.145726	0.9398	0.999568
FBtr0344467	FBgn0031126	-	2800	10.0433	9.6592	0.0562531	0.91295	0.999568
FBtr0346944	FBgn0267539	-	710	0.135298	0	inf	1	1
FBtr0332841	FBgn0004373	-	6109	4.51904	5.2166	-0.207092	0.69115	0.999568
FBtr0332840	FBgn0052343	-	2131	0.00739507	0	inf	1	1
TCONS_00479739	XLOC_107309	-	360	2.17005	2.0586	0.0760614	0.88045	0.999568
FBtr0308746	FBgn0263322	-	596	0.044653	0.0783732	-0.811603	1	1
FBtr0308745	FBgn0263321	-	591	35.8592	18.1796	0.980026	1	1
FBtr0308744	FBgn0263320	-	508	5.5e-06	0.0993455	-14.1396	1	1
TCONS_00938549	XLOC_188198	-	203	6.04001	3.71163	0.7025	1	1
TCONS_00938545	XLOC_188187	-	223	5.852	4.52971	0.369512	1	1
FBtr0089908	FBgn0032455	-	1194	79.3033	82.4634	-0.0563734	0.8976	0.999568
FBtr0308748	FBgn0034670	-	790	2.44556	1.56095	0.647746	0.15395	0.999568
FBtr0309298	FBgn0035755	-	2038	0	0.053861	#NAME?	1	1
FBtr0309299	FBgn0035755	-	1773	1.29408	5.49e-05	14.5241	0.1458	0.999568
FBtr0309294	FBgn0013305	-	1727	0.15416	0	inf	1	1
FBtr0309295	FBgn0013305	-	1634	0	0	0	1	1
TCONS_00041211	XLOC_017662	-	206	1.41138	1.77535	-0.330992	1	1
TCONS_00967478	XLOC_197979	-	200	0	2.22223	#NAME?	1	1
FBtr0086227	FBgn0034529	-	4602	5.22828	6.22986	-0.252863	0.28065	0.999568
FBtr0086226	FBgn0034527	-	1925	3.22751	2.76676	0.222226	0.85625	0.999568
FBtr0086225	FBgn0034527	-	1949	35.1555	37.7443	-0.102507	0.71975	0.999568
FBtr0342597	FBgn0265798	-	1073	0.16645	0.0608408	1.45198	1	1
FBtr0086222	FBgn0267791	-	1342	0.153269	0.331419	-1.11259	1	1
FBtr0086221	FBgn0267791	-	2127	1.45412	1.64953	-0.181915	0.8943	0.999568
FBtr0086220	FBgn0267791	-	2076	57.9716	58.9612	-0.0244197	0.90455	0.999568
Novel000239.1	Novel000239	-	269	0	0.407773	#NAME?	1	1
FBtr0086229	FBgn0034532	-	1917	0.416557	0.496018	-0.251879	0.93115	0.999568
FBtr0081949	FBgn0037613	-	610	21.436	18.2739	0.230249	1	1
FBtr0081948	FBgn0037620	-	1159	17.9416	19.4422	-0.11589	0.69085	0.999568
FBtr0078479	FBgn0004514	-	3682	1.03232	0.342057	1.59358	0.2104	0.999568
FBtr0078478	FBgn0000045	-	1543	42.2272	23.1421	0.867653	0.0002	0.0338077
FBtr0078477	FBgn0037146	-	2868	85.3464	64.2047	0.410651	1	1
FBtr0081942	FBgn0037627	-	1271	3.34178	2.51356	0.410886	0.2703	0.999568
FBtr0078475	FBgn0037144	-	2166	30.3446	32.9046	-0.11685	0.5556	0.999568
FBtr0081940	FBgn0053189	-	677	0.983413	0.979904	0.00515753	0.90805	0.999568
FBtr0081947	FBgn0037621	-	1519	41.3005	42.7152	-0.0485894	0.8076	0.999568
FBtr0081946	FBgn0037623	-	3294	1.27185	2.11018	-0.730434	0.28915	0.999568
FBtr0078471	FBgn0037140	-	2085	8.8683	6.01253	0.560685	0.3479	0.999568
FBtr0081944	FBgn0037623	-	3476	10.9468	10.6734	0.0364873	0.8713	0.999568
TCONS_00038856	XLOC_014367	-	262	0.251334	1.97137	-2.97152	0.4863	0.999568
TCONS_00548007	XLOC_123636	-	223	0.447178	2.04481	-2.19305	0.5662	0.999568
FBtr0303845	FBgn0026059	-	2015	0.353126	0.335137	0.0754328	1	1
FBtr0303844	FBgn0030018	-	4945	17.6532	22.7443	-0.365576	0.1406	0.999568
FBtr0303847	FBgn0002709	-	4420	0.194527	0.100038	0.959422	1	1
FBtr0303846	FBgn0034390	-	1255	15.9274	12.7999	0.315385	0.45215	0.999568
FBtr0303841	FBgn0038069	-	1379	0.134089	0.174206	-0.377609	1	1
FBtr0303840	FBgn0038068	-	1330	0.124921	0.11105	0.169802	1	1
FBtr0303843	FBgn0030018	-	5594	2.34228	2.42739	-0.0514918	0.942	0.999568
FBtr0303842	FBgn0030018	-	5165	0.635031	1.37643	-1.11603	0.3623	0.999568
FBtr0303849	FBgn0039140	-	2712	6.5308	4.50454	0.535881	0.4664	0.999568
FBtr0303848	FBgn0028581	-	5005	7.96135	10.8222	-0.44291	0.1894	0.999568
TCONS_00997205	XLOC_214230	-	209	1.88575	0	inf	1	1
TCONS_00020903	XLOC_025525	-	215	1.59849	0.475806	1.74826	1	1
TCONS_00419973	XLOC_097475	-	686	2.15428	1.73091	0.315678	0.5054	0.999568
FBtr0303599	FBgn0025702	-	3919	0	0	0	1	1
TCONS_00265327	XLOC_067962	-	219	0.973826	2.20121	-1.17656	0.4025	0.999568
TCONS_00362900	XLOC_051270	-	504	2.44736	3.68113	-0.588921	0.86475	0.999568
Novel000137.1	Novel000137	-	205	0	0	0	1	1
TCONS_01018477	XLOC_223902	-	262	67.4934	64.173	0.0727801	0.88085	0.999568
FBtr0306301	FBgn0037556	-	2536	3.27809	4.04979	-0.304994	0.5487	0.999568
FBtr0091719	FBgn0064126	-	1547	0.652294	0.664204	-0.026104	0.98845	0.999568
FBtr0091718	FBgn0053721	-	546	0	0.0450644	#NAME?	1	1
FBtr0091717	FBgn0046874	-	4148	0.68903	0.640887	0.104496	0.95825	0.999568
FBtr0091716	FBgn0046874	-	6324	0.468849	1.01359	-1.11228	0.51105	0.999568
FBtr0091711	FBgn0260458	-	3010	0	0	0	1	1
FBtr0091710	FBgn0260458	-	3563	1.06424	0.692566	0.6198	0.531	0.999568
FBtr0306305	FBgn0262891	-	588	0	0.120233	#NAME?	1	1
FBtr0306304	FBgn0262890	-	1164	5.72e-05	5.75e-05	-0.00759922	1	1
FBtr0087352	FBgn0024754	-	1830	8.98363	9.29799	-0.0496195	0.92145	0.999568
FBtr0303339	FBgn0030328	-	2986	0.117313	0.270225	-1.2038	1	1
FBtr0303338	FBgn0030328	-	2784	4.85251	7.75037	-0.675535	0.1449	0.999568
FBtr0303337	FBgn0030328	-	2945	2.43693	2.84921	-0.225497	0.73465	0.999568
FBtr0303336	FBgn0030328	-	2704	2.83366	3.67194	-0.373877	0.56915	0.999568
FBtr0303335	FBgn0030329	-	1740	1.25866	2.13427	-0.761854	0.5274	0.999568
FBtr0303334	FBgn0030329	-	1746	0.861013	0.289862	1.57067	0.54125	0.999568
FBtr0347308	FBgn0267730	-	1214	0.1425	0.139492	0.0307823	1	1
FBtr0347309	FBgn0267731	-	512	0.328657	0.347418	-0.0800868	0.9197	0.999568
FBtr0347302	FBgn0085362	-	1960	0.40594	0.8848	-1.12408	0.55375	0.999568
TCONS_00010013	XLOC_008538	-	220	0.326208	0	inf	1	1
FBtr0347306	FBgn0267751	-	2574	0.778036	0.58563	0.409847	0.42755	0.999568
FBtr0347307	FBgn0267729	-	615	0.760306	0.637107	0.255045	0.9124	0.999568
FBtr0347305	FBgn0267750	-	617	0	0	0	1	1
FBtr0305658	FBgn0039900	-	2596	0.232524	0.130173	0.836947	1	1
FBtr0305656	FBgn0003721	-	1318	2.17155	1.25611	0.789769	0.819	0.999568
FBtr0305657	FBgn0053300	-	5253	0.0931203	0.0846264	0.137989	1	1
FBtr0305654	FBgn0003721	-	1503	0.382338	0.153021	1.32112	0.58845	0.999568
FBtr0305655	FBgn0003721	-	752	1.63018	1.52752	0.0938389	0.92635	0.999568
FBtr0305652	FBgn0003638	-	3609	0.42699	0.171048	1.3198	0.72795	0.999568
FBtr0305653	FBgn0033484	-	3834	0.195288	0.183409	0.09054	1	1
FBtr0305650	FBgn0266569	-	486	30.3489	27.0535	0.165826	1	1
FBtr0305651	FBgn0003638	-	3478	0.0748473	0.305369	-2.02853	1	1
FBtr0300026	FBgn0041232	-	1116	0.152762	0.17165	-0.168186	1	1
FBtr0347108	FBgn0267650	-	2367	0.906445	0.447137	1.0195	0.77725	0.999568
TCONS_00227050	XLOC_079875	-	221	1.48497	0.439099	1.75782	1	1
FBtr0300025	FBgn0051785	-	1487	0.310714	0.232664	0.41734	1	1
FBtr0300020	FBgn0016076	-	3455	13.2513	9.06987	0.546977	1	1
FBtr0300021	FBgn0041103	-	948	0.161526	0.251686	-0.639857	1	1
FBtr0300028	FBgn0085271	-	343	40.4101	29.3992	0.458938	0.1813	0.999568
TCONS_00242858	XLOC_066509	-	972	0.832928	1.07744	-0.371347	0.45515	0.999568
FBtr0347101	FBgn0267645	-	361	0.729465	0.376027	0.956003	1	1
TCONS_00538898	XLOC_104956	-	207	1.33631	1.18764	0.170149	0.64175	0.999568
FBtr0347105	FBgn0028734	-	2896	4.04378	7.48775	-0.888826	0.19565	0.999568
FBtr0078994	FBgn0031657	-	1153	43.4171	39.7291	0.128069	0.7337	0.999568
FBtr0078995	FBgn0031659	-	1986	30.8296	34.9742	-0.181973	0.54485	0.999568
FBtr0078996	FBgn0031660	-	1138	75.1361	69.0015	0.122877	1	1
FBtr0078997	FBgn0031662	-	1194	54.2996	53.1865	0.0298831	0.90335	0.999568
FBtr0078990	FBgn0031650	-	1318	0.296908	0.126875	1.22661	1	1
FBtr0078991	FBgn0015000	-	1784	26.8477	25.5276	0.0727433	0.7875	0.999568
FBtr0078992	FBgn0031655	-	2411	18.2347	19.9654	-0.13082	0.5348	0.999568
FBtr0340332	FBgn0034321	-	711	0.175798	0.243568	-0.470411	1	1
FBtr0340333	FBgn0034325	-	590	0	0.200374	#NAME?	1	1
FBtr0340330	FBgn0265594	-	500	0.172419	0.258187	-0.582496	1	1
FBtr0300519	FBgn0259174	-	4454	4.88827	4.98093	-0.027092	0.9707	0.999568
FBtr0340336	FBgn0265595	-	4261	0.0617521	0.0221371	1.48002	1	1
FBtr0340337	FBgn0265595	-	2831	0	0.146674	#NAME?	1	1
FBtr0340334	FBgn0265593	-	637	0	0.0711596	#NAME?	1	1
FBtr0340335	FBgn0265595	-	4394	0.0162145	0.0811243	-2.32285	1	1
FBtr0300680	FBgn0034645	-	405	157.854	136.674	0.207852	0.56755	0.999568
FBtr0300681	FBgn0039116	-	938	3.11379	3.09557	0.00846652	0.99555	0.999568
FBtr0300687	FBgn0039329	-	3310	0.349642	0.791652	-1.17899	0.2815	0.999568
FBtr0300685	FBgn0037531	-	2985	7.49972	9.26357	-0.304731	1	1
FBtr0300688	FBgn0036052	-	2233	1.50455	1.54428	-0.0375986	0.9604	0.999568
FBtr0300689	FBgn0031208	-	1880	2.6195	2.26731	0.208313	0.5545	0.999568
FBtr0337037	FBgn0038603	-	1537	3.36647	1.90448	0.821837	0.2186	0.999568
FBtr0331965	FBgn0034031	-	821	0.220297	0.330943	-0.587131	1	1
FBtr0331963	FBgn0034031	-	771	1.68639	1.69101	-0.00394648	0.9902	0.999568
FBtr0331962	FBgn0264330	-	238	0	0	0	1	1
FBtr0301375	FBgn0028371	-	1939	0.380181	0.203431	0.902145	0.79255	0.999568
FBtr0301374	FBgn0028371	-	9430	1.25057	1.18232	0.0809633	0.8805	0.999568
FBtr0301377	FBgn0028371	-	5989	0.62431	0.815053	-0.384631	0.6931	0.999568
FBtr0301376	FBgn0028371	-	1845	0.681892	0.41981	0.699806	0.72275	0.999568
FBtr0301371	FBgn0011225	-	4550	0	0	0	1	1
FBtr0301370	FBgn0011225	-	4279	16.2567	13.5262	0.265285	1	1
FBtr0301372	FBgn0033725	-	1733	0.106133	0.0530092	1.00155	1	1
FBtr0331960	FBgn0003091	-	4711	1.63101	1.5559	0.0680114	0.85995	0.999568
FBtr0301379	FBgn0024963	-	1770	0.536203	0	inf	0.12415	0.999568
FBtr0301378	FBgn0024963	-	1650	0.582944	1.06959	-0.875626	0.4449	0.999568
FBtr0306684	FBgn0033766	-	5786	27.1307	29.2718	-0.109586	0.5578	0.999568
FBtr0306685	FBgn0082582	-	2299	2.52681	1.49549	0.756697	0.36295	0.999568
FBtr0306686	FBgn0082582	-	2699	0	0	0	1	1
FBtr0306687	FBgn0082582	-	3484	0.233727	0.121584	0.942872	1	1
FBtr0345216	FBgn0039487	-	2190	0	0	0	1	1
FBtr0306681	FBgn0028935	-	2901	0.108959	0.0702568	0.633073	1	1
FBtr0306682	FBgn0035813	-	4388	0.254213	0.196826	0.369119	1	1
FBtr0306683	FBgn0036380	-	1878	0.125858	0.197305	-0.648631	1	1
FBtr0345218	FBgn0039213	-	2907	8.38877	7.50869	0.159899	1	1
FBtr0345219	FBgn0038294	-	2827	0.522397	0.368149	0.504854	0.8875	0.999568
FBtr0306688	FBgn0033504	-	2384	0.424268	0.129658	1.71026	0.51705	0.999568
FBtr0300974	FBgn0030882	-	1789	0	0	0	1	1
FBtr0300975	FBgn0052495	-	2151	0	0	0	1	1
FBtr0300976	FBgn0052495	-	1337	0	0	0	1	1
FBtr0300977	FBgn0052495	-	1804	0	0	0	1	1
FBtr0300970	FBgn0030882	-	1804	0	0	0	1	1
FBtr0300971	FBgn0030882	-	1337	0	0	0	1	1
FBtr0300972	FBgn0030882	-	2002	0	0	0	1	1
FBtr0300973	FBgn0030882	-	2151	0	0	0	1	1
FBtr0300978	FBgn0052495	-	1938	0	0	0	1	1
FBtr0300979	FBgn0052495	-	2002	0	0	0	1	1
FBtr0301089	FBgn0011476	-	460	49.5154	46.4981	0.0907069	1	1
FBtr0301088	FBgn0039065	-	1671	3.0862	7.20561	-1.22329	0.13625	0.999568
FBtr0301087	FBgn0031296	-	1288	0.817035	0.349788	1.22392	0.6906	0.999568
FBtr0301085	FBgn0039075	-	4648	0.825756	0.735115	0.167747	1	1
FBtr0301084	FBgn0029791	-	3372	0.211118	0.251668	-0.253476	1	1
FBtr0301083	FBgn0029791	-	3920	0.880493	0.771744	0.190189	0.82415	0.999568
FBtr0299586	FBgn0016797	-	4597	1.35838	1.05697	0.36196	0.5753	0.999568
FBtr0301081	FBgn0085417	-	1989	0.264916	0.136603	0.955552	1	1
TCONS_00992663	XLOC_205119	-	578	0.152549	0.356284	-1.22375	1	1
FBtr0299587	FBgn0061200	-	7927	13.1746	16.3214	-0.30901	0.28105	0.999568
FBtr0345357	FBgn0022238	-	958	2.02568	1.13025	0.841765	0.48615	0.999568
FBtr0111152	FBgn0058470	-	2990	3.38185	2.55531	0.404314	0.16585	0.999568
FBtr0299581	FBgn0086899	-	7243	8.29415	9.57824	-0.207667	0.65355	0.999568
TCONS_00955482	XLOC_216228	-	276	2.07277	1.1033	0.909738	0.74305	0.999568
FBtr0299582	FBgn0086899	-	5890	0	0	0	1	1
FBtr0299583	FBgn0086899	-	4673	11.9075	17.8839	-0.586797	0.2023	0.999568
FBtr0333374	FBgn0259173	-	5246	0.120304	0.124736	-0.052196	1	1
FBtr0345356	FBgn0034588	-	2134	4.39539	2.49377	0.81766	1	1
FBtr0333375	FBgn0259173	-	5383	0.248567	0.181307	0.455199	1	1
FBtr0100340	FBgn0004903	-	2828	3.27639	2.9908	0.131575	0.8393	0.999568
FBtr0100342	FBgn0005561	-	4201	0.033439	0	inf	1	1
FBtr0100345	FBgn0005561	-	2257	0	0.131813	#NAME?	1	1
FBtr0100344	FBgn0005561	-	2749	0.860217	0.461778	0.8975	0.66845	0.999568
FBtr0100346	FBgn0005561	-	4501	0.164949	0.205879	-0.319775	1	1
FBtr0111240	FBgn0086683	-	1354	5.94659	6.40187	-0.10643	0.8847	0.999568
FBtr0111241	FBgn0086683	-	1257	1.5475	2.05314	-0.407892	0.82425	0.999568
FBtr0111246	FBgn0041004	-	1501	0.052301	0.177339	-1.7616	1	1
FBtr0111247	FBgn0041004	-	5581	0.639454	0.488684	0.387939	0.782	0.999568
FBtr0111244	FBgn0041004	-	1745	0	0	0	1	1
FBtr0111245	FBgn0041004	-	1624	35.0184	34.7173	0.0124565	0.97235	0.999568
FBtr0111248	FBgn0041004	-	1804	26.9013	29.5968	-0.137764	0.69015	0.999568
FBtr0111249	FBgn0041004	-	4284	1.9113	1.40689	0.442043	0.62225	0.999568
FBtr0332913	FBgn0004607	-	10141	1.94401	1.66008	0.227784	0.661	0.999568
FBtr0332912	FBgn0033212	-	5298	14.4547	17.6246	-0.286055	0.2479	0.999568
FBtr0332911	FBgn0033212	-	6319	2.60874	2.76626	-0.0845817	0.8739	0.999568
FBtr0332910	FBgn0034792	-	2940	3.25459	3.08941	0.0751416	0.91265	0.999568
FBtr0332917	FBgn0004907	-	1760	1.28461	0	inf	0.16905	0.999568
FBtr0332916	FBgn0004907	-	2924	0	0	0	1	1
FBtr0332915	FBgn0011241	-	766	1.51226	1.30483	0.212841	0.939	0.999568
FBtr0332914	FBgn0050010	-	873	10.9687	9.91914	0.145104	0.8667	0.999568
FBtr0332918	FBgn0033904	-	998	15.4203	8.3091	0.892062	1	1
FBtr0345354	FBgn0034543	-	599	22.2003	15.374	0.530083	1	1
FBtr0302859	FBgn0261573	-	2085	19.8683	23.6384	-0.250669	0.51265	0.999568
FBtr0306538	FBgn0067779	-	3454	6.45927	7.81632	-0.275118	0.67975	0.999568
FBtr0306539	FBgn0067779	-	4153	0.496148	0.455974	0.121819	0.9617	0.999568
FBtr0306536	FBgn0067779	-	3731	15.719	16.1006	-0.034609	1	1
FBtr0302854	FBgn0263235	-	886	14.8151	9.70625	0.610085	1	1
FBtr0306534	FBgn0035533	-	3507	0	0.000199795	#NAME?	1	1
FBtr0302856	FBgn0039003	-	2668	3.97486	5.06442	-0.349493	0.4179	0.999568
FBtr0302850	FBgn0027341	-	2628	0	0	0	1	1
FBtr0302853	FBgn0051262	-	2001	27.3811	29.5429	-0.10963	0.5948	0.999568
FBtr0302852	FBgn0051262	-	1988	0	0	0	1	1
TCONS_00977867	XLOC_215104	-	210	0	1.1314	#NAME?	1	1
FBtr0337035	FBgn0051051	-	853	4.3e-06	4.84e-06	-0.172639	1	1
FBtr0334076	FBgn0035265	-	2200	0.309148	0.280915	0.138161	1	1
FBtr0334077	FBgn0035264	-	3878	3.56087	2.86972	0.311316	1	1
FBtr0334074	FBgn0035268	-	2525	20.2788	24.1998	-0.255026	1	1
FBtr0334075	FBgn0022702	-	1911	0.72171	0.953621	-0.401998	0.83695	0.999568
FBtr0334072	FBgn0035267	-	5090	0.31166	0.172639	0.852218	1	1
FBtr0334073	FBgn0035268	-	2540	0.756389	0.37972	0.994192	1	1
FBtr0334070	FBgn0036544	-	6737	0.522853	0.592079	-0.179383	0.7397	0.999568
FBtr0334071	FBgn0036544	-	6755	6.33e-05	0.111689	-10.7852	1	1
FBtr0334078	FBgn0027594	-	3148	1.49761	1.14618	0.385828	0.7794	0.999568
FBtr0334079	FBgn0027594	-	4435	9.60123	12.0176	-0.323859	0.3982	0.999568
FBtr0075669	FBgn0036465	-	940	0.991329	0.211493	2.22875	0.40195	0.999568
FBtr0089861	FBgn0053467	-	561	0.0957313	0.0411795	1.21706	1	1
FBtr0089867	FBgn0035028	-	2360	0.543188	0.598813	-0.140653	0.9406	0.999568
FBtr0089868	FBgn0035028	-	2170	8.69781	8.99799	-0.0489501	0.9091	0.999568
FBtr0089869	FBgn0029854	-	1607	0.811515	0.76026	0.0941265	0.95595	0.999568
FBtr0075663	FBgn0036469	-	489	0.866134	0.693106	0.321514	1	1
FBtr0075665	FBgn0036467	-	544	1.33411	1.34834	-0.0153057	0.98335	0.999568
FBtr0075664	FBgn0036468	-	560	0.712974	0.732258	-0.0385029	0.9644	0.999568
FBtr0075666	FBgn0036466	-	660	0.145373	0.237072	-0.705568	1	1
FBtr0331754	FBgn0052579	-	1317	0.0923571	0.608089	-2.71899	0.4702	0.999568
FBtr0331755	FBgn0052579	-	1009	12.2855	13.1233	-0.0951814	0.8752	0.999568
FBtr0331756	FBgn0030740	-	1726	4.631	4.45654	0.0554005	0.9629	0.999568
FBtr0331757	FBgn0052767	-	6993	2.13686	3.70698	-0.794757	0.2012	0.999568
FBtr0331750	FBgn0052660	-	342	0	0	0	1	1
FBtr0331751	FBgn0003371	-	4750	0.294106	0.187835	0.646867	1	1
FBtr0331752	FBgn0003371	-	4499	0.0290584	0.143254	-2.30154	1	1
FBtr0331753	FBgn0003371	-	5004	0.560263	0.596189	-0.0896641	0.9537	0.999568
FBtr0331758	FBgn0052767	-	11438	0.562534	0.581877	-0.0487727	0.96435	0.999568
FBtr0331759	FBgn0259170	-	3156	4.75324	2.59075	0.875544	0.2154	0.999568
TCONS_00365855	XLOC_062152	-	334	0.0639606	0.0589009	0.118892	1	1
FBtr0346172	FBgn0267096	-	177	0	0	0	1	1
FBtr0346173	FBgn0267097	-	1419	0.142745	0.103446	0.464564	1	1
FBtr0346170	FBgn0052698	-	1775	1.19829	1.1499	0.0594706	0.949	0.999568
FBtr0339392	FBgn0033431	-	1341	18.0931	14.4914	0.320242	0.8744	0.999568
FBtr0346177	FBgn0267101	-	399	0.503232	0.37817	0.412187	1	1
FBtr0346174	FBgn0267098	-	347	0	0	0	1	1
FBtr0346175	FBgn0030078	-	1810	1.22905	0.637483	0.947082	0.38915	0.999568
FBtr0346178	FBgn0267103	-	386	0.63006	0.732597	-0.217531	0.81755	0.999568
FBtr0346179	FBgn0267102	-	527	0	0	0	1	1
FBtr0343522	FBgn0261954	-	7954	3.84591	5.0332	-0.38815	0.65455	0.999568
FBtr0343523	FBgn0000635	-	3475	0	0	0	1	1
FBtr0343520	FBgn0000536	-	4575	0.304949	0	inf	1	1
FBtr0343521	FBgn0027601	-	2780	0	0	0	1	1
FBtr0343526	FBgn0001316	-	5689	0.489252	0.513045	-0.0685056	0.974	0.999568
FBtr0343527	FBgn0001316	-	2708	0.744902	0.562084	0.406265	0.8857	0.999568
FBtr0343524	FBgn0000635	-	3260	0.121242	0.14381	-0.246272	1	1
FBtr0343525	FBgn0027287	-	5007	1.7667	1.47635	0.259021	0.76375	0.999568
FBtr0343528	FBgn0004368	-	6060	1.28629	2.03264	-0.66014	0.36805	0.999568
FBtr0343529	FBgn0004368	-	6059	5.98966	5.8022	0.0458745	0.9078	0.999568
TCONS_00366730	XLOC_065797	-	685	1.35475	1.09249	0.310401	0.9151	0.999568
FBtr0333250	FBgn0031544	-	1832	10.6692	10.9678	-0.0398295	0.93985	0.999568
FBtr0076318	FBgn0036043	-	4515	11.5022	12.0597	-0.0682885	0.8363	0.999568
FBtr0076319	FBgn0036043	-	5759	0.292408	0.0704681	2.05294	1	1
FBtr0330409	FBgn0030761	-	1971	13.9963	13.8556	0.0145817	1	1
FBtr0076310	FBgn0052057	-	3531	0	0	0	1	1
FBtr0076311	FBgn0036072	-	1096	0.0763803	0.12277	-0.684688	1	1
FBtr0330401	FBgn0030613	-	8285	0.543559	0.264794	1.03757	0.1819	0.999568
FBtr0330400	FBgn0030613	-	8459	0.00496131	0.148619	-4.90475	1	1
FBtr0076314	FBgn0052054	-	1775	8.65867	6.1647	0.490114	0.35295	0.999568
FBtr0076315	FBgn0052053	-	1618	3.73853	2.25445	0.729693	0.41915	0.999568
FBtr0076316	FBgn0036066	-	2112	4.97885	3.04337	0.710143	0.2933	0.999568
FBtr0076317	FBgn0036043	-	5319	3.43191	6.40387	-0.899934	0.1237	0.999568
FBtr0344582	FBgn0264482	-	296	0.335654	0.297269	0.175204	1	1
FBtr0088809	FBgn0033271	-	1674	2.53961	1.59329	0.6726	1	1
FBtr0088801	FBgn0033280	-	605	0.0848633	0.0380496	1.15726	1	1
FBtr0088800	FBgn0050376	-	941	0.255225	0.127417	1.00221	1	1
FBtr0088803	FBgn0010109	-	2036	0.0293192	0.0773829	-1.40017	1	1
FBtr0088802	FBgn0033279	-	817	0.108843	0.102211	0.0907083	1	1
FBtr0088805	FBgn0033274	-	739	37.9444	28.9673	0.389464	0.2986	0.999568
FBtr0088804	FBgn0033275	-	819	1.60691	0.176982	3.18261	0.4426	0.999568
FBtr0088807	FBgn0033272	-	1558	23.1071	25.0842	-0.118437	0.5928	0.999568
FBtr0088806	FBgn0050373	-	610	55.4047	51.46	0.106557	1	1
FBtr0073369	FBgn0046793	-	1463	0.206303	0.1748	0.239058	1	1
FBtr0073362	FBgn0035575	-	1958	0.68456	0.467052	0.551592	0.24535	0.999568
FBtr0073363	FBgn0035571	-	1173	4.17064	2.64842	0.655135	0.26505	0.999568
FBtr0073361	FBgn0042131	-	1354	0.58932	0.464716	0.342701	0.5947	0.999568
FBtr0073366	FBgn0035568	-	1142	0.150727	0.133603	0.17399	1	1
FBtr0073367	FBgn0035567	-	1188	0.0874195	0.079056	0.145081	1	1
FBtr0073364	FBgn0035570	-	682	0.288171	0.486769	-0.756314	0.7908	0.999568
FBtr0073365	FBgn0035569	-	641	0.0401725	0.247096	-2.62079	1	1
FBtr0333275	FBgn0051038	-	2015	0.663199	0.549194	0.272125	0.85585	0.999568
FBtr0333274	FBgn0051038	-	2369	0.821169	0.602735	0.446155	0.7241	0.999568
FBtr0333277	FBgn0038256	-	1647	6.00535	5.12603	0.228408	0.77255	0.999568
FBtr0333276	FBgn0266064	-	2473	0.45248	0.779527	-0.784744	0.8039	0.999568
FBtr0333271	FBgn0025525	-	5146	2.75008	1.67383	0.71632	0.0295	0.999568
FBtr0333270	FBgn0004870	-	5337	0.200368	0.190672	0.0715574	1	1
FBtr0333273	FBgn0005564	-	2357	0.0367514	0.127661	-1.79645	1	1
FBtr0333272	FBgn0010417	-	2053	0.162076	0.23518	-0.537093	1	1
FBtr0333279	FBgn0037347	-	1534	0.602359	0.438363	0.458497	0.79335	0.999568
FBtr0333278	FBgn0037347	-	1574	1.45688	1.48546	-0.0280277	0.97705	0.999568
TCONS_00983051	XLOC_223630	-	212	1.78601	0	inf	1	1
FBtr0330331	FBgn0263998	-	4364	0.797588	0.30746	1.37525	0.35625	0.999568
FBtr0273308	FBgn0050263	-	6387	0.0666058	0.0426455	0.643253	1	1
FBtr0273306	FBgn0036180	-	3179	27.4105	27.7816	-0.0194031	0.93015	0.999568
FBtr0273307	FBgn0034022	-	3857	0.123777	0.0607875	1.02589	1	1
FBtr0273304	FBgn0036180	-	2167	1.41815	0.000931334	10.5724	0.20565	0.999568
FBtr0273305	FBgn0036180	-	3276	0.811086	0.886577	-0.128392	0.92135	0.999568
FBtr0273302	FBgn0034023	-	1800	0.140642	0.177475	-0.33559	1	1
FBtr0273303	FBgn0050203	-	2877	0.617534	0.449103	0.459473	0.29675	0.999568
FBtr0273301	FBgn0038676	-	5461	0.179273	0.216528	-0.272392	1	1
TCONS_00097366	XLOC_004055	-	222	0.456593	2.8848	-2.65949	0.5196	0.999568
FBtr0299737	FBgn0259219	-	1043	1.17594	0.0787545	3.90031	0.25905	0.999568
FBtr0299736	FBgn0259219	-	968	2.7529	2.00198	0.459525	0.536	0.999568
FBtr0073098	FBgn0035422	-	656	1.71794	1.85208	-0.108463	0.9356	0.999568
FBtr0333189	FBgn0058198	-	1567	0.781052	0.671488	0.218056	0.70355	0.999568
FBtr0333188	FBgn0039668	-	3704	0.282659	0.127186	1.15213	1	1
FBtr0073094	FBgn0035425	-	1694	15.6133	16.8867	-0.113113	0.76505	0.999568
FBtr0073095	FBgn0035422	-	887	18.4223	16.3431	0.17277	0.86225	0.999568
FBtr0333185	FBgn0026080	-	2368	0.179778	0.11898	0.595501	1	1
FBtr0073097	FBgn0035422	-	547	664.464	574.27	0.210462	0.32935	0.999568
FBtr0073090	FBgn0035431	-	958	0.122943	0.253076	-1.04158	1	1
FBtr0333182	FBgn0000719	-	5256	0.73726	0.584497	0.334978	0.78215	0.999568
FBtr0073092	FBgn0035426	-	954	0.000521374	0.000758536	-0.540898	1	1
FBtr0073093	FBgn0035425	-	1577	42.8967	48.7299	-0.183941	0.41945	0.999568
TCONS_00000233	XLOC_000138	-	503	0	0	0	1	1
TCONS_00939787	XLOC_189716	-	223	0	1.20268	#NAME?	1	1
FBtr0330332	FBgn0263998	-	5956	1.05779	1.04569	0.0166047	0.9829	0.999568
FBtr0072949	FBgn0035358	-	934	10.7787	7.70264	0.484753	0.1125	0.999568
FBtr0072948	FBgn0027082	-	1509	9.46572	8.77157	0.109877	0.76925	0.999568
FBtr0332586	FBgn0023508	-	3619	0.459282	0.643315	-0.486144	0.7583	0.999568
FBtr0332587	FBgn0023522	-	1544	0	0	0	1	1
FBtr0332580	FBgn0023511	-	3883	0.921378	0.908405	0.0204578	0.9914	0.999568
FBtr0332581	FBgn0052803	-	905	0.642859	0.914319	-0.508196	0.78635	0.999568
FBtr0332582	FBgn0052803	-	800	0.289977	0.332294	-0.196521	1	1
FBtr0332583	FBgn0000117	-	3211	0.290374	0.222358	0.385028	1	1
FBtr0072943	FBgn0020509	-	479	0.185052	0.276151	-0.577525	1	1
FBtr0332588	FBgn0023522	-	1765	2.50563	1.70786	0.552982	0.64685	0.999568
FBtr0332589	FBgn0040340	-	1656	9.87154	5.4375	0.860333	0.32065	0.999568
TCONS_00539599	XLOC_105842	-	201	0	1.43928	#NAME?	0.2282	0.999568
FBtr0332638	FBgn0041775	-	2866	15.424	19.7414	-0.356049	0.759	0.999568
FBtr0332639	FBgn0041775	-	2899	9.3138	9.67204	-0.0544504	0.9723	0.999568
FBtr0332636	FBgn0041775	-	2908	203.513	258.241	-0.343597	0.25355	0.999568
FBtr0332637	FBgn0041775	-	4137	56.0757	64.7813	-0.208201	0.6675	0.999568
FBtr0332634	FBgn0036291	-	1027	1.48116	1.79047	-0.273616	0.8389	0.999568
FBtr0332635	FBgn0041775	-	4155	30.0707	29.7577	0.0150931	0.9833	0.999568
FBtr0332632	FBgn0040010	-	5997	1.37265	1.23969	0.146983	0.8638	0.999568
FBtr0332633	FBgn0064225	-	1945	26.0773	20.9892	0.313144	0.8978	0.999568
FBtr0332630	FBgn0040010	-	1663	2.15383	2.48823	-0.208217	0.872	0.999568
FBtr0332631	FBgn0040010	-	1364	109.34	114.498	-0.0664975	1	1
FBtr0308831	FBgn0003714	-	1596	0.621297	0.568191	0.128908	0.9351	0.999568
FBtr0308830	FBgn0030640	-	2306	0.539377	0.766159	-0.50635	0.69785	0.999568
FBtr0308833	FBgn0262518	-	2043	38.174	38.7431	-0.0213483	1	1
FBtr0308832	FBgn0262518	-	1068	0.496067	1.59311	-1.68324	0.5293	0.999568
FBtr0308835	FBgn0263397	-	2485	0.340636	0.346252	-0.0235931	0.9876	0.999568
FBtr0308834	FBgn0263397	-	2524	0.172873	0.358196	-1.05104	0.63645	0.999568
FBtr0308837	FBgn0263397	-	4152	0.245509	0.243841	0.00983512	1	1
FBtr0308836	FBgn0263397	-	2526	5.16903	5.1166	0.01471	0.9631	0.999568
FBtr0308839	FBgn0030809	-	6241	9.90869	13.0472	-0.396978	0.3341	0.999568
FBtr0308838	FBgn0027601	-	2980	0	0	0	1	1
Novel000048.1	Novel000048	-	2641	0.110374	0.0856057	0.366624	1	1
FBtr0345502	FBgn0263030	-	765	0	0.0827289	#NAME?	1	1
FBtr0345503	FBgn0034755	-	692	0.745662	0.581429	0.358919	0.71015	0.999568
FBtr0345501	FBgn0266807	-	481	2.05162	0.980954	1.0645	0.17675	0.999568
FBtr0345506	FBgn0040359	-	2801	8.97e-05	9.06e-05	-0.015133	1	1
FBtr0332884	FBgn0025692	-	1011	3.09761	2.44881	0.339076	0.7006	0.999568
FBtr0345504	FBgn0034753	-	1177	10.3507	9.8649	0.0693549	0.9695	0.999568
TCONS_00458418	XLOC_113593	-	219	1.46074	0	inf	1	1
FBtr0080562	FBgn0019890	-	4809	11.224	10.865	0.0468921	0.8748	0.999568
FBtr0080563	FBgn0028920	-	885	615.938	421.045	0.548811	1	1
FBtr0080560	FBgn0028938	-	2433	0.24293	0.219087	0.149037	1	1
FBtr0080561	FBgn0019890	-	4021	8.61245	8.5182	0.0158757	0.9651	0.999568
FBtr0080566	FBgn0260407	-	707	63.2808	59.3835	0.0917061	0.73955	0.999568
TCONS_01001793	XLOC_223845	-	202	2.2733	1.39891	0.700485	1	1
FBtr0080564	FBgn0053306	-	800	78.7521	61.0837	0.366531	0.7418	0.999568
FBtr0080565	FBgn0053307	-	586	27.0991	19.6034	0.467139	1	1
FBtr0339941	FBgn0034776	-	1519	0.0347307	0.091614	-1.39936	1	1
FBtr0339940	FBgn0000633	-	5879	0.779803	0.526499	0.566678	0.14185	0.999568
FBtr0339943	FBgn0265496	-	2633	0.150036	0.0847028	0.82483	1	1
FBtr0080569	FBgn0001961	-	1666	14.9536	16.4448	-0.137139	0.665	0.999568
FBtr0339945	FBgn0030468	-	1987	0.509815	0.56713	-0.153706	0.94745	0.999568
FBtr0339944	FBgn0265497	-	1591	0.541597	0.713428	-0.397549	0.4081	0.999568
FBtr0339946	FBgn0030467	-	1780	0.465395	0.331514	0.489385	0.8702	0.999568
FBtr0112845	FBgn0004875	-	7623	0	0	0	1	1
FBtr0112844	FBgn0004875	-	7323	0.635777	0.684043	-0.105566	0.93345	0.999568
FBtr0112847	FBgn0004956	-	2443	0.146239	0.09011	0.698572	1	1
FBtr0112846	FBgn0004914	-	3600	5.40517	3.97288	0.444153	0.3716	0.999568
FBtr0112841	FBgn0004174	-	359	0	0.184897	#NAME?	1	1
TCONS_00505067	XLOC_115569	-	493	3.051	1.14692	1.41151	0.0353	0.999568
FBtr0112843	FBgn0004860	-	6020	2.07033	2.45179	-0.243971	0.4852	0.999568
FBtr0346741	FBgn0267412	-	811	0	0	0	1	1
Novel000149.1	Novel000149	-	958	0.338261	0.228974	0.562953	1	1
FBtr0346740	FBgn0267411	-	942	0	0	0	1	1
FBtr0113464	FBgn0053519	-	13189	0.10778	0.0254206	2.08402	1	1
FBtr0113465	FBgn0053542	-	2221	0.276202	0.242139	0.189888	1	1
FBtr0334339	FBgn0039663	-	3479	6.26194	8.41096	-0.42566	0.1404	0.999568
FBtr0113461	FBgn0086610	-	660	0.0385398	0.0340736	0.177695	1	1
FBtr0332422	FBgn0033607	-	2849	3.11843	3.07808	0.0187884	0.97945	0.999568
FBtr0334335	FBgn0262167	-	5610	0.207786	0.393524	-0.921354	0.80195	0.999568
FBtr0334334	FBgn0003134	-	3210	1.36302	1.17284	0.216792	0.8593	0.999568
FBtr0334337	FBgn0039205	-	563	32.6192	23.5621	0.469253	1	1
FBtr0334336	FBgn0266758	-	2963	0.132937	0.265398	-0.997409	1	1
FBtr0334331	FBgn0037635	-	2072	1.11339	1.06103	0.0694897	0.95965	0.999568
FBtr0113469	FBgn0053556	-	6298	0.0601178	0	inf	1	1
FBtr0334333	FBgn0039201	-	2323	0.0718131	0.0591712	0.279353	1	1
FBtr0334332	FBgn0037633	-	2186	1.7392	1.5747	0.143352	0.94725	0.999568
FBtr0332420	FBgn0041174	-	946	16.6918	15.1027	0.144337	1	1
FBtr0332427	FBgn0039089	-	3278	0.454662	0.31486	0.530082	0.37885	0.999568
FBtr0112594	FBgn0085398	-	1800	0.000933592	0.00096877	-0.0533608	1	1
FBtr0112593	FBgn0085397	-	4859	0.803242	0.586173	0.454507	0.23765	0.999568
FBtr0112592	FBgn0085396	-	1703	0.171485	0.199804	-0.220507	1	1
FBtr0089323	FBgn0036362	-	876	38.4526	15.6176	1.2999	5e-05	0.0107714
FBtr0089322	FBgn0036290	-	1180	7.71783	7.49752	0.0417814	0.9459	0.999568
FBtr0089321	FBgn0036290	-	1115	64.1553	61.9431	0.0506248	1	1
FBtr0089320	FBgn0000529	-	2012	0.100865	0.166412	-0.722325	1	1
FBtr0089327	FBgn0005561	-	4693	0.00113807	0	inf	1	1
FBtr0089324	FBgn0002565	-	2304	2.5219	14.4354	-2.51703	1	1
FBtr0089329	FBgn0025885	-	1986	98.0906	85.5623	0.19714	0.2966	0.999568
FBtr0089328	FBgn0005561	-	4102	0	0	0	1	1
FBtr0346909	FBgn0266901	-	3150	0.400031	0.440521	-0.139097	0.78965	0.999568
FBtr0346908	FBgn0263413	-	7596	0.289798	0.285737	0.0203625	1	1
FBtr0088492	FBgn0050001	-	1327	10.8698	11.1335	-0.0345814	0.89785	0.999568
FBtr0088493	FBgn0033446	-	1047	59.4586	38.7862	0.616342	1	1
FBtr0083143	FBgn0000047	-	1595	15.1745	3.63189	2.06285	5e-05	0.0107714
FBtr0083142	FBgn0028984	-	1518	8.0144	7.38578	0.117844	0.89175	0.999568
FBtr0083145	FBgn0038342	-	881	0.300658	0.160769	0.903137	1	1
FBtr0344324	FBgn0259834	-	3414	7.82428	6.7542	0.212173	0.6448	0.999568
FBtr0083147	FBgn0038344	-	6970	10.8906	12.1573	-0.158738	0.4191	0.999568
FBtr0088495	FBgn0027589	-	4116	0.47563	0.400256	0.248915	0.79515	0.999568
FBtr0344329	FBgn0266390	-	1120	0.0755017	0.170295	-1.17345	1	1
FBtr0083148	FBgn0038345	-	1019	0.104055	0.153469	-0.560594	1	1
TCONS_00063287	XLOC_014386	-	234	2.62414	0.993155	1.40175	0.57725	0.999568
FBtr0088499	FBgn0023143	-	4343	135.044	154.76	-0.196602	0.30535	0.999568
FBtr0082230	FBgn0037809	-	1001	15.8807	17.8816	-0.171198	0.50785	0.999568
FBtr0082231	FBgn0037810	-	4775	60.2737	74.4807	-0.305339	0.09835	0.999568
FBtr0082232	FBgn0037810	-	4676	0.108213	0.136765	-0.337833	1	1
FBtr0082233	FBgn0037811	-	2407	2.76266	3.657	-0.404603	0.18045	0.999568
FBtr0082234	FBgn0037812	-	660	0.303925	0.270182	0.169783	1	1
FBtr0082235	FBgn0051406	-	636	0	0	0	1	1
FBtr0082236	FBgn0051406	-	1010	0.0415807	0.0387295	0.102479	1	1
FBtr0082237	FBgn0015396	-	3860	58.5699	70.7061	-0.271674	0.1488	0.999568
FBtr0345058	FBgn0261289	-	686	0.249326	0.128664	0.954427	1	1
FBtr0082239	FBgn0266717	-	15402	13.6455	16.138	-0.24203	0.45005	0.999568
FBtr0310148	FBgn0033372	-	2279	0.942507	1.16042	-0.300071	0.73945	0.999568
FBtr0310149	FBgn0032387	-	2300	9.08864	7.5921	0.259565	0.63105	0.999568
FBtr0310140	FBgn0033996	-	1993	2.72286	1.02995	1.40255	0.3205	0.999568
FBtr0310141	FBgn0033502	-	1705	2.86316	2.20373	0.377659	0.61255	0.999568
FBtr0310142	FBgn0033502	-	2487	0.644538	0.571239	0.174171	0.88935	0.999568
FBtr0310143	FBgn0033373	-	1708	5.03312	5.56918	-0.14601	0.88905	0.999568
FBtr0310144	FBgn0033373	-	1793	1.96371	1.46079	0.426833	0.82305	0.999568
FBtr0310145	FBgn0033373	-	1749	1.02137	0.544221	0.908246	0.78505	0.999568
FBtr0310146	FBgn0033373	-	1402	3.67148	4.03308	-0.135521	0.92905	0.999568
FBtr0310147	FBgn0033372	-	2351	7.87573	8.03612	-0.0290847	0.9217	0.999568
FBtr0084690	FBgn0004885	-	5368	6.53513	5.60932	0.220391	0.4575	0.999568
FBtr0084691	FBgn0003719	-	3359	0.495412	0.455526	0.121095	0.7791	0.999568
FBtr0084692	FBgn0000140	-	6338	40.0793	50.681	-0.338586	0.0693	0.999568
FBtr0084693	FBgn0040600	-	761	8.98484	6.56168	0.453426	1	1
FBtr0084697	FBgn0039225	-	3003	0.129924	0.0793383	0.711582	1	1
FBtr0084698	FBgn0039228	-	927	0.520177	0.365674	0.508444	0.8554	0.999568
FBtr0088146	FBgn0082585	-	2795	3.1287	2.58263	0.276722	0.57695	0.999568
FBtr0088140	FBgn0000581	-	9325	6.95897	8.88062	-0.351787	0.2791	0.999568
FBtr0088141	FBgn0015872	-	1745	18.8939	8.66582	1.12451	0.0003	0.0456606
FBtr0088142	FBgn0015872	-	1444	0.949684	1.06705	-0.168105	0.897	0.999568
TCONS_01022786	XLOC_196643	-	222	0.485287	0.429929	0.174742	0.47475	0.999568
FBtr0100109	FBgn0054054	-	545	4.71535	3.67484	0.359683	0.4067	0.999568
FBtr0100106	FBgn0054051	-	771	0.0323156	0.151139	-2.22557	1	1
Novel000135.1	Novel000135	-	567	0.2054	0.0837798	1.29376	1	1
FBtr0342587	FBgn0265794	-	316	0.273846	0.511476	-0.9013	1	1
FBtr0342586	FBgn0265793	-	671	0.261431	0.363857	-0.476942	1	1
FBtr0342585	FBgn0265792	-	1049	0.327037	0.259227	0.335236	1	1
FBtr0342584	FBgn0051870	-	537	0.295137	0.0706628	2.06236	1	1
FBtr0342583	FBgn0051870	-	1097	0.122062	0.11204	0.1236	1	1
FBtr0342582	FBgn0265791	-	533	0.0498839	0.0928335	-0.896071	1	1
FBtr0342581	FBgn0032391	-	1532	23.0725	24.7921	-0.103702	1	1
FBtr0342580	FBgn0032390	-	987	8.29687	12.5561	-0.597743	0.33915	0.999568
FBtr0342589	FBgn0265796	-	370	0.0955659	0.089738	0.0907774	1	1
FBtr0342588	FBgn0265797	-	329	0.124049	0.341137	-1.45944	1	1
FBtr0087347	FBgn0023441	-	4375	1.1466	0.442698	1.37297	0.32645	0.999568
FBtr0087346	FBgn0023441	-	5512	5.12206	6.41145	-0.323926	0.36405	0.999568
FBtr0087345	FBgn0023441	-	3671	0.0284176	0.000386745	6.19926	1	1
FBtr0087344	FBgn0023441	-	5256	2.32127	2.94649	-0.344079	0.4951	0.999568
FBtr0306338	FBgn0264857	-	1733	7.92e-06	0	inf	1	1
FBtr0306339	FBgn0264857	-	1825	0	0.0534045	#NAME?	1	1
FBtr0087341	FBgn0262512	-	659	236.367	207.211	0.18993	0.32435	0.999568
FBtr0345582	FBgn0034288	-	1182	0.126416	0.0790308	0.677698	1	1
FBtr0306335	FBgn0085423	-	4936	0.0454192	0	inf	1	1
FBtr0306336	FBgn0031968	-	1264	4.66486	5.21708	-0.161409	0.82455	0.999568
FBtr0306337	FBgn0000014	-	5269	0.148232	0.202002	-0.446514	1	1
FBtr0306330	FBgn0004919	-	3725	0.000149036	0.0864716	-9.18042	1	1
FBtr0306331	FBgn0052296	-	7755	2.84618	3.11141	-0.128538	0.65385	0.999568
FBtr0087349	FBgn0034033	-	735	1.22376	0.971114	0.333602	0.90225	0.999568
FBtr0306333	FBgn0085423	-	6208	1.55343	1.59193	-0.0353191	0.959	0.999568
FBtr0085279	FBgn0039576	-	503	0	0	0	1	1
FBtr0085278	FBgn0004171	-	1066	0.0389161	0.0547046	-0.491295	1	1
FBtr0085271	FBgn0053213	-	1279	21.4073	22.9244	-0.098777	0.78735	0.999568
FBtr0085270	FBgn0039557	-	1246	19.7932	21.1983	-0.0989486	0.6745	0.999568
FBtr0085272	FBgn0039554	-	2491	27.422	32.7986	-0.2583	0.1927	0.999568
FBtr0085277	FBgn0002865	-	1319	0.0950575	0.0848353	0.164136	1	1
FBtr0309316	FBgn0039942	-	1451	27.7941	28.967	-0.0596305	0.8633	0.999568
TCONS_00707053	XLOC_134471	-	346	0.331267	0.306427	0.11245	1	1
FBtr0309312	FBgn0264712	-	2443	1.10038	1.00858	0.12568	1	1
FBtr0344268	FBgn0037448	-	3672	0	0	0	1	1
FBtr0309319	FBgn0003261	-	4362	1.85809	2.0951	-0.173198	0.9171	0.999568
FBtr0309318	FBgn0037395	-	1089	0.000968037	0.000983061	-0.0222184	1	1
FBtr0344269	FBgn0037448	-	4904	0.171753	0.0960105	0.839069	1	1
TCONS_00554193	XLOC_093566	-	994	0.837922	0.670589	0.321386	0.80625	0.999568
FBtr0344468	FBgn0265313	-	1676	7.66493	5.50287	0.478087	0.39855	0.999568
FBtr0329908	FBgn0003130	-	2458	0.0975563	0.10502	-0.106359	1	1
FBtr0329909	FBgn0265991	-	1963	4.17114	2.83608	0.556546	0.5899	0.999568
FBtr0329900	FBgn0015558	-	3078	0.508996	0.859426	-0.755718	0.42945	0.999568
FBtr0329901	FBgn0015558	-	7199	0.995938	0.942348	0.0797955	0.8511	0.999568
FBtr0329902	FBgn0015558	-	3853	0.290772	7.63e-05	11.8963	1	1
FBtr0329903	FBgn0015558	-	6642	0	0.0167331	#NAME?	1	1
FBtr0329904	FBgn0263971	-	450	0.0699711	0.185607	-1.40742	1	1
FBtr0329905	FBgn0031505	-	762	9.28103	7.69685	0.270016	0.7402	0.999568
FBtr0329906	FBgn0015600	-	4265	4.05367	2.82483	0.521064	0.3547	0.999568
FBtr0306802	FBgn0033097	-	1278	0.84431	0.393108	1.10285	0.0449	0.999568
FBtr0306800	FBgn0036717	-	2980	0.15075	0.113737	0.406458	1	1
FBtr0306801	FBgn0030791	-	1792	0	0	0	1	1
FBtr0306806	FBgn0037565	-	5535	1.05006	0.439131	1.25774	0.0745	0.999568
FBtr0306807	FBgn0017558	-	2732	19.7705	16.8992	0.226394	0.3733	0.999568
FBtr0306804	FBgn0051464	-	741	0.319139	0.60673	-0.926868	0.20655	0.999568
FBtr0306805	FBgn0037565	-	5550	1.146	0.581272	0.97932	0.3939	0.999568
FBtr0071145	FBgn0000427	-	5696	16.1845	28.8293	-0.832924	0.2752	0.999568
FBtr0071146	FBgn0000427	-	3737	38.1803	35.2207	0.116404	0.86415	0.999568
FBtr0071147	FBgn0000427	-	3751	302.33	290.15	0.0593265	0.79975	0.999568
FBtr0071140	FBgn0029971	-	487	260.162	229.144	0.183154	0.3948	0.999568
FBtr0071141	FBgn0029971	-	509	5.474	5.19019	0.0768088	0.95905	0.999568
FBtr0071142	FBgn0029970	-	2581	30.3356	36.9877	-0.286034	0.142	0.999568
FBtr0071143	FBgn0029969	-	1517	131.604	134.204	-0.0282266	1	1
FBtr0079791	FBgn0032077	-	864	19.1289	17.9533	0.0915055	1	1
FBtr0079790	FBgn0032078	-	1931	6.33897	12.2974	-0.956027	0.0492	0.999568
FBtr0346772	FBgn0267433	-	13680	0	0	0	1	1
FBtr0346773	FBgn0267489	-	3744	0	0	0	1	1
FBtr0079795	FBgn0267252	-	2799	0.578914	0.654366	-0.17675	0.91245	0.999568
FBtr0079797	FBgn0267252	-	12225	0.206191	0.233095	-0.17694	1	1
FBtr0079796	FBgn0267252	-	1019	25.4129	21.5355	0.238844	1	1
FBtr0079799	FBgn0010314	-	1147	38.7072	44.5938	-0.204242	0.33725	0.999568
FBtr0343720	FBgn0266160	-	324	3.27401	2.38289	0.458346	0.8277	0.999568
FBtr0343721	FBgn0001987	-	4468	1.14835	1.57106	-0.452176	0.5059	0.999568
FBtr0343722	FBgn0001989	-	992	2.17223	2.53496	-0.222789	0.8574	0.999568
FBtr0343723	FBgn0266161	-	372	0.0945054	0.702439	-2.8939	1	1
FBtr0343724	FBgn0266162	-	552	0.336488	0.265189	0.343537	1	1
FBtr0343725	FBgn0028858	-	1023	0.0387683	0.18516	-2.25582	1	1
FBtr0343726	FBgn0028644	-	4924	0.230644	2.83e-05	12.9946	1	1
FBtr0343727	FBgn0028644	-	4695	0.205824	0.293544	-0.512169	1	1
FBtr0343728	FBgn0013433	-	2870	0.0708809	9.62e-05	9.52579	1	1
FBtr0343729	FBgn0266165	-	840	0.134388	0.0977659	0.459006	1	1
FBtr0344340	FBgn0039531	-	1375	4.02422	3.91385	0.0401218	0.95875	0.999568
FBtr0344347	FBgn0038532	-	5857	0.356409	0.543698	-0.609274	0.64275	0.999568
FBtr0345105	FBgn0266696	-	5863	1.28522	0.467008	1.46049	0.42475	0.999568
FBtr0336949	FBgn0016930	-	2826	0.0723353	0.237798	-1.71697	1	1
FBtr0077420	FBgn0031623	-	591	5.50314	4.67892	0.234079	0.6491	0.999568
FBtr0077423	FBgn0000227	-	1352	0.0897171	0.535418	-2.57721	0.06715	0.999568
FBtr0077422	FBgn0031622	-	1685	0.0683399	0.127231	-0.896648	1	1
FBtr0077425	FBgn0028482	-	2730	6.44437	4.60675	0.484289	0.0633	0.999568
FBtr0077427	FBgn0020762	-	3846	1.50801	1.60459	-0.0895579	0.88995	0.999568
FBtr0077426	FBgn0020762	-	4181	7.0618	5.77239	0.290867	1	1
FBtr0077429	FBgn0026319	-	2361	2.57836	1.66149	0.633977	0.0654	0.999568
FBtr0077428	FBgn0031596	-	943	0.0809842	0.0637993	0.3441	1	1
TCONS_00065582	XLOC_018917	-	201	1.52945	0.67714	1.17549	1	1
FBtr0345103	FBgn0266696	-	6398	2.34044	2.13568	0.132085	0.8845	0.999568
FBtr0343898	FBgn0266234	-	443	0.0677782	0	inf	1	1
FBtr0343899	FBgn0266234	-	693	0.0359986	0.0318266	0.177706	1	1
FBtr0343892	FBgn0266229	-	1275	0.224541	0.204969	0.131577	1	1
FBtr0343893	FBgn0266230	-	606	0.128231	0.115006	0.157034	1	1
FBtr0343890	FBgn0266227	-	2517	1.4854	1.5685	-0.0785333	0.84365	0.999568
FBtr0343891	FBgn0266228	-	811	0.799103	0.897013	-0.166748	0.7618	0.999568
FBtr0343896	FBgn0266233	-	766	0.122093	0.138135	-0.178101	1	1
FBtr0343897	FBgn0266226	-	501	0.113456	0.103279	0.135594	1	1
FBtr0343894	FBgn0266231	-	616	0.210292	0.225138	-0.0984108	1	1
FBtr0343895	FBgn0266232	-	1115	0.0943357	0.137097	-0.53932	1	1
FBtr0344048	FBgn0266318	-	532	0.0530712	0.0461831	0.200566	1	1
FBtr0344041	FBgn0266312	-	1351	0.696923	0.573645	0.28084	0.8673	0.999568
FBtr0344042	FBgn0266313	-	814	0.84976	0.619507	0.455936	0.865	0.999568
FBtr0344043	FBgn0266313	-	971	0.107995	0.0748675	0.528555	1	1
FBtr0344044	FBgn0266314	-	272	0.222264	0.196747	0.175931	1	1
FBtr0344045	FBgn0266315	-	951	0.556616	0.249907	1.15529	0.33455	0.999568
TCONS_00790782	XLOC_150930	-	204	0	0	0	1	1
TCONS_00439055	XLOC_126816	-	937	0.467536	0.3827	0.288864	0.8578	0.999568
FBtr0301124	FBgn0026083	-	8145	2.08709	1.68513	0.308628	0.8149	0.999568
FBtr0301125	FBgn0031920	-	1730	0.497308	0.508609	-0.0324158	0.98605	0.999568
FBtr0301126	FBgn0024814	-	1230	3.81012	4.3281	-0.183897	0.90725	0.999568
FBtr0301127	FBgn0033687	-	728	0.282819	0	inf	1	1
FBtr0301121	FBgn0267861	-	1102	1.08246	0.84746	0.353099	0.89015	0.999568
FBtr0344348	FBgn0266405	-	249	23.2486	2.62706	3.14562	0.33425	0.999568
FBtr0301128	FBgn0031976	-	1493	0	0	0	1	1
FBtr0301129	FBgn0031976	-	1265	0.0336065	0	inf	1	1
FBtr0337104	FBgn0020379	-	3861	0.100196	0.177478	-0.824814	1	1
FBtr0336665	FBgn0033081	-	939	145.921	163.749	-0.1663	1	1
FBtr0331991	FBgn0014417	-	2642	103.244	117.961	-0.192262	0.33225	0.999568
FBtr0331204	FBgn0031251	-	4292	0.000459726	0.553736	-10.2342	1	1
FBtr0081011	FBgn0032634	-	516	90.7523	94.8599	-0.0638647	0.90265	0.999568
FBtr0081010	FBgn0051803	-	929	0.0964722	0.408753	-2.08305	1	1
FBtr0081013	FBgn0015609	-	10412	0.200153	0.149377	0.422145	1	1
FBtr0081015	FBgn0015609	-	13384	0.660307	0.523277	0.335564	0.4794	0.999568
FBtr0081014	FBgn0015609	-	10409	0.144503	0.214585	-0.570451	1	1
FBtr0081017	FBgn0015609	-	10412	0.0919158	0.278341	-1.59847	1	1
FBtr0081016	FBgn0015609	-	13228	4.42e-05	0.120774	-11.4159	1	1
FBtr0081019	FBgn0015609	-	10409	0.227853	0.0797669	1.51424	1	1
FBtr0081018	FBgn0015609	-	10412	0.0578334	0.146481	-1.34074	1	1
FBtr0071968	FBgn0034827	-	2499	0.0897719	0.117171	-0.384284	1	1
FBtr0071969	FBgn0034829	-	2988	0.125266	0.107655	0.218581	1	1
FBtr0071966	FBgn0034820	-	989	0.0891988	0.099743	-0.161192	1	1
FBtr0071967	FBgn0050192	-	373	0	0	0	1	1
FBtr0071964	FBgn0045483	-	1104	0.171182	0.244016	-0.511446	1	1
FBtr0071965	FBgn0045482	-	1101	0.0957891	0.0868202	0.141831	1	1
FBtr0071963	FBgn0034816	-	1670	5.50223	7.56166	-0.458687	1	1
FBtr0071960	FBgn0021979	-	1944	3.05665	3.4346	-0.168191	0.85495	0.999568
FBtr0071961	FBgn0021979	-	1451	0.489572	0.572044	-0.224603	0.9351	0.999568
FBtr0074301	FBgn0030752	-	1261	8.27307	9.10869	-0.13882	0.9013	0.999568
FBtr0074300	FBgn0261609	-	1200	157.188	144.365	0.122775	1	1
FBtr0074303	FBgn0030749	-	1731	0	0	0	1	1
FBtr0074302	FBgn0030749	-	1233	3.26551	3.37771	-0.048736	1	1
FBtr0074305	FBgn0010416	-	2297	4.96349	5.65302	-0.187667	0.7161	0.999568
FBtr0074304	FBgn0030746	-	3518	0.2031	0.33495	-0.721759	1	1
FBtr0074307	FBgn0030744	-	1594	27.8567	26.5548	0.0690514	0.8121	0.999568
FBtr0074306	FBgn0030744	-	1406	3.56437	5.43429	-0.608443	0.4684	0.999568
FBtr0074309	FBgn0030744	-	1380	0	0	0	1	1
FBtr0074308	FBgn0030744	-	1608	26.6167	26.6673	-0.00274057	0.9926	0.999568
FBtr0332037	FBgn0031739	-	1297	0.544536	0.1957	1.47639	0.52775	0.999568
FBtr0332030	FBgn0069354	-	1069	0	0.184508	#NAME?	1	1
FBtr0332031	FBgn0264352	-	1157	0.110445	0.114051	-0.0463428	1	1
FBtr0332032	FBgn0264352	-	1182	0.000562977	0.000555009	0.0205651	1	1
FBtr0332033	FBgn0032913	-	1353	88.4346	71.2589	0.311541	1	1
FBtr0330065	FBgn0035715	-	1189	8.7637	10.0071	-0.191407	0.77485	0.999568
FBtr0334543	FBgn0267698	-	4937	0	0	0	1	1
TCONS_00126476	XLOC_031429	-	201	0	1.43928	#NAME?	1	1
TCONS_00692072	XLOC_162210	-	202	2.2733	0.65857	1.78738	1	1
TCONS_00692075	XLOC_162218	-	221	0.961334	2.52753	-1.39462	0.52365	0.999568
FBtr0345339	FBgn0011260	-	3440	0.001247	0.00127487	-0.0318815	1	1
FBtr0334544	FBgn0267698	-	4827	0.515373	0.355529	0.535653	0.75855	0.999568
TCONS_01001433	XLOC_222862	-	204	2.10911	0.62376	1.75757	1	1
FBtr0334545	FBgn0261641	-	3589	8.42163	10.0603	-0.256507	1	1
FBtr0080440	FBgn0032482	-	2153	2.52782	1.97191	0.358294	0.812	0.999568
FBtr0334548	FBgn0002413	-	4156	24.4608	28.7802	-0.234609	0.4727	0.999568
FBtr0334549	FBgn0039844	-	2894	0.204706	0.210545	-0.0405751	1	1
TCONS_00038104	XLOC_013338	-	203	0.722707	0	inf	1	1
FBtr0087493	FBgn0261823	-	6643	10.6569	12.0905	-0.18208	0.4148	0.999568
Novel000095.1	Novel000095	-	1697	1.38133	1.3591	0.0234058	0.98265	0.999568
FBtr0080760	FBgn0001986	-	3585	26.2451	27.2369	-0.0535101	0.7795	0.999568
FBtr0080761	FBgn0028507	-	1582	28.7613	28.8493	-0.00440809	0.98795	0.999568
FBtr0080763	FBgn0041627	-	2304	24.0555	25.5661	-0.0878646	0.66985	0.999568
FBtr0080764	FBgn0001990	-	1691	24.6906	25.465	-0.0445519	1	1
FBtr0080765	FBgn0001987	-	4095	8.1319	6.39502	0.346643	0.3029	0.999568
FBtr0080767	FBgn0001987	-	4186	0	0	0	1	1
FBtr0080768	FBgn0001987	-	3975	6.73969	5.85459	0.203116	0.57555	0.999568
FBtr0080769	FBgn0001987	-	4007	0.278804	0.207857	0.42366	1	1
Novel000077.1	Novel000077	-	201	0.764727	0.67714	0.175491	1	1
FBtr0345334	FBgn0031684	-	630	1.85961	1.11797	0.734117	0.81035	0.999568
FBtr0335268	FBgn0264958	-	199	0.747281	0.716842	0.0599961	0.73015	0.999568
FBtr0335269	FBgn0022288	-	1811	19.4454	17.9862	0.112539	0.77435	0.999568
FBtr0335264	FBgn0264956	-	1602	0.136997	0.180423	-0.397245	1	1
FBtr0335265	FBgn0264957	-	849	0.0258861	0.0724767	-1.48534	1	1
FBtr0335266	FBgn0033047	-	2266	5.24379	3.82672	0.454502	0.23795	0.999568
FBtr0335267	FBgn0264958	-	318	3.1757	4.49206	-0.500302	0.394	0.999568
FBtr0335260	FBgn0033020	-	672	0.00686348	2.2e-05	8.28641	1	1
FBtr0335261	FBgn0261429	-	2652	0.305694	0.23097	0.404381	1	1
FBtr0335262	FBgn0259247	-	3645	0.19736	0.060123	1.71485	1	1
FBtr0335263	FBgn0050438	-	2226	0.570871	0.698767	-0.291648	0.80595	0.999568
FBtr0334132	FBgn0264748	-	1240	2.50409	1.91885	0.384051	0.32865	0.999568
FBtr0334131	FBgn0264747	-	1406	1.66808	1.49533	0.157717	0.92275	0.999568
FBtr0334130	FBgn0264747	-	1247	91.6335	96.496	-0.0745942	1	1
FBtr0334137	FBgn0264815	-	4561	0.243889	0.292995	-0.26465	1	1
FBtr0334136	FBgn0264815	-	3862	2.79555	1.73423	0.688842	0.5787	0.999568
FBtr0334135	FBgn0264815	-	4703	0.470694	0.174631	1.43048	0.6878	0.999568
FBtr0334134	FBgn0264744	-	1273	13.5055	13.9773	-0.0495432	0.8466	0.999568
FBtr0334139	FBgn0264815	-	4203	0	0	0	1	1
FBtr0334138	FBgn0264815	-	5563	0	0	0	1	1
FBtr0074875	FBgn0261283	-	3818	41.3808	36.1946	0.193188	0.4191	0.999568
FBtr0074874	FBgn0261283	-	3951	1.1119	0.746378	0.575043	0.74575	0.999568
FBtr0074873	FBgn0261283	-	3841	9.83352	15.2438	-0.632439	0.1336	0.999568
FBtr0074872	FBgn0036932	-	759	16.8065	17.0231	-0.0184793	0.96255	0.999568
FBtr0074871	FBgn0036934	-	3243	0.628349	0.505282	0.314477	0.54975	0.999568
FBtr0074870	FBgn0036935	-	3522	3.99799	3.0663	0.382776	0.1551	0.999568
FBtr0074879	FBgn0036909	-	1642	21.0345	21.1091	-0.00510886	0.98645	0.999568
FBtr0070374	FBgn0029589	-	720	0	0.119158	#NAME?	1	1
FBtr0070375	FBgn0025624	-	1240	19.2708	17.3149	0.154402	0.72935	0.999568
FBtr0070376	FBgn0040395	-	2970	16.8946	18.7157	-0.147689	1	1
FBtr0070377	FBgn0040395	-	2860	9.79603	8.41772	0.218768	0.5789	0.999568
FBtr0070370	FBgn0023515	-	3385	6.10671	7.47952	-0.292551	1	1
FBtr0070371	FBgn0028969	-	2170	19.3986	21.1666	-0.12584	0.7077	0.999568
FBtr0070372	FBgn0026090	-	720	23.3523	20.9354	0.15762	1	1
Novel000136.1	Novel000136	-	1267	0.704888	0.647228	0.12312	0.8029	0.999568
FBtr0070378	FBgn0000382	-	4560	15.6528	18.6606	-0.253576	0.2479	0.999568
FBtr0070379	FBgn0000382	-	7664	1.34439	1.37214	-0.0294705	0.9634	0.999568
TCONS_00912278	XLOC_186132	-	345	0.472195	0	inf	1	1
FBtr0330304	FBgn0264324	-	7513	0	0	0	1	1
FBtr0330305	FBgn0264324	-	6710	0	0	0	1	1
FBtr0330306	FBgn0265274	-	2136	18.9352	15.8164	0.259646	0.4876	0.999568
FBtr0330300	FBgn0039633	-	11681	0.113481	0.199857	-0.816518	1	1
FBtr0330301	FBgn0039633	-	11931	0.000315582	0.00100521	-1.6714	1	1
FBtr0330302	FBgn0053203	-	3243	0.595211	0.800619	-0.427713	0.7183	0.999568
FBtr0330303	FBgn0264324	-	6722	1.03417	1.49681	-0.53342	0.50955	0.999568
FBtr0330308	FBgn0039214	-	13232	0.172675	0.315705	-0.870515	1	1
FBtr0330309	FBgn0039214	-	13284	0.000845146	0.00127157	-0.589344	1	1
TCONS_00648749	XLOC_148628	-	220	0	0	0	1	1
FBtr0346378	FBgn0031070	-	3461	0	0	0	1	1
TCONS_00473649	XLOC_096535	-	213	2.31271	1.02559	1.17312	0.519	0.999568
FBtr0343103	FBgn0265992	-	745	0.255318	0.371697	-0.54183	1	1
FBtr0076439	FBgn0035977	-	1355	3.43139	2.23425	0.619	0.8112	0.999568
FBtr0071429	FBgn0030163	-	1179	4.04189	2.52682	0.67771	0.1209	0.999568
FBtr0071423	FBgn0030174	-	3511	0.49892	0.00049963	9.96373	0.20605	0.999568
FBtr0076430	FBgn0035971	-	983	0.13546	0.0599519	1.17598	1	1
FBtr0076433	FBgn0035975	-	1593	2.12751	0.781926	1.44407	0.0794	0.999568
FBtr0076432	FBgn0035975	-	1606	1.73864	1.97442	-0.183474	0.74505	0.999568
FBtr0076435	FBgn0035975	-	1698	0	0	0	1	1
FBtr0076434	FBgn0035975	-	1286	1.97036	1.56623	0.331159	0.6321	0.999568
FBtr0071424	FBgn0005391	-	1553	4336.71	4429.24	-0.0304591	0.921	0.999568
FBtr0077748	FBgn0041337	-	1844	1.22871	2.38129	-0.954598	0.0162	0.731252
FBtr0077740	FBgn0031451	-	1440	0.17725	0	inf	1	1
FBtr0331324	FBgn0032791	-	1357	2.53502	2.3677	0.0985084	0.94845	0.999568
FBtr0077743	FBgn0031441	-	1144	0.126117	0.166404	-0.399929	1	1
FBtr0077744	FBgn0026479	-	2711	50.0165	54.0804	-0.112703	1	1
FBtr0077745	FBgn0031436	-	621	36.58	32.9527	0.150659	1	1
FBtr0077746	FBgn0031434	-	1654	16.9951	22.0408	-0.375061	0.16715	0.999568
FBtr0077747	FBgn0026778	-	1484	16.8005	18.6649	-0.151821	0.51195	0.999568
FBtr0310388	FBgn0263743	-	676	0.17783	0.129941	0.452642	1	1
FBtr0310389	FBgn0263742	-	907	0.123221	0.200076	-0.699306	1	1
FBtr0310386	FBgn0263740	-	1922	228.28	223.545	0.0302402	1	1
FBtr0310387	FBgn0263740	-	1886	0.0848142	0.0728915	0.218555	1	1
FBtr0310384	FBgn0263738	-	2158	3.65126	4.25877	-0.222042	0.6598	0.999568
FBtr0310385	FBgn0263755	-	2386	23.5532	25.0777	-0.0904827	0.8724	0.999568
FBtr0310382	FBgn0263738	-	2340	0.282795	0.585597	-1.05015	0.52725	0.999568
FBtr0310383	FBgn0263738	-	2385	0.161614	0.140424	0.202768	1	1
FBtr0310380	FBgn0263738	-	2400	0.161519	0.105424	0.615497	1	1
FBtr0310381	FBgn0263738	-	2445	0.0671753	0.0387393	0.794134	1	1
FBtr0088308	FBgn0261862	-	2901	52.281	50.0081	0.064126	0.81435	0.999568
FBtr0331327	FBgn0032793	-	1349	0.657002	0.184922	1.82898	0.6358	0.999568
FBtr0088306	FBgn0033528	-	864	53.5053	55.5679	-0.0545679	0.7973	0.999568
FBtr0088307	FBgn0261862	-	2882	24.6098	32.6777	-0.409074	0.27975	0.999568
FBtr0333671	FBgn0039897	-	2893	0.711951	0.426943	0.737733	0.604	0.999568
FBtr0333670	FBgn0016126	-	2604	26.41	22.5457	0.228235	0.599	0.999568
FBtr0333673	FBgn0264607	-	3735	1.76413	1.2637	0.481297	0.6779	0.999568
TCONS_00044283	XLOC_022002	-	224	0	1.23874	#NAME?	1	1
FBtr0333674	FBgn0264607	-	3855	0.896261	0.511078	0.810375	0.64335	0.999568
TCONS_00879946	XLOC_144119	-	575	0.454889	0.164073	1.47117	0.67055	0.999568
TCONS_00034298	XLOC_007184	-	210	1.20194	0	inf	1	1
FBtr0308206	FBgn0020621	-	4431	0.000358215	0	inf	1	1
FBtr0308207	FBgn0029518	-	835	0.222578	0.250217	-0.168868	1	1
FBtr0308204	FBgn0036958	-	2953	1.00635	0.757903	0.409045	0.85645	0.999568
FBtr0308205	FBgn0050343	-	1064	2.67661	2.86982	-0.100555	0.9648	0.999568
FBtr0308202	FBgn0035533	-	3359	0.00826424	0.262042	-4.98677	1	1
FBtr0308200	FBgn0003380	-	4138	0.165227	0.0664723	1.31362	1	1
FBtr0308201	FBgn0035533	-	3422	0.827713	0.127859	2.69458	0.2645	0.999568
FBtr0308208	FBgn0005427	-	3589	7.75686	7.60943	0.0276848	0.9926	0.999568
FBtr0308209	FBgn0005427	-	4051	0	0	0	1	1
TCONS_00170779	XLOC_013744	-	631	1.84105	1.5149	0.281307	0.90345	0.999568
FBtr0075912	FBgn0014343	-	3019	0.153923	0.0776736	0.986717	1	1
FBtr0332808	FBgn0037710	-	1589	0.403539	0.435249	-0.109134	0.96145	0.999568
FBtr0330717	FBgn0250906	-	1867	0.00469254	4.51848	-9.91125	0.0942	0.999568
TCONS_00939597	XLOC_189396	-	207	0	1.22211	#NAME?	0.1908	0.999568
FBtr0085078	FBgn0039470	-	2127	28.7436	19.5373	0.557008	0.2492	0.999568
FBtr0085077	FBgn0039471	-	1091	131.143	66.9108	0.970827	0.0059	0.397991
FBtr0085075	FBgn0039469	-	1396	0.157905	0.197307	-0.321381	1	1
FBtr0085074	FBgn0039467	-	1981	0.0988574	0.54211	-2.45517	0.44025	0.999568
FBtr0085073	FBgn0039467	-	2361	0.456043	0.212318	1.10294	0.7036	0.999568
FBtr0085072	FBgn0039467	-	2136	0.443421	0.28274	0.649202	0.8176	0.999568
FBtr0085071	FBgn0039467	-	2167	0	0.000648351	#NAME?	1	1
FBtr0085070	FBgn0039467	-	1886	2.61806	1.16891	1.16334	0.3115	0.999568
FBtr0309250	FBgn0030087	-	4972	14.8795	18.6527	-0.326057	0.2042	0.999568
FBtr0073119	FBgn0026189	-	3828	6.54438	7.42172	-0.181498	0.6342	0.999568
FBtr0073118	FBgn0026189	-	4763	10.0547	10.7966	-0.102709	0.7241	0.999568
FBtr0073111	FBgn0035409	-	932	13.5688	10.3954	0.38435	0.53155	0.999568
FBtr0073113	FBgn0266582	-	976	156.508	131.767	0.24824	0.1953	0.999568
FBtr0073112	FBgn0035407	-	1303	11.7588	13.7826	-0.229099	1	1
FBtr0073115	FBgn0035400	-	2510	18.166	19.9849	-0.137675	0.59285	0.999568
FBtr0073114	FBgn0035402	-	2779	57.1984	47.8336	0.25795	0.2562	0.999568
FBtr0073117	FBgn0035400	-	2973	0	0	0	1	1
FBtr0073116	FBgn0035400	-	3839	2.93631	2.64681	0.149748	0.787	0.999568
FBtr0333024	FBgn0036393	-	565	0.139575	0	inf	1	1
FBtr0333025	FBgn0036397	-	2226	0.00472889	1.31758	-8.12217	1	1
FBtr0333026	FBgn0036391	-	3713	0.459977	0.338021	0.444449	0.51385	0.999568
FBtr0333027	FBgn0036391	-	3909	0.110556	0.0844209	0.389102	1	1
FBtr0333020	FBgn0029167	-	11753	3.717	1.59698	1.21879	0.0015	0.151065
FBtr0333021	FBgn0264006	-	9829	0.0968514	0.00402027	4.59041	1	1
FBtr0333022	FBgn0036421	-	783	3.5e-05	3.55e-05	-0.0195137	1	1
FBtr0333023	FBgn0010105	-	2495	0.301103	0.330639	-0.134999	1	1
FBtr0333028	FBgn0036391	-	4421	0.600274	0.702725	-0.227338	0.6567	0.999568
FBtr0333029	FBgn0036391	-	3762	0.377825	0.035014	3.43171	0.1975	0.999568
FBtr0329886	FBgn0263970	-	953	0.0446957	0.208144	-2.21937	1	1
Novel000198.1	Novel000198	-	2816	0.471839	0.423045	0.157483	0.9473	0.999568
FBtr0339079	FBgn0265194	-	7419	4.07403	3.60776	0.175354	0.6316	0.999568
TCONS_00046460	XLOC_025345	-	216	0.552409	2.81634	-2.35001	0.28115	0.999568
FBtr0074468	FBgn0030873	-	1664	28.9296	28.4292	0.0251733	0.9427	0.999568
FBtr0074469	FBgn0030873	-	1884	19.0248	20.4272	-0.102611	0.7951	0.999568
FBtr0332779	FBgn0264468	-	546	0.147071	0.0443744	1.72872	1	1
FBtr0332778	FBgn0264468	-	421	0	0	0	1	1
FBtr0339078	FBgn0265194	-	7253	0.0330864	0.140016	-2.08128	1	1
FBtr0074461	FBgn0026058	-	1289	0.143235	0.115703	0.307963	1	1
FBtr0074462	FBgn0030870	-	1860	19.5863	22.8138	-0.220061	1	1
FBtr0074463	FBgn0000617	-	1124	14.2947	17.1839	-0.265583	0.528	0.999568
FBtr0074464	FBgn0030872	-	1803	20.7178	19.28	0.103764	0.79115	0.999568
FBtr0074465	FBgn0030874	-	1309	21.999	25.0049	-0.184776	0.4265	0.999568
FBtr0074466	FBgn0052557	-	2131	4.77167	3.20218	0.575441	0.05245	0.999568
FBtr0074467	FBgn0052554	-	817	3.73715	3.39626	0.137993	0.86825	0.999568
FBtr0304649	FBgn0262366	-	1529	5.5391	6.16152	-0.153636	1	1
FBtr0304642	FBgn0262361	-	377	0	0.0863381	#NAME?	1	1
FBtr0304643	FBgn0262362	-	1067	0.0618076	0.118378	-0.937539	1	1
FBtr0304640	FBgn0262359	-	468	0	0.057825	#NAME?	1	1
FBtr0304641	FBgn0262360	-	455	0	0.119253	#NAME?	1	1
FBtr0304646	FBgn0262364	-	584	1.75803	0.927937	0.92186	0.10895	0.999568
FBtr0304647	FBgn0262365	-	488	0.175915	0.21385	-0.281717	1	1
FBtr0304644	FBgn0262362	-	479	0.122163	0.192641	-0.657112	1	1
FBtr0304645	FBgn0262363	-	329	0	0.116568	#NAME?	1	1
TCONS_00218638	XLOC_066627	-	282	0.760081	0.352007	1.11055	1	1
FBtr0082865	FBgn0016672	-	1402	48.7492	52.457	-0.105755	0.5873	0.999568
FBtr0082864	FBgn0047199	-	827	47.3652	48.0431	-0.0205023	0.9458	0.999568
FBtr0082866	FBgn0015270	-	1995	25.7664	30.8565	-0.260084	0.7591	0.999568
FBtr0082861	FBgn0038160	-	494	2.25067	1.88679	0.254421	1	1
FBtr0082860	FBgn0003060	-	568	0.135753	0.155488	-0.195815	1	1
FBtr0082863	FBgn0000576	-	2478	0.260912	0.221743	0.234677	1	1
FBtr0082862	FBgn0038160	-	1122	0.0535188	0.0758532	-0.503163	1	1
Novel000214.1	Novel000214	-	1255	0.461103	0.478952	-0.0547939	0.5003	0.999568
FBtr0082869	FBgn0038195	-	1981	59.7186	57.3393	0.0586575	0.81115	0.999568
FBtr0303148	FBgn0004369	-	7109	0.479507	0.544601	-0.183647	0.82515	0.999568
FBtr0303149	FBgn0041242	-	1206	0.377011	0.328372	0.199277	0.93195	0.999568
FBtr0331445	FBgn0002673	-	2240	0.707088	0.860274	-0.282905	0.9068	0.999568
TCONS_00504191	XLOC_113388	-	209	0	1.09696	#NAME?	1	1
TCONS_00963876	XLOC_191865	-	230	0.413658	0	inf	1	1
FBtr0305599	FBgn0052644	-	2012	0.907326	2.63526	-1.53825	0.00055	0.0717115
FBtr0305598	FBgn0052642	-	1318	10.597	17.9593	-0.761077	1	1
FBtr0305591	FBgn0030425	-	2126	9.83475	8.3139	0.242364	1	1
FBtr0305593	FBgn0011826	-	4551	0.388809	0.290615	0.419952	1	1
FBtr0305592	FBgn0262739	-	7888	6.98736	5.22505	0.419303	0.32105	0.999568
FBtr0305595	FBgn0035097	-	1326	0.353471	0.230956	0.613975	0.44555	0.999568
FBtr0305596	FBgn0262679	-	879	1.22401	1.05993	0.207638	0.67155	0.999568
FBtr0087565	FBgn0261270	-	1521	121.043	136.419	-0.172524	0.36665	0.999568
FBtr0087564	FBgn0261270	-	1887	4.7627	5.83942	-0.294046	0.7406	0.999568
FBtr0087562	FBgn0033921	-	1942	41.4931	43.1929	-0.0579224	0.77295	0.999568
FBtr0087561	FBgn0033925	-	1328	23.9044	27.162	-0.18431	0.40725	0.999568
FBtr0087560	FBgn0033926	-	2371	259.191	239.425	0.114444	0.5518	0.999568
FBtr0087569	FBgn0033915	-	3198	42.4361	49.5391	-0.223274	0.25135	0.999568
FBtr0087568	FBgn0001220	-	2922	0.554272	0.485179	0.192076	0.90335	0.999568
FBtr0344288	FBgn0037960	-	1952	2.18776	1.26825	0.786611	0.5211	0.999568
FBtr0344289	FBgn0037577	-	592	0.5521	0.378126	0.546065	0.8444	0.999568
FBtr0344284	FBgn0261552	-	2889	0.356877	0.286585	0.316465	0.8917	0.999568
FBtr0344285	FBgn0038756	-	401	5.72075	3.59554	0.669995	0.73335	0.999568
FBtr0344282	FBgn0067783	-	2089	0.616744	0.649021	-0.0735941	0.96755	0.999568
FBtr0344283	FBgn0261552	-	10080	0.22868	0.447531	-0.968654	0.4725	0.999568
FBtr0344280	FBgn0067783	-	1901	2.01751	3.06605	-0.603806	0.4822	0.999568
FBtr0344281	FBgn0067783	-	1440	1.62181	2.336	-0.526431	0.6621	0.999568
Novel000224.1	Novel000224	-	780	0	0	0	1	1
TCONS_00645002	XLOC_142916	-	209	0	0	0	1	1
FBtr0085848	FBgn0039881	-	1106	4.22527	3.16919	0.414932	0.4751	0.999568
FBtr0085849	FBgn0266268	-	1407	60.5976	59.3159	0.0308426	0.8749	0.999568
FBtr0085846	FBgn0039879	-	1812	0.193969	0.244356	-0.333158	1	1
FBtr0085847	FBgn0039881	-	1145	3.21923	2.86861	0.166363	0.8274	0.999568
FBtr0085844	FBgn0005632	-	8682	7.92569	8.99522	-0.182621	0.75755	0.999568
FBtr0085845	FBgn0027620	-	5079	54.8797	64.1381	-0.224909	0.24355	0.999568
FBtr0085842	FBgn0039875	-	2280	6.95175	7.69209	-0.146	1	1
FBtr0085843	FBgn0005632	-	9194	33.1994	40.1696	-0.274947	0.3119	0.999568
FBtr0085840	FBgn0022349	-	2698	0.0872586	0.251974	-1.5299	1	1
FBtr0085841	FBgn0022349	-	2628	0.105888	0.127801	-0.271352	1	1
FBtr0089172	FBgn0011747	-	5291	16.8746	14.32	0.236816	0.67675	0.999568
FBtr0089173	FBgn0011747	-	5101	6.93658	10.7173	-0.627647	0.42345	0.999568
FBtr0089170	FBgn0052006	-	1684	0.319329	0.233749	0.450086	1	1
FBtr0089171	FBgn0011747	-	5176	105.791	99.8784	0.0829664	0.7022	0.999568
FBtr0089176	FBgn0017545	-	854	26.8706	25.7399	0.0620171	0.98575	0.999568
FBtr0089175	FBgn0017545	-	910	4811.72	4026.26	0.257115	1	1
FBtr0089178	FBgn0004859	-	4941	5.82523	4.16798	0.482965	0.05775	0.999568
FBtr0089179	FBgn0025740	-	6716	17.0721	18.4223	-0.109816	1	1
FBtr0079966	FBgn0032184	-	576	0	0.0818238	#NAME?	1	1
FBtr0079964	FBgn0051874	-	1623	0.279722	0.365068	-0.384174	0.78115	0.999568
FBtr0079962	FBgn0032189	-	1259	65.2951	70.8101	-0.116979	0.54785	0.999568
TCONS_00455282	XLOC_108436	-	200	2.40734	0	inf	0.22235	0.999568
FBtr0079960	FBgn0032191	-	2205	54.8967	59.1669	-0.108071	0.5696	0.999568
FBtr0079969	FBgn0032181	-	1182	0.942361	0.929253	0.0202086	0.9895	0.999568
FBtr0073843	FBgn0030514	-	3113	38.721	44.0851	-0.187176	0.32865	0.999568
FBtr0073842	FBgn0001087	-	3853	22.3822	26.7745	-0.258512	0.2137	0.999568
FBtr0073841	FBgn0001612	-	3571	31.6858	37.0049	-0.223879	0.63155	0.999568
FBtr0073840	FBgn0030520	-	2368	109.801	109.472	0.00433012	0.9913	0.999568
FBtr0073847	FBgn0030506	-	3040	14.9558	17.0393	-0.188166	0.3591	0.999568
TCONS_00729585	XLOC_174896	-	245	1.20435	0	inf	1	1
TCONS_00967571	XLOC_198169	-	204	1.40608	0.62376	1.17261	1	1
FBtr0073845	FBgn0030512	-	4321	30.1478	33.3653	-0.146296	0.4844	0.999568
TCONS_00956585	XLOC_218163	-	205	1.44938	0	inf	1	1
FBtr0073844	FBgn0030512	-	4375	3.28111	2.96569	0.145814	0.838	0.999568
FBtr0084718	FBgn0039251	-	1870	18.393	21.3415	-0.214499	0.5863	0.999568
FBtr0084715	FBgn0039249	-	2980	1.86335	1.17937	0.659887	0.2248	0.999568
FBtr0084716	FBgn0039250	-	2511	20.4058	22.9962	-0.172415	0.58285	0.999568
FBtr0084711	FBgn0043799	-	1699	1.8651	1.42081	0.392544	0.8835	0.999568
FBtr0084710	FBgn0039241	-	2272	91.9071	84.5345	0.120635	0.6406	0.999568
FBtr0084713	FBgn0039246	-	1933	0.119545	0.182222	-0.608148	1	1
FBtr0084712	FBgn0039244	-	2038	3.89784	3.28522	0.246683	0.41475	0.999568
FBtr0340455	FBgn0263395	-	5041	0.321243	0.355328	-0.145486	0.9261	0.999568
FBtr0340454	FBgn0263395	-	4330	0	0	0	1	1
FBtr0345627	FBgn0028737	-	960	22.3377	20.0574	0.155346	0.9027	0.999568
FBtr0082006	FBgn0040534	-	370	151.203	147.131	0.0393809	0.864	0.999568
FBtr0082005	FBgn0264075	-	3108	3.7753	4.66003	-0.303749	0.4951	0.999568
FBtr0082004	FBgn0002932	-	3989	3.53224	3.56964	-0.0151952	0.97795	0.999568
FBtr0082003	FBgn0002932	-	3992	0.000779027	0.00364497	-2.22616	1	1
FBtr0082002	FBgn0002932	-	3753	0.452882	2.07248	-2.19415	0.14285	0.999568
FBtr0082001	FBgn0002932	-	3756	0	0.00134122	#NAME?	1	1
FBtr0345620	FBgn0034974	-	2931	0.159154	0.216266	-0.442386	1	1
FBtr0340459	FBgn0034417	-	2707	1.40854	1.00098	0.492792	0.46015	0.999568
FBtr0345629	FBgn0033476	-	3556	0	0.0515515	#NAME?	1	1
FBtr0345628	FBgn0034354	-	943	3.86674	4.56397	-0.23917	0.70995	0.999568
FBtr0342938	FBgn0265956	-	764	0.117486	0.0740801	0.665331	1	1
FBtr0340458	FBgn0034417	-	2380	0.495655	0.111089	2.15762	0.25285	0.999568
FBtr0333842	FBgn0036279	-	4762	0.783161	0.443964	0.818866	0.48595	0.999568
FBtr0342932	FBgn0265957	-	900	0	0	0	1	1
FBtr0342933	FBgn0265957	-	1051	0.443861	0.554122	-0.320096	0.90325	0.999568
FBtr0342930	FBgn0265952	-	931	0.140847	0.0860044	0.711642	1	1
FBtr0342931	FBgn0031692	-	688	0	0	0	1	1
FBtr0342936	FBgn0016076	-	3890	0.61847	0.413839	0.579636	0.6527	0.999568
FBtr0342937	FBgn0265956	-	1161	0.130041	0.119771	0.118686	1	1
FBtr0342934	FBgn0031696	-	4091	7.27816	8.32234	-0.193416	0.60655	0.999568
FBtr0342935	FBgn0265955	-	514	0	0	0	1	1
FBtr0301458	FBgn0032940	-	3928	0	0.744074	0	1	1
FBtr0301459	FBgn0032940	-	4837	0	0.447116	0	1	1
FBtr0301454	FBgn0026401	-	6604	11.197	13.2371	-0.241481	0.6508	0.999568
FBtr0301455	FBgn0026401	-	6639	11.5187	12.1099	-0.0722087	0.8979	0.999568
FBtr0301456	FBgn0026401	-	6611	10.8777	11.9165	-0.131576	0.81085	0.999568
FBtr0301457	FBgn0032940	-	4834	0	11.2966	-0.0570699	1	1
FBtr0301450	FBgn0030505	-	5243	8.73196	10.0616	-0.204476	0.41325	0.999568
FBtr0301451	FBgn0030505	-	6009	0.337018	0.383492	-0.186372	0.88945	0.999568
FBtr0301452	FBgn0026787	-	2551	30.4035	31.1348	-0.0342938	0.90435	0.999568
FBtr0306102	FBgn0260439	-	2588	0	0	0	1	1
FBtr0306101	FBgn0051374	-	3272	2.30488	1.80831	0.35005	0.54795	0.999568
FBtr0306100	FBgn0051374	-	2146	0	0	0	1	1
FBtr0306107	FBgn0004449	-	12169	1.82242	1.29773	0.489869	0.28775	0.999568
FBtr0306106	FBgn0004436	-	1142	66.2189	63.0102	0.0716586	1	1
FBtr0306105	FBgn0265266	-	467	0.127499	0.230152	-0.852099	1	1
FBtr0306104	FBgn0039690	-	897	1.63144	1.3476	0.275744	0.8192	0.999568
FBtr0346983	FBgn0267571	-	3391	0.221373	0.0482153	2.19892	1	1
TCONS_00797550	XLOC_163585	-	223	0	1.62375	#NAME?	1	1
FBtr0333840	FBgn0036279	-	4044	0.113813	0.356836	-1.64859	1	1
FBtr0331650	FBgn0085201	-	303	2.07959	3.25487	-0.646304	0.77845	0.999568
FBtr0346982	FBgn0267571	-	3055	6.1e-05	0.178711	-11.5176	1	1
FBtr0302374	FBgn0028371	-	5339	0.397258	9.98e-05	11.959	0.4113	0.999568
FBtr0302375	FBgn0260748	-	4563	1.20464	0.944861	0.350423	0.75505	0.999568
FBtr0302376	FBgn0260748	-	4573	0.144428	0.0827418	0.803657	1	1
FBtr0302377	FBgn0260748	-	1967	3.25101	2.25192	0.529736	0.60795	0.999568
FBtr0302370	FBgn0015019	-	2086	11.1447	9.61141	0.213533	0.80155	0.999568
FBtr0302371	FBgn0015019	-	2071	3.45792	3.71556	-0.103676	0.9449	0.999568
FBtr0302372	FBgn0054049	-	967	0.0671509	0.0817544	-0.28389	1	1
FBtr0302378	FBgn0000229	-	1797	0.500501	0.557315	-0.15512	0.92995	0.999568
FBtr0302379	FBgn0038083	-	1667	2.35222	3.79616	-0.690519	0.04375	0.999568
FBtr0332101	FBgn0000541	-	8652	1.83069	2.34725	-0.358582	0.733	0.999568
FBtr0332005	FBgn0264344	-	505	0.566642	0.452161	0.325601	0.79865	0.999568
FBtr0332102	FBgn0000541	-	9296	0.99548	1.09752	-0.140789	0.92005	0.999568
FBtr0332004	FBgn0264344	-	590	0	0	0	1	1
FBtr0070178	FBgn0003638	-	4836	0.691913	0.894386	-0.370308	0.85065	0.999568
FBtr0070179	FBgn0040398	-	1107	166.091	118.995	0.481065	0.0598	0.999568
FBtr0332007	FBgn0264341	-	789	0.618852	0.424094	0.545212	0.403	0.999568
FBtr0070172	FBgn0029552	-	590	0.0854747	0.278735	-1.70533	1	1
FBtr0070173	FBgn0040337	-	1412	20.8844	20.4752	0.0285506	0.9648	0.999568
FBtr0070170	FBgn0040347	-	2155	36.5255	42.7746	-0.227851	0.26455	0.999568
FBtr0070171	FBgn0042146	-	667	0.324431	0.499314	-0.622038	0.4344	0.999568
FBtr0070176	FBgn0003638	-	3199	13.5888	15.6194	-0.200925	0.68815	0.999568
FBtr0070177	FBgn0003638	-	4056	0.626138	0.678889	-0.116695	0.96485	0.999568
FBtr0070174	FBgn0053082	-	796	2.80512	2.01688	0.475939	1	1
FBtr0070175	FBgn0014903	-	1358	43.6491	28.9496	0.592412	0.2647	0.999568
FBtr0303601	FBgn0261928	-	9928	3.5e-05	3.77e-05	-0.105998	1	1
FBtr0078369	FBgn0028663	-	699	272.969	217.154	0.330017	1	1
FBtr0078368	FBgn0015283	-	1422	4.79908	3.38084	0.505373	0.7157	0.999568
FBtr0078366	FBgn0037094	-	3810	5.36962	4.35641	0.301679	0.6902	0.999568
FBtr0078365	FBgn0037094	-	3143	1.78392	2.1794	-0.288885	0.82975	0.999568
FBtr0078364	FBgn0037094	-	3070	0.518459	0.522167	-0.0102814	0.9901	0.999568
FBtr0078363	FBgn0037094	-	3041	12.8399	12.5741	0.0301788	0.9595	0.999568
FBtr0078362	FBgn0037094	-	3348	14.7144	16.5766	-0.171918	0.70465	0.999568
FBtr0078361	FBgn0037094	-	3370	10.0236	10.8249	-0.110961	0.8433	0.999568
FBtr0343197	FBgn0034841	-	1528	0.107326	0.124586	-0.215141	1	1
FBtr0343195	FBgn0034833	-	1099	0	0	0	1	1
FBtr0343194	FBgn0266009	-	677	0.109444	0.195889	-0.839845	1	1
FBtr0345585	FBgn0005626	-	3806	0.1014	0.0465389	1.12355	1	1
FBtr0343193	FBgn0266008	-	977	0.0879597	0.181731	-1.04689	1	1
FBtr0343192	FBgn0021979	-	1259	3.19656	0.978091	1.70848	0.31925	0.999568
FBtr0343191	FBgn0021979	-	1259	6.79383	4.05609	0.744137	0.44155	0.999568
FBtr0072423	FBgn0035073	-	3322	17.8587	17.4612	0.0324712	0.88005	0.999568
FBtr0333845	FBgn0036876	-	1592	4.00747	2.25256	0.831128	0.11245	0.999568
FBtr0079181	FBgn0031763	-	832	0.0547476	0.0989871	-0.854444	1	1
FBtr0079182	FBgn0051643	-	2938	7.98541	5.84273	0.450725	0.54225	0.999568
FBtr0079183	FBgn0031768	-	1700	6.92342	8.02613	-0.213219	0.78245	0.999568
FBtr0079184	FBgn0031768	-	1612	8.48458	8.29096	0.0333032	0.9651	0.999568
FBtr0079185	FBgn0031769	-	1832	6.9826	14.297	-1.03387	1	1
FBtr0079186	FBgn0031769	-	1978	4.57315	4.44535	0.0408894	0.9696	0.999568
FBtr0079187	FBgn0031770	-	3379	0.547569	0.432986	0.338721	0.43865	0.999568
FBtr0079188	FBgn0031772	-	631	1.24722	1.13289	0.138709	0.9524	0.999568
FBtr0079189	FBgn0031774	-	1377	0.352221	0.371531	-0.0770018	0.9582	0.999568
FBtr0303421	FBgn0004910	-	880	2.2145	1.17686	0.912037	0.5126	0.999568
FBtr0303420	FBgn0004910	-	2552	1.82988	1.61939	0.176296	0.7902	0.999568
FBtr0303427	FBgn0051044	-	4439	0	0	0	1	1
FBtr0303426	FBgn0051044	-	1768	0	0	0	1	1
FBtr0303425	FBgn0053483	-	728	0	2.95e-06	#NAME?	1	1
FBtr0347418	FBgn0023083	-	3373	0.110191	0.058093	0.923566	1	1
FBtr0347412	FBgn0039487	-	2449	0.82469	1.74059	-1.07765	1	1
FBtr0347413	FBgn0267592	-	4002	0	0	0	1	1
FBtr0347410	FBgn0032820	-	1202	35.3773	32.6683	0.114931	0.75105	0.999568
FBtr0347411	FBgn0085339	-	701	0	0.100452	#NAME?	1	1
FBtr0347416	FBgn0000808	-	2234	0.646489	0.842485	-0.382026	0.67705	0.999568
FBtr0347417	FBgn0023083	-	3464	2.90133	1.44076	1.00988	0.21645	0.999568
FBtr0347414	FBgn0264953	-	10101	0.222967	0.3771	-0.758115	0.54375	0.999568
FBtr0347415	FBgn0264953	-	10506	0	0.00178415	#NAME?	1	1
TCONS_00525828	XLOC_120586	-	203	0	1.28158	#NAME?	1	1
FBtr0078588	FBgn0037406	-	1161	0.072306	0.0816453	-0.175255	1	1
FBtr0078582	FBgn0027339	-	13458	0	0	0	1	1
FBtr0078587	FBgn0037405	-	2302	19.3925	33.9108	-0.806244	0.00015	0.0269878
FBtr0308921	FBgn0051386	-	2763	0.06772	0.0617657	0.132775	1	1
FBtr0078585	FBgn0037402	-	694	5.76e-06	0.0313239	-12.409	1	1
FBtr0078584	FBgn0046878	-	899	1.67625	1.7463	-0.0590625	0.92095	0.999568
FBtr0330149	FBgn0263108	-	3336	1.92754	2.02715	-0.0726951	0.94905	0.999568
FBtr0076639	FBgn0052351	-	2093	0.176376	0.150036	0.233352	1	1
FBtr0076638	FBgn0035915	-	2121	0.171708	0.172635	-0.00776912	1	1
FBtr0076637	FBgn0035914	-	3611	0.104505	0.11367	-0.121274	1	1
FBtr0076633	FBgn0017579	-	619	2797.91	2293.5	0.286797	0.1537	0.999568
FBtr0330147	FBgn0262139	-	4570	0	0.0229272	#NAME?	1	1
FBtr0330144	FBgn0261929	-	4014	0.0115405	0.03532	-1.61378	1	1
FBtr0330145	FBgn0261934	-	10224	0.031028	0.0901032	-1.53801	1	1
FBtr0081914	FBgn0037622	-	3092	21.6708	24.5326	-0.17895	0.37155	0.999568
FBtr0077588	FBgn0031526	-	973	0.697283	0.730392	-0.0669265	0.8983	0.999568
FBtr0077589	FBgn0016698	-	1393	26.4624	26.872	-0.0221602	0.92045	0.999568
FBtr0077586	FBgn0031522	-	1631	12.5488	9.74024	0.365524	0.2969	0.999568
FBtr0077587	FBgn0031523	-	1565	18.9066	15.6539	0.272368	0.33635	0.999568
FBtr0077584	FBgn0053281	-	1594	3.89056	2.52952	0.621112	0.0677	0.999568
FBtr0077583	FBgn0031520	-	1835	1.48835	1.60099	-0.105251	0.86355	0.999568
FBtr0077580	FBgn0031517	-	1646	28.1698	23.1565	0.282732	0.3166	0.999568
FBtr0081910	FBgn0037616	-	1615	0.0192834	0.0183255	0.0735051	1	1
FBtr0081911	FBgn0037617	-	1217	6.40004	6.33254	0.0152971	1	1
FBtr0113391	FBgn0051116	-	3613	1.96653	1.26773	0.633413	0.29345	0.999568
FBtr0081912	FBgn0037618	-	1141	0.344781	0.183922	0.906586	1	1
FBtr0339339	FBgn0265305	-	436	0	0.129667	#NAME?	1	1
FBtr0076181	FBgn0036155	-	2020	0.384212	0.193255	0.991399	0.53165	0.999568
FBtr0076183	FBgn0036152	-	2792	8.49097	9.47016	-0.157459	1	1
FBtr0076182	FBgn0036154	-	1058	0.103322	8.97e-05	10.1691	1	1
FBtr0076185	FBgn0036150	-	2443	0.11549	0.102002	0.179175	1	1
FBtr0076187	FBgn0036147	-	2630	45.9317	36.9319	0.314624	0.1237	0.999568
FBtr0076186	FBgn0061469	-	3674	16.549	18.2126	-0.138196	0.49575	0.999568
FBtr0076189	FBgn0036144	-	3755	0.000177005	0.000173625	0.027818	1	1
FBtr0076188	FBgn0036147	-	2544	3.70667	2.84584	0.381271	0.64185	0.999568
FBtr0346018	FBgn0030968	-	1183	1.98233	1.50319	0.399174	0.7207	0.999568
FBtr0339336	FBgn0033327	-	1649	1.02327	0.653479	0.646975	0.2882	0.999568
FBtr0343917	FBgn0266250	-	986	0.112242	0.0200735	2.48325	1	1
FBtr0343916	FBgn0266249	-	1475	0.149768	0.222139	-0.568734	1	1
FBtr0343915	FBgn0266248	-	1946	0.0804585	0.0631863	0.348632	1	1
FBtr0343914	FBgn0266247	-	422	0.0785055	0	inf	1	1
[truncated: 32,269 more rows]

## Sheet: 7 day(DR) vs 7 day(fully fed) 
transcript_id	gene_id	gene_name	length	7_day_DR_FPKM	7_day_fully fed_FPKM	log2(foldchange)	pvalue	qvalue
FBtr0333190	FBgn0037664	-	1343	0.317014	0.529049	-0.738854	0.7626	0.999568
FBtr0332112	FBgn0040308	-	1007	0.0793818	0.382522	-2.26866	1	1
FBtr0333191	FBgn0038181	-	4111	0.761061	0	inf	0.11475	0.999568
FBtr0077629	FBgn0031478	-	1785	63.8066	63.819	-0.000281106	0.9988	0.999573
FBtr0077628	FBgn0031476	-	998	1.59942	1.14036	0.488066	0.8898	0.999568
TCONS_00244019	XLOC_068108	-	219	0.516727	0	inf	1	1
FBtr0077623	FBgn0015521	-	619	4.00306	4.69917	-0.231302	0.94025	0.999568
FBtr0077622	FBgn0015521	-	415	1.50727	1.27024	0.246838	0.5353	0.999568
FBtr0077621	FBgn0015521	-	391	1975.28	1559.65	0.34083	1	1
FBtr0077627	FBgn0031474	-	2889	2.08992	2.11708	-0.0186273	0.98075	0.999568
FBtr0077626	FBgn0031474	-	2998	24.3256	25.0558	-0.0426654	0.846	0.999568
FBtr0077625	FBgn0031474	-	3088	2.87103	4.21916	-0.555387	0.3643	0.999568
FBtr0072052	FBgn0034834	-	1410	0.0862802	0.0783446	0.139196	1	1
FBtr0072051	FBgn0040063	-	788	0.1402	0.0792016	0.823883	1	1
FBtr0072050	FBgn0040063	-	1249	0.0364845	0.0301446	0.275388	1	1
FBtr0072057	FBgn0034870	-	870	0.460571	0.32735	0.492589	0.4809	0.999568
FBtr0072056	FBgn0034869	-	1052	0.040737	0.147581	-1.8571	1	1
TCONS_00008305	XLOC_005893	-	201	0	0	0	1	1
FBtr0072059	FBgn0041234	-	1221	0.358951	0.231572	0.632328	1	1
FBtr0072058	FBgn0261786	-	3845	26.2013	32.9076	-0.328782	0.10165	0.999568
FBtr0088225	FBgn0029134	-	1139	281.882	276.386	0.0284071	0.87825	0.999568
FBtr0088224	FBgn0029134	-	1076	6.72715	8.79091	-0.386016	0.76445	0.999568
FBtr0088227	FBgn0033557	-	3220	28.7697	29.5533	-0.0387689	1	1
FBtr0088226	FBgn0033555	-	724	61.8359	55.8689	0.146401	0.5061	0.999568
FBtr0088221	FBgn0033547	-	1200	0.125185	0.733112	-2.54997	0.39695	0.999568
FBtr0088223	FBgn0033551	-	1523	50.6749	51.4206	-0.0210751	0.91595	0.999568
FBtr0088222	FBgn0033549	-	1138	36.1964	40.2197	-0.152058	0.54345	0.999568
FBtr0088228	FBgn0263510	-	1549	50.1628	42.7946	0.22919	0.254	0.999568
TCONS_00091941	XLOC_032088	-	222	1.42605	1.28994	0.144721	1	1
FBtr0308321	FBgn0023531	-	6762	1.33375	1.23164	0.114908	0.8369	0.999568
FBtr0308320	FBgn0029587	-	3151	0.440632	0.407591	0.112451	0.9428	0.999568
FBtr0308323	FBgn0023531	-	6713	0.109529	0	inf	1	1
FBtr0308322	FBgn0023531	-	3799	0.105158	0.194552	-0.887603	1	1
FBtr0308325	FBgn0002873	-	7938	15.4353	19.6489	-0.348218	0.2103	0.999568
FBtr0308324	FBgn0023531	-	6806	0	0.158253	#NAME?	1	1
FBtr0308327	FBgn0002873	-	8457	0	0.000215435	#NAME?	1	1
FBtr0308326	FBgn0002873	-	6286	0.0569223	0.048943	0.21789	1	1
FBtr0308329	FBgn0002873	-	7097	0.217341	0.429826	-0.983791	0.7339	0.999568
FBtr0308328	FBgn0002873	-	8643	7.69811	10.5414	-0.453483	0.23175	0.999568
TCONS_00960819	XLOC_188047	-	204	2.10971	0.661658	1.67289	1	1
TCONS_00212738	XLOC_057649	-	202	0	0.65857	#NAME?	1	1
TCONS_00003463	XLOC_001635	-	464	0.644536	0.523038	0.301346	0.71965	0.999568
FBtr0085138	FBgn0003495	-	2050	7.19403	7.71915	-0.101643	0.7892	0.999568
FBtr0085139	FBgn0003495	-	1909	1.65889	1.59612	0.0556507	0.95245	0.999568
FBtr0085132	FBgn0039487	-	2635	8.86665	9.52256	-0.10296	0.7026	0.999568
FBtr0085133	FBgn0039486	-	1130	10.8915	6.31634	0.786048	0.0084	0.497266
FBtr0085130	FBgn0039491	-	2897	0.25821	0.193353	0.41731	1	1
FBtr0085131	FBgn0039488	-	1556	23.0755	27.4751	-0.251761	0.2482	0.999568
FBtr0085136	FBgn0039480	-	1514	0.0917279	0.0638628	0.522385	1	1
FBtr0085137	FBgn0003495	-	2128	2.84412	2.84997	-0.00296501	0.9968	0.999568
FBtr0085135	FBgn0039481	-	1054	1.00658	0.825949	0.285343	0.5672	0.999568
FBtr0332234	FBgn0262475	-	4146	0	0.170346	#NAME?	1	1
TCONS_00952124	XLOC_210443	-	214	1.73664	1.00155	0.794064	1	1
Novel000069.1	Novel000069	-	212	1.21328	0	inf	1	1
FBtr0333107	FBgn0260442	-	9521	0	0.193735	#NAME?	1	1
FBtr0073015	FBgn0035372	-	1296	43.1533	39.6698	0.121428	0.55335	0.999568
FBtr0073016	FBgn0035371	-	3020	18.3969	19.7074	-0.0992717	0.6267	0.999568
FBtr0333104	FBgn0264510	-	1258	0.756788	0.831551	-0.135915	0.95725	0.999568
FBtr0073010	FBgn0035380	-	1631	0.133528	0.186996	-0.485862	1	1
FBtr0073011	FBgn0035379	-	1996	0.66522	0.473918	0.489193	0.30545	0.999568
FBtr0309056	FBgn0033958	-	4422	1.59219	1.00822	0.659197	0.13625	0.999568
FBtr0309057	FBgn0263376	-	1665	0.131136	0.118502	0.146153	1	1
FBtr0333109	FBgn0260442	-	9722	1.53144	0.238474	2.68298	0.2997	0.999568
FBtr0333108	FBgn0260442	-	9265	0.782275	0.922505	-0.237882	0.86575	0.999568
FBtr0303755	FBgn0038508	-	710	0.473551	0.337747	0.487578	0.51835	0.999568
FBtr0303757	FBgn0027596	-	5340	3.57345	2.5238	0.501722	0.2014	0.999568
FBtr0303756	FBgn0027596	-	4522	1.45022	0.850153	0.770477	0.25985	0.999568
FBtr0303751	FBgn0261934	-	3009	4.86985	5.99783	-0.300563	0.46435	0.999568
FBtr0303750	FBgn0261934	-	11586	0.691795	0.767374	-0.149586	0.8191	0.999568
FBtr0303759	FBgn0033984	-	3841	18.1843	21.0997	-0.214524	0.29425	0.999568
FBtr0303758	FBgn0027596	-	1942	0.653641	0.555501	0.234708	0.8808	0.999568
FBtr0332110	FBgn0024806	-	5914	0	0.15937	#NAME?	1	1
FBtr0345678	FBgn0004055	-	4114	0.273089	0.307729	-0.172286	1	1
FBtr0110942	FBgn0028931	-	2184	4.03578	4.90233	-0.28062	0.3464	0.999568
FBtr0110941	FBgn0028539	-	5141	32.3487	33.804	-0.06349	0.7981	0.999568
FBtr0110947	FBgn0083973	-	892	0.00490398	0.00972471	-0.987703	1	1
FBtr0110944	FBgn0083972	-	706	13.2534	9.44797	0.48829	0.6582	0.999568
FBtr0345670	FBgn0266861	-	700	0.135944	0.218415	-0.684059	1	1
FBtr0081259	FBgn0032814	-	2062	13.5453	15.5246	-0.196764	0.385	0.999568
FBtr0081258	FBgn0027949	-	1366	46.7278	53.7602	-0.202258	0.36805	0.999568
FBtr0345671	FBgn0266862	-	641	0.115936	0.175553	-0.598587	1	1
FBtr0081253	FBgn0003231	-	2305	178.144	167.169	0.0917359	1	1
FBtr0081252	FBgn0032804	-	703	0.166413	0.0311976	2.41526	1	1
FBtr0081251	FBgn0032803	-	1316	1.41216	1.02869	0.457095	0.3037	0.999568
FBtr0081250	FBgn0051697	-	657	0.927709	0.680535	0.447003	0.876	0.999568
FBtr0081257	FBgn0032810	-	1146	1.24871	1.02134	0.289967	0.71455	0.999568
FBtr0081256	FBgn0032809	-	910	3.32624	2.30806	0.52721	0.21235	0.999568
FBtr0081254	FBgn0041180	-	4694	33.4048	24.9399	0.4216	0.05665	0.999568
FBtr0345673	FBgn0001269	-	4776	0.153187	0.075857	1.01394	1	1
FBtr0345674	FBgn0050489	-	4482	0.31378	0.271925	0.206547	1	1
FBtr0345675	FBgn0040765	-	3037	0	0.0343375	#NAME?	1	1
FBtr0074549	FBgn0030900	-	920	0.312121	0.152713	1.03128	1	1
FBtr0345676	FBgn0034470	-	922	0.48803	0.481535	0.0193295	0.9086	0.999568
FBtr0334601	FBgn0039186	-	2592	0.84382	1.67979	-0.993274	0.3977	0.999568
FBtr0074540	FBgn0030883	-	843	32.6861	30.4868	0.100491	0.6713	0.999568
FBtr0074546	FBgn0083228	-	2397	0.31322	0.143688	1.12424	1	1
FBtr0074545	FBgn0030897	-	5686	0.000479948	0.100482	-7.70984	1	1
FBtr0074544	FBgn0030877	-	2289	28.0784	31.9039	-0.184268	0.3804	0.999568
TCONS_00090156	XLOC_028051	-	289	3.07991	2.58572	0.252326	0.9174	0.999568
TCONS_00090155	XLOC_028049	-	221	2.38901	2.13126	0.164709	0.6687	0.999568
FBtr0333173	FBgn0035094	-	2668	4.94914	3.14631	0.653519	0.41725	0.999568
FBtr0334609	FBgn0038975	-	6583	0.0565489	0.216136	-1.93437	1	1
FBtr0086860	FBgn0034264	-	1402	0.866825	0.667547	0.37687	0.8422	0.999568
TCONS_00264388	XLOC_066405	-	249	0	1.05634	#NAME?	0.22975	0.999568
TCONS_00218199	XLOC_065917	-	320	0.539064	0.124715	2.11183	1	1
TCONS_00949096	XLOC_205480	-	743	1.45832	0.765	0.930772	0.4794	0.999568
FBtr0300518	FBgn0267337	-	5014	0.0962365	0.121565	-0.337071	1	1
FBtr0305494	FBgn0029858	-	2809	0.171216	0.109075	0.650494	1	1
FBtr0305495	FBgn0028685	-	1465	122.825	128.926	-0.0699373	0.73255	0.999568
FBtr0305496	FBgn0262631	-	710	0.629943	0.795433	-0.336519	1	1
FBtr0305497	FBgn0026086	-	2042	17.6286	21.5736	-0.291349	0.448	0.999568
FBtr0305490	FBgn0040510	-	3539	0.000432589	0.000408665	0.0820767	1	1
FBtr0305491	FBgn0040510	-	3549	0.000114043	0.000116759	-0.0339576	1	1
TCONS_00485049	XLOC_118356	-	200	2.45313	4.35606	-0.8284	0.4931	0.999568
FBtr0305498	FBgn0026086	-	2839	2.65039	1.76947	0.58289	0.606	0.999568
FBtr0305499	FBgn0026086	-	6954	1.04504	1.14736	-0.134764	0.8788	0.999568
FBtr0112516	FBgn0085346	-	1168	45.0304	41.682	0.111473	0.624	0.999568
FBtr0112514	FBgn0085345	-	907	0.294013	0.288124	0.0291877	1	1
TCONS_00307364	XLOC_047731	-	1370	0.214122	0.214999	-0.00590101	1	1
FBtr0112519	FBgn0016053	-	686	650.156	662.133	-0.0263347	0.8951	0.999568
FBtr0332116	FBgn0052311	-	9761	1.7334	1.75695	-0.0194694	0.9657	0.999568
FBtr0305148	FBgn0031155	-	1226	0.115121	0.168443	-0.549107	1	1
FBtr0305149	FBgn0262735	-	3468	5.86856	6.24058	-0.0886736	0.85455	0.999568
FBtr0305147	FBgn0266848	-	3283	1.21634	1.41347	-0.216693	0.87025	0.999568
FBtr0305145	FBgn0053196	-	26263	0.306342	0.464989	-0.602052	0.3399	0.999568
FBtr0305142	FBgn0053196	-	48068	0.269658	0.181208	0.573482	1	1
FBtr0305141	FBgn0053196	-	47440	0	0	0	1	1
FBtr0309872	FBgn0052707	-	2605	7.18474	9.4299	-0.392306	0.2576	0.999568
FBtr0309873	FBgn0004646	-	2158	2.95249	2.83884	0.0566306	0.9296	0.999568
FBtr0309871	FBgn0030082	-	1493	3.33929	3.55562	-0.0905577	0.9161	0.999568
FBtr0309874	FBgn0004646	-	2794	0.0202777	0	inf	1	1
FBtr0309875	FBgn0004646	-	1689	0	0	0	1	1
FBtr0085961	FBgn0032987	-	614	4204.76	3562.27	0.239227	1	1
FBtr0309878	FBgn0030440	-	717	0.0323679	0.12148	-1.90809	1	1
FBtr0309879	FBgn0033447	-	3569	1.60761e-06	0.000157999	-6.61885	1	1
FBtr0085964	FBgn0032979	-	2636	83.5983	89.7822	-0.102956	0.6759	0.999568
FBtr0085966	FBgn0033047	-	1802	9.48847	9.15738	0.0512392	1	1
FBtr0300516	FBgn0259170	-	3808	3.61178	4.70435	-0.381286	0.49335	0.999568
TCONS_00038793	XLOC_014300	-	200	0	0	0	1	1
FBtr0300514	FBgn0259170	-	3961	2.97446	3.41467	-0.199119	0.7516	0.999568
FBtr0300515	FBgn0259170	-	3853	1.39875	1.16179	0.267793	0.7878	0.999568
FBtr0300512	FBgn0259170	-	3710	0	0	0	1	1
FBtr0300513	FBgn0259170	-	3785	3.30474	3.30429	0.000196867	0.9984	0.999568
FBtr0300510	FBgn0259168	-	4228	0.483285	0.399134	0.275999	0.91085	0.999568
FBtr0300511	FBgn0259170	-	4132	7.08116	7.23098	-0.0302062	0.93755	0.999568
FBtr0089636	FBgn0031883	-	2457	11.3769	11.7	-0.0404105	0.9627	0.999568
FBtr0089631	FBgn0016034	-	1839	0.353561	0.978205	-1.46818	0.4934	0.999568
FBtr0089630	FBgn0034289	-	1991	76.5173	39.8268	0.942046	5e-05	0.0107714
FBtr0089633	FBgn0016034	-	1759	3.00391	2.7153	0.145727	0.8708	0.999568
FBtr0089632	FBgn0016034	-	1830	31.4328	35.2211	-0.164171	1	1
FBtr0301645	FBgn0035504	-	2732	0.297469	0.299525	-0.00993784	1	1
FBtr0301644	FBgn0025790	-	1930	0.519234	0.711334	-0.454142	0.78035	0.999568
FBtr0301647	FBgn0032707	-	2611	0	9.4317e-06	#NAME?	1	1
FBtr0083490	FBgn0038533	-	1134	26.4675	26.3346	0.00726321	0.98525	0.999568
FBtr0301640	FBgn0041707	-	1148	0.272155	0.327864	-0.268666	1	1
FBtr0301643	FBgn0025790	-	2159	6.15622	6.75077	-0.133008	0.7853	0.999568
FBtr0083498	FBgn0038529	-	914	0.122025	0.153705	-0.33298	1	1
FBtr0301649	FBgn0037502	-	1878	0.0302581	0.0282456	0.0992971	1	1
FBtr0301648	FBgn0034921	-	1225	6.17419	3.15465	0.968768	1	1
FBtr0079883	FBgn0032166	-	4136	0.926632	0.817077	0.181526	0.8726	0.999568
FBtr0079885	FBgn0032170	-	2323	0	0	0	1	1
FBtr0079884	FBgn0032169	-	1602	19.795	22.7963	-0.203668	1	1
FBtr0079887	FBgn0032170	-	2224	27.2535	24.3483	0.162621	0.69765	0.999568
FBtr0079886	FBgn0032170	-	2250	7.40169	8.69823	-0.232867	0.75415	0.999568
FBtr0079889	FBgn0015664	-	2872	17.4575	19.8671	-0.186538	0.5652	0.999568
FBtr0079888	FBgn0011272	-	791	58.7317	57.9608	0.0190608	0.98375	0.999568
TCONS_00267125	XLOC_071472	-	213	2.3354	0	inf	0.1021	0.999568
FBtr0333930	FBgn0038858	-	1601	0.907545	0.903546	0.00637226	0.9923	0.999568
FBtr0091914	FBgn0053910	-	595	0	0	0	1	1
FBtr0091916	FBgn0053912	-	498	0	0.0521466	#NAME?	1	1
FBtr0091911	FBgn0053907	-	412	1.5846	2.15528	-0.443753	0.442	0.999568
FBtr0091910	FBgn0053906	-	595	0	0	0	1	1
FBtr0091913	FBgn0053909	-	413	0	0	0	1	1
FBtr0091912	FBgn0053908	-	595	0	0	0	1	1
FBtr0100187	FBgn0000056	-	2024	0	0.00380711	#NAME?	1	1
FBtr0100186	FBgn0035538	-	3834	0.149189	0.23095	-0.630442	1	1
FBtr0100185	FBgn0035538	-	4288	0.416299	0.444798	-0.095531	0.87685	0.999568
FBtr0100184	FBgn0027339	-	4749	0	0	0	1	1
FBtr0100183	FBgn0004907	-	1753	242.637	198.945	0.286429	1	1
FBtr0100182	FBgn0004907	-	974	187.506	176.023	0.0911769	1	1
FBtr0100188	FBgn0045500	-	1161	0.0537031	0.0326971	0.715842	1	1
FBtr0346527	FBgn0035667	-	951	0.387224	0.34692	0.158565	0.91765	0.999568
FBtr0084618	FBgn0039200	-	750	1.31784	0.950666	0.471159	0.39515	0.999568
FBtr0084611	FBgn0053340	-	1152	0.0740468	0.198415	-1.42202	1	1
FBtr0084613	FBgn0053341	-	946	0.0451107	0.168587	-1.90195	1	1
FBtr0084614	FBgn0039194	-	1047	0.162707	0.203686	-0.324073	1	1
FBtr0084617	FBgn0039199	-	1139	0.0560284	0.0500844	0.161799	1	1
FBtr0082722	FBgn0038105	-	1462	13.1044	12.5813	0.058775	0.815	0.999568
FBtr0082723	FBgn0041710	-	1439	1.83087	1.43253	0.353967	0.84865	0.999568
FBtr0345500	FBgn0034763	-	2242	1.27857	1.89435	-0.567172	0.5369	0.999568
FBtr0082721	FBgn0038107	-	707	82.9949	90.178	-0.119752	1	1
FBtr0082726	FBgn0038098	-	2913	0	0.0798084	#NAME?	1	1
FBtr0082727	FBgn0038098	-	2606	91.2006	56.4817	0.691258	0.00075	0.0909587
FBtr0082724	FBgn0038102	-	1136	0.408236	0.923713	-1.17804	0.6871	0.999568
FBtr0345505	FBgn0040091	-	1864	1.72137	1.56772	0.134889	0.8056	0.999568
FBtr0345508	FBgn0026872	-	1474	1.30863	1.06717	0.294269	0.73675	0.999568
FBtr0345509	FBgn0025391	-	2972	0.430068	0.000226918	10.8882	0.0667	0.999568
TCONS_00651723	XLOC_152713	-	203	0.722707	1.92237	-1.41141	1	1
FBtr0100459	FBgn0261278	-	1649	0	0	0	1	1
FBtr0100451	FBgn0053155	-	725	3.32885	1.74656	0.930505	0.75215	0.999568
FBtr0100453	FBgn0053155	-	942	0.885302	0.636943	0.475007	0.8632	0.999568
FBtr0100455	FBgn0001235	-	2462	2.73536	2.11508	0.371017	1	1
FBtr0100454	FBgn0001235	-	3868	0.402475	0.283091	0.507632	0.67605	0.999568
FBtr0100457	FBgn0016917	-	3616	6.14985	6.04245	0.025417	0.97725	0.999568
FBtr0100456	FBgn0032365	-	1515	0.0324296	0.0517162	-0.673304	1	1
FBtr0075155	FBgn0036769	-	1519	43.9717	38.7503	0.182367	0.53635	0.999568
FBtr0346086	FBgn0030620	-	1082	1.74005e-05	3.22137e-05	-0.888546	1	1
FBtr0346087	FBgn0030600	-	16734	2.84373	2.44244	0.219465	0.6347	0.999568
FBtr0346084	FBgn0267086	-	333	4.30199	2.23817	0.942688	0.119	0.999568
FBtr0346085	FBgn0053178	-	825	0.727971	0.607097	0.261954	0.8582	0.999568
FBtr0346082	FBgn0030930	-	3668	1.58609	0.902166	0.814013	0.45975	0.999568
FBtr0346083	FBgn0030933	-	1532	0.000129604	0.211007	-10.669	1	1
FBtr0346080	FBgn0267084	-	1219	0.431843	0.262328	0.719137	0.8144	0.999568
FBtr0346081	FBgn0267085	-	515	0.266529	0.195205	0.449304	1	1
FBtr0346088	FBgn0015773	-	3339	0.512998	0.000116511	12.1043	0.06995	0.999568
FBtr0346089	FBgn0030529	-	1349	86.7292	78.3805	0.146024	1	1
FBtr0331336	FBgn0263220	-	8450	0.44746	0.427818	0.0647618	0.90195	0.999568
FBtr0331334	FBgn0028527	-	2004	0.640051	0.00071616	9.80369	0.1809	0.999568
FBtr0331332	FBgn0028527	-	2404	0.39302	0.293137	0.423025	0.7641	0.999568
FBtr0331333	FBgn0028527	-	2041	1.15493	0.991993	0.219403	0.8355	0.999568
FBtr0331330	FBgn0041180	-	4723	0.369408	0.332878	0.150223	0.94715	0.999568
FBtr0331331	FBgn0264845	-	3555	0.0937296	0.131941	-0.493318	1	1
TCONS_00649078	XLOC_149064	-	201	2.38348	0.719638	1.72772	0.47765	0.999568
FBtr0070639	FBgn0026084	-	896	159.369	192.573	-0.273039	0.2049	0.999568
FBtr0070638	FBgn0000221	-	1450	13.5099	15.1907	-0.169179	0.4943	0.999568
FBtr0079719	FBgn0263852	-	526	99.2629	90.4509	0.13412	0.5881	0.999568
FBtr0330064	FBgn0035715	-	1506	1.1865	0.764255	0.634591	0.75545	0.999568
FBtr0330067	FBgn0024150	-	6417	0.332104	0.510768	-0.621034	0.4349	0.999568
FBtr0330066	FBgn0024150	-	6206	0.522496	0.517204	0.0146876	0.97955	0.999568
FBtr0330061	FBgn0035715	-	1554	2.72588	2.76928	-0.0227855	0.98245	0.999568
FBtr0330060	FBgn0035714	-	882	56.9606	54.8729	0.0538693	1	1
FBtr0330063	FBgn0035715	-	1491	5.55077	4.68236	0.245454	0.76065	0.999568
FBtr0330062	FBgn0035715	-	1542	7.17881	6.74232	0.0905004	0.8954	0.999568
FBtr0079711	FBgn0014417	-	2741	7.09013	3.71626	0.931963	0.51635	0.999568
FBtr0079710	FBgn0032042	-	2774	14.0936	14.0283	0.00669739	1	1
FBtr0079713	FBgn0040959	-	361	195.565	119.461	0.711114	0.00315	0.258052
FBtr0079712	FBgn0001084	-	1688	0.499875	0.227409	1.13628	0.64765	0.999568
FBtr0079715	FBgn0040098	-	792	0.0283459	0.0793608	-1.48529	1	1
FBtr0079714	FBgn0040958	-	337	1.94892	0.9705	1.00587	1	1
FBtr0079716	FBgn0015583	-	767	0.184603	0.110537	0.739896	1	1
FBtr0307179	FBgn0052792	-	1822	0	0.0236186	#NAME?	1	1
FBtr0307178	FBgn0005411	-	1473	120.377	123.507	-0.037036	1	1
FBtr0307175	FBgn0086448	-	1573	16.2524	15.6009	0.0590205	1	1
FBtr0307174	FBgn0086129	-	1972	4.35613	5.04674	-0.212304	0.7916	0.999568
FBtr0307177	FBgn0005411	-	1371	3.10124	3.64241	-0.232048	0.86305	0.999568
FBtr0307176	FBgn0005411	-	1344	3.20894	4.95338	-0.626315	0.6134	0.999568
FBtr0307171	FBgn0032338	-	2350	0.0301745	0.000562204	5.7461	1	1
FBtr0307170	FBgn0035482	-	1859	8.49854	7.97237	0.0922059	0.8083	0.999568
FBtr0307173	FBgn0260400	-	10506	1.11828	0.913988	0.291038	0.5591	0.999568
FBtr0307172	FBgn0039970	-	1145	91.7961	70.7579	0.375541	0.1953	0.999568
TCONS_00667911	XLOC_176897	-	214	0.578494	2.97412	-2.36209	0.1642	0.999568
FBtr0343108	FBgn0032700	-	2418	0.769181	0.242747	1.66387	0.5876	0.999568
FBtr0343109	FBgn0032701	-	1870	1.19047	1.01835	0.225296	0.90165	0.999568
FBtr0343104	FBgn0265995	-	433	0.361606	0.131277	1.4618	1	1
FBtr0343105	FBgn0028888	-	6080	0.201964	0.196029	0.0430306	1	1
FBtr0343106	FBgn0265996	-	619	0.208813	0.148856	0.488301	1	1
FBtr0343107	FBgn0265997	-	237	0.710963	0.323294	1.13693	0.1555	0.999568
FBtr0343100	FBgn0036402	-	2573	4.20483	3.80611	0.143729	0.8715	0.999568
FBtr0343101	FBgn0039145	-	702	8.18313	9.93379	-0.279691	0.79095	0.999568
FBtr0343102	FBgn0264906	-	549	0.438878	0.880995	-1.00531	0.73665	0.999568
FBtr0333177	FBgn0259677	-	7849	0.236595	0.374044	-0.66079	1	1
FBtr0289989	FBgn0003386	-	2428	0.114237	0.0411747	1.4722	1	1
FBtr0289988	FBgn0015519	-	3908	0.0693514	0.0982658	-0.502764	1	1
FBtr0289985	FBgn0034085	-	4589	10.3141	7.56612	0.446992	0.03705	0.999568
FBtr0289986	FBgn0042126	-	1804	0.33838	0.245568	0.462521	1	1
FBtr0289981	FBgn0032475	-	4846	2.43192	1.69645	0.519574	0.5507	0.999568
FBtr0289983	FBgn0035581	-	1656	0.0354672	0.0352463	0.00901357	1	1
FBtr0289982	FBgn0035581	-	13807	0.0744542	0.0940473	-0.337034	1	1
TCONS_00709431	XLOC_138531	-	234	1.47186	0	inf	1	1
FBtr0076772	FBgn0003041	-	5047	8.03531	10.9943	-0.452331	0.2123	0.999568
FBtr0076773	FBgn0003041	-	3311	0.975363	0.598835	0.703781	0.671	0.999568
FBtr0076770	FBgn0035825	-	1340	24.9989	26.7159	-0.0958359	0.70215	0.999568
FBtr0076771	FBgn0003041	-	3673	29.6151	31.5398	-0.0908411	0.69635	0.999568
FBtr0076776	FBgn0016694	-	5065	0	0	0	1	1
FBtr0076777	FBgn0016694	-	5107	0.354397	0.404494	-0.190755	0.88925	0.999568
FBtr0076774	FBgn0003041	-	4685	0.623008	0.625676	-0.00616579	0.9971	0.999568
FBtr0076775	FBgn0016694	-	2828	1.41851	1.3904	0.0288706	0.97505	0.999568
Novel000167.1	Novel000167	-	1094	0.54262	0.508989	0.0923092	0.96145	0.999568
FBtr0340453	FBgn0034420	-	3536	3.42635	1.71001	1.00267	0.171	0.999568
FBtr0340452	FBgn0034420	-	3109	1.19813	0.812078	0.561096	0.6675	0.999568
FBtr0340451	FBgn0034420	-	3154	5.21991	3.48509	0.582829	0.306	0.999568
FBtr0340450	FBgn0000578	-	4417	3.46023	3.78061	-0.127753	0.7399	0.999568
FBtr0340457	FBgn0034417	-	2191	3.70561	2.68297	0.465878	0.275	0.999568
FBtr0340456	FBgn0263395	-	4228	7.37572	8.4146	-0.190111	0.55275	0.999568
FBtr0071278	FBgn0011661	-	2401	59.3683	60.8659	-0.0359425	0.91445	0.999568
FBtr0071279	FBgn0026411	-	3081	0.35405	0.299941	0.239276	0.692	0.999568
FBtr0071276	FBgn0011661	-	2236	0.0755001	0.0750073	0.00944924	1	1
FBtr0071277	FBgn0011661	-	2282	3.63411	2.17384	0.741355	0.67935	0.999568
FBtr0071274	FBgn0011661	-	2919	34.7428	35.4614	-0.0295339	0.94385	0.999568
FBtr0071275	FBgn0011661	-	2295	38.2707	42.763	-0.160122	0.7136	0.999568
FBtr0071272	FBgn0011661	-	2027	0.247305	0.501818	-1.02088	0.7341	0.999568
FBtr0071273	FBgn0011661	-	2283	1.87183	1.59975	0.226605	0.92675	0.999568
FBtr0071270	FBgn0011661	-	2462	0.926683	0.853387	0.118877	0.9679	0.999568
FBtr0071271	FBgn0011661	-	2353	0.0528479	0.0443061	0.254342	1	1
FBtr0337048	FBgn0037801	-	3074	9.44016	6.03856	0.644606	1	1
FBtr0337049	FBgn0262617	-	5525	0.465466	0.577935	-0.312231	0.8374	0.999568
FBtr0337046	FBgn0038961	-	1876	0.136836	0.957902	-2.80743	0.36645	0.999568
FBtr0337047	FBgn0038956	-	1471	0.0993222	0.0896088	0.148476	1	1
FBtr0337044	FBgn0038965	-	1716	30.8242	30.0971	0.0344395	0.8974	0.999568
FBtr0337045	FBgn0038967	-	3080	0.0694009	0.0632716	0.133397	1	1
FBtr0337042	FBgn0038491	-	1855	0.723819	0.383064	0.918041	0.59925	0.999568
FBtr0337043	FBgn0038488	-	3789	3.49353	3.56168	-0.0278731	0.95035	0.999568
FBtr0337040	FBgn0039368	-	881	0.00737195	0.00388158	0.925401	1	1
FBtr0337041	FBgn0053170	-	357	181.864	169.835	0.098731	1	1
FBtr0343812	FBgn0001992	-	2787	0	0	0	1	1
FBtr0343813	FBgn0266204	-	653	0.340978	0.309361	0.14039	1	1
FBtr0343810	FBgn0263078	-	1469	0.000109352	0.000230247	-1.07421	1	1
FBtr0343811	FBgn0262355	-	604	0.0850695	0.153136	-0.848103	1	1
FBtr0343816	FBgn0266207	-	823	0.16821	0.125005	0.428274	1	1
FBtr0343817	FBgn0261804	-	6913	0.260731	0.207746	0.327743	1	1
FBtr0343814	FBgn0001994	-	4402	4.96081	3.24891	0.61062	0.23815	0.999568
FBtr0343818	FBgn0266206	-	1226	0.237157	0.30751	-0.374791	1	1
FBtr0343819	FBgn0051788	-	425	0	0	0	1	1
TCONS_00287344	XLOC_074883	-	220	1.01133	1.34581	-0.412213	1	1
TCONS_00287345	XLOC_074884	-	200	0.787182	2.83038	-1.84623	1	1
FBtr0300259	FBgn0000659	-	4030	1.33039e-05	0	inf	1	1
FBtr0300255	FBgn0025628	-	2521	0.850516	0.408034	1.05965	0.7044	0.999568
FBtr0300254	FBgn0025628	-	2317	6.14349	5.38077	0.191245	0.81305	0.999568
FBtr0300257	FBgn0037773	-	713	2.59336	2.76537	-0.0926462	0.92565	0.999568
FBtr0300256	FBgn0014006	-	4596	36.8373	38.8533	-0.0768682	0.68365	0.999568
FBtr0075310	FBgn0052163	-	855	5.32286	5.36667	-0.0118242	0.9768	0.999568
FBtr0075313	FBgn0042177	-	3691	39.0616	43.5521	-0.156993	0.51565	0.999568
FBtr0075312	FBgn0042178	-	3649	1.38451	1.97729	-0.514149	0.22605	0.999568
FBtr0331228	FBgn0031664	-	2075	0.113496	0.106144	0.0966278	1	1
TCONS_00468255	XLOC_085839	-	4186	0.461887	0.396407	0.220559	0.75535	0.999568
FBtr0075314	FBgn0025558	-	465	35.3452	32.4449	0.123523	0.6654	0.999568
FBtr0075317	FBgn0036654	-	1393	0.0265257	0.0264348	0.00495129	1	1
TCONS_00793708	XLOC_156372	-	209	0	1.74122	#NAME?	0.2378	0.999568
FBtr0331224	FBgn0015623	-	2679	0.139246	0.0556314	1.32367	1	1
FBtr0331225	FBgn0031800	-	1774	0.858028	0.367583	1.22296	0.20395	0.999568
FBtr0331226	FBgn0031799	-	4546	1.35149	0.897882	0.589949	0.49555	0.999568
FBtr0073658	FBgn0030403	-	2509	30.0195	30.2046	-0.00886615	0.9641	0.999568
FBtr0073659	FBgn0041203	-	4964	3.23435	3.47555	-0.103766	0.82715	0.999568
FBtr0073652	FBgn0030396	-	2304	49.3157	44.5466	0.146734	0.445	0.999568
FBtr0073653	FBgn0030398	-	818	0.274922	0.583056	-1.08461	0.60025	0.999568
FBtr0073650	FBgn0030394	-	1326	0.244433	0.223532	0.128955	1	1
FBtr0073651	FBgn0002562	-	2625	0.158771	0.209041	-0.396836	1	1
FBtr0073656	FBgn0030408	-	1544	0.0799856	0.129106	-0.690746	1	1
FBtr0073657	FBgn0030406	-	1526	5.07528	5.06242	0.00365888	0.9946	0.999568
FBtr0073655	FBgn0030407	-	2123	6.26558	5.95543	0.0732421	0.77725	0.999568
FBtr0333745	FBgn0261802	-	6913	0.360068	0.218939	0.717741	0.82715	0.999568
FBtr0333744	FBgn0261802	-	5823	0.669078	0.541944	0.304032	0.8899	0.999568
FBtr0333746	FBgn0013323	-	673	0	0.0020012	#NAME?	1	1
FBtr0333740	FBgn0040031	-	1252	0.0962708	0.15033	-0.642965	1	1
FBtr0333743	FBgn0261802	-	9304	0.127278	0.119285	0.0935698	1	1
FBtr0333742	FBgn0261802	-	6550	0.0498151	0.159637	-1.68014	1	1
FBtr0345973	FBgn0267017	-	541	0.203842	0.317836	-0.640832	1	1
FBtr0345972	FBgn0267016	-	210	0	0	0	1	1
FBtr0345970	FBgn0267015	-	306	0.306819	0.275892	0.153284	1	1
FBtr0333749	FBgn0015558	-	3757	0.232063	0.25279	-0.123418	1	1
FBtr0333748	FBgn0016041	-	2395	19.0612	17.6956	0.107245	0.78815	0.999568
FBtr0345975	FBgn0267019	-	270	1.11221	0.19471	2.51402	1	1
FBtr0345974	FBgn0267018	-	303	0	0	0	1	1
FBtr0336715	FBgn0053547	-	6268	0	0	0	1	1
FBtr0336714	FBgn0053547	-	10187	0.335389	0.309922	0.113932	1	1
FBtr0336717	FBgn0053547	-	10892	0.0949119	0.0664708	0.513869	1	1
FBtr0336716	FBgn0053547	-	6964	0.000201171	0	inf	1	1
FBtr0336711	FBgn0259736	-	5439	0.137615	0.714107	-2.3755	0.2869	0.999568
FBtr0336710	FBgn0037837	-	2089	0.0589233	0	inf	1	1
FBtr0336713	FBgn0053547	-	7864	0	0	0	1	1
FBtr0113186	FBgn0037182	-	2580	16.3625	23.6416	-0.530941	0.13495	0.999568
FBtr0336719	FBgn0053547	-	10519	0.0143436	0	inf	1	1
FBtr0336718	FBgn0053547	-	8629	0	0	0	1	1
FBtr0330177	FBgn0000565	-	980	53.042	37.8093	0.488395	0.1269	0.999568
FBtr0330723	FBgn0260486	-	8434	3.15543	3.39643	-0.106187	0.77405	0.999568
FBtr0330176	FBgn0000565	-	1056	26.2657	31.9973	-0.284769	0.45295	0.999568
FBtr0333811	FBgn0261793	-	6934	8.55967	10.5012	-0.29492	0.4662	0.999568
FBtr0330175	FBgn0037182	-	2298	0.132913	0.450258	-1.76027	0.62275	0.999568
FBtr0333810	FBgn0264712	-	4339	0.0913115	0.0750752	0.282461	1	1
FBtr0113180	FBgn0036880	-	1516	0.0677643	0.160031	-1.23975	1	1
FBtr0333813	FBgn0060296	-	2369	0.517138	0.195099	1.40634	0.22255	0.999568
FBtr0111094	FBgn0033159	-	7747	0.0299812	0	inf	1	1
FBtr0333815	FBgn0085434	-	12573	0.164265	0.260668	-0.666189	1	1
FBtr0111092	FBgn0033159	-	7690	0.0178687	0.00908916	0.975212	1	1
FBtr0333817	FBgn0085434	-	11475	0.0199842	0.0738383	-1.88551	1	1
FBtr0333816	FBgn0085434	-	12475	0.215943	0.24199	-0.164297	1	1
FBtr0081099	FBgn0032705	-	2276	57.7722	64.5553	-0.160159	0.4281	0.999568
FBtr0081098	FBgn0032703	-	843	49.6079	48.6518	0.0280744	0.89835	0.999568
FBtr0333818	FBgn0028476	-	4844	1.05104	1.53134	-0.54298	0.6088	0.999568
FBtr0081091	FBgn0261597	-	1112	5.83505	5.88034	-0.011154	1	1
FBtr0081090	FBgn0261597	-	692	31.0987	28.0102	0.150906	0.93245	0.999568
FBtr0081093	FBgn0086909	-	1842	4.7996	5.63755	-0.232153	0.78035	0.999568
FBtr0081092	FBgn0086909	-	1971	22.0112	16.6307	0.404384	0.3224	0.999568
FBtr0081095	FBgn0032698	-	1216	43.2629	49.3021	-0.18852	0.54165	0.999568
FBtr0081097	FBgn0032701	-	1873	30.3095	26.3402	0.202505	0.4645	0.999568
FBtr0081096	FBgn0032700	-	2351	24.3741	26.2777	-0.108492	1	1
FBtr0112858	FBgn0010348	-	1493	0.114045	0.0537105	1.08633	1	1
FBtr0074389	FBgn0030824	-	814	0.564975	0.483284	0.225314	0.71495	0.999568
FBtr0074388	FBgn0000163	-	11772	26.8211	26.2827	0.0292498	0.8787	0.999568
FBtr0080514	FBgn0023407	-	5743	0	0.206463	#NAME?	1	1
FBtr0111099	FBgn0033159	-	7756	0	0	0	1	1
FBtr0074381	FBgn0030813	-	2013	34.0056	34.5317	-0.0221511	0.90875	0.999568
FBtr0074383	FBgn0030816	-	2433	21.0107	18.1766	0.209037	0.72705	0.999568
FBtr0074382	FBgn0030814	-	1838	0.0845053	0.134981	-0.675648	1	1
FBtr0074385	FBgn0030817	-	1920	140.491	168.892	-0.265624	0.27355	0.999568
FBtr0074384	FBgn0030817	-	2087	33.017	43.7147	-0.40491	0.4096	0.999568
FBtr0074387	FBgn0260747	-	997	65.0173	58.5983	0.149965	0.4821	0.999568
FBtr0074386	FBgn0260748	-	5088	12.4962	16.4154	-0.393561	0.15055	0.999568
FBtr0339958	FBgn0033886	-	1495	0.453738	0.4367	0.0552165	0.95635	0.999568
FBtr0339959	FBgn0033901	-	1570	23.1385	23.9533	-0.0499296	0.86675	0.999568
FBtr0339956	FBgn0002643	-	7884	1.11058	1.29182	-0.218097	0.6887	0.999568
TCONS_00974745	XLOC_209779	-	203	1.53038	0.640791	1.25597	1	1
FBtr0339957	FBgn0033889	-	5083	18.9377	19.4204	-0.0363091	1	1
FBtr0339954	FBgn0033883	-	1244	50.3019	45.942	0.1308	1	1
FBtr0113007	FBgn0031145	-	1607	3.35474	3.33167	0.00995323	0.9922	0.999568
FBtr0113004	FBgn0030976	-	2020	11.8442	9.54204	0.311813	0.2536	0.999568
FBtr0339955	FBgn0013770	-	1662	0.316549	0.297239	0.0908044	1	1
FBtr0113003	FBgn0030954	-	2230	0.283825	0.256956	0.143478	1	1
FBtr0113000	FBgn0030925	-	2408	1.20756	2.00312	-0.73015	0.19715	0.999568
FBtr0334718	FBgn0038826	-	3397	0	0	0	1	1
FBtr0334717	FBgn0038826	-	2862	0	0	0	1	1
FBtr0334716	FBgn0038826	-	4732	0	0	0	1	1
FBtr0334715	FBgn0038826	-	3407	0	0	0	1	1
FBtr0334714	FBgn0038826	-	2837	0	0	0	1	1
FBtr0334713	FBgn0038826	-	7374	0.157467	0.0424813	1.89015	1	1
FBtr0334712	FBgn0038826	-	2610	3.28327	3.09127	0.0869338	0.9339	0.999568
FBtr0113008	FBgn0031209	-	2629	0.651224	0.662757	-0.0253251	0.9536	0.999568
FBtr0113009	FBgn0031245	-	1455	1.30243	0.86629	0.588287	0.61775	0.999568
FBtr0080519	FBgn0032524	-	1335	24.3395	25.3108	-0.0564524	0.8258	0.999568
FBtr0339951	FBgn0033872	-	1108	0.149124	0	inf	1	1
FBtr0075162	FBgn0036759	-	1021	23.0193	16.9716	0.439718	1	1
FBtr0075163	FBgn0052189	-	430	0.147343	0.0670793	1.13524	1	1
FBtr0075160	FBgn0036761	-	1763	19.78	20.1566	-0.0272037	1	1
FBtr0075161	FBgn0036760	-	1288	98.607	95.4945	0.0462733	0.8287	0.999568
FBtr0075167	FBgn0036756	-	1553	17.0616	10.0729	0.760272	0.01305	0.645783
FBtr0075164	FBgn0052188	-	349	0	0.305242	#NAME?	1	1
FBtr0075169	FBgn0052187	-	1326	1.92485	1.35589	0.505503	0.22075	0.999568
FBtr0339087	FBgn0265178	-	2010	3.03674	4.43997	-0.548028	0.58275	0.999568
FBtr0088526	FBgn0025286	-	522	11.3537	7.85969	0.530619	0.88015	0.999568
FBtr0088527	FBgn0025286	-	577	7.65599	9.39676	-0.295575	0.91035	0.999568
FBtr0088524	FBgn0033428	-	1299	86.9094	83.4678	0.0582929	0.7677	0.999568
FBtr0088525	FBgn0025286	-	509	2866.73	2418.1	0.245532	0.3784	0.999568
FBtr0088522	FBgn0033426	-	1929	15.0703	13.2092	0.190173	0.84045	0.999568
FBtr0088523	FBgn0033426	-	1880	1.83577	1.82693	0.00696611	0.9943	0.999568
FBtr0088520	FBgn0033423	-	1686	28.083	21.6382	0.376114	0.087	0.999568
FBtr0088521	FBgn0033426	-	1673	0	0	0	1	1
FBtr0080052	FBgn0053303	-	1516	101.693	103.303	-0.0226638	1	1
FBtr0331596	FBgn0015774	-	6391	0.0960636	2.61641e-05	11.8422	1	1
FBtr0080050	FBgn0262782	-	1159	312.351	302.7	0.0452768	1	1
FBtr0080051	FBgn0004106	-	1082	193.564	209.79	-0.116134	0.53605	0.999568
FBtr0080054	FBgn0027568	-	4070	28.7371	28.9718	-0.0117377	1	1
FBtr0080055	FBgn0032228	-	1405	9.47304	7.55772	0.325877	0.24225	0.999568
FBtr0080059	FBgn0011703	-	2577	159.123	183.489	-0.205553	0.27385	0.999568
FBtr0331594	FBgn0030349	-	4771	0.267051	0.324362	-0.28049	1	1
FBtr0112755	FBgn0085478	-	2342	0.123691	0.313423	-1.34136	1	1
FBtr0112754	FBgn0085478	-	4189	1.77042	1.95999	-0.146757	0.80785	0.999568
FBtr0112757	FBgn0085480	-	945	6.95473e-05	4.35946e-06	3.99577	1	1
FBtr0112756	FBgn0085479	-	1472	0.247892	0.471498	-0.927543	0.74665	0.999568
FBtr0112751	FBgn0085476	-	1472	0.136768	7.21508e-06	14.2104	1	1
FBtr0112750	FBgn0085475	-	350	6.41663	3.50663	0.871731	0.0915	0.999568
FBtr0112753	FBgn0085478	-	6294	0	0	0	1	1
FBtr0112752	FBgn0085477	-	1052	0.104811	0.110517	-0.0764884	1	1
FBtr0331590	FBgn0030351	-	716	0.227912	0.15885	0.520817	1	1
FBtr0331591	FBgn0030349	-	4492	0.514043	0.304945	0.753339	0.5585	0.999568
TCONS_00001721	XLOC_000873	-	582	0.0462581	0.405917	-3.13341	1	1
TCONS_00683554	XLOC_150236	-	208	0	0	0	1	1
FBtr0089433	FBgn0005278	-	2353	0	0	0	1	1
FBtr0089432	FBgn0005278	-	2283	151.754	145.294	0.0627602	0.8321	0.999568
FBtr0089431	FBgn0005278	-	2380	0.00304909	0.0124273	-2.02707	1	1
FBtr0089430	FBgn0005278	-	2380	75.2052	74.3413	0.0166675	0.96665	0.999568
FBtr0089437	FBgn0005278	-	2387	0.38852	0.323327	0.264997	0.7405	0.999568
FBtr0089436	FBgn0005278	-	1971	0.314418	0.104124	1.59438	1	1
FBtr0089435	FBgn0005278	-	2309	56.0354	49.5478	0.177518	0.7199	0.999568
FBtr0089434	FBgn0005278	-	2429	19.3158	18.3475	0.0741968	0.9278	0.999568
FBtr0083651	FBgn0004652	-	3402	0.521265	0.716486	-0.458921	0.49245	0.999568
FBtr0088383	FBgn0000715	-	1427	1.44162	0.885691	0.702816	0.10605	0.999568
FBtr0088380	FBgn0050008	-	965	137.492	79.8539	0.783913	0.0225	0.887364
FBtr0088381	FBgn0050007	-	5297	5.85607	6.7164	-0.197756	0.53185	0.999568
FBtr0083655	FBgn0038617	-	2167	14.7529	16.0029	-0.117336	0.59855	0.999568
FBtr0088387	FBgn0027619	-	1363	0	0.118116	#NAME?	1	1
FBtr0088384	FBgn0033465	-	2300	61.1786	57.2771	0.0950688	0.66535	0.999568
FBtr0088385	FBgn0033466	-	2621	6.21175	8.3708	-0.430367	0.44845	0.999568
FBtr0083658	FBgn0038613	-	2728	12.7462	9.49132	0.425384	0.0588	0.999568
FBtr0088388	FBgn0033471	-	1526	36.1668	35.63	0.0215727	0.9186	0.999568
FBtr0088389	FBgn0033471	-	1581	0.655726	0.963977	-0.555906	0.73535	0.999568
FBtr0087721	FBgn0033828	-	592	0	0.119018	#NAME?	1	1
FBtr0087720	FBgn0033830	-	1458	0.748439	0.525614	0.509881	0.3122	0.999568
FBtr0087722	FBgn0033792	-	2932	0.032478	4.34856e-05	9.54471	1	1
FBtr0333623	FBgn0264604	-	668	0.0736235	0.0990885	-0.428551	1	1
FBtr0087729	FBgn0086532	-	1799	0.376338	0.405753	-0.108573	0.9618	0.999568
FBtr0087728	FBgn0020391	-	3235	1.05064	0.775911	0.437299	0.8834	0.999568
FBtr0333106	FBgn0260442	-	9409	0.96053	0.663513	0.533706	0.75205	0.999568
FBtr0333105	FBgn0260442	-	9937	0.630897	0.44502	0.503533	0.778	0.999568
FBtr0346590	FBgn0051781	-	2557	0	0.00995429	#NAME?	1	1
FBtr0309054	FBgn0004244	-	3821	0.0865474	0.0362265	1.25644	1	1
FBtr0309055	FBgn0010388	-	754	0.175032	0.0397733	2.13775	1	1
FBtr0346593	FBgn0025712	-	1292	0.137594	0.358044	-1.37972	1	1
FBtr0333101	FBgn0004435	-	1813	1.80907	3.97685	-1.13638	0.4781	0.999568
FBtr0071368	FBgn0264691	-	1760	53.9074	51.7603	0.0586353	0.81915	0.999568
FBtr0333100	FBgn0027356	-	2497	5.33169	3.17956	0.745764	0.29855	0.999568
FBtr0346595	FBgn0267314	-	604	0.131355	0	inf	1	1
FBtr0346596	FBgn0267315	-	579	0.134522	0.0818119	0.717461	1	1
FBtr0346597	FBgn0264513	-	1122	0.0240423	0.0508548	-1.08081	1	1
FBtr0290228	FBgn0036767	-	698	13.6014	15.1224	-0.152932	0.6085	0.999568
FBtr0290229	FBgn0032299	-	442	3.42605	0.762752	2.16726	0.00885	0.51123
FBtr0290227	FBgn0030289	-	3430	8.24088	9.17745	-0.155294	0.7809	0.999568
FBtr0290224	FBgn0035480	-	579	5.52654	3.3955	0.702749	1	1
FBtr0290225	FBgn0035548	-	686	0.0310081	0.0249849	0.31159	1	1
FBtr0290222	FBgn0037244	-	1178	77.9906	83.6683	-0.10138	0.69115	0.999568
FBtr0290223	FBgn0035797	-	2586	0.161782	0.324514	-1.00422	1	1
FBtr0290220	FBgn0035159	-	972	0.272601	0.455109	-0.739421	0.7419	0.999568
FBtr0290221	FBgn0036690	-	867	81.0093	87.7025	-0.11453	0.7206	0.999568
TCONS_00663367	XLOC_169913	-	801	0.434518	0.466727	-0.103162	0.95195	0.999568
TCONS_00965671	XLOC_195065	-	212	1.21328	0	inf	1	1
TCONS_00965672	XLOC_195066	-	208	0.632226	0.595092	0.0873269	1	1
FBtr0082520	FBgn0037955	-	1665	5.21039	3.45187	0.594014	0.40595	0.999568
FBtr0082521	FBgn0037955	-	1638	1.89355	2.16774	-0.195099	0.8732	0.999568
FBtr0082522	FBgn0037955	-	1430	3.42547	2.72559	0.329735	0.7462	0.999568
FBtr0082526	FBgn0051116	-	4353	0.280681	0.225496	0.315826	1	1
FBtr0082527	FBgn0051116	-	3972	2.00744	1.32613	0.598136	0.3016	0.999568
FBtr0082528	FBgn0051116	-	3994	0.228811	0.175301	0.384321	1	1
FBtr0082529	FBgn0025802	-	6782	0.264956	0.138736	0.933415	1	1
FBtr0086450	FBgn0260934	-	4827	15.4473	18.5238	-0.262029	0.56975	0.999568
FBtr0310479	FBgn0263765	-	655	0.0367357	0.205188	-2.48169	1	1
FBtr0086457	FBgn0260934	-	4868	2.0649	1.29652	0.671429	0.6699	0.999568
FBtr0310470	FBgn0261861	-	496	0.0353128	7.5285e-06	12.1955	1	1
FBtr0310471	FBgn0261860	-	392	0	0	0	1	1
FBtr0310472	FBgn0261860	-	484	0	0	0	1	1
FBtr0310473	FBgn0038946	-	1103	0.134592	0.196869	-0.548642	1	1
FBtr0310475	FBgn0031191	-	2292	0.913755	0.881446	0.0519351	0.983	0.999568
FBtr0310476	FBgn0013799	-	2042	0.191443	0.146576	0.38527	1	1
FBtr0310477	FBgn0036911	-	1330	0.695711	0.996838	-0.518872	0.70895	0.999568
FBtr0072242	FBgn0010278	-	2507	74.2221	84.7924	-0.192085	0.3089	0.999568
FBtr0072241	FBgn0028411	-	527	108.84	114.176	-0.0690506	0.81825	0.999568
FBtr0072246	FBgn0034973	-	500	0.113825	0.102765	0.147466	1	1
FBtr0072247	FBgn0034974	-	2800	1.6806e-05	0.00325006	-7.59535	1	1
FBtr0072245	FBgn0034904	-	614	0.702282	0.97544	-0.474002	0.86235	0.999568
FBtr0072248	FBgn0034974	-	2815	0.0409531	0.000447327	6.5165	1	1
FBtr0072249	FBgn0086129	-	3936	28.6372	32.9654	-0.203061	0.3061	0.999568
FBtr0086182	FBgn0022960	-	3470	2.85548	2.64901	0.108284	0.8797	0.999568
FBtr0086183	FBgn0022960	-	3467	30.3389	35.0152	-0.20681	0.2984	0.999568
FBtr0086180	FBgn0029506	-	1394	204.375	156.755	0.382706	0.04215	0.999568
FBtr0086181	FBgn0029507	-	886	44.1374	34.0372	0.374893	1	1
FBtr0086186	FBgn0050157	-	1034	0.339252	0.148915	1.18787	1	1
FBtr0086184	FBgn0050156	-	1425	0.0466144	0.143386	-1.62106	1	1
FBtr0086185	FBgn0033121	-	1911	32.6517	35.3027	-0.112618	1	1
TCONS_00364439	XLOC_056155	-	970	1.82053	1.2795	0.508779	0.4137	0.999568
TCONS_00473323	XLOC_095955	-	208	0	1.19018	#NAME?	1	1
TCONS_00958455	XLOC_220979	-	1251	0.340243	0.487478	-0.518772	0.7897	0.999568
TCONS_00251198	XLOC_079790	-	218	0.497765	0	inf	1	1
FBtr0302637	FBgn0259243	-	1648	1.19416	1.1159	0.0977919	0.9548	0.999568
FBtr0302639	FBgn0259243	-	3245	3.51042	2.05592	0.771863	0.3301	0.999568
FBtr0302638	FBgn0259243	-	2426	2.84239	2.81471	0.0141165	0.9879	0.999568
FBtr0084968	FBgn0039404	-	657	48.5617	47.569	0.0297968	0.91475	0.999568
FBtr0084969	FBgn0039407	-	1069	5.92834	8.436	-0.508931	0.1988	0.999568
FBtr0084962	FBgn0001139	-	2969	38.2925	47.0876	-0.298288	0.2515	0.999568
FBtr0084963	FBgn0001139	-	2988	2.71006	3.58667	-0.404322	0.68305	0.999568
FBtr0084960	FBgn0002633	-	982	0.375019	0.402259	-0.101162	1	1
FBtr0084961	FBgn0000591	-	769	0.0607287	0.16468	-1.43921	1	1
FBtr0084966	FBgn0001139	-	3002	1.08981	0.547673	0.992689	0.66905	0.999568
FBtr0084967	FBgn0039402	-	1248	53.4687	49.9362	0.0986082	0.62825	0.999568
FBtr0084964	FBgn0001139	-	2908	0	0	0	1	1
FBtr0084965	FBgn0001139	-	2887	0.126899	0.216424	-0.770185	1	1
Novel000150.1	Novel000150	-	991	0.258607	0.450797	-0.801715	0.3578	0.999568
FBtr0307373	FBgn0263132	-	8588	0.0672795	0.0747194	-0.151317	1	1
FBtr0307372	FBgn0263132	-	7541	0.0159478	0.0823473	-2.36836	1	1
FBtr0307371	FBgn0263132	-	5317	3.06992e-05	0	inf	1	1
FBtr0307370	FBgn0263132	-	4678	0.131889	0.0724217	0.864832	1	1
FBtr0307377	FBgn0035888	-	2734	0.79361	0.354721	1.16175	0.5335	0.999568
FBtr0307376	FBgn0035888	-	2641	3.1699	3.283	-0.0505769	0.9455	0.999568
FBtr0307375	FBgn0263132	-	11742	0.000201402	6.06987e-05	1.73034	1	1
FBtr0307374	FBgn0263132	-	14423	0.00624625	0.0105981	-0.762745	1	1
FBtr0307379	FBgn0039904	-	5372	8.90208	9.68011	-0.120882	0.81175	0.999568
FBtr0307378	FBgn0035888	-	2779	0.911405	0.366074	1.31596	0.4636	0.999568
TCONS_00012211	XLOC_012280	-	1047	0.210595	0.258421	-0.29525	1	1
FBtr0079261	FBgn0027496	-	1105	69.7739	63.0166	0.146955	0.5124	0.999568
FBtr0079260	FBgn0031820	-	5718	4.96714	4.83157	0.0399238	0.9198	0.999568
FBtr0079263	FBgn0031824	-	1441	28.1597	28.7859	-0.0317283	0.91855	0.999568
FBtr0079262	FBgn0051638	-	3212	1.58219	0.870832	0.861458	0.3796	0.999568
FBtr0079265	FBgn0031821	-	1002	0.433989	0	inf	1	1
FBtr0079264	FBgn0031822	-	483	73.9852	72.2388	0.0344624	0.9314	0.999568
FBtr0079267	FBgn0031818	-	1944	26.5424	29.3314	-0.14415	0.51175	0.999568
FBtr0079266	FBgn0086357	-	2019	182.046	161.703	0.170957	1	1
FBtr0079269	FBgn0259749	-	1921	9.43729	8.99293	0.0695813	0.91555	0.999568
FBtr0080934	FBgn0261068	-	705	31.5466	32.8136	-0.0568067	0.88115	0.999568
FBtr0080937	FBgn0032595	-	529	46.2343	40.6036	0.187356	0.76565	0.999568
FBtr0080936	FBgn0032596	-	774	207.141	203.006	0.0290883	1	1
FBtr0080931	FBgn0032609	-	1624	0.0125934	0.0440109	-1.8052	1	1
FBtr0080930	FBgn0022213	-	3237	126.361	145.821	-0.206648	0.3236	0.999568
FBtr0080933	FBgn0032602	-	1487	0.0953377	0.102565	-0.105415	1	1
FBtr0080932	FBgn0000406	-	1465	236.063	202.172	0.223586	1	1
FBtr0303278	FBgn0261803	-	1407	0.0793031	0.0593467	0.418208	1	1
FBtr0303279	FBgn0261803	-	1412	0.150649	0.0772176	0.96419	1	1
FBtr0303276	FBgn0261802	-	4308	0.457663	0.690004	-0.592317	0.8379	0.999568
FBtr0303277	FBgn0261802	-	10534	0	0	0	1	1
FBtr0303274	FBgn0261802	-	3774	1.66191	1.40883	0.238341	0.88725	0.999568
FBtr0303275	FBgn0261802	-	4450	0.160815	0.112324	0.51774	1	1
FBtr0303272	FBgn0261802	-	6348	9.62527	9.53378	0.0137797	0.9768	0.999568
FBtr0303273	FBgn0261802	-	6732	1.20319	1.04567	0.202431	0.88145	0.999568
FBtr0303270	FBgn0261801	-	2857	2.57048	2.25193	0.190878	0.53005	0.999568
FBtr0303271	FBgn0261802	-	6880	4.55555	4.35599	0.0646228	0.92355	0.999568
FBtr0084038	FBgn0003257	-	2039	34.8828	36.0417	-0.0471508	0.8925	0.999568
FBtr0084039	FBgn0025865	-	2416	23.5539	24.7526	-0.0716153	0.7455	0.999568
FBtr0084030	FBgn0038859	-	591	0.173104	0.119924	0.529522	1	1
FBtr0084032	FBgn0267841	-	3492	48.8028	47.9446	0.0255951	0.92645	0.999568
FBtr0084033	FBgn0038857	-	1000	52.128	50.8938	0.0345671	0.90655	0.999568
FBtr0084034	FBgn0266674	-	2799	31.6004	33.9635	-0.10404	0.6833	0.999568
FBtr0084035	FBgn0038854	-	3171	24.1809	24.3232	-0.00846247	0.9662	0.999568
FBtr0084036	FBgn0038853	-	5353	13.891	16.9526	-0.287354	0.1401	0.999568
FBtr0084037	FBgn0038852	-	1267	0.114529	0.162541	-0.505093	1	1
FBtr0075501	FBgn0260635	-	1820	0	0	0	1	1
FBtr0304134	FBgn0032252	-	2131	0.914227	0.761822	0.263097	0.64415	0.999568
FBtr0304137	FBgn0032259	-	1553	15.2888	16.661	-0.123998	1	1
FBtr0304133	FBgn0032256	-	2001	9.56353	10.4968	-0.134336	0.656	0.999568
FBtr0304138	FBgn0086347	-	3882	0.360392	0.0801447	2.16889	0.44355	0.999568
FBtr0304139	FBgn0262148	-	1374	0.353506	0.322148	0.134014	0.845	0.999568
TCONS_00539486	XLOC_105747	-	206	2.03812	1.18357	0.784097	1	1
FBtr0344070	FBgn0031040	-	559	70.4603	60.3737	0.22289	1	1
TCONS_00950446	XLOC_207433	-	249	0	0.256337	#NAME?	1	1
FBtr0331295	FBgn0032987	-	662	19.5608	16.8002	0.219487	0.9526	0.999568
FBtr0300724	FBgn0036218	-	1898	0.0597615	4.84638e-05	10.2681	1	1
FBtr0300727	FBgn0265574	-	3219	19.6416	21.966	-0.16136	1	1
FBtr0300721	FBgn0036218	-	1901	4.18433e-05	3.21844e-05	0.378637	1	1
FBtr0300722	FBgn0036218	-	1847	0.0434517	0.0570433	-0.392646	1	1
FBtr0300728	FBgn0039349	-	1847	3.38448	3.11535	0.119541	0.87865	0.999568
FBtr0305269	FBgn0085329	-	635	0.00575582	0.00578952	-0.00842221	1	1
FBtr0305268	FBgn0040206	-	1988	72.1175	77.2708	-0.0995742	1	1
FBtr0305263	FBgn0043841	-	953	0.359393	0	inf	1	1
FBtr0305262	FBgn0020309	-	6150	0.326416	0.541769	-0.730965	0.6245	0.999568
FBtr0305261	FBgn0032362	-	2954	0.220628	0.258574	-0.228966	1	1
FBtr0305260	FBgn0004363	-	1525	45.6493	47.1787	-0.0475418	0.95005	0.999568
FBtr0305265	FBgn0032405	-	1386	0.0501382	0.0899952	-0.843938	1	1
FBtr0114628	FBgn0034180	-	3829	8.47057	8.59038	-0.0202634	0.94865	0.999568
FBtr0114623	FBgn0000578	-	4107	0.211033	0.200434	0.0743383	1	1
FBtr0114622	FBgn0265356	-	5170	2.33613	1.46873	0.66955	0.21585	0.999568
FBtr0114627	FBgn0034180	-	4361	1.92727	1.47155	0.389219	0.54605	0.999568
FBtr0083358	FBgn0022344	-	938	73.5954	67.4661	0.125452	0.54425	0.999568
FBtr0344579	FBgn0262098	-	783	0.177868	0.0535939	1.73067	1	1
TCONS_00639369	XLOC_134692	-	263	0.496242	0.431662	0.201142	1	1
FBtr0083350	FBgn0003944	-	2784	0.448948	0.483303	-0.106378	0.9072	0.999568
FBtr0083351	FBgn0003944	-	3117	1.8729	1.38781	0.432466	0.36585	0.999568
FBtr0083352	FBgn0003944	-	4180	3.46281e-05	0.000161871	-2.22482	1	1
FBtr0083353	FBgn0051217	-	2289	12.0605	10.8377	0.154236	0.5045	0.999568
FBtr0083354	FBgn0038455	-	1103	29.249	26.9176	0.119837	0.6039	0.999568
FBtr0344575	FBgn0262814	-	477	0.000310179	0	inf	1	1
FBtr0083356	FBgn0038454	-	1811	13.6762	16.304	-0.253552	0.528	0.999568
FBtr0083357	FBgn0038452	-	1660	0.107028	0.119026	-0.153287	1	1
FBtr0111053	FBgn0033159	-	7699	0	0.0375913	#NAME?	1	1
FBtr0111052	FBgn0033159	-	7702	2.1278e-05	0.0115249	-9.08118	1	1
FBtr0111051	FBgn0033159	-	7744	0.00969541	0.0235593	-1.28092	1	1
FBtr0111050	FBgn0033159	-	7744	0.0141872	0.0370331	-1.38422	1	1
FBtr0111057	FBgn0033159	-	7702	0.0236257	0.0171626	0.461091	1	1
FBtr0111056	FBgn0033159	-	7699	0.0237558	0.020231	0.231716	1	1
FBtr0111055	FBgn0033159	-	7747	0	0.00965914	#NAME?	1	1
FBtr0111054	FBgn0033159	-	7744	8.96403e-05	0.0208401	-7.861	1	1
FBtr0111059	FBgn0033159	-	7747	0	0	0	1	1
FBtr0111058	FBgn0033159	-	7741	0	0.0124084	#NAME?	1	1
FBtr0345752	FBgn0032068	-	3074	1.75245	0.00813068	7.75178	0.3052	0.999568
TCONS_00076397	XLOC_040096	-	1999	0.57098	0.516928	0.143477	0.75685	0.999568
FBtr0306769	FBgn0033159	-	7755	0	0	0	1	1
FBtr0306768	FBgn0033159	-	7710	3.10899e-05	0.0364113	-10.1937	1	1
FBtr0306767	FBgn0033159	-	7764	0.0598482	0	inf	1	1
FBtr0301633	FBgn0264493	-	2311	86.1221	100.239	-0.218985	0.6149	0.999568
FBtr0077206	FBgn0003423	-	3778	0	0	0	1	1
TCONS_00693994	XLOC_164933	-	208	1.30221	0	inf	1	1
FBtr0075360	FBgn0002284	-	944	288.702	284.427	0.021522	0.9067	0.999568
FBtr0075361	FBgn0036648	-	1154	25.5751	24.2336	0.0777304	0.89555	0.999568
FBtr0075363	FBgn0027500	-	3686	63.9289	79.5958	-0.316222	0.0911	0.999568
FBtr0075364	FBgn0003741	-	687	6.40501	7.43438	-0.215012	0.83635	0.999568
FBtr0075365	FBgn0036643	-	897	40.3321	36.9051	0.128109	0.8375	0.999568
FBtr0075366	FBgn0036601	-	544	0.147908	0.36045	-1.2851	1	1
FBtr0331274	FBgn0264262	-	1047	0.10423	0.148218	-0.507953	1	1
FBtr0075369	FBgn0042201	-	538	11.5751	6.14092	0.9145	0.01745	0.763907
FBtr0331279	FBgn0264260	-	411	0.155367	0.0729115	1.09146	1	1
TCONS_00943984	XLOC_196331	-	1115	0.545415	0.479749	0.185073	0.8997	0.999568
TCONS_01061984	XLOC_216065	-	219	0	2.22397	#NAME?	0.1852	0.999568
FBtr0071845	FBgn0034724	-	1116	53.7779	38.0946	0.497426	1	1
FBtr0071847	FBgn0034720	-	4656	0.000125022	0.000274763	-1.13601	1	1
FBtr0071846	FBgn0034720	-	4703	0.1869	0.381316	-1.02872	0.41125	0.999568
FBtr0071841	FBgn0034729	-	1190	22.6446	23.0068	-0.0228942	0.92715	0.999568
FBtr0071840	FBgn0034729	-	1132	4.16076	4.43968	-0.093611	0.8778	0.999568
FBtr0071843	FBgn0022986	-	1592	2.85832	4.1706	-0.545087	0.3822	0.999568
FBtr0071842	FBgn0034727	-	1440	46.6062	46.631	-0.000769539	0.99795	0.999568
FBtr0071849	FBgn0034718	-	3087	10.9287	8.85924	0.302871	0.1821	0.999568
FBtr0071848	FBgn0017482	-	1959	12.2072	10.1116	0.271718	0.73415	0.999568
FBtr0332896	FBgn0028342	-	978	43.1073	35.1791	0.293215	1	1
FBtr0332897	FBgn0040941	-	494	5.09616e-06	0	inf	1	1
FBtr0332894	FBgn0029895	-	4754	2.10674	2.06886	0.0261764	0.95305	0.999568
FBtr0332895	FBgn0030181	-	1095	1.08075	1.19027	-0.139252	0.9441	0.999568
FBtr0332892	FBgn0029895	-	4433	0	0.0622984	#NAME?	1	1
FBtr0332893	FBgn0029895	-	4612	2.78776	2.53942	0.134609	0.7326	0.999568
FBtr0332890	FBgn0031053	-	2801	1.3731	1.04385	0.395519	0.3398	0.999568
FBtr0075417	FBgn0036623	-	1605	50.5561	47.5058	0.0897794	0.67195	0.999568
FBtr0331503	FBgn0264308	-	6433	0.846774	0.699025	0.276632	0.4481	0.999568
FBtr0332898	FBgn0030183	-	2606	0	0	0	1	1
FBtr0332899	FBgn0030183	-	2877	10.1081	10.5924	-0.0675101	0.8496	0.999568
FBtr0078678	FBgn0037372	-	1335	45.191	47.0386	-0.0578092	0.7739	0.999568
FBtr0070466	FBgn0003371	-	2847	0.654128	0.927973	-0.504509	0.7993	0.999568
FBtr0070467	FBgn0003371	-	2929	6.83857	7.84727	-0.198496	0.7214	0.999568
FBtr0070460	FBgn0001150	-	1780	0.209227	0.250052	-0.257159	1	1
FBtr0070461	FBgn0052797	-	931	0.235667	0.321369	-0.447484	1	1
FBtr0070462	FBgn0040385	-	1537	0.128705	0.129378	-0.00752159	1	1
FBtr0078670	FBgn0037376	-	1592	126.44	130.673	-0.0475042	0.8024	0.999568
FBtr0078672	FBgn0027608	-	2281	0	0	0	1	1
FBtr0070468	FBgn0003371	-	3055	22.8498	26.4335	-0.210184	0.47155	0.999568
FBtr0070469	FBgn0003371	-	4244	2.71551	2.02975	0.419921	0.6136	0.999568
FBtr0078677	FBgn0266672	-	3363	33.0623	34.8148	-0.074514	0.78355	0.999568
FBtr0075413	FBgn0014163	-	3283	0.0774604	0.0337304	1.19941	1	1
FBtr0085749	FBgn0062411	-	1031	0.041757	0.0757528	-0.859282	1	1
FBtr0075410	FBgn0027080	-	1771	61.6539	60.3543	0.0307358	0.87235	0.999568
FBtr0071599	FBgn0034618	-	4906	11.6441	12.2908	-0.0779703	0.8428	0.999568
FBtr0085748	FBgn0051008	-	529	0.0535444	0.0465924	0.200642	1	1
FBtr0075411	FBgn0036629	-	1700	7.04668	7.35449	-0.0616807	0.9247	0.999568
FBtr0071593	FBgn0016726	-	389	289.47	248.564	0.219798	0.74025	0.999568
FBtr0071592	FBgn0016726	-	329	4266.45	3432.81	0.313645	0.1298	0.999568
FBtr0071591	FBgn0034611	-	2563	1.47688	1.55771	-0.0768726	0.94155	0.999568
FBtr0071590	FBgn0034611	-	2399	3.36612	3.52049	-0.0646882	0.9293	0.999568
FBtr0346323	FBgn0051235	-	2494	0.058954	0.102905	-0.803657	1	1
FBtr0346322	FBgn0262794	-	593	0	0	0	1	1
FBtr0346321	FBgn0037672	-	1428	0.449878	0.627319	-0.479664	0.38935	0.999568
FBtr0346320	FBgn0267188	-	205	0	0	0	1	1
FBtr0346327	FBgn0267193	-	300	0.313665	0.290815	0.109123	1	1
FBtr0346326	FBgn0267192	-	395	0.429346	0.465789	-0.117535	1	1
FBtr0346325	FBgn0267191	-	673	12.9253	14.9346	-0.208464	1	1
FBtr0346324	FBgn0267190	-	467	0.0618612	0.290184	-2.22986	1	1
FBtr0346329	FBgn0267195	-	601	0.514164	0.38593	0.41389	0.6169	0.999568
FBtr0346328	FBgn0267194	-	211	0	0.522363	#NAME?	1	1
TCONS_00986570	XLOC_191850	-	205	1.3684	1.2879	0.0874633	1	1
FBtr0081842	FBgn0037581	-	1524	0.000142403	0.477318	-11.7108	0.0314	0.999568
FBtr0304855	FBgn0262526	-	3337	1.37608	1.69101	-0.297327	0.8475	0.999568
FBtr0304854	FBgn0262526	-	2241	77.0682	92.9063	-0.26964	0.2553	0.999568
FBtr0304853	FBgn0013733	-	17148	1.47741	1.65482	-0.163606	1	1
FBtr0304852	FBgn0013733	-	17813	0.201066	0.17504	0.199983	1	1
FBtr0304851	FBgn0013733	-	13661	4.43368	4.38066	0.017355	0.98035	0.999568
FBtr0304850	FBgn0013733	-	17845	0.409744	0.197084	1.05591	0.6954	0.999568
FBtr0081840	FBgn0037580	-	2398	109.673	121.017	-0.142001	0.5223	0.999568
FBtr0304859	FBgn0262475	-	3802	0.278403	0.304877	-0.131053	1	1
FBtr0304858	FBgn0262475	-	3987	0.0819066	0.253675	-1.63093	1	1
FBtr0078712	FBgn0037359	-	1080	17.6883	18.217	-0.0424957	0.95745	0.999568
FBtr0084835	FBgn0039335	-	2091	16.7268	17.7252	-0.0836368	0.75255	0.999568
FBtr0081844	FBgn0020249	-	1380	54.9478	55.1792	-0.00606515	0.98635	0.999568
FBtr0081845	FBgn0020249	-	1388	7.1147	6.42756	0.146531	1	1
FBtr0344335	FBgn0260634	-	8889	4.29224	5.13077	-0.257443	0.60795	0.999568
FBtr0084839	FBgn0039336	-	1280	23.9966	23.2361	0.0464622	0.8804	0.999568
FBtr0076108	FBgn0015828	-	1622	69.1616	78.2983	-0.179009	0.3506	0.999568
FBtr0071339	FBgn0030101	-	1277	7.74737	9.51212	-0.29606	0.5673	0.999568
FBtr0302092	FBgn0261261	-	5372	1.17003	0.000916877	10.3175	0.38165	0.999568
FBtr0344330	FBgn0033863	-	2193	0.118885	0.0787601	0.594029	1	1
FBtr0071333	FBgn0052704	-	2811	0.106599	0.114929	-0.108555	1	1
FBtr0076100	FBgn0036176	-	285	0.566675	0.661318	-0.222824	1	1
FBtr0071331	FBgn0000077	-	1422	3.87189	3.85008	0.00814716	0.99415	0.999568
FBtr0076102	FBgn0036184	-	1275	39.9521	41.1398	-0.0422637	0.8419	0.999568
FBtr0076105	FBgn0042138	-	1181	0.12866	0.480943	-1.9023	0.6234	0.999568
FBtr0076104	FBgn0042138	-	1237	2.50224	2.57633	-0.0420975	0.9701	0.999568
FBtr0076107	FBgn0036188	-	967	32.6706	32.0399	0.0281235	1	1
FBtr0076106	FBgn0052091	-	2967	9.68418	8.79043	0.139696	0.5418	0.999568
FBtr0330634	FBgn0033639	-	3693	0.695553	0.178926	1.9588	0.3579	0.999568
FBtr0079109	FBgn0031724	-	1804	0.152735	0.147711	0.0482589	1	1
FBtr0330636	FBgn0031217	-	1221	4.21944	3.78394	0.157163	0.9019	0.999568
FBtr0330637	FBgn0002931	-	1662	0.419715	1.18309	-1.49507	1	1
FBtr0330630	FBgn0020279	-	5116	0.281136	0.330417	-0.233019	1	1
FBtr0330631	FBgn0020279	-	4835	1.54801	0.898869	0.784232	0.63175	0.999568
FBtr0330632	FBgn0033639	-	2885	3.02064	2.68912	0.167724	0.83405	0.999568
FBtr0334992	FBgn0011571	-	1631	2.4257	0.841806	1.52684	0.36865	0.999568
FBtr0079100	FBgn0002525	-	3129	50.607	58.205	-0.201808	1	1
FBtr0079101	FBgn0031717	-	1216	0.00349816	0.00349814	7.97311e-06	1	1
FBtr0079102	FBgn0031717	-	1529	0.0549595	0.314872	-2.51833	1	1
FBtr0079103	FBgn0031719	-	919	0.0701796	0.306398	-2.12628	1	1
FBtr0079104	FBgn0031721	-	1179	0.177467	0.145123	0.290278	1	1
FBtr0330639	FBgn0031228	-	586	8.69811	8.06241	0.109489	0.96955	0.999568
FBtr0079106	FBgn0004620	-	3253	1.9308	1.61718	0.255716	0.4369	0.999568
FBtr0331329	FBgn0041180	-	4700	1.97044	1.71487	0.200424	0.82815	0.999568
FBtr0077854	FBgn0031389	-	964	8.27607	5.96948	0.47134	1	1
FBtr0077850	FBgn0000097	-	4879	2.3273	2.49033	-0.097678	0.82605	0.999568
FBtr0077851	FBgn0000097	-	4266	0.078911	0.0160258	2.29983	1	1
FBtr0077852	FBgn0031391	-	1707	28.3314	30.72	-0.116779	1	1
FBtr0077853	FBgn0031390	-	5401	14.2066	15.126	-0.090469	0.781	0.999568
FBtr0347493	FBgn0027497	-	3777	0.329915	0.0577811	2.51342	1	1
FBtr0347490	FBgn0267929	-	588	0.260323	0	inf	1	1
FBtr0347496	FBgn0267730	-	2039	0.187762	0.111821	0.747716	1	1
FBtr0347497	FBgn0010812	-	3987	0.25645	0.295898	-0.206423	1	1
FBtr0347494	FBgn0036825	-	1139	2.06565	2.22798	-0.109138	0.91275	0.999568
FBtr0347495	FBgn0264513	-	3947	0.0829694	0.0787127	0.0759814	1	1
TCONS_00498996	XLOC_103359	-	227	0.850685	0	inf	1	1
FBtr0340642	FBgn0265708	-	663	3.23353e-06	1.37935e-06	1.22912	1	1
FBtr0340643	FBgn0265708	-	763	0.0315814	0.0558408	-0.822245	1	1
FBtr0340640	FBgn0265707	-	394	0.173626	0.0790602	1.13496	1	1
FBtr0340641	FBgn0265710	-	1641	0.164459	0.159949	0.0401178	1	1
FBtr0340646	FBgn0265712	-	368	0.193301	0	inf	1	1
FBtr0340644	FBgn0265709	-	390	0.177136	0.400067	-1.17539	1	1
FBtr0340645	FBgn0265711	-	495	0.175268	0.0517947	1.75869	1	1
FBtr0340648	FBgn0265715	-	392	0.0903018	0.474334	-2.39308	1	1
FBtr0340649	FBgn0265716	-	378	0.188567	0.595777	-1.65969	1	1
FBtr0345067	FBgn0261872	-	2998	1.63009	1.26519	0.365597	0.6692	0.999568
TCONS_00035907	XLOC_009834	-	214	0	0.513474	#NAME?	0.24665	0.999568
FBtr0345060	FBgn0041780	-	1519	0.0671437	0.155282	-1.20957	1	1
FBtr0345063	FBgn0266692	-	467	0.185584	0.208185	-0.165797	1	1
FBtr0290024	FBgn0036173	-	890	7.63439	6.92485	0.140731	0.87655	0.999568
FBtr0290025	FBgn0035793	-	4841	0	0	0	1	1
FBtr0290026	FBgn0035793	-	5282	0.800505	1.36534	-0.770282	0.47485	0.999568
FBtr0345062	FBgn0266692	-	583	0	0.0562344	#NAME?	1	1
FBtr0290021	FBgn0030575	-	1780	1.00662	0.853346	0.238312	0.78085	0.999568
FBtr0290022	FBgn0262514	-	672	0.294179	0.363565	-0.30552	0.88935	0.999568
FBtr0290023	FBgn0038603	-	3611	0	5.26919e-05	#NAME?	1	1
FBtr0347146	FBgn0036461	-	2391	6.58073	5.52173	0.253129	0.6723	0.999568
FBtr0347147	FBgn0260744	-	3673	18.3112	18.9808	-0.0518176	0.88865	0.999568
FBtr0347140	FBgn0267668	-	3432	0.855292	0.537	0.671495	1	1
FBtr0347148	FBgn0027083	-	4314	0.284182	0.241095	0.237213	1	1
FBtr0347149	FBgn0038063	-	6672	1.25614	1.25961	-0.0039759	0.9917	0.999568
TCONS_00657729	XLOC_161541	-	205	0	0.607437	#NAME?	1	1
FBtr0332261	FBgn0263197	-	6150	1.49456	1.47044	0.0234743	0.9747	0.999568
FBtr0299542	FBgn0036656	-	599	2.54965	0.774165	1.71959	1	1
FBtr0299543	FBgn0030559	-	1367	1.49238	0.794979	0.908624	0.5473	0.999568
FBtr0299544	FBgn0085399	-	4377	0.189045	0.000136575	10.4348	1	1
FBtr0299546	FBgn0265296	-	3476	0.0682048	0.0784432	-0.201775	1	1
FBtr0299547	FBgn0265296	-	3631	0.0851626	0.0775944	0.134269	1	1
FBtr0299548	FBgn0265296	-	6195	0.0134901	0.000148371	6.50655	1	1
FBtr0299549	FBgn0265296	-	8863	0	0	0	1	1
FBtr0332263	FBgn0263197	-	5742	0.647224	0.417627	0.63205	0.66935	0.999568
FBtr0345068	FBgn0085446	-	17173	0.127213	0.413347	-1.70011	0.10635	0.999568
FBtr0077279	FBgn0003300	-	2474	0.0558725	0.0597867	-0.0976864	1	1
FBtr0332262	FBgn0263197	-	6168	0	0.203257	#NAME?	1	1
FBtr0077271	FBgn0031141	-	893	28.9696	18.6687	0.633919	0.01295	0.642778
FBtr0077272	FBgn0011834	-	901	91.3521	59.7582	0.612302	0.0027	0.231618
FBtr0077273	FBgn0031139	-	2498	0.191403	0.12739	0.587365	1	1
FBtr0077274	FBgn0031139	-	2531	0.18507	0.146401	0.33815	1	1
FBtr0077275	FBgn0031139	-	2416	0.14053	0.184116	-0.389736	1	1
FBtr0077276	FBgn0031126	-	2993	28.0731	32.3939	-0.206536	0.4596	0.999568
FBtr0077277	FBgn0031127	-	663	0.144373	1.5663e-05	13.1702	1	1
FBtr0332267	FBgn0013467	-	2713	0	0.0780494	#NAME?	1	1
TCONS_00210313	XLOC_054199	-	366	1.39888	1.73245	-0.308534	0.89695	0.999568
TCONS_00210311	XLOC_054197	-	245	2.46546	2.48346	-0.0104898	0.9028	0.999568
FBtr0332266	FBgn0263197	-	6177	3.58054	5.55411	-0.633378	0.1852	0.999568
FBtr0343336	FBgn0034971	-	1985	0.359565	0.0811615	2.14738	0.645	0.999568
FBtr0343334	FBgn0025806	-	574	0	0	0	1	1
FBtr0072738	FBgn0041342	-	2486	29.7096	24.7648	0.262638	1	1
FBtr0072739	FBgn0041342	-	2529	1.24051	1.57173	-0.341424	0.7453	0.999568
FBtr0072732	FBgn0052318	-	785	11.8424	14.6498	-0.306922	0.3005	0.999568
FBtr0072733	FBgn0004378	-	3871	33.3128	42.1328	-0.338868	0.0801	0.999568
FBtr0072730	FBgn0010333	-	1718	4.17862	2.28351	0.871774	1	1
FBtr0072731	FBgn0035194	-	692	49.7733	52.0378	-0.0641855	0.7816	0.999568
FBtr0072736	FBgn0035229	-	5382	0.82145	0.819456	0.00350628	0.99765	0.999568
FBtr0072737	FBgn0035229	-	5610	3.2408	3.5084	-0.114466	0.816	0.999568
FBtr0072734	FBgn0035193	-	1187	0.902416	0.844693	0.0953651	0.96905	0.999568
FBtr0072735	FBgn0035229	-	5390	14.8546	17.3353	-0.222805	0.30905	0.999568
FBtr0074779	FBgn0031026	-	711	0.16781	0.183067	-0.125541	1	1
FBtr0074774	FBgn0031030	-	2099	58.0885	71.6122	-0.301951	1	1
FBtr0074775	FBgn0026430	-	3313	0.110693	0.10024	0.143108	1	1
FBtr0074776	FBgn0026430	-	3253	1.2328	1.28669	-0.0617165	0.97295	0.999568
FBtr0074777	FBgn0026430	-	3154	62.1799	71.1628	-0.194674	1	1
FBtr0332463	FBgn0003382	-	5871	0.0954997	0.112259	-0.233264	1	1
FBtr0074771	FBgn0031030	-	4035	40.4206	51.0688	-0.33735	1	1
FBtr0074772	FBgn0031030	-	3685	1.53684	1.51243	0.023094	0.99055	0.999568
FBtr0074773	FBgn0031030	-	2238	5.20969	5.30213	-0.0253732	0.98465	0.999568
FBtr0074198	FBgn0030685	-	4304	3.47798	2.7549	0.336248	0.6596	0.999568
FBtr0339738	FBgn0033783	-	2695	27.6955	29.6786	-0.0997732	1	1
FBtr0087902	FBgn0033716	-	1257	35.6418	31.9092	0.159595	0.44625	0.999568
FBtr0087905	FBgn0050047	-	2809	1.6775	1.09519	0.615127	0.0876	0.999568
FBtr0087904	FBgn0266111	-	6284	30.127	34.8881	-0.211679	0.26305	0.999568
FBtr0087907	FBgn0050043	-	3082	0.527005	0.252059	1.06406	0.0262	0.959943
FBtr0087906	FBgn0050049	-	2796	2.14104	1.63083	0.392707	0.23745	0.999568
FBtr0074190	FBgn0025809	-	1507	23.7259	25.2594	-0.0903584	0.70185	0.999568
FBtr0074191	FBgn0025809	-	1435	6.857	7.30923	-0.0921406	0.8409	0.999568
FBtr0074192	FBgn0030691	-	2559	0.185609	0.254324	-0.454399	1	1
FBtr0074193	FBgn0030688	-	902	74.9227	46.8053	0.67873	0.05765	0.999568
FBtr0074194	FBgn0030685	-	4077	2.0213	1.48223	0.447508	0.67935	0.999568
FBtr0339737	FBgn0265427	-	629	0.284229	0.289317	-0.0255971	1	1
FBtr0332285	FBgn0029666	-	4744	3.4843	3.48669	-0.000989313	0.9977	0.999568
FBtr0074197	FBgn0030685	-	4362	1.50274	1.20727	0.315851	0.78275	0.999568
FBtr0336904	FBgn0085443	-	6738	0.113144	0.182474	-0.689531	1	1
FBtr0336905	FBgn0030164	-	1241	1.28994	0.817129	0.658668	0.47585	0.999568
FBtr0336906	FBgn0030164	-	1227	0.161507	0	inf	1	1
FBtr0336907	FBgn0030163	-	1176	0.25362	0.509337	-1.00595	0.5821	0.999568
FBtr0336901	FBgn0052687	-	2803	0.349833	0.59928	-0.776562	0.64495	0.999568
FBtr0336902	FBgn0085443	-	3089	0.395442	0.207348	0.931408	0.72275	0.999568
FBtr0336903	FBgn0085443	-	2896	0.107188	0	inf	1	1
Novel000094.1	Novel000094	-	1102	3.10823	3.54997	-0.191713	0.87385	0.999568
FBtr0336908	FBgn0260991	-	2459	47.2228	58.6313	-0.312186	1	1
FBtr0336909	FBgn0033160	-	2610	45.3426	46.9752	-0.0510346	1	1
FBtr0075823	FBgn0036369	-	1070	3.64123	2.15222	0.758598	0.188	0.999568
FBtr0075822	FBgn0036369	-	1569	0.525252	0.482586	0.122225	0.91525	0.999568
FBtr0075821	FBgn0036369	-	1518	2.69351e-05	0	inf	1	1
FBtr0075820	FBgn0036369	-	2045	0.00306771	0.000367939	3.05962	1	1
FBtr0075825	FBgn0036366	-	1097	33.9514	35.7195	-0.0732375	0.80655	0.999568
FBtr0075824	FBgn0036367	-	918	31.6455	18.9152	0.742454	0.0323	0.999568
TCONS_00465445	XLOC_124275	-	203	0	0	0	1	1
FBtr0080485	FBgn0032484	-	2497	0.859122	0.448226	0.938638	0.5715	0.999568
FBtr0080484	FBgn0032485	-	3184	26.2098	30.3011	-0.209263	0.2863	0.999568
FBtr0080487	FBgn0032483	-	1042	2.13124	2.00928	0.0850108	0.9724	0.999568
FBtr0080481	FBgn0032493	-	863	0.131305	0.0475126	1.46654	1	1
FBtr0080480	FBgn0051730	-	680	0.248184	0.258214	-0.0571596	1	1
FBtr0080483	FBgn0032487	-	911	37.1832	36.8617	0.0125315	0.965	0.999568
FBtr0080482	FBgn0032489	-	656	0.450958	0.47774	-0.083234	1	1
FBtr0080489	FBgn0032479	-	4365	61.7013	66.9572	-0.117938	0.56345	0.999568
FBtr0080488	FBgn0032481	-	5882	8.06174	10.0385	-0.316377	0.3695	0.999568
FBtr0346676	FBgn0052823	-	2200	0.2695	0.386686	-0.520878	1	1
FBtr0081688	FBgn0000552	-	652	0.187112	0.240699	-0.363326	1	1
FBtr0081689	FBgn0004777	-	1097	0.15597	0.0876263	0.831834	1	1
FBtr0081681	FBgn0037462	-	921	0	0.0650451	#NAME?	1	1
FBtr0081682	FBgn0051286	-	1834	0.0633768	0.0870072	-0.45718	1	1
FBtr0081684	FBgn0010355	-	6552	10.3979	10.016	0.0539816	0.87755	0.999568
FBtr0081685	FBgn0010355	-	6744	2.60013	0.244534	3.41048	0.20045	0.999568
FBtr0081686	FBgn0010355	-	6651	0.939192	3.11286	-1.72875	0.256	0.999568
FBtr0081687	FBgn0262801	-	855	89.527	87.9927	0.0249379	0.91315	0.999568
TCONS_00730507	XLOC_176743	-	209	1.88575	0	inf	1	1
FBtr0089086	FBgn0025936	-	5630	0.52667	0.436701	0.270253	0.9048	0.999568
FBtr0089084	FBgn0025936	-	4190	0	0	0	1	1
FBtr0089085	FBgn0025936	-	3691	40.8785	42.9888	-0.0726178	0.78475	0.999568
FBtr0089082	FBgn0025936	-	4142	29.7252	29.6513	0.003592	1	1
FBtr0089083	FBgn0025936	-	4068	9.10063	6.93015	0.393079	0.5123	0.999568
FBtr0089080	FBgn0039911	-	2374	2.00211	1.14422	0.80715	0.0982	0.999568
FBtr0081532	FBgn0051544	-	792	0.115091	0.184592	-0.681565	1	1
FBtr0081534	FBgn0037503	-	1230	0.149415	0.122098	0.291279	1	1
FBtr0081538	FBgn0003885	-	1980	49.1687	49.6742	-0.0147556	0.93985	0.999568
FBtr0334508	FBgn0004573	-	4486	0.196478	0.121717	0.690835	1	1
FBtr0334509	FBgn0038100	-	1045	37.6382	42.324	-0.169279	0.681	0.999568
FBtr0334506	FBgn0051109	-	978	4.37913	3.39078	0.369027	0.599	0.999568
FBtr0334507	FBgn0039261	-	2862	38.1384	43.6707	-0.195421	0.3821	0.999568
FBtr0334504	FBgn0039266	-	1721	2.96229	1.7854	0.730468	0.5296	0.999568
FBtr0334505	FBgn0266719	-	3671	1.42687	1.0544	0.436423	0.6314	0.999568
FBtr0334502	FBgn0039065	-	1491	2.69	0.96885	1.47326	0.46555	0.999568
FBtr0334503	FBgn0039265	-	1040	0.768068	0.212361	1.85471	0.6456	0.999568
FBtr0334500	FBgn0039065	-	1500	8.13378	9.87929	-0.280482	1	1
FBtr0334501	FBgn0039065	-	1497	16.6247	17.8179	-0.0999958	0.8246	0.999568
FBtr0084339	FBgn0051281	-	1491	0.01305	0.0546658	-2.06658	1	1
FBtr0084338	FBgn0039030	-	1112	24.9171	16.9953	0.551999	0.03135	0.999568
FBtr0084337	FBgn0017590	-	4052	0.814237	0.595535	0.451263	0.521	0.999568
FBtr0084336	FBgn0046114	-	1211	166.873	156.464	0.0929237	1	1
FBtr0084334	FBgn0039003	-	2671	13.1242	14.1501	-0.108593	0.65225	0.999568
FBtr0084333	FBgn0039007	-	1249	0.226949	0.209007	0.118815	1	1
FBtr0084330	FBgn0039010	-	2919	0.231184	0.168611	0.455349	1	1
FBtr0076844	FBgn0011640	-	1758	0.553287	0.775558	-0.487206	0.8901	0.999568
FBtr0076845	FBgn0011640	-	2087	1.89618	1.34902	0.491185	0.79715	0.999568
FBtr0076846	FBgn0019662	-	1934	1.14626	1.88867	-0.720441	0.72685	0.999568
FBtr0076847	FBgn0035771	-	2944	86.0299	87.3121	-0.0213433	0.90795	0.999568
FBtr0076841	FBgn0011640	-	1837	19.9093	22.5706	-0.181	0.72455	0.999568
FBtr0076842	FBgn0011640	-	1650	28.956	30.9146	-0.0944232	0.8381	0.999568
FBtr0076843	FBgn0011640	-	1784	1.76214	2.01631	-0.194389	0.9246	0.999568
FBtr0076848	FBgn0082598	-	1268	116.038	130.262	-0.16682	1	1
FBtr0076849	FBgn0082598	-	2080	44.224	42.3464	0.0625925	0.8572	0.999568
Novel000191.1	Novel000191	-	218	0.52819	0	inf	1	1
FBtr0084481	FBgn0039094	-	1330	21.5866	19.5639	0.141943	0.53855	0.999568
FBtr0084480	FBgn0051145	-	2595	0.279893	0.0520398	2.42719	1	1
FBtr0084486	FBgn0039091	-	2212	34.7919	24.6497	0.49718	0.0164	0.736798
FBtr0334959	FBgn0038243	-	703	41.5603	32.2721	0.364918	1	1
FBtr0334958	FBgn0264903	-	281	0.378119	0.344628	0.133799	1	1
Novel000185.1	Novel000185	-	211	1.2431	0	inf	1	1
TCONS_00749962	XLOC_163217	-	215	1.69562	0	inf	1	1
FBtr0330670	FBgn0014010	-	1775	0.121145	0	inf	1	1
FBtr0083599	FBgn0038596	-	494	0.981609	0.523146	0.907933	0.5531	0.999568
FBtr0083596	FBgn0010877	-	2634	0	0	0	1	1
FBtr0083597	FBgn0038598	-	2040	0.529604	0.523079	0.0178855	0.9904	0.999568
FBtr0083594	FBgn0038601	-	1414	54.4309	48.0918	0.178634	0.3651	0.999568
FBtr0083595	FBgn0010877	-	3277	26.8048	31.4478	-0.230469	0.2313	0.999568
FBtr0083592	FBgn0038603	-	3662	0.372644	0.424283	-0.18723	0.896	0.999568
FBtr0083593	FBgn0038602	-	615	0.168145	0.0748566	1.16751	1	1
FBtr0083591	FBgn0038603	-	3643	0	0	0	1	1
FBtr0076146	FBgn0003292	-	3268	15.337	18.6381	-0.281242	0.16695	0.999568
FBtr0087686	FBgn0033853	-	2260	25.0476	19.9495	0.328321	0.39645	0.999568
FBtr0087687	FBgn0033853	-	1826	7.97252	3.2364	1.30065	0.19515	0.999568
FBtr0087684	FBgn0053156	-	1824	35.6861	41.8411	-0.229558	0.48255	0.999568
FBtr0087685	FBgn0033853	-	2213	18.799	19.8898	-0.0813794	0.84215	0.999568
FBtr0087682	FBgn0053156	-	1874	6.10729	7.7726	-0.347866	0.6563	0.999568
FBtr0087683	FBgn0053156	-	2330	3.84619	4.51914	-0.232619	0.7925	0.999568
FBtr0087681	FBgn0053156	-	2030	3.14293	1.91403	0.715498	0.5799	0.999568
FBtr0334957	FBgn0020299	-	3643	4.14902e-05	0	inf	1	1
FBtr0334956	FBgn0020299	-	4594	0.572438	0.235102	1.28383	0.16365	0.999568
FBtr0339358	FBgn0265309	-	1192	0.157133	0.142672	0.13929	1	1
FBtr0339359	FBgn0005638	-	2581	0.106106	0.000282195	8.5546	1	1
TCONS_00055998	XLOC_040496	-	210	1.20194	0.565699	1.08726	1	1
FBtr0332848	FBgn0052512	-	1412	0.542367	0.490259	0.145726	0.9398	0.999568
FBtr0344467	FBgn0031126	-	2800	10.0433	9.6592	0.0562531	0.91295	0.999568
FBtr0346944	FBgn0267539	-	710	0.135298	0	inf	1	1
FBtr0332841	FBgn0004373	-	6109	4.51904	5.2166	-0.207092	0.69115	0.999568
FBtr0332840	FBgn0052343	-	2131	0.00739507	0	inf	1	1
TCONS_00479739	XLOC_107309	-	360	2.17005	2.0586	0.0760614	0.88045	0.999568
FBtr0308746	FBgn0263322	-	596	0.044653	0.0783732	-0.811603	1	1
FBtr0308745	FBgn0263321	-	591	35.8592	18.1796	0.980026	1	1
FBtr0308744	FBgn0263320	-	508	5.50429e-06	0.0993455	-14.1396	1	1
TCONS_00938549	XLOC_188198	-	203	6.04001	3.71163	0.7025	1	1
TCONS_00938545	XLOC_188187	-	223	5.852	4.52971	0.369512	1	1
FBtr0089908	FBgn0032455	-	1194	79.3033	82.4634	-0.0563734	0.8976	0.999568
FBtr0308748	FBgn0034670	-	790	2.44556	1.56095	0.647746	0.15395	0.999568
FBtr0309298	FBgn0035755	-	2038	0	0.053861	#NAME?	1	1
FBtr0309299	FBgn0035755	-	1773	1.29408	5.49266e-05	14.5241	0.1458	0.999568
FBtr0309294	FBgn0013305	-	1727	0.15416	0	inf	1	1
FBtr0309295	FBgn0013305	-	1634	0	0	0	1	1
TCONS_00041211	XLOC_017662	-	206	1.41138	1.77535	-0.330992	1	1
TCONS_00967478	XLOC_197979	-	200	0	2.22223	#NAME?	1	1
FBtr0086227	FBgn0034529	-	4602	5.22828	6.22986	-0.252863	0.28065	0.999568
FBtr0086226	FBgn0034527	-	1925	3.22751	2.76676	0.222226	0.85625	0.999568
FBtr0086225	FBgn0034527	-	1949	35.1555	37.7443	-0.102507	0.71975	0.999568
FBtr0342597	FBgn0265798	-	1073	0.16645	0.0608408	1.45198	1	1
FBtr0086222	FBgn0267791	-	1342	0.153269	0.331419	-1.11259	1	1
FBtr0086221	FBgn0267791	-	2127	1.45412	1.64953	-0.181915	0.8943	0.999568
FBtr0086220	FBgn0267791	-	2076	57.9716	58.9612	-0.0244197	0.90455	0.999568
Novel000239.1	Novel000239	-	269	0	0.407773	#NAME?	1	1
FBtr0086229	FBgn0034532	-	1917	0.416557	0.496018	-0.251879	0.93115	0.999568
FBtr0081949	FBgn0037613	-	610	21.436	18.2739	0.230249	1	1
FBtr0081948	FBgn0037620	-	1159	17.9416	19.4422	-0.11589	0.69085	0.999568
FBtr0078479	FBgn0004514	-	3682	1.03232	0.342057	1.59358	0.2104	0.999568
FBtr0078478	FBgn0000045	-	1543	42.2272	23.1421	0.867653	0.0002	0.0338077
FBtr0078477	FBgn0037146	-	2868	85.3464	64.2047	0.410651	1	1
FBtr0081942	FBgn0037627	-	1271	3.34178	2.51356	0.410886	0.2703	0.999568
FBtr0078475	FBgn0037144	-	2166	30.3446	32.9046	-0.11685	0.5556	0.999568
FBtr0081940	FBgn0053189	-	677	0.983413	0.979904	0.00515753	0.90805	0.999568
FBtr0081947	FBgn0037621	-	1519	41.3005	42.7152	-0.0485894	0.8076	0.999568
FBtr0081946	FBgn0037623	-	3294	1.27185	2.11018	-0.730434	0.28915	0.999568
FBtr0078471	FBgn0037140	-	2085	8.8683	6.01253	0.560685	0.3479	0.999568
FBtr0081944	FBgn0037623	-	3476	10.9468	10.6734	0.0364873	0.8713	0.999568
TCONS_00038856	XLOC_014367	-	262	0.251334	1.97137	-2.97152	0.4863	0.999568
TCONS_00548007	XLOC_123636	-	223	0.447178	2.04481	-2.19305	0.5662	0.999568
FBtr0303845	FBgn0026059	-	2015	0.353126	0.335137	0.0754328	1	1
FBtr0303844	FBgn0030018	-	4945	17.6532	22.7443	-0.365576	0.1406	0.999568
FBtr0303847	FBgn0002709	-	4420	0.194527	0.100038	0.959422	1	1
FBtr0303846	FBgn0034390	-	1255	15.9274	12.7999	0.315385	0.45215	0.999568
FBtr0303841	FBgn0038069	-	1379	0.134089	0.174206	-0.377609	1	1
FBtr0303840	FBgn0038068	-	1330	0.124921	0.11105	0.169802	1	1
FBtr0303843	FBgn0030018	-	5594	2.34228	2.42739	-0.0514918	0.942	0.999568
FBtr0303842	FBgn0030018	-	5165	0.635031	1.37643	-1.11603	0.3623	0.999568
FBtr0303849	FBgn0039140	-	2712	6.5308	4.50454	0.535881	0.4664	0.999568
FBtr0303848	FBgn0028581	-	5005	7.96135	10.8222	-0.44291	0.1894	0.999568
TCONS_00997205	XLOC_214230	-	209	1.88575	0	inf	1	1
TCONS_00020903	XLOC_025525	-	215	1.59849	0.475806	1.74826	1	1
TCONS_00419973	XLOC_097475	-	686	2.15428	1.73091	0.315678	0.5054	0.999568
FBtr0303599	FBgn0025702	-	3919	0	0	0	1	1
TCONS_00265327	XLOC_067962	-	219	0.973826	2.20121	-1.17656	0.4025	0.999568
TCONS_00362900	XLOC_051270	-	504	2.44736	3.68113	-0.588921	0.86475	0.999568
Novel000137.1	Novel000137	-	205	0	0	0	1	1
TCONS_01018477	XLOC_223902	-	262	67.4934	64.173	0.0727801	0.88085	0.999568
FBtr0306301	FBgn0037556	-	2536	3.27809	4.04979	-0.304994	0.5487	0.999568
FBtr0091719	FBgn0064126	-	1547	0.652294	0.664204	-0.026104	0.98845	0.999568
FBtr0091718	FBgn0053721	-	546	0	0.0450644	#NAME?	1	1
FBtr0091717	FBgn0046874	-	4148	0.68903	0.640887	0.104496	0.95825	0.999568
FBtr0091716	FBgn0046874	-	6324	0.468849	1.01359	-1.11228	0.51105	0.999568
FBtr0091711	FBgn0260458	-	3010	0	0	0	1	1
FBtr0091710	FBgn0260458	-	3563	1.06424	0.692566	0.6198	0.531	0.999568
FBtr0306305	FBgn0262891	-	588	0	0.120233	#NAME?	1	1
FBtr0306304	FBgn0262890	-	1164	5.71995e-05	5.75015e-05	-0.00759922	1	1
FBtr0087352	FBgn0024754	-	1830	8.98363	9.29799	-0.0496195	0.92145	0.999568
FBtr0303339	FBgn0030328	-	2986	0.117313	0.270225	-1.2038	1	1
FBtr0303338	FBgn0030328	-	2784	4.85251	7.75037	-0.675535	0.1449	0.999568
FBtr0303337	FBgn0030328	-	2945	2.43693	2.84921	-0.225497	0.73465	0.999568
FBtr0303336	FBgn0030328	-	2704	2.83366	3.67194	-0.373877	0.56915	0.999568
FBtr0303335	FBgn0030329	-	1740	1.25866	2.13427	-0.761854	0.5274	0.999568
FBtr0303334	FBgn0030329	-	1746	0.861013	0.289862	1.57067	0.54125	0.999568
FBtr0347308	FBgn0267730	-	1214	0.1425	0.139492	0.0307823	1	1
FBtr0347309	FBgn0267731	-	512	0.328657	0.347418	-0.0800868	0.9197	0.999568
FBtr0347302	FBgn0085362	-	1960	0.40594	0.8848	-1.12408	0.55375	0.999568
TCONS_00010013	XLOC_008538	-	220	0.326208	0	inf	1	1
FBtr0347306	FBgn0267751	-	2574	0.778036	0.58563	0.409847	0.42755	0.999568
FBtr0347307	FBgn0267729	-	615	0.760306	0.637107	0.255045	0.9124	0.999568
FBtr0347305	FBgn0267750	-	617	0	0	0	1	1
FBtr0305658	FBgn0039900	-	2596	0.232524	0.130173	0.836947	1	1
FBtr0305656	FBgn0003721	-	1318	2.17155	1.25611	0.789769	0.819	0.999568
FBtr0305657	FBgn0053300	-	5253	0.0931203	0.0846264	0.137989	1	1
FBtr0305654	FBgn0003721	-	1503	0.382338	0.153021	1.32112	0.58845	0.999568
FBtr0305655	FBgn0003721	-	752	1.63018	1.52752	0.0938389	0.92635	0.999568
FBtr0305652	FBgn0003638	-	3609	0.42699	0.171048	1.3198	0.72795	0.999568
FBtr0305653	FBgn0033484	-	3834	0.195288	0.183409	0.09054	1	1
FBtr0305650	FBgn0266569	-	486	30.3489	27.0535	0.165826	1	1
FBtr0305651	FBgn0003638	-	3478	0.0748473	0.305369	-2.02853	1	1
FBtr0300026	FBgn0041232	-	1116	0.152762	0.17165	-0.168186	1	1
FBtr0347108	FBgn0267650	-	2367	0.906445	0.447137	1.0195	0.77725	0.999568
TCONS_00227050	XLOC_079875	-	221	1.48497	0.439099	1.75782	1	1
FBtr0300025	FBgn0051785	-	1487	0.310714	0.232664	0.41734	1	1
FBtr0300020	FBgn0016076	-	3455	13.2513	9.06987	0.546977	1	1
FBtr0300021	FBgn0041103	-	948	0.161526	0.251686	-0.639857	1	1
FBtr0300028	FBgn0085271	-	343	40.4101	29.3992	0.458938	0.1813	0.999568
TCONS_00242858	XLOC_066509	-	972	0.832928	1.07744	-0.371347	0.45515	0.999568
FBtr0347101	FBgn0267645	-	361	0.729465	0.376027	0.956003	1	1
TCONS_00538898	XLOC_104956	-	207	1.33631	1.18764	0.170149	0.64175	0.999568
FBtr0347105	FBgn0028734	-	2896	4.04378	7.48775	-0.888826	0.19565	0.999568
FBtr0078994	FBgn0031657	-	1153	43.4171	39.7291	0.128069	0.7337	0.999568
FBtr0078995	FBgn0031659	-	1986	30.8296	34.9742	-0.181973	0.54485	0.999568
FBtr0078996	FBgn0031660	-	1138	75.1361	69.0015	0.122877	1	1
FBtr0078997	FBgn0031662	-	1194	54.2996	53.1865	0.0298831	0.90335	0.999568
FBtr0078990	FBgn0031650	-	1318	0.296908	0.126875	1.22661	1	1
FBtr0078991	FBgn0015000	-	1784	26.8477	25.5276	0.0727433	0.7875	0.999568
FBtr0078992	FBgn0031655	-	2411	18.2347	19.9654	-0.13082	0.5348	0.999568
FBtr0340332	FBgn0034321	-	711	0.175798	0.243568	-0.470411	1	1
FBtr0340333	FBgn0034325	-	590	0	0.200374	#NAME?	1	1
FBtr0340330	FBgn0265594	-	500	0.172419	0.258187	-0.582496	1	1
FBtr0300519	FBgn0259174	-	4454	4.88827	4.98093	-0.027092	0.9707	0.999568
FBtr0340336	FBgn0265595	-	4261	0.0617521	0.0221371	1.48002	1	1
FBtr0340337	FBgn0265595	-	2831	0	0.146674	#NAME?	1	1
FBtr0340334	FBgn0265593	-	637	0	0.0711596	#NAME?	1	1
FBtr0340335	FBgn0265595	-	4394	0.0162145	0.0811243	-2.32285	1	1
FBtr0300680	FBgn0034645	-	405	157.854	136.674	0.207852	0.56755	0.999568
FBtr0300681	FBgn0039116	-	938	3.11379	3.09557	0.00846652	0.99555	0.999568
FBtr0300687	FBgn0039329	-	3310	0.349642	0.791652	-1.17899	0.2815	0.999568
FBtr0300685	FBgn0037531	-	2985	7.49972	9.26357	-0.304731	1	1
FBtr0300688	FBgn0036052	-	2233	1.50455	1.54428	-0.0375986	0.9604	0.999568
FBtr0300689	FBgn0031208	-	1880	2.6195	2.26731	0.208313	0.5545	0.999568
FBtr0337037	FBgn0038603	-	1537	3.36647	1.90448	0.821837	0.2186	0.999568
FBtr0331965	FBgn0034031	-	821	0.220297	0.330943	-0.587131	1	1
FBtr0331963	FBgn0034031	-	771	1.68639	1.69101	-0.00394648	0.9902	0.999568
FBtr0331962	FBgn0264330	-	238	0	0	0	1	1
FBtr0301375	FBgn0028371	-	1939	0.380181	0.203431	0.902145	0.79255	0.999568
FBtr0301374	FBgn0028371	-	9430	1.25057	1.18232	0.0809633	0.8805	0.999568
FBtr0301377	FBgn0028371	-	5989	0.62431	0.815053	-0.384631	0.6931	0.999568
FBtr0301376	FBgn0028371	-	1845	0.681892	0.41981	0.699806	0.72275	0.999568
FBtr0301371	FBgn0011225	-	4550	0	0	0	1	1
FBtr0301370	FBgn0011225	-	4279	16.2567	13.5262	0.265285	1	1
FBtr0301372	FBgn0033725	-	1733	0.106133	0.0530092	1.00155	1	1
FBtr0331960	FBgn0003091	-	4711	1.63101	1.5559	0.0680114	0.85995	0.999568
FBtr0301379	FBgn0024963	-	1770	0.536203	0	inf	0.12415	0.999568
FBtr0301378	FBgn0024963	-	1650	0.582944	1.06959	-0.875626	0.4449	0.999568
FBtr0306684	FBgn0033766	-	5786	27.1307	29.2718	-0.109586	0.5578	0.999568
FBtr0306685	FBgn0082582	-	2299	2.52681	1.49549	0.756697	0.36295	0.999568
FBtr0306686	FBgn0082582	-	2699	0	0	0	1	1
FBtr0306687	FBgn0082582	-	3484	0.233727	0.121584	0.942872	1	1
FBtr0345216	FBgn0039487	-	2190	0	0	0	1	1
FBtr0306681	FBgn0028935	-	2901	0.108959	0.0702568	0.633073	1	1
FBtr0306682	FBgn0035813	-	4388	0.254213	0.196826	0.369119	1	1
FBtr0306683	FBgn0036380	-	1878	0.125858	0.197305	-0.648631	1	1
FBtr0345218	FBgn0039213	-	2907	8.38877	7.50869	0.159899	1	1
FBtr0345219	FBgn0038294	-	2827	0.522397	0.368149	0.504854	0.8875	0.999568
FBtr0306688	FBgn0033504	-	2384	0.424268	0.129658	1.71026	0.51705	0.999568
FBtr0300974	FBgn0030882	-	1789	0	0	0	1	1
FBtr0300975	FBgn0052495	-	2151	0	0	0	1	1
FBtr0300976	FBgn0052495	-	1337	0	0	0	1	1
FBtr0300977	FBgn0052495	-	1804	0	0	0	1	1
FBtr0300970	FBgn0030882	-	1804	0	0	0	1	1
FBtr0300971	FBgn0030882	-	1337	0	0	0	1	1
FBtr0300972	FBgn0030882	-	2002	0	0	0	1	1
FBtr0300973	FBgn0030882	-	2151	0	0	0	1	1
FBtr0300978	FBgn0052495	-	1938	0	0	0	1	1
FBtr0300979	FBgn0052495	-	2002	0	0	0	1	1
FBtr0301089	FBgn0011476	-	460	49.5154	46.4981	0.0907069	1	1
FBtr0301088	FBgn0039065	-	1671	3.0862	7.20561	-1.22329	0.13625	0.999568
FBtr0301087	FBgn0031296	-	1288	0.817035	0.349788	1.22392	0.6906	0.999568
FBtr0301085	FBgn0039075	-	4648	0.825756	0.735115	0.167747	1	1
FBtr0301084	FBgn0029791	-	3372	0.211118	0.251668	-0.253476	1	1
FBtr0301083	FBgn0029791	-	3920	0.880493	0.771744	0.190189	0.82415	0.999568
FBtr0299586	FBgn0016797	-	4597	1.35838	1.05697	0.36196	0.5753	0.999568
FBtr0301081	FBgn0085417	-	1989	0.264916	0.136603	0.955552	1	1
TCONS_00992663	XLOC_205119	-	578	0.152549	0.356284	-1.22375	1	1
FBtr0299587	FBgn0061200	-	7927	13.1746	16.3214	-0.30901	0.28105	0.999568
FBtr0345357	FBgn0022238	-	958	2.02568	1.13025	0.841765	0.48615	0.999568
FBtr0111152	FBgn0058470	-	2990	3.38185	2.55531	0.404314	0.16585	0.999568
FBtr0299581	FBgn0086899	-	7243	8.29415	9.57824	-0.207667	0.65355	0.999568
TCONS_00955482	XLOC_216228	-	276	2.07277	1.1033	0.909738	0.74305	0.999568
FBtr0299582	FBgn0086899	-	5890	0	0	0	1	1
FBtr0299583	FBgn0086899	-	4673	11.9075	17.8839	-0.586797	0.2023	0.999568
FBtr0333374	FBgn0259173	-	5246	0.120304	0.124736	-0.052196	1	1
FBtr0345356	FBgn0034588	-	2134	4.39539	2.49377	0.81766	1	1
FBtr0333375	FBgn0259173	-	5383	0.248567	0.181307	0.455199	1	1
FBtr0100340	FBgn0004903	-	2828	3.27639	2.9908	0.131575	0.8393	0.999568
FBtr0100342	FBgn0005561	-	4201	0.033439	0	inf	1	1
FBtr0100345	FBgn0005561	-	2257	0	0.131813	#NAME?	1	1
FBtr0100344	FBgn0005561	-	2749	0.860217	0.461778	0.8975	0.66845	0.999568
FBtr0100346	FBgn0005561	-	4501	0.164949	0.205879	-0.319775	1	1
FBtr0111240	FBgn0086683	-	1354	5.94659	6.40187	-0.10643	0.8847	0.999568
FBtr0111241	FBgn0086683	-	1257	1.5475	2.05314	-0.407892	0.82425	0.999568
FBtr0111246	FBgn0041004	-	1501	0.052301	0.177339	-1.7616	1	1
FBtr0111247	FBgn0041004	-	5581	0.639454	0.488684	0.387939	0.782	0.999568
FBtr0111244	FBgn0041004	-	1745	0	0	0	1	1
FBtr0111245	FBgn0041004	-	1624	35.0184	34.7173	0.0124565	0.97235	0.999568
FBtr0111248	FBgn0041004	-	1804	26.9013	29.5968	-0.137764	0.69015	0.999568
FBtr0111249	FBgn0041004	-	4284	1.9113	1.40689	0.442043	0.62225	0.999568
FBtr0332913	FBgn0004607	-	10141	1.94401	1.66008	0.227784	0.661	0.999568
FBtr0332912	FBgn0033212	-	5298	14.4547	17.6246	-0.286055	0.2479	0.999568
FBtr0332911	FBgn0033212	-	6319	2.60874	2.76626	-0.0845817	0.8739	0.999568
FBtr0332910	FBgn0034792	-	2940	3.25459	3.08941	0.0751416	0.91265	0.999568
FBtr0332917	FBgn0004907	-	1760	1.28461	0	inf	0.16905	0.999568
FBtr0332916	FBgn0004907	-	2924	0	0	0	1	1
FBtr0332915	FBgn0011241	-	766	1.51226	1.30483	0.212841	0.939	0.999568
FBtr0332914	FBgn0050010	-	873	10.9687	9.91914	0.145104	0.8667	0.999568
FBtr0332918	FBgn0033904	-	998	15.4203	8.3091	0.892062	1	1
FBtr0345354	FBgn0034543	-	599	22.2003	15.374	0.530083	1	1
FBtr0302859	FBgn0261573	-	2085	19.8683	23.6384	-0.250669	0.51265	0.999568
FBtr0306538	FBgn0067779	-	3454	6.45927	7.81632	-0.275118	0.67975	0.999568
FBtr0306539	FBgn0067779	-	4153	0.496148	0.455974	0.121819	0.9617	0.999568
FBtr0306536	FBgn0067779	-	3731	15.719	16.1006	-0.034609	1	1
FBtr0302854	FBgn0263235	-	886	14.8151	9.70625	0.610085	1	1
FBtr0306534	FBgn0035533	-	3507	0	0.000199795	#NAME?	1	1
FBtr0302856	FBgn0039003	-	2668	3.97486	5.06442	-0.349493	0.4179	0.999568
FBtr0302850	FBgn0027341	-	2628	0	0	0	1	1
FBtr0302853	FBgn0051262	-	2001	27.3811	29.5429	-0.10963	0.5948	0.999568
FBtr0302852	FBgn0051262	-	1988	0	0	0	1	1
TCONS_00977867	XLOC_215104	-	210	0	1.1314	#NAME?	1	1
FBtr0337035	FBgn0051051	-	853	4.29832e-06	4.84472e-06	-0.172639	1	1
FBtr0334076	FBgn0035265	-	2200	0.309148	0.280915	0.138161	1	1
FBtr0334077	FBgn0035264	-	3878	3.56087	2.86972	0.311316	1	1
FBtr0334074	FBgn0035268	-	2525	20.2788	24.1998	-0.255026	1	1
FBtr0334075	FBgn0022702	-	1911	0.72171	0.953621	-0.401998	0.83695	0.999568
FBtr0334072	FBgn0035267	-	5090	0.31166	0.172639	0.852218	1	1
FBtr0334073	FBgn0035268	-	2540	0.756389	0.37972	0.994192	1	1
FBtr0334070	FBgn0036544	-	6737	0.522853	0.592079	-0.179383	0.7397	0.999568
FBtr0334071	FBgn0036544	-	6755	6.32918e-05	0.111689	-10.7852	1	1
FBtr0334078	FBgn0027594	-	3148	1.49761	1.14618	0.385828	0.7794	0.999568
FBtr0334079	FBgn0027594	-	4435	9.60123	12.0176	-0.323859	0.3982	0.999568
FBtr0075669	FBgn0036465	-	940	0.991329	0.211493	2.22875	0.40195	0.999568
FBtr0089861	FBgn0053467	-	561	0.0957313	0.0411795	1.21706	1	1
FBtr0089867	FBgn0035028	-	2360	0.543188	0.598813	-0.140653	0.9406	0.999568
FBtr0089868	FBgn0035028	-	2170	8.69781	8.99799	-0.0489501	0.9091	0.999568
FBtr0089869	FBgn0029854	-	1607	0.811515	0.76026	0.0941265	0.95595	0.999568
FBtr0075663	FBgn0036469	-	489	0.866134	0.693106	0.321514	1	1
FBtr0075665	FBgn0036467	-	544	1.33411	1.34834	-0.0153057	0.98335	0.999568
FBtr0075664	FBgn0036468	-	560	0.712974	0.732258	-0.0385029	0.9644	0.999568
FBtr0075666	FBgn0036466	-	660	0.145373	0.237072	-0.705568	1	1
FBtr0331754	FBgn0052579	-	1317	0.0923571	0.608089	-2.71899	0.4702	0.999568
FBtr0331755	FBgn0052579	-	1009	12.2855	13.1233	-0.0951814	0.8752	0.999568
FBtr0331756	FBgn0030740	-	1726	4.631	4.45654	0.0554005	0.9629	0.999568
FBtr0331757	FBgn0052767	-	6993	2.13686	3.70698	-0.794757	0.2012	0.999568
FBtr0331750	FBgn0052660	-	342	0	0	0	1	1
FBtr0331751	FBgn0003371	-	4750	0.294106	0.187835	0.646867	1	1
FBtr0331752	FBgn0003371	-	4499	0.0290584	0.143254	-2.30154	1	1
FBtr0331753	FBgn0003371	-	5004	0.560263	0.596189	-0.0896641	0.9537	0.999568
FBtr0331758	FBgn0052767	-	11438	0.562534	0.581877	-0.0487727	0.96435	0.999568
FBtr0331759	FBgn0259170	-	3156	4.75324	2.59075	0.875544	0.2154	0.999568
TCONS_00365855	XLOC_062152	-	334	0.0639606	0.0589009	0.118892	1	1
FBtr0346172	FBgn0267096	-	177	0	0	0	1	1
FBtr0346173	FBgn0267097	-	1419	0.142745	0.103446	0.464564	1	1
FBtr0346170	FBgn0052698	-	1775	1.19829	1.1499	0.0594706	0.949	0.999568
FBtr0339392	FBgn0033431	-	1341	18.0931	14.4914	0.320242	0.8744	0.999568
FBtr0346177	FBgn0267101	-	399	0.503232	0.37817	0.412187	1	1
FBtr0346174	FBgn0267098	-	347	0	0	0	1	1
FBtr0346175	FBgn0030078	-	1810	1.22905	0.637483	0.947082	0.38915	0.999568
FBtr0346178	FBgn0267103	-	386	0.63006	0.732597	-0.217531	0.81755	0.999568
FBtr0346179	FBgn0267102	-	527	0	0	0	1	1
FBtr0343522	FBgn0261954	-	7954	3.84591	5.0332	-0.38815	0.65455	0.999568
FBtr0343523	FBgn0000635	-	3475	0	0	0	1	1
FBtr0343520	FBgn0000536	-	4575	0.304949	0	inf	1	1
FBtr0343521	FBgn0027601	-	2780	0	0	0	1	1
FBtr0343526	FBgn0001316	-	5689	0.489252	0.513045	-0.0685056	0.974	0.999568
FBtr0343527	FBgn0001316	-	2708	0.744902	0.562084	0.406265	0.8857	0.999568
FBtr0343524	FBgn0000635	-	3260	0.121242	0.14381	-0.246272	1	1
FBtr0343525	FBgn0027287	-	5007	1.7667	1.47635	0.259021	0.76375	0.999568
FBtr0343528	FBgn0004368	-	6060	1.28629	2.03264	-0.66014	0.36805	0.999568
FBtr0343529	FBgn0004368	-	6059	5.98966	5.8022	0.0458745	0.9078	0.999568
TCONS_00366730	XLOC_065797	-	685	1.35475	1.09249	0.310401	0.9151	0.999568
FBtr0333250	FBgn0031544	-	1832	10.6692	10.9678	-0.0398295	0.93985	0.999568
FBtr0076318	FBgn0036043	-	4515	11.5022	12.0597	-0.0682885	0.8363	0.999568
FBtr0076319	FBgn0036043	-	5759	0.292408	0.0704681	2.05294	1	1
FBtr0330409	FBgn0030761	-	1971	13.9963	13.8556	0.0145817	1	1
FBtr0076310	FBgn0052057	-	3531	0	0	0	1	1
FBtr0076311	FBgn0036072	-	1096	0.0763803	0.12277	-0.684688	1	1
FBtr0330401	FBgn0030613	-	8285	0.543559	0.264794	1.03757	0.1819	0.999568
FBtr0330400	FBgn0030613	-	8459	0.00496131	0.148619	-4.90475	1	1
FBtr0076314	FBgn0052054	-	1775	8.65867	6.1647	0.490114	0.35295	0.999568
FBtr0076315	FBgn0052053	-	1618	3.73853	2.25445	0.729693	0.41915	0.999568
FBtr0076316	FBgn0036066	-	2112	4.97885	3.04337	0.710143	0.2933	0.999568
FBtr0076317	FBgn0036043	-	5319	3.43191	6.40387	-0.899934	0.1237	0.999568
FBtr0344582	FBgn0264482	-	296	0.335654	0.297269	0.175204	1	1
FBtr0088809	FBgn0033271	-	1674	2.53961	1.59329	0.6726	1	1
FBtr0088801	FBgn0033280	-	605	0.0848633	0.0380496	1.15726	1	1
FBtr0088800	FBgn0050376	-	941	0.255225	0.127417	1.00221	1	1
FBtr0088803	FBgn0010109	-	2036	0.0293192	0.0773829	-1.40017	1	1
FBtr0088802	FBgn0033279	-	817	0.108843	0.102211	0.0907083	1	1
FBtr0088805	FBgn0033274	-	739	37.9444	28.9673	0.389464	0.2986	0.999568
FBtr0088804	FBgn0033275	-	819	1.60691	0.176982	3.18261	0.4426	0.999568
FBtr0088807	FBgn0033272	-	1558	23.1071	25.0842	-0.118437	0.5928	0.999568
FBtr0088806	FBgn0050373	-	610	55.4047	51.46	0.106557	1	1
FBtr0073369	FBgn0046793	-	1463	0.206303	0.1748	0.239058	1	1
FBtr0073362	FBgn0035575	-	1958	0.68456	0.467052	0.551592	0.24535	0.999568
FBtr0073363	FBgn0035571	-	1173	4.17064	2.64842	0.655135	0.26505	0.999568
FBtr0073361	FBgn0042131	-	1354	0.58932	0.464716	0.342701	0.5947	0.999568
FBtr0073366	FBgn0035568	-	1142	0.150727	0.133603	0.17399	1	1
FBtr0073367	FBgn0035567	-	1188	0.0874195	0.079056	0.145081	1	1
FBtr0073364	FBgn0035570	-	682	0.288171	0.486769	-0.756314	0.7908	0.999568
FBtr0073365	FBgn0035569	-	641	0.0401725	0.247096	-2.62079	1	1
FBtr0333275	FBgn0051038	-	2015	0.663199	0.549194	0.272125	0.85585	0.999568
FBtr0333274	FBgn0051038	-	2369	0.821169	0.602735	0.446155	0.7241	0.999568
FBtr0333277	FBgn0038256	-	1647	6.00535	5.12603	0.228408	0.77255	0.999568
FBtr0333276	FBgn0266064	-	2473	0.45248	0.779527	-0.784744	0.8039	0.999568
FBtr0333271	FBgn0025525	-	5146	2.75008	1.67383	0.71632	0.0295	0.999568
FBtr0333270	FBgn0004870	-	5337	0.200368	0.190672	0.0715574	1	1
FBtr0333273	FBgn0005564	-	2357	0.0367514	0.127661	-1.79645	1	1
FBtr0333272	FBgn0010417	-	2053	0.162076	0.23518	-0.537093	1	1
FBtr0333279	FBgn0037347	-	1534	0.602359	0.438363	0.458497	0.79335	0.999568
FBtr0333278	FBgn0037347	-	1574	1.45688	1.48546	-0.0280277	0.97705	0.999568
TCONS_00983051	XLOC_223630	-	212	1.78601	0	inf	1	1
FBtr0330331	FBgn0263998	-	4364	0.797588	0.30746	1.37525	0.35625	0.999568
FBtr0273308	FBgn0050263	-	6387	0.0666058	0.0426455	0.643253	1	1
FBtr0273306	FBgn0036180	-	3179	27.4105	27.7816	-0.0194031	0.93015	0.999568
FBtr0273307	FBgn0034022	-	3857	0.123777	0.0607875	1.02589	1	1
FBtr0273304	FBgn0036180	-	2167	1.41815	0.000931334	10.5724	0.20565	0.999568
FBtr0273305	FBgn0036180	-	3276	0.811086	0.886577	-0.128392	0.92135	0.999568
FBtr0273302	FBgn0034023	-	1800	0.140642	0.177475	-0.33559	1	1
FBtr0273303	FBgn0050203	-	2877	0.617534	0.449103	0.459473	0.29675	0.999568
FBtr0273301	FBgn0038676	-	5461	0.179273	0.216528	-0.272392	1	1
TCONS_00097366	XLOC_004055	-	222	0.456593	2.8848	-2.65949	0.5196	0.999568
FBtr0299737	FBgn0259219	-	1043	1.17594	0.0787545	3.90031	0.25905	0.999568
FBtr0299736	FBgn0259219	-	968	2.7529	2.00198	0.459525	0.536	0.999568
FBtr0073098	FBgn0035422	-	656	1.71794	1.85208	-0.108463	0.9356	0.999568
FBtr0333189	FBgn0058198	-	1567	0.781052	0.671488	0.218056	0.70355	0.999568
FBtr0333188	FBgn0039668	-	3704	0.282659	0.127186	1.15213	1	1
FBtr0073094	FBgn0035425	-	1694	15.6133	16.8867	-0.113113	0.76505	0.999568
FBtr0073095	FBgn0035422	-	887	18.4223	16.3431	0.17277	0.86225	0.999568
FBtr0333185	FBgn0026080	-	2368	0.179778	0.11898	0.595501	1	1
FBtr0073097	FBgn0035422	-	547	664.464	574.27	0.210462	0.32935	0.999568
FBtr0073090	FBgn0035431	-	958	0.122943	0.253076	-1.04158	1	1
FBtr0333182	FBgn0000719	-	5256	0.73726	0.584497	0.334978	0.78215	0.999568
FBtr0073092	FBgn0035426	-	954	0.000521374	0.000758536	-0.540898	1	1
FBtr0073093	FBgn0035425	-	1577	42.8967	48.7299	-0.183941	0.41945	0.999568
TCONS_00000233	XLOC_000138	-	503	0	0	0	1	1
TCONS_00939787	XLOC_189716	-	223	0	1.20268	#NAME?	1	1
FBtr0330332	FBgn0263998	-	5956	1.05779	1.04569	0.0166047	0.9829	0.999568
FBtr0072949	FBgn0035358	-	934	10.7787	7.70264	0.484753	0.1125	0.999568
FBtr0072948	FBgn0027082	-	1509	9.46572	8.77157	0.109877	0.76925	0.999568
FBtr0332586	FBgn0023508	-	3619	0.459282	0.643315	-0.486144	0.7583	0.999568
FBtr0332587	FBgn0023522	-	1544	0	0	0	1	1
FBtr0332580	FBgn0023511	-	3883	0.921378	0.908405	0.0204578	0.9914	0.999568
FBtr0332581	FBgn0052803	-	905	0.642859	0.914319	-0.508196	0.78635	0.999568
FBtr0332582	FBgn0052803	-	800	0.289977	0.332294	-0.196521	1	1
FBtr0332583	FBgn0000117	-	3211	0.290374	0.222358	0.385028	1	1
FBtr0072943	FBgn0020509	-	479	0.185052	0.276151	-0.577525	1	1
FBtr0332588	FBgn0023522	-	1765	2.50563	1.70786	0.552982	0.64685	0.999568
FBtr0332589	FBgn0040340	-	1656	9.87154	5.4375	0.860333	0.32065	0.999568
TCONS_00539599	XLOC_105842	-	201	0	1.43928	#NAME?	0.2282	0.999568
FBtr0332638	FBgn0041775	-	2866	15.424	19.7414	-0.356049	0.759	0.999568
FBtr0332639	FBgn0041775	-	2899	9.3138	9.67204	-0.0544504	0.9723	0.999568
FBtr0332636	FBgn0041775	-	2908	203.513	258.241	-0.343597	0.25355	0.999568
FBtr0332637	FBgn0041775	-	4137	56.0757	64.7813	-0.208201	0.6675	0.999568
FBtr0332634	FBgn0036291	-	1027	1.48116	1.79047	-0.273616	0.8389	0.999568
FBtr0332635	FBgn0041775	-	4155	30.0707	29.7577	0.0150931	0.9833	0.999568
FBtr0332632	FBgn0040010	-	5997	1.37265	1.23969	0.146983	0.8638	0.999568
FBtr0332633	FBgn0064225	-	1945	26.0773	20.9892	0.313144	0.8978	0.999568
FBtr0332630	FBgn0040010	-	1663	2.15383	2.48823	-0.208217	0.872	0.999568
FBtr0332631	FBgn0040010	-	1364	109.34	114.498	-0.0664975	1	1
FBtr0308831	FBgn0003714	-	1596	0.621297	0.568191	0.128908	0.9351	0.999568
FBtr0308830	FBgn0030640	-	2306	0.539377	0.766159	-0.50635	0.69785	0.999568
FBtr0308833	FBgn0262518	-	2043	38.174	38.7431	-0.0213483	1	1
FBtr0308832	FBgn0262518	-	1068	0.496067	1.59311	-1.68324	0.5293	0.999568
FBtr0308835	FBgn0263397	-	2485	0.340636	0.346252	-0.0235931	0.9876	0.999568
FBtr0308834	FBgn0263397	-	2524	0.172873	0.358196	-1.05104	0.63645	0.999568
FBtr0308837	FBgn0263397	-	4152	0.245509	0.243841	0.00983512	1	1
FBtr0308836	FBgn0263397	-	2526	5.16903	5.1166	0.01471	0.9631	0.999568
FBtr0308839	FBgn0030809	-	6241	9.90869	13.0472	-0.396978	0.3341	0.999568
FBtr0308838	FBgn0027601	-	2980	0	0	0	1	1
Novel000048.1	Novel000048	-	2641	0.110374	0.0856057	0.366624	1	1
FBtr0345502	FBgn0263030	-	765	0	0.0827289	#NAME?	1	1
FBtr0345503	FBgn0034755	-	692	0.745662	0.581429	0.358919	0.71015	0.999568
FBtr0345501	FBgn0266807	-	481	2.05162	0.980954	1.0645	0.17675	0.999568
FBtr0345506	FBgn0040359	-	2801	8.96983e-05	9.06442e-05	-0.015133	1	1
FBtr0332884	FBgn0025692	-	1011	3.09761	2.44881	0.339076	0.7006	0.999568
FBtr0345504	FBgn0034753	-	1177	10.3507	9.8649	0.0693549	0.9695	0.999568
TCONS_00458418	XLOC_113593	-	219	1.46074	0	inf	1	1
FBtr0080562	FBgn0019890	-	4809	11.224	10.865	0.0468921	0.8748	0.999568
FBtr0080563	FBgn0028920	-	885	615.938	421.045	0.548811	1	1
FBtr0080560	FBgn0028938	-	2433	0.24293	0.219087	0.149037	1	1
FBtr0080561	FBgn0019890	-	4021	8.61245	8.5182	0.0158757	0.9651	0.999568
FBtr0080566	FBgn0260407	-	707	63.2808	59.3835	0.0917061	0.73955	0.999568
TCONS_01001793	XLOC_223845	-	202	2.2733	1.39891	0.700485	1	1
FBtr0080564	FBgn0053306	-	800	78.7521	61.0837	0.366531	0.7418	0.999568
FBtr0080565	FBgn0053307	-	586	27.0991	19.6034	0.467139	1	1
FBtr0339941	FBgn0034776	-	1519	0.0347307	0.091614	-1.39936	1	1
FBtr0339940	FBgn0000633	-	5879	0.779803	0.526499	0.566678	0.14185	0.999568
FBtr0339943	FBgn0265496	-	2633	0.150036	0.0847028	0.82483	1	1
FBtr0080569	FBgn0001961	-	1666	14.9536	16.4448	-0.137139	0.665	0.999568
FBtr0339945	FBgn0030468	-	1987	0.509815	0.56713	-0.153706	0.94745	0.999568
FBtr0339944	FBgn0265497	-	1591	0.541597	0.713428	-0.397549	0.4081	0.999568
FBtr0339946	FBgn0030467	-	1780	0.465395	0.331514	0.489385	0.8702	0.999568
FBtr0112845	FBgn0004875	-	7623	0	0	0	1	1
FBtr0112844	FBgn0004875	-	7323	0.635777	0.684043	-0.105566	0.93345	0.999568
FBtr0112847	FBgn0004956	-	2443	0.146239	0.09011	0.698572	1	1
FBtr0112846	FBgn0004914	-	3600	5.40517	3.97288	0.444153	0.3716	0.999568
FBtr0112841	FBgn0004174	-	359	0	0.184897	#NAME?	1	1
TCONS_00505067	XLOC_115569	-	493	3.051	1.14692	1.41151	0.0353	0.999568
FBtr0112843	FBgn0004860	-	6020	2.07033	2.45179	-0.243971	0.4852	0.999568
FBtr0346741	FBgn0267412	-	811	0	0	0	1	1
Novel000149.1	Novel000149	-	958	0.338261	0.228974	0.562953	1	1
FBtr0346740	FBgn0267411	-	942	0	0	0	1	1
FBtr0113464	FBgn0053519	-	13189	0.10778	0.0254206	2.08402	1	1
FBtr0113465	FBgn0053542	-	2221	0.276202	0.242139	0.189888	1	1
FBtr0334339	FBgn0039663	-	3479	6.26194	8.41096	-0.42566	0.1404	0.999568
FBtr0113461	FBgn0086610	-	660	0.0385398	0.0340736	0.177695	1	1
FBtr0332422	FBgn0033607	-	2849	3.11843	3.07808	0.0187884	0.97945	0.999568
FBtr0334335	FBgn0262167	-	5610	0.207786	0.393524	-0.921354	0.80195	0.999568
FBtr0334334	FBgn0003134	-	3210	1.36302	1.17284	0.216792	0.8593	0.999568
FBtr0334337	FBgn0039205	-	563	32.6192	23.5621	0.469253	1	1
FBtr0334336	FBgn0266758	-	2963	0.132937	0.265398	-0.997409	1	1
FBtr0334331	FBgn0037635	-	2072	1.11339	1.06103	0.0694897	0.95965	0.999568
FBtr0113469	FBgn0053556	-	6298	0.0601178	0	inf	1	1
FBtr0334333	FBgn0039201	-	2323	0.0718131	0.0591712	0.279353	1	1
FBtr0334332	FBgn0037633	-	2186	1.7392	1.5747	0.143352	0.94725	0.999568
FBtr0332420	FBgn0041174	-	946	16.6918	15.1027	0.144337	1	1
FBtr0332427	FBgn0039089	-	3278	0.454662	0.31486	0.530082	0.37885	0.999568
FBtr0112594	FBgn0085398	-	1800	0.000933592	0.00096877	-0.0533608	1	1
FBtr0112593	FBgn0085397	-	4859	0.803242	0.586173	0.454507	0.23765	0.999568
FBtr0112592	FBgn0085396	-	1703	0.171485	0.199804	-0.220507	1	1
FBtr0089323	FBgn0036362	-	876	38.4526	15.6176	1.2999	5e-05	0.0107714
FBtr0089322	FBgn0036290	-	1180	7.71783	7.49752	0.0417814	0.9459	0.999568
FBtr0089321	FBgn0036290	-	1115	64.1553	61.9431	0.0506248	1	1
FBtr0089320	FBgn0000529	-	2012	0.100865	0.166412	-0.722325	1	1
FBtr0089327	FBgn0005561	-	4693	0.00113807	0	inf	1	1
FBtr0089324	FBgn0002565	-	2304	2.5219	14.4354	-2.51703	1	1
FBtr0089329	FBgn0025885	-	1986	98.0906	85.5623	0.19714	0.2966	0.999568
FBtr0089328	FBgn0005561	-	4102	0	0	0	1	1
FBtr0346909	FBgn0266901	-	3150	0.400031	0.440521	-0.139097	0.78965	0.999568
FBtr0346908	FBgn0263413	-	7596	0.289798	0.285737	0.0203625	1	1
FBtr0088492	FBgn0050001	-	1327	10.8698	11.1335	-0.0345814	0.89785	0.999568
FBtr0088493	FBgn0033446	-	1047	59.4586	38.7862	0.616342	1	1
FBtr0083143	FBgn0000047	-	1595	15.1745	3.63189	2.06285	5e-05	0.0107714
FBtr0083142	FBgn0028984	-	1518	8.0144	7.38578	0.117844	0.89175	0.999568
FBtr0083145	FBgn0038342	-	881	0.300658	0.160769	0.903137	1	1
FBtr0344324	FBgn0259834	-	3414	7.82428	6.7542	0.212173	0.6448	0.999568
FBtr0083147	FBgn0038344	-	6970	10.8906	12.1573	-0.158738	0.4191	0.999568
FBtr0088495	FBgn0027589	-	4116	0.47563	0.400256	0.248915	0.79515	0.999568
FBtr0344329	FBgn0266390	-	1120	0.0755017	0.170295	-1.17345	1	1
FBtr0083148	FBgn0038345	-	1019	0.104055	0.153469	-0.560594	1	1
TCONS_00063287	XLOC_014386	-	234	2.62414	0.993155	1.40175	0.57725	0.999568
FBtr0088499	FBgn0023143	-	4343	135.044	154.76	-0.196602	0.30535	0.999568
FBtr0082230	FBgn0037809	-	1001	15.8807	17.8816	-0.171198	0.50785	0.999568
FBtr0082231	FBgn0037810	-	4775	60.2737	74.4807	-0.305339	0.09835	0.999568
FBtr0082232	FBgn0037810	-	4676	0.108213	0.136765	-0.337833	1	1
FBtr0082233	FBgn0037811	-	2407	2.76266	3.657	-0.404603	0.18045	0.999568
FBtr0082234	FBgn0037812	-	660	0.303925	0.270182	0.169783	1	1
FBtr0082235	FBgn0051406	-	636	0	0	0	1	1
FBtr0082236	FBgn0051406	-	1010	0.0415807	0.0387295	0.102479	1	1
FBtr0082237	FBgn0015396	-	3860	58.5699	70.7061	-0.271674	0.1488	0.999568
FBtr0345058	FBgn0261289	-	686	0.249326	0.128664	0.954427	1	1
FBtr0082239	FBgn0266717	-	15402	13.6455	16.138	-0.24203	0.45005	0.999568
FBtr0310148	FBgn0033372	-	2279	0.942507	1.16042	-0.300071	0.73945	0.999568
FBtr0310149	FBgn0032387	-	2300	9.08864	7.5921	0.259565	0.63105	0.999568
FBtr0310140	FBgn0033996	-	1993	2.72286	1.02995	1.40255	0.3205	0.999568
FBtr0310141	FBgn0033502	-	1705	2.86316	2.20373	0.377659	0.61255	0.999568
FBtr0310142	FBgn0033502	-	2487	0.644538	0.571239	0.174171	0.88935	0.999568
FBtr0310143	FBgn0033373	-	1708	5.03312	5.56918	-0.14601	0.88905	0.999568
FBtr0310144	FBgn0033373	-	1793	1.96371	1.46079	0.426833	0.82305	0.999568
FBtr0310145	FBgn0033373	-	1749	1.02137	0.544221	0.908246	0.78505	0.999568
FBtr0310146	FBgn0033373	-	1402	3.67148	4.03308	-0.135521	0.92905	0.999568
FBtr0310147	FBgn0033372	-	2351	7.87573	8.03612	-0.0290847	0.9217	0.999568
FBtr0084690	FBgn0004885	-	5368	6.53513	5.60932	0.220391	0.4575	0.999568
FBtr0084691	FBgn0003719	-	3359	0.495412	0.455526	0.121095	0.7791	0.999568
FBtr0084692	FBgn0000140	-	6338	40.0793	50.681	-0.338586	0.0693	0.999568
FBtr0084693	FBgn0040600	-	761	8.98484	6.56168	0.453426	1	1
FBtr0084697	FBgn0039225	-	3003	0.129924	0.0793383	0.711582	1	1
FBtr0084698	FBgn0039228	-	927	0.520177	0.365674	0.508444	0.8554	0.999568
FBtr0088146	FBgn0082585	-	2795	3.1287	2.58263	0.276722	0.57695	0.999568
FBtr0088140	FBgn0000581	-	9325	6.95897	8.88062	-0.351787	0.2791	0.999568
FBtr0088141	FBgn0015872	-	1745	18.8939	8.66582	1.12451	0.0003	0.0456606
FBtr0088142	FBgn0015872	-	1444	0.949684	1.06705	-0.168105	0.897	0.999568
TCONS_01022786	XLOC_196643	-	222	0.485287	0.429929	0.174742	0.47475	0.999568
FBtr0100109	FBgn0054054	-	545	4.71535	3.67484	0.359683	0.4067	0.999568
FBtr0100106	FBgn0054051	-	771	0.0323156	0.151139	-2.22557	1	1
Novel000135.1	Novel000135	-	567	0.2054	0.0837798	1.29376	1	1
FBtr0342587	FBgn0265794	-	316	0.273846	0.511476	-0.9013	1	1
FBtr0342586	FBgn0265793	-	671	0.261431	0.363857	-0.476942	1	1
FBtr0342585	FBgn0265792	-	1049	0.327037	0.259227	0.335236	1	1
FBtr0342584	FBgn0051870	-	537	0.295137	0.0706628	2.06236	1	1
FBtr0342583	FBgn0051870	-	1097	0.122062	0.11204	0.1236	1	1
FBtr0342582	FBgn0265791	-	533	0.0498839	0.0928335	-0.896071	1	1
FBtr0342581	FBgn0032391	-	1532	23.0725	24.7921	-0.103702	1	1
FBtr0342580	FBgn0032390	-	987	8.29687	12.5561	-0.597743	0.33915	0.999568
FBtr0342589	FBgn0265796	-	370	0.0955659	0.089738	0.0907774	1	1
FBtr0342588	FBgn0265797	-	329	0.124049	0.341137	-1.45944	1	1
FBtr0087347	FBgn0023441	-	4375	1.1466	0.442698	1.37297	0.32645	0.999568
FBtr0087346	FBgn0023441	-	5512	5.12206	6.41145	-0.323926	0.36405	0.999568
FBtr0087345	FBgn0023441	-	3671	0.0284176	0.000386745	6.19926	1	1
FBtr0087344	FBgn0023441	-	5256	2.32127	2.94649	-0.344079	0.4951	0.999568
FBtr0306338	FBgn0264857	-	1733	7.91668e-06	0	inf	1	1
FBtr0306339	FBgn0264857	-	1825	0	0.0534045	#NAME?	1	1
FBtr0087341	FBgn0262512	-	659	236.367	207.211	0.18993	0.32435	0.999568
FBtr0345582	FBgn0034288	-	1182	0.126416	0.0790308	0.677698	1	1
FBtr0306335	FBgn0085423	-	4936	0.0454192	0	inf	1	1
FBtr0306336	FBgn0031968	-	1264	4.66486	5.21708	-0.161409	0.82455	0.999568
FBtr0306337	FBgn0000014	-	5269	0.148232	0.202002	-0.446514	1	1
FBtr0306330	FBgn0004919	-	3725	0.000149036	0.0864716	-9.18042	1	1
FBtr0306331	FBgn0052296	-	7755	2.84618	3.11141	-0.128538	0.65385	0.999568
FBtr0087349	FBgn0034033	-	735	1.22376	0.971114	0.333602	0.90225	0.999568
FBtr0306333	FBgn0085423	-	6208	1.55343	1.59193	-0.0353191	0.959	0.999568
FBtr0085279	FBgn0039576	-	503	0	0	0	1	1
FBtr0085278	FBgn0004171	-	1066	0.0389161	0.0547046	-0.491295	1	1
FBtr0085271	FBgn0053213	-	1279	21.4073	22.9244	-0.098777	0.78735	0.999568
FBtr0085270	FBgn0039557	-	1246	19.7932	21.1983	-0.0989486	0.6745	0.999568
FBtr0085272	FBgn0039554	-	2491	27.422	32.7986	-0.2583	0.1927	0.999568
FBtr0085277	FBgn0002865	-	1319	0.0950575	0.0848353	0.164136	1	1
FBtr0309316	FBgn0039942	-	1451	27.7941	28.967	-0.0596305	0.8633	0.999568
TCONS_00707053	XLOC_134471	-	346	0.331267	0.306427	0.11245	1	1
FBtr0309312	FBgn0264712	-	2443	1.10038	1.00858	0.12568	1	1
FBtr0344268	FBgn0037448	-	3672	0	0	0	1	1
FBtr0309319	FBgn0003261	-	4362	1.85809	2.0951	-0.173198	0.9171	0.999568
FBtr0309318	FBgn0037395	-	1089	0.000968037	0.000983061	-0.0222184	1	1
FBtr0344269	FBgn0037448	-	4904	0.171753	0.0960105	0.839069	1	1
TCONS_00554193	XLOC_093566	-	994	0.837922	0.670589	0.321386	0.80625	0.999568
FBtr0344468	FBgn0265313	-	1676	7.66493	5.50287	0.478087	0.39855	0.999568
FBtr0329908	FBgn0003130	-	2458	0.0975563	0.10502	-0.106359	1	1
FBtr0329909	FBgn0265991	-	1963	4.17114	2.83608	0.556546	0.5899	0.999568
FBtr0329900	FBgn0015558	-	3078	0.508996	0.859426	-0.755718	0.42945	0.999568
FBtr0329901	FBgn0015558	-	7199	0.995938	0.942348	0.0797955	0.8511	0.999568
FBtr0329902	FBgn0015558	-	3853	0.290772	7.62775e-05	11.8963	1	1
FBtr0329903	FBgn0015558	-	6642	0	0.0167331	#NAME?	1	1
FBtr0329904	FBgn0263971	-	450	0.0699711	0.185607	-1.40742	1	1
FBtr0329905	FBgn0031505	-	762	9.28103	7.69685	0.270016	0.7402	0.999568
FBtr0329906	FBgn0015600	-	4265	4.05367	2.82483	0.521064	0.3547	0.999568
FBtr0306802	FBgn0033097	-	1278	0.84431	0.393108	1.10285	0.0449	0.999568
FBtr0306800	FBgn0036717	-	2980	0.15075	0.113737	0.406458	1	1
FBtr0306801	FBgn0030791	-	1792	0	0	0	1	1
FBtr0306806	FBgn0037565	-	5535	1.05006	0.439131	1.25774	0.0745	0.999568
FBtr0306807	FBgn0017558	-	2732	19.7705	16.8992	0.226394	0.3733	0.999568
FBtr0306804	FBgn0051464	-	741	0.319139	0.60673	-0.926868	0.20655	0.999568
FBtr0306805	FBgn0037565	-	5550	1.146	0.581272	0.97932	0.3939	0.999568
FBtr0071145	FBgn0000427	-	5696	16.1845	28.8293	-0.832924	0.2752	0.999568
FBtr0071146	FBgn0000427	-	3737	38.1803	35.2207	0.116404	0.86415	0.999568
FBtr0071147	FBgn0000427	-	3751	302.33	290.15	0.0593265	0.79975	0.999568
FBtr0071140	FBgn0029971	-	487	260.162	229.144	0.183154	0.3948	0.999568
FBtr0071141	FBgn0029971	-	509	5.474	5.19019	0.0768088	0.95905	0.999568
FBtr0071142	FBgn0029970	-	2581	30.3356	36.9877	-0.286034	0.142	0.999568
FBtr0071143	FBgn0029969	-	1517	131.604	134.204	-0.0282266	1	1
FBtr0079791	FBgn0032077	-	864	19.1289	17.9533	0.0915055	1	1
FBtr0079790	FBgn0032078	-	1931	6.33897	12.2974	-0.956027	0.0492	0.999568
FBtr0346772	FBgn0267433	-	13680	0	0	0	1	1
FBtr0346773	FBgn0267489	-	3744	0	0	0	1	1
FBtr0079795	FBgn0267252	-	2799	0.578914	0.654366	-0.17675	0.91245	0.999568
FBtr0079797	FBgn0267252	-	12225	0.206191	0.233095	-0.17694	1	1
FBtr0079796	FBgn0267252	-	1019	25.4129	21.5355	0.238844	1	1
FBtr0079799	FBgn0010314	-	1147	38.7072	44.5938	-0.204242	0.33725	0.999568
FBtr0343720	FBgn0266160	-	324	3.27401	2.38289	0.458346	0.8277	0.999568
FBtr0343721	FBgn0001987	-	4468	1.14835	1.57106	-0.452176	0.5059	0.999568
FBtr0343722	FBgn0001989	-	992	2.17223	2.53496	-0.222789	0.8574	0.999568
FBtr0343723	FBgn0266161	-	372	0.0945054	0.702439	-2.8939	1	1
FBtr0343724	FBgn0266162	-	552	0.336488	0.265189	0.343537	1	1
FBtr0343725	FBgn0028858	-	1023	0.0387683	0.18516	-2.25582	1	1
FBtr0343726	FBgn0028644	-	4924	0.230644	2.82608e-05	12.9946	1	1
FBtr0343727	FBgn0028644	-	4695	0.205824	0.293544	-0.512169	1	1
FBtr0343728	FBgn0013433	-	2870	0.0708809	9.61572e-05	9.52579	1	1
FBtr0343729	FBgn0266165	-	840	0.134388	0.0977659	0.459006	1	1
FBtr0344340	FBgn0039531	-	1375	4.02422	3.91385	0.0401218	0.95875	0.999568
FBtr0344347	FBgn0038532	-	5857	0.356409	0.543698	-0.609274	0.64275	0.999568
FBtr0345105	FBgn0266696	-	5863	1.28522	0.467008	1.46049	0.42475	0.999568
FBtr0336949	FBgn0016930	-	2826	0.0723353	0.237798	-1.71697	1	1
FBtr0077420	FBgn0031623	-	591	5.50314	4.67892	0.234079	0.6491	0.999568
FBtr0077423	FBgn0000227	-	1352	0.0897171	0.535418	-2.57721	0.06715	0.999568
FBtr0077422	FBgn0031622	-	1685	0.0683399	0.127231	-0.896648	1	1
FBtr0077425	FBgn0028482	-	2730	6.44437	4.60675	0.484289	0.0633	0.999568
FBtr0077427	FBgn0020762	-	3846	1.50801	1.60459	-0.0895579	0.88995	0.999568
FBtr0077426	FBgn0020762	-	4181	7.0618	5.77239	0.290867	1	1
FBtr0077429	FBgn0026319	-	2361	2.57836	1.66149	0.633977	0.0654	0.999568
FBtr0077428	FBgn0031596	-	943	0.0809842	0.0637993	0.3441	1	1
TCONS_00065582	XLOC_018917	-	201	1.52945	0.67714	1.17549	1	1
FBtr0345103	FBgn0266696	-	6398	2.34044	2.13568	0.132085	0.8845	0.999568
FBtr0343898	FBgn0266234	-	443	0.0677782	0	inf	1	1
FBtr0343899	FBgn0266234	-	693	0.0359986	0.0318266	0.177706	1	1
FBtr0343892	FBgn0266229	-	1275	0.224541	0.204969	0.131577	1	1
FBtr0343893	FBgn0266230	-	606	0.128231	0.115006	0.157034	1	1
FBtr0343890	FBgn0266227	-	2517	1.4854	1.5685	-0.0785333	0.84365	0.999568
FBtr0343891	FBgn0266228	-	811	0.799103	0.897013	-0.166748	0.7618	0.999568
FBtr0343896	FBgn0266233	-	766	0.122093	0.138135	-0.178101	1	1
FBtr0343897	FBgn0266226	-	501	0.113456	0.103279	0.135594	1	1
FBtr0343894	FBgn0266231	-	616	0.210292	0.225138	-0.0984108	1	1
FBtr0343895	FBgn0266232	-	1115	0.0943357	0.137097	-0.53932	1	1
FBtr0344048	FBgn0266318	-	532	0.0530712	0.0461831	0.200566	1	1
FBtr0344041	FBgn0266312	-	1351	0.696923	0.573645	0.28084	0.8673	0.999568
FBtr0344042	FBgn0266313	-	814	0.84976	0.619507	0.455936	0.865	0.999568
FBtr0344043	FBgn0266313	-	971	0.107995	0.0748675	0.528555	1	1
FBtr0344044	FBgn0266314	-	272	0.222264	0.196747	0.175931	1	1
FBtr0344045	FBgn0266315	-	951	0.556616	0.249907	1.15529	0.33455	0.999568
TCONS_00790782	XLOC_150930	-	204	0	0	0	1	1
TCONS_00439055	XLOC_126816	-	937	0.467536	0.3827	0.288864	0.8578	0.999568
FBtr0301124	FBgn0026083	-	8145	2.08709	1.68513	0.308628	0.8149	0.999568
FBtr0301125	FBgn0031920	-	1730	0.497308	0.508609	-0.0324158	0.98605	0.999568
FBtr0301126	FBgn0024814	-	1230	3.81012	4.3281	-0.183897	0.90725	0.999568
FBtr0301127	FBgn0033687	-	728	0.282819	0	inf	1	1
FBtr0301121	FBgn0267861	-	1102	1.08246	0.84746	0.353099	0.89015	0.999568
FBtr0344348	FBgn0266405	-	249	23.2486	2.62706	3.14562	0.33425	0.999568
FBtr0301128	FBgn0031976	-	1493	0	0	0	1	1
FBtr0301129	FBgn0031976	-	1265	0.0336065	0	inf	1	1
FBtr0337104	FBgn0020379	-	3861	0.100196	0.177478	-0.824814	1	1
FBtr0336665	FBgn0033081	-	939	145.921	163.749	-0.1663	1	1
FBtr0331991	FBgn0014417	-	2642	103.244	117.961	-0.192262	0.33225	0.999568
FBtr0331204	FBgn0031251	-	4292	0.000459726	0.553736	-10.2342	1	1
FBtr0081011	FBgn0032634	-	516	90.7523	94.8599	-0.0638647	0.90265	0.999568
FBtr0081010	FBgn0051803	-	929	0.0964722	0.408753	-2.08305	1	1
FBtr0081013	FBgn0015609	-	10412	0.200153	0.149377	0.422145	1	1
FBtr0081015	FBgn0015609	-	13384	0.660307	0.523277	0.335564	0.4794	0.999568
FBtr0081014	FBgn0015609	-	10409	0.144503	0.214585	-0.570451	1	1
FBtr0081017	FBgn0015609	-	10412	0.0919158	0.278341	-1.59847	1	1
FBtr0081016	FBgn0015609	-	13228	4.42035e-05	0.120774	-11.4159	1	1
FBtr0081019	FBgn0015609	-	10409	0.227853	0.0797669	1.51424	1	1
FBtr0081018	FBgn0015609	-	10412	0.0578334	0.146481	-1.34074	1	1
FBtr0071968	FBgn0034827	-	2499	0.0897719	0.117171	-0.384284	1	1
FBtr0071969	FBgn0034829	-	2988	0.125266	0.107655	0.218581	1	1
FBtr0071966	FBgn0034820	-	989	0.0891988	0.099743	-0.161192	1	1
FBtr0071967	FBgn0050192	-	373	0	0	0	1	1
FBtr0071964	FBgn0045483	-	1104	0.171182	0.244016	-0.511446	1	1
FBtr0071965	FBgn0045482	-	1101	0.0957891	0.0868202	0.141831	1	1
FBtr0071963	FBgn0034816	-	1670	5.50223	7.56166	-0.458687	1	1
FBtr0071960	FBgn0021979	-	1944	3.05665	3.4346	-0.168191	0.85495	0.999568
FBtr0071961	FBgn0021979	-	1451	0.489572	0.572044	-0.224603	0.9351	0.999568
FBtr0074301	FBgn0030752	-	1261	8.27307	9.10869	-0.13882	0.9013	0.999568
FBtr0074300	FBgn0261609	-	1200	157.188	144.365	0.122775	1	1
FBtr0074303	FBgn0030749	-	1731	0	0	0	1	1
FBtr0074302	FBgn0030749	-	1233	3.26551	3.37771	-0.048736	1	1
FBtr0074305	FBgn0010416	-	2297	4.96349	5.65302	-0.187667	0.7161	0.999568
FBtr0074304	FBgn0030746	-	3518	0.2031	0.33495	-0.721759	1	1
FBtr0074307	FBgn0030744	-	1594	27.8567	26.5548	0.0690514	0.8121	0.999568
FBtr0074306	FBgn0030744	-	1406	3.56437	5.43429	-0.608443	0.4684	0.999568
FBtr0074309	FBgn0030744	-	1380	0	0	0	1	1
FBtr0074308	FBgn0030744	-	1608	26.6167	26.6673	-0.00274057	0.9926	0.999568
FBtr0332037	FBgn0031739	-	1297	0.544536	0.1957	1.47639	0.52775	0.999568
FBtr0332030	FBgn0069354	-	1069	0	0.184508	#NAME?	1	1
FBtr0332031	FBgn0264352	-	1157	0.110445	0.114051	-0.0463428	1	1
FBtr0332032	FBgn0264352	-	1182	0.000562977	0.000555009	0.0205651	1	1
FBtr0332033	FBgn0032913	-	1353	88.4346	71.2589	0.311541	1	1
FBtr0330065	FBgn0035715	-	1189	8.7637	10.0071	-0.191407	0.77485	0.999568
FBtr0334543	FBgn0267698	-	4937	0	0	0	1	1
TCONS_00126476	XLOC_031429	-	201	0	1.43928	#NAME?	1	1
TCONS_00692072	XLOC_162210	-	202	2.2733	0.65857	1.78738	1	1
TCONS_00692075	XLOC_162218	-	221	0.961334	2.52753	-1.39462	0.52365	0.999568
FBtr0345339	FBgn0011260	-	3440	0.001247	0.00127487	-0.0318815	1	1
FBtr0334544	FBgn0267698	-	4827	0.515373	0.355529	0.535653	0.75855	0.999568
TCONS_01001433	XLOC_222862	-	204	2.10911	0.62376	1.75757	1	1
FBtr0334545	FBgn0261641	-	3589	8.42163	10.0603	-0.256507	1	1
FBtr0080440	FBgn0032482	-	2153	2.52782	1.97191	0.358294	0.812	0.999568
FBtr0334548	FBgn0002413	-	4156	24.4608	28.7802	-0.234609	0.4727	0.999568
FBtr0334549	FBgn0039844	-	2894	0.204706	0.210545	-0.0405751	1	1
TCONS_00038104	XLOC_013338	-	203	0.722707	0	inf	1	1
FBtr0087493	FBgn0261823	-	6643	10.6569	12.0905	-0.18208	0.4148	0.999568
Novel000095.1	Novel000095	-	1697	1.38133	1.3591	0.0234058	0.98265	0.999568
FBtr0080760	FBgn0001986	-	3585	26.2451	27.2369	-0.0535101	0.7795	0.999568
FBtr0080761	FBgn0028507	-	1582	28.7613	28.8493	-0.00440809	0.98795	0.999568
FBtr0080763	FBgn0041627	-	2304	24.0555	25.5661	-0.0878646	0.66985	0.999568
FBtr0080764	FBgn0001990	-	1691	24.6906	25.465	-0.0445519	1	1
FBtr0080765	FBgn0001987	-	4095	8.1319	6.39502	0.346643	0.3029	0.999568
FBtr0080767	FBgn0001987	-	4186	0	0	0	1	1
FBtr0080768	FBgn0001987	-	3975	6.73969	5.85459	0.203116	0.57555	0.999568
FBtr0080769	FBgn0001987	-	4007	0.278804	0.207857	0.42366	1	1
Novel000077.1	Novel000077	-	201	0.764727	0.67714	0.175491	1	1
FBtr0345334	FBgn0031684	-	630	1.85961	1.11797	0.734117	0.81035	0.999568
FBtr0335268	FBgn0264958	-	199	0.747281	0.716842	0.0599961	0.73015	0.999568
FBtr0335269	FBgn0022288	-	1811	19.4454	17.9862	0.112539	0.77435	0.999568
FBtr0335264	FBgn0264956	-	1602	0.136997	0.180423	-0.397245	1	1
FBtr0335265	FBgn0264957	-	849	0.0258861	0.0724767	-1.48534	1	1
FBtr0335266	FBgn0033047	-	2266	5.24379	3.82672	0.454502	0.23795	0.999568
FBtr0335267	FBgn0264958	-	318	3.1757	4.49206	-0.500302	0.394	0.999568
FBtr0335260	FBgn0033020	-	672	0.00686348	2.19829e-05	8.28641	1	1
FBtr0335261	FBgn0261429	-	2652	0.305694	0.23097	0.404381	1	1
FBtr0335262	FBgn0259247	-	3645	0.19736	0.060123	1.71485	1	1
FBtr0335263	FBgn0050438	-	2226	0.570871	0.698767	-0.291648	0.80595	0.999568
FBtr0334132	FBgn0264748	-	1240	2.50409	1.91885	0.384051	0.32865	0.999568
FBtr0334131	FBgn0264747	-	1406	1.66808	1.49533	0.157717	0.92275	0.999568
FBtr0334130	FBgn0264747	-	1247	91.6335	96.496	-0.0745942	1	1
FBtr0334137	FBgn0264815	-	4561	0.243889	0.292995	-0.26465	1	1
FBtr0334136	FBgn0264815	-	3862	2.79555	1.73423	0.688842	0.5787	0.999568
FBtr0334135	FBgn0264815	-	4703	0.470694	0.174631	1.43048	0.6878	0.999568
FBtr0334134	FBgn0264744	-	1273	13.5055	13.9773	-0.0495432	0.8466	0.999568
FBtr0334139	FBgn0264815	-	4203	0	0	0	1	1
FBtr0334138	FBgn0264815	-	5563	0	0	0	1	1
FBtr0074875	FBgn0261283	-	3818	41.3808	36.1946	0.193188	0.4191	0.999568
FBtr0074874	FBgn0261283	-	3951	1.1119	0.746378	0.575043	0.74575	0.999568
FBtr0074873	FBgn0261283	-	3841	9.83352	15.2438	-0.632439	0.1336	0.999568
FBtr0074872	FBgn0036932	-	759	16.8065	17.0231	-0.0184793	0.96255	0.999568
FBtr0074871	FBgn0036934	-	3243	0.628349	0.505282	0.314477	0.54975	0.999568
FBtr0074870	FBgn0036935	-	3522	3.99799	3.0663	0.382776	0.1551	0.999568
FBtr0074879	FBgn0036909	-	1642	21.0345	21.1091	-0.00510886	0.98645	0.999568
FBtr0070374	FBgn0029589	-	720	0	0.119158	#NAME?	1	1
FBtr0070375	FBgn0025624	-	1240	19.2708	17.3149	0.154402	0.72935	0.999568
FBtr0070376	FBgn0040395	-	2970	16.8946	18.7157	-0.147689	1	1
FBtr0070377	FBgn0040395	-	2860	9.79603	8.41772	0.218768	0.5789	0.999568
FBtr0070370	FBgn0023515	-	3385	6.10671	7.47952	-0.292551	1	1
FBtr0070371	FBgn0028969	-	2170	19.3986	21.1666	-0.12584	0.7077	0.999568
FBtr0070372	FBgn0026090	-	720	23.3523	20.9354	0.15762	1	1
Novel000136.1	Novel000136	-	1267	0.704888	0.647228	0.12312	0.8029	0.999568
FBtr0070378	FBgn0000382	-	4560	15.6528	18.6606	-0.253576	0.2479	0.999568
FBtr0070379	FBgn0000382	-	7664	1.34439	1.37214	-0.0294705	0.9634	0.999568
TCONS_00912278	XLOC_186132	-	345	0.472195	0	inf	1	1
FBtr0330304	FBgn0264324	-	7513	0	0	0	1	1
FBtr0330305	FBgn0264324	-	6710	0	0	0	1	1
FBtr0330306	FBgn0265274	-	2136	18.9352	15.8164	0.259646	0.4876	0.999568
FBtr0330300	FBgn0039633	-	11681	0.113481	0.199857	-0.816518	1	1
FBtr0330301	FBgn0039633	-	11931	0.000315582	0.00100521	-1.6714	1	1
FBtr0330302	FBgn0053203	-	3243	0.595211	0.800619	-0.427713	0.7183	0.999568
FBtr0330303	FBgn0264324	-	6722	1.03417	1.49681	-0.53342	0.50955	0.999568
FBtr0330308	FBgn0039214	-	13232	0.172675	0.315705	-0.870515	1	1
FBtr0330309	FBgn0039214	-	13284	0.000845146	0.00127157	-0.589344	1	1
TCONS_00648749	XLOC_148628	-	220	0	0	0	1	1
FBtr0346378	FBgn0031070	-	3461	0	0	0	1	1
TCONS_00473649	XLOC_096535	-	213	2.31271	1.02559	1.17312	0.519	0.999568
FBtr0343103	FBgn0265992	-	745	0.255318	0.371697	-0.54183	1	1
FBtr0076439	FBgn0035977	-	1355	3.43139	2.23425	0.619	0.8112	0.999568
FBtr0071429	FBgn0030163	-	1179	4.04189	2.52682	0.67771	0.1209	0.999568
FBtr0071423	FBgn0030174	-	3511	0.49892	0.00049963	9.96373	0.20605	0.999568
FBtr0076430	FBgn0035971	-	983	0.13546	0.0599519	1.17598	1	1
FBtr0076433	FBgn0035975	-	1593	2.12751	0.781926	1.44407	0.0794	0.999568
FBtr0076432	FBgn0035975	-	1606	1.73864	1.97442	-0.183474	0.74505	0.999568
FBtr0076435	FBgn0035975	-	1698	0	0	0	1	1
FBtr0076434	FBgn0035975	-	1286	1.97036	1.56623	0.331159	0.6321	0.999568
FBtr0071424	FBgn0005391	-	1553	4336.71	4429.24	-0.0304591	0.921	0.999568
FBtr0077748	FBgn0041337	-	1844	1.22871	2.38129	-0.954598	0.0162	0.731252
FBtr0077740	FBgn0031451	-	1440	0.17725	0	inf	1	1
FBtr0331324	FBgn0032791	-	1357	2.53502	2.3677	0.0985084	0.94845	0.999568
FBtr0077743	FBgn0031441	-	1144	0.126117	0.166404	-0.399929	1	1
FBtr0077744	FBgn0026479	-	2711	50.0165	54.0804	-0.112703	1	1
FBtr0077745	FBgn0031436	-	621	36.58	32.9527	0.150659	1	1
FBtr0077746	FBgn0031434	-	1654	16.9951	22.0408	-0.375061	0.16715	0.999568
FBtr0077747	FBgn0026778	-	1484	16.8005	18.6649	-0.151821	0.51195	0.999568
FBtr0310388	FBgn0263743	-	676	0.17783	0.129941	0.452642	1	1
FBtr0310389	FBgn0263742	-	907	0.123221	0.200076	-0.699306	1	1
FBtr0310386	FBgn0263740	-	1922	228.28	223.545	0.0302402	1	1
FBtr0310387	FBgn0263740	-	1886	0.0848142	0.0728915	0.218555	1	1
FBtr0310384	FBgn0263738	-	2158	3.65126	4.25877	-0.222042	0.6598	0.999568
FBtr0310385	FBgn0263755	-	2386	23.5532	25.0777	-0.0904827	0.8724	0.999568
FBtr0310382	FBgn0263738	-	2340	0.282795	0.585597	-1.05015	0.52725	0.999568
FBtr0310383	FBgn0263738	-	2385	0.161614	0.140424	0.202768	1	1
FBtr0310380	FBgn0263738	-	2400	0.161519	0.105424	0.615497	1	1
FBtr0310381	FBgn0263738	-	2445	0.0671753	0.0387393	0.794134	1	1
FBtr0088308	FBgn0261862	-	2901	52.281	50.0081	0.064126	0.81435	0.999568
FBtr0331327	FBgn0032793	-	1349	0.657002	0.184922	1.82898	0.6358	0.999568
FBtr0088306	FBgn0033528	-	864	53.5053	55.5679	-0.0545679	0.7973	0.999568
FBtr0088307	FBgn0261862	-	2882	24.6098	32.6777	-0.409074	0.27975	0.999568
FBtr0333671	FBgn0039897	-	2893	0.711951	0.426943	0.737733	0.604	0.999568
FBtr0333670	FBgn0016126	-	2604	26.41	22.5457	0.228235	0.599	0.999568
FBtr0333673	FBgn0264607	-	3735	1.76413	1.2637	0.481297	0.6779	0.999568
TCONS_00044283	XLOC_022002	-	224	0	1.23874	#NAME?	1	1
FBtr0333674	FBgn0264607	-	3855	0.896261	0.511078	0.810375	0.64335	0.999568
TCONS_00879946	XLOC_144119	-	575	0.454889	0.164073	1.47117	0.67055	0.999568
TCONS_00034298	XLOC_007184	-	210	1.20194	0	inf	1	1
FBtr0308206	FBgn0020621	-	4431	0.000358215	0	inf	1	1
FBtr0308207	FBgn0029518	-	835	0.222578	0.250217	-0.168868	1	1
FBtr0308204	FBgn0036958	-	2953	1.00635	0.757903	0.409045	0.85645	0.999568
FBtr0308205	FBgn0050343	-	1064	2.67661	2.86982	-0.100555	0.9648	0.999568
FBtr0308202	FBgn0035533	-	3359	0.00826424	0.262042	-4.98677	1	1
FBtr0308200	FBgn0003380	-	4138	0.165227	0.0664723	1.31362	1	1
FBtr0308201	FBgn0035533	-	3422	0.827713	0.127859	2.69458	0.2645	0.999568
FBtr0308208	FBgn0005427	-	3589	7.75686	7.60943	0.0276848	0.9926	0.999568
FBtr0308209	FBgn0005427	-	4051	0	0	0	1	1
TCONS_00170779	XLOC_013744	-	631	1.84105	1.5149	0.281307	0.90345	0.999568
FBtr0075912	FBgn0014343	-	3019	0.153923	0.0776736	0.986717	1	1
FBtr0332808	FBgn0037710	-	1589	0.403539	0.435249	-0.109134	0.96145	0.999568
FBtr0330717	FBgn0250906	-	1867	0.00469254	4.51848	-9.91125	0.0942	0.999568
TCONS_00939597	XLOC_189396	-	207	0	1.22211	#NAME?	0.1908	0.999568
FBtr0085078	FBgn0039470	-	2127	28.7436	19.5373	0.557008	0.2492	0.999568
FBtr0085077	FBgn0039471	-	1091	131.143	66.9108	0.970827	0.0059	0.397991
FBtr0085075	FBgn0039469	-	1396	0.157905	0.197307	-0.321381	1	1
FBtr0085074	FBgn0039467	-	1981	0.0988574	0.54211	-2.45517	0.44025	0.999568
FBtr0085073	FBgn0039467	-	2361	0.456043	0.212318	1.10294	0.7036	0.999568
FBtr0085072	FBgn0039467	-	2136	0.443421	0.28274	0.649202	0.8176	0.999568
FBtr0085071	FBgn0039467	-	2167	0	0.000648351	#NAME?	1	1
FBtr0085070	FBgn0039467	-	1886	2.61806	1.16891	1.16334	0.3115	0.999568
FBtr0309250	FBgn0030087	-	4972	14.8795	18.6527	-0.326057	0.2042	0.999568
FBtr0073119	FBgn0026189	-	3828	6.54438	7.42172	-0.181498	0.6342	0.999568
FBtr0073118	FBgn0026189	-	4763	10.0547	10.7966	-0.102709	0.7241	0.999568
FBtr0073111	FBgn0035409	-	932	13.5688	10.3954	0.38435	0.53155	0.999568
FBtr0073113	FBgn0266582	-	976	156.508	131.767	0.24824	0.1953	0.999568
FBtr0073112	FBgn0035407	-	1303	11.7588	13.7826	-0.229099	1	1
FBtr0073115	FBgn0035400	-	2510	18.166	19.9849	-0.137675	0.59285	0.999568
FBtr0073114	FBgn0035402	-	2779	57.1984	47.8336	0.25795	0.2562	0.999568
FBtr0073117	FBgn0035400	-	2973	0	0	0	1	1
FBtr0073116	FBgn0035400	-	3839	2.93631	2.64681	0.149748	0.787	0.999568
FBtr0333024	FBgn0036393	-	565	0.139575	0	inf	1	1
FBtr0333025	FBgn0036397	-	2226	0.00472889	1.31758	-8.12217	1	1
FBtr0333026	FBgn0036391	-	3713	0.459977	0.338021	0.444449	0.51385	0.999568
FBtr0333027	FBgn0036391	-	3909	0.110556	0.0844209	0.389102	1	1
FBtr0333020	FBgn0029167	-	11753	3.717	1.59698	1.21879	0.0015	0.151065
FBtr0333021	FBgn0264006	-	9829	0.0968514	0.00402027	4.59041	1	1
FBtr0333022	FBgn0036421	-	783	3.49857e-05	3.54621e-05	-0.0195137	1	1
FBtr0333023	FBgn0010105	-	2495	0.301103	0.330639	-0.134999	1	1
FBtr0333028	FBgn0036391	-	4421	0.600274	0.702725	-0.227338	0.6567	0.999568
FBtr0333029	FBgn0036391	-	3762	0.377825	0.035014	3.43171	0.1975	0.999568
FBtr0329886	FBgn0263970	-	953	0.0446957	0.208144	-2.21937	1	1
Novel000198.1	Novel000198	-	2816	0.471839	0.423045	0.157483	0.9473	0.999568
FBtr0339079	FBgn0265194	-	7419	4.07403	3.60776	0.175354	0.6316	0.999568
TCONS_00046460	XLOC_025345	-	216	0.552409	2.81634	-2.35001	0.28115	0.999568
FBtr0074468	FBgn0030873	-	1664	28.9296	28.4292	0.0251733	0.9427	0.999568
FBtr0074469	FBgn0030873	-	1884	19.0248	20.4272	-0.102611	0.7951	0.999568
FBtr0332779	FBgn0264468	-	546	0.147071	0.0443744	1.72872	1	1
FBtr0332778	FBgn0264468	-	421	0	0	0	1	1
FBtr0339078	FBgn0265194	-	7253	0.0330864	0.140016	-2.08128	1	1
FBtr0074461	FBgn0026058	-	1289	0.143235	0.115703	0.307963	1	1
FBtr0074462	FBgn0030870	-	1860	19.5863	22.8138	-0.220061	1	1
FBtr0074463	FBgn0000617	-	1124	14.2947	17.1839	-0.265583	0.528	0.999568
FBtr0074464	FBgn0030872	-	1803	20.7178	19.28	0.103764	0.79115	0.999568
FBtr0074465	FBgn0030874	-	1309	21.999	25.0049	-0.184776	0.4265	0.999568
FBtr0074466	FBgn0052557	-	2131	4.77167	3.20218	0.575441	0.05245	0.999568
FBtr0074467	FBgn0052554	-	817	3.73715	3.39626	0.137993	0.86825	0.999568
FBtr0304649	FBgn0262366	-	1529	5.5391	6.16152	-0.153636	1	1
FBtr0304642	FBgn0262361	-	377	0	0.0863381	#NAME?	1	1
FBtr0304643	FBgn0262362	-	1067	0.0618076	0.118378	-0.937539	1	1
FBtr0304640	FBgn0262359	-	468	0	0.057825	#NAME?	1	1
FBtr0304641	FBgn0262360	-	455	0	0.119253	#NAME?	1	1
FBtr0304646	FBgn0262364	-	584	1.75803	0.927937	0.92186	0.10895	0.999568
FBtr0304647	FBgn0262365	-	488	0.175915	0.21385	-0.281717	1	1
FBtr0304644	FBgn0262362	-	479	0.122163	0.192641	-0.657112	1	1
FBtr0304645	FBgn0262363	-	329	0	0.116568	#NAME?	1	1
TCONS_00218638	XLOC_066627	-	282	0.760081	0.352007	1.11055	1	1
FBtr0082865	FBgn0016672	-	1402	48.7492	52.457	-0.105755	0.5873	0.999568
FBtr0082864	FBgn0047199	-	827	47.3652	48.0431	-0.0205023	0.9458	0.999568
FBtr0082866	FBgn0015270	-	1995	25.7664	30.8565	-0.260084	0.7591	0.999568
FBtr0082861	FBgn0038160	-	494	2.25067	1.88679	0.254421	1	1
FBtr0082860	FBgn0003060	-	568	0.135753	0.155488	-0.195815	1	1
FBtr0082863	FBgn0000576	-	2478	0.260912	0.221743	0.234677	1	1
FBtr0082862	FBgn0038160	-	1122	0.0535188	0.0758532	-0.503163	1	1
Novel000214.1	Novel000214	-	1255	0.461103	0.478952	-0.0547939	0.5003	0.999568
FBtr0082869	FBgn0038195	-	1981	59.7186	57.3393	0.0586575	0.81115	0.999568
FBtr0303148	FBgn0004369	-	7109	0.479507	0.544601	-0.183647	0.82515	0.999568
FBtr0303149	FBgn0041242	-	1206	0.377011	0.328372	0.199277	0.93195	0.999568
FBtr0331445	FBgn0002673	-	2240	0.707088	0.860274	-0.282905	0.9068	0.999568
TCONS_00504191	XLOC_113388	-	209	0	1.09696	#NAME?	1	1
TCONS_00963876	XLOC_191865	-	230	0.413658	0	inf	1	1
FBtr0305599	FBgn0052644	-	2012	0.907326	2.63526	-1.53825	0.00055	0.0717115
FBtr0305598	FBgn0052642	-	1318	10.597	17.9593	-0.761077	1	1
FBtr0305591	FBgn0030425	-	2126	9.83475	8.3139	0.242364	1	1
FBtr0305593	FBgn0011826	-	4551	0.388809	0.290615	0.419952	1	1
FBtr0305592	FBgn0262739	-	7888	6.98736	5.22505	0.419303	0.32105	0.999568
FBtr0305595	FBgn0035097	-	1326	0.353471	0.230956	0.613975	0.44555	0.999568
FBtr0305596	FBgn0262679	-	879	1.22401	1.05993	0.207638	0.67155	0.999568
FBtr0087565	FBgn0261270	-	1521	121.043	136.419	-0.172524	0.36665	0.999568
FBtr0087564	FBgn0261270	-	1887	4.7627	5.83942	-0.294046	0.7406	0.999568
FBtr0087562	FBgn0033921	-	1942	41.4931	43.1929	-0.0579224	0.77295	0.999568
FBtr0087561	FBgn0033925	-	1328	23.9044	27.162	-0.18431	0.40725	0.999568
FBtr0087560	FBgn0033926	-	2371	259.191	239.425	0.114444	0.5518	0.999568
FBtr0087569	FBgn0033915	-	3198	42.4361	49.5391	-0.223274	0.25135	0.999568
FBtr0087568	FBgn0001220	-	2922	0.554272	0.485179	0.192076	0.90335	0.999568
FBtr0344288	FBgn0037960	-	1952	2.18776	1.26825	0.786611	0.5211	0.999568
FBtr0344289	FBgn0037577	-	592	0.5521	0.378126	0.546065	0.8444	0.999568
FBtr0344284	FBgn0261552	-	2889	0.356877	0.286585	0.316465	0.8917	0.999568
FBtr0344285	FBgn0038756	-	401	5.72075	3.59554	0.669995	0.73335	0.999568
FBtr0344282	FBgn0067783	-	2089	0.616744	0.649021	-0.0735941	0.96755	0.999568
FBtr0344283	FBgn0261552	-	10080	0.22868	0.447531	-0.968654	0.4725	0.999568
FBtr0344280	FBgn0067783	-	1901	2.01751	3.06605	-0.603806	0.4822	0.999568
FBtr0344281	FBgn0067783	-	1440	1.62181	2.336	-0.526431	0.6621	0.999568
Novel000224.1	Novel000224	-	780	0	0	0	1	1
TCONS_00645002	XLOC_142916	-	209	0	0	0	1	1
FBtr0085848	FBgn0039881	-	1106	4.22527	3.16919	0.414932	0.4751	0.999568
FBtr0085849	FBgn0266268	-	1407	60.5976	59.3159	0.0308426	0.8749	0.999568
FBtr0085846	FBgn0039879	-	1812	0.193969	0.244356	-0.333158	1	1
FBtr0085847	FBgn0039881	-	1145	3.21923	2.86861	0.166363	0.8274	0.999568
FBtr0085844	FBgn0005632	-	8682	7.92569	8.99522	-0.182621	0.75755	0.999568
FBtr0085845	FBgn0027620	-	5079	54.8797	64.1381	-0.224909	0.24355	0.999568
FBtr0085842	FBgn0039875	-	2280	6.95175	7.69209	-0.146	1	1
FBtr0085843	FBgn0005632	-	9194	33.1994	40.1696	-0.274947	0.3119	0.999568
FBtr0085840	FBgn0022349	-	2698	0.0872586	0.251974	-1.5299	1	1
FBtr0085841	FBgn0022349	-	2628	0.105888	0.127801	-0.271352	1	1
FBtr0089172	FBgn0011747	-	5291	16.8746	14.32	0.236816	0.67675	0.999568
FBtr0089173	FBgn0011747	-	5101	6.93658	10.7173	-0.627647	0.42345	0.999568
FBtr0089170	FBgn0052006	-	1684	0.319329	0.233749	0.450086	1	1
FBtr0089171	FBgn0011747	-	5176	105.791	99.8784	0.0829664	0.7022	0.999568
FBtr0089176	FBgn0017545	-	854	26.8706	25.7399	0.0620171	0.98575	0.999568
FBtr0089175	FBgn0017545	-	910	4811.72	4026.26	0.257115	1	1
FBtr0089178	FBgn0004859	-	4941	5.82523	4.16798	0.482965	0.05775	0.999568
FBtr0089179	FBgn0025740	-	6716	17.0721	18.4223	-0.109816	1	1
FBtr0079966	FBgn0032184	-	576	0	0.0818238	#NAME?	1	1
FBtr0079964	FBgn0051874	-	1623	0.279722	0.365068	-0.384174	0.78115	0.999568
FBtr0079962	FBgn0032189	-	1259	65.2951	70.8101	-0.116979	0.54785	0.999568
TCONS_00455282	XLOC_108436	-	200	2.40734	0	inf	0.22235	0.999568
FBtr0079960	FBgn0032191	-	2205	54.8967	59.1669	-0.108071	0.5696	0.999568
FBtr0079969	FBgn0032181	-	1182	0.942361	0.929253	0.0202086	0.9895	0.999568
FBtr0073843	FBgn0030514	-	3113	38.721	44.0851	-0.187176	0.32865	0.999568
FBtr0073842	FBgn0001087	-	3853	22.3822	26.7745	-0.258512	0.2137	0.999568
FBtr0073841	FBgn0001612	-	3571	31.6858	37.0049	-0.223879	0.63155	0.999568
FBtr0073840	FBgn0030520	-	2368	109.801	109.472	0.00433012	0.9913	0.999568
FBtr0073847	FBgn0030506	-	3040	14.9558	17.0393	-0.188166	0.3591	0.999568
TCONS_00729585	XLOC_174896	-	245	1.20435	0	inf	1	1
TCONS_00967571	XLOC_198169	-	204	1.40608	0.62376	1.17261	1	1
FBtr0073845	FBgn0030512	-	4321	30.1478	33.3653	-0.146296	0.4844	0.999568
TCONS_00956585	XLOC_218163	-	205	1.44938	0	inf	1	1
FBtr0073844	FBgn0030512	-	4375	3.28111	2.96569	0.145814	0.838	0.999568
FBtr0084718	FBgn0039251	-	1870	18.393	21.3415	-0.214499	0.5863	0.999568
FBtr0084715	FBgn0039249	-	2980	1.86335	1.17937	0.659887	0.2248	0.999568
FBtr0084716	FBgn0039250	-	2511	20.4058	22.9962	-0.172415	0.58285	0.999568
FBtr0084711	FBgn0043799	-	1699	1.8651	1.42081	0.392544	0.8835	0.999568
FBtr0084710	FBgn0039241	-	2272	91.9071	84.5345	0.120635	0.6406	0.999568
FBtr0084713	FBgn0039246	-	1933	0.119545	0.182222	-0.608148	1	1
FBtr0084712	FBgn0039244	-	2038	3.89784	3.28522	0.246683	0.41475	0.999568
FBtr0340455	FBgn0263395	-	5041	0.321243	0.355328	-0.145486	0.9261	0.999568
FBtr0340454	FBgn0263395	-	4330	0	0	0	1	1
FBtr0345627	FBgn0028737	-	960	22.3377	20.0574	0.155346	0.9027	0.999568
FBtr0082006	FBgn0040534	-	370	151.203	147.131	0.0393809	0.864	0.999568
FBtr0082005	FBgn0264075	-	3108	3.7753	4.66003	-0.303749	0.4951	0.999568
FBtr0082004	FBgn0002932	-	3989	3.53224	3.56964	-0.0151952	0.97795	0.999568
FBtr0082003	FBgn0002932	-	3992	0.000779027	0.00364497	-2.22616	1	1
FBtr0082002	FBgn0002932	-	3753	0.452882	2.07248	-2.19415	0.14285	0.999568
FBtr0082001	FBgn0002932	-	3756	0	0.00134122	#NAME?	1	1
FBtr0345620	FBgn0034974	-	2931	0.159154	0.216266	-0.442386	1	1
FBtr0340459	FBgn0034417	-	2707	1.40854	1.00098	0.492792	0.46015	0.999568
FBtr0345629	FBgn0033476	-	3556	0	0.0515515	#NAME?	1	1
FBtr0345628	FBgn0034354	-	943	3.86674	4.56397	-0.23917	0.70995	0.999568
FBtr0342938	FBgn0265956	-	764	0.117486	0.0740801	0.665331	1	1
FBtr0340458	FBgn0034417	-	2380	0.495655	0.111089	2.15762	0.25285	0.999568
FBtr0333842	FBgn0036279	-	4762	0.783161	0.443964	0.818866	0.48595	0.999568
FBtr0342932	FBgn0265957	-	900	0	0	0	1	1
FBtr0342933	FBgn0265957	-	1051	0.443861	0.554122	-0.320096	0.90325	0.999568
FBtr0342930	FBgn0265952	-	931	0.140847	0.0860044	0.711642	1	1
FBtr0342931	FBgn0031692	-	688	0	0	0	1	1
FBtr0342936	FBgn0016076	-	3890	0.61847	0.413839	0.579636	0.6527	0.999568
FBtr0342937	FBgn0265956	-	1161	0.130041	0.119771	0.118686	1	1
FBtr0342934	FBgn0031696	-	4091	7.27816	8.32234	-0.193416	0.60655	0.999568
FBtr0342935	FBgn0265955	-	514	0	0	0	1	1
FBtr0301458	FBgn0032940	-	3928	0	0.744074	0	1	1
FBtr0301459	FBgn0032940	-	4837	0	0.447116	0	1	1
FBtr0301454	FBgn0026401	-	6604	11.197	13.2371	-0.241481	0.6508	0.999568
FBtr0301455	FBgn0026401	-	6639	11.5187	12.1099	-0.0722087	0.8979	0.999568
FBtr0301456	FBgn0026401	-	6611	10.8777	11.9165	-0.131576	0.81085	0.999568
FBtr0301457	FBgn0032940	-	4834	0	11.2966	-0.0570699	1	1
FBtr0301450	FBgn0030505	-	5243	8.73196	10.0616	-0.204476	0.41325	0.999568
FBtr0301451	FBgn0030505	-	6009	0.337018	0.383492	-0.186372	0.88945	0.999568
FBtr0301452	FBgn0026787	-	2551	30.4035	31.1348	-0.0342938	0.90435	0.999568
FBtr0306102	FBgn0260439	-	2588	0	0	0	1	1
FBtr0306101	FBgn0051374	-	3272	2.30488	1.80831	0.35005	0.54795	0.999568
FBtr0306100	FBgn0051374	-	2146	0	0	0	1	1
FBtr0306107	FBgn0004449	-	12169	1.82242	1.29773	0.489869	0.28775	0.999568
FBtr0306106	FBgn0004436	-	1142	66.2189	63.0102	0.0716586	1	1
FBtr0306105	FBgn0265266	-	467	0.127499	0.230152	-0.852099	1	1
FBtr0306104	FBgn0039690	-	897	1.63144	1.3476	0.275744	0.8192	0.999568
FBtr0346983	FBgn0267571	-	3391	0.221373	0.0482153	2.19892	1	1
TCONS_00797550	XLOC_163585	-	223	0	1.62375	#NAME?	1	1
FBtr0333840	FBgn0036279	-	4044	0.113813	0.356836	-1.64859	1	1
FBtr0331650	FBgn0085201	-	303	2.07959	3.25487	-0.646304	0.77845	0.999568
FBtr0346982	FBgn0267571	-	3055	6.09568e-05	0.178711	-11.5176	1	1
FBtr0302374	FBgn0028371	-	5339	0.397258	9.97837e-05	11.959	0.4113	0.999568
FBtr0302375	FBgn0260748	-	4563	1.20464	0.944861	0.350423	0.75505	0.999568
FBtr0302376	FBgn0260748	-	4573	0.144428	0.0827418	0.803657	1	1
FBtr0302377	FBgn0260748	-	1967	3.25101	2.25192	0.529736	0.60795	0.999568
FBtr0302370	FBgn0015019	-	2086	11.1447	9.61141	0.213533	0.80155	0.999568
FBtr0302371	FBgn0015019	-	2071	3.45792	3.71556	-0.103676	0.9449	0.999568
FBtr0302372	FBgn0054049	-	967	0.0671509	0.0817544	-0.28389	1	1
FBtr0302378	FBgn0000229	-	1797	0.500501	0.557315	-0.15512	0.92995	0.999568
FBtr0302379	FBgn0038083	-	1667	2.35222	3.79616	-0.690519	0.04375	0.999568
FBtr0332101	FBgn0000541	-	8652	1.83069	2.34725	-0.358582	0.733	0.999568
FBtr0332005	FBgn0264344	-	505	0.566642	0.452161	0.325601	0.79865	0.999568
FBtr0332102	FBgn0000541	-	9296	0.99548	1.09752	-0.140789	0.92005	0.999568
FBtr0332004	FBgn0264344	-	590	0	0	0	1	1
FBtr0070178	FBgn0003638	-	4836	0.691913	0.894386	-0.370308	0.85065	0.999568
FBtr0070179	FBgn0040398	-	1107	166.091	118.995	0.481065	0.0598	0.999568
FBtr0332007	FBgn0264341	-	789	0.618852	0.424094	0.545212	0.403	0.999568
FBtr0070172	FBgn0029552	-	590	0.0854747	0.278735	-1.70533	1	1
FBtr0070173	FBgn0040337	-	1412	20.8844	20.4752	0.0285506	0.9648	0.999568
FBtr0070170	FBgn0040347	-	2155	36.5255	42.7746	-0.227851	0.26455	0.999568
FBtr0070171	FBgn0042146	-	667	0.324431	0.499314	-0.622038	0.4344	0.999568
FBtr0070176	FBgn0003638	-	3199	13.5888	15.6194	-0.200925	0.68815	0.999568
FBtr0070177	FBgn0003638	-	4056	0.626138	0.678889	-0.116695	0.96485	0.999568
FBtr0070174	FBgn0053082	-	796	2.80512	2.01688	0.475939	1	1
FBtr0070175	FBgn0014903	-	1358	43.6491	28.9496	0.592412	0.2647	0.999568
FBtr0303601	FBgn0261928	-	9928	3.50043e-05	3.7673e-05	-0.105998	1	1
FBtr0078369	FBgn0028663	-	699	272.969	217.154	0.330017	1	1
FBtr0078368	FBgn0015283	-	1422	4.79908	3.38084	0.505373	0.7157	0.999568
FBtr0078366	FBgn0037094	-	3810	5.36962	4.35641	0.301679	0.6902	0.999568
FBtr0078365	FBgn0037094	-	3143	1.78392	2.1794	-0.288885	0.82975	0.999568
FBtr0078364	FBgn0037094	-	3070	0.518459	0.522167	-0.0102814	0.9901	0.999568
FBtr0078363	FBgn0037094	-	3041	12.8399	12.5741	0.0301788	0.9595	0.999568
FBtr0078362	FBgn0037094	-	3348	14.7144	16.5766	-0.171918	0.70465	0.999568
FBtr0078361	FBgn0037094	-	3370	10.0236	10.8249	-0.110961	0.8433	0.999568
FBtr0343197	FBgn0034841	-	1528	0.107326	0.124586	-0.215141	1	1
FBtr0343195	FBgn0034833	-	1099	0	0	0	1	1
FBtr0343194	FBgn0266009	-	677	0.109444	0.195889	-0.839845	1	1
FBtr0345585	FBgn0005626	-	3806	0.1014	0.0465389	1.12355	1	1
FBtr0343193	FBgn0266008	-	977	0.0879597	0.181731	-1.04689	1	1
FBtr0343192	FBgn0021979	-	1259	3.19656	0.978091	1.70848	0.31925	0.999568
FBtr0343191	FBgn0021979	-	1259	6.79383	4.05609	0.744137	0.44155	0.999568
FBtr0072423	FBgn0035073	-	3322	17.8587	17.4612	0.0324712	0.88005	0.999568
FBtr0333845	FBgn0036876	-	1592	4.00747	2.25256	0.831128	0.11245	0.999568
FBtr0079181	FBgn0031763	-	832	0.0547476	0.0989871	-0.854444	1	1
FBtr0079182	FBgn0051643	-	2938	7.98541	5.84273	0.450725	0.54225	0.999568
FBtr0079183	FBgn0031768	-	1700	6.92342	8.02613	-0.213219	0.78245	0.999568
FBtr0079184	FBgn0031768	-	1612	8.48458	8.29096	0.0333032	0.9651	0.999568
FBtr0079185	FBgn0031769	-	1832	6.9826	14.297	-1.03387	1	1
FBtr0079186	FBgn0031769	-	1978	4.57315	4.44535	0.0408894	0.9696	0.999568
FBtr0079187	FBgn0031770	-	3379	0.547569	0.432986	0.338721	0.43865	0.999568
FBtr0079188	FBgn0031772	-	631	1.24722	1.13289	0.138709	0.9524	0.999568
FBtr0079189	FBgn0031774	-	1377	0.352221	0.371531	-0.0770018	0.9582	0.999568
FBtr0303421	FBgn0004910	-	880	2.2145	1.17686	0.912037	0.5126	0.999568
FBtr0303420	FBgn0004910	-	2552	1.82988	1.61939	0.176296	0.7902	0.999568
FBtr0303427	FBgn0051044	-	4439	0	0	0	1	1
FBtr0303426	FBgn0051044	-	1768	0	0	0	1	1
FBtr0303425	FBgn0053483	-	728	0	2.95255e-06	#NAME?	1	1
FBtr0347418	FBgn0023083	-	3373	0.110191	0.058093	0.923566	1	1
FBtr0347412	FBgn0039487	-	2449	0.82469	1.74059	-1.07765	1	1
FBtr0347413	FBgn0267592	-	4002	0	0	0	1	1
FBtr0347410	FBgn0032820	-	1202	35.3773	32.6683	0.114931	0.75105	0.999568
FBtr0347411	FBgn0085339	-	701	0	0.100452	#NAME?	1	1
FBtr0347416	FBgn0000808	-	2234	0.646489	0.842485	-0.382026	0.67705	0.999568
FBtr0347417	FBgn0023083	-	3464	2.90133	1.44076	1.00988	0.21645	0.999568
FBtr0347414	FBgn0264953	-	10101	0.222967	0.3771	-0.758115	0.54375	0.999568
FBtr0347415	FBgn0264953	-	10506	0	0.00178415	#NAME?	1	1
TCONS_00525828	XLOC_120586	-	203	0	1.28158	#NAME?	1	1
FBtr0078588	FBgn0037406	-	1161	0.072306	0.0816453	-0.175255	1	1
FBtr0078582	FBgn0027339	-	13458	0	0	0	1	1
FBtr0078587	FBgn0037405	-	2302	19.3925	33.9108	-0.806244	0.00015	0.0269878
FBtr0308921	FBgn0051386	-	2763	0.06772	0.0617657	0.132775	1	1
FBtr0078585	FBgn0037402	-	694	5.75946e-06	0.0313239	-12.409	1	1
FBtr0078584	FBgn0046878	-	899	1.67625	1.7463	-0.0590625	0.92095	0.999568
FBtr0330149	FBgn0263108	-	3336	1.92754	2.02715	-0.0726951	0.94905	0.999568
FBtr0076639	FBgn0052351	-	2093	0.176376	0.150036	0.233352	1	1
FBtr0076638	FBgn0035915	-	2121	0.171708	0.172635	-0.00776912	1	1
FBtr0076637	FBgn0035914	-	3611	0.104505	0.11367	-0.121274	1	1
FBtr0076633	FBgn0017579	-	619	2797.91	2293.5	0.286797	0.1537	0.999568
FBtr0330147	FBgn0262139	-	4570	0	0.0229272	#NAME?	1	1
FBtr0330144	FBgn0261929	-	4014	0.0115405	0.03532	-1.61378	1	1
FBtr0330145	FBgn0261934	-	10224	0.031028	0.0901032	-1.53801	1	1
FBtr0081914	FBgn0037622	-	3092	21.6708	24.5326	-0.17895	0.37155	0.999568
FBtr0077588	FBgn0031526	-	973	0.697283	0.730392	-0.0669265	0.8983	0.999568
FBtr0077589	FBgn0016698	-	1393	26.4624	26.872	-0.0221602	0.92045	0.999568
FBtr0077586	FBgn0031522	-	1631	12.5488	9.74024	0.365524	0.2969	0.999568
FBtr0077587	FBgn0031523	-	1565	18.9066	15.6539	0.272368	0.33635	0.999568
FBtr0077584	FBgn0053281	-	1594	3.89056	2.52952	0.621112	0.0677	0.999568
FBtr0077583	FBgn0031520	-	1835	1.48835	1.60099	-0.105251	0.86355	0.999568
FBtr0077580	FBgn0031517	-	1646	28.1698	23.1565	0.282732	0.3166	0.999568
FBtr0081910	FBgn0037616	-	1615	0.0192834	0.0183255	0.0735051	1	1
FBtr0081911	FBgn0037617	-	1217	6.40004	6.33254	0.0152971	1	1
FBtr0113391	FBgn0051116	-	3613	1.96653	1.26773	0.633413	0.29345	0.999568
FBtr0081912	FBgn0037618	-	1141	0.344781	0.183922	0.906586	1	1
FBtr0339339	FBgn0265305	-	436	0	0.129667	#NAME?	1	1
FBtr0076181	FBgn0036155	-	2020	0.384212	0.193255	0.991399	0.53165	0.999568
FBtr0076183	FBgn0036152	-	2792	8.49097	9.47016	-0.157459	1	1
FBtr0076182	FBgn0036154	-	1058	0.103322	8.97426e-05	10.1691	1	1
FBtr0076185	FBgn0036150	-	2443	0.11549	0.102002	0.179175	1	1
FBtr0076187	FBgn0036147	-	2630	45.9317	36.9319	0.314624	0.1237	0.999568
FBtr0076186	FBgn0061469	-	3674	16.549	18.2126	-0.138196	0.49575	0.999568
FBtr0076189	FBgn0036144	-	3755	0.000177005	0.000173625	0.027818	1	1
FBtr0076188	FBgn0036147	-	2544	3.70667	2.84584	0.381271	0.64185	0.999568
FBtr0346018	FBgn0030968	-	1183	1.98233	1.50319	0.399174	0.7207	0.999568
FBtr0339336	FBgn0033327	-	1649	1.02327	0.653479	0.646975	0.2882	0.999568
FBtr0343917	FBgn0266250	-	986	0.112242	0.0200735	2.48325	1	1
FBtr0343916	FBgn0266249	-	1475	0.149768	0.222139	-0.568734	1	1
FBtr0343915	FBgn0266248	-	1946	0.0804585	0.0631863	0.348632	1	1
FBtr0343914	FBgn0266247	-	422	0.0785055	0	inf	1	1
[truncated: 32,269 more rows]

## Sheet: 42 day(DR)vs 42 day(fully fed)
transcript_id	gene_id	gene_name	length	42_day_DR_FPKM	42_day_fully fed_FPKM	log2(foldchange)	pvalue	qvalue
FBtr0333190	FBgn0037664	-	1343	0.987516	0.917161	0.106628	0.94815	0.999568
FBtr0332112	FBgn0040308	-	1007	0	0	0	1	1
FBtr0333191	FBgn0038181	-	4111	0	0.164364	#NAME?	1	1
FBtr0077629	FBgn0031478	-	1785	63.9489	66.5589	-0.0577126	0.78255	0.999568
FBtr0077628	FBgn0031476	-	998	1.46113	1.50207	-0.0398726	0.9774	0.999568
TCONS_00244019	XLOC_068108	-	219	1.4753	0	inf	0.2157	0.999568
FBtr0077623	FBgn0015521	-	619	6.80895	4.8434	0.491411	0.8902	0.999568
FBtr0077622	FBgn0015521	-	415	1.08784	3.01952	-1.47285	0.55925	0.999568
FBtr0077621	FBgn0015521	-	391	1827.68	2019.38	-0.143902	1	1
FBtr0077627	FBgn0031474	-	2889	2.76183	1.80384	0.614555	0.443	0.999568
FBtr0077626	FBgn0031474	-	2998	25.6285	27.451	-0.0991121	0.6436	0.999568
FBtr0077625	FBgn0031474	-	3088	3.87912	3.29287	0.236383	0.68725	0.999568
FBtr0072052	FBgn0034834	-	1410	0.156737	0.0877635	0.836652	1	1
FBtr0072051	FBgn0040063	-	788	0.0816277	0.0499466	0.708673	1	1
FBtr0072050	FBgn0040063	-	1249	0.0358396	0.0574514	-0.680788	1	1
FBtr0072057	FBgn0034870	-	870	0.995374	0.418548	1.24985	0.04535	0.999568
FBtr0072056	FBgn0034869	-	1052	0.1208	0.104089	0.214796	1	1
TCONS_00008305	XLOC_005893	-	201	1.38221	0	inf	1	1
FBtr0072059	FBgn0041234	-	1221	0.370252	0.346194	0.0969283	1	1
FBtr0072058	FBgn0261786	-	3845	27.7939	32.781	-0.238088	0.237	0.999568
FBtr0088225	FBgn0029134	-	1139	263.412	297.489	-0.175512	0.359	0.999568
FBtr0088224	FBgn0029134	-	1076	6.74798	6.3734	0.0823926	0.9505	0.999568
FBtr0088227	FBgn0033557	-	3220	25.7107	27.2033	-0.0814145	1	1
FBtr0088226	FBgn0033555	-	724	52.3693	63.256	-0.27248	0.21875	0.999568
FBtr0088221	FBgn0033547	-	1200	0.49483	0.254789	0.957631	0.7316	0.999568
FBtr0088223	FBgn0033551	-	1523	50.4159	55.0357	-0.12649	0.5272	0.999568
FBtr0088222	FBgn0033549	-	1138	36.434	45.983	-0.335813	0.1786	0.999568
FBtr0088228	FBgn0263510	-	1549	43.8198	41.3274	0.0844863	0.67225	0.999568
TCONS_00091941	XLOC_032088	-	222	0	0.483254	#NAME?	1	1
FBtr0308321	FBgn0023531	-	6762	1.70754	1.63627	0.0615094	0.90705	0.999568
FBtr0308320	FBgn0029587	-	3151	0.499238	0.437498	0.190453	0.8957	0.999568
FBtr0308323	FBgn0023531	-	6713	0.0223991	0.0501562	-1.16299	1	1
FBtr0308322	FBgn0023531	-	3799	0.255307	0.176205	0.53498	1	1
FBtr0308325	FBgn0002873	-	7938	14.3587	17.8271	-0.312151	0.2798	0.999568
FBtr0308324	FBgn0023531	-	6806	0.16526	0	inf	1	1
FBtr0308327	FBgn0002873	-	8457	0.000160771	0	inf	1	1
FBtr0308326	FBgn0002873	-	6286	0.113398	0.182203	-0.684151	1	1
FBtr0308329	FBgn0002873	-	7097	0.358446	0.496486	-0.469997	0.82975	0.999568
FBtr0308328	FBgn0002873	-	8643	7.43313	9.39056	-0.337241	0.37275	0.999568
TCONS_00960819	XLOC_188047	-	204	0	0.690446	#NAME?	1	1
TCONS_00212738	XLOC_057649	-	202	1.34532	0.729833	0.882313	1	1
TCONS_00003463	XLOC_001635	-	464	1.07689	0.897329	0.263157	0.69175	0.999568
FBtr0085138	FBgn0003495	-	2050	4.89477	7.39071	-0.59447	0.1953	0.999568
FBtr0085139	FBgn0003495	-	1909	1.69917	2.94215	-0.792041	0.3585	0.999568
FBtr0085132	FBgn0039487	-	2635	9.01361	9.80158	-0.120908	0.6479	0.999568
FBtr0085133	FBgn0039486	-	1130	7.54223	4.86756	0.631792	0.0449	0.999568
FBtr0085130	FBgn0039491	-	2897	0.262881	0.202052	0.379685	1	1
FBtr0085131	FBgn0039488	-	1556	23.9703	28.6632	-0.257956	0.23325	0.999568
FBtr0085136	FBgn0039480	-	1514	0.117396	0.00167915	6.12751	1	1
FBtr0085137	FBgn0003495	-	2128	2.98882	2.86771	0.0596772	0.94345	0.999568
FBtr0085135	FBgn0039481	-	1054	0.904605	0.721303	0.326682	0.5248	0.999568
FBtr0332234	FBgn0262475	-	4146	0.176826	0.069593	1.34531	1	1
TCONS_00952124	XLOC_210443	-	214	3.10791	0	inf	0.2365	0.999568
Novel000069.1	Novel000069	-	212	0	0.56227	#NAME?	1	1
FBtr0333107	FBgn0260442	-	9521	0.355166	0	inf	0.1002	0.999568
FBtr0073015	FBgn0035372	-	1296	37.9819	41.4411	-0.125751	0.54345	0.999568
FBtr0073016	FBgn0035371	-	3020	19.653	20.7169	-0.0760586	0.70685	0.999568
FBtr0333104	FBgn0264510	-	1258	0.878968	0.585295	0.586646	0.82395	0.999568
FBtr0073010	FBgn0035380	-	1631	0.132536	0.133892	-0.0146926	1	1
FBtr0073011	FBgn0035379	-	1996	0.481402	0.304435	0.661106	0.197	0.999568
FBtr0309056	FBgn0033958	-	4422	1.67391	0.721423	1.2143	0.02685	0.971346
FBtr0309057	FBgn0263376	-	1665	0.141017	0.0608134	1.21341	1	1
FBtr0333109	FBgn0260442	-	9722	2.9192	0.972289	1.58611	0.1614	0.999568
FBtr0333108	FBgn0260442	-	9265	0.478042	0.564298	-0.23932	0.9165	0.999568
FBtr0303755	FBgn0038508	-	710	0.500647	0.241291	1.05302	0.20095	0.999568
FBtr0303757	FBgn0027596	-	5340	3.83782	2.57663	0.5748	0.1537	0.999568
FBtr0303756	FBgn0027596	-	4522	2.02871	1.62849	0.317028	0.5745	0.999568
FBtr0303751	FBgn0261934	-	3009	5.18741	7.09494	-0.451777	0.27835	0.999568
FBtr0303750	FBgn0261934	-	11586	0.930532	0.81124	0.197928	0.7353	0.999568
FBtr0303759	FBgn0033984	-	3841	18.6512	22.8088	-0.290324	0.14835	0.999568
FBtr0303758	FBgn0027596	-	1942	0.481876	0.426296	0.176806	0.9219	0.999568
FBtr0332110	FBgn0024806	-	5914	0	0.291899	#NAME?	1	1
FBtr0345678	FBgn0004055	-	4114	0.168715	0.119858	0.493258	1	1
FBtr0110942	FBgn0028931	-	2184	4.37024	5.2264	-0.258106	0.3712	0.999568
FBtr0110941	FBgn0028539	-	5141	29.1106	32.5634	-0.161709	0.5192	0.999568
FBtr0110947	FBgn0083973	-	892	0.00956873	0.00899925	0.0885233	1	1
FBtr0110944	FBgn0083972	-	706	7.64263	5.50675	0.472868	0.7389	0.999568
FBtr0345670	FBgn0266861	-	700	0.13582	0.140026	-0.0439912	1	1
FBtr0081259	FBgn0032814	-	2062	14.3492	16.865	-0.233061	0.3026	0.999568
FBtr0081258	FBgn0027949	-	1366	46.5117	58.2626	-0.324975	0.13425	0.999568
FBtr0345671	FBgn0266862	-	641	0.0384181	0.119891	-1.64186	1	1
FBtr0081253	FBgn0003231	-	2305	221.251	183.232	0.272013	1	1
FBtr0081252	FBgn0032804	-	703	0.0337492	0	inf	1	1
FBtr0081251	FBgn0032803	-	1316	1.14266	1.15568	-0.0163399	0.9775	0.999568
FBtr0081250	FBgn0051697	-	657	0.557475	0.648872	-0.219028	0.9217	0.999568
FBtr0081257	FBgn0032810	-	1146	1.52651	1.06653	0.51731	0.55315	0.999568
FBtr0081256	FBgn0032809	-	910	0.89178	0.466249	0.935588	0.11345	0.999568
FBtr0081254	FBgn0041180	-	4694	38.7854	36.3257	0.0945254	0.67595	0.999568
FBtr0345673	FBgn0001269	-	4776	0.131682	0.0990871	0.410292	1	1
FBtr0345674	FBgn0050489	-	4482	0.436939	0.409939	0.0920218	0.914	0.999568
FBtr0345675	FBgn0040765	-	3037	0.180748	0.0429015	2.07488	1	1
FBtr0074549	FBgn0030900	-	920	0.167075	0.171828	-0.0404674	1	1
FBtr0345676	FBgn0034470	-	922	1.42082	0.97718	0.540032	0.83365	0.999568
FBtr0334601	FBgn0039186	-	2592	0.925647	1.65255	-0.836157	0.479	0.999568
FBtr0074540	FBgn0030883	-	843	29.0539	33.9952	-0.2266	0.3379	0.999568
FBtr0074546	FBgn0083228	-	2397	0.321929	0.294024	0.130808	1	1
FBtr0074545	FBgn0030897	-	5686	0.0413067	0.000265903	7.27933	1	1
FBtr0074544	FBgn0030877	-	2289	28.012	32.707	-0.223552	0.2891	0.999568
TCONS_00090156	XLOC_028051	-	289	1.03851	1.43757	-0.469112	0.7575	0.999568
TCONS_00090155	XLOC_028049	-	221	0.471133	1.93887	-2.04101	1	1
FBtr0333173	FBgn0035094	-	2668	4.16611	3.25985	0.353895	0.6537	0.999568
FBtr0334609	FBgn0038975	-	6583	0.112152	0.342106	-1.60899	1	1
FBtr0086860	FBgn0034264	-	1402	0.917725	0.499816	0.876664	0.6821	0.999568
TCONS_00264388	XLOC_066405	-	249	0.825642	1.39973	-0.761561	0.59195	0.999568
TCONS_00218199	XLOC_065917	-	320	0.265482	0	inf	1	1
TCONS_00949096	XLOC_205480	-	743	3.71166	1.68962	1.13536	0.13905	0.999568
FBtr0300518	FBgn0267337	-	5014	0.188216	0.105354	0.837138	1	1
FBtr0305494	FBgn0029858	-	2809	0.119354	0.139473	-0.224737	1	1
FBtr0305495	FBgn0028685	-	1465	118.174	129.661	-0.133833	0.51135	0.999568
FBtr0305496	FBgn0262631	-	710	0.641486	0.945461	-0.5596	1	1
FBtr0305497	FBgn0026086	-	2042	18.1574	23.3524	-0.363015	0.38645	0.999568
FBtr0305490	FBgn0040510	-	3539	0.000402532	0.000426504	-0.083456	1	1
FBtr0305491	FBgn0040510	-	3549	0.000121436	0.000114769	0.0814643	1	1
TCONS_00485049	XLOC_118356	-	200	0.710374	0	inf	1	1
FBtr0305498	FBgn0026086	-	2839	1.4414	2.37625	-0.721218	0.5198	0.999568
FBtr0305499	FBgn0026086	-	6954	1.71588	0.91667	0.904472	0.3088	0.999568
FBtr0112516	FBgn0085346	-	1168	38.8082	41.0544	-0.0811731	0.72485	0.999568
FBtr0112514	FBgn0085345	-	907	0.29145	0.125157	1.21951	1	1
TCONS_00307364	XLOC_047731	-	1370	0.248716	0.417621	-0.747692	0.34565	0.999568
FBtr0112519	FBgn0016053	-	686	581.357	726.71	-0.321955	0.09835	0.999568
FBtr0332116	FBgn0052311	-	9761	1.93033	1.08743	0.827929	0.13735	0.999568
FBtr0305148	FBgn0031155	-	1226	0.302392	0.151768	0.994549	1	1
FBtr0305149	FBgn0262735	-	3468	5.32143	6.83179	-0.360448	0.4863	0.999568
FBtr0305147	FBgn0266848	-	3283	1.78058	1.4839	0.262952	0.81675	0.999568
FBtr0305145	FBgn0053196	-	26263	0.577049	0.265702	1.11889	0.13635	0.999568
FBtr0305142	FBgn0053196	-	48068	0.386175	0.201968	0.935132	0.11645	0.999568
FBtr0305141	FBgn0053196	-	47440	0	0	0	1	1
FBtr0309872	FBgn0052707	-	2605	6.23013	8.75348	-0.490595	0.17825	0.999568
FBtr0309873	FBgn0004646	-	2158	3.27436	2.46062	0.412194	0.5012	0.999568
FBtr0309871	FBgn0030082	-	1493	4.50345	4.18797	0.104778	0.89525	0.999568
FBtr0309874	FBgn0004646	-	2794	0.0151195	0.0204295	-0.434249	1	1
FBtr0309875	FBgn0004646	-	1689	0	0	0	1	1
FBtr0085961	FBgn0032987	-	614	3790.77	4062.03	-0.0997096	1	1
FBtr0309878	FBgn0030440	-	717	0.197313	0	inf	1	1
FBtr0309879	FBgn0033447	-	3569	0.168276	0.0758859	1.14892	1	1
FBtr0085964	FBgn0032979	-	2636	80.3327	92.4398	-0.202526	0.427	0.999568
FBtr0085966	FBgn0033047	-	1802	11.7025	12.3733	-0.0804145	1	1
FBtr0300516	FBgn0259170	-	3808	3.24562	3.72188	-0.197534	0.74725	0.999568
TCONS_00038793	XLOC_014300	-	200	1.58322	0.772877	1.03455	1	1
FBtr0300514	FBgn0259170	-	3961	4.11065	3.05353	0.428886	0.48235	0.999568
FBtr0300515	FBgn0259170	-	3853	1.46709	1.29694	0.177848	0.86405	0.999568
FBtr0300512	FBgn0259170	-	3710	0.239299	0	inf	1	1
FBtr0300513	FBgn0259170	-	3785	3.11144	3.51956	-0.177813	0.779	0.999568
FBtr0300510	FBgn0259168	-	4228	0.48216	0.347929	0.470721	0.8617	0.999568
FBtr0300511	FBgn0259170	-	4132	6.60388	7.57542	-0.198011	0.6248	0.999568
FBtr0089636	FBgn0031883	-	2457	13.5376	13.0467	0.0532889	0.9467	0.999568
FBtr0089631	FBgn0016034	-	1839	0.48579	0.784327	-0.691121	0.7406	0.999568
FBtr0089630	FBgn0034289	-	1991	73.9651	76.8592	-0.0553727	0.7757	0.999568
FBtr0089633	FBgn0016034	-	1759	3.02473	2.29101	0.400821	0.67945	0.999568
FBtr0089632	FBgn0016034	-	1830	30.1682	36.4723	-0.27377	1	1
FBtr0301645	FBgn0035504	-	2732	0.396601	0.168828	1.23213	0.51305	0.999568
FBtr0301644	FBgn0025790	-	1930	0.439934	0.162304	1.43859	0.58715	0.999568
FBtr0301647	FBgn0032707	-	2611	0	3.39005e-05	#NAME?	1	1
FBtr0083490	FBgn0038533	-	1134	25.8649	29.4569	-0.187606	0.63535	0.999568
FBtr0301640	FBgn0041707	-	1148	0.253955	0.237565	0.0962455	1	1
FBtr0301643	FBgn0025790	-	2159	6.97744	6.2657	0.155221	0.72105	0.999568
FBtr0083498	FBgn0038529	-	914	0.0716673	0.0986143	-0.460482	1	1
FBtr0301649	FBgn0037502	-	1878	0.0308431	0.0417184	-0.435733	1	1
FBtr0301648	FBgn0034921	-	1225	1.09195	7.31543	-2.74403	1	1
FBtr0079883	FBgn0032166	-	4136	1.10133	0.919411	0.260466	0.7954	0.999568
FBtr0079885	FBgn0032170	-	2323	0	0	0	1	1
FBtr0079884	FBgn0032169	-	1602	21.0319	23.4187	-0.155084	1	1
FBtr0079887	FBgn0032170	-	2224	27.0664	24.7672	0.128071	0.75585	0.999568
FBtr0079886	FBgn0032170	-	2250	7.79781	8.17755	-0.0686002	0.9242	0.999568
FBtr0079889	FBgn0015664	-	2872	22.2851	21.6531	0.0415025	0.88945	0.999568
FBtr0079888	FBgn0011272	-	791	56.1766	62.108	-0.14481	0.88855	0.999568
TCONS_00267125	XLOC_071472	-	213	0	0	0	1	1
FBtr0333930	FBgn0038858	-	1601	1.14152	1.67954	-0.557114	0.536	0.999568
FBtr0091914	FBgn0053910	-	595	0	0	0	1	1
FBtr0091916	FBgn0053912	-	498	0.0563097	0	inf	1	1
FBtr0091911	FBgn0053907	-	412	2.26526	3.24939	-0.52049	0.3356	0.999568
FBtr0091910	FBgn0053906	-	595	0	0	0	1	1
FBtr0091913	FBgn0053909	-	413	0	0	0	1	1
FBtr0091912	FBgn0053908	-	595	0	0	0	1	1
FBtr0100187	FBgn0000056	-	2024	0	0	0	1	1
FBtr0100186	FBgn0035538	-	3834	0.124038	0.0117792	3.39646	1	1
FBtr0100185	FBgn0035538	-	4288	0.736594	0.324513	1.18259	0.0165	0.738684
FBtr0100184	FBgn0027339	-	4749	0	0	0	1	1
FBtr0100183	FBgn0004907	-	1753	238.523	232.034	0.0397943	1	1
FBtr0100182	FBgn0004907	-	974	138.841	134.351	0.0474274	1	1
FBtr0100188	FBgn0045500	-	1161	0.0892172	0.0367595	1.27921	1	1
FBtr0346527	FBgn0035667	-	951	0.379434	0	inf	0.2023	0.999568
FBtr0084618	FBgn0039200	-	750	0.683172	0.699682	-0.0344496	0.95805	0.999568
FBtr0084611	FBgn0053340	-	1152	0.198742	0.111311	0.836306	1	1
FBtr0084613	FBgn0053341	-	946	0.229483	0.047219	2.28095	1	1
FBtr0084614	FBgn0039194	-	1047	0.24301	0.102424	1.24646	1	1
FBtr0084617	FBgn0039199	-	1139	0.073525	0.0386342	0.928355	1	1
FBtr0082722	FBgn0038105	-	1462	14.4645	17.6646	-0.288352	0.2305	0.999568
FBtr0082723	FBgn0041710	-	1439	2.84136	2.54028	0.161596	0.89185	0.999568
FBtr0345500	FBgn0034763	-	2242	2.65475	1.818	0.546225	0.4142	0.999568
FBtr0082721	FBgn0038107	-	707	80.2296	93.8954	-0.22692	1	1
FBtr0082726	FBgn0038098	-	2913	0.0385877	0.316471	-3.03586	1	1
FBtr0082727	FBgn0038098	-	2606	56.6937	51.6064	0.13564	0.494	0.999568
FBtr0082724	FBgn0038102	-	1136	0.679166	0.701731	-0.0471539	0.97805	0.999568
FBtr0345505	FBgn0040091	-	1864	3.31247	1.91357	0.791642	0.11975	0.999568
FBtr0345508	FBgn0026872	-	1474	1.39732	1.08897	0.359701	0.6877	0.999568
FBtr0345509	FBgn0025391	-	2972	0.000313339	0.33614	-10.0671	1	1
TCONS_00651723	XLOC_152713	-	203	0.654989	0	inf	1	1
FBtr0100459	FBgn0261278	-	1649	0	0	0	1	1
FBtr0100451	FBgn0053155	-	725	3.54993	3.76516	-0.0849194	0.9736	0.999568
FBtr0100453	FBgn0053155	-	942	0.781783	0.546272	0.517149	0.84585	0.999568
FBtr0100455	FBgn0001235	-	2462	2.87322	1.77662	0.693538	1	1
FBtr0100454	FBgn0001235	-	3868	0.379942	0.0893683	2.08795	0.21595	0.999568
FBtr0100457	FBgn0016917	-	3616	7.07965	7.31498	-0.0471759	0.95615	0.999568
FBtr0100456	FBgn0032365	-	1515	0.0187768	0.0326213	-0.79686	1	1
FBtr0075155	FBgn0036769	-	1519	38.9514	48.5941	-0.319106	0.2802	0.999568
FBtr0346086	FBgn0030620	-	1082	0.0779779	3.0684e-05	11.3114	1	1
FBtr0346087	FBgn0030600	-	16734	3.13874	2.01499	0.639414	0.22205	0.999568
FBtr0346084	FBgn0267086	-	333	4.34705	3.61209	0.267204	0.6217	0.999568
FBtr0346085	FBgn0053178	-	825	1.71166	0.974198	0.813113	0.34365	0.999568
FBtr0346082	FBgn0030930	-	3668	1.51035	1.01543	0.572786	0.6123	0.999568
FBtr0346083	FBgn0030933	-	1532	0.292772	0.000133273	11.1012	1	1
FBtr0346080	FBgn0267084	-	1219	0.472166	0.467801	0.0134003	0.9792	0.999568
FBtr0346081	FBgn0267085	-	515	0.160222	0.213424	-0.413654	1	1
FBtr0346088	FBgn0015773	-	3339	0.167205	0.00011452	10.5118	1	1
FBtr0346089	FBgn0030529	-	1349	75.8151	86.1786	-0.184845	1	1
FBtr0331336	FBgn0263220	-	8450	0.493851	0.40761	0.276884	0.57985	0.999568
FBtr0331334	FBgn0028527	-	2004	0.324693	0.253927	0.354666	1	1
FBtr0331332	FBgn0028527	-	2404	0.655578	0.474219	0.467213	0.6888	0.999568
FBtr0331333	FBgn0028527	-	2041	1.29716	0.886666	0.548898	0.54365	0.999568
FBtr0331330	FBgn0041180	-	4723	0.388558	0.33931	0.195524	0.94455	0.999568
FBtr0331331	FBgn0264845	-	3555	0.139421	0.0415755	1.74565	1	1
TCONS_00649078	XLOC_149064	-	201	0.691107	0	inf	1	1
FBtr0070639	FBgn0026084	-	896	154.501	183.566	-0.24868	0.2752	0.999568
FBtr0070638	FBgn0000221	-	1450	12.8859	15.6364	-0.279115	0.25705	0.999568
FBtr0079719	FBgn0263852	-	526	86.4316	93.2901	-0.110165	0.67115	0.999568
FBtr0330064	FBgn0035715	-	1506	0.856624	0.380663	1.17015	0.67135	0.999568
FBtr0330067	FBgn0024150	-	6417	0.456137	0.42563	0.0998671	0.90925	0.999568
FBtr0330066	FBgn0024150	-	6206	0.990093	0.699339	0.501571	0.22285	0.999568
FBtr0330061	FBgn0035715	-	1554	2.76172	3.50119	-0.342275	0.745	0.999568
FBtr0330060	FBgn0035714	-	882	50.2775	55.9397	-0.153959	1	1
FBtr0330063	FBgn0035715	-	1491	7.28506	5.28304	0.463574	0.53185	0.999568
FBtr0330062	FBgn0035715	-	1542	7.95004	9.29205	-0.225035	0.71405	0.999568
FBtr0079711	FBgn0014417	-	2741	1.29001	1.03464	0.318259	0.8759	0.999568
FBtr0079710	FBgn0032042	-	2774	14.1557	16.1217	-0.187622	1	1
FBtr0079713	FBgn0040959	-	361	140.246	74.3459	0.915635	0.0004	0.0568069
FBtr0079712	FBgn0001084	-	1688	1.12153	0.379283	1.56412	0.37565	0.999568
FBtr0079715	FBgn0040098	-	792	0.172485	0.0288297	2.58084	1	1
FBtr0079714	FBgn0040958	-	337	1.17313	0.494187	1.24723	1	1
FBtr0079716	FBgn0015583	-	767	0.240713	0.0300775	3.00055	1	1
FBtr0307179	FBgn0052792	-	1822	0	0.136389	#NAME?	1	1
FBtr0307178	FBgn0005411	-	1473	110.876	134.943	-0.283397	1	1
FBtr0307175	FBgn0086448	-	1573	17.62	21.038	-0.255781	1	1
FBtr0307174	FBgn0086129	-	1972	4.2176	5.37171	-0.348959	0.63135	0.999568
FBtr0307177	FBgn0005411	-	1371	3.64755	4.83457	-0.406459	0.73415	0.999568
FBtr0307176	FBgn0005411	-	1344	2.21229	4.81579	-1.12223	0.5709	0.999568
FBtr0307171	FBgn0032338	-	2350	0.156503	1.39355e-05	13.4551	1	1
FBtr0307170	FBgn0035482	-	1859	7.52665	7.88708	-0.0674839	0.84855	0.999568
FBtr0307173	FBgn0260400	-	10506	1.47882	1.016	0.541542	0.29795	0.999568
FBtr0307172	FBgn0039970	-	1145	80.3201	74.6869	0.104907	0.74175	0.999568
TCONS_00667911	XLOC_176897	-	214	1.55333	0	inf	0.1232	0.999568
FBtr0343108	FBgn0032700	-	2418	0	0	0	1	1
FBtr0343109	FBgn0032701	-	1870	1.34589	1.09722	0.294711	0.8438	0.999568
FBtr0343104	FBgn0265995	-	433	0.429075	0.427889	0.00399156	1	1
FBtr0343105	FBgn0028888	-	6080	0.213074	0.0739916	1.52592	1	1
FBtr0343106	FBgn0265996	-	619	0.161592	0.126049	0.358375	1	1
FBtr0343107	FBgn0265997	-	237	2.38748	0	inf	0.1557	0.999568
FBtr0343100	FBgn0036402	-	2573	5.97358	3.79939	0.652826	0.4335	0.999568
FBtr0343101	FBgn0039145	-	702	8.04617	16.1222	-1.00267	0.39345	0.999568
FBtr0343102	FBgn0264906	-	549	0.959291	0.208786	2.19994	0.6007	0.999568
FBtr0333177	FBgn0259677	-	7849	0.380723	0.191906	0.988345	1	1
FBtr0289989	FBgn0003386	-	2428	0.0860797	0.0436093	0.981038	1	1
FBtr0289988	FBgn0015519	-	3908	0.171831	0.135138	0.346552	1	1
FBtr0289985	FBgn0034085	-	4589	9.22844	7.82242	0.238473	0.2649	0.999568
FBtr0289986	FBgn0042126	-	1804	0.504612	0.252802	0.997166	0.7706	0.999568
FBtr0289981	FBgn0032475	-	4846	2.62677	2.14098	0.29502	0.72985	0.999568
FBtr0289983	FBgn0035581	-	1656	0.0117803	0.0680891	-2.53104	1	1
FBtr0289982	FBgn0035581	-	13807	0.0702738	0.0814823	-0.2135	1	1
TCONS_00709431	XLOC_138531	-	234	0.366157	1.53614	-2.06878	1	1
FBtr0076772	FBgn0003041	-	5047	9.09355	11.0807	-0.285134	0.4234	0.999568
FBtr0076773	FBgn0003041	-	3311	0.576215	0.59461	-0.0453359	0.9794	0.999568
FBtr0076770	FBgn0035825	-	1340	25.0173	26.7051	-0.09419	0.7021	0.999568
FBtr0076771	FBgn0003041	-	3673	28.0527	33.0222	-0.235294	0.3181	0.999568
FBtr0076776	FBgn0016694	-	5065	0.000423838	0	inf	1	1
FBtr0076777	FBgn0016694	-	5107	1.30908	1.15094	0.185742	0.80915	0.999568
FBtr0076774	FBgn0003041	-	4685	0.524042	0.589163	-0.168985	0.91705	0.999568
FBtr0076775	FBgn0016694	-	2828	1.19653	1.45801	-0.285151	0.75515	0.999568
Novel000167.1	Novel000167	-	1094	0.787419	0.798303	-0.0198039	0.9874	0.999568
FBtr0340453	FBgn0034420	-	3536	3.05643	2.43707	0.326701	0.6355	0.999568
FBtr0340452	FBgn0034420	-	3109	1.1279	1.13659	-0.0110821	0.9924	0.999568
FBtr0340451	FBgn0034420	-	3154	3.37019	1.86833	0.851084	0.2866	0.999568
FBtr0340450	FBgn0000578	-	4417	4.34755	4.15299	0.0660526	0.8568	0.999568
FBtr0340457	FBgn0034417	-	2191	3.44252	3.27414	0.0723473	0.89145	0.999568
FBtr0340456	FBgn0263395	-	4228	7.6849	7.8757	-0.0353804	0.91155	0.999568
FBtr0071278	FBgn0011661	-	2401	52.7459	58.2012	-0.14199	0.69345	0.999568
FBtr0071279	FBgn0026411	-	3081	0.531926	0.22462	1.24374	0.0407	0.999568
FBtr0071276	FBgn0011661	-	2236	0.126256	0.505789	-2.00219	0.58815	0.999568
FBtr0071277	FBgn0011661	-	2282	2.45711	3.02644	-0.300661	0.87965	0.999568
FBtr0071274	FBgn0011661	-	2919	34.8701	38.697	-0.150231	0.71485	0.999568
FBtr0071275	FBgn0011661	-	2295	34.3388	38.9602	-0.182161	0.6965	0.999568
FBtr0071272	FBgn0011661	-	2027	0.300889	0.276307	0.122961	1	1
FBtr0071273	FBgn0011661	-	2283	1.4804	1.39996	0.0806003	0.9779	0.999568
FBtr0071270	FBgn0011661	-	2462	0.758503	0.533412	0.507906	0.8956	0.999568
FBtr0071271	FBgn0011661	-	2353	0	0	0	1	1
FBtr0337048	FBgn0037801	-	3074	7.71189	6.64641	0.214509	1	1
FBtr0337049	FBgn0262617	-	5525	0.52627	0.391788	0.425732	0.78285	0.999568
FBtr0337046	FBgn0038961	-	1876	0.449916	0.151568	1.56969	0.6263	0.999568
FBtr0337047	FBgn0038956	-	1471	0.441914	0.0986624	2.16319	0.41405	0.999568
FBtr0337044	FBgn0038965	-	1716	30.3864	32.4903	-0.0965858	0.7065	0.999568
FBtr0337045	FBgn0038967	-	3080	0.0693309	0.0489742	0.501476	1	1
FBtr0337042	FBgn0038491	-	1855	0.396654	0.653725	-0.720804	0.69285	0.999568
FBtr0337043	FBgn0038488	-	3789	4.72003	3.63091	0.378465	0.33915	0.999568
FBtr0337040	FBgn0039368	-	881	6.4046e-06	0.00355262	-9.11556	1	1
FBtr0337041	FBgn0053170	-	357	165.314	197.547	-0.256988	1	1
FBtr0343812	FBgn0001992	-	2787	0.142482	0.0180572	2.98013	1	1
FBtr0343813	FBgn0266204	-	653	0.374588	0.0793048	2.23982	1	1
FBtr0343810	FBgn0263078	-	1469	0.00022175	0.000218076	0.0241002	1	1
FBtr0343811	FBgn0262355	-	604	0.0840646	0.0862632	-0.0372475	1	1
FBtr0343816	FBgn0266207	-	823	0.109588	0.137096	-0.323097	1	1
FBtr0343817	FBgn0261804	-	6913	0.303582	0.159775	0.926042	1	1
FBtr0343814	FBgn0001994	-	4402	4.40738	3.7372	0.237964	0.662	0.999568
FBtr0343818	FBgn0266206	-	1226	0.217269	0.119183	0.866309	1	1
FBtr0343819	FBgn0051788	-	425	0	0	0	1	1
TCONS_00287344	XLOC_074883	-	220	0	0	0	1	1
TCONS_00287345	XLOC_074884	-	200	0	0	0	1	1
FBtr0300259	FBgn0000659	-	4030	1.02223e-05	2.02505e-05	-0.986234	1	1
FBtr0300255	FBgn0025628	-	2521	0.771674	0.466195	0.727058	0.8089	0.999568
FBtr0300254	FBgn0025628	-	2317	5.19668	5.4355	-0.0648216	0.9428	0.999568
FBtr0300257	FBgn0037773	-	713	1.78776	3.93828	-1.13941	0.25455	0.999568
FBtr0300256	FBgn0014006	-	4596	34.3844	36.1385	-0.0717818	0.71245	0.999568
FBtr0075310	FBgn0052163	-	855	5.28813	6.75927	-0.354112	0.3123	0.999568
FBtr0075313	FBgn0042177	-	3691	36.6077	44.7808	-0.290731	0.21155	0.999568
FBtr0075312	FBgn0042178	-	3649	1.53111	1.75695	-0.198494	0.6168	0.999568
FBtr0331228	FBgn0031664	-	2075	0	0	0	1	1
TCONS_00468255	XLOC_085839	-	4186	0.474436	0.479029	-0.0139009	0.9828	0.999568
FBtr0075314	FBgn0025558	-	465	35.6394	38.2051	-0.100295	0.71395	0.999568
FBtr0075317	FBgn0036654	-	1393	0.0262871	0.0271611	-0.0471878	1	1
TCONS_00793708	XLOC_156372	-	209	0	0.605504	#NAME?	0.2232	0.999568
FBtr0331224	FBgn0015623	-	2679	0.471803	0.455542	0.0506021	0.9332	0.999568
FBtr0331225	FBgn0031800	-	1774	0.763855	0.600844	0.346309	0.6962	0.999568
FBtr0331226	FBgn0031799	-	4546	0.780344	0.000178269	12.0958	0.0197	0.820712
FBtr0073658	FBgn0030403	-	2509	27.4892	27.7231	-0.0122247	0.95045	0.999568
FBtr0073659	FBgn0041203	-	4964	2.86774	3.28336	-0.195259	0.6984	0.999568
FBtr0073652	FBgn0030396	-	2304	45.1268	47.7053	-0.0801674	0.67945	0.999568
FBtr0073653	FBgn0030398	-	818	0.66377	0.00337727	7.61868	0.0817	0.999568
FBtr0073650	FBgn0030394	-	1326	0.168319	0.140959	0.25593	1	1
FBtr0073651	FBgn0002562	-	2625	0.824449	1.92174	-1.22091	0.00415	0.314774
FBtr0073656	FBgn0030408	-	1544	0.179685	0.106142	0.759472	1	1
FBtr0073657	FBgn0030406	-	1526	7.89909	4.44705	0.828837	0.17475	0.999568
FBtr0073655	FBgn0030407	-	2123	5.76021	6.67884	-0.213477	0.4321	0.999568
FBtr0333745	FBgn0261802	-	6913	0.385367	0.553297	-0.521822	0.8435	0.999568
FBtr0333744	FBgn0261802	-	5823	0.717095	0.592278	0.275889	0.8987	0.999568
FBtr0333746	FBgn0013323	-	673	0	0.0669641	#NAME?	1	1
FBtr0333740	FBgn0040031	-	1252	0	5.60039e-06	#NAME?	1	1
FBtr0333743	FBgn0261802	-	9304	0.121865	0.0607172	1.0051	1	1
FBtr0333742	FBgn0261802	-	6550	0	0.0637518	#NAME?	1	1
FBtr0345973	FBgn0267017	-	541	0.0989805	0.249996	-1.33669	1	1
FBtr0345972	FBgn0267016	-	210	0	0	0	1	1
FBtr0345970	FBgn0267015	-	306	0.301683	0.159084	0.923241	1	1
FBtr0333749	FBgn0015558	-	3757	0.447703	0.538398	-0.266129	0.7903	0.999568
FBtr0333748	FBgn0016041	-	2395	20.4528	20.3365	0.00822467	0.9835	0.999568
FBtr0345975	FBgn0267019	-	270	0.630359	0.228397	1.46463	1	1
FBtr0345974	FBgn0267018	-	303	0	0.163273	#NAME?	1	1
FBtr0336715	FBgn0053547	-	6268	0	0.00979449	#NAME?	1	1
FBtr0336714	FBgn0053547	-	10187	0.443286	0.243496	0.864342	0.084	0.999568
FBtr0336717	FBgn0053547	-	10892	0.168164	0.0458185	1.87587	1	1
FBtr0336716	FBgn0053547	-	6964	0.00700035	0	inf	1	1
FBtr0336711	FBgn0259736	-	5439	0.955263	0.536192	0.833147	0.49245	0.999568
FBtr0336710	FBgn0037837	-	2089	0	0.0383897	#NAME?	1	1
FBtr0336713	FBgn0053547	-	7864	0	0	0	1	1
FBtr0113186	FBgn0037182	-	2580	16.4296	21.9676	-0.419082	0.21045	0.999568
FBtr0336719	FBgn0053547	-	10519	0.0100206	0	inf	1	1
FBtr0336718	FBgn0053547	-	8629	0	0	0	1	1
FBtr0330177	FBgn0000565	-	980	53.0617	48.0163	0.144145	0.6842	0.999568
FBtr0330723	FBgn0260486	-	8434	2.7108	3.20473	-0.241486	0.519	0.999568
FBtr0330176	FBgn0000565	-	1056	34.7227	39.7524	-0.195162	0.60455	0.999568
FBtr0333811	FBgn0261793	-	6934	8.25712	10.2198	-0.307649	0.4342	0.999568
FBtr0330175	FBgn0037182	-	2298	0.368443	0.242834	0.601467	0.8451	0.999568
FBtr0333810	FBgn0264712	-	4339	0.119752	0.12164	-0.0225675	1	1
FBtr0113180	FBgn0036880	-	1516	8.70293e-06	0.0917605	-13.3641	1	1
FBtr0333813	FBgn0060296	-	2369	0.867019	0.59001	0.555324	0.39915	0.999568
FBtr0111094	FBgn0033159	-	7747	0.0260993	0	inf	1	1
FBtr0333815	FBgn0085434	-	12573	0.26893	0.159815	0.750828	1	1
FBtr0111092	FBgn0033159	-	7690	0.0295684	0.0281754	0.0696203	1	1
FBtr0333817	FBgn0085434	-	11475	0.0307664	0.0436196	-0.503625	1	1
FBtr0333816	FBgn0085434	-	12475	0.245072	0.104603	1.22828	1	1
FBtr0081099	FBgn0032705	-	2276	51.2025	61.3185	-0.260109	0.20005	0.999568
FBtr0081098	FBgn0032703	-	843	45.3322	54.1514	-0.256463	0.24825	0.999568
FBtr0333818	FBgn0028476	-	4844	1.17942	0.873786	0.432723	0.71135	0.999568
FBtr0081091	FBgn0261597	-	1112	5.92708	5.37156	0.141981	1	1
FBtr0081090	FBgn0261597	-	692	26.0141	30.7415	-0.240891	0.89895	0.999568
FBtr0081093	FBgn0086909	-	1842	6.37402	6.23773	0.0311836	0.9643	0.999568
FBtr0081092	FBgn0086909	-	1971	19.1452	18.0561	0.0844906	0.8407	0.999568
FBtr0081095	FBgn0032698	-	1216	44.4572	51.7486	-0.219102	0.5562	0.999568
FBtr0081097	FBgn0032701	-	1873	26.6238	25.6655	0.0528838	0.85255	0.999568
FBtr0081096	FBgn0032700	-	2351	25.0658	26.7382	-0.093184	1	1
FBtr0112858	FBgn0010348	-	1493	0.224948	0.0617682	1.86465	1	1
FBtr0074389	FBgn0030824	-	814	12.3344	12.727	-0.0452	0.87855	0.999568
FBtr0074388	FBgn0000163	-	11772	35.5862	27.6183	0.365694	0.05895	0.999568
FBtr0080514	FBgn0023407	-	5743	0.201197	0	inf	1	1
FBtr0111099	FBgn0033159	-	7756	0.0152022	0	inf	1	1
FBtr0074381	FBgn0030813	-	2013	31.9257	39.6375	-0.312147	0.12045	0.999568
FBtr0074383	FBgn0030816	-	2433	19.0347	26.1823	-0.459954	0.42175	0.999568
FBtr0074382	FBgn0030814	-	1838	0.179075	0.0965812	0.890753	1	1
FBtr0074385	FBgn0030817	-	1920	143.184	158.701	-0.148438	0.5519	0.999568
FBtr0074384	FBgn0030817	-	2087	23.5473	43.2088	-0.875767	0.19115	0.999568
FBtr0074387	FBgn0260747	-	997	111.447	97.5945	0.191483	0.338	0.999568
FBtr0074386	FBgn0260748	-	5088	13.7174	17.589	-0.358664	0.1757	0.999568
FBtr0339958	FBgn0033886	-	1495	0.401427	0.320642	0.324175	0.8928	0.999568
FBtr0339959	FBgn0033901	-	1570	24.7652	25.9422	-0.066986	0.8234	0.999568
FBtr0339956	FBgn0002643	-	7884	1.50522	1.43664	0.067277	0.88925	0.999568
TCONS_00974745	XLOC_209779	-	203	2.83715	2.12912	0.414184	1	1
FBtr0339957	FBgn0033889	-	5083	15.1463	16.6079	-0.132909	1	1
FBtr0339954	FBgn0033883	-	1244	41.4532	46.234	-0.157469	1	1
FBtr0113007	FBgn0031145	-	1607	5.29777	5.27448	0.0063557	0.99315	0.999568
FBtr0113004	FBgn0030976	-	2020	10.4691	6.36575	0.71773	0.02115	0.855918
FBtr0339955	FBgn0013770	-	1662	1.03969	0.750829	0.469591	0.8587	0.999568
FBtr0113003	FBgn0030954	-	2230	0.32264	0.217499	0.568917	1	1
FBtr0113000	FBgn0030925	-	2408	1.92165	1.36937	0.488839	0.35285	0.999568
FBtr0334718	FBgn0038826	-	3397	0	0	0	1	1
FBtr0334717	FBgn0038826	-	2862	0	0	0	1	1
FBtr0334716	FBgn0038826	-	4732	0	0	0	1	1
FBtr0334715	FBgn0038826	-	3407	0	0	0	1	1
FBtr0334714	FBgn0038826	-	2837	0	0	0	1	1
FBtr0334713	FBgn0038826	-	7374	0.223934	0.223267	0.00430099	1	1
FBtr0334712	FBgn0038826	-	2610	4.0516	3.23273	0.325737	0.7527	0.999568
FBtr0113008	FBgn0031209	-	2629	0.590958	0.66318	-0.166345	0.70435	0.999568
FBtr0113009	FBgn0031245	-	1455	1.96752	0.843633	1.22169	0.2546	0.999568
FBtr0080519	FBgn0032524	-	1335	22.0952	25.0626	-0.181803	0.50775	0.999568
FBtr0339951	FBgn0033872	-	1108	0	0	0	1	1
FBtr0075162	FBgn0036759	-	1021	20.8667	18.6294	0.163621	1	1
FBtr0075163	FBgn0052189	-	430	0.216983	0.148904	0.543198	1	1
FBtr0075160	FBgn0036761	-	1763	12.226	16.8169	-0.459967	1	1
FBtr0075161	FBgn0036760	-	1288	94.38	107.402	-0.186472	0.38465	0.999568
FBtr0075167	FBgn0036756	-	1553	16.5495	14.4837	0.192356	0.46955	0.999568
FBtr0075164	FBgn0052188	-	349	0.109854	0.116042	-0.0790542	1	1
FBtr0075169	FBgn0052187	-	1326	1.60654	2.25024	-0.486123	0.22695	0.999568
FBtr0339087	FBgn0265178	-	2010	6.87187	4.69873	0.548431	0.52105	0.999568
FBtr0088526	FBgn0025286	-	522	10.1653	9.7726	0.0568354	0.9361	0.999568
FBtr0088527	FBgn0025286	-	577	8.14258	7.73341	0.0743807	0.92985	0.999568
FBtr0088524	FBgn0033428	-	1299	78.9039	91.0118	-0.205957	0.30525	0.999568
FBtr0088525	FBgn0025286	-	509	2574.84	2645.17	-0.0388766	0.88675	0.999568
FBtr0088522	FBgn0033426	-	1929	13.5868	11.8802	0.193645	0.8607	0.999568
FBtr0088523	FBgn0033426	-	1880	2.08047	1.00307	1.05249	0.77435	0.999568
FBtr0088520	FBgn0033423	-	1686	21.1214	17.3056	0.287467	0.21235	0.999568
FBtr0088521	FBgn0033426	-	1673	0	0	0	1	1
FBtr0080052	FBgn0053303	-	1516	97.2546	107.484	-0.144288	1	1
FBtr0331596	FBgn0015774	-	6391	0.000335367	0.0744407	-7.7942	1	1
FBtr0080050	FBgn0262782	-	1159	300.584	287.396	0.0647288	1	1
FBtr0080051	FBgn0004106	-	1082	183.622	229.231	-0.320063	0.09215	0.999568
FBtr0080054	FBgn0027568	-	4070	27.1525	26.8369	0.0168682	1	1
FBtr0080055	FBgn0032228	-	1405	6.75946	6.15919	0.134167	0.6458	0.999568
FBtr0080059	FBgn0011703	-	2577	149.504	184.816	-0.305911	0.11025	0.999568
FBtr0331594	FBgn0030349	-	4771	0.273794	0.38115	-0.477267	0.7044	0.999568
FBtr0112755	FBgn0085478	-	2342	0.720133	0.63966	0.170958	0.91695	0.999568
FBtr0112754	FBgn0085478	-	4189	1.47558	2.45634	-0.735231	0.3545	0.999568
FBtr0112757	FBgn0085480	-	945	0	2.19811e-06	#NAME?	1	1
FBtr0112756	FBgn0085479	-	1472	0.366461	0.331076	0.146497	1	1
FBtr0112751	FBgn0085476	-	1472	7.64095e-06	0.0406366	-12.3767	1	1
FBtr0112750	FBgn0085475	-	350	4.87454	3.45252	0.497616	0.329	0.999568
FBtr0112753	FBgn0085478	-	6294	0	0	0	1	1
FBtr0112752	FBgn0085477	-	1052	0.0806896	0.14437	-0.839312	1	1
FBtr0331590	FBgn0030351	-	716	0.0605748	0.0598401	0.0176061	1	1
FBtr0331591	FBgn0030349	-	4492	0.752366	0.612996	0.295556	0.7819	0.999568
TCONS_00001721	XLOC_000873	-	582	0.309624	0.762693	-1.30058	0.1497	0.999568
TCONS_00683554	XLOC_150236	-	208	1.91144	0	inf	0.1688	0.999568
FBtr0089433	FBgn0005278	-	2353	0	0	0	1	1
FBtr0089432	FBgn0005278	-	2283	123.051	140.749	-0.193864	0.5658	0.999568
FBtr0089431	FBgn0005278	-	2380	0	4.00929	#NAME?	0.0989	0.999568
FBtr0089430	FBgn0005278	-	2380	75.9178	68.0805	0.157197	0.70955	0.999568
FBtr0089437	FBgn0005278	-	2387	0.936843	0.554054	0.75778	0.8444	0.999568
FBtr0089436	FBgn0005278	-	1971	0.703872	0.485351	0.536287	0.79615	0.999568
FBtr0089435	FBgn0005278	-	2309	74.5396	56.2932	0.405046	0.4171	0.999568
FBtr0089434	FBgn0005278	-	2429	18.6412	17.95	0.0545106	0.94785	0.999568
FBtr0083651	FBgn0004652	-	3402	0.748175	0.502432	0.574447	0.38415	0.999568
FBtr0088383	FBgn0000715	-	1427	1.78383	0.939644	0.924789	0.03495	0.999568
FBtr0088380	FBgn0050008	-	965	121.656	102.333	0.249526	0.44625	0.999568
FBtr0088381	FBgn0050007	-	5297	6.10307	8.11301	-0.410702	0.15405	0.999568
FBtr0083655	FBgn0038617	-	2167	15.2775	17.5056	-0.196415	0.37445	0.999568
FBtr0088387	FBgn0027619	-	1363	0	0	0	1	1
FBtr0088384	FBgn0033465	-	2300	52.1021	60.6885	-0.220084	0.32035	0.999568
FBtr0088385	FBgn0033466	-	2621	7.64067	7.8605	-0.0409221	0.93465	0.999568
FBtr0083658	FBgn0038613	-	2728	6.51382	6.58	-0.0145838	0.95475	0.999568
FBtr0088388	FBgn0033471	-	1526	33.6858	35.636	-0.0811926	0.691	0.999568
FBtr0088389	FBgn0033471	-	1581	0.35161	0.440196	-0.32417	0.88395	0.999568
FBtr0087721	FBgn0033828	-	592	0.129372	0.0456846	1.50174	1	1
FBtr0087720	FBgn0033830	-	1458	9.9427	16.8384	-0.760043	0.00705	0.442732
FBtr0087722	FBgn0033792	-	2932	0.0234459	2.22874e-05	10.0389	1	1
FBtr0333623	FBgn0264604	-	668	0.144954	0.0747038	0.956338	1	1
FBtr0087729	FBgn0086532	-	1799	0.222859	0.303042	-0.443385	1	1
FBtr0087728	FBgn0020391	-	3235	0.936336	0.805801	0.216603	0.93645	0.999568
FBtr0333106	FBgn0260442	-	9409	0.487805	0.139107	1.81011	0.58895	0.999568
FBtr0333105	FBgn0260442	-	9937	0.841363	0.275597	1.61017	0.4277	0.999568
FBtr0346590	FBgn0051781	-	2557	0.0124993	0	inf	1	1
FBtr0309054	FBgn0004244	-	3821	0.0523232	0.044357	0.238288	1	1
FBtr0309055	FBgn0010388	-	754	0.262331	0.0466351	2.4919	1	1
FBtr0346593	FBgn0025712	-	1292	0.394228	0.40756	-0.0479832	0.9593	0.999568
FBtr0333101	FBgn0004435	-	1813	1.87108	4.3468	-1.21608	0.4185	0.999568
FBtr0071368	FBgn0264691	-	1760	50.6736	54.4558	-0.103852	0.6931	0.999568
FBtr0333100	FBgn0027356	-	2497	4.28466	2.41234	0.82875	0.375	0.999568
FBtr0346595	FBgn0267314	-	604	0.0840646	0	inf	1	1
FBtr0346596	FBgn0267315	-	579	0.133856	0.0918128	0.543911	1	1
FBtr0346597	FBgn0264513	-	1122	2.283e-06	0.101327	-15.4377	1	1
FBtr0290228	FBgn0036767	-	698	11.9737	10.9328	0.131202	0.67435	0.999568
FBtr0290229	FBgn0032299	-	442	1.72024	1.98097	-0.203594	0.7184	0.999568
FBtr0290227	FBgn0030289	-	3430	11.8499	9.91292	0.257493	0.62335	0.999568
FBtr0290224	FBgn0035480	-	579	7.2206	4.97471	0.537504	1	1
FBtr0290225	FBgn0035548	-	686	0.0152643	0.0152931	-0.00271672	1	1
FBtr0290222	FBgn0037244	-	1178	74.8001	93.9513	-0.328873	0.20265	0.999568
FBtr0290223	FBgn0035797	-	2586	0.217644	0.200073	0.121439	1	1
FBtr0290220	FBgn0035159	-	972	0.463864	0.726426	-0.647112	0.70135	0.999568
FBtr0290221	FBgn0036690	-	867	78.4275	134.731	-0.780656	0.01425	0.67907
TCONS_00663367	XLOC_169913	-	801	0.55133	0.288918	0.932255	0.6104	0.999568
TCONS_00965671	XLOC_195065	-	212	0.577074	0	inf	1	1
TCONS_00965672	XLOC_195066	-	208	1.27429	0	inf	1	1
FBtr0082520	FBgn0037955	-	1665	4.07283	3.53646	0.203724	0.78185	0.999568
FBtr0082521	FBgn0037955	-	1638	1.91801	1.60199	0.259753	0.82225	0.999568
FBtr0082522	FBgn0037955	-	1430	2.876	1.98318	0.536247	0.63245	0.999568
FBtr0082526	FBgn0051116	-	4353	0.38987	0.119733	1.70318	0.33795	0.999568
FBtr0082527	FBgn0051116	-	3972	1.25018	0.834101	0.583839	0.40755	0.999568
FBtr0082528	FBgn0051116	-	3994	0.437055	0.136624	1.6776	0.2899	0.999568
FBtr0082529	FBgn0025802	-	6782	0.274865	0.20849	0.398743	1	1
FBtr0086450	FBgn0260934	-	4827	15.7468	17.9155	-0.186151	0.7029	0.999568
FBtr0310479	FBgn0263765	-	655	0.298667	0.0394814	2.9193	1	1
FBtr0086457	FBgn0260934	-	4868	2.52364	1.40319	0.846795	0.5773	0.999568
FBtr0310470	FBgn0261861	-	496	0	0.0184852	#NAME?	1	1
FBtr0310471	FBgn0261860	-	392	0	0	0	1	1
FBtr0310472	FBgn0261860	-	484	0	0	0	1	1
FBtr0310473	FBgn0038946	-	1103	0.268697	0	inf	1	1
FBtr0310475	FBgn0031191	-	2292	0.792602	0.771735	0.0384909	0.982	0.999568
FBtr0310476	FBgn0013799	-	2042	0.0227345	0.14276	-2.65063	1	1
FBtr0310477	FBgn0036911	-	1330	0.669307	0.788654	-0.236724	0.88855	0.999568
FBtr0072242	FBgn0010278	-	2507	76.6194	85.6704	-0.161086	0.38765	0.999568
FBtr0072241	FBgn0028411	-	527	95.8485	117.417	-0.292814	0.35975	0.999568
FBtr0072246	FBgn0034973	-	500	0.224051	0.23048	-0.0408171	1	1
FBtr0072247	FBgn0034974	-	2800	4.49591e-06	0.104435	-14.5036	1	1
FBtr0072245	FBgn0034904	-	614	0.533134	0.510152	0.063572	0.9301	0.999568
FBtr0072248	FBgn0034974	-	2815	0.0284534	0.00203011	3.80897	1	1
FBtr0072249	FBgn0086129	-	3936	28.3009	30.686	-0.116734	0.5509	0.999568
FBtr0086182	FBgn0022960	-	3470	3.68237	3.27504	0.169124	0.8032	0.999568
FBtr0086183	FBgn0022960	-	3467	31.651	35.486	-0.165	0.41495	0.999568
FBtr0086180	FBgn0029506	-	1394	192.43	178.148	0.111257	0.55495	0.999568
FBtr0086181	FBgn0029507	-	886	56.8299	44.711	0.34602	1	1
FBtr0086186	FBgn0050157	-	1034	0.326409	0	inf	1	1
FBtr0086184	FBgn0050156	-	1425	0.564075	0.144191	1.96791	0.5722	0.999568
FBtr0086185	FBgn0033121	-	1911	27.3655	35.0197	-0.35581	1	1
TCONS_00364439	XLOC_056155	-	970	1.44803	1.74285	-0.267352	0.7502	0.999568
TCONS_00473323	XLOC_095955	-	208	0	0	0	1	1
TCONS_00958455	XLOC_220979	-	1251	0.40252	0.241806	0.735209	1	1
TCONS_00251198	XLOC_079790	-	218	2.4276	0.489538	2.31003	0.29385	0.999568
FBtr0302637	FBgn0259243	-	1648	1.06013	0.909829	0.220576	0.918	0.999568
FBtr0302639	FBgn0259243	-	3245	3.21328	2.48199	0.372551	0.65425	0.999568
FBtr0302638	FBgn0259243	-	2426	2.67455	3.91936	-0.551322	0.4998	0.999568
FBtr0084968	FBgn0039404	-	657	43.6836	49.3072	-0.174706	0.5441	0.999568
FBtr0084969	FBgn0039407	-	1069	3.17099	2.84725	0.155362	0.8619	0.999568
FBtr0084962	FBgn0001139	-	2969	36.661	46.1376	-0.331699	0.20685	0.999568
FBtr0084963	FBgn0001139	-	2988	3.37442	3.06182	0.14025	0.88805	0.999568
FBtr0084960	FBgn0002633	-	982	0.263437	0.0901432	1.54717	1	1
FBtr0084961	FBgn0000591	-	769	0.180338	0.183275	-0.0233062	1	1
FBtr0084966	FBgn0001139	-	3002	0.188549	0.559586	-1.56942	0.65735	0.999568
FBtr0084967	FBgn0039402	-	1248	54.3766	56.3156	-0.0505503	0.7968	0.999568
FBtr0084964	FBgn0001139	-	2908	0	0	0	1	1
FBtr0084965	FBgn0001139	-	2887	0.11263	0.110125	0.0324494	1	1
Novel000150.1	Novel000150	-	991	0.424385	0.160385	1.40384	0.32595	0.999568
FBtr0307373	FBgn0263132	-	8588	0.0190948	0.00901588	1.08264	1	1
FBtr0307372	FBgn0263132	-	7541	0.0893295	0.0605515	0.560973	1	1
FBtr0307371	FBgn0263132	-	5317	7.57242e-06	0	inf	1	1
FBtr0307370	FBgn0263132	-	4678	0.108722	0.129706	-0.254598	1	1
FBtr0307377	FBgn0035888	-	2734	0.337611	0.721392	-1.09542	0.5601	0.999568
FBtr0307376	FBgn0035888	-	2641	2.65725	3.40825	-0.359097	0.61865	0.999568
FBtr0307375	FBgn0263132	-	11742	7.20343e-05	0.0130813	-7.5046	1	1
FBtr0307374	FBgn0263132	-	14423	0.023136	0.0281979	-0.285449	1	1
FBtr0307379	FBgn0039904	-	5372	9.2701	10.1867	-0.136029	0.77265	0.999568
FBtr0307378	FBgn0035888	-	2779	0.487524	0.603417	-0.307682	0.8613	0.999568
TCONS_00012211	XLOC_012280	-	1047	0.62928	0.394593	0.673336	0.2475	0.999568
FBtr0079261	FBgn0027496	-	1105	57.6077	68.9233	-0.258731	0.2518	0.999568
FBtr0079260	FBgn0031820	-	5718	5.48097	5.44054	0.0106807	0.9812	0.999568
FBtr0079263	FBgn0031824	-	1441	26.4561	31.9034	-0.270108	0.37985	0.999568
FBtr0079262	FBgn0051638	-	3212	1.28983	0.99997	0.367228	0.7188	0.999568
FBtr0079265	FBgn0031821	-	1002	0	0	0	1	1
FBtr0079264	FBgn0031822	-	483	60.1632	77.847	-0.37176	0.33225	0.999568
FBtr0079267	FBgn0031818	-	1944	25.7039	25.2603	0.0251146	0.91115	0.999568
FBtr0079266	FBgn0086357	-	2019	146.317	145.516	0.00791672	1	1
FBtr0079269	FBgn0259749	-	1921	10.2397	12.6091	-0.300292	0.60965	0.999568
FBtr0080934	FBgn0261068	-	705	29.3586	35.858	-0.288513	0.4463	0.999568
FBtr0080937	FBgn0032595	-	529	40.3523	41.5092	-0.0407817	0.9527	0.999568
FBtr0080936	FBgn0032596	-	774	182.915	222.825	-0.284732	1	1
FBtr0080931	FBgn0032609	-	1624	0	0.0255779	#NAME?	1	1
FBtr0080930	FBgn0022213	-	3237	121.009	139.759	-0.207823	0.3262	0.999568
FBtr0080933	FBgn0032602	-	1487	0.159749	0.233047	-0.544814	1	1
FBtr0080932	FBgn0000406	-	1465	252.307	257.182	-0.0276122	1	1
FBtr0303278	FBgn0261803	-	1407	0	0.0187211	#NAME?	1	1
FBtr0303279	FBgn0261803	-	1412	0.0573978	0.0965668	-0.750532	1	1
FBtr0303276	FBgn0261802	-	4308	0.695986	0.682101	0.0290735	0.99095	0.999568
FBtr0303277	FBgn0261802	-	10534	0	0	0	1	1
FBtr0303274	FBgn0261802	-	3774	2.29045	1.88296	0.282625	0.8409	0.999568
FBtr0303275	FBgn0261802	-	4450	0.192373	0	inf	1	1
FBtr0303272	FBgn0261802	-	6348	9.20461	9.31601	-0.0173541	0.9715	0.999568
FBtr0303273	FBgn0261802	-	6732	1.22262	0.71095	0.78216	0.6314	0.999568
FBtr0303270	FBgn0261801	-	2857	2.33509	2.46343	-0.0771897	0.80485	0.999568
FBtr0303271	FBgn0261802	-	6880	5.29996	4.09783	0.371123	0.5766	0.999568
FBtr0084038	FBgn0003257	-	2039	32.5571	36.3182	-0.157719	0.69615	0.999568
FBtr0084039	FBgn0025865	-	2416	23.4333	25.8252	-0.14022	0.5152	0.999568
FBtr0084030	FBgn0038859	-	591	0.216472	0.218839	-0.015689	1	1
FBtr0084032	FBgn0267841	-	3492	49.6209	46.3061	0.0997453	0.71565	0.999568
FBtr0084033	FBgn0038857	-	1000	46.4049	58.1117	-0.324554	0.28425	0.999568
FBtr0084034	FBgn0266674	-	2799	30.4935	33.9519	-0.154992	0.54495	0.999568
FBtr0084035	FBgn0038854	-	3171	23.7494	26.4939	-0.157771	0.42445	0.999568
FBtr0084036	FBgn0038853	-	5353	15.5391	17.2077	-0.147152	0.45015	0.999568
FBtr0084037	FBgn0038852	-	1267	0.610713	0.197945	1.6254	0.02455	0.924926
FBtr0075501	FBgn0260635	-	1820	0.0550454	0	inf	1	1
FBtr0304134	FBgn0032252	-	2131	0.818756	1.07802	-0.396883	0.53255	0.999568
FBtr0304137	FBgn0032259	-	1553	15.084	17.5322	-0.216986	1	1
FBtr0304133	FBgn0032256	-	2001	10.4429	11.5309	-0.142976	0.62895	0.999568
FBtr0304138	FBgn0086347	-	3882	0.708169	0.274246	1.36862	0.4325	0.999568
FBtr0304139	FBgn0262148	-	1374	0.410155	0.435905	-0.0878448	0.90195	0.999568
TCONS_00539486	XLOC_105747	-	206	0	1.30875	#NAME?	1	1
FBtr0344070	FBgn0031040	-	559	56.6543	64.7598	-0.192913	1	1
TCONS_00950446	XLOC_207433	-	249	1.92069	0.279946	2.7784	0.43675	0.999568
FBtr0331295	FBgn0032987	-	662	18.0846	16.8865	0.0988937	0.97625	0.999568
FBtr0300724	FBgn0036218	-	1898	0	0	0	1	1
FBtr0300727	FBgn0265574	-	3219	18.777	21.5943	-0.201685	1	1
FBtr0300721	FBgn0036218	-	1901	0.0204691	0.0213347	-0.0597592	1	1
FBtr0300722	FBgn0036218	-	1847	0	0.0419228	#NAME?	1	1
FBtr0300728	FBgn0039349	-	1847	2.73131	3.16088	-0.210732	0.81595	0.999568
FBtr0305269	FBgn0085329	-	635	0.00517813	0.00985759	-0.928804	1	1
FBtr0305268	FBgn0040206	-	1988	76.0633	83.8215	-0.140119	1	1
FBtr0305263	FBgn0043841	-	953	3.27841	1.35918	1.27026	0.61475	0.999568
FBtr0305262	FBgn0020309	-	6150	0.541687	0.332417	0.704465	0.6514	0.999568
FBtr0305261	FBgn0032362	-	2954	0.207509	0.141329	0.554115	1	1
FBtr0305260	FBgn0004363	-	1525	44.3059	43.8383	0.0153077	0.98235	0.999568
FBtr0305265	FBgn0032405	-	1386	0.0555192	0.0860218	-0.631715	1	1
FBtr0114628	FBgn0034180	-	3829	7.84987	7.20895	0.122879	0.68405	0.999568
FBtr0114623	FBgn0000578	-	4107	0.149082	0.132299	0.172302	1	1
FBtr0114622	FBgn0265356	-	5170	2.09837	1.15501	0.861364	0.124	0.999568
FBtr0114627	FBgn0034180	-	4361	1.79266	1.43711	0.318932	0.6073	0.999568
FBtr0083358	FBgn0022344	-	938	62.3288	69.3308	-0.153598	0.46015	0.999568
FBtr0344579	FBgn0262098	-	783	0	0.0878005	#NAME?	1	1
TCONS_00639369	XLOC_134692	-	263	0.460724	0.24879	0.888973	1	1
FBtr0083350	FBgn0003944	-	2784	0.886197	1.5792	-0.833495	0.18085	0.999568
FBtr0083351	FBgn0003944	-	3117	1.79768	0.677816	1.40717	0.04955	0.999568
FBtr0083352	FBgn0003944	-	4180	0.000203611	0.000629707	-1.62887	1	1
FBtr0083353	FBgn0051217	-	2289	15.6359	12.8042	0.288254	0.19645	0.999568
FBtr0083354	FBgn0038455	-	1103	40.5902	33.8495	0.261997	0.2345	0.999568
FBtr0344575	FBgn0262814	-	477	0	0.000236431	#NAME?	1	1
FBtr0083356	FBgn0038454	-	1811	13.345	15.7112	-0.235498	0.57	0.999568
FBtr0083357	FBgn0038452	-	1660	0.130266	0.158783	-0.285593	1	1
FBtr0111053	FBgn0033159	-	7699	0.0362459	0.0179206	1.0162	1	1
FBtr0111052	FBgn0033159	-	7702	0	0	0	1	1
FBtr0111051	FBgn0033159	-	7744	0.0340816	0.00384471	3.14804	1	1
FBtr0111050	FBgn0033159	-	7744	0.0207676	0	inf	1	1
FBtr0111057	FBgn0033159	-	7702	0.0171493	0.00046947	5.19097	1	1
FBtr0111056	FBgn0033159	-	7699	0.0245234	0.017832	0.459692	1	1
FBtr0111055	FBgn0033159	-	7747	0	0.00326538	#NAME?	1	1
FBtr0111054	FBgn0033159	-	7744	0.0112685	0.00384471	1.55135	1	1
FBtr0111059	FBgn0033159	-	7747	0.0112481	0	inf	1	1
FBtr0111058	FBgn0033159	-	7741	0.027917	0.013692	1.02781	1	1
FBtr0345752	FBgn0032068	-	3074	1.46648	0.00812355	7.49603	0.2966	0.999568
TCONS_00076397	XLOC_040096	-	1999	0.433032	0.452149	-0.0623254	0.90105	0.999568
FBtr0306769	FBgn0033159	-	7755	0	0.00803831	#NAME?	1	1
FBtr0306768	FBgn0033159	-	7710	0	0.0173989	#NAME?	1	1
FBtr0306767	FBgn0033159	-	7764	0.0366591	0.00465482	2.97737	1	1
FBtr0301633	FBgn0264493	-	2311	88.4194	104.796	-0.245148	0.57745	0.999568
FBtr0077206	FBgn0003423	-	3778	0	0	0	1	1
TCONS_00693994	XLOC_164933	-	208	2.54858	0	inf	1	1
FBtr0075360	FBgn0002284	-	944	263.267	306.743	-0.220502	0.24675	0.999568
FBtr0075361	FBgn0036648	-	1154	20.7551	24.589	-0.244547	0.69115	0.999568
FBtr0075363	FBgn0027500	-	3686	62.7531	77.3632	-0.301961	0.10925	0.999568
FBtr0075364	FBgn0003741	-	687	6.07166	8.00657	-0.399094	0.70505	0.999568
FBtr0075365	FBgn0036643	-	897	35.9904	39.4108	-0.130979	0.83695	0.999568
FBtr0075366	FBgn0036601	-	544	0.196169	0	inf	1	1
FBtr0331274	FBgn0264262	-	1047	0.0605174	0.146349	-1.27399	1	1
FBtr0075369	FBgn0042201	-	538	2.3439	1.68023	0.480254	0.36885	0.999568
FBtr0331279	FBgn0264260	-	411	0	0.0783926	#NAME?	1	1
TCONS_00943984	XLOC_196331	-	1115	0.546246	1.15767	-1.0836	0.3797	0.999568
TCONS_01061984	XLOC_216065	-	219	0	0	0	1	1
FBtr0071845	FBgn0034724	-	1116	47.4643	39.9798	0.247571	1	1
FBtr0071847	FBgn0034720	-	4656	0.0376172	0.000113093	8.37774	1	1
FBtr0071846	FBgn0034720	-	4703	0.466734	0.508813	-0.124536	0.87645	0.999568
FBtr0071841	FBgn0034729	-	1190	21.7332	25.6236	-0.237571	0.3339	0.999568
FBtr0071840	FBgn0034729	-	1132	2.33423	4.18867	-0.843546	0.34955	0.999568
FBtr0071843	FBgn0022986	-	1592	3.00931	3.2293	-0.101789	0.8863	0.999568
FBtr0071842	FBgn0034727	-	1440	43.6672	49.4257	-0.17871	0.58125	0.999568
FBtr0071849	FBgn0034718	-	3087	13.7498	9.00842	0.610069	0.00845	0.498681
FBtr0071848	FBgn0017482	-	1959	11.1135	9.74488	0.189597	0.82455	0.999568
FBtr0332896	FBgn0028342	-	978	46.3612	35.1577	0.399076	1	1
FBtr0332897	FBgn0040941	-	494	6.00886e-06	0	inf	1	1
FBtr0332894	FBgn0029895	-	4754	2.86856	1.8654	0.620841	0.24125	0.999568
FBtr0332895	FBgn0030181	-	1095	0.881876	1.1235	-0.349351	0.87205	0.999568
FBtr0332892	FBgn0029895	-	4433	0	0.063727	#NAME?	1	1
FBtr0332893	FBgn0029895	-	4612	2.39725	2.51669	-0.0701453	0.8841	0.999568
FBtr0332890	FBgn0031053	-	2801	1.48106	1.0808	0.454533	0.2424	0.999568
FBtr0075417	FBgn0036623	-	1605	45.3066	47.484	-0.0677206	0.7448	0.999568
FBtr0331503	FBgn0264308	-	6433	0.910984	0.4283	1.0888	0.01095	0.582347
FBtr0332898	FBgn0030183	-	2606	0.0321944	0	inf	1	1
FBtr0332899	FBgn0030183	-	2877	12.2327	11.5683	0.0805638	0.80715	0.999568
FBtr0078678	FBgn0037372	-	1335	40.8302	49.9306	-0.290287	0.15855	0.999568
FBtr0070466	FBgn0003371	-	2847	1.04006	0.823186	0.337383	0.8579	0.999568
FBtr0070467	FBgn0003371	-	2929	6.66283	9.43279	-0.501549	0.37675	0.999568
FBtr0070460	FBgn0001150	-	1780	0.219001	0.213529	0.0365054	1	1
FBtr0070461	FBgn0052797	-	931	0.233885	0.165306	0.500662	1	1
FBtr0070462	FBgn0040385	-	1537	0.0904926	0.0787743	0.200074	1	1
FBtr0078670	FBgn0037376	-	1592	116.768	149.54	-0.356892	0.061	0.999568
FBtr0078672	FBgn0027608	-	2281	0	0	0	1	1
FBtr0070468	FBgn0003371	-	3055	23.3914	26.8929	-0.201253	0.5477	0.999568
FBtr0070469	FBgn0003371	-	4244	2.69177	2.007	0.423519	0.63155	0.999568
FBtr0078677	FBgn0266672	-	3363	33.2217	33.9097	-0.0295718	0.9128	0.999568
FBtr0075413	FBgn0014163	-	3283	0	0	0	1	1
FBtr0085749	FBgn0062411	-	1031	0.12429	0.0412852	1.59001	1	1
FBtr0075410	FBgn0027080	-	1771	56.3282	58.882	-0.0639675	0.7468	0.999568
FBtr0071599	FBgn0034618	-	4906	10.1575	12.7199	-0.324543	0.3913	0.999568
FBtr0085748	FBgn0051008	-	529	0.102382	0.102313	0.000971298	1	1
FBtr0075411	FBgn0036629	-	1700	6.54932	8.09761	-0.306151	0.65205	0.999568
FBtr0071593	FBgn0016726	-	389	298.366	278.35	0.100179	0.8827	0.999568
FBtr0071592	FBgn0016726	-	329	3769.67	3809.68	-0.0152291	0.94085	0.999568
FBtr0071591	FBgn0034611	-	2563	1.32703	1.76774	-0.413705	0.6953	0.999568
FBtr0071590	FBgn0034611	-	2399	3.33196	3.44177	-0.0467801	0.94365	0.999568
FBtr0346323	FBgn0051235	-	2494	0.167495	0.0374333	2.16172	1	1
FBtr0346322	FBgn0262794	-	593	0.0641273	0	inf	1	1
FBtr0346321	FBgn0037672	-	1428	0.717509	0.5712	0.329	0.58455	0.999568
FBtr0346320	FBgn0267188	-	205	0	0	0	1	1
FBtr0346327	FBgn0267193	-	300	0.318079	0.156519	1.02305	1	1
FBtr0346326	FBgn0267192	-	395	0.169983	0.264239	-0.636449	1	1
FBtr0346325	FBgn0267191	-	673	11.4596	13.7353	-0.261332	1	1
FBtr0346324	FBgn0267190	-	467	0	0.0625815	#NAME?	1	1
FBtr0346329	FBgn0267195	-	601	0.84417	0.302888	1.47875	0.0812	0.999568
FBtr0346328	FBgn0267194	-	211	0	0	0	1	1
TCONS_00986570	XLOC_191850	-	205	0	0.720061	#NAME?	1	1
FBtr0081842	FBgn0037581	-	1524	0.766193	1.28581	-0.746901	0.47945	0.999568
FBtr0304855	FBgn0262526	-	3337	1.21266	1.33596	-0.139694	0.93225	0.999568
FBtr0304854	FBgn0262526	-	2241	68.9436	83.5556	-0.277321	0.2678	0.999568
FBtr0304853	FBgn0013733	-	17148	1.2449	0.828403	0.587631	1	1
FBtr0304852	FBgn0013733	-	17813	0.143002	0.113442	0.334079	1	1
FBtr0304851	FBgn0013733	-	13661	6.17307	4.1208	0.583066	0.3886	0.999568
FBtr0304850	FBgn0013733	-	17845	0.240781	0.514873	-1.0965	0.67475	0.999568
FBtr0081840	FBgn0037580	-	2398	93.4732	113.322	-0.277808	0.20465	0.999568
FBtr0304859	FBgn0262475	-	3802	0.0962602	0.187988	-0.96563	1	1
FBtr0304858	FBgn0262475	-	3987	0.139436	0.168831	-0.275976	1	1
FBtr0078712	FBgn0037359	-	1080	15.2104	19.4345	-0.353559	0.6823	0.999568
FBtr0084835	FBgn0039335	-	2091	16.2697	17.3213	-0.0903639	0.74155	0.999568
FBtr0081844	FBgn0020249	-	1380	50.2987	63.2098	-0.329628	0.323	0.999568
FBtr0081845	FBgn0020249	-	1388	1.56782	4.82812	-1.62271	1	1
FBtr0344335	FBgn0260634	-	8889	5.05352	5.17391	-0.0339664	0.9517	0.999568
FBtr0084839	FBgn0039336	-	1280	21.8525	26.4384	-0.274838	0.35465	0.999568
FBtr0076108	FBgn0015828	-	1622	69.4438	84.6281	-0.285291	0.14145	0.999568
FBtr0071339	FBgn0030101	-	1277	7.73875	8.91661	-0.204395	0.70935	0.999568
FBtr0302092	FBgn0261261	-	5372	8.98764e-05	0	inf	1	1
FBtr0344330	FBgn0033863	-	2193	0.0582926	0	inf	1	1
FBtr0071333	FBgn0052704	-	2811	0.112925	0.0868708	0.378415	1	1
FBtr0076100	FBgn0036176	-	285	0.360132	0.374064	-0.0547613	1	1
FBtr0071331	FBgn0000077	-	1422	4.11712	4.17547	-0.0203027	0.9841	0.999568
FBtr0076102	FBgn0036184	-	1275	34.5207	45.03	-0.383425	0.0709	0.999568
FBtr0076105	FBgn0042138	-	1181	0.786432	0.284461	1.46709	0.63875	0.999568
FBtr0076104	FBgn0042138	-	1237	1.59327	2.28972	-0.52318	0.69375	0.999568
FBtr0076107	FBgn0036188	-	967	29.7537	34.0476	-0.194483	1	1
FBtr0076106	FBgn0052091	-	2967	7.13082	8.01778	-0.169134	0.4762	0.999568
FBtr0330634	FBgn0033639	-	3693	1.2688	0.92115	0.461958	0.6397	0.999568
FBtr0079109	FBgn0031724	-	1804	0.194511	0.165539	0.232683	1	1
FBtr0330636	FBgn0031217	-	1221	2.46844	5.97792	-1.27604	0.3494	0.999568
FBtr0330637	FBgn0002931	-	1662	0.0882316	0.426205	-2.27218	1	1
FBtr0330630	FBgn0020279	-	5116	0.332478	0.195179	0.768462	1	1
FBtr0330631	FBgn0020279	-	4835	1.01056	1.12228	-0.15127	0.93405	0.999568
FBtr0330632	FBgn0033639	-	2885	5.06309	3.8947	0.378507	0.5608	0.999568
FBtr0334992	FBgn0011571	-	1631	2.15509	1.66263	0.374278	0.7175	0.999568
FBtr0079100	FBgn0002525	-	3129	49.2583	58.096	-0.238072	1	1
FBtr0079101	FBgn0031717	-	1216	0.00351238	0.00308582	0.186795	1	1
FBtr0079102	FBgn0031717	-	1529	0.206917	0	inf	1	1
FBtr0079103	FBgn0031719	-	919	0.0953911	0.0741262	0.363872	1	1
FBtr0079104	FBgn0031721	-	1179	0.193099	0.127785	0.595629	1	1
FBtr0330639	FBgn0031228	-	586	9.21071	8.55784	0.106066	0.9723	0.999568
FBtr0079106	FBgn0004620	-	3253	2.00825	1.28697	0.641962	0.0576	0.999568
FBtr0331329	FBgn0041180	-	4700	1.65442	2.05424	-0.312284	0.7714	0.999568
FBtr0077854	FBgn0031389	-	964	5.89917	5.46126	0.111279	1	1
FBtr0077850	FBgn0000097	-	4879	2.91292	2.22388	0.389382	0.39955	0.999568
FBtr0077851	FBgn0000097	-	4266	0.000402903	0.026782	-6.05469	1	1
FBtr0077852	FBgn0031391	-	1707	27.5805	32.0498	-0.216671	1	1
FBtr0077853	FBgn0031390	-	5401	11.843	14.7369	-0.315401	0.32725	0.999568
FBtr0347493	FBgn0027497	-	3777	0.128233	0.126819	0.0159925	1	1
FBtr0347490	FBgn0267929	-	588	0.130828	0.307657	-1.23365	1	1
FBtr0347496	FBgn0267730	-	2039	0.14966	0.105235	0.508071	1	1
FBtr0347497	FBgn0010812	-	3987	0.300906	0.400464	-0.412361	0.8443	0.999568
FBtr0347494	FBgn0036825	-	1139	2.58469	2.07134	0.319431	0.8974	0.999568
FBtr0347495	FBgn0264513	-	3947	0.132432	0.0313462	2.07889	1	1
TCONS_00498996	XLOC_103359	-	227	0	1.21872	#NAME?	1	1
FBtr0340642	FBgn0265708	-	663	0.0366112	1.07435e-06	15.0565	1	1
FBtr0340643	FBgn0265708	-	763	0.0609065	0.0605737	0.00790432	1	1
FBtr0340640	FBgn0265707	-	394	0.340686	0.0849027	2.00456	1	1
FBtr0340641	FBgn0265710	-	1641	0.220549	0.148235	0.573214	1	1
FBtr0340646	FBgn0265712	-	368	0.0980197	0.103592	-0.0797732	1	1
FBtr0340644	FBgn0265709	-	390	0.432585	0.0865945	2.32064	1	1
FBtr0340645	FBgn0265711	-	495	0.113794	0.117132	-0.0417131	1	1
FBtr0340648	FBgn0265715	-	392	0.345065	0.0857402	2.00882	1	1
FBtr0340649	FBgn0265716	-	378	0.461224	0.484303	-0.0704432	1	1
FBtr0345067	FBgn0261872	-	2998	0.586091	0.924588	-0.657687	0.5474	0.999568
TCONS_00035907	XLOC_009834	-	214	1.65113	0	inf	0.2329	0.999568
FBtr0345060	FBgn0041780	-	1519	0.131077	0.0537089	1.28718	1	1
FBtr0345063	FBgn0266692	-	467	0.187994	0.129215	0.540912	1	1
FBtr0290024	FBgn0036173	-	890	8.69786	9.15057	-0.0732014	0.93145	0.999568
FBtr0290025	FBgn0035793	-	4841	0.00164317	0	inf	1	1
FBtr0290026	FBgn0035793	-	5282	1.07075	2.05674	-0.94173	0.20445	0.999568
FBtr0345062	FBgn0266692	-	583	0.176885	0	inf	1	1
FBtr0290021	FBgn0030575	-	1780	2.00542	1.32349	0.599555	0.403	0.999568
FBtr0290022	FBgn0262514	-	672	0.216049	0.554581	-1.36004	0.6274	0.999568
FBtr0290023	FBgn0038603	-	3611	5.38119e-05	7.01822e-05	-0.383181	1	1
FBtr0347146	FBgn0036461	-	2391	9.701	7.10207	0.449895	0.41635	0.999568
FBtr0347147	FBgn0260744	-	3673	20.2871	20.841	-0.0388604	0.9117	0.999568
FBtr0347140	FBgn0267668	-	3432	0.85341	0.736934	0.211703	1	1
FBtr0347148	FBgn0027083	-	4314	0.280645	0.215879	0.378522	1	1
FBtr0347149	FBgn0038063	-	6672	1.38239	1.34424	0.0403693	0.9232	0.999568
TCONS_00657729	XLOC_161541	-	205	1.24363	0.672	0.888023	0.70795	0.999568
FBtr0332261	FBgn0263197	-	6150	1.91287	1.75033	0.128113	0.8688	0.999568
FBtr0299542	FBgn0036656	-	599	0.0100397	0.128103	-3.67352	1	1
FBtr0299543	FBgn0030559	-	1367	1.53693	0.861361	0.835362	0.54135	0.999568
FBtr0299544	FBgn0085399	-	4377	0.39966	0.0843925	2.24359	0.4049	0.999568
FBtr0299546	FBgn0265296	-	3476	0.126735	0.0285888	2.14829	1	1
FBtr0299547	FBgn0265296	-	3631	0.140719	0.0756464	0.89547	1	1
FBtr0299548	FBgn0265296	-	6195	0.000124962	4.26666e-06	4.87224	1	1
FBtr0299549	FBgn0265296	-	8863	0	0	0	1	1
FBtr0332263	FBgn0263197	-	5742	0.884817	0.365114	1.27703	0.4091	0.999568
FBtr0345068	FBgn0085446	-	17173	0.496568	0.111068	2.16055	0.11755	0.999568
FBtr0077279	FBgn0003300	-	2474	0.0197386	8.91347e-06	11.1127	1	1
FBtr0332262	FBgn0263197	-	6168	0.152455	0.258208	-0.760149	1	1
FBtr0077271	FBgn0031141	-	893	22.8179	21.2469	0.102912	0.68565	0.999568
FBtr0077272	FBgn0011834	-	901	70.449	66.5797	0.0814981	0.69905	0.999568
FBtr0077273	FBgn0031139	-	2498	0.118136	0.114484	0.0453043	1	1
FBtr0077274	FBgn0031139	-	2531	0.000367662	0.201891	-9.10098	1	1
FBtr0077275	FBgn0031139	-	2416	0.400938	0.116569	1.7822	0.08175	0.999568
FBtr0077276	FBgn0031126	-	2993	32.7198	34.0289	-0.0565968	0.83035	0.999568
FBtr0077277	FBgn0031127	-	663	0.110502	8.12103e-06	13.732	1	1
FBtr0332267	FBgn0013467	-	2713	0.0723426	0.0953463	-0.398331	1	1
TCONS_00210313	XLOC_054199	-	366	1.76411	0.0983489	4.16489	0.33045	0.999568
TCONS_00210311	XLOC_054197	-	245	2.32254	0.892091	1.38044	0.68245	0.999568
FBtr0332266	FBgn0263197	-	6177	5.37648	4.6365	0.213627	0.6556	0.999568
FBtr0343336	FBgn0034971	-	1985	0.410853	0.258129	0.670528	0.8459	0.999568
FBtr0343334	FBgn0025806	-	574	0	0	0	1	1
FBtr0072738	FBgn0041342	-	2486	35.498	27.7085	0.357407	1	1
FBtr0072739	FBgn0041342	-	2529	1.88834	1.87675	0.0088848	0.9924	0.999568
FBtr0072732	FBgn0052318	-	785	6.60437	11.78	-0.834851	0.01305	0.645783
FBtr0072733	FBgn0004378	-	3871	33.5586	39.6348	-0.240084	0.20785	0.999568
FBtr0072730	FBgn0010333	-	1718	0.00336856	3.53079	-10.0336	1	1
FBtr0072731	FBgn0035194	-	692	37.6979	60.0984	-0.672843	0.0041	0.312221
FBtr0072736	FBgn0035229	-	5382	0.673744	0.792625	-0.234437	0.82525	0.999568
FBtr0072737	FBgn0035229	-	5610	4.58729	4.00341	0.196414	0.6616	0.999568
FBtr0072734	FBgn0035193	-	1187	0.71354	0.448963	0.6684	0.83845	0.999568
FBtr0072735	FBgn0035229	-	5390	13.8597	16.4729	-0.249198	0.2794	0.999568
FBtr0074779	FBgn0031026	-	711	0.133404	0.137067	-0.0390805	1	1
FBtr0074774	FBgn0031030	-	2099	47.5851	65.7852	-0.467254	1	1
FBtr0074775	FBgn0026430	-	3313	0.119449	0.116888	0.0312632	1	1
FBtr0074776	FBgn0026430	-	3253	1.23589	1.18534	0.0602448	0.97135	0.999568
FBtr0074777	FBgn0026430	-	3154	60.4972	69.0859	-0.191522	1	1
FBtr0332463	FBgn0003382	-	5871	0.112741	0.102578	0.136284	1	1
FBtr0074771	FBgn0031030	-	4035	41.2289	52.7117	-0.354466	1	1
FBtr0074772	FBgn0031030	-	3685	0.939278	1.51237	-0.687189	0.79685	0.999568
FBtr0074773	FBgn0031030	-	2238	5.24095	5.36512	-0.0337801	0.9806	0.999568
FBtr0074198	FBgn0030685	-	4304	4.96226	3.57618	0.472577	0.47655	0.999568
FBtr0339738	FBgn0033783	-	2695	24.893	29.5934	-0.249536	1	1
FBtr0087902	FBgn0033716	-	1257	28.107	34.8149	-0.308773	0.157	0.999568
FBtr0087905	FBgn0050047	-	2809	1.34757	1.27775	0.0767594	0.83195	0.999568
FBtr0087904	FBgn0266111	-	6284	27.0034	31.385	-0.216935	0.25205	0.999568
FBtr0087907	FBgn0050043	-	3082	0.324542	0.209106	0.634172	1	1
FBtr0087906	FBgn0050049	-	2796	1.84423	2.03798	-0.14412	0.65625	0.999568
FBtr0074190	FBgn0025809	-	1507	22.3862	25.1756	-0.169412	0.4863	0.999568
FBtr0074191	FBgn0025809	-	1435	6.33681	10.0738	-0.668785	0.13515	0.999568
FBtr0074192	FBgn0030691	-	2559	0.476439	0.330192	0.528989	0.27235	0.999568
FBtr0074193	FBgn0030688	-	902	66.7547	52.0563	0.358796	0.26975	0.999568
FBtr0074194	FBgn0030685	-	4077	2.47782	1.53381	0.691945	0.5179	0.999568
FBtr0339737	FBgn0265427	-	629	0.435331	0.532212	-0.289889	0.69025	0.999568
FBtr0332285	FBgn0029666	-	4744	3.39831	3.49731	-0.0414282	0.9899	0.999568
FBtr0074197	FBgn0030685	-	4362	1.93863	1.40322	0.466294	0.6681	0.999568
FBtr0336904	FBgn0085443	-	6738	0.198501	0.117667	0.754433	1	1
FBtr0336905	FBgn0030164	-	1241	0.526905	0.592776	-0.169944	0.8695	0.999568
FBtr0336906	FBgn0030164	-	1227	0.239203	0.281211	-0.233422	1	1
FBtr0336907	FBgn0030163	-	1176	0.183245	0.568053	-1.63226	0.5191	0.999568
FBtr0336901	FBgn0052687	-	2803	0.851933	0.553369	0.622497	0.6706	0.999568
FBtr0336902	FBgn0085443	-	3089	0.186697	0.200517	-0.103022	1	1
FBtr0336903	FBgn0085443	-	2896	0	0	0	1	1
Novel000094.1	Novel000094	-	1102	3.79618	3.80709	-0.00414253	0.9971	0.999568
FBtr0336908	FBgn0260991	-	2459	49.385	59.5314	-0.269578	1	1
FBtr0336909	FBgn0033160	-	2610	42.5772	44.9748	-0.0790359	1	1
FBtr0075823	FBgn0036369	-	1070	2.78476	2.7451	0.0206957	0.9646	0.999568
FBtr0075822	FBgn0036369	-	1569	0.62003	0.325732	0.928653	0.454	0.999568
FBtr0075821	FBgn0036369	-	1518	3.23505e-05	0	inf	1	1
FBtr0075820	FBgn0036369	-	2045	0	0.000934739	#NAME?	1	1
FBtr0075825	FBgn0036366	-	1097	30.6921	37.7411	-0.298271	0.4164	0.999568
FBtr0075824	FBgn0036367	-	918	25.4089	19.6293	0.37233	0.24605	0.999568
TCONS_00465445	XLOC_124275	-	203	1.45478	0	inf	1	1
FBtr0080485	FBgn0032484	-	2497	0.718439	0.334107	1.10456	0.58455	0.999568
FBtr0080484	FBgn0032485	-	3184	26.4526	30.136	-0.188079	0.3442	0.999568
FBtr0080487	FBgn0032483	-	1042	1.63153	1.40523	0.215419	0.94105	0.999568
FBtr0080481	FBgn0032493	-	863	0.103565	0.130419	-0.332609	1	1
FBtr0080480	FBgn0051730	-	680	0.177394	0.0728728	1.2835	1	1
FBtr0080483	FBgn0032487	-	911	33.7687	37.5707	-0.153923	0.6026	0.999568
FBtr0080482	FBgn0032489	-	656	0.59626	0.188327	1.6627	0.09015	0.999568
FBtr0080489	FBgn0032479	-	4365	56.0013	63.1256	-0.172764	0.4033	0.999568
FBtr0080488	FBgn0032481	-	5882	9.529	10.9971	-0.206727	0.53415	0.999568
FBtr0346676	FBgn0052823	-	2200	0.413151	0.15561	1.40873	1	1
FBtr0081688	FBgn0000552	-	652	0.1877	0.152402	0.300544	1	1
FBtr0081689	FBgn0004777	-	1097	0.0766906	0.0808517	-0.0762296	1	1
FBtr0081681	FBgn0037462	-	921	0.0473193	0	inf	1	1
FBtr0081682	FBgn0051286	-	1834	0.105986	0.0651232	0.702635	1	1
FBtr0081684	FBgn0010355	-	6552	8.72699	10.7045	-0.294658	0.4085	0.999568
FBtr0081685	FBgn0010355	-	6744	0.574006	1.04316	-0.861825	0.5329	0.999568
FBtr0081686	FBgn0010355	-	6651	2.55196	2.46209	0.0517245	0.9399	0.999568
FBtr0081687	FBgn0262801	-	855	80.7626	86.8038	-0.10407	0.6641	0.999568
TCONS_00730507	XLOC_176743	-	209	0	0	0	1	1
FBtr0089086	FBgn0025936	-	5630	0.701187	0.382404	0.874702	0.70265	0.999568
FBtr0089084	FBgn0025936	-	4190	0	0	0	1	1
FBtr0089085	FBgn0025936	-	3691	40.1708	47.4194	-0.239328	0.38765	0.999568
FBtr0089082	FBgn0025936	-	4142	34.2358	35.5032	-0.0524451	1	1
FBtr0089083	FBgn0025936	-	4068	6.6631	9.62845	-0.531111	0.44645	0.999568
FBtr0089080	FBgn0039911	-	2374	1.88719	1.37399	0.45787	0.28875	0.999568
FBtr0081532	FBgn0051544	-	792	0.115237	0.174625	-0.599662	1	1
FBtr0081534	FBgn0037503	-	1230	0.200247	0.0510147	1.9728	1	1
FBtr0081538	FBgn0003885	-	1980	43.4421	44.5713	-0.0370201	0.85495	0.999568
FBtr0334508	FBgn0004573	-	4486	0.160296	0.144465	0.150024	1	1
FBtr0334509	FBgn0038100	-	1045	28.9102	41.9925	-0.538551	0.25765	0.999568
FBtr0334506	FBgn0051109	-	978	4.84157	5.9367	-0.294186	0.6345	0.999568
FBtr0334507	FBgn0039261	-	2862	36.4359	47.2104	-0.373743	0.13895	0.999568
FBtr0334504	FBgn0039266	-	1721	3.45847	1.76373	0.971501	0.43645	0.999568
FBtr0334505	FBgn0266719	-	3671	1.07667	2.00369	-0.896085	0.2504	0.999568
FBtr0334502	FBgn0039065	-	1491	3.2072	2.56341	0.323248	0.8184	0.999568
FBtr0334503	FBgn0039265	-	1040	0.760665	0.584094	0.38106	0.90145	0.999568
FBtr0334500	FBgn0039065	-	1500	7.97868	12.3945	-0.635475	1	1
FBtr0334501	FBgn0039065	-	1497	16.283	15.56	0.0655277	0.89365	0.999568
FBtr0084339	FBgn0051281	-	1491	0.0598235	0.0339902	0.815593	1	1
FBtr0084338	FBgn0039030	-	1112	17.9354	16.5796	0.113406	0.6681	0.999568
FBtr0084337	FBgn0017590	-	4052	0.75262	0.47121	0.675551	0.36425	0.999568
FBtr0084336	FBgn0046114	-	1211	178.454	177.36	0.00887256	1	1
FBtr0084334	FBgn0039003	-	2671	12.5384	13.5853	-0.115695	0.64135	0.999568
FBtr0084333	FBgn0039007	-	1249	0.228044	0.132132	0.787335	1	1
FBtr0084330	FBgn0039010	-	2919	0.38777	0.188734	1.03885	0.0519	0.999568
FBtr0076844	FBgn0011640	-	1758	0.564747	0.54277	0.057262	0.9539	0.999568
FBtr0076845	FBgn0011640	-	2087	1.44016	1.52249	-0.0802055	0.96595	0.999568
FBtr0076846	FBgn0019662	-	1934	0.562335	0.711803	-0.340049	0.90905	0.999568
FBtr0076847	FBgn0035771	-	2944	85.3923	87.7802	-0.0397901	0.8291	0.999568
FBtr0076841	FBgn0011640	-	1837	22.8591	21.5681	0.0838718	0.86965	0.999568
FBtr0076842	FBgn0011640	-	1650	26.4596	31.924	-0.270848	0.55565	0.999568
FBtr0076843	FBgn0011640	-	1784	1.51528	1.2929	0.228977	0.92465	0.999568
FBtr0076848	FBgn0082598	-	1268	95.8469	133.167	-0.47443	1	1
FBtr0076849	FBgn0082598	-	2080	43.3377	57.1589	-0.399356	0.2867	0.999568
Novel000191.1	Novel000191	-	218	1.50794	0	inf	1	1
FBtr0084481	FBgn0039094	-	1330	20.3185	22.9853	-0.177913	0.4364	0.999568
FBtr0084480	FBgn0051145	-	2595	0.0604814	0	inf	1	1
FBtr0084486	FBgn0039091	-	2212	21.4591	13.8685	0.629774	0.0046	0.336437
FBtr0334959	FBgn0038243	-	703	38.0606	41.7484	-0.133426	1	1
FBtr0334958	FBgn0264903	-	281	0	0	0	1	1
Novel000185.1	Novel000185	-	211	1.66526	0	inf	1	1
TCONS_00749962	XLOC_163217	-	215	0.490491	1.64923	-1.74949	1	1
FBtr0330670	FBgn0014010	-	1775	0.233576	0.187901	0.313917	1	1
FBtr0083599	FBgn0038596	-	494	0.91359	0.302415	1.59501	0.47465	0.999568
FBtr0083596	FBgn0010877	-	2634	0	0	0	1	1
FBtr0083597	FBgn0038598	-	2040	0.675558	0.502056	0.428233	0.8018	0.999568
FBtr0083594	FBgn0038601	-	1414	46.7348	51.1789	-0.131052	0.52045	0.999568
FBtr0083595	FBgn0010877	-	3277	29.1992	31.9966	-0.13199	0.4999	0.999568
FBtr0083592	FBgn0038603	-	3662	0.666473	0.698475	-0.0676631	0.95575	0.999568
FBtr0083593	FBgn0038602	-	615	0.204076	0.0840284	1.28015	1	1
FBtr0083591	FBgn0038603	-	3643	0	0	0	1	1
FBtr0076146	FBgn0003292	-	3268	14.5122	18.9121	-0.382041	0.0658	0.999568
FBtr0087686	FBgn0033853	-	2260	24.1641	19.9252	0.27827	0.4621	0.999568
FBtr0087687	FBgn0033853	-	1826	5.58305	3.45068	0.694171	0.5356	0.999568
FBtr0087684	FBgn0053156	-	1824	32.1151	41.8524	-0.382057	0.26335	0.999568
FBtr0087685	FBgn0033853	-	2213	20.3861	21.5854	-0.0824746	0.8337	0.999568
FBtr0087682	FBgn0053156	-	1874	5.3244	7.31188	-0.457622	0.57035	0.999568
FBtr0087683	FBgn0053156	-	2330	2.87093	3.91986	-0.449283	0.6512	0.999568
FBtr0087681	FBgn0053156	-	2030	2.6561	2.7046	-0.0261067	0.983	0.999568
FBtr0334957	FBgn0020299	-	3643	0	0	0	1	1
FBtr0334956	FBgn0020299	-	4594	0.565326	0.16221	1.80121	0.089	0.999568
FBtr0339358	FBgn0265309	-	1192	0.0521795	0.141521	-1.43946	1	1
FBtr0339359	FBgn0005638	-	2581	0.043531	0.123568	-1.5052	1	1
TCONS_00055998	XLOC_040496	-	210	2.36756	0	inf	1	1
FBtr0332848	FBgn0052512	-	1412	0.270632	0.352674	-0.382003	0.88365	0.999568
FBtr0344467	FBgn0031126	-	2800	11.3858	12.6505	-0.151955	0.75865	0.999568
FBtr0346944	FBgn0267539	-	710	0.0998983	0.0667414	0.581879	1	1
FBtr0332841	FBgn0004373	-	6109	3.39212	4.39544	-0.37382	0.5448	0.999568
FBtr0332840	FBgn0052343	-	2131	0	0.000378964	#NAME?	1	1
TCONS_00479739	XLOC_107309	-	360	2.24142	1.56049	0.522408	0.81765	0.999568
FBtr0308746	FBgn0263322	-	596	0.0853975	0.0427269	0.999048	1	1
FBtr0308745	FBgn0263321	-	591	29.8939	12.7769	1.22631	1	1
FBtr0308744	FBgn0263320	-	508	0.163744	0.0545255	1.58644	1	1
TCONS_00938549	XLOC_188198	-	203	4.85175	4.45979	0.121528	1	1
TCONS_00938545	XLOC_188187	-	223	6.34669	4.199	0.595959	1	1
FBtr0089908	FBgn0032455	-	1194	72.942	88.5871	-0.280347	0.553	0.999568
FBtr0308748	FBgn0034670	-	790	2.11544	1.9876	0.089929	0.8364	0.999568
FBtr0309298	FBgn0035755	-	2038	0.1327	0.0962105	0.463903	1	1
FBtr0309299	FBgn0035755	-	1773	1.81709	0.796766	1.1894	0.3738	0.999568
FBtr0309294	FBgn0013305	-	1727	0.122772	0.10681	0.200925	1	1
FBtr0309295	FBgn0013305	-	1634	0	0	0	1	1
TCONS_00041211	XLOC_017662	-	206	0.671001	2.05698	-1.61614	1	1
TCONS_00967478	XLOC_197979	-	200	0.792413	0	inf	1	1
FBtr0086227	FBgn0034529	-	4602	5.642	6.16848	-0.128708	0.58245	0.999568
FBtr0086226	FBgn0034527	-	1925	3.28456	2.25321	0.543721	0.6315	0.999568
FBtr0086225	FBgn0034527	-	1949	31.6962	39.3876	-0.313431	0.27675	0.999568
FBtr0342597	FBgn0265798	-	1073	0.117753	0.098307	0.260403	1	1
FBtr0086222	FBgn0267791	-	1342	0.249272	0.0532513	2.22683	1	1
FBtr0086221	FBgn0267791	-	2127	1.85192	1.71355	0.112028	0.9244	0.999568
FBtr0086220	FBgn0267791	-	2076	54.9907	61.9793	-0.172599	0.38735	0.999568
Novel000239.1	Novel000239	-	269	0.428478	0	inf	1	1
FBtr0086229	FBgn0034532	-	1917	0.291622	0.492629	-0.756403	0.8429	0.999568
FBtr0081949	FBgn0037613	-	610	18.5839	20.7604	-0.159776	1	1
FBtr0081948	FBgn0037620	-	1159	17.7527	21.2164	-0.257141	0.38175	0.999568
FBtr0078479	FBgn0004514	-	3682	0.919474	0.769251	0.257355	0.48635	0.999568
FBtr0078478	FBgn0000045	-	1543	13.6662	10.9711	0.316905	0.2443	0.999568
FBtr0078477	FBgn0037146	-	2868	76.3942	59.2546	0.366535	1	1
FBtr0081942	FBgn0037627	-	1271	3.61243	2.61998	0.463412	0.2051	0.999568
FBtr0078475	FBgn0037144	-	2166	28.6736	31.836	-0.150937	0.44985	0.999568
FBtr0081940	FBgn0053189	-	677	1.78307	1.42462	0.323787	0.9204	0.999568
FBtr0081947	FBgn0037621	-	1519	37.9924	45.8407	-0.270918	0.18645	0.999568
FBtr0081946	FBgn0037623	-	3294	1.55878	1.93933	-0.315145	0.60595	0.999568
FBtr0078471	FBgn0037140	-	2085	6.6127	5.39483	0.293663	0.63695	0.999568
FBtr0081944	FBgn0037623	-	3476	10.6094	11.0826	-0.0629558	0.775	0.999568
TCONS_00038856	XLOC_014367	-	262	0.945709	0.251984	1.90806	0.5704	0.999568
TCONS_00548007	XLOC_123636	-	223	0	0.880143	#NAME?	0.2528	0.999568
FBtr0303845	FBgn0026059	-	2015	0.484732	0.0810429	2.58043	0.4784	0.999568
FBtr0303844	FBgn0030018	-	4945	17.2903	20.8653	-0.271149	0.29795	0.999568
FBtr0303847	FBgn0002709	-	4420	0.186032	0.127996	0.539449	1	1
FBtr0303846	FBgn0034390	-	1255	16.6526	16.1896	0.0406832	0.92165	0.999568
FBtr0303841	FBgn0038069	-	1379	0.203813	0.178486	0.191442	1	1
FBtr0303840	FBgn0038068	-	1330	0.213603	0.0930789	1.19841	1	1
FBtr0303843	FBgn0030018	-	5594	2.55499	2.65567	-0.0557603	0.9286	0.999568
FBtr0303842	FBgn0030018	-	5165	0.889296	0.788198	0.174106	0.89165	0.999568
FBtr0303849	FBgn0039140	-	2712	5.01047	3.25178	0.623715	0.468	0.999568
FBtr0303848	FBgn0028581	-	5005	8.23314	11.1357	-0.435682	0.2065	0.999568
TCONS_00997205	XLOC_214230	-	209	0	0.649534	#NAME?	1	1
TCONS_00020903	XLOC_025525	-	215	1.47147	0	inf	1	1
TCONS_00419973	XLOC_097475	-	686	1.54038	3.69783	-1.2634	0.00755	0.463963
FBtr0303599	FBgn0025702	-	3919	0	0	0	1	1
TCONS_00265327	XLOC_067962	-	219	0	0	0	1	1
TCONS_00362900	XLOC_051270	-	504	4.55441	3.29534	0.466839	0.8853	0.999568
Novel000137.1	Novel000137	-	205	1.24363	0.672	0.888023	1	1
TCONS_01018477	XLOC_223902	-	262	44.2635	58.6784	-0.406712	0.6021	0.999568
FBtr0306301	FBgn0037556	-	2536	2.66714	4.0734	-0.610939	0.333	0.999568
FBtr0091719	FBgn0064126	-	1547	0.390448	0.433371	-0.150473	0.94055	0.999568
FBtr0091718	FBgn0053721	-	546	0.048803	0.154846	-1.66579	1	1
FBtr0091717	FBgn0046874	-	4148	0.623331	0.432034	0.528852	0.79615	0.999568
FBtr0091716	FBgn0046874	-	6324	0.686214	0.660896	0.0542347	0.97005	0.999568
FBtr0091711	FBgn0260458	-	3010	0	0	0	1	1
FBtr0091710	FBgn0260458	-	3563	1.07892	1.17056	-0.11761	0.89295	0.999568
FBtr0306305	FBgn0262891	-	588	0	0.0897345	#NAME?	1	1
FBtr0306304	FBgn0262890	-	1164	5.53489e-05	5.50306e-05	0.00832087	1	1
FBtr0087352	FBgn0024754	-	1830	7.75997	10.0067	-0.366849	0.49105	0.999568
FBtr0303339	FBgn0030328	-	2986	0.236316	0.0514151	2.20046	1	1
FBtr0303338	FBgn0030328	-	2784	6.2493	8.76347	-0.487808	0.24575	0.999568
FBtr0303337	FBgn0030328	-	2945	2.48475	4.01792	-0.693352	0.27575	0.999568
FBtr0303336	FBgn0030328	-	2704	2.70467	3.2814	-0.27886	0.7369	0.999568
FBtr0303335	FBgn0030329	-	1740	1.47779	0.321683	2.19973	0.3953	0.999568
FBtr0303334	FBgn0030329	-	1746	0.873808	0.576611	0.599717	0.82135	0.999568
FBtr0347308	FBgn0267730	-	1214	0.304961	0.0680848	2.16322	1	1
FBtr0347309	FBgn0267731	-	512	0.916398	0.383437	1.25698	0.2323	0.999568
FBtr0347302	FBgn0085362	-	1960	0	0.283949	#NAME?	1	1
TCONS_00010013	XLOC_008538	-	220	0.736202	1.31376	-0.835522	0.72515	0.999568
FBtr0347306	FBgn0267751	-	2574	1.10188	0.526411	1.06571	0.03955	0.999568
FBtr0347307	FBgn0267729	-	615	0.285638	0.590591	-1.04797	0.6982	0.999568
FBtr0347305	FBgn0267750	-	617	0	0	0	1	1
FBtr0305658	FBgn0039900	-	2596	0.238995	0.134214	0.832453	1	1
FBtr0305656	FBgn0003721	-	1318	1.35856	0.238958	2.50725	0.55185	0.999568
FBtr0305657	FBgn0053300	-	5253	0.0685124	0.0735351	-0.102068	1	1
FBtr0305654	FBgn0003721	-	1503	0.191005	0.427168	-1.1612	0.6545	0.999568
FBtr0305655	FBgn0003721	-	752	1.49533	0.780972	0.937118	0.7852	0.999568
FBtr0305652	FBgn0003638	-	3609	0	0.339657	#NAME?	1	1
FBtr0305653	FBgn0033484	-	3834	0.208721	0.0782021	1.4163	1	1
FBtr0305650	FBgn0266569	-	486	22.5191	27.6392	-0.295566	1	1
FBtr0305651	FBgn0003638	-	3478	0.566407	0.421324	0.426908	0.8871	0.999568
FBtr0300026	FBgn0041232	-	1116	0.168676	0.0583442	1.53159	1	1
FBtr0347108	FBgn0267650	-	2367	0.661742	0.67169	-0.0215268	0.97745	0.999568
TCONS_00227050	XLOC_079875	-	221	1.37452	0	inf	1	1
FBtr0300025	FBgn0051785	-	1487	0.441387	0.276674	0.673857	0.7235	0.999568
FBtr0300020	FBgn0016076	-	3455	16.5664	10.5414	0.65219	1	1
FBtr0300021	FBgn0041103	-	948	0.183493	0.115798	0.664114	1	1
FBtr0300028	FBgn0085271	-	343	35.5133	38.3246	-0.109913	0.742	0.999568
TCONS_00242858	XLOC_066509	-	972	0.621812	0.885764	-0.510444	0.33805	0.999568
FBtr0347101	FBgn0267645	-	361	0.202424	0.323572	-0.676708	1	1
TCONS_00538898	XLOC_104956	-	207	0	2.59581	#NAME?	0.2264	0.999568
FBtr0347105	FBgn0028734	-	2896	3.8252	6.16939	-0.689591	0.33075	0.999568
FBtr0078994	FBgn0031657	-	1153	37.6815	43.7344	-0.214912	0.5681	0.999568
FBtr0078995	FBgn0031659	-	1986	30.6705	33.6419	-0.133406	0.6657	0.999568
FBtr0078996	FBgn0031660	-	1138	64.6775	69.8457	-0.110909	1	1
FBtr0078997	FBgn0031662	-	1194	49.8236	51.2281	-0.0401042	0.87385	0.999568
FBtr0078990	FBgn0031650	-	1318	0.23078	0.124856	0.886258	1	1
FBtr0078991	FBgn0015000	-	1784	26.5591	28.0106	-0.0767634	0.77155	0.999568
FBtr0078992	FBgn0031655	-	2411	16.8166	20.2932	-0.271111	0.20005	0.999568
FBtr0340332	FBgn0034321	-	711	0.185824	0.198851	-0.0977451	1	1
FBtr0340333	FBgn0034325	-	590	0.0869764	0.275511	-1.66342	1	1
FBtr0340330	FBgn0265594	-	500	0.223928	0.0559328	2.00127	1	1
FBtr0300519	FBgn0259174	-	4454	5.53422	5.91964	-0.0971314	0.90135	0.999568
FBtr0340336	FBgn0265595	-	4261	0.216508	0.0746149	1.53689	1	1
FBtr0340337	FBgn0265595	-	2831	0.143142	0.0469851	1.60717	1	1
FBtr0340334	FBgn0265593	-	637	0.194011	0	inf	1	1
FBtr0340335	FBgn0265595	-	4394	0.010666	0.0693034	-2.6999	1	1
FBtr0300680	FBgn0034645	-	405	119.738	131.826	-0.138755	0.7096	0.999568
FBtr0300681	FBgn0039116	-	938	2.76513	3.02574	-0.12994	0.9227	0.999568
FBtr0300687	FBgn0039329	-	3310	0.634881	0.535621	0.245274	0.80475	0.999568
FBtr0300685	FBgn0037531	-	2985	5.0205	7.8912	-0.652415	1	1
FBtr0300688	FBgn0036052	-	2233	1.81835	1.64253	0.146714	0.80695	0.999568
FBtr0300689	FBgn0031208	-	1880	2.93541	1.77736	0.723827	0.15505	0.999568
FBtr0337037	FBgn0038603	-	1537	3.22389	2.05487	0.649756	0.32695	0.999568
FBtr0331965	FBgn0034031	-	821	0.753812	1.06742	-0.501855	0.7632	0.999568
FBtr0331963	FBgn0034031	-	771	1.32984	1.05684	0.331498	0.81785	0.999568
FBtr0331962	FBgn0264330	-	238	0	0	0	1	1
FBtr0301375	FBgn0028371	-	1939	0	0.0418162	#NAME?	1	1
FBtr0301374	FBgn0028371	-	9430	1.53712	1.75303	-0.189616	0.66575	0.999568
FBtr0301377	FBgn0028371	-	5989	0.58931	0.575183	0.0350062	0.97545	0.999568
FBtr0301376	FBgn0028371	-	1845	0	0.704271	#NAME?	0.16775	0.999568
FBtr0301371	FBgn0011225	-	4550	0	0	0	1	1
FBtr0301370	FBgn0011225	-	4279	12.7282	12.5505	0.0202867	1	1
FBtr0301372	FBgn0033725	-	1733	0.0483962	0.035613	0.442487	1	1
FBtr0331960	FBgn0003091	-	4711	1.60035	1.33833	0.257958	0.49245	0.999568
FBtr0301379	FBgn0024963	-	1770	0.202454	0.437972	-1.11325	0.5887	0.999568
FBtr0301378	FBgn0024963	-	1650	1.26203	0.76509	0.72205	0.4892	0.999568
FBtr0306684	FBgn0033766	-	5786	23.8428	28.2266	-0.243505	0.1928	0.999568
FBtr0306685	FBgn0082582	-	2299	1.44468	0.889666	0.699418	0.52035	0.999568
FBtr0306686	FBgn0082582	-	2699	0	0.0634354	#NAME?	1	1
FBtr0306687	FBgn0082582	-	3484	0.138747	0.0487311	1.50954	1	1
FBtr0345216	FBgn0039487	-	2190	0	0	0	1	1
FBtr0306681	FBgn0028935	-	2901	0.0960212	0.15015	-0.644978	1	1
FBtr0306682	FBgn0035813	-	4388	0.310547	0.2031	0.612618	1	1
FBtr0306683	FBgn0036380	-	1878	0.143831	0.0308649	2.22033	1	1
FBtr0345218	FBgn0039213	-	2907	10.1937	9.18433	0.150428	1	1
FBtr0345219	FBgn0038294	-	2827	0.39368	0.0946777	2.05593	0.61895	0.999568
FBtr0306688	FBgn0033504	-	2384	0.146386	0	inf	1	1
FBtr0300974	FBgn0030882	-	1789	0	0	0	1	1
FBtr0300975	FBgn0052495	-	2151	0	0	0	1	1
FBtr0300976	FBgn0052495	-	1337	0	0	0	1	1
FBtr0300977	FBgn0052495	-	1804	0	0	0	1	1
FBtr0300970	FBgn0030882	-	1804	0	0	0	1	1
FBtr0300971	FBgn0030882	-	1337	0	0	0	1	1
FBtr0300972	FBgn0030882	-	2002	0	0	0	1	1
FBtr0300973	FBgn0030882	-	2151	0	0	0	1	1
FBtr0300978	FBgn0052495	-	1938	0	0	0	1	1
FBtr0300979	FBgn0052495	-	2002	0	0	0	1	1
FBtr0301089	FBgn0011476	-	460	38.1019	52.1888	-0.453878	1	1
FBtr0301088	FBgn0039065	-	1671	1.54964	3.43532	-1.14851	0.37915	0.999568
FBtr0301087	FBgn0031296	-	1288	3.1046	0.952306	1.70491	0.4445	0.999568
FBtr0301085	FBgn0039075	-	4648	0.490105	0.815386	-0.734392	1	1
FBtr0301084	FBgn0029791	-	3372	0.150348	0.0772882	0.959989	1	1
FBtr0301083	FBgn0029791	-	3920	0.970669	0.606103	0.679417	0.45165	0.999568
FBtr0299586	FBgn0016797	-	4597	1.39321	1.18351	0.235339	0.70265	0.999568
FBtr0301081	FBgn0085417	-	1989	0.19563	0.061895	1.66023	1	1
TCONS_00992663	XLOC_205119	-	578	0.519734	0.488361	0.0898268	0.9395	0.999568
FBtr0299587	FBgn0061200	-	7927	14.6959	15.9251	-0.115891	0.68155	0.999568
FBtr0345357	FBgn0022238	-	958	0.881108	2.20699	-1.32469	0.25865	0.999568
FBtr0111152	FBgn0058470	-	2990	5.61176	3.60292	0.639289	0.01895	0.802892
FBtr0299581	FBgn0086899	-	7243	8.42105	10.1728	-0.272643	0.5407	0.999568
TCONS_00955482	XLOC_216228	-	276	1.16021	0.793842	0.547462	0.7731	0.999568
FBtr0299582	FBgn0086899	-	5890	0	0	0	1	1
FBtr0299583	FBgn0086899	-	4673	11.3694	15.3455	-0.43266	0.3709	0.999568
FBtr0333374	FBgn0259173	-	5246	0.244508	0.000987346	7.95211	1	1
FBtr0345356	FBgn0034588	-	2134	3.30949	1.09679	1.59332	1	1
FBtr0333375	FBgn0259173	-	5383	0.108895	0.160468	-0.559347	1	1
FBtr0100340	FBgn0004903	-	2828	3.46745	2.83242	0.291837	0.57865	0.999568
FBtr0100342	FBgn0005561	-	4201	0.0430996	0.0626682	-0.540058	1	1
FBtr0100345	FBgn0005561	-	2257	0.382889	0.365193	0.0682673	0.9714	0.999568
FBtr0100344	FBgn0005561	-	2749	1.07383	0.446641	1.26558	0.57525	0.999568
FBtr0100346	FBgn0005561	-	4501	0.415731	0.196861	1.07847	0.67435	0.999568
FBtr0111240	FBgn0086683	-	1354	5.98901	6.69904	-0.161635	0.8409	0.999568
FBtr0111241	FBgn0086683	-	1257	1.97275	2.21086	-0.164404	0.913	0.999568
FBtr0111246	FBgn0041004	-	1501	0	0.417222	#NAME?	0.17385	0.999568
FBtr0111247	FBgn0041004	-	5581	0.513346	0.562927	-0.133018	0.927	0.999568
FBtr0111244	FBgn0041004	-	1745	0	0	0	1	1
FBtr0111245	FBgn0041004	-	1624	37.3408	44.3078	-0.246807	0.42455	0.999568
FBtr0111248	FBgn0041004	-	1804	25.5823	29.3682	-0.199109	0.56145	0.999568
FBtr0111249	FBgn0041004	-	4284	1.82957	1.23383	0.568357	0.55905	0.999568
FBtr0332913	FBgn0004607	-	10141	2.62319	1.53187	0.776023	0.14755	0.999568
FBtr0332912	FBgn0033212	-	5298	14.2545	16.2603	-0.189939	0.4597	0.999568
FBtr0332911	FBgn0033212	-	6319	2.74571	2.37937	0.206596	0.719	0.999568
FBtr0332910	FBgn0034792	-	2940	3.27765	3.31013	-0.0142236	0.9816	0.999568
FBtr0332917	FBgn0004907	-	1760	3.83651	0	inf	0.06775	0.999568
FBtr0332916	FBgn0004907	-	2924	0.0225672	0	inf	1	1
FBtr0332915	FBgn0011241	-	766	1.45222	1.29245	0.168155	0.95115	0.999568
FBtr0332914	FBgn0050010	-	873	9.36272	9.89066	-0.0791378	0.9319	0.999568
FBtr0332918	FBgn0033904	-	998	9.68667	5.19863	0.89787	1	1
FBtr0345354	FBgn0034543	-	599	19.6575	13.801	0.510303	1	1
FBtr0302859	FBgn0261573	-	2085	20.9024	21.8103	-0.0613438	0.8746	0.999568
FBtr0306538	FBgn0067779	-	3454	5.96093	7.87936	-0.402541	0.55895	0.999568
FBtr0306539	FBgn0067779	-	4153	0.427743	0.374776	0.190717	0.94685	0.999568
FBtr0306536	FBgn0067779	-	3731	16.311	16.651	-0.0297598	1	1
FBtr0302854	FBgn0263235	-	886	15.0825	18.1787	-0.269374	1	1
FBtr0306534	FBgn0035533	-	3507	0.0104386	0	inf	1	1
FBtr0302856	FBgn0039003	-	2668	4.60134	5.3284	-0.211648	0.60635	0.999568
FBtr0302850	FBgn0027341	-	2628	0	0	0	1	1
FBtr0302853	FBgn0051262	-	2001	25.8074	31.649	-0.294375	0.1599	0.999568
FBtr0302852	FBgn0051262	-	1988	0	0	0	1	1
TCONS_00977867	XLOC_215104	-	210	0.605921	0	inf	1	1
FBtr0337035	FBgn0051051	-	853	3.64841e-05	0.0467116	-10.3223	1	1
FBtr0334076	FBgn0035265	-	2200	0.366501	0.184722	0.98846	0.724	0.999568
FBtr0334077	FBgn0035264	-	3878	3.04627	2.37764	0.357516	1	1
FBtr0334074	FBgn0035268	-	2525	19.8198	23.0052	-0.21502	1	1
FBtr0334075	FBgn0022702	-	1911	1.70095	1.39539	0.285678	0.83305	0.999568
FBtr0334072	FBgn0035267	-	5090	0.480377	0.267147	0.846535	0.63635	0.999568
FBtr0334073	FBgn0035268	-	2540	0.84409	0.47194	0.838794	1	1
FBtr0334070	FBgn0036544	-	6737	0.970366	0.956284	0.021089	0.9614	0.999568
FBtr0334071	FBgn0036544	-	6755	0.000635601	7.24938e-05	3.13219	1	1
FBtr0334078	FBgn0027594	-	3148	1.04898	1.47076	-0.487582	0.72865	0.999568
FBtr0334079	FBgn0027594	-	4435	9.40724	9.79152	-0.0577611	0.8835	0.999568
FBtr0075669	FBgn0036465	-	940	0.647843	0.604389	0.100166	0.9532	0.999568
FBtr0089861	FBgn0053467	-	561	0	0	0	1	1
FBtr0089867	FBgn0035028	-	2360	0.534904	0.703601	-0.395477	0.82085	0.999568
FBtr0089868	FBgn0035028	-	2170	6.73185	6.7726	-0.0087076	0.986	0.999568
FBtr0089869	FBgn0029854	-	1607	1.20767	1.09205	0.145185	0.9615	0.999568
FBtr0075663	FBgn0036469	-	489	0.754596	0.832867	-0.142382	1	1
FBtr0075665	FBgn0036467	-	544	2.69709	3.01827	-0.16232	0.90295	0.999568
FBtr0075664	FBgn0036468	-	560	1.68867	0.672951	1.32732	0.5782	0.999568
FBtr0075666	FBgn0036466	-	660	0.627633	0.151954	2.04629	0.56035	0.999568
FBtr0331754	FBgn0052579	-	1317	0.411994	0.716086	-0.79751	0.7945	0.999568
FBtr0331755	FBgn0052579	-	1009	9.61873	11.1061	-0.20744	0.75925	0.999568
FBtr0331756	FBgn0030740	-	1726	3.94188	4.52822	-0.20006	0.8709	0.999568
FBtr0331757	FBgn0052767	-	6993	3.14404	3.14754	-0.00160727	0.9973	0.999568
FBtr0331750	FBgn0052660	-	342	0.0813906	0.224959	-1.46673	1	1
FBtr0331751	FBgn0003371	-	4750	0.353196	0.182285	0.954269	1	1
FBtr0331752	FBgn0003371	-	4499	0.0656808	0	inf	1	1
FBtr0331753	FBgn0003371	-	5004	0.875902	0.591773	0.565726	0.6985	0.999568
FBtr0331758	FBgn0052767	-	11438	0.787606	0.492037	0.678708	0.48455	0.999568
FBtr0331759	FBgn0259170	-	3156	4.4832	2.85038	0.653376	0.3224	0.999568
TCONS_00365855	XLOC_062152	-	334	0	0.0440436	#NAME?	1	1
FBtr0346172	FBgn0267096	-	177	0	1.86674	#NAME?	1	1
FBtr0346173	FBgn0267097	-	1419	0.113227	0.0871206	0.378132	1	1
FBtr0346170	FBgn0052698	-	1775	1.38716	1.85995	-0.423135	0.5715	0.999568
FBtr0339392	FBgn0033431	-	1341	14.6466	13.7495	0.0911868	0.96535	0.999568
FBtr0346177	FBgn0267101	-	399	0	0.51307	#NAME?	1	1
FBtr0346174	FBgn0267098	-	347	0	0	0	1	1
FBtr0346175	FBgn0030078	-	1810	1.53147	0.848273	0.852316	0.4341	0.999568
FBtr0346178	FBgn0267103	-	386	0.708136	0.35342	1.00265	0.30645	0.999568
FBtr0346179	FBgn0267102	-	527	0.0515218	0.160533	-1.63962	1	1
FBtr0343522	FBgn0261954	-	7954	3.75308	5.48491	-0.547393	0.51525	0.999568
FBtr0343523	FBgn0000635	-	3475	0.0971298	0	inf	1	1
FBtr0343520	FBgn0000536	-	4575	0.122749	0.20988	-0.773853	1	1
FBtr0343521	FBgn0027601	-	2780	0.00185872	0.5341	-8.16666	0.2648	0.999568
FBtr0343526	FBgn0001316	-	5689	0.487054	0.507365	-0.0589428	0.97795	0.999568
FBtr0343527	FBgn0001316	-	2708	0.400903	0.135384	1.56619	0.6859	0.999568
FBtr0343524	FBgn0000635	-	3260	0.156488	0.0437645	1.83822	1	1
FBtr0343525	FBgn0027287	-	5007	1.80899	1.17531	0.622145	0.50585	0.999568
FBtr0343528	FBgn0004368	-	6060	2.63635	1.21729	1.11486	0.1362	0.999568
FBtr0343529	FBgn0004368	-	6059	3.34269	4.74585	-0.505656	0.30265	0.999568
TCONS_00366730	XLOC_065797	-	685	1.37009	1.08001	0.343226	0.9063	0.999568
FBtr0333250	FBgn0031544	-	1832	10.1672	11.8068	-0.215705	0.68115	0.999568
FBtr0076318	FBgn0036043	-	4515	9.13888	11.5011	-0.331679	0.3378	0.999568
FBtr0076319	FBgn0036043	-	5759	0.25666	0.0930385	1.46396	1	1
FBtr0330409	FBgn0030761	-	1971	14.766	14.1546	0.0610098	1	1
FBtr0076310	FBgn0052057	-	3531	0.0819967	0.0831678	-0.0204602	1	1
FBtr0076311	FBgn0036072	-	1096	0.0576966	0.058562	-0.0214783	1	1
FBtr0330401	FBgn0030613	-	8285	0.501193	0.301572	0.732867	0.3399	0.999568
FBtr0330400	FBgn0030613	-	8459	0	0.115623	#NAME?	1	1
FBtr0076314	FBgn0052054	-	1775	6.58961	7.57824	-0.201671	0.74825	0.999568
FBtr0076315	FBgn0052053	-	1618	3.08241	2.65798	0.213729	0.8315	0.999568
FBtr0076316	FBgn0036066	-	2112	5.40978	5.25231	0.0426187	0.9468	0.999568
FBtr0076317	FBgn0036043	-	5319	5.44738	6.87814	-0.336455	0.411	0.999568
FBtr0344582	FBgn0264482	-	296	0.159085	0.660755	-2.05432	0.49955	0.999568
FBtr0088809	FBgn0033271	-	1674	2.35325	1.31249	0.84235	1	1
FBtr0088801	FBgn0033280	-	605	0.209168	0.0442535	2.2408	1	1
FBtr0088800	FBgn0050376	-	941	0.0695725	0.0963717	-0.470092	1	1
FBtr0088803	FBgn0010109	-	2036	0.0846096	0.0768116	0.139498	1	1
FBtr0088802	FBgn0033279	-	817	0.16577	0.000185557	9.80311	1	1
FBtr0088805	FBgn0033274	-	739	50.4009	29.4303	0.776148	0.0284	0.999568
FBtr0088804	FBgn0033275	-	819	0.193061	0.139539	0.468392	1	1
FBtr0088807	FBgn0033272	-	1558	23.9278	24.1455	-0.0130631	0.9521	0.999568
FBtr0088806	FBgn0050373	-	610	47.7074	47.8092	-0.00307716	1	1
FBtr0073369	FBgn0046793	-	1463	0.204492	0.140935	0.537012	1	1
FBtr0073362	FBgn0035575	-	1958	1.09767	0.76487	0.521153	0.2309	0.999568
FBtr0073363	FBgn0035571	-	1173	4.41874	3.24589	0.44502	0.4283	0.999568
FBtr0073361	FBgn0042131	-	1354	1.11743	0.367614	1.60392	0.6072	0.999568
FBtr0073366	FBgn0035568	-	1142	0.0912241	0.111461	-0.289056	1	1
FBtr0073367	FBgn0035567	-	1188	0.0697046	0.0173972	2.0024	1	1
FBtr0073364	FBgn0035570	-	682	0.0354232	0.105803	-1.57861	1	1
FBtr0073365	FBgn0035569	-	641	0.307935	0.23754	0.374456	1	1
FBtr0333275	FBgn0051038	-	2015	0.439179	0.705567	-0.683974	0.69075	0.999568
FBtr0333274	FBgn0051038	-	2369	0.689755	0.531064	0.377199	0.77965	0.999568
FBtr0333277	FBgn0038256	-	1647	5.56564	4.57036	0.284242	0.7167	0.999568
FBtr0333276	FBgn0266064	-	2473	0.529331	0.831142	-0.650926	0.81885	0.999568
FBtr0333271	FBgn0025525	-	5146	2.92326	2.21009	0.403471	0.26795	0.999568
FBtr0333270	FBgn0004870	-	5337	0.00413574	0.178571	-5.43221	1	1
FBtr0333273	FBgn0005564	-	2357	0.118534	0.161345	-0.444843	1	1
FBtr0333272	FBgn0010417	-	2053	0.218375	0.745295	-1.771	0.43405	0.999568
FBtr0333279	FBgn0037347	-	1534	0.354242	0.643996	-0.862319	0.6809	0.999568
FBtr0333278	FBgn0037347	-	1574	1.36829	1.81708	-0.409251	0.6606	0.999568
TCONS_00983051	XLOC_223630	-	212	2.25594	0	inf	1	1
FBtr0330331	FBgn0263998	-	4364	0.344779	0.111365	1.63038	0.5379	0.999568
FBtr0273308	FBgn0050263	-	6387	5.69531e-05	5.15951e-05	0.142541	1	1
FBtr0273306	FBgn0036180	-	3179	27.8657	30.1344	-0.11292	0.60165	0.999568
FBtr0273307	FBgn0034022	-	3857	0.11758	0.0378441	1.6355	1	1
FBtr0273304	FBgn0036180	-	2167	0.383196	0.277066	0.467854	0.88765	0.999568
FBtr0273305	FBgn0036180	-	3276	0.830714	0.729754	0.186942	0.8982	0.999568
FBtr0273302	FBgn0034023	-	1800	0.129511	0.0874788	0.566074	1	1
FBtr0273303	FBgn0050203	-	2877	1.65133	0.610667	1.43517	0.00125	0.131915
FBtr0273301	FBgn0038676	-	5461	0.197717	0.135745	0.542535	1	1
TCONS_00097366	XLOC_004055	-	222	1.34638	3.21272	-1.25471	0.52765	0.999568
FBtr0299737	FBgn0259219	-	1043	0	0.179217	#NAME?	1	1
FBtr0299736	FBgn0259219	-	968	1.6014	1.47351	0.12008	0.88045	0.999568
FBtr0073098	FBgn0035422	-	656	1.90717	1.02232	0.899585	0.79865	0.999568
FBtr0333189	FBgn0058198	-	1567	0.626346	0.579085	0.113184	0.8405	0.999568
FBtr0333188	FBgn0039668	-	3704	0.487771	0.181118	1.42928	0.41025	0.999568
FBtr0073094	FBgn0035425	-	1694	16.4582	16.6313	-0.0151021	0.97005	0.999568
FBtr0073095	FBgn0035422	-	887	17.9079	15.3612	0.221305	0.8163	0.999568
FBtr0333185	FBgn0026080	-	2368	0.14262	0.126713	0.17061	1	1
FBtr0073097	FBgn0035422	-	547	585.018	607.954	-0.0554818	0.8013	0.999568
FBtr0073090	FBgn0035431	-	958	0.180389	0	inf	1	1
FBtr0333182	FBgn0000719	-	5256	0.655814	0.391121	0.745673	0.58145	0.999568
FBtr0073092	FBgn0035426	-	954	0.181396	0.000392246	8.85317	1	1
FBtr0073093	FBgn0035425	-	1577	43.8949	48.4998	-0.143926	0.5213	0.999568
TCONS_00000233	XLOC_000138	-	503	4.85215e-06	0	inf	1	1
TCONS_00939787	XLOC_189716	-	223	2.15011	0	inf	0.24295	0.999568
FBtr0330332	FBgn0263998	-	5956	1.35971	0.907115	0.583941	0.48535	0.999568
FBtr0072949	FBgn0035358	-	934	16.2406	10.0967	0.685721	0.01545	0.715432
FBtr0072948	FBgn0027082	-	1509	8.50848	10.16	-0.255924	0.49775	0.999568
FBtr0332586	FBgn0023508	-	3619	0.698023	1.29224	-0.888528	0.40915	0.999568
FBtr0332587	FBgn0023522	-	1544	0	0	0	1	1
FBtr0332580	FBgn0023511	-	3883	0.73841	0.63119	0.226348	0.926	0.999568
FBtr0332581	FBgn0052803	-	905	0.884836	0.851873	0.0547721	0.9717	0.999568
FBtr0332582	FBgn0052803	-	800	0.319918	0.216686	0.562098	1	1
FBtr0332583	FBgn0000117	-	3211	0.423284	0.296369	0.51423	0.8581	0.999568
FBtr0072943	FBgn0020509	-	479	0.480445	0.119977	2.00161	0.58945	0.999568
FBtr0332588	FBgn0023522	-	1765	1.71554	2.11778	-0.303893	0.79475	0.999568
FBtr0332589	FBgn0040340	-	1656	3.5	7.45162	-1.0902	0.3092	0.999568
TCONS_00539599	XLOC_105842	-	201	0.691107	0	inf	1	1
FBtr0332638	FBgn0041775	-	2866	9.19541	22.7848	-1.30909	0.25955	0.999568
FBtr0332639	FBgn0041775	-	2899	6.73613	9.64724	-0.518196	0.7491	0.999568
FBtr0332636	FBgn0041775	-	2908	168.976	211.213	-0.321885	0.2883	0.999568
FBtr0332637	FBgn0041775	-	4137	45.0977	55.269	-0.293417	0.55795	0.999568
FBtr0332634	FBgn0036291	-	1027	1.50421	2.19848	-0.547503	0.64225	0.999568
FBtr0332635	FBgn0041775	-	4155	35.5709	28.4474	0.322399	0.60015	0.999568
FBtr0332632	FBgn0040010	-	5997	1.33553	0.931358	0.52	0.61855	0.999568
FBtr0332633	FBgn0064225	-	1945	24.8354	27.0764	-0.124634	0.9572	0.999568
FBtr0332630	FBgn0040010	-	1663	2.74768	2.73342	0.00750687	0.99535	0.999568
FBtr0332631	FBgn0040010	-	1364	110.493	127.006	-0.200939	1	1
FBtr0308831	FBgn0003714	-	1596	0.595233	0.579877	0.0377071	0.9792	0.999568
FBtr0308830	FBgn0030640	-	2306	0.825004	0.609487	0.436807	0.7273	0.999568
FBtr0308833	FBgn0262518	-	2043	33.9518	40.7858	-0.264576	1	1
FBtr0308832	FBgn0262518	-	1068	1.02194	0.460931	1.14869	0.7552	0.999568
FBtr0308835	FBgn0263397	-	2485	0.089182	0.338274	-1.92337	1	1
FBtr0308834	FBgn0263397	-	2524	0.497812	5.19884e-05	13.2251	0.21475	0.999568
FBtr0308837	FBgn0263397	-	4152	0.273455	0.170767	0.679274	1	1
FBtr0308836	FBgn0263397	-	2526	5.2727	4.23812	0.315119	0.3296	0.999568
FBtr0308839	FBgn0030809	-	6241	11.7566	10.042	0.227425	0.59265	0.999568
FBtr0308838	FBgn0027601	-	2980	0	0.0687504	#NAME?	1	1
Novel000048.1	Novel000048	-	2641	0.289584	0.165747	0.805001	1	1
FBtr0345502	FBgn0263030	-	765	0.150998	0.0957219	0.657609	1	1
FBtr0345503	FBgn0034755	-	692	0.88427	0.661168	0.419468	0.715	0.999568
FBtr0345501	FBgn0266807	-	481	2.14637	0.915382	1.22945	0.098	0.999568
FBtr0345506	FBgn0040359	-	2801	8.96421e-05	9.09643e-05	-0.0211241	1	1
FBtr0332884	FBgn0025692	-	1011	3.69142	3.34807	0.140848	0.86955	0.999568
FBtr0345504	FBgn0034753	-	1177	9.13952	11.7578	-0.363428	0.82855	0.999568
TCONS_00458418	XLOC_113593	-	219	0.491766	0	inf	1	1
FBtr0080562	FBgn0019890	-	4809	14.0995	10.949	0.364847	0.19515	0.999568
FBtr0080563	FBgn0028920	-	885	456.947	466.434	-0.0296459	1	1
FBtr0080560	FBgn0028938	-	2433	0.29387	0.0619796	2.24531	1	1
FBtr0080561	FBgn0019890	-	4021	8.48827	7.3124	0.215125	0.58985	0.999568
FBtr0080566	FBgn0260407	-	707	56.0696	65.2875	-0.219588	0.42825	0.999568
TCONS_01001793	XLOC_223845	-	202	0.672661	0	inf	1	1
FBtr0080564	FBgn0053306	-	800	68.5561	62.9829	0.122325	0.91	0.999568
FBtr0080565	FBgn0053307	-	586	34.5129	39.4367	-0.192405	1	1
FBtr0339941	FBgn0034776	-	1519	0.0494567	0.065331	-0.401602	1	1
FBtr0339940	FBgn0000633	-	5879	0.38111	0.478039	-0.326919	0.61135	0.999568
FBtr0339943	FBgn0265496	-	2633	0.185313	0.11608	0.674849	1	1
FBtr0080569	FBgn0001961	-	1666	11.533	13.5154	-0.228836	0.56495	0.999568
FBtr0339945	FBgn0030468	-	1987	1.06874	0.483756	1.14356	0.5638	0.999568
FBtr0339944	FBgn0265497	-	1591	0.570289	0.469558	0.280389	0.5761	0.999568
FBtr0339946	FBgn0030467	-	1780	0.595124	0.595669	-0.00131839	0.98905	0.999568
FBtr0112845	FBgn0004875	-	7623	0	0	0	1	1
FBtr0112844	FBgn0004875	-	7323	1.224	0.878727	0.478115	0.59145	0.999568
FBtr0112847	FBgn0004956	-	2443	0.0616707	5.72787e-05	10.0724	1	1
FBtr0112846	FBgn0004914	-	3600	6.45173	4.17389	0.628296	0.20225	0.999568
FBtr0112841	FBgn0004174	-	359	0.0981944	0.100856	-0.0385794	1	1
TCONS_00505067	XLOC_115569	-	493	2.18578	2.03798	0.10101	0.8594	0.999568
FBtr0112843	FBgn0004860	-	6020	2.15331	2.00814	0.100697	0.8207	0.999568
FBtr0346741	FBgn0267412	-	811	0	0	0	1	1
Novel000149.1	Novel000149	-	958	0	0.156358	#NAME?	1	1
FBtr0346740	FBgn0267411	-	942	0	0	0	1	1
FBtr0113464	FBgn0053519	-	13189	0.499481	0.00247786	7.65519	0.18355	0.999568
FBtr0113465	FBgn0053542	-	2221	0.656774	0.323418	1.022	0.04325	0.999568
FBtr0334339	FBgn0039663	-	3479	7.47016	7.29137	0.0349489	0.90285	0.999568
FBtr0113461	FBgn0086610	-	660	0	0	0	1	1
FBtr0332422	FBgn0033607	-	2849	3.09378	3.58052	-0.210797	0.77855	0.999568
FBtr0334335	FBgn0262167	-	5610	0	0	0	1	1
FBtr0334334	FBgn0003134	-	3210	1.19805	0.901951	0.409562	0.77445	0.999568
FBtr0334337	FBgn0039205	-	563	39.41	29.9583	0.395605	1	1
FBtr0334336	FBgn0266758	-	2963	0.440939	0.138365	1.6721	0.56825	0.999568
FBtr0334331	FBgn0037635	-	2072	1.58942	1.324	0.263591	0.8564	0.999568
FBtr0113469	FBgn0053556	-	6298	0.0648703	0	inf	1	1
FBtr0334333	FBgn0039201	-	2323	0.0162924	0.0429355	-1.39797	1	1
FBtr0334332	FBgn0037633	-	2186	1.28603	2.65004	-1.04309	0.60335	0.999568
FBtr0332420	FBgn0041174	-	946	14.3035	15.6476	-0.129575	1	1
FBtr0332427	FBgn0039089	-	3278	0.645048	0.367643	0.811101	0.0881	0.999568
FBtr0112594	FBgn0085398	-	1800	0.000970871	0.000476226	1.02763	1	1
FBtr0112593	FBgn0085397	-	4859	0.740153	0.602597	0.29663	0.44245	0.999568
FBtr0112592	FBgn0085396	-	1703	0.139502	0.113752	0.294396	1	1
FBtr0089323	FBgn0036362	-	876	79.0289	24.4729	1.6912	5e-05	0.0107714
FBtr0089322	FBgn0036290	-	1180	7.49936	9.15387	-0.287615	0.6465	0.999568
FBtr0089321	FBgn0036290	-	1115	67.4123	71.8269	-0.0915124	1	1
FBtr0089320	FBgn0000529	-	2012	0.162398	0.070382	1.20626	1	1
FBtr0089327	FBgn0005561	-	4693	0	0.000872969	#NAME?	1	1
FBtr0089324	FBgn0002565	-	2304	4.65055	15.8882	-1.77248	1	1
FBtr0089329	FBgn0025885	-	1986	90.6032	97.8068	-0.110374	0.5552	0.999568
FBtr0089328	FBgn0005561	-	4102	0	0	0	1	1
FBtr0346909	FBgn0266901	-	3150	0.479979	0.354911	0.435512	0.4222	0.999568
FBtr0346908	FBgn0263413	-	7596	0.334074	0.15064	1.14907	1	1
FBtr0088492	FBgn0050001	-	1327	9.93437	12.06	-0.279729	0.2962	0.999568
FBtr0088493	FBgn0033446	-	1047	51.9188	44.335	0.227811	1	1
FBtr0083143	FBgn0000047	-	1595	12.9811	9.5996	0.435371	0.08955	0.999568
FBtr0083142	FBgn0028984	-	1518	7.89582	8.59025	-0.12161	0.88475	0.999568
FBtr0083145	FBgn0038342	-	881	0.427056	0.307132	0.475568	1	1
FBtr0344324	FBgn0259834	-	3414	8.45375	6.22799	0.440823	0.364	0.999568
FBtr0083147	FBgn0038344	-	6970	11.9412	12.9859	-0.121002	0.53655	0.999568
FBtr0088495	FBgn0027589	-	4116	0.536206	0.324452	0.724784	0.36465	0.999568
FBtr0344329	FBgn0266390	-	1120	0.224161	0.153523	0.546079	1	1
FBtr0083148	FBgn0038345	-	1019	0.146465	0.0651768	1.16812	1	1
TCONS_00063287	XLOC_014386	-	234	0	1.09782	#NAME?	1	1
FBtr0088499	FBgn0023143	-	4343	130.094	147.216	-0.178381	0.3601	0.999568
FBtr0082230	FBgn0037809	-	1001	16.7697	20.0649	-0.258816	0.3105	0.999568
FBtr0082231	FBgn0037810	-	4775	61.5451	69.2657	-0.170498	0.35885	0.999568
FBtr0082232	FBgn0037810	-	4676	0.199489	0.0970569	1.0394	1	1
FBtr0082233	FBgn0037811	-	2407	2.89713	3.44613	-0.250351	0.402	0.999568
FBtr0082234	FBgn0037812	-	660	0.147641	0.0390602	1.91832	1	1
FBtr0082235	FBgn0051406	-	636	0.03885	0.0411672	-0.0835816	1	1
FBtr0082236	FBgn0051406	-	1010	0.0639717	6.46723e-07	16.5939	1	1
FBtr0082237	FBgn0015396	-	3860	59.8531	68.1711	-0.187732	0.31615	0.999568
FBtr0345058	FBgn0261289	-	686	0.20995	0.10495	1.00034	1	1
FBtr0082239	FBgn0266717	-	15402	16.6225	14.519	0.195198	0.55115	0.999568
FBtr0310148	FBgn0033372	-	2279	1.21041	0.855611	0.500472	0.58875	0.999568
FBtr0310149	FBgn0032387	-	2300	10.0116	13.0958	-0.387435	0.4206	0.999568
FBtr0310140	FBgn0033996	-	1993	1.78484	1.92573	-0.109611	0.9146	0.999568
FBtr0310141	FBgn0033502	-	1705	2.74761	2.45086	0.164893	0.83085	0.999568
FBtr0310142	FBgn0033502	-	2487	0.515181	0.590647	-0.197215	0.88825	0.999568
FBtr0310143	FBgn0033373	-	1708	5.78338	4.78191	0.274325	0.81105	0.999568
FBtr0310144	FBgn0033373	-	1793	1.07902	0.737454	0.549091	0.8555	0.999568
FBtr0310145	FBgn0033373	-	1749	0.733782	0.420502	0.803239	0.8123	0.999568
FBtr0310146	FBgn0033373	-	1402	4.59287	6.2454	-0.443399	0.7178	0.999568
FBtr0310147	FBgn0033372	-	2351	8.98007	9.65842	-0.105061	0.7179	0.999568
FBtr0084690	FBgn0004885	-	5368	9.2754	6.15788	0.590975	0.03865	0.999568
FBtr0084691	FBgn0003719	-	3359	1.24102	0.785944	0.659028	0.07845	0.999568
FBtr0084692	FBgn0000140	-	6338	38.1987	44.3825	-0.216467	0.2515	0.999568
FBtr0084693	FBgn0040600	-	761	7.76206	7.50116	0.0493261	1	1
FBtr0084697	FBgn0039225	-	3003	0.215839	0.0225919	3.25608	1	1
FBtr0084698	FBgn0039228	-	927	0.801298	0.289291	1.46982	0.6673	0.999568
FBtr0088146	FBgn0082585	-	2795	3.41444	2.24182	0.60698	0.25805	0.999568
FBtr0088140	FBgn0000581	-	9325	7.09307	9.33323	-0.395968	0.268	0.999568
FBtr0088141	FBgn0015872	-	1745	18.7154	15.4558	0.276075	0.28615	0.999568
FBtr0088142	FBgn0015872	-	1444	0.792527	0.88645	-0.16158	0.9035	0.999568
TCONS_01022786	XLOC_196643	-	222	0	1.89884	#NAME?	0.21775	0.999568
FBtr0100109	FBgn0054054	-	545	8.60669	7.99987	0.105483	0.77785	0.999568
FBtr0100106	FBgn0054051	-	771	0.0878477	0.0272985	1.68618	1	1
Novel000135.1	Novel000135	-	567	0.360655	0.299168	0.269662	0.85625	0.999568
FBtr0342587	FBgn0265794	-	316	0.543581	0.27397	0.988476	1	1
FBtr0342586	FBgn0265793	-	671	0.288521	0.182457	0.661124	1	1
FBtr0342585	FBgn0265792	-	1049	0.222553	0.083109	1.42107	1	1
FBtr0342584	FBgn0051870	-	537	0.400283	0.230865	0.793972	0.76945	0.999568
FBtr0342583	FBgn0051870	-	1097	0.114896	0.10846	0.0831662	1	1
FBtr0342582	FBgn0265791	-	533	0	0.050561	#NAME?	1	1
FBtr0342581	FBgn0032391	-	1532	21.2545	27.869	-0.390893	1	1
FBtr0342580	FBgn0032390	-	987	9.8675	10.9543	-0.150747	0.80895	0.999568
FBtr0342589	FBgn0265796	-	370	0.28929	0.192348	0.588802	1	1
FBtr0342588	FBgn0265797	-	329	0.74867	0.132807	2.495	1	1
FBtr0087347	FBgn0023441	-	4375	1.15362	0.527986	1.1276	0.3167	0.999568
FBtr0087346	FBgn0023441	-	5512	6.46042	5.98352	0.110635	0.7621	0.999568
FBtr0087345	FBgn0023441	-	3671	0.670095	0	inf	0.1209	0.999568
FBtr0087344	FBgn0023441	-	5256	1.64579	3.0847	-0.90635	0.1171	0.999568
FBtr0306338	FBgn0264857	-	1733	2.43262e-06	0	inf	1	1
FBtr0306339	FBgn0264857	-	1825	0	0.0301513	#NAME?	1	1
FBtr0087341	FBgn0262512	-	659	193.309	214.558	-0.150464	0.4424	0.999568
FBtr0345582	FBgn0034288	-	1182	0.202079	0.218196	-0.110709	1	1
FBtr0306335	FBgn0085423	-	4936	0	0.0454836	#NAME?	1	1
FBtr0306336	FBgn0031968	-	1264	3.39755	4.32826	-0.349291	0.6768	0.999568
FBtr0306337	FBgn0000014	-	5269	0.292629	0.198858	0.55733	1	1
FBtr0306330	FBgn0004919	-	3725	3.55811e-05	2.25891e-05	0.655487	1	1
FBtr0306331	FBgn0052296	-	7755	3.6724	3.82914	-0.0602954	0.82565	0.999568
FBtr0087349	FBgn0034033	-	735	1.19655	1.01472	0.237791	0.93085	0.999568
FBtr0306333	FBgn0085423	-	6208	2.59851	1.88756	0.461158	0.4415	0.999568
FBtr0085279	FBgn0039576	-	503	0	0.0553977	#NAME?	1	1
FBtr0085278	FBgn0004171	-	1066	0.0197339	0.0407477	-1.04605	1	1
FBtr0085271	FBgn0053213	-	1279	19.774	25.8674	-0.387534	0.2834	0.999568
FBtr0085270	FBgn0039557	-	1246	18.6986	21.7888	-0.220662	0.35675	0.999568
FBtr0085272	FBgn0039554	-	2491	27.7024	32.1558	-0.215071	0.2739	0.999568
FBtr0085277	FBgn0002865	-	1319	0.123247	0.127307	-0.0467592	1	1
FBtr0309316	FBgn0039942	-	1451	27.5726	30.4669	-0.144011	0.70045	0.999568
TCONS_00707053	XLOC_134471	-	346	0.443444	0.465733	-0.0707522	1	1
FBtr0309312	FBgn0264712	-	2443	0.938452	1.2869	-0.45555	1	1
FBtr0344268	FBgn0037448	-	3672	0	0	0	1	1
FBtr0309319	FBgn0003261	-	4362	1.71432	1.51012	0.18297	0.92635	0.999568
FBtr0309318	FBgn0037395	-	1089	0.000976739	0.00101726	-0.0586471	1	1
FBtr0344269	FBgn0037448	-	4904	0.151729	0	inf	1	1
TCONS_00554193	XLOC_093566	-	994	0.956619	0.491868	0.959673	0.4155	0.999568
FBtr0344468	FBgn0265313	-	1676	6.71949	4.40975	0.607654	0.3237	0.999568
FBtr0329908	FBgn0003130	-	2458	0.130368	0.172658	-0.405325	1	1
FBtr0329909	FBgn0265991	-	1963	3.78766	2.98761	0.342315	0.71885	0.999568
FBtr0329900	FBgn0015558	-	3078	0.814376	0.770883	0.0791831	0.91495	0.999568
FBtr0329901	FBgn0015558	-	7199	0.923153	1.13213	-0.294402	0.49005	0.999568
FBtr0329902	FBgn0015558	-	3853	0.000100534	0.238837	-11.2141	1	1
FBtr0329903	FBgn0015558	-	6642	0.023587	0	inf	1	1
FBtr0329904	FBgn0263971	-	450	0.133744	0.137434	-0.0392678	1	1
FBtr0329905	FBgn0031505	-	762	9.00721	9.37428	-0.0576269	0.93755	0.999568
FBtr0329906	FBgn0015600	-	4265	3.45359	2.16838	0.67148	0.28405	0.999568
FBtr0306802	FBgn0033097	-	1278	0.669523	0.473455	0.499907	0.35705	0.999568
FBtr0306800	FBgn0036717	-	2980	0.0995913	0.0567074	0.812484	1	1
FBtr0306801	FBgn0030791	-	1792	0	0.0826046	#NAME?	1	1
FBtr0306806	FBgn0037565	-	5535	0.656187	0.169605	1.95193	0.2712	0.999568
FBtr0306807	FBgn0017558	-	2732	35.2026	23.8835	0.559671	0.01295	0.642778
FBtr0306804	FBgn0051464	-	741	0.662902	0.481473	0.46134	0.47475	0.999568
FBtr0306805	FBgn0037565	-	5550	1.10955	1.36933	-0.303496	0.6213	0.999568
FBtr0071145	FBgn0000427	-	5696	15.7356	22.0409	-0.486151	0.42565	0.999568
FBtr0071146	FBgn0000427	-	3737	17.9009	21.1942	-0.243637	0.7464	0.999568
FBtr0071147	FBgn0000427	-	3751	172.808	218.522	-0.33861	0.13635	0.999568
FBtr0071140	FBgn0029971	-	487	223.904	235.864	-0.0750737	0.7213	0.999568
FBtr0071141	FBgn0029971	-	509	4.45756	5.63318	-0.337696	0.8267	0.999568
FBtr0071142	FBgn0029970	-	2581	32.5653	37.8204	-0.215831	0.27665	0.999568
FBtr0071143	FBgn0029969	-	1517	124.354	135.751	-0.126502	1	1
FBtr0079791	FBgn0032077	-	864	16.1441	19.9347	-0.304278	1	1
FBtr0079790	FBgn0032078	-	1931	6.8133	5.51479	0.305047	0.6079	0.999568
FBtr0346772	FBgn0267433	-	13680	0	0	0	1	1
FBtr0346773	FBgn0267489	-	3744	0	0	0	1	1
FBtr0079795	FBgn0267252	-	2799	0.773882	0.421482	0.876642	0.54495	0.999568
FBtr0079797	FBgn0267252	-	12225	0.303142	0.189427	0.678351	1	1
FBtr0079796	FBgn0267252	-	1019	18.8943	9.39374	1.00818	1	1
FBtr0079799	FBgn0010314	-	1147	36.9993	46.3593	-0.32536	0.12855	0.999568
FBtr0343720	FBgn0266160	-	324	2.96157	2.5556	0.212701	0.86475	0.999568
FBtr0343721	FBgn0001987	-	4468	1.28475	1.16267	0.144043	0.8524	0.999568
FBtr0343722	FBgn0001989	-	992	2.03909	2.84671	-0.481376	0.6807	0.999568
FBtr0343723	FBgn0266161	-	372	0.567973	0.101303	2.48715	1	1
FBtr0343724	FBgn0266162	-	552	1.00706	0.890859	0.17688	0.88535	0.999568
FBtr0343725	FBgn0028858	-	1023	0.0867383	0.0920373	-0.0855482	1	1
FBtr0343726	FBgn0028644	-	4924	0.148436	0.223311	-0.589212	1	1
FBtr0343727	FBgn0028644	-	4695	0.308903	0.080949	1.93207	1	1
FBtr0343728	FBgn0013433	-	2870	7.89341e-05	2.90031e-05	1.44444	1	1
FBtr0343729	FBgn0266165	-	840	0.213438	0.054924	1.95831	1	1
FBtr0344340	FBgn0039531	-	1375	4.3642	4.55747	-0.0625178	0.92935	0.999568
FBtr0344347	FBgn0038532	-	5857	0.507315	0.559205	-0.140496	0.90455	0.999568
FBtr0345105	FBgn0266696	-	5863	0.474928	0.225726	1.07314	0.76275	0.999568
FBtr0336949	FBgn0016930	-	2826	0.211588	0.147222	0.523269	1	1
FBtr0077420	FBgn0031623	-	591	4.11548	5.80942	-0.497336	0.39725	0.999568
FBtr0077423	FBgn0000227	-	1352	0.149688	0.107089	0.483149	1	1
FBtr0077422	FBgn0031622	-	1685	0.209121	0.0819516	1.35149	1	1
FBtr0077425	FBgn0028482	-	2730	5.6468	3.57939	0.65772	0.0156	0.72005
FBtr0077427	FBgn0020762	-	3846	0.844417	0.925148	-0.131727	0.8774	0.999568
FBtr0077426	FBgn0020762	-	4181	4.9131	4.38104	0.16536	1	1
FBtr0077429	FBgn0026319	-	2361	2.4164	2.4175	-0.000657494	0.994	0.999568
FBtr0077428	FBgn0031596	-	943	0.0344353	0.0236135	0.544274	1	1
TCONS_00065582	XLOC_018917	-	201	0	0	0	1	1
FBtr0345103	FBgn0266696	-	6398	2.11262	0.973629	1.11759	0.36945	0.999568
FBtr0343898	FBgn0266234	-	443	0.0687375	0	inf	1	1
FBtr0343899	FBgn0266234	-	693	0	0.0709879	#NAME?	1	1
FBtr0343892	FBgn0266229	-	1275	0.239717	0.148476	0.691102	1	1
FBtr0343893	FBgn0266230	-	606	0.0833341	0.0834026	-0.00118593	1	1
FBtr0343890	FBgn0266227	-	2517	1.98019	0.443179	2.15968	0.0173	0.759662
FBtr0343891	FBgn0266228	-	811	0.53092	0.259504	1.03274	0.1645	0.999568
FBtr0343896	FBgn0266233	-	766	0.0906369	0.0921147	-0.0233329	1	1
FBtr0343897	FBgn0266226	-	501	0	0	0	1	1
FBtr0343894	FBgn0266231	-	616	0.122228	0.126938	-0.0545572	1	1
FBtr0343895	FBgn0266232	-	1115	0.169769	0.171023	-0.0106182	1	1
FBtr0344048	FBgn0266318	-	532	0.203033	0.0537364	1.91774	1	1
FBtr0344041	FBgn0266312	-	1351	0.669236	0.654722	0.0316329	0.8899	0.999568
FBtr0344042	FBgn0266313	-	814	0.779962	0.228923	1.76854	0.59005	0.999568
FBtr0344043	FBgn0266313	-	971	0	0.224775	#NAME?	1	1
FBtr0344044	FBgn0266314	-	272	0	0	0	1	1
FBtr0344045	FBgn0266315	-	951	0.457657	0.185061	1.30627	0.36385	0.999568
TCONS_00790782	XLOC_150930	-	204	0	1.38089	#NAME?	1	1
TCONS_00439055	XLOC_126816	-	937	0.534442	0.499808	0.0966603	0.945	0.999568
FBtr0301124	FBgn0026083	-	8145	2.24827	1.81994	0.304923	0.8039	0.999568
FBtr0301125	FBgn0031920	-	1730	0.464017	0.380821	0.285065	0.90525	0.999568
FBtr0301126	FBgn0024814	-	1230	3.44738	3.60985	-0.0664398	0.9685	0.999568
FBtr0301127	FBgn0033687	-	728	0.0972466	0	inf	1	1
FBtr0301121	FBgn0267861	-	1102	0.563363	0.778662	-0.466933	0.8788	0.999568
FBtr0344348	FBgn0266405	-	249	41.108	59.3479	-0.529779	0.76545	0.999568
FBtr0301128	FBgn0031976	-	1493	0	0	0	1	1
FBtr0301129	FBgn0031976	-	1265	0.00714553	0.0511652	-2.84005	1	1
FBtr0337104	FBgn0020379	-	3861	0.0480022	0.0367651	0.384765	1	1
FBtr0336665	FBgn0033081	-	939	134.753	180.279	-0.419914	1	1
FBtr0331991	FBgn0014417	-	2642	107.222	118.903	-0.149182	0.42815	0.999568
FBtr0331204	FBgn0031251	-	4292	0.000795696	0.102398	-7.00776	1	1
FBtr0081011	FBgn0032634	-	516	88.8607	109.682	-0.303708	0.60435	0.999568
FBtr0081010	FBgn0051803	-	929	0.164811	0.215386	-0.386109	1	1
FBtr0081013	FBgn0015609	-	10412	0.187171	0.208769	-0.157551	1	1
FBtr0081015	FBgn0015609	-	13384	0.643688	0.460125	0.484337	0.241	0.999568
FBtr0081014	FBgn0015609	-	10409	0.417047	0.278566	0.582189	0.5404	0.999568
FBtr0081017	FBgn0015609	-	10412	0.0895595	0.0603137	0.57036	1	1
FBtr0081016	FBgn0015609	-	13228	0.232358	8.21988e-05	11.4649	1	1
FBtr0081019	FBgn0015609	-	10409	0.0137578	0.146039	-3.40803	1	1
FBtr0081018	FBgn0015609	-	10412	0.110897	0.123372	-0.153792	1	1
FBtr0071968	FBgn0034827	-	2499	0.135408	0.121995	0.150491	1	1
FBtr0071969	FBgn0034829	-	2988	0.0929324	0.0902878	0.0416496	1	1
FBtr0071966	FBgn0034820	-	989	0.195729	0.0881303	1.15115	1	1
FBtr0071967	FBgn0050192	-	373	0	0	0	1	1
FBtr0071964	FBgn0045483	-	1104	0.171119	0.116096	0.559687	1	1
FBtr0071965	FBgn0045482	-	1101	0.152479	0.096354	0.662195	1	1
FBtr0071963	FBgn0034816	-	1670	6.06827	5.89701	0.0413013	1	1
FBtr0071960	FBgn0021979	-	1944	3.5752	3.23009	0.14645	0.86565	0.999568
FBtr0071961	FBgn0021979	-	1451	1.14308	0.376245	1.60319	0.53445	0.999568
FBtr0074301	FBgn0030752	-	1261	7.56935	8.79441	-0.216417	0.8507	0.999568
FBtr0074300	FBgn0261609	-	1200	132.604	140.64	-0.0848905	1	1
FBtr0074303	FBgn0030749	-	1731	0	0.000305911	#NAME?	1	1
FBtr0074302	FBgn0030749	-	1233	1.86653	3.91582	-1.06895	1	1
FBtr0074305	FBgn0010416	-	2297	5.75769	5.18485	0.151189	0.77145	0.999568
FBtr0074304	FBgn0030746	-	3518	0.119011	0.000761185	7.28863	1	1
FBtr0074307	FBgn0030744	-	1594	24.1444	30.6102	-0.342323	0.24615	0.999568
FBtr0074306	FBgn0030744	-	1406	5.25053	4.5268	0.213971	0.78975	0.999568
FBtr0074309	FBgn0030744	-	1380	0	0.0957352	#NAME?	1	1
FBtr0074308	FBgn0030744	-	1608	24.5152	32.7889	-0.419533	0.1418	0.999568
FBtr0332037	FBgn0031739	-	1297	1.18813	0.92445	0.36203	0.7848	0.999568
FBtr0332030	FBgn0069354	-	1069	2.62423e-05	1.20965e-05	1.1173	1	1
FBtr0332031	FBgn0264352	-	1157	0.125682	0.146078	-0.216957	1	1
FBtr0332032	FBgn0264352	-	1182	0.000528239	0.000551718	-0.0627407	1	1
FBtr0332033	FBgn0032913	-	1353	67.1063	58.7577	0.191669	1	1
FBtr0330065	FBgn0035715	-	1189	9.65019	8.88551	0.119104	0.87005	0.999568
FBtr0334543	FBgn0267698	-	4937	0	0	0	1	1
TCONS_00126476	XLOC_031429	-	201	0	1.50174	#NAME?	1	1
TCONS_00692072	XLOC_162210	-	202	0	0	0	1	1
TCONS_00692075	XLOC_162218	-	221	2.31679	0.917619	1.33616	0.5581	0.999568
FBtr0345339	FBgn0011260	-	3440	0.000569048	0.000793784	-0.480196	1	1
FBtr0334544	FBgn0267698	-	4827	0.5395	0.303526	0.829805	0.6817	0.999568
TCONS_01001433	XLOC_222862	-	204	0	0.7396	#NAME?	1	1
FBtr0334545	FBgn0261641	-	3589	7.85033	10.1762	-0.374379	1	1
FBtr0080440	FBgn0032482	-	2153	3.65991	2.32495	0.654611	0.61075	0.999568
FBtr0334548	FBgn0002413	-	4156	25.1486	28.1107	-0.160643	0.6125	0.999568
FBtr0334549	FBgn0039844	-	2894	0.389044	0.318998	0.286387	0.83725	0.999568
TCONS_00038104	XLOC_013338	-	203	1.45478	0	inf	1	1
FBtr0087493	FBgn0261823	-	6643	11.8683	13.1582	-0.148847	0.4851	0.999568
Novel000095.1	Novel000095	-	1697	2.8766	3.5775	-0.314587	0.58455	0.999568
FBtr0080760	FBgn0001986	-	3585	25.0157	27.3605	-0.129266	0.50135	0.999568
FBtr0080761	FBgn0028507	-	1582	28.9229	31.7931	-0.136504	0.6232	0.999568
FBtr0080763	FBgn0041627	-	2304	23.3801	26.7319	-0.193279	0.3455	0.999568
FBtr0080764	FBgn0001990	-	1691	22.173	26.4744	-0.255797	1	1
FBtr0080765	FBgn0001987	-	4095	8.1636	7.51904	0.118657	0.6823	0.999568
FBtr0080767	FBgn0001987	-	4186	0	0	0	1	1
FBtr0080768	FBgn0001987	-	3975	7.25734	5.25089	0.466879	0.15185	0.999568
FBtr0080769	FBgn0001987	-	4007	0.064555	0.528836	-3.03422	0.28665	0.999568
Novel000077.1	Novel000077	-	201	1.38221	0	inf	1	1
FBtr0345334	FBgn0031684	-	630	1.44758	1.02698	0.495235	0.87185	0.999568
FBtr0335268	FBgn0264958	-	199	0	1.64702	#NAME?	1	1
FBtr0335269	FBgn0022288	-	1811	21.5338	22.5535	-0.0667465	0.85745	0.999568
FBtr0335264	FBgn0264956	-	1602	0.110439	0.0997448	0.146936	1	1
FBtr0335265	FBgn0264957	-	849	0.026253	0	inf	1	1
FBtr0335266	FBgn0033047	-	2266	6.32919	5.59059	0.17902	0.6191	0.999568
FBtr0335267	FBgn0264958	-	318	4.88631	3.5215	0.472558	0.41095	0.999568
FBtr0335260	FBgn0033020	-	672	2.70753e-05	0.0071	-8.0347	1	1
FBtr0335261	FBgn0261429	-	2652	0.292519	0.565977	-0.952215	0.59415	0.999568
FBtr0335262	FBgn0259247	-	3645	0.149146	0	inf	1	1
FBtr0335263	FBgn0050438	-	2226	0.975794	2.68311	-1.45926	0.0923	0.999568
FBtr0334132	FBgn0264748	-	1240	3.82338	2.04413	0.903362	0.0196	0.818629
FBtr0334131	FBgn0264747	-	1406	1.98005	3.05428	-0.625299	0.628	0.999568
FBtr0334130	FBgn0264747	-	1247	86.7006	112.901	-0.380939	1	1
FBtr0334137	FBgn0264815	-	4561	0.332689	0.202953	0.713025	1	1
FBtr0334136	FBgn0264815	-	3862	2.36351	1.61088	0.553083	0.7157	0.999568
FBtr0334135	FBgn0264815	-	4703	0.395741	0.161566	1.29243	0.7357	0.999568
FBtr0334134	FBgn0264744	-	1273	13.2099	15.7622	-0.25485	0.31385	0.999568
FBtr0334139	FBgn0264815	-	4203	0	0	0	1	1
FBtr0334138	FBgn0264815	-	5563	0	0	0	1	1
FBtr0074875	FBgn0261283	-	3818	44.3478	39.8907	0.152811	0.54495	0.999568
FBtr0074874	FBgn0261283	-	3951	1.74161	1.76539	-0.0195628	0.9882	0.999568
FBtr0074873	FBgn0261283	-	3841	16.6311	18.3866	-0.144775	0.7524	0.999568
FBtr0074872	FBgn0036932	-	759	17.8198	17.6249	0.0158702	0.9629	0.999568
FBtr0074871	FBgn0036934	-	3243	0.880687	0.611985	0.525132	0.33705	0.999568
FBtr0074870	FBgn0036935	-	3522	6.10357	3.35267	0.864341	0.00105	0.117175
FBtr0074879	FBgn0036909	-	1642	19.2219	24.1405	-0.328702	0.3164	0.999568
FBtr0070374	FBgn0029589	-	720	0.0109411	0	inf	1	1
FBtr0070375	FBgn0025624	-	1240	19.2375	18.0107	0.0950656	0.83035	0.999568
FBtr0070376	FBgn0040395	-	2970	17.9848	19.71	-0.132154	1	1
FBtr0070377	FBgn0040395	-	2860	9.78395	8.68309	0.172208	0.6533	0.999568
FBtr0070370	FBgn0023515	-	3385	5.97293	7.38607	-0.306368	1	1
FBtr0070371	FBgn0028969	-	2170	18.9193	23.3264	-0.302101	0.3673	0.999568
FBtr0070372	FBgn0026090	-	720	20.6311	28.4922	-0.465749	1	1
Novel000136.1	Novel000136	-	1267	2.93407	1.71791	0.772248	0.0541	0.999568
FBtr0070378	FBgn0000382	-	4560	18.616	18.3931	0.0173816	0.9392	0.999568
FBtr0070379	FBgn0000382	-	7664	2.07516	1.26031	0.719443	0.23175	0.999568
TCONS_00912278	XLOC_186132	-	345	0	0	0	1	1
FBtr0330304	FBgn0264324	-	7513	0	0	0	1	1
FBtr0330305	FBgn0264324	-	6710	0	0	0	1	1
FBtr0330306	FBgn0265274	-	2136	18.134	17.1257	0.082537	0.81825	0.999568
FBtr0330300	FBgn0039633	-	11681	0.240396	0.116187	1.04897	1	1
FBtr0330301	FBgn0039633	-	11931	0.000147187	0.000140455	0.067544	1	1
FBtr0330302	FBgn0053203	-	3243	0.552483	0.764704	-0.46897	0.70885	0.999568
FBtr0330303	FBgn0264324	-	6722	0.765884	0.927419	-0.276094	0.7635	0.999568
FBtr0330308	FBgn0039214	-	13232	0	0.171606	#NAME?	1	1
FBtr0330309	FBgn0039214	-	13284	0.000437376	0.000561529	-0.360486	1	1
TCONS_00648749	XLOC_148628	-	220	1.32339	0	inf	1	1
FBtr0346378	FBgn0031070	-	3461	0	0	0	1	1
TCONS_00473649	XLOC_096535	-	213	0	1.09792	#NAME?	1	1
FBtr0343103	FBgn0265992	-	745	0.281203	0.192996	0.543037	1	1
FBtr0076439	FBgn0035977	-	1355	4.45884	2.63807	0.757186	0.724	0.999568
FBtr0071429	FBgn0030163	-	1179	3.30512	2.25097	0.554155	0.25685	0.999568
FBtr0071423	FBgn0030174	-	3511	0.215684	0.267092	-0.308414	1	1
FBtr0076430	FBgn0035971	-	983	0.196968	0.0656734	1.58458	1	1
FBtr0076433	FBgn0035975	-	1593	1.56167	1.14495	0.447802	0.56545	0.999568
FBtr0076432	FBgn0035975	-	1606	1.96091	2.15896	-0.138818	0.82855	0.999568
FBtr0076435	FBgn0035975	-	1698	0	0	0	1	1
FBtr0076434	FBgn0035975	-	1286	2.69683	2.3787	0.181092	0.73675	0.999568
FBtr0071424	FBgn0005391	-	1553	4645.71	3946.51	0.235322	0.43875	0.999568
FBtr0077748	FBgn0041337	-	1844	3.06642	4.81801	-0.651884	0.0403	0.999568
FBtr0077740	FBgn0031451	-	1440	0.0889485	0.230867	-1.37602	1	1
FBtr0331324	FBgn0032791	-	1357	3.16599	2.32495	0.445456	0.74145	0.999568
FBtr0077743	FBgn0031441	-	1144	0.127716	0.0363981	1.811	1	1
FBtr0077744	FBgn0026479	-	2711	51.6987	55.9181	-0.113188	1	1
FBtr0077745	FBgn0031436	-	621	44.9928	31.9182	0.495318	1	1
FBtr0077746	FBgn0031434	-	1654	17.6089	21.7716	-0.306141	0.2468	0.999568
FBtr0077747	FBgn0026778	-	1484	17.2696	20.713	-0.262298	0.26015	0.999568
FBtr0310388	FBgn0263743	-	676	0.0712785	0.0357024	0.997447	1	1
FBtr0310389	FBgn0263742	-	907	0.121108	0.149366	-0.302555	1	1
FBtr0310386	FBgn0263740	-	1922	213.075	236.68	-0.151577	1	1
FBtr0310387	FBgn0263740	-	1886	0.327489	0.252323	0.376171	1	1
FBtr0310384	FBgn0263738	-	2158	4.29425	4.26116	0.0111609	0.9798	0.999568
FBtr0310385	FBgn0263755	-	2386	24.7597	25.3836	-0.0359031	0.95035	0.999568
FBtr0310382	FBgn0263738	-	2340	0.263897	0.535873	-1.02192	0.63205	0.999568
FBtr0310383	FBgn0263738	-	2385	0.154692	0.103216	0.583735	1	1
FBtr0310380	FBgn0263738	-	2400	0.0190901	0.184654	-3.27392	1	1
FBtr0310381	FBgn0263738	-	2445	0.0651724	0.058169	0.164011	1	1
FBtr0088308	FBgn0261862	-	2901	52.1506	40.4057	0.368124	0.18145	0.999568
FBtr0331327	FBgn0032793	-	1349	0.431288	0.360587	0.258304	0.90645	0.999568
FBtr0088306	FBgn0033528	-	864	48.504	58.0471	-0.259119	0.22825	0.999568
FBtr0088307	FBgn0261862	-	2882	26.3541	26.7685	-0.0225069	0.95355	0.999568
FBtr0333671	FBgn0039897	-	2893	0.303595	0.470265	-0.631328	0.6493	0.999568
FBtr0333670	FBgn0016126	-	2604	28.2646	26.8815	0.0723822	0.8689	0.999568
FBtr0333673	FBgn0264607	-	3735	1.86522	1.63394	0.190997	0.8634	0.999568
TCONS_00044283	XLOC_022002	-	224	0.885528	0.431179	1.03825	1	1
FBtr0333674	FBgn0264607	-	3855	0.64594	0.389857	0.728456	0.74465	0.999568
TCONS_00879946	XLOC_144119	-	575	0.496694	0.649374	-0.386692	0.82135	0.999568
TCONS_00034298	XLOC_007184	-	210	0	0	0	1	1
FBtr0308206	FBgn0020621	-	4431	0	0	0	1	1
FBtr0308207	FBgn0029518	-	835	0.115014	0.0645289	0.833789	1	1
FBtr0308204	FBgn0036958	-	2953	0.979405	0.820427	0.25553	0.91485	0.999568
FBtr0308205	FBgn0050343	-	1064	3.14539	2.97052	0.0825267	0.97055	0.999568
FBtr0308202	FBgn0035533	-	3359	0	0.475427	#NAME?	0.1822	0.999568
FBtr0308200	FBgn0003380	-	4138	0.125344	0.0321096	1.96481	1	1
FBtr0308201	FBgn0035533	-	3422	1.16857	0.135281	3.11071	0.23085	0.999568
FBtr0308208	FBgn0005427	-	3589	7.85515	7.20553	0.124533	0.9743	0.999568
FBtr0308209	FBgn0005427	-	4051	0.10361	0	inf	1	1
TCONS_00170779	XLOC_013744	-	631	1.53724	1.25403	0.29377	0.91125	0.999568
FBtr0075912	FBgn0014343	-	3019	0.154375	0.300488	-0.960867	1	1
FBtr0332808	FBgn0037710	-	1589	0.631985	0.630167	0.004156	0.99055	0.999568
FBtr0330717	FBgn0250906	-	1867	2.48017	0	inf	0.1507	0.999568
TCONS_00939597	XLOC_189396	-	207	1.18259	0	inf	1	1
FBtr0085078	FBgn0039470	-	2127	13.246	7.26083	0.867349	0.1988	0.999568
FBtr0085077	FBgn0039471	-	1091	113.102	83.1073	0.444573	0.159	0.999568
FBtr0085075	FBgn0039469	-	1396	0.143245	0.118377	0.2751	1	1
FBtr0085074	FBgn0039467	-	1981	0.689781	0.418312	0.721561	0.74375	0.999568
FBtr0085073	FBgn0039467	-	2361	0.0769124	0	inf	1	1
FBtr0085072	FBgn0039467	-	2136	0.42763	0.516345	-0.271973	0.8997	0.999568
FBtr0085071	FBgn0039467	-	2167	0.000696898	0.000691106	0.0120412	1	1
FBtr0085070	FBgn0039467	-	1886	1.33385	1.41709	-0.0873372	0.9454	0.999568
FBtr0309250	FBgn0030087	-	4972	15.3643	19.0819	-0.312623	0.20295	0.999568
FBtr0073119	FBgn0026189	-	3828	6.26704	7.43344	-0.246244	0.5248	0.999568
FBtr0073118	FBgn0026189	-	4763	9.88462	9.30786	0.0867358	0.7704	0.999568
FBtr0073111	FBgn0035409	-	932	8.75639	14.6654	-0.744003	0.2539	0.999568
FBtr0073113	FBgn0266582	-	976	137.525	133.801	0.0396089	0.8354	0.999568
FBtr0073112	FBgn0035407	-	1303	10.8209	14.1196	-0.383887	1	1
FBtr0073115	FBgn0035400	-	2510	16.1689	19.1828	-0.246598	0.3405	0.999568
FBtr0073114	FBgn0035402	-	2779	50.1971	52.5548	-0.0662194	0.7805	0.999568
FBtr0073117	FBgn0035400	-	2973	0	0	0	1	1
FBtr0073116	FBgn0035400	-	3839	3.79125	2.89073	0.39124	0.4492	0.999568
FBtr0333024	FBgn0036393	-	565	0.0462486	0.0952441	-1.04222	1	1
FBtr0333025	FBgn0036397	-	2226	0.0445368	0.00605399	2.87904	1	1
FBtr0333026	FBgn0036391	-	3713	0.629991	0.431798	0.544975	0.37595	0.999568
FBtr0333027	FBgn0036391	-	3909	0.184906	0.2104	-0.186346	1	1
FBtr0333020	FBgn0029167	-	11753	1.31534	1.64643	-0.323906	0.50695	0.999568
FBtr0333021	FBgn0264006	-	9829	0	1.80038e-05	#NAME?	1	1
FBtr0333022	FBgn0036421	-	783	4.01355e-05	2.30679e-05	0.798994	1	1
FBtr0333023	FBgn0010105	-	2495	0.424796	0.265616	0.677429	0.56395	0.999568
FBtr0333028	FBgn0036391	-	4421	0.80561	0.293221	1.45809	0.027	0.974619
FBtr0333029	FBgn0036391	-	3762	0.159329	0.197149	-0.307282	1	1
FBtr0329886	FBgn0263970	-	953	0.0682375	0.0922584	-0.435114	1	1
Novel000198.1	Novel000198	-	2816	0.358638	0.297382	0.270209	1	1
FBtr0339079	FBgn0265194	-	7419	4.18517	4.47088	-0.0952704	0.76775	0.999568
TCONS_00046460	XLOC_025345	-	216	0	0.511974	#NAME?	1	1
FBtr0074468	FBgn0030873	-	1664	24.845	29.2471	-0.235341	0.49735	0.999568
FBtr0074469	FBgn0030873	-	1884	19.9175	21.844	-0.133206	0.7193	0.999568
FBtr0332779	FBgn0264468	-	546	0.146338	0.0487178	1.58678	1	1
FBtr0332778	FBgn0264468	-	421	0	0	0	1	1
FBtr0339078	FBgn0265194	-	7253	0.191727	0.0807104	1.24822	1	1
FBtr0074461	FBgn0026058	-	1289	0.142122	0.112351	0.33912	1	1
FBtr0074462	FBgn0030870	-	1860	12.7187	13.8473	-0.122651	1	1
FBtr0074463	FBgn0000617	-	1124	14.3553	16.3349	-0.186366	0.6616	0.999568
FBtr0074464	FBgn0030872	-	1803	15.7153	14.9634	0.0707328	0.8692	0.999568
FBtr0074465	FBgn0030874	-	1309	21.599	25.2762	-0.226813	0.3398	0.999568
FBtr0074466	FBgn0052557	-	2131	4.7965	2.41806	0.988131	0.0019	0.178781
FBtr0074467	FBgn0052554	-	817	2.80147	3.28904	-0.231482	0.80005	0.999568
FBtr0304649	FBgn0262366	-	1529	8.15002	9.83635	-0.27132	1	1
FBtr0304642	FBgn0262361	-	377	0	0	0	1	1
FBtr0304643	FBgn0262362	-	1067	0.138904	0.0197958	2.81082	1	1
FBtr0304640	FBgn0262359	-	468	0	0	0	1	1
FBtr0304641	FBgn0262360	-	455	0.130908	0.0654087	1.001	1	1
FBtr0304646	FBgn0262364	-	584	3.12734	1.67047	0.904678	0.0695	0.999568
FBtr0304647	FBgn0262365	-	488	0.174743	0.0581805	1.58662	1	1
FBtr0304644	FBgn0262362	-	479	0.0601336	0	inf	1	1
FBtr0304645	FBgn0262363	-	329	0	0	0	1	1
TCONS_00218638	XLOC_066627	-	282	0.363382	0.758196	-1.06108	1	1
FBtr0082865	FBgn0016672	-	1402	43.7613	48.7215	-0.154904	0.44695	0.999568
FBtr0082864	FBgn0047199	-	827	46.5044	50.36	-0.114913	0.6926	0.999568
FBtr0082866	FBgn0015270	-	1995	26.5989	30.7003	-0.206886	0.8073	0.999568
FBtr0082861	FBgn0038160	-	494	8.70432	6.40914	0.4416	1	1
FBtr0082860	FBgn0003060	-	568	0.209679	0.125433	0.741271	1	1
FBtr0082863	FBgn0000576	-	2478	0.219514	0.0779832	1.49308	1	1
FBtr0082862	FBgn0038160	-	1122	0.107413	0	inf	1	1
Novel000214.1	Novel000214	-	1255	0.801638	0.579741	0.467542	0.64565	0.999568
FBtr0082869	FBgn0038195	-	1981	61.9998	62.5469	-0.0126742	0.9571	0.999568
FBtr0303148	FBgn0004369	-	7109	0.666641	0.365615	0.866583	0.35465	0.999568
FBtr0303149	FBgn0041242	-	1206	0.324486	0.331361	-0.0302451	1	1
FBtr0331445	FBgn0002673	-	2240	1.06756	1.3516	-0.340345	0.85975	0.999568
TCONS_00504191	XLOC_113388	-	209	1.24244	0	inf	1	1
TCONS_00963876	XLOC_191865	-	230	1.1817	0	inf	1	1
FBtr0305599	FBgn0052644	-	2012	1.28616	1.54445	-0.264023	0.50635	0.999568
FBtr0305598	FBgn0052642	-	1318	9.58214	11.2567	-0.232366	1	1
FBtr0305591	FBgn0030425	-	2126	11.2483	10.3607	0.118596	1	1
FBtr0305593	FBgn0011826	-	4551	0.524078	0.257741	1.02386	1	1
FBtr0305592	FBgn0262739	-	7888	9.76325	7.04253	0.471269	0.25725	0.999568
FBtr0305595	FBgn0035097	-	1326	0.480137	0.398019	0.27061	0.7114	0.999568
FBtr0305596	FBgn0262679	-	879	1.38556	1.70841	-0.302185	0.5168	0.999568
FBtr0087565	FBgn0261270	-	1521	115.594	138.813	-0.264083	0.1713	0.999568
FBtr0087564	FBgn0261270	-	1887	4.89063	5.58297	-0.191012	0.83315	0.999568
FBtr0087562	FBgn0033921	-	1942	40.8141	50.9026	-0.318671	0.10965	0.999568
FBtr0087561	FBgn0033925	-	1328	24.3871	27.9836	-0.19846	0.37855	0.999568
FBtr0087560	FBgn0033926	-	2371	466.236	435.234	0.0992681	0.6237	0.999568
FBtr0087569	FBgn0033915	-	3198	45.2899	49.5439	-0.129518	0.49995	0.999568
FBtr0087568	FBgn0001220	-	2922	0.404468	0.816641	-1.01367	0.7796	0.999568
FBtr0344288	FBgn0037960	-	1952	1.45696	1.42328	0.0337384	0.9794	0.999568
FBtr0344289	FBgn0037577	-	592	0.993188	0.154703	2.68257	0.38665	0.999568
FBtr0344284	FBgn0261552	-	2889	0.22705	0.297374	-0.389266	1	1
FBtr0344285	FBgn0038756	-	401	6.40137	5.59836	0.193376	0.91165	0.999568
FBtr0344282	FBgn0067783	-	2089	0.986613	0.549605	0.844089	0.58885	0.999568
FBtr0344283	FBgn0261552	-	10080	0.602114	0.334149	0.849546	0.4595	0.999568
FBtr0344280	FBgn0067783	-	1901	3.71651	2.19231	0.7615	0.3607	0.999568
FBtr0344281	FBgn0067783	-	1440	2.54164	3.08853	-0.281157	0.77265	0.999568
Novel000224.1	Novel000224	-	780	0.0885758	0.435269	-2.29692	0.5909	0.999568
TCONS_00645002	XLOC_142916	-	209	1.80552	0.649534	1.47494	1	1
FBtr0085848	FBgn0039881	-	1106	4.12305	3.65737	0.172909	0.7914	0.999568
FBtr0085849	FBgn0266268	-	1407	57.8647	61.7166	-0.0929763	0.64215	0.999568
FBtr0085846	FBgn0039879	-	1812	0.225009	0.219434	0.0361958	1	1
FBtr0085847	FBgn0039881	-	1145	3.0857	3.84869	-0.318768	0.5721	0.999568
FBtr0085844	FBgn0005632	-	8682	8.96498	10.4244	-0.217598	0.7144	0.999568
FBtr0085845	FBgn0027620	-	5079	53.2866	59.7453	-0.165052	0.39	0.999568
FBtr0085842	FBgn0039875	-	2280	7.05116	8.66029	-0.296554	1	1
FBtr0085843	FBgn0005632	-	9194	30.0937	36.2085	-0.266866	0.34665	0.999568
FBtr0085840	FBgn0022349	-	2698	0.200772	0.27507	-0.454241	1	1
FBtr0085841	FBgn0022349	-	2628	0.189324	0.0532536	1.8299	1	1
FBtr0089172	FBgn0011747	-	5291	19.9476	16.2943	0.291845	0.5663	0.999568
FBtr0089173	FBgn0011747	-	5101	6.26659	2.60308	1.26746	0.28015	0.999568
FBtr0089170	FBgn0052006	-	1684	0.313976	0.143327	1.13135	1	1
FBtr0089171	FBgn0011747	-	5176	93.622	107.383	-0.19785	0.36245	0.999568
FBtr0089176	FBgn0017545	-	854	23.5335	26.65	-0.179422	0.96535	0.999568
FBtr0089175	FBgn0017545	-	910	4142.23	4475.7	-0.111706	1	1
FBtr0089178	FBgn0004859	-	4941	5.57287	4.54656	0.293644	0.2329	0.999568
FBtr0089179	FBgn0025740	-	6716	17.9957	20.2053	-0.167076	1	1
FBtr0079966	FBgn0032184	-	576	0.180072	0.274959	-0.610642	1	1
FBtr0079964	FBgn0051874	-	1623	0.351969	0.399816	-0.183886	0.8773	0.999568
FBtr0079962	FBgn0032189	-	1259	68.8182	83.0784	-0.271683	0.16415	0.999568
TCONS_00455282	XLOC_108436	-	200	0	0	0	1	1
FBtr0079960	FBgn0032191	-	2205	55.4641	60.0657	-0.114989	0.551	0.999568
FBtr0079969	FBgn0032181	-	1182	0.787483	0.532892	0.563406	0.7391	0.999568
FBtr0073843	FBgn0030514	-	3113	37.7482	43.9324	-0.21888	0.25045	0.999568
FBtr0073842	FBgn0001087	-	3853	23.8262	26.6468	-0.161412	0.4421	0.999568
FBtr0073841	FBgn0001612	-	3571	32.9273	36.3749	-0.143657	0.75615	0.999568
FBtr0073840	FBgn0030520	-	2368	88.6556	107.589	-0.279243	0.40675	0.999568
FBtr0073847	FBgn0030506	-	3040	15.0333	16.6592	-0.148163	0.47545	0.999568
TCONS_00729585	XLOC_174896	-	245	0	0	0	1	1
TCONS_00967571	XLOC_198169	-	204	0.638054	0	inf	1	1
FBtr0073845	FBgn0030512	-	4321	27.6981	29.7038	-0.100864	0.6468	0.999568
TCONS_00956585	XLOC_218163	-	205	0	0	0	1	1
FBtr0073844	FBgn0030512	-	4375	4.56893	3.51198	0.37957	0.53285	0.999568
FBtr0084718	FBgn0039251	-	1870	25.366	25.4947	-0.00730371	0.9837	0.999568
FBtr0084715	FBgn0039249	-	2980	1.29059	1.19074	0.116166	0.86795	0.999568
FBtr0084716	FBgn0039250	-	2511	18.3626	21.274	-0.212322	0.525	0.999568
FBtr0084711	FBgn0043799	-	1699	3.61447	3.69161	-0.0304654	0.98705	0.999568
FBtr0084710	FBgn0039241	-	2272	75.7118	83.478	-0.140878	0.63345	0.999568
FBtr0084713	FBgn0039246	-	1933	0.268677	0.143868	0.901121	1	1
FBtr0084712	FBgn0039244	-	2038	3.00204	2.681	0.163172	0.6128	0.999568
FBtr0340455	FBgn0263395	-	5041	0.492396	0.249063	0.983308	0.5431	0.999568
FBtr0340454	FBgn0263395	-	4330	0	0	0	1	1
FBtr0345627	FBgn0028737	-	960	17.5892	19.7506	-0.167209	0.90395	0.999568
FBtr0082006	FBgn0040534	-	370	131.389	166.556	-0.342163	0.14085	0.999568
FBtr0082005	FBgn0264075	-	3108	4.07825	4.49984	-0.141924	0.7643	0.999568
FBtr0082004	FBgn0002932	-	3989	4.31795	4.2276	0.0305078	0.95215	0.999568
FBtr0082003	FBgn0002932	-	3992	0.000610069	0.000252918	1.2703	1	1
FBtr0082002	FBgn0002932	-	3753	1.94572	1.58948	0.291748	0.74475	0.999568
FBtr0082001	FBgn0002932	-	3756	0	0	0	1	1
FBtr0345620	FBgn0034974	-	2931	0.175068	0.0267266	2.71157	1	1
FBtr0340459	FBgn0034417	-	2707	1.53683	1.37962	0.155694	0.7895	0.999568
FBtr0345629	FBgn0033476	-	3556	0.0585539	0	inf	1	1
FBtr0345628	FBgn0034354	-	943	5.04521	5.37545	-0.0914698	0.91105	0.999568
FBtr0342938	FBgn0265956	-	764	0.0857865	0.0483556	0.827068	1	1
FBtr0340458	FBgn0034417	-	2380	0.482049	0.1297	1.894	0.45065	0.999568
FBtr0333842	FBgn0036279	-	4762	0.878359	0.437582	1.00526	0.412	0.999568
FBtr0342932	FBgn0265957	-	900	0	0	0	1	1
FBtr0342933	FBgn0265957	-	1051	0.66611	0.472808	0.494504	0.87305	0.999568
FBtr0342930	FBgn0265952	-	931	0.234621	0.0716015	1.71227	1	1
FBtr0342931	FBgn0031692	-	688	0	0	0	1	1
FBtr0342936	FBgn0016076	-	3890	0.490104	0.420689	0.220331	0.8879	0.999568
FBtr0342937	FBgn0265956	-	1161	0.181419	0.154241	0.234134	1	1
FBtr0342934	FBgn0031696	-	4091	10.6921	7.75901	0.462608	0.0952	0.999568
FBtr0342935	FBgn0265955	-	514	0	0	0	1	1
FBtr0301458	FBgn0032940	-	3928	0	1.9405	0	1	1
FBtr0301459	FBgn0032940	-	4837	0	0.422232	0	1	1
FBtr0301454	FBgn0026401	-	6604	11.4885	10.7772	0.0922136	0.87645	0.999568
FBtr0301455	FBgn0026401	-	6639	13.6154	16.0473	-0.237086	0.63785	0.999568
FBtr0301456	FBgn0026401	-	6611	12.2071	15.9407	-0.384998	0.451	0.999568
FBtr0301457	FBgn0032940	-	4834	0	10.6642	-0.117702	1	1
FBtr0301450	FBgn0030505	-	5243	9.09478	10.4611	-0.201924	0.46165	0.999568
FBtr0301451	FBgn0030505	-	6009	0.541037	0.41582	0.379767	0.7622	0.999568
FBtr0301452	FBgn0026787	-	2551	28.2271	30.5679	-0.114935	0.70065	0.999568
FBtr0306102	FBgn0260439	-	2588	0.217177	0.232946	-0.101122	1	1
FBtr0306101	FBgn0051374	-	3272	1.72543	1.88777	-0.129724	0.84705	0.999568
FBtr0306100	FBgn0051374	-	2146	0.000977393	0	inf	1	1
FBtr0306107	FBgn0004449	-	12169	1.54159	1.14931	0.423661	0.4136	0.999568
FBtr0306106	FBgn0004436	-	1142	69.7032	75.1366	-0.108292	1	1
FBtr0306105	FBgn0265266	-	467	0.376204	0.19157	0.973645	1	1
FBtr0306104	FBgn0039690	-	897	1.45057	1.37071	0.0816939	0.94575	0.999568
FBtr0346983	FBgn0267571	-	3391	0.177921	0.189057	-0.0875836	1	1
TCONS_00797550	XLOC_163585	-	223	0.903794	0.880143	0.0382557	1	1
FBtr0333840	FBgn0036279	-	4044	0.290612	0.0573948	2.3401	1	1
FBtr0331650	FBgn0085201	-	303	1.02221	0.25971	1.97671	0.60295	0.999568
FBtr0346982	FBgn0267571	-	3055	0.152924	0.0203412	2.91034	1	1
FBtr0302374	FBgn0028371	-	5339	1.19279	0.0605232	4.30071	0.1777	0.999568
FBtr0302375	FBgn0260748	-	4563	1.3132	1.45867	-0.151563	0.8977	0.999568
FBtr0302376	FBgn0260748	-	4573	0.288205	0.0678876	2.08588	1	1
FBtr0302377	FBgn0260748	-	1967	5.22947	3.02935	0.787655	0.4043	0.999568
FBtr0302370	FBgn0015019	-	2086	12.1666	10.9196	0.156001	0.8454	0.999568
FBtr0302371	FBgn0015019	-	2071	3.85576	3.21812	0.260797	0.8568	0.999568
FBtr0302372	FBgn0054049	-	967	0.0670079	0	inf	1	1
FBtr0302378	FBgn0000229	-	1797	0.128035	0.893704	-2.80326	0.2857	0.999568
FBtr0302379	FBgn0038083	-	1667	5.10274	3.46797	0.557179	0.08595	0.999568
FBtr0332101	FBgn0000541	-	8652	2.40298	1.09029	1.1401	0.37265	0.999568
FBtr0332005	FBgn0264344	-	505	0.661296	0.336911	0.972928	0.74315	0.999568
FBtr0332102	FBgn0000541	-	9296	0.899407	0.712742	0.335594	0.84825	0.999568
FBtr0332004	FBgn0264344	-	590	0	0	0	1	1
FBtr0070178	FBgn0003638	-	4836	0.636371	0.504355	0.335429	0.8839	0.999568
FBtr0070179	FBgn0040398	-	1107	159.131	124.952	0.348843	0.1684	0.999568
FBtr0332007	FBgn0264341	-	789	0.435595	0.17881	1.28456	1	1
FBtr0070172	FBgn0029552	-	590	0.217297	0.0433669	2.325	1	1
FBtr0070173	FBgn0040337	-	1412	19.7288	21.6996	-0.137368	0.83535	0.999568
FBtr0070170	FBgn0040347	-	2155	36.5766	44.8009	-0.292609	0.15305	0.999568
FBtr0070171	FBgn0042146	-	667	0.436202	0.188206	1.21268	1	1
FBtr0070176	FBgn0003638	-	3199	12.7671	14.1005	-0.143316	0.78785	0.999568
FBtr0070177	FBgn0003638	-	4056	0.434664	0.820291	-0.916235	0.7189	0.999568
FBtr0070174	FBgn0053082	-	796	2.5997	2.38444	0.124697	1	1
FBtr0070175	FBgn0014903	-	1358	41.3594	49.8115	-0.268262	0.5692	0.999568
FBtr0303601	FBgn0261928	-	9928	0.0246133	0	inf	1	1
FBtr0078369	FBgn0028663	-	699	227.565	228.538	-0.00615354	1	1
FBtr0078368	FBgn0015283	-	1422	1.85932	2.97839	-0.679761	0.7083	0.999568
FBtr0078366	FBgn0037094	-	3810	5.80762	6.11809	-0.0751345	0.9155	0.999568
FBtr0078365	FBgn0037094	-	3143	1.05942	2.37569	-1.16507	0.457	0.999568
FBtr0078364	FBgn0037094	-	3070	0	0.606809	#NAME?	0.08865	0.999568
FBtr0078363	FBgn0037094	-	3041	11.5426	10.4699	0.140729	0.79385	0.999568
FBtr0078362	FBgn0037094	-	3348	16.5255	16.5672	-0.0036387	0.99345	0.999568
FBtr0078361	FBgn0037094	-	3370	10.499	10.9391	-0.0592497	0.91305	0.999568
FBtr0343197	FBgn0034841	-	1528	0.0909164	0.118956	-0.387819	1	1
FBtr0343195	FBgn0034833	-	1099	0	0	0	1	1
FBtr0343194	FBgn0266009	-	677	0.142699	0.142517	0.00184727	1	1
FBtr0345585	FBgn0005626	-	3806	0.204653	0.128897	0.666959	1	1
FBtr0343193	FBgn0266008	-	977	0.1101	0.0233002	2.2404	1	1
FBtr0343192	FBgn0021979	-	1259	3.19494	2.02032	0.661201	0.65385	0.999568
FBtr0343191	FBgn0021979	-	1259	6.48831	3.81515	0.766103	0.4165	0.999568
FBtr0072423	FBgn0035073	-	3322	18.375	18.7671	-0.0304594	0.88495	0.999568
FBtr0333845	FBgn0036876	-	1592	5.37261	2.1793	1.30176	0.01885	0.800727
FBtr0079181	FBgn0031763	-	832	0.189646	0.0285737	2.73056	1	1
FBtr0079182	FBgn0051643	-	2938	5.63861	7.29087	-0.37075	0.6376	0.999568
FBtr0079183	FBgn0031768	-	1700	7.15693	9.15345	-0.354974	0.6203	0.999568
FBtr0079184	FBgn0031768	-	1612	8.13324	9.29154	-0.192087	0.78245	0.999568
FBtr0079185	FBgn0031769	-	1832	0	0.0211373	#NAME?	1	1
FBtr0079186	FBgn0031769	-	1978	3.72638	4.8567	-0.382202	0.73095	0.999568
FBtr0079187	FBgn0031770	-	3379	0.692193	0.478485	0.532702	0.2005	0.999568
FBtr0079188	FBgn0031772	-	631	1.64819	1.70069	-0.0452385	0.9746	0.999568
FBtr0079189	FBgn0031774	-	1377	0.818715	0	inf	0.12125	0.999568
FBtr0303421	FBgn0004910	-	880	1.16647	0.873354	0.417515	0.7867	0.999568
FBtr0303420	FBgn0004910	-	2552	2.76808	1.45889	0.924012	0.10115	0.999568
FBtr0303427	FBgn0051044	-	4439	0	0	0	1	1
FBtr0303426	FBgn0051044	-	1768	0	0	0	1	1
FBtr0303425	FBgn0053483	-	728	1.14438e-06	0.0341109	-14.8634	1	1
FBtr0347418	FBgn0023083	-	3373	0.110057	0	inf	1	1
FBtr0347412	FBgn0039487	-	2449	0.000307536	0.801246	-11.3473	1	1
FBtr0347413	FBgn0267592	-	4002	0	0	0	1	1
FBtr0347410	FBgn0032820	-	1202	29.4222	37.6427	-0.355463	0.3518	0.999568
FBtr0347411	FBgn0085339	-	701	0	0.105539	#NAME?	1	1
FBtr0347416	FBgn0000808	-	2234	0.707094	0.499893	0.500283	0.5839	0.999568
FBtr0347417	FBgn0023083	-	3464	2.80996	1.24973	1.16894	0.1738	0.999568
FBtr0347414	FBgn0264953	-	10101	0.430114	0.179586	1.26004	0.442	0.999568
FBtr0347415	FBgn0264953	-	10506	0.0157383	0.0461938	-1.55342	1	1
TCONS_00525828	XLOC_120586	-	203	0	0.761167	#NAME?	1	1
FBtr0078588	FBgn0037406	-	1161	0.0538419	0.0923978	-0.779128	1	1
FBtr0078582	FBgn0027339	-	13458	0	0	0	1	1
FBtr0078587	FBgn0037405	-	2302	21.833	22.4292	-0.0388687	0.85255	0.999568
FBtr0308921	FBgn0051386	-	2763	0.0608136	0.069344	-0.189378	1	1
FBtr0078585	FBgn0037402	-	694	0	0	0	1	1
FBtr0078584	FBgn0046878	-	899	2.57073	2.37712	0.112963	0.8611	0.999568
FBtr0330149	FBgn0263108	-	3336	1.68114	2.00692	-0.255545	0.81705	0.999568
FBtr0076639	FBgn0052351	-	2093	0.209937	0.158648	0.404132	1	1
FBtr0076638	FBgn0035915	-	2121	0.242515	0.166326	0.544056	1	1
FBtr0076637	FBgn0035914	-	3611	0.223208	0.163164	0.452065	1	1
FBtr0076633	FBgn0017579	-	619	2532.57	2587.89	-0.0311771	0.8785	0.999568
FBtr0330147	FBgn0262139	-	4570	0	1.01937e-05	#NAME?	1	1
FBtr0330144	FBgn0261929	-	4014	0.0875927	0.00106418	6.363	1	1
[truncated: 32,297 more rows]

## Sheet: 7 day vs 42 day in fully fed
transcript_id	gene_id	gene_name	length	7_day_fully fed_FPKM	42_day_fully fed_FPKM	log2(foldchange)	pvalue	qvalue
[truncated: 34,268 more rows]
