# Supplementary material for: LncRNA mediated regulation of aging pathways in Drosophila melanogaster during dietary restriction
Source: Aging (Albany NY). 2016 Sep 27;8(9):2182–97. doi: 10.18632/aging.101062 (PMC5076457; doi:10.18632/aging.101062)
Supplement: Supplementary file 7 [file aging-08-2182-s007.xls]

## Sheet: Cis 7 day vs 42 day in DR
GO_accession	Description	Term_type	Over_represented_pValue	Corrected_pValue	CAD_item	CAD_list	Bg_item	Bg_list	Gene_names	Gene_description
GO:0044429	mitochondrial part	cellular_component	0.0016019	1	16	366	197	10392	FBgn0036920,FBgn0034489,FBgn0031194,FBgn0031941,FBgn0030610,FBgn0028387,FBgn0034259,FBgn0031190,Novel000234,FBgn0050109,FBgn0033074,FBgn0033065,FBgn0259683,FBgn0034274,FBgn0033834,FBgn0036928	-|-|-|-|-|-|-|-|-|-|-|-|-|-|-|-|
GO:0005739	mitochondrion	cellular_component	0.0036076	1	17	366	233	10392	FBgn0050109,Novel000234,FBgn0033065,FBgn0259683,FBgn0033074,FBgn0030605,FBgn0033834,FBgn0034274,FBgn0036928,FBgn0036920,FBgn0031941,FBgn0031194,FBgn0034489,FBgn0030610,FBgn0031190,FBgn0034259,FBgn0028387	-|-|-|-|-|-|-|-|-|-|-|-|-|-|-|-|-|
GO:0005992	trehalose biosynthetic process	biological_process	0.0036258	1	2	366	3	10392	FBgn0031907,FBgn0031908	-|-|
GO:0005741	mitochondrial outer membrane	cellular_component	0.005555	1	5	366	33	10392	FBgn0036920,FBgn0033834,FBgn0031194,FBgn0036928,FBgn0033074	-|-|-|-|-|
GO:0031968	organelle outer membrane	cellular_component	0.005555	1	5	366	33	10392	FBgn0036928,FBgn0031194,FBgn0033074,FBgn0036920,FBgn0033834	-|-|-|-|-|
GO:0044444	cytoplasmic part	cellular_component	0.0063169	1	48	366	948	10392	FBgn0033074,FBgn0031905,FBgn0014877,FBgn0033065,FBgn0034277,FBgn0034258,FBgn0034271,Novel000234,FBgn0001983,FBgn0029123,FBgn0266429,FBgn0036924,FBgn0031194,FBgn0034489,FBgn0031941,FBgn0010411,FBgn0267727,FBgn0036932,FBgn0031904,FBgn0034259,FBgn0031190,FBgn0032987,FBgn0016976,FBgn0030610,FBgn0004228,FBgn0015288,FBgn0085427,FBgn0030616,FBgn0259683,FBgn0000546,FBgn0030605,FBgn0050109,FBgn0034261,FBg…	-|-|-|-|-|-|-|-|-|-|-|-|-|-|-|-|-|-|-|-|-|-|-|-|-|-|-|-|-|-|-|-|-|-|-|-|-|-|-|-|-|-|-|-|-|-|-|-|
GO:0005737	cytoplasm	cellular_component	0.006983	1	63	366	1322	10392	FBgn0033074,FBgn0031905,FBgn0014877,FBgn0034277,FBgn0034258,FBgn0033065,FBgn0031196,FBgn0034276,FBgn0263144,FBgn0043456,Novel000234,FBgn0034271,FBgn0261802,FBgn0032077,FBgn0025616,FBgn0001983,FBgn0029123,FBgn0036924,FBgn0266429,FBgn0031194,FBgn0034489,FBgn0031941,FBgn0036921,FBgn0033072,FBgn0036932,FBgn0039966,FBgn0031904,FBgn0010411,FBgn0267727,FBgn0032987,FBgn0036497,FBgn0034259,FBgn0031190,FBg…	-|-|-|-|-|-|-|-|-|-|-|-|-|-|-|-|-|-|-|-|-|-|-|-|-|-|-|-|-|-|-|-|-|-|-|-|-|-|-|-|-|-|-|-|-|-|-|-|-|-|-|-|-|-|-|-|-|-|-|-|-|-|-|
GO:0008201	heparin binding	molecular_function	0.007079	1	2	366	4	10392	FBgn0029657,FBgn0034261	-|-|
GO:0046351	disaccharide biosynthetic process	biological_process	0.0070824	1	2	366	4	10392	FBgn0031907,FBgn0031908	-|-|
GO:0003951	NAD+ kinase activity	molecular_function	0.0070827	1	2	366	4	10392	FBgn0053156,FBgn0033853	-|-|
GO:0006741	NADP biosynthetic process	biological_process	0.0070827	1	2	366	4	10392	FBgn0053156,FBgn0033853	-|-|
GO:0005759	mitochondrial matrix	cellular_component	0.0095279	1	3	366	13	10392	FBgn0034489,FBgn0034259,FBgn0033065	-|-|-|
GO:0005622	intracellular	cellular_component	0.011393	1	128	366	3060	10392	FBgn0015799,FBgn0266429,FBgn0053156,FBgn0033074,FBgn0014877,Novel000234,FBgn0263144,FBgn0032987,FBgn0016976,FBgn0030610,FBgn0263774,FBgn0034489,FBgn0010411,FBgn0036932,FBgn0040477,FBgn0039966,FBgn0031904,FBgn0032083,FBgn0022740,FBgn0053872,FBgn0005655,FBgn0036498,FBgn0034274,FBgn0036496,FBgn0259683,FBgn0053861,FBgn0084001,FBgn0030617,FBgn0024556,FBgn0085450,FBgn0001138,FBgn0010812,FBgn0037539,FBg…	-|-|-|-|-|-|-|-|-|-|-|-|-|-|-|-|-|-|-|-|-|-|-|-|-|-|-|-|-|-|-|-|-|-|-|-|-|-|-|-|-|-|-|-|-|-|-|-|-|-|-|-|-|-|-|-|-|-|-|-|-|-|-|-|-|-|-|-|-|-|-|-|-|-|-|-|-|-|-|-|-|-|-|-|-|-|-|-|-|-|-|-|-|-|-|-|-|-|-|-|-|-|-|-|-|-|-|-|-|-|-|-|-|-|-|-|-|-|-|-|-|-|-|-|-|-|-|-
GO:0016671	oxidoreductase activity, acting on a sulfur group of donors, disulfide as acceptor	molecular_function	0.01153	1	2	366	5	10392	FBgn0000565,FBgn0030616	-|-|
GO:0019359	nicotinamide nucleotide biosynthetic process	biological_process	0.011531	1	2	366	5	10392	FBgn0033853,FBgn0053156	-|-|
GO:0019363	pyridine nucleotide biosynthetic process	biological_process	0.011531	1	2	366	5	10392	FBgn0033853,FBgn0053156	-|-|
GO:0009888	tissue development	biological_process	0.011815	1	3	366	14	10392	Novel000234,FBgn0039945,FBgn0039944	-|-|-|
GO:0005740	mitochondrial envelope	cellular_component	0.013204	1	13	366	184	10392	FBgn0031190,FBgn0028387,FBgn0036928,FBgn0033834,FBgn0034274,FBgn0030610,FBgn0259683,FBgn0033074,FBgn0031941,FBgn0031194,Novel000234,FBgn0050109,FBgn0036920	-|-|-|-|-|-|-|-|-|-|-|-|-|
GO:0016055	Wnt receptor signaling pathway	biological_process	0.01399	1	4	366	27	10392	FBgn0031902,FBgn0034276,FBgn0004009,FBgn0031903	-|-|-|-|
GO:0005539	glycosaminoglycan binding	molecular_function	0.016889	1	2	366	6	10392	FBgn0029657,FBgn0034261	-|-|
GO:0015459	potassium channel regulator activity	molecular_function	0.016894	1	2	366	6	10392	FBgn0030613,FBgn0040294	-|-|
GO:0019870	potassium channel inhibitor activity	molecular_function	0.016894	1	2	366	6	10392	FBgn0030613,FBgn0040294	-|-|
GO:0003989	acetyl-CoA carboxylase activity	molecular_function	0.016895	1	2	366	6	10392	FBgn0028377,FBgn0001099	-|-|
GO:0016421	CoA carboxylase activity	molecular_function	0.016895	1	2	366	6	10392	FBgn0028377,FBgn0001099	-|-|
GO:0016885	ligase activity, forming carbon-carbon bonds	molecular_function	0.016895	1	2	366	6	10392	FBgn0028377,FBgn0001099	-|-|
GO:0072525	pyridine-containing compound biosynthetic process	biological_process	0.016896	1	2	366	6	10392	FBgn0053156,FBgn0033853	-|-|
GO:0005217	intracellular ligand-gated ion channel activity	molecular_function	0.017255	1	3	366	16	10392	FBgn0027581,FBgn0266489,FBgn0001138	-|-|-|
GO:0005218	intracellular ligand-gated calcium channel activity	molecular_function	0.017255	1	3	366	16	10392	FBgn0027581,FBgn0001138,FBgn0266489	-|-|-|
GO:0005219	ryanodine-sensitive calcium-release channel activity	molecular_function	0.017255	1	3	366	16	10392	FBgn0027581,FBgn0266489,FBgn0001138	-|-|-|
GO:0006874	cellular calcium ion homeostasis	biological_process	0.017255	1	3	366	16	10392	FBgn0266489,FBgn0001138,FBgn0027581	-|-|-|
GO:0015278	calcium-release channel activity	molecular_function	0.017255	1	3	366	16	10392	FBgn0266489,FBgn0001138,FBgn0027581	-|-|-|
GO:0055074	calcium ion homeostasis	biological_process	0.017255	1	3	366	16	10392	FBgn0027581,FBgn0266489,FBgn0001138	-|-|-|
GO:0072503	cellular divalent inorganic cation homeostasis	biological_process	0.017255	1	3	366	16	10392	FBgn0027581,FBgn0001138,FBgn0266489	-|-|-|
GO:0072507	divalent inorganic cation homeostasis	biological_process	0.017255	1	3	366	16	10392	FBgn0001138,FBgn0266489,FBgn0027581	-|-|-|
GO:0008544	epidermis development	biological_process	0.023106	1	2	366	7	10392	FBgn0039944,FBgn0039945	-|-|
GO:0043588	skin development	biological_process	0.023106	1	2	366	7	10392	FBgn0039945,FBgn0039944	-|-|
GO:0005991	trehalose metabolic process	biological_process	0.023107	1	2	366	7	10392	FBgn0031907,FBgn0031908	-|-|
GO:0003870	5-aminolevulinate synthase activity	molecular_function	0.023107	1	2	366	7	10392	FBgn0034489,FBgn0033065	-|-|
GO:0016749	N-succinyltransferase activity	molecular_function	0.023107	1	2	366	7	10392	FBgn0033065,FBgn0034489	-|-|
GO:0005742	mitochondrial outer membrane translocase complex	cellular_component	0.023108	1	2	366	7	10392	FBgn0036928,FBgn0031194	-|-|
GO:0016054	organic acid catabolic process	biological_process	0.025005	1	4	366	32	10392	FBgn0005655,FBgn0027572,FBgn0030612,FBgn0034276	-|-|-|-|
GO:0046395	carboxylic acid catabolic process	biological_process	0.025005	1	4	366	32	10392	FBgn0005655,FBgn0027572,FBgn0030612,FBgn0034276	-|-|-|-|
GO:1901606	alpha-amino acid catabolic process	biological_process	0.027629	1	3	366	19	10392	FBgn0005655,FBgn0030612,FBgn0034276	-|-|-|
GO:0044425	membrane part	cellular_component	0.029204	1	85	366	1995	10392	FBgn0036922,FBgn0036924,FBgn0001983,FBgn0029123,FBgn0034247,FBgn0029663,FBgn0039941,FBgn0031905,FBgn0034277,FBgn0031196,FBgn0000535,FBgn0032988,FBgn0031914,FBgn0004228,FBgn0030608,FBgn0016701,Novel000089,FBgn0264389,FBgn0036934,FBgn0031194,FBgn0031941,FBgn0265835,FBgn0034267,FBgn0036928,FBgn0040031,FBgn0034275,FBgn0050109,FBgn0034490,FBgn0040805,FBgn0041247,FBgn0052843,FBgn0034479,FBgn0085427,FBg…	-|-|-|-|-|-|-|-|-|-|-|-|-|-|-|-|-|-|-|-|-|-|-|-|-|-|-|-|-|-|-|-|-|-|-|-|-|-|-|-|-|-|-|-|-|-|-|-|-|-|-|-|-|-|-|-|-|-|-|-|-|-|-|-|-|-|-|-|-|-|-|-|-|-|-|-|-|-|-|-|-|-|-|-|-|
GO:0090407	organophosphate biosynthetic process	biological_process	0.029237	1	15	366	248	10392	FBgn0050109,Novel000234,FBgn0051875,FBgn0031941,FBgn0033853,FBgn0266429,FBgn0033844,FBgn0031948,FBgn0034274,FBgn0032172,FBgn0004852,FBgn0053156,FBgn0034270,FBgn0028387,FBgn0023416	-|-|-|-|-|-|-|-|-|-|-|-|-|-|-|
GO:0044424	intracellular part	cellular_component	0.029245	1	116	366	2826	10392	FBgn0036496,FBgn0034274,FBgn0033834,FBgn0260964,FBgn0036498,FBgn0053872,FBgn0032083,FBgn0053869,FBgn0022740,FBgn0005655,FBgn0053861,FBgn0084001,FBgn0025674,FBgn0037551,FBgn0259683,FBgn0030617,FBgn0053871,FBgn0036918,FBgn0028387,FBgn0016975,FBgn0085450,FBgn0010812,FBgn0001138,FBgn0263994,FBgn0053156,FBgn0266429,FBgn0015799,FBgn0263144,Novel000234,FBgn0053873,FBgn0033074,FBgn0014877,FBgn0030610,FBg…	-|-|-|-|-|-|-|-|-|-|-|-|-|-|-|-|-|-|-|-|-|-|-|-|-|-|-|-|-|-|-|-|-|-|-|-|-|-|-|-|-|-|-|-|-|-|-|-|-|-|-|-|-|-|-|-|-|-|-|-|-|-|-|-|-|-|-|-|-|-|-|-|-|-|-|-|-|-|-|-|-|-|-|-|-|-|-|-|-|-|-|-|-|-|-|-|-|-|-|-|-|-|-|-|-|-|-|-|-|-|-|-|-|-|-|-|
GO:0023052	signaling	biological_process	0.029266	1	45	366	963	10392	FBgn0264895,FBgn0003448,FBgn0264449,FBgn0020880,FBgn0023416,FBgn0033845,FBgn0036929,FBgn0003016,FBgn0031188,FBgn0027343,FBgn0024556,FBgn0031903,FBgn0040805,FBgn0052843,FBgn0004364,FBgn0031906,FBgn0000546,FBgn0034249,FBgn0037546,FBgn0037551,FBgn0016701,FBgn0004852,FBgn0000535,FBgn0259148,FBgn0000180,FBgn0031914,FBgn0003475,FBgn0050106,FBgn0036497,FBgn0036494,FBgn0036932,FBgn0025836,FBgn0039966,FBg…	-|-|-|-|-|-|-|-|-|-|-|-|-|-|-|-|-|-|-|-|-|-|-|-|-|-|-|-|-|-|-|-|-|-|-|-|-|-|-|-|-|-|-|-|-|
GO:0044700	single organism signaling	biological_process	0.029266	1	45	366	963	10392	FBgn0031914,FBgn0000180,FBgn0259148,FBgn0000535,FBgn0016701,FBgn0004852,FBgn0036497,FBgn0050106,FBgn0003475,FBgn0039966,FBgn0036494,FBgn0036932,FBgn0025836,FBgn0262519,FBgn0036926,FBgn0036934,FBgn0266429,FBgn0013303,FBgn0004009,FBgn0011584,FBgn0261571,FBgn0034276,FBgn0029664,FBgn0033853,FBgn0031902,FBgn0020880,FBgn0264449,FBgn0003448,FBgn0264895,FBgn0003016,FBgn0033845,FBgn0036929,FBgn0023416,FBg…	-|-|-|-|-|-|-|-|-|-|-|-|-|-|-|-|-|-|-|-|-|-|-|-|-|-|-|-|-|-|-|-|-|-|-|-|-|-|-|-|-|-|-|-|-|
GO:0005984	disaccharide metabolic process	biological_process	0.030099	1	2	366	8	10392	FBgn0031908,FBgn0031907	-|-|
GO:0004611	phosphoenolpyruvate carboxykinase activity	molecular_function	0.030101	1	2	366	8	10392	FBgn0031957,FBgn0040099	-|-|
GO:0044282	small molecule catabolic process	biological_process	0.030535	1	4	366	34	10392	FBgn0030612,FBgn0034276,FBgn0005655,FBgn0027572	-|-|-|-|
GO:0044712	single-organism catabolic process	biological_process	0.030535	1	4	366	34	10392	FBgn0030612,FBgn0034276,FBgn0027572,FBgn0005655	-|-|-|-|
GO:0031966	mitochondrial membrane	cellular_component	0.031464	1	11	366	165	10392	Novel000234,FBgn0050109,FBgn0036920,FBgn0259683,FBgn0033074,FBgn0031941,FBgn0031194,FBgn0033834,FBgn0034274,FBgn0028387,FBgn0036928	-|-|-|-|-|-|-|-|-|-|-|
GO:0005262	calcium channel activity	molecular_function	0.031673	1	3	366	20	10392	FBgn0027581,FBgn0266489,FBgn0001138	-|-|-|
GO:0009063	cellular amino acid catabolic process	biological_process	0.031677	1	3	366	20	10392	FBgn0034276,FBgn0030612,FBgn0005655	-|-|-|
GO:0005623	cell	cellular_component	0.033058	1	129	366	3193	10392	FBgn0053861,FBgn0084001,FBgn0259683,FBgn0036496,FBgn0034274,FBgn0036498,FBgn0022740,FBgn0032083,FBgn0053872,FBgn0005655,FBgn0085450,FBgn0001138,FBgn0010812,FBgn0024556,FBgn0030617,FBgn0263144,Novel000234,FBgn0014877,FBgn0033074,FBgn0053156,FBgn0266429,FBgn0015799,FBgn0036932,FBgn0040477,FBgn0039966,FBgn0031904,FBgn0010411,FBgn0034489,FBgn0263774,FBgn0030610,FBgn0016976,FBgn0032987,FBgn0034265,FBg…	-|-|-|-|-|-|-|-|-|-|-|-|-|-|-|-|-|-|-|-|-|-|-|-|-|-|-|-|-|-|-|-|-|-|-|-|-|-|-|-|-|-|-|-|-|-|-|-|-|-|-|-|-|-|-|-|-|-|-|-|-|-|-|-|-|-|-|-|-|-|-|-|-|-|-|-|-|-|-|-|-|-|-|-|-|-|-|-|-|-|-|-|-|-|-|-|-|-|-|-|-|-|-|-|-|-|-|-|-|-|-|-|-|-|-|-|-|-|-|-|-|-|-|-|-|-|-|-
GO:0044464	cell part	cellular_component	0.033058	1	129	366	3193	10392	FBgn0004228,FBgn0052791,FBgn0036923,FBgn0036494,FBgn0031941,FBgn0262519,FBgn0053864,FBgn0032077,FBgn0053857,FBgn0029123,FBgn0037539,FBgn0034276,FBgn0261802,FBgn0053859,FBgn0033065,FBgn0032956,FBgn0030612,FBgn0033855,FBgn0050431,FBgn0030600,FBgn0003016,FBgn0027872,FBgn0051703,FBgn0033856,FBgn0033860,FBgn0053860,FBgn0085569,FBgn0034265,FBgn0030616,FBgn0053862,FBgn0030610,FBgn0016976,FBgn0032987,FBg…	-|-|-|-|-|-|-|-|-|-|-|-|-|-|-|-|-|-|-|-|-|-|-|-|-|-|-|-|-|-|-|-|-|-|-|-|-|-|-|-|-|-|-|-|-|-|-|-|-|-|-|-|-|-|-|-|-|-|-|-|-|-|-|-|-|-|-|-|-|-|-|-|-|-|-|-|-|-|-|-|-|-|-|-|-|-|-|-|-|-|-|-|-|-|-|-|-|-|-|-|-|-|-|-|-|-|-|-|-|-|-|-|-|-|-|-|-|-|-|-|-|-|-|-|-|-|-|-
GO:0008484	sulfuric ester hydrolase activity	molecular_function	0.033551	1	4	366	35	10392	FBgn0260475,FBgn0052985,FBgn0052984,FBgn0033836	-|-|-|-|
GO:0015562	efflux transmembrane transporter activity	molecular_function	0.035224	1	1	366	1	10392	FBgn0032988	-|
GO:0034639	L-amino acid efflux transmembrane transporter activity	molecular_function	0.035224	1	1	366	1	10392	FBgn0032988	-|
GO:0006083	acetate metabolic process	biological_process	0.035225	1	1	366	1	10392	FBgn0034488	-|
GO:0019385	methanogenesis, from acetate	biological_process	0.035225	1	1	366	1	10392	FBgn0034488	-|
GO:0004057	arginyltransferase activity	molecular_function	0.035225	1	1	366	1	10392	FBgn0025720	-|
GO:0016598	protein arginylation	biological_process	0.035225	1	1	366	1	10392	FBgn0025720	-|
GO:0008113	peptide-methionine (S)-S-oxide reductase activity	molecular_function	0.035226	1	1	366	1	10392	FBgn0000565	-|
GO:0032787	monocarboxylic acid metabolic process	biological_process	0.036324	1	6	366	70	10392	FBgn0001099,FBgn0034488,FBgn0027572,FBgn0032955,FBgn0028377,FBgn0051875	-|-|-|-|-|-|
GO:0048878	chemical homeostasis	biological_process	0.036729	1	4	366	36	10392	FBgn0027581,FBgn0036932,FBgn0266489,FBgn0001138	-|-|-|-|
GO:0007154	cell communication	biological_process	0.03723	1	45	366	979	10392	FBgn0259148,FBgn0000535,FBgn0000180,FBgn0031914,FBgn0016701,FBgn0004852,FBgn0050106,FBgn0003475,FBgn0036497,FBgn0025836,FBgn0036932,FBgn0036494,FBgn0039966,FBgn0262519,FBgn0036934,FBgn0036926,FBgn0266429,FBgn0013303,FBgn0004009,FBgn0011584,FBgn0261571,FBgn0034276,FBgn0029664,FBgn0031902,FBgn0033853,FBgn0264449,FBgn0020880,FBgn0264895,FBgn0003448,FBgn0003016,FBgn0023416,FBgn0033845,FBgn0036929,FBg…	-|-|-|-|-|-|-|-|-|-|-|-|-|-|-|-|-|-|-|-|-|-|-|-|-|-|-|-|-|-|-|-|-|-|-|-|-|-|-|-|-|-|-|-|-|
GO:0016748	succinyltransferase activity	molecular_function	0.037813	1	2	366	9	10392	FBgn0034489,FBgn0033065	-|-|
GO:0015085	calcium ion transmembrane transporter activity	molecular_function	0.040642	1	3	366	22	10392	FBgn0027581,FBgn0266489,FBgn0001138	-|-|-|
GO:0008654	phospholipid biosynthetic process	biological_process	0.040821	1	6	366	72	10392	FBgn0033844,FBgn0266429,FBgn0034270,FBgn0051875,FBgn0031948,FBgn0032172	-|-|-|-|-|-|
GO:0006094	gluconeogenesis	biological_process	0.046184	1	2	366	10	10392	FBgn0040099,FBgn0031957	-|-|
GO:0030170	pyridoxal phosphate binding	molecular_function	0.047283	1	4	366	39	10392	FBgn0033065,FBgn0034489,FBgn0036927,FBgn0002524	-|-|-|-|
GO:0005669	transcription factor TFIID complex	cellular_component	0.047291	1	4	366	39	10392	FBgn0053869,FBgn0053872,FBgn0053868,FBgn0053870	-|-|-|-|
GO:0043229	intracellular organelle	cellular_component	0.048198	1	94	366	2284	10392	FBgn0015288,FBgn0030610,FBgn0053858,FBgn0014037,FBgn0031190,FBgn0004400,FBgn0034259,FBgn0036497,FBgn0030613,FBgn0032987,FBgn0267727,FBgn0010411,FBgn0031904,FBgn0039966,FBgn0036932,FBgn0003559,FBgn0034489,FBgn0266429,FBgn0053156,FBgn0015799,Novel000234,FBgn0033074,FBgn0014877,FBgn0053873,FBgn0053871,FBgn0030617,FBgn0028387,FBgn0001138,FBgn0010812,FBgn0085450,FBgn0263994,FBgn0260964,FBgn0033834,FBg…	-|-|-|-|-|-|-|-|-|-|-|-|-|-|-|-|-|-|-|-|-|-|-|-|-|-|-|-|-|-|-|-|-|-|-|-|-|-|-|-|-|-|-|-|-|-|-|-|-|-|-|-|-|-|-|-|-|-|-|-|-|-|-|-|-|-|-|-|-|-|-|-|-|-|-|-|-|-|-|-|-|-|-|-|-|-|-|-|-|-|-|-|-|-|
GO:0007165	signal transduction	biological_process	0.048623	1	43	366	947	10392	FBgn0024556,FBgn0027343,FBgn0031188,FBgn0036929,FBgn0023416,FBgn0020880,FBgn0264449,FBgn0003448,FBgn0264895,FBgn0037546,FBgn0037551,FBgn0034249,FBgn0000546,FBgn0031906,FBgn0004364,FBgn0052843,FBgn0040805,FBgn0031903,FBgn0262519,FBgn0036926,FBgn0036934,FBgn0039966,FBgn0036494,FBgn0036932,FBgn0025836,FBgn0036497,FBgn0003475,FBgn0050106,FBgn0031914,FBgn0000535,FBgn0259148,FBgn0000180,FBgn0016701,FBg…	-|-|-|-|-|-|-|-|-|-|-|-|-|-|-|-|-|-|-|-|-|-|-|-|-|-|-|-|-|-|-|-|-|-|-|-|-|-|-|-|-|-|-|
GO:0043226	organelle	cellular_component	0.049131	1	94	366	2286	10392	FBgn0053861,FBgn0025674,FBgn0259683,FBgn0037551,FBgn0034274,FBgn0033834,FBgn0260964,FBgn0036498,FBgn0053872,FBgn0032083,FBgn0053869,FBgn0022740,FBgn0005655,FBgn0085450,FBgn0001138,FBgn0010812,FBgn0263994,FBgn0030617,FBgn0053871,FBgn0028387,Novel000234,FBgn0053873,FBgn0014877,FBgn0033074,FBgn0053156,FBgn0266429,FBgn0015799,FBgn0036932,FBgn0031904,FBgn0039966,FBgn0010411,FBgn0267727,FBgn0034489,FBg…	-|-|-|-|-|-|-|-|-|-|-|-|-|-|-|-|-|-|-|-|-|-|-|-|-|-|-|-|-|-|-|-|-|-|-|-|-|-|-|-|-|-|-|-|-|-|-|-|-|-|-|-|-|-|-|-|-|-|-|-|-|-|-|-|-|-|-|-|-|-|-|-|-|-|-|-|-|-|-|-|-|-|-|-|-|-|-|-|-|-|-|-|-|-|
GO:1901681	sulfur compound binding	molecular_function	0.050745	1	3	366	24	10392	FBgn0034488,FBgn0029657,FBgn0034261	-|-|-|
GO:0009312	oligosaccharide biosynthetic process	biological_process	0.050755	1	3	366	24	10392	FBgn0263144,FBgn0031908,FBgn0031907	-|-|-|
GO:0044455	mitochondrial membrane part	cellular_component	0.052056	1	8	366	116	10392	FBgn0028387,FBgn0036928,FBgn0034274,FBgn0259683,FBgn0031941,FBgn0031194,Novel000234,FBgn0050109	-|-|-|-|-|-|-|-|
GO:0043231	intracellular membrane-bounded organelle	cellular_component	0.052607	1	79	366	1891	10392	FBgn0053873,FBgn0033074,FBgn0014877,Novel000234,FBgn0015799,FBgn0053156,FBgn0266429,FBgn0034489,FBgn0003559,FBgn0039966,FBgn0036932,FBgn0267727,FBgn0036497,FBgn0030613,FBgn0053858,FBgn0014037,FBgn0031190,FBgn0034259,FBgn0004400,FBgn0030610,FBgn0025674,FBgn0259683,FBgn0037551,FBgn0053861,FBgn0036498,FBgn0005655,FBgn0053872,FBgn0022740,FBgn0053869,FBgn0033834,FBgn0034274,FBgn0263994,FBgn0001138,FBg…	-|-|-|-|-|-|-|-|-|-|-|-|-|-|-|-|-|-|-|-|-|-|-|-|-|-|-|-|-|-|-|-|-|-|-|-|-|-|-|-|-|-|-|-|-|-|-|-|-|-|-|-|-|-|-|-|-|-|-|-|-|-|-|-|-|-|-|-|-|-|-|-|-|-|-|-|-|-|-|
GO:0043227	membrane-bounded organelle	cellular_component	0.054229	1	79	366	1894	10392	FBgn0031941,FBgn0002524,FBgn0031194,FBgn0051702,FBgn0262519,FBgn0036923,FBgn0036494,Novel000089,FBgn0032184,FBgn0052791,FBgn0033859,FBgn0016701,FBgn0259148,FBgn0034277,FBgn0033065,FBgn0031196,FBgn0039941,FBgn0029667,FBgn0037539,FBgn0052220,FBgn0053864,FBgn0036924,FBgn0036920,FBgn0051703,FBgn0034503,FBgn0050431,FBgn0030600,FBgn0053868,FBgn0003016,FBgn0033855,FBgn0030605,FBgn0000546,FBgn0034265,FBg…	-|-|-|-|-|-|-|-|-|-|-|-|-|-|-|-|-|-|-|-|-|-|-|-|-|-|-|-|-|-|-|-|-|-|-|-|-|-|-|-|-|-|-|-|-|-|-|-|-|-|-|-|-|-|-|-|-|-|-|-|-|-|-|-|-|-|-|-|-|-|-|-|-|-|-|-|-|-|-|
GO:0034622	cellular macromolecular complex assembly	biological_process	0.054311	1	8	366	117	10392	FBgn0053861,FBgn0043456,FBgn0036929,FBgn0053858,FBgn0001983,FBgn0053864,FBgn0004228,FBgn0030614	-|-|-|-|-|-|-|-|
GO:0033178	proton-transporting two-sector ATPase complex, catalytic domain	cellular_component	0.055156	1	4	366	41	10392	FBgn0267727,FBgn0010812,FBgn0050109,FBgn0034274	-|-|-|-|
GO:0048513	organ development	biological_process	0.055159	1	2	366	11	10392	FBgn0039944,FBgn0039945	-|-|
GO:0000221	vacuolar proton-transporting V-type ATPase, V1 domain	cellular_component	0.05516	1	2	366	11	10392	FBgn0010812,FBgn0267727	-|-|
GO:0005773	vacuole	cellular_component	0.05516	1	2	366	11	10392	FBgn0010812,FBgn0267727	-|-|
GO:0005774	vacuolar membrane	cellular_component	0.05516	1	2	366	11	10392	FBgn0267727,FBgn0010812	-|-|
GO:0016471	vacuolar proton-transporting V-type ATPase complex	cellular_component	0.05516	1	2	366	11	10392	FBgn0010812,FBgn0267727	-|-|
GO:0044437	vacuolar part	cellular_component	0.05516	1	2	366	11	10392	FBgn0267727,FBgn0010812	-|-|
GO:0019319	hexose biosynthetic process	biological_process	0.055161	1	2	366	11	10392	FBgn0031957,FBgn0040099	-|-|
GO:0046364	monosaccharide biosynthetic process	biological_process	0.055161	1	2	366	11	10392	FBgn0031957,FBgn0040099	-|-|
GO:0000275	mitochondrial proton-transporting ATP synthase complex, catalytic core F(1)	cellular_component	0.055161	1	2	366	11	10392	FBgn0034274,FBgn0050109	-|-|
GO:0006546	glycine catabolic process	biological_process	0.055163	1	2	366	11	10392	FBgn0034276,FBgn0030612	-|-|
GO:0009071	serine family amino acid catabolic process	biological_process	0.055163	1	2	366	11	10392	FBgn0034276,FBgn0030612	-|-|
GO:0048037	cofactor binding	molecular_function	0.061885	1	16	366	298	10392	FBgn0264895,FBgn0069973,FBgn0034500,FBgn0034489,FBgn0002524,FBgn0034488,FBgn0029006,FBgn0025687,FBgn0036927,FBgn0263830,FBgn0033856,FBgn0034258,FBgn0033065,FBgn0034487,FBgn0034276,FBgn0043456	-|-|-|-|-|-|-|-|-|-|-|-|-|-|-|-|
GO:0030131	clathrin adaptor complex	cellular_component	0.064685	1	2	366	12	10392	FBgn0016976,FBgn0016975	-|-|
GO:0016755	transferase activity, transferring amino-acyl groups	molecular_function	0.064688	1	2	366	12	10392	FBgn0025837,FBgn0025720	-|-|
GO:0016569	covalent chromatin modification	biological_process	0.06469	1	2	366	12	10392	FBgn0051702,FBgn0051703	-|-|
GO:0016570	histone modification	biological_process	0.06469	1	2	366	12	10392	FBgn0051702,FBgn0051703	-|-|
GO:0006739	NADP metabolic process	biological_process	0.067955	1	3	366	27	10392	FBgn0053156,FBgn0043456,FBgn0033853	-|-|-|
GO:0006858	extracellular transport	biological_process	0.069104	1	1	366	2	10392	FBgn0265002	-|
GO:0031854	orexigenic neuropeptide QRFP receptor binding	molecular_function	0.069148	1	1	366	2	10392	FBgn0085450	-|
GO:0007029	endoplasmic reticulum organization	biological_process	0.069151	1	1	366	2	10392	FBgn0266429	-|
GO:0003848	2-amino-4-hydroxy-6-hydroxymethyldihydropteridine diphosphokinase activity	molecular_function	0.069204	1	1	366	2	10392	FBgn0261800	-|
GO:0000087	M phase of mitotic cell cycle	biological_process	0.069208	1	1	366	2	10392	FBgn0029667	-|
GO:0006081	cellular aldehyde metabolic process	biological_process	0.06921	1	1	366	2	10392	FBgn0051875	-|
GO:0006090	pyruvate metabolic process	biological_process	0.06921	1	1	366	2	10392	FBgn0051875	-|
GO:0009240	isopentenyl diphosphate biosynthetic process	biological_process	0.06921	1	1	366	2	10392	FBgn0051875	-|
GO:0019288	isopentenyl diphosphate biosynthetic process, mevalonate-independent pathway	biological_process	0.06921	1	1	366	2	10392	FBgn0051875	-|
GO:0019682	glyceraldehyde-3-phosphate metabolic process	biological_process	0.06921	1	1	366	2	10392	FBgn0051875	-|
GO:0046490	isopentenyl diphosphate metabolic process	biological_process	0.06921	1	1	366	2	10392	FBgn0051875	-|
GO:0045926	negative regulation of growth	biological_process	0.069212	1	1	366	2	10392	FBgn0033075	-|
GO:0050750	low-density lipoprotein particle receptor binding	molecular_function	0.069212	1	1	366	2	10392	FBgn0034261	-|
GO:0070325	lipoprotein particle receptor binding	molecular_function	0.069212	1	1	366	2	10392	FBgn0034261	-|
GO:0033743	peptide-methionine (R)-S-oxide reductase activity	molecular_function	0.069213	1	1	366	2	10392	FBgn0030616	-|
GO:0005092	GDP-dissociation inhibitor activity	molecular_function	0.069213	1	1	366	2	10392	FBgn0036921	-|
GO:0005094	Rho GDP-dissociation inhibitor activity	molecular_function	0.069213	1	1	366	2	10392	FBgn0036921	-|
GO:0060966	regulation of gene silencing by RNA	biological_process	0.069213	1	1	366	2	10392	FBgn0013746	-|
GO:0060967	negative regulation of gene silencing by RNA	biological_process	0.069213	1	1	366	2	10392	FBgn0013746	-|
GO:0060968	regulation of gene silencing	biological_process	0.069213	1	1	366	2	10392	FBgn0013746	-|
GO:0060969	negative regulation of gene silencing	biological_process	0.069213	1	1	366	2	10392	FBgn0013746	-|
GO:0001919	regulation of receptor recycling	biological_process	0.069214	1	1	366	2	10392	FBgn0036932	-|
GO:0005768	endosome	cellular_component	0.069214	1	1	366	2	10392	FBgn0036932	-|
GO:0005770	late endosome	cellular_component	0.069214	1	1	366	2	10392	FBgn0036932	-|
GO:0007040	lysosome organization	biological_process	0.069214	1	1	366	2	10392	FBgn0036932	-|
GO:0009967	positive regulation of signal transduction	biological_process	0.069214	1	1	366	2	10392	FBgn0036932	-|
GO:0010008	endosome membrane	cellular_component	0.069214	1	1	366	2	10392	FBgn0036932	-|
GO:0010243	response to organonitrogen compound	biological_process	0.069214	1	1	366	2	10392	FBgn0036932	-|
GO:0010647	positive regulation of cell communication	biological_process	0.069214	1	1	366	2	10392	FBgn0036932	-|
GO:0010740	positive regulation of intracellular protein kinase cascade	biological_process	0.069214	1	1	366	2	10392	FBgn0036932	-|
GO:0023056	positive regulation of signaling	biological_process	0.069214	1	1	366	2	10392	FBgn0036932	-|
GO:0031902	late endosome membrane	cellular_component	0.069214	1	1	366	2	10392	FBgn0036932	-|
GO:0032008	positive regulation of TOR signaling cascade	biological_process	0.069214	1	1	366	2	10392	FBgn0036932	-|
GO:0032439	endosome localization	biological_process	0.069214	1	1	366	2	10392	FBgn0036932	-|
GO:0042632	cholesterol homeostasis	biological_process	0.069214	1	1	366	2	10392	FBgn0036932	-|
GO:0043200	response to amino acid stimulus	biological_process	0.069214	1	1	366	2	10392	FBgn0036932	-|
GO:0043410	positive regulation of MAPK cascade	biological_process	0.069214	1	1	366	2	10392	FBgn0036932	-|
GO:0044440	endosomal part	cellular_component	0.069214	1	1	366	2	10392	FBgn0036932	-|
GO:0045121	membrane raft	cellular_component	0.069214	1	1	366	2	10392	FBgn0036932	-|
GO:0048584	positive regulation of response to stimulus	biological_process	0.069214	1	1	366	2	10392	FBgn0036932	-|
GO:0051640	organelle localization	biological_process	0.069214	1	1	366	2	10392	FBgn0036932	-|
GO:0055088	lipid homeostasis	biological_process	0.069214	1	1	366	2	10392	FBgn0036932	-|
GO:0055092	sterol homeostasis	biological_process	0.069214	1	1	366	2	10392	FBgn0036932	-|
GO:0071230	cellular response to amino acid stimulus	biological_process	0.069214	1	1	366	2	10392	FBgn0036932	-|
GO:0071417	cellular response to organonitrogen compound	biological_process	0.069214	1	1	366	2	10392	FBgn0036932	-|
GO:0071986	Ragulator complex	cellular_component	0.069214	1	1	366	2	10392	FBgn0036932	-|
GO:1901698	response to nitrogen compound	biological_process	0.069214	1	1	366	2	10392	FBgn0036932	-|
GO:1901699	cellular response to nitrogen compound	biological_process	0.069214	1	1	366	2	10392	FBgn0036932	-|
GO:1901700	response to oxygen-containing compound	biological_process	0.069214	1	1	366	2	10392	FBgn0036932	-|
GO:1901701	cellular response to oxygen-containing compound	biological_process	0.069214	1	1	366	2	10392	FBgn0036932	-|
GO:0030337	DNA polymerase processivity factor activity	molecular_function	0.069215	1	1	366	2	10392	FBgn0260764	-|
GO:0031967	organelle envelope	cellular_component	0.073988	1	13	366	236	10392	FBgn0036920,Novel000234,FBgn0050109,FBgn0031941,FBgn0031194,FBgn0259683,FBgn0033074,FBgn0033834,FBgn0030610,FBgn0034274,FBgn0036928,FBgn0031190,FBgn0028387	-|-|-|-|-|-|-|-|-|-|-|-|-|
GO:0008137	NADH dehydrogenase (ubiquinone) activity	molecular_function	0.074195	1	3	366	28	10392	FBgn0030605,Novel000089,Novel000234	-|-|-|
GO:0050136	NADH dehydrogenase (quinone) activity	molecular_function	0.074195	1	3	366	28	10392	FBgn0030605,Novel000234,Novel000089	-|-|-|
GO:0019362	pyridine nucleotide metabolic process	biological_process	0.074203	1	3	366	28	10392	FBgn0053156,FBgn0043456,FBgn0033853	-|-|-|
GO:0046496	nicotinamide nucleotide metabolic process	biological_process	0.074203	1	3	366	28	10392	FBgn0033853,FBgn0043456,FBgn0053156	-|-|-|
GO:0016891	endoribonuclease activity, producing 5'-phosphomonoesters	molecular_function	0.07471	1	2	366	13	10392	FBgn0034249,FBgn0034246	-|-|
GO:0051087	chaperone binding	molecular_function	0.074713	1	2	366	13	10392	FBgn0004364,FBgn0014877	-|-|
GO:0048731	system development	biological_process	0.074715	1	2	366	13	10392	FBgn0039945,FBgn0039944	-|-|
GO:0016021	integral to membrane	cellular_component	0.076801	1	69	366	1663	10392	FBgn0025697,FBgn0260855,FBgn0039946,FBgn0030617,FBgn0013746,FBgn0024556,FBgn0263994,FBgn0069938,FBgn0001138,FBgn0032074,FBgn0028868,FBgn0011705,FBgn0260964,FBgn0086368,FBgn0033834,FBgn0034259,FBgn0014037,FBgn0031190,FBgn0050106,FBgn0027581,FBgn0004852,FBgn0265767,FBgn0039966,FBgn0011584,FBgn0036501,FBgn0266429,FBgn0014877,FBgn0034266,Novel000234,FBgn0266489,FBgn0051693,FBgn0030600,FBgn0086604,FBg…	-|-|-|-|-|-|-|-|-|-|-|-|-|-|-|-|-|-|-|-|-|-|-|-|-|-|-|-|-|-|-|-|-|-|-|-|-|-|-|-|-|-|-|-|-|-|-|-|-|-|-|-|-|-|-|-|-|-|-|-|-|-|-|-|-|-|-|-|-|
GO:0005575	cellular_component	cellular_component	0.078981	1	217	366	5774	10392	FBgn0267727,FBgn0053863,FBgn0033072,FBgn0265767,FBgn0003559,FBgn0036921,FBgn0032969,FBgn0261574,FBgn0040294,FBgn0015288,FBgn0004852,FBgn0034259,FBgn0004400,FBgn0031190,FBgn0053858,FBgn0014037,FBgn0029535,FBgn0027581,FBgn0036497,FBgn0030613,FBgn0031910,FBgn0029664,FBgn0032949,FBgn0031902,FBgn0053873,FBgn0011584,FBgn0033848,FBgn0036501,FBgn0016975,FBgn0013746,FBgn0263994,FBgn0039946,FBgn0053871,FBg…	-|-|-|-|-|-|-|-|-|-|-|-|-|-|-|-|-|-|-|-|-|-|-|-|-|-|-|-|-|-|-|-|-|-|-|-|-|-|-|-|-|-|-|-|-|-|-|-|-|-|-|-|-|-|-|-|-|-|-|-|-|-|-|-|-|-|-|-|-|-|-|-|-|-|-|-|-|-|-|-|-|-|-|-|-|-|-|-|-|-|-|-|-|-|-|-|-|-|-|-|-|-|-|-|-|-|-|-|-|-|-|-|-|-|-|-|-|-|-|-|-|-|-|-|-|-|-|-
GO:0031090	organelle membrane	cellular_component	0.080045	1	17	366	333	10392	FBgn0010812,FBgn0267727,FBgn0036932,FBgn0036920,FBgn0031194,FBgn0031941,FBgn0028387,Novel000234,FBgn0050109,FBgn0033074,FBgn0034277,FBgn0259683,FBgn0266429,FBgn0036924,FBgn0034274,FBgn0033834,FBgn0036928	-|-|-|-|-|-|-|-|-|-|-|-|-|-|-|-|-|
GO:0005261	cation channel activity	molecular_function	0.080049	1	7	366	106	10392	FBgn0029672,FBgn0001138,FBgn0052792,FBgn0266489,FBgn0034246,FBgn0034489,FBgn0027581	-|-|-|-|-|-|-|
GO:0006633	fatty acid biosynthetic process	biological_process	0.080682	1	3	366	29	10392	FBgn0028377,FBgn0032955,FBgn0001099	-|-|-|
GO:0006873	cellular ion homeostasis	biological_process	0.080688	1	3	366	29	10392	FBgn0027581,FBgn0001138,FBgn0266489	-|-|-|
GO:0006875	cellular metal ion homeostasis	biological_process	0.080688	1	3	366	29	10392	FBgn0001138,FBgn0266489,FBgn0027581	-|-|-|
GO:0030003	cellular cation homeostasis	biological_process	0.080688	1	3	366	29	10392	FBgn0027581,FBgn0001138,FBgn0266489	-|-|-|
GO:0006119	oxidative phosphorylation	biological_process	0.08069	1	3	366	29	10392	FBgn0259683,Novel000089,Novel000234	-|-|-|
GO:0042773	ATP synthesis coupled electron transport	biological_process	0.08069	1	3	366	29	10392	FBgn0259683,Novel000089,Novel000234	-|-|-|
GO:0009311	oligosaccharide metabolic process	biological_process	0.080693	1	3	366	29	10392	FBgn0031907,FBgn0031908,FBgn0263144	-|-|-|
GO:0072524	pyridine-containing compound metabolic process	biological_process	0.080697	1	3	366	29	10392	FBgn0033853,FBgn0053156,FBgn0043456	-|-|-|
GO:0006278	RNA-dependent DNA replication	biological_process	0.085184	1	2	366	14	10392	Novel000211,Novel000089	-|-|
GO:0030119	AP-type membrane coat adaptor complex	cellular_component	0.085197	1	2	366	14	10392	FBgn0016975,FBgn0016976	-|-|
GO:0045261	proton-transporting ATP synthase complex, catalytic core F(1)	cellular_component	0.085201	1	2	366	14	10392	FBgn0034274,FBgn0050109	-|-|
GO:0006072	glycerol-3-phosphate metabolic process	biological_process	0.085202	1	2	366	14	10392	FBgn0043456,FBgn0033856	-|-|
GO:0046168	glycerol-3-phosphate catabolic process	biological_process	0.085202	1	2	366	14	10392	FBgn0043456,FBgn0033856	-|-|
GO:0050661	NADP binding	molecular_function	0.085202	1	2	366	14	10392	FBgn0029006,FBgn0025687	-|-|
GO:0055082	cellular chemical homeostasis	biological_process	0.087417	1	3	366	30	10392	FBgn0027581,FBgn0001138,FBgn0266489	-|-|-|
GO:0006334	nucleosome assembly	biological_process	0.087432	1	3	366	30	10392	FBgn0053858,FBgn0053864,FBgn0053861	-|-|-|
GO:0031497	chromatin assembly	biological_process	0.087432	1	3	366	30	10392	FBgn0053858,FBgn0053864,FBgn0053861	-|-|-|
GO:0034728	nucleosome organization	biological_process	0.087432	1	3	366	30	10392	FBgn0053858,FBgn0053864,FBgn0053861	-|-|-|
GO:0031224	intrinsic to membrane	cellular_component	0.088737	1	69	366	1678	10392	FBgn0264389,Novel000089,FBgn0031194,FBgn0036934,FBgn0016701,FBgn0004228,FBgn0030608,FBgn0032988,FBgn0031914,FBgn0000535,FBgn0034277,FBgn0039941,FBgn0036924,FBgn0036922,FBgn0029663,FBgn0034247,FBgn0029123,FBgn0001983,FBgn0032075,FBgn0045495,FBgn0264895,FBgn0020880,FBgn0037541,FBgn0045038,FBgn0086604,FBgn0030600,FBgn0051693,FBgn0052843,FBgn0041247,FBgn0040805,FBgn0034490,FBgn0037546,FBgn0034479,FBg…	-|-|-|-|-|-|-|-|-|-|-|-|-|-|-|-|-|-|-|-|-|-|-|-|-|-|-|-|-|-|-|-|-|-|-|-|-|-|-|-|-|-|-|-|-|-|-|-|-|-|-|-|-|-|-|-|-|-|-|-|-|-|-|-|-|-|-|-|-|
GO:0007166	cell surface receptor signaling pathway	biological_process	0.090191	1	15	366	291	10392	FBgn0036497,FBgn0050106,FBgn0266429,FBgn0031903,FBgn0016701,FBgn0004009,FBgn0037546,FBgn0037551,FBgn0027343,FBgn0033853,FBgn0036934,FBgn0031902,FBgn0261571,FBgn0052843,FBgn0034276	-|-|-|-|-|-|-|-|-|-|-|-|-|-|-|
GO:0004673	protein histidine kinase activity	molecular_function	0.09436	1	3	366	31	10392	FBgn0034248,FBgn0020880,FBgn0031914	-|-|-|
GO:0055065	metal ion homeostasis	biological_process	0.094375	1	3	366	31	10392	FBgn0027581,FBgn0001138,FBgn0266489	-|-|-|
GO:0005753	mitochondrial proton-transporting ATP synthase complex	cellular_component	0.095317	1	5	366	69	10392	Novel000234,FBgn0050109,FBgn0034274,FBgn0028387,FBgn0031941	-|-|-|-|-|
GO:0019069	viral capsid assembly	biological_process	0.096088	1	2	366	15	10392	FBgn0031910,FBgn0004638	-|-|
GO:0003964	RNA-directed DNA polymerase activity	molecular_function	0.096089	1	2	366	15	10392	Novel000211,Novel000089	-|-|
GO:0033180	proton-transporting V-type ATPase, V1 domain	cellular_component	0.096093	1	2	366	15	10392	FBgn0010812,FBgn0267727	-|-|
GO:0052646	alditol phosphate metabolic process	biological_process	0.096096	1	2	366	15	10392	FBgn0033856,FBgn0043456	-|-|
GO:0031975	envelope	cellular_component	0.099275	1	13	366	248	10392	FBgn0259683,FBgn0033074,FBgn0031941,FBgn0031194,Novel000234,FBgn0050109,FBgn0036920,FBgn0031190,FBgn0028387,FBgn0036928,FBgn0033834,FBgn0030610,FBgn0034274	-|-|-|-|-|-|-|-|-|-|-|-|-|
GO:0005525	GTP binding	molecular_function	0.1005	1	15	366	296	10392	FBgn0024556,FBgn0037551,FBgn0014877,FBgn0033842,FBgn0000559,FBgn0031906,FBgn0266489,FBgn0031957,FBgn0039966,FBgn0040099,FBgn0034493,FBgn0032167,FBgn0036497,FBgn0027581,FBgn0016701	-|-|-|-|-|-|-|-|-|-|-|-|-|-|-|
GO:0004564	beta-fructofuranosidase activity	molecular_function	0.10153	1	3	366	32	10392	Novel000234,FBgn0004228,FBgn0031959	-|-|-|
GO:0004575	sucrose alpha-glucosidase activity	molecular_function	0.10153	1	3	366	32	10392	FBgn0031959,FBgn0004228,Novel000234	-|-|-|
GO:0003954	NADH dehydrogenase activity	molecular_function	0.10155	1	3	366	32	10392	Novel000089,Novel000234,FBgn0030605	-|-|-|
GO:0006333	chromatin assembly or disassembly	biological_process	0.10157	1	3	366	32	10392	FBgn0053864,FBgn0053861,FBgn0053858	-|-|-|
GO:0016255	attachment of GPI anchor to protein	biological_process	0.10195	1	1	366	3	10392	FBgn0266429	-|
GO:0004506	squalene monooxygenase activity	molecular_function	0.10196	1	1	366	3	10392	FBgn0264895	-|
GO:0040008	regulation of growth	biological_process	0.10199	1	1	366	3	10392	FBgn0033075	-|
GO:0005811	lipid particle	cellular_component	0.10199	1	1	366	3	10392	FBgn0085427	-|
GO:0012511	monolayer-surrounded lipid storage body	cellular_component	0.10199	1	1	366	3	10392	FBgn0085427	-|
GO:0006959	humoral immune response	biological_process	0.102	1	1	366	3	10392	FBgn0031959	-|
GO:0042381	hemolymph coagulation	biological_process	0.102	1	1	366	3	10392	FBgn0031959	-|
GO:0003980	UDP-glucose:glycoprotein glucosyltransferase activity	molecular_function	0.102	1	1	366	3	10392	FBgn0259683	-|
GO:0019295	coenzyme M biosynthetic process	biological_process	0.102	1	1	366	3	10392	FBgn0032981	-|
GO:0019296	coenzyme M metabolic process	biological_process	0.102	1	1	366	3	10392	FBgn0032981	-|
GO:0004813	alanine-tRNA ligase activity	molecular_function	0.10201	1	1	366	3	10392	FBgn0029664	-|
GO:0006419	alanyl-tRNA aminoacylation	biological_process	0.10201	1	1	366	3	10392	FBgn0029664	-|
GO:0015179	L-amino acid transmembrane transporter activity	molecular_function	0.10201	1	1	366	3	10392	FBgn0032988	-|
GO:0043461	proton-transporting ATP synthase complex assembly	biological_process	0.10201	1	1	366	3	10392	FBgn0043456	-|
GO:0070071	proton-transporting two-sector ATPase complex assembly	biological_process	0.10201	1	1	366	3	10392	FBgn0043456	-|
GO:0070272	proton-transporting ATP synthase complex biogenesis	biological_process	0.10201	1	1	366	3	10392	FBgn0043456	-|
GO:0000165	MAPK cascade	biological_process	0.10201	1	1	366	3	10392	FBgn0036932	-|
GO:0007243	intracellular protein kinase cascade	biological_process	0.10201	1	1	366	3	10392	FBgn0036932	-|
GO:0010627	regulation of intracellular protein kinase cascade	biological_process	0.10201	1	1	366	3	10392	FBgn0036932	-|
GO:0043408	regulation of MAPK cascade	biological_process	0.10201	1	1	366	3	10392	FBgn0036932	-|
GO:0008203	cholesterol metabolic process	biological_process	0.10201	1	1	366	3	10392	FBgn0034491	-|
GO:0017182	peptidyl-diphthamide metabolic process	biological_process	0.10201	1	1	366	3	10392	FBgn0025616	-|
GO:0017183	peptidyl-diphthamide biosynthetic process from peptidyl-histidine	biological_process	0.10201	1	1	366	3	10392	FBgn0025616	-|
GO:0004411	homogentisate 1,2-dioxygenase activity	molecular_function	0.10201	1	1	366	3	10392	FBgn0005655	-|
GO:0006559	L-phenylalanine catabolic process	biological_process	0.10201	1	1	366	3	10392	FBgn0005655	-|
GO:1902222	erythrose 4-phosphate/phosphoenolpyruvate family amino acid catabolic process	biological_process	0.10201	1	1	366	3	10392	FBgn0005655	-|
GO:0005098	Ran GTPase activator activity	molecular_function	0.10201	1	1	366	3	10392	FBgn0031188	-|
GO:0015556	C4-dicarboxylate transmembrane transporter activity	molecular_function	0.10201	1	1	366	3	10392	FBgn0036928	-|
GO:0032561	guanyl ribonucleotide binding	molecular_function	0.10479	1	15	366	298	10392	FBgn0040099,FBgn0034493,FBgn0032167,FBgn0036497,FBgn0027581,FBgn0016701,FBgn0037551,FBgn0024556,FBgn0014877,FBgn0033842,FBgn0000559,FBgn0031906,FBgn0039966,FBgn0266489,FBgn0031957	-|-|-|-|-|-|-|-|-|-|-|-|-|-|-|
GO:0009165	nucleotide biosynthetic process	biological_process	0.10573	1	9	366	158	10392	FBgn0023416,FBgn0028387,FBgn0034274,FBgn0053156,FBgn0004852,FBgn0033853,FBgn0031941,FBgn0050109,Novel000234	-|-|-|-|-|-|-|-|-|
GO:0016469	proton-transporting two-sector ATPase complex	cellular_component	0.10574	1	9	366	158	10392	FBgn0039946,FBgn0034274,FBgn0028387,FBgn0261507,FBgn0050109,Novel000234,FBgn0267727,FBgn0010812,FBgn0031941	-|-|-|-|-|-|-|-|-|
GO:0019001	guanyl nucleotide binding	molecular_function	0.10698	1	15	366	299	10392	FBgn0033842,FBgn0037551,FBgn0024556,FBgn0014877,FBgn0266489,FBgn0031957,FBgn0039966,FBgn0000559,FBgn0031906,FBgn0036497,FBgn0032167,FBgn0027581,FBgn0034493,FBgn0040099,FBgn0016701	-|-|-|-|-|-|-|-|-|-|-|-|-|-|-|
GO:0042775	mitochondrial ATP synthesis coupled electron transport	biological_process	0.10735	1	2	366	16	10392	Novel000089,FBgn0259683	-|-|
GO:0030118	clathrin coat	cellular_component	0.10735	1	2	366	16	10392	FBgn0016975,FBgn0016976	-|-|
GO:0009512	cytochrome b6f complex	cellular_component	0.10736	1	2	366	16	10392	FBgn0016976,FBgn0016975	-|-|
GO:0016780	phosphotransferase activity, for other substituted phosphate groups	molecular_function	0.10736	1	2	366	16	10392	FBgn0031948,FBgn0033844	-|-|
GO:0072330	monocarboxylic acid biosynthetic process	biological_process	0.10893	1	3	366	33	10392	FBgn0032955,FBgn0028377,FBgn0001099	-|-|-|
GO:0050801	ion homeostasis	biological_process	0.10894	1	3	366	33	10392	FBgn0001138,FBgn0266489,FBgn0027581	-|-|-|
GO:0055080	cation homeostasis	biological_process	0.10894	1	3	366	33	10392	FBgn0266489,FBgn0001138,FBgn0027581	-|-|-|
GO:0000786	nucleosome	cellular_component	0.10895	1	3	366	33	10392	FBgn0053858,FBgn0053861,FBgn0053864	-|-|-|
GO:0032993	protein-DNA complex	cellular_component	0.10895	1	3	366	33	10392	FBgn0053858,FBgn0053861,FBgn0053864	-|-|-|
GO:0007155	cell adhesion	biological_process	0.11054	1	8	366	137	10392	FBgn0261574,FBgn0083973,FBgn0261800,FBgn0030617,FBgn0086604,FBgn0025697,Novel000234,FBgn0024556	-|-|-|-|-|-|-|-|
GO:0043565	sequence-specific DNA binding	molecular_function	0.11126	1	18	366	374	10392	FBgn0053862,FBgn0053873,FBgn0000546,FBgn0053859,FBgn0053860,FBgn0053857,FBgn0053869,FBgn0053872,FBgn0029657,FBgn0053870,FBgn0053865,FBgn0001138,FBgn0053863,FBgn0040477,FBgn0053868,FBgn0053866,FBgn0053871,Novel000042	-|-|-|-|-|-|-|-|-|-|-|-|-|-|-|-|-|-|
GO:0008509	anion transmembrane transporter activity	molecular_function	0.1142	1	5	366	73	10392	FBgn0034275,FBgn0036928,FBgn0051693,FBgn0037541,FBgn0032988	-|-|-|-|-|
GO:0007275	multicellular organismal development	biological_process	0.11487	1	7	366	116	10392	FBgn0030600,FBgn0039944,FBgn0031902,FBgn0265576,FBgn0039945,FBgn0031903,FBgn0004009	-|-|-|-|-|-|-|
GO:0006733	oxidoreduction coenzyme metabolic process	biological_process	0.11651	1	3	366	34	10392	FBgn0053156,FBgn0043456,FBgn0033853	-|-|-|
GO:0007267	cell-cell signaling	biological_process	0.11893	1	2	366	17	10392	FBgn0033845,FBgn0003016	-|-|
GO:0016884	carbon-nitrogen ligase activity, with glutamine as amido-N-donor	molecular_function	0.11894	1	2	366	17	10392	FBgn0037548,FBgn0037547	-|-|
GO:0000155	phosphorelay sensor kinase activity	molecular_function	0.11895	1	2	366	17	10392	FBgn0031914,FBgn0020880	-|-|
GO:0046961	proton-transporting ATPase activity, rotational mechanism	molecular_function	0.11895	1	2	366	17	10392	FBgn0010812,FBgn0050109	-|-|
GO:0006544	glycine metabolic process	biological_process	0.11895	1	2	366	17	10392	FBgn0034276,FBgn0030612	-|-|
GO:0019068	virion assembly	biological_process	0.12431	1	3	366	35	10392	FBgn0261574,FBgn0004638,FBgn0031910	-|-|-|
GO:0000785	chromatin	cellular_component	0.12432	1	3	366	35	10392	FBgn0053858,FBgn0053861,FBgn0053864	-|-|-|
GO:0009579	thylakoid	cellular_component	0.12693	1	6	366	97	10392	FBgn0052843,FBgn0036496,FBgn0016975,FBgn0016976,FBgn0084001,FBgn0001138	-|-|-|-|-|-|
GO:0044436	thylakoid part	cellular_component	0.12693	1	6	366	97	10392	FBgn0084001,FBgn0001138,FBgn0016976,FBgn0052843,FBgn0036496,FBgn0016975	-|-|-|-|-|-|
GO:0006486	protein glycosylation	biological_process	0.12783	1	4	366	55	10392	FBgn0044872,FBgn0086368,FBgn0034277,FBgn0259683	-|-|-|-|
GO:0009101	glycoprotein biosynthetic process	biological_process	0.12783	1	4	366	55	10392	FBgn0086368,FBgn0044872,FBgn0259683,FBgn0034277	-|-|-|-|
GO:0043413	macromolecule glycosylation	biological_process	0.12783	1	4	366	55	10392	FBgn0259683,FBgn0034277,FBgn0086368,FBgn0044872	-|-|-|-|
GO:0045259	proton-transporting ATP synthase complex	cellular_component	0.12931	1	5	366	76	10392	FBgn0028387,FBgn0031941,Novel000234,FBgn0050109,FBgn0034274	-|-|-|-|-|
GO:0044448	cell cortex part	cellular_component	0.13083	1	2	366	18	10392	FBgn0034271,FBgn0004228	-|-|
GO:0009719	response to endogenous stimulus	biological_process	0.13217	1	3	366	36	10392	FBgn0000546,FBgn0030600,FBgn0036932	-|-|-|
GO:0050662	coenzyme binding	molecular_function	0.13226	1	12	366	237	10392	FBgn0069973,FBgn0033856,FBgn0034500,FBgn0264895,FBgn0263830,FBgn0025687,FBgn0043456,FBgn0034487,FBgn0029006,FBgn0034276,FBgn0034258,FBgn0034488	-|-|-|-|-|-|-|-|-|-|-|-|
GO:0022904	respiratory electron transport chain	biological_process	0.13227	1	3	366	36	10392	Novel000234,Novel000089,FBgn0259683	-|-|-|
GO:0042060	wound healing	biological_process	0.13228	1	3	366	36	10392	FBgn0031959,FBgn0036929,Novel000234	-|-|-|
GO:0065004	protein-DNA complex assembly	biological_process	0.13229	1	3	366	36	10392	FBgn0053858,FBgn0053864,FBgn0053861	-|-|-|
GO:0071824	protein-DNA complex subunit organization	biological_process	0.13229	1	3	366	36	10392	FBgn0053861,FBgn0053864,FBgn0053858	-|-|-|
GO:0004064	arylesterase activity	molecular_function	0.13349	1	1	366	4	10392	FBgn0000119	-|
GO:0071855	neuropeptide receptor binding	molecular_function	0.13358	1	1	366	4	10392	FBgn0085450	-|
GO:0042765	GPI-anchor transamidase complex	cellular_component	0.13359	1	1	366	4	10392	FBgn0266429	-|
GO:0001101	response to acid	biological_process	0.13363	1	1	366	4	10392	FBgn0036932	-|
GO:0071229	cellular response to acid	biological_process	0.13363	1	1	366	4	10392	FBgn0036932	-|
GO:0045087	innate immune response	biological_process	0.13364	1	1	366	4	10392	FBgn0031959	-|
GO:0009341	beta-galactosidase complex	cellular_component	0.13364	1	1	366	4	10392	FBgn0027600	-|
GO:0006368	transcription elongation from RNA polymerase II promoter	biological_process	0.13364	1	1	366	4	10392	FBgn0014037	-|
GO:0008023	transcription elongation factor complex	cellular_component	0.13364	1	1	366	4	10392	FBgn0014037	-|
GO:0004345	glucose-6-phosphate dehydrogenase activity	molecular_function	0.13365	1	1	366	4	10392	FBgn0029006	-|
GO:0000279	M phase	biological_process	0.13365	1	1	366	4	10392	FBgn0029667	-|
GO:0022403	cell cycle phase	biological_process	0.13365	1	1	366	4	10392	FBgn0029667	-|
GO:0004525	ribonuclease III activity	molecular_function	0.13365	1	1	366	4	10392	FBgn0034246	-|
GO:0030435	sporulation resulting in formation of a cellular spore	biological_process	0.13365	1	1	366	4	10392	FBgn0033074	-|
GO:0015105	arsenite transmembrane transporter activity	molecular_function	0.13365	1	1	366	4	10392	FBgn0051693	-|
GO:0015700	arsenite transport	biological_process	0.13365	1	1	366	4	10392	FBgn0051693	-|
GO:0010277	chlorophyllide a oxygenase [overall] activity	molecular_function	0.13365	1	1	366	4	10392	FBgn0025836	-|
GO:0004417	hydroxyethylthiazole kinase activity	molecular_function	0.13365	1	1	366	4	10392	FBgn0036915	-|
GO:0006558	L-phenylalanine metabolic process	biological_process	0.13365	1	1	366	4	10392	FBgn0005655	-|
GO:1902221	erythrose 4-phosphate/phosphoenolpyruvate family amino acid metabolic process	biological_process	0.13365	1	1	366	4	10392	FBgn0005655	-|
GO:0004047	aminomethyltransferase activity	molecular_function	0.13365	1	1	366	4	10392	FBgn0034276	-|
GO:0007623	circadian rhythm	biological_process	0.13365	1	1	366	4	10392	FBgn0029672	-|
GO:0000077	DNA damage checkpoint	biological_process	0.13365	1	1	366	4	10392	FBgn0005655	-|
GO:0030896	checkpoint clamp complex	cellular_component	0.13365	1	1	366	4	10392	FBgn0005655	-|
GO:0031570	DNA integrity checkpoint	biological_process	0.13365	1	1	366	4	10392	FBgn0005655	-|
GO:0031929	TOR signaling cascade	biological_process	0.13365	1	1	366	4	10392	FBgn0036932	-|
GO:0032006	regulation of TOR signaling cascade	biological_process	0.13365	1	1	366	4	10392	FBgn0036932	-|
GO:0009100	glycoprotein metabolic process	biological_process	0.13409	1	4	366	56	10392	FBgn0044872,FBgn0086368,FBgn0259683,FBgn0034277	-|-|-|-|
GO:1901137	carbohydrate derivative biosynthetic process	biological_process	0.13864	1	16	366	337	10392	FBgn0262866,FBgn0031941,FBgn0028387,FBgn0023416,FBgn0004852,FBgn0034277,FBgn0259683,FBgn0050109,Novel000234,FBgn0044872,FBgn0266429,FBgn0086368,FBgn0034274,FBgn0032172,FBgn0052220,FBgn0034270	-|-|-|-|-|-|-|-|-|-|-|-|-|-|-|-|
GO:0004558	alpha-glucosidase activity	molecular_function	0.14037	1	3	366	37	10392	FBgn0031959,FBgn0004228,Novel000234	-|-|-|
GO:0016655	oxidoreductase activity, acting on NAD(P)H, quinone or similar compound as acceptor	molecular_function	0.1404	1	3	366	37	10392	Novel000234,Novel000089,FBgn0030605	-|-|-|
GO:1901293	nucleoside phosphate biosynthetic process	biological_process	0.14235	1	9	366	169	10392	FBgn0034274,FBgn0004852,FBgn0053156,FBgn0028387,FBgn0023416,Novel000234,FBgn0050109,FBgn0031941,FBgn0033853	-|-|-|-|-|-|-|-|-|
GO:0004383	guanylate cyclase activity	molecular_function	0.14293	1	2	366	19	10392	FBgn0004852,FBgn0023416	-|-|
GO:0006182	cGMP biosynthetic process	biological_process	0.14293	1	2	366	19	10392	FBgn0004852,FBgn0023416	-|-|
GO:0046068	cGMP metabolic process	biological_process	0.14293	1	2	366	19	10392	FBgn0023416,FBgn0004852	-|-|
GO:0052652	cyclic purine nucleotide metabolic process	biological_process	0.14293	1	2	366	19	10392	FBgn0023416,FBgn0004852	-|-|
GO:0040007	growth	biological_process	0.14297	1	2	366	19	10392	FBgn0033075,Novel000234	-|-|
GO:0015103	inorganic anion transmembrane transporter activity	molecular_function	0.14297	1	2	366	19	10392	FBgn0051693,FBgn0034275	-|-|
GO:0044769	ATPase activity, coupled to transmembrane movement of ions, rotational mechanism	molecular_function	0.14298	1	2	366	19	10392	FBgn0010812,FBgn0050109	-|-|
GO:0008176	tRNA (guanine-N7-)-methyltransferase activity	molecular_function	0.14298	1	2	366	19	10392	FBgn0037543,FBgn0263144	-|-|
GO:0006754	ATP biosynthetic process	biological_process	0.14536	1	5	366	79	10392	FBgn0050109,Novel000234,FBgn0034274,FBgn0028387,FBgn0031941	-|-|-|-|-|
GO:0006325	chromatin organization	biological_process	0.14555	1	6	366	101	10392	FBgn0030613,FBgn0051702,FBgn0053858,FBgn0053864,FBgn0051703,FBgn0053861	-|-|-|-|-|-|
GO:0006006	glucose metabolic process	biological_process	0.147	1	4	366	58	10392	FBgn0040099,FBgn0043456,FBgn0031957,FBgn0029006	-|-|-|-|
GO:0016746	transferase activity, transferring acyl groups	molecular_function	0.14725	1	10	366	194	10392	FBgn0033065,FBgn0025720,FBgn0025837,FBgn0013765,FBgn0034489,FBgn0031912,FBgn0260006,FBgn0028387,FBgn0025835,FBgn0030612	-|-|-|-|-|-|-|-|-|-|
GO:0009152	purine ribonucleotide biosynthetic process	biological_process	0.14744	1	7	366	124	10392	FBgn0034274,FBgn0004852,FBgn0050109,Novel000234,FBgn0023416,FBgn0031941,FBgn0028387	-|-|-|-|-|-|-|
GO:0030246	carbohydrate binding	molecular_function	0.14756	1	7	366	124	10392	FBgn0083973,FBgn0030617,FBgn0040502,FBgn0031910,FBgn0040099,FBgn0033067,FBgn0031918	-|-|-|-|-|-|-|
GO:0006470	protein dephosphorylation	biological_process	0.14857	1	3	366	38	10392	FBgn0029667,FBgn0243512,FBgn0031952	-|-|-|
GO:0004725	protein tyrosine phosphatase activity	molecular_function	0.14857	1	3	366	38	10392	FBgn0029667,FBgn0031952,FBgn0243512	-|-|-|
GO:0016775	phosphotransferase activity, nitrogenous group as acceptor	molecular_function	0.14868	1	3	366	38	10392	FBgn0034248,FBgn0020880,FBgn0031914	-|-|-|
GO:0006413	translational initiation	biological_process	0.1487	1	3	366	38	10392	FBgn0001138,FBgn0034258,FBgn0034249	-|-|-|
GO:0019318	hexose metabolic process	biological_process	0.15102	1	5	366	80	10392	FBgn0040099,FBgn0031957,FBgn0029006,FBgn0043456,FBgn0034271	-|-|-|-|-|
GO:0065003	macromolecular complex assembly	biological_process	0.15142	1	8	366	148	10392	FBgn0043456,FBgn0053861,FBgn0001983,FBgn0053858,FBgn0036929,FBgn0030614,FBgn0053864,FBgn0004228	-|-|-|-|-|-|-|-|
GO:0022890	inorganic cation transmembrane transporter activity	molecular_function	0.15224	1	20	366	443	10392	FBgn0034245,FBgn0265835,FBgn0029663,Novel000234,FBgn0050109,FBgn0034246,FBgn0266489,FBgn0039946,FBgn0029672,FBgn0028387,FBgn0027581,FBgn0261507,FBgn0261566,FBgn0052792,FBgn0010812,FBgn0001138,FBgn0039966,FBgn0031194,FBgn0034489,FBgn0031941	-|-|-|-|-|-|-|-|-|-|-|-|-|-|-|-|-|-|-|-|
GO:0003682	chromatin binding	molecular_function	0.15347	1	4	366	59	10392	FBgn0029531,FBgn0037540,FBgn0037539,FBgn0051875	-|-|-|-|
GO:0006082	organic acid metabolic process	biological_process	0.1537	1	15	366	318	10392	FBgn0261800,FBgn0028377,FBgn0030612,FBgn0005655,FBgn0027572,FBgn0036927,FBgn0032955,FBgn0025687,FBgn0051875,FBgn0034276,FBgn0001099,FBgn0034488,FBgn0025837,FBgn0029664,FBgn0002524	-|-|-|-|-|-|-|-|-|-|-|-|-|-|-|
GO:0019752	carboxylic acid metabolic process	biological_process	0.1537	1	15	366	318	10392	FBgn0036927,FBgn0027572,FBgn0005655,FBgn0030612,FBgn0028377,FBgn0261800,FBgn0002524,FBgn0029664,FBgn0025837,FBgn0034488,FBgn0001099,FBgn0034276,FBgn0051875,FBgn0025687,FBgn0032955	-|-|-|-|-|-|-|-|-|-|-|-|-|-|-|
GO:0043436	oxoacid metabolic process	biological_process	0.1537	1	15	366	318	10392	FBgn0029664,FBgn0025837,FBgn0001099,FBgn0034488,FBgn0002524,FBgn0032955,FBgn0025687,FBgn0034276,FBgn0051875,FBgn0005655,FBgn0036927,FBgn0027572,FBgn0028377,FBgn0261800,FBgn0030612	-|-|-|-|-|-|-|-|-|-|-|-|-|-|-|
GO:0004521	endoribonuclease activity	molecular_function	0.15533	1	2	366	20	10392	FBgn0034249,FBgn0034246	-|-|
GO:0015074	DNA integration	biological_process	0.15533	1	2	366	20	10392	Novel000089,Novel000042	-|-|
GO:0005938	cell cortex	cellular_component	0.15534	1	2	366	20	10392	FBgn0004228,FBgn0034271	-|-|
GO:0019842	vitamin binding	molecular_function	0.15534	1	2	366	20	10392	FBgn0036497,FBgn0034488	-|-|
GO:0043623	cellular protein complex assembly	biological_process	0.15665	1	5	366	81	10392	FBgn0030614,FBgn0004228,FBgn0043456,FBgn0036929,FBgn0001983	-|-|-|-|-|
GO:0008514	organic anion transmembrane transporter activity	molecular_function	0.1571	1	3	366	39	10392	FBgn0036928,FBgn0037541,FBgn0032988	-|-|-|
GO:0015926	glucosidase activity	molecular_function	0.15712	1	3	366	39	10392	FBgn0031959,FBgn0004228,Novel000234	-|-|-|
GO:0006164	purine nucleotide biosynthetic process	biological_process	0.16071	1	7	366	127	10392	Novel000234,FBgn0050109,FBgn0034274,FBgn0004852,FBgn0028387,FBgn0023416,FBgn0031941	-|-|-|-|-|-|-|
GO:0005996	monosaccharide metabolic process	biological_process	0.16235	1	5	366	82	10392	FBgn0029006,FBgn0031957,FBgn0034271,FBgn0043456,FBgn0040099	-|-|-|-|-|
GO:0016717	oxidoreductase activity, acting on paired donors, with oxidation of a pair of donors resulting in the reduction of molecular oxygen to two molecules of water	molecular_function	0.1641	1	1	366	5	10392	FBgn0027529	-|
GO:0008250	oligosaccharyltransferase complex	cellular_component	0.16416	1	1	366	5	10392	FBgn0034277	-|
GO:0004526	ribonuclease P activity	molecular_function	0.16417	1	1	366	5	10392	FBgn0034249	-|
GO:0005758	mitochondrial intermembrane space	cellular_component	0.16417	1	1	366	5	10392	FBgn0030610	-|
GO:0016530	metallochaperone activity	molecular_function	0.16417	1	1	366	5	10392	FBgn0030610	-|
GO:0016531	copper chaperone activity	molecular_function	0.16417	1	1	366	5	10392	FBgn0030610	-|
GO:0031970	organelle envelope lumen	cellular_component	0.16417	1	1	366	5	10392	FBgn0030610	-|
GO:0016125	sterol metabolic process	biological_process	0.16417	1	1	366	5	10392	FBgn0034491	-|
GO:0000921	septin ring assembly	biological_process	0.16417	1	1	366	5	10392	FBgn0004228	-|
GO:0005940	septin ring	cellular_component	0.16417	1	1	366	5	10392	FBgn0004228	-|
GO:0031106	septin ring organization	biological_process	0.16417	1	1	366	5	10392	FBgn0004228	-|
GO:0032156	septin cytoskeleton	cellular_component	0.16417	1	1	366	5	10392	FBgn0004228	-|
GO:0032185	septin cytoskeleton organization	biological_process	0.16417	1	1	366	5	10392	FBgn0004228	-|
GO:0003840	gamma-glutamyltransferase activity	molecular_function	0.16417	1	1	366	5	10392	FBgn0025837	-|
GO:0006354	DNA-dependent transcription, elongation	biological_process	0.16417	1	1	366	5	10392	FBgn0014037	-|
GO:0008762	UDP-N-acetylmuramate dehydrogenase activity	molecular_function	0.16418	1	1	366	5	10392	FBgn0034488	-|
GO:0009314	response to radiation	biological_process	0.16418	1	1	366	5	10392	FBgn0011705	-|
GO:0009416	response to light stimulus	biological_process	0.16418	1	1	366	5	10392	FBgn0011705	-|
GO:0009628	response to abiotic stimulus	biological_process	0.16418	1	1	366	5	10392	FBgn0011705	-|
GO:0008053	mitochondrial fusion	biological_process	0.16418	1	1	366	5	10392	FBgn0033834	-|
GO:0001881	receptor recycling	biological_process	0.16418	1	1	366	5	10392	FBgn0036932	-|
GO:0005960	glycine cleavage complex	cellular_component	0.16418	1	1	366	5	10392	FBgn0030612	-|
GO:0007033	vacuole organization	biological_process	0.16418	1	1	366	5	10392	FBgn0036932	-|
GO:0044446	intracellular organelle part	cellular_component	0.16648	1	43	366	1052	10392	FBgn0002938,Novel000234,FBgn0033074,FBgn0033065,FBgn0034277,FBgn0036924,FBgn0053864,FBgn0266429,FBgn0037539,FBgn0036932,FBgn0036494,FBgn0032184,Novel000089,FBgn0267727,FBgn0031194,FBgn0034489,FBgn0031941,FBgn0004228,FBgn0030610,FBgn0259148,FBgn0034259,FBgn0053858,FBgn0031190,FBgn0014037,FBgn0050109,FBgn0053861,FBgn0034265,FBgn0259683,FBgn0030614,FBgn0053870,FBgn0034274,FBgn0033834,FBgn0029531,FBg…	-|-|-|-|-|-|-|-|-|-|-|-|-|-|-|-|-|-|-|-|-|-|-|-|-|-|-|-|-|-|-|-|-|-|-|-|-|-|-|-|-|-|-|
GO:0033176	proton-transporting V-type ATPase complex	cellular_component	0.16716	1	4	366	61	10392	FBgn0039946,FBgn0010812,FBgn0267727,FBgn0261507	-|-|-|-|
GO:0015672	monovalent inorganic cation transport	biological_process	0.16738	1	14	366	298	10392	FBgn0028387,FBgn0051693,FBgn0261507,FBgn0033856,FBgn0029672,FBgn0039946,FBgn0031941,FBgn0034489,FBgn0267727,FBgn0010812,Novel000234,FBgn0052792,FBgn0050109,FBgn0034246	-|-|-|-|-|-|-|-|-|-|-|-|-|-|
GO:0044699	single-organism process	biological_process	0.16773	1	129	366	3408	10392	FBgn0029663,FBgn0040099,FBgn0053864,FBgn0261800,FBgn0029662,FBgn0034246,FBgn0034276,FBgn0003475,FBgn0052791,FBgn0083973,FBgn0004228,FBgn0000535,FBgn0031941,FBgn0036926,FBgn0262519,FBgn0036494,FBgn0085569,FBgn0033856,FBgn0034490,FBgn0004364,FBgn0036929,FBgn0086604,FBgn0030600,FBgn0051693,FBgn0003016,FBgn0264895,FBgn0003448,FBgn0020880,FBgn0027343,FBgn0021764,FBgn0051703,FBgn0015799,FBgn0013303,FBg…	-|-|-|-|-|-|-|-|-|-|-|-|-|-|-|-|-|-|-|-|-|-|-|-|-|-|-|-|-|-|-|-|-|-|-|-|-|-|-|-|-|-|-|-|-|-|-|-|-|-|-|-|-|-|-|-|-|-|-|-|-|-|-|-|-|-|-|-|-|-|-|-|-|-|-|-|-|-|-|-|-|-|-|-|-|-|-|-|-|-|-|-|-|-|-|-|-|-|-|-|-|-|-|-|-|-|-|-|-|-|-|-|-|-|-|-|-|-|-|-|-|-|-|-|-|-|-|-
GO:0016423	tRNA (guanine) methyltransferase activity	molecular_function	0.1679	1	2	366	21	10392	FBgn0037543,FBgn0263144	-|-|
GO:0009142	nucleoside triphosphate biosynthetic process	biological_process	0.168	1	5	366	83	10392	FBgn0028387,FBgn0031941,Novel000234,FBgn0050109,FBgn0034274	-|-|-|-|-|
GO:0009145	purine nucleoside triphosphate biosynthetic process	biological_process	0.168	1	5	366	83	10392	FBgn0031941,FBgn0028387,FBgn0034274,FBgn0050109,Novel000234	-|-|-|-|-|
GO:0009201	ribonucleoside triphosphate biosynthetic process	biological_process	0.168	1	5	366	83	10392	FBgn0031941,FBgn0028387,FBgn0034274,Novel000234,FBgn0050109	-|-|-|-|-|
GO:0009206	purine ribonucleoside triphosphate biosynthetic process	biological_process	0.168	1	5	366	83	10392	FBgn0034274,FBgn0050109,Novel000234,FBgn0031941,FBgn0028387	-|-|-|-|-|
GO:0009260	ribonucleotide biosynthetic process	biological_process	0.16985	1	7	366	129	10392	FBgn0050109,Novel000234,FBgn0004852,FBgn0034274,FBgn0028387,FBgn0031941,FBgn0023416	-|-|-|-|-|-|-|
GO:0046390	ribose phosphate biosynthetic process	biological_process	0.16985	1	7	366	129	10392	FBgn0034274,FBgn0004852,FBgn0050109,Novel000234,FBgn0023416,FBgn0031941,FBgn0028387	-|-|-|-|-|-|-|
GO:0044763	single-organism cellular process	biological_process	0.17107	1	110	366	2883	10392	FBgn0005655,FBgn0028868,FBgn0036498,FBgn0031903,FBgn0086368,FBgn0260964,FBgn0016059,FBgn0033834,FBgn0051619,FBgn0034249,FBgn0031959,FBgn0037551,FBgn0053861,FBgn0025697,FBgn0028387,FBgn0261507,FBgn0023416,FBgn0033845,FBgn0039946,FBgn0030617,FBgn0013746,FBgn0024556,FBgn0001138,FBgn0010812,FBgn0016975,FBgn0031188,FBgn0011584,FBgn0015799,FBgn0266429,FBgn0004009,FBgn0013303,FBgn0029664,FBgn0033074,FBg…	-|-|-|-|-|-|-|-|-|-|-|-|-|-|-|-|-|-|-|-|-|-|-|-|-|-|-|-|-|-|-|-|-|-|-|-|-|-|-|-|-|-|-|-|-|-|-|-|-|-|-|-|-|-|-|-|-|-|-|-|-|-|-|-|-|-|-|-|-|-|-|-|-|-|-|-|-|-|-|-|-|-|-|-|-|-|-|-|-|-|-|-|-|-|-|-|-|-|-|-|-|-|-|-|-|-|-|-|-|-|
GO:0045333	cellular respiration	biological_process	0.17408	1	4	366	62	10392	Novel000234,Novel000089,FBgn0034488,FBgn0259683	-|-|-|-|
GO:0044422	organelle part	cellular_component	0.17782	1	43	366	1059	10392	FBgn0034277,FBgn0033065,FBgn0033074,FBgn0002938,Novel000234,FBgn0037539,FBgn0036924,FBgn0053864,FBgn0266429,FBgn0031941,FBgn0031194,FBgn0034489,FBgn0036494,FBgn0036932,FBgn0267727,Novel000089,FBgn0032184,FBgn0053858,FBgn0031190,FBgn0014037,FBgn0034259,FBgn0004228,FBgn0030610,FBgn0259148,FBgn0034265,FBgn0259683,FBgn0053861,FBgn0050109,FBgn0029531,FBgn0036928,FBgn0005655,FBgn0053872,FBgn0053869,FBg…	-|-|-|-|-|-|-|-|-|-|-|-|-|-|-|-|-|-|-|-|-|-|-|-|-|-|-|-|-|-|-|-|-|-|-|-|-|-|-|-|-|-|-|
GO:0022607	cellular component assembly	biological_process	0.17901	1	12	366	252	10392	FBgn0053861,FBgn0043456,FBgn0004638,FBgn0029664,FBgn0031910,FBgn0261574,FBgn0053864,FBgn0004228,FBgn0030614,FBgn0036929,FBgn0053858,FBgn0001983	-|-|-|-|-|-|-|-|-|-|-|-|
GO:0022610	biological adhesion	biological_process	0.18061	1	8	366	155	10392	FBgn0261800,FBgn0030617,FBgn0261574,FBgn0083973,FBgn0025697,FBgn0086604,Novel000234,FBgn0024556	-|-|-|-|-|-|-|-|
GO:0008121	ubiquinol-cytochrome-c reductase activity	molecular_function	0.18062	1	2	366	22	10392	FBgn0034245,FBgn0261566	-|-|
GO:0016681	oxidoreductase activity, acting on diphenols and related substances as donors, cytochrome as acceptor	molecular_function	0.18062	1	2	366	22	10392	FBgn0034245,FBgn0261566	-|-|
GO:0009069	serine family amino acid metabolic process	biological_process	0.18063	1	2	366	22	10392	FBgn0030612,FBgn0034276	-|-|
GO:0006631	fatty acid metabolic process	biological_process	0.1811	1	4	366	63	10392	FBgn0032955,FBgn0028377,FBgn0001099,FBgn0027572	-|-|-|-|
GO:0010033	response to organic substance	biological_process	0.18322	1	3	366	42	10392	FBgn0036932,FBgn0000546,FBgn0030600	-|-|-|
GO:0072522	purine-containing compound biosynthetic process	biological_process	0.18396	1	7	366	132	10392	FBgn0034274,FBgn0004852,FBgn0050109,Novel000234,FBgn0023416,FBgn0031941,FBgn0028387	-|-|-|-|-|-|-|
GO:0044281	small molecule metabolic process	biological_process	0.18462	1	30	366	717	10392	FBgn0032955,FBgn0025687,FBgn0031941,FBgn0002524,FBgn0036915,FBgn0001099,FBgn0034488,FBgn0025837,FBgn0004852,FBgn0030612,FBgn0028377,FBgn0023416,FBgn0083968,FBgn0028387,FBgn0051875,FBgn0034276,Novel000234,FBgn0050109,FBgn0043456,FBgn0033853,FBgn0029664,FBgn0053156,FBgn0033834,FBgn0034274,FBgn0261800,FBgn0027572,FBgn0034491,FBgn0028868,FBgn0036927,FBgn0005655	-|-|-|-|-|-|-|-|-|-|-|-|-|-|-|-|-|-|-|-|-|-|-|-|-|-|-|-|-|-|
GO:0019867	outer membrane	cellular_component	0.18592	1	5	366	86	10392	FBgn0033074,FBgn0036928,FBgn0031194,FBgn0033834,FBgn0036920	-|-|-|-|-|
GO:0009108	coenzyme biosynthetic process	biological_process	0.18821	1	4	366	64	10392	FBgn0053156,FBgn0261800,FBgn0033853,FBgn0032981	-|-|-|-|
GO:0051082	unfolded protein binding	molecular_function	0.18823	1	4	366	64	10392	FBgn0029662,FBgn0030614,FBgn0037539,FBgn0036918	-|-|-|-|
GO:0004721	phosphoprotein phosphatase activity	molecular_function	0.19217	1	3	366	43	10392	FBgn0029667,FBgn0031952,FBgn0243512	-|-|-|
GO:0006497	protein lipidation	biological_process	0.19219	1	3	366	43	10392	FBgn0032172,FBgn0034270,FBgn0266429	-|-|-|
GO:0006506	GPI anchor biosynthetic process	biological_process	0.19219	1	3	366	43	10392	FBgn0034270,FBgn0032172,FBgn0266429	-|-|-|
GO:0006661	phosphatidylinositol biosynthetic process	biological_process	0.19219	1	3	366	43	10392	FBgn0032172,FBgn0034270,FBgn0266429	-|-|-|
GO:0005272	sodium channel activity	molecular_function	0.19219	1	3	366	43	10392	FBgn0034489,FBgn0029672,FBgn0052792	-|-|-|
GO:0031683	G-protein beta/gamma-subunit complex binding	molecular_function	0.19232	1	3	366	43	10392	FBgn0016701,FBgn0037551,FBgn0036497	-|-|-|
GO:0016817	hydrolase activity, acting on acid anhydrides	molecular_function	0.19337	1	27	366	643	10392	FBgn0000056,FBgn0039966,FBgn0001138,FBgn0267727,FBgn0010812,FBgn0000559,FBgn0003545,FBgn0024556,FBgn0262519,FBgn0016701,FBgn0051755,FBgn0000055,FBgn0036497,FBgn0037549,FBgn0034246,FBgn0034496,FBgn0002938,FBgn0031906,FBgn0050109,FBgn0031955,FBgn0037551,FBgn0014877,FBgn0033834,FBgn0034274,FBgn0032167,FBgn0028868,FBgn0034493	-|-|-|-|-|-|-|-|-|-|-|-|-|-|-|-|-|-|-|-|-|-|-|-|-|-|-|
GO:0000160	phosphorelay signal transduction system	biological_process	0.19349	1	2	366	23	10392	FBgn0020880,FBgn0031914	-|-|
GO:0035091	phosphatidylinositol binding	molecular_function	0.19349	1	2	366	23	10392	FBgn0033075,FBgn0034265	-|-|
GO:0001664	G-protein coupled receptor binding	molecular_function	0.19357	1	1	366	6	10392	FBgn0085450	-|
GO:0004016	adenylate cyclase activity	molecular_function	0.1936	1	1	366	6	10392	FBgn0004852	-|
GO:0006730	one-carbon metabolic process	biological_process	0.19361	1	1	366	6	10392	FBgn0083968	-|
GO:0008093	cytoskeletal adaptor activity	molecular_function	0.19362	1	1	366	6	10392	FBgn0029664	-|
GO:0017124	SH3 domain binding	molecular_function	0.19362	1	1	366	6	10392	FBgn0029664	-|
GO:0046847	filopodium assembly	biological_process	0.19362	1	1	366	6	10392	FBgn0029664	-|
GO:0006493	protein O-linked glycosylation	biological_process	0.19362	1	1	366	6	10392	FBgn0086368	-|
GO:0007021	tubulin complex assembly	biological_process	0.19363	1	1	366	6	10392	FBgn0030614	-|
GO:0072668	tubulin complex biogenesis	biological_process	0.19363	1	1	366	6	10392	FBgn0030614	-|
GO:0004565	beta-galactosidase activity	molecular_function	0.19363	1	1	366	6	10392	FBgn0027600	-|
GO:0015925	galactosidase activity	molecular_function	0.19363	1	1	366	6	10392	FBgn0027600	-|
GO:0008641	small protein activating enzyme activity	molecular_function	0.19363	1	1	366	6	10392	FBgn0037549	-|
GO:0031047	gene silencing by RNA	biological_process	0.19363	1	1	366	6	10392	FBgn0013746	-|
GO:0030515	snoRNA binding	molecular_function	0.19363	1	1	366	6	10392	FBgn0263774	-|
GO:0072588	box H/ACA RNP complex	cellular_component	0.19363	1	1	366	6	10392	FBgn0263774	-|
GO:0009074	aromatic amino acid family catabolic process	biological_process	0.19363	1	1	366	6	10392	FBgn0005655	-|
GO:0006487	protein N-linked glycosylation	biological_process	0.19363	1	1	366	6	10392	FBgn0034277	-|
GO:0048511	rhythmic process	biological_process	0.19364	1	1	366	6	10392	FBgn0029672	-|
GO:0015740	C4-dicarboxylate transport	biological_process	0.19364	1	1	366	6	10392	FBgn0036928	-|
GO:0006352	DNA-dependent transcription, initiation	biological_process	0.19704	1	9	366	183	10392	FBgn0051703,FBgn0053873,FBgn0051702,FBgn0053870,FBgn0053871,FBgn0033855,FBgn0053868,FBgn0053872,FBgn0053869	-|-|-|-|-|-|-|-|-|
GO:0046034	ATP metabolic process	biological_process	0.19808	1	5	366	88	10392	FBgn0034274,Novel000234,FBgn0050109,FBgn0031941,FBgn0028387	-|-|-|-|-|
GO:0044723	single-organism carbohydrate metabolic process	biological_process	0.20031	1	15	366	334	10392	FBgn0031957,FBgn0263144,FBgn0029006,FBgn0034271,FBgn0043456,FBgn0259683,FBgn0034277,FBgn0262866,FBgn0052220,FBgn0086368,FBgn0069973,FBgn0031908,FBgn0044872,FBgn0040099,FBgn0031907	-|-|-|-|-|-|-|-|-|-|-|-|-|-|-|
GO:0032991	macromolecular complex	cellular_component	0.20099	1	62	366	1587	10392	FBgn0052843,FBgn0050109,FBgn0084001,FBgn0053861,FBgn0000546,FBgn0034265,FBgn0030616,FBgn0259683,FBgn0036496,FBgn0053870,FBgn0030614,FBgn0034274,FBgn0027600,FBgn0260964,FBgn0036928,FBgn0032083,FBgn0053872,FBgn0053869,FBgn0011272,FBgn0005655,FBgn0016975,FBgn0010812,FBgn0001138,FBgn0030612,FBgn0039946,FBgn0030617,FBgn0261507,FBgn0036918,FBgn0036929,FBgn0028387,FBgn0003016,FBgn0034503,FBgn0053868,FBg…	-|-|-|-|-|-|-|-|-|-|-|-|-|-|-|-|-|-|-|-|-|-|-|-|-|-|-|-|-|-|-|-|-|-|-|-|-|-|-|-|-|-|-|-|-|-|-|-|-|-|-|-|-|-|-|-|-|-|-|-|-|-|
GO:0042158	lipoprotein biosynthetic process	biological_process	0.20127	1	3	366	44	10392	FBgn0266429,FBgn0032172,FBgn0034270	-|-|-|
GO:0046474	glycerophospholipid biosynthetic process	biological_process	0.20127	1	3	366	44	10392	FBgn0266429,FBgn0032172,FBgn0034270	-|-|-|
GO:0001522	pseudouridine synthesis	biological_process	0.20628	1	2	366	24	10392	FBgn0043456,FBgn0263774	-|-|
GO:0009877	nodulation	biological_process	0.20646	1	2	366	24	10392	FBgn0265576,FBgn0263144	-|-|
GO:0004719	protein-L-isoaspartate (D-aspartate) O-methyltransferase activity	molecular_function	0.20647	1	2	366	24	10392	FBgn0037543,FBgn0263144	-|-|
GO:0006818	hydrogen transport	biological_process	0.20749	1	8	366	161	10392	FBgn0010812,FBgn0267727,Novel000234,FBgn0050109,FBgn0031941,FBgn0039946,FBgn0261507,FBgn0028387	-|-|-|-|-|-|-|-|
GO:0015992	proton transport	biological_process	0.20749	1	8	366	161	10392	FBgn0261507,FBgn0028387,FBgn0039946,FBgn0031941,Novel000234,FBgn0050109,FBgn0267727,FBgn0010812	-|-|-|-|-|-|-|-|
GO:0044085	cellular component biogenesis	biological_process	0.21609	1	15	366	339	10392	FBgn0053864,FBgn0261574,FBgn0030614,FBgn0004228,FBgn0036929,FBgn0053858,FBgn0001983,FBgn0263144,FBgn0033072,FBgn0053861,FBgn0043456,FBgn0004638,FBgn0263774,FBgn0031910,FBgn0029664	-|-|-|-|-|-|-|-|-|-|-|-|-|-|-|
GO:0006928	cellular component movement	biological_process	0.217	1	5	366	91	10392	FBgn0031955,FBgn0029667,FBgn0036498,FBgn0003545,FBgn0016059	-|-|-|-|-|
GO:0006732	coenzyme metabolic process	biological_process	0.2171	1	5	366	91	10392	FBgn0261800,FBgn0043456,FBgn0053156,FBgn0032981,FBgn0033853	-|-|-|-|-|
GO:0003924	GTPase activity	molecular_function	0.21864	1	11	366	238	10392	FBgn0024556,FBgn0037551,FBgn0014877,FBgn0031906,FBgn0000559,FBgn0039966,FBgn0034493,FBgn0032167,FBgn0036497,FBgn0016701,FBgn0033834	-|-|-|-|-|-|-|-|-|-|-|
GO:0009539	photosystem II reaction center	cellular_component	0.21951	1	2	366	25	10392	FBgn0036496,FBgn0084001	-|-|
GO:0005777	peroxisome	cellular_component	0.21953	1	2	366	25	10392	FBgn0027572,FBgn0085569	-|-|
GO:0042579	microbody	cellular_component	0.21953	1	2	366	25	10392	FBgn0085569,FBgn0027572	-|-|
GO:0009611	response to wounding	biological_process	0.21985	1	3	366	46	10392	FBgn0036929,FBgn0031959,Novel000234	-|-|-|
GO:0007548	sex differentiation	biological_process	0.22198	1	1	366	7	10392	FBgn0030600	-|
GO:0046660	female sex differentiation	biological_process	0.22198	1	1	366	7	10392	FBgn0030600	-|
GO:0046332	SMAD binding	molecular_function	0.222	1	1	366	7	10392	FBgn0085450	-|
GO:0000030	mannosyltransferase activity	molecular_function	0.22204	1	1	366	7	10392	FBgn0086368	-|
GO:0015099	nickel cation transmembrane transporter activity	molecular_function	0.22205	1	1	366	7	10392	FBgn0265835	-|
GO:0015675	nickel cation transport	biological_process	0.22205	1	1	366	7	10392	FBgn0265835	-|
GO:0006120	mitochondrial electron transport, NADH to ubiquinone	biological_process	0.22205	1	1	366	7	10392	Novel000089	-|
GO:0000042	protein targeting to Golgi	biological_process	0.22205	1	1	366	7	10392	FBgn0086757	-|
GO:0000301	retrograde transport, vesicle recycling within Golgi	biological_process	0.22205	1	1	366	7	10392	FBgn0086757	-|
GO:0034067	protein localization to Golgi apparatus	biological_process	0.22205	1	1	366	7	10392	FBgn0086757	-|
GO:0072600	establishment of protein localization to Golgi	biological_process	0.22205	1	1	366	7	10392	FBgn0086757	-|
GO:0048284	organelle fusion	biological_process	0.22205	1	1	366	7	10392	FBgn0033834	-|
GO:0071555	cell wall organization	biological_process	0.22205	1	1	366	7	10392	FBgn0020880	-|
GO:0010035	response to inorganic substance	biological_process	0.22205	1	1	366	7	10392	FBgn0028868	-|
GO:0010038	response to metal ion	biological_process	0.22205	1	1	366	7	10392	FBgn0028868	-|
GO:0006200	ATP catabolic process	biological_process	0.22205	1	1	366	7	10392	FBgn0034274	-|
GO:0004864	protein phosphatase inhibitor activity	molecular_function	0.22205	1	1	366	7	10392	FBgn0003448	-|
GO:0019212	phosphatase inhibitor activity	molecular_function	0.22205	1	1	366	7	10392	FBgn0003448	-|
GO:0005732	small nucleolar ribonucleoprotein complex	cellular_component	0.22205	1	1	366	7	10392	FBgn0263774	-|
GO:0031099	regeneration	biological_process	0.22205	1	1	366	7	10392	Novel000234	-|
GO:0042246	tissue regeneration	biological_process	0.22205	1	1	366	7	10392	Novel000234	-|
GO:0048589	developmental growth	biological_process	0.22205	1	1	366	7	10392	Novel000234	-|
GO:0018202	peptidyl-histidine modification	biological_process	0.22206	1	1	366	7	10392	FBgn0025616	-|
GO:0006553	lysine metabolic process	biological_process	0.22206	1	1	366	7	10392	FBgn0025687	-|
GO:0008839	4-hydroxy-tetrahydrodipicolinate reductase	molecular_function	0.22206	1	1	366	7	10392	FBgn0025687	-|
GO:0009085	lysine biosynthetic process	biological_process	0.22206	1	1	366	7	10392	FBgn0025687	-|
GO:0009089	lysine biosynthetic process via diaminopimelate	biological_process	0.22206	1	1	366	7	10392	FBgn0025687	-|
GO:0046451	diaminopimelate metabolic process	biological_process	0.22206	1	1	366	7	10392	FBgn0025687	-|
GO:0072509	divalent inorganic cation transmembrane transporter activity	molecular_function	0.22505	1	4	366	69	10392	FBgn0039966,FBgn0266489,FBgn0001138,FBgn0027581	-|-|-|-|
GO:0045017	glycerolipid biosynthetic process	biological_process	0.22906	1	3	366	47	10392	FBgn0266429,FBgn0032172,FBgn0034270	-|-|-|
GO:0022900	electron transport chain	biological_process	0.2292	1	3	366	47	10392	FBgn0259683,Novel000234,Novel000089	-|-|-|
GO:0044707	single-multicellular organism process	biological_process	0.23248	1	15	366	344	10392	FBgn0045495,FBgn0265576,FBgn0031902,FBgn0039944,FBgn0037546,FBgn0031959,FBgn0021764,FBgn0041247,Novel000089,FBgn0069938,FBgn0039945,FBgn0036929,FBgn0030600,FBgn0004009,FBgn0031903	-|-|-|-|-|-|-|-|-|-|-|-|-|-|-|
GO:0016679	oxidoreductase activity, acting on diphenols and related substances as donors	molecular_function	0.23265	1	2	366	26	10392	FBgn0034245,FBgn0261566	-|-|
GO:0017111	nucleoside-triphosphatase activity	molecular_function	0.23404	1	24	366	581	10392	FBgn0031906,FBgn0050109,FBgn0034246,FBgn0002938,FBgn0034496,FBgn0037551,FBgn0031955,FBgn0014877,FBgn0033834,FBgn0034274,FBgn0034493,FBgn0032167,FBgn0028868,FBgn0000559,FBgn0001138,FBgn0010812,FBgn0003545,FBgn0039966,FBgn0024556,FBgn0262519,FBgn0051755,FBgn0016701,FBgn0037549,FBgn0036497	-|-|-|-|-|-|-|-|-|-|-|-|-|-|-|-|-|-|-|-|-|-|-|-|
GO:0016051	carbohydrate biosynthetic process	biological_process	0.23592	1	8	366	167	10392	FBgn0031907,FBgn0040099,FBgn0052220,FBgn0069973,FBgn0031908,FBgn0262866,FBgn0031957,FBgn0263144	-|-|-|-|-|-|-|-|
GO:0015980	energy derivation by oxidation of organic compounds	biological_process	0.24027	1	4	366	71	10392	FBgn0034488,FBgn0259683,Novel000234,Novel000089	-|-|-|-|
GO:0043933	macromolecular complex subunit organization	biological_process	0.24082	1	8	366	168	10392	FBgn0001983,FBgn0053858,FBgn0036929,FBgn0030614,FBgn0053864,FBgn0004228,FBgn0043456,FBgn0053861	-|-|-|-|-|-|-|-|
GO:0015077	monovalent inorganic cation transmembrane transporter activity	molecular_function	0.24238	1	15	366	347	10392	FBgn0028387,FBgn0261507,FBgn0261566,FBgn0029663,FBgn0039946,FBgn0034245,FBgn0029672,FBgn0034489,FBgn0031194,FBgn0031941,FBgn0052792,Novel000234,FBgn0050109,FBgn0010812,FBgn0034246	-|-|-|-|-|-|-|-|-|-|-|-|-|-|-|
GO:0016020	membrane	cellular_component	0.24409	1	116	366	3111	10392	FBgn0259683,FBgn0031959,FBgn0084001,FBgn0028370,FBgn0011705,FBgn0028868,FBgn0016059,FBgn0260964,FBgn0086368,FBgn0032078,FBgn0033834,FBgn0036496,FBgn0034274,FBgn0024556,FBgn0013746,FBgn0263994,FBgn0001138,FBgn0010812,FBgn0069938,FBgn0016975,FBgn0032074,FBgn0028387,FBgn0025697,FBgn0260855,FBgn0261507,FBgn0029672,FBgn0030617,FBgn0039946,FBgn0032949,FBgn0014877,FBgn0033074,FBgn0013765,FBgn0034266,FBg…	-|-|-|-|-|-|-|-|-|-|-|-|-|-|-|-|-|-|-|-|-|-|-|-|-|-|-|-|-|-|-|-|-|-|-|-|-|-|-|-|-|-|-|-|-|-|-|-|-|-|-|-|-|-|-|-|-|-|-|-|-|-|-|-|-|-|-|-|-|-|-|-|-|-|-|-|-|-|-|-|-|-|-|-|-|-|-|-|-|-|-|-|-|-|-|-|-|-|-|-|-|-|-|-|-|-|-|-|-|-|-|-|-|-|-|-|
GO:0019829	cation-transporting ATPase activity	molecular_function	0.24583	1	2	366	27	10392	FBgn0010812,FBgn0050109	-|-|
GO:0042625	ATPase activity, coupled to transmembrane movement of ions	molecular_function	0.24583	1	2	366	27	10392	FBgn0010812,FBgn0050109	-|-|
GO:0008175	tRNA methyltransferase activity	molecular_function	0.24584	1	2	366	27	10392	FBgn0037543,FBgn0263144	-|-|
GO:0016462	pyrophosphatase activity	molecular_function	0.24705	1	24	366	586	10392	FBgn0034274,FBgn0033834,FBgn0034493,FBgn0028868,FBgn0032167,FBgn0050109,FBgn0031906,FBgn0002938,FBgn0034496,FBgn0034246,FBgn0014877,FBgn0037551,FBgn0031955,FBgn0051755,FBgn0016701,FBgn0037549,FBgn0036497,FBgn0003545,FBgn0010812,FBgn0000559,FBgn0001138,FBgn0039966,FBgn0262519,FBgn0024556	-|-|-|-|-|-|-|-|-|-|-|-|-|-|-|-|-|-|-|-|-|-|-|-|
GO:0016311	dephosphorylation	biological_process	0.24795	1	3	366	49	10392	FBgn0031952,FBgn0243512,FBgn0029667	-|-|-|
GO:0030117	membrane coat	cellular_component	0.24796	1	4	366	72	10392	FBgn0031905,FBgn0016975,FBgn0016976,FBgn0267727	-|-|-|-|
GO:0048475	coated membrane	cellular_component	0.24796	1	4	366	72	10392	FBgn0031905,FBgn0016975,FBgn0267727,FBgn0016976	-|-|-|-|
GO:0006323	DNA packaging	biological_process	0.24812	1	3	366	49	10392	FBgn0053864,FBgn0053861,FBgn0053858	-|-|-|
GO:0007339	binding of sperm to zona pellucida	biological_process	0.24943	1	1	366	8	10392	FBgn0021764	-|
GO:0008037	cell recognition	biological_process	0.24943	1	1	366	8	10392	FBgn0021764	-|
GO:0009988	cell-cell recognition	biological_process	0.24943	1	1	366	8	10392	FBgn0021764	-|
GO:0035036	sperm-egg recognition	biological_process	0.24943	1	1	366	8	10392	FBgn0021764	-|
GO:0031369	translation initiation factor binding	molecular_function	0.24945	1	1	366	8	10392	FBgn0034258	-|
GO:0008013	beta-catenin binding	molecular_function	0.24946	1	1	366	8	10392	FBgn0034276	-|
GO:0016778	diphosphotransferase activity	molecular_function	0.24946	1	1	366	8	10392	FBgn0261800	-|
GO:0009898	internal side of plasma membrane	cellular_component	0.24947	1	1	366	8	10392	FBgn0050431	-|
GO:0030153	bacteriocin immunity	biological_process	0.24947	1	1	366	8	10392	FBgn0029666	-|
GO:0003997	acyl-CoA oxidase activity	molecular_function	0.24947	1	1	366	8	10392	FBgn0027572	-|
GO:0006635	fatty acid beta-oxidation	biological_process	0.24947	1	1	366	8	10392	FBgn0027572	-|
GO:0019395	fatty acid oxidation	biological_process	0.24947	1	1	366	8	10392	FBgn0027572	-|
GO:0034440	lipid oxidation	biological_process	0.24947	1	1	366	8	10392	FBgn0027572	-|
GO:0008483	transaminase activity	molecular_function	0.24947	1	1	366	8	10392	FBgn0036927	-|
GO:0015886	heme transport	biological_process	0.24947	1	1	366	8	10392	FBgn0001983	-|
GO:1901678	iron coordination entity transport	biological_process	0.24947	1	1	366	8	10392	FBgn0001983	-|
GO:0006944	cellular membrane fusion	biological_process	0.24947	1	1	366	8	10392	FBgn0033834	-|
GO:0031625	ubiquitin protein ligase binding	molecular_function	0.24947	1	1	366	8	10392	FBgn0032956	-|
GO:0044389	small conjugating protein ligase binding	molecular_function	0.24947	1	1	366	8	10392	FBgn0032956	-|
GO:0016458	gene silencing	biological_process	0.24947	1	1	366	8	10392	FBgn0013746	-|
GO:0008417	fucosyltransferase activity	molecular_function	0.24947	1	1	366	8	10392	FBgn0044872	-|
GO:0045229	external encapsulating structure organization	biological_process	0.24947	1	1	366	8	10392	FBgn0020880	-|
GO:0030976	thiamine pyrophosphate binding	molecular_function	0.24947	1	1	366	8	10392	FBgn0034488	-|
GO:0031072	heat shock protein binding	molecular_function	0.24947	1	1	366	8	10392	FBgn0029662	-|
GO:0016703	oxidoreductase activity, acting on single donors with incorporation of molecular oxygen, incorporation of one atom of oxygen (internal monooxygenases or internal mixed function oxidases)	molecular_function	0.24947	1	1	366	8	10392	FBgn0025836	-|
GO:0015078	hydrogen ion transmembrane transporter activity	molecular_function	0.25261	1	10	366	221	10392	FBgn0031941,FBgn0031194,FBgn0010812,FBgn0050109,Novel000234,FBgn0028387,FBgn0261566,FBgn0261507,FBgn0039946,FBgn0034245	-|-|-|-|-|-|-|-|-|-|
GO:0019637	organophosphate metabolic process	biological_process	0.25401	1	18	366	429	10392	FBgn0028387,FBgn0023416,FBgn0031948,FBgn0004852,FBgn0031941,FBgn0266429,FBgn0033844,FBgn0033856,FBgn0034274,FBgn0032172,FBgn0033834,FBgn0053156,FBgn0034270,FBgn0033853,Novel000234,FBgn0043456,FBgn0050109,FBgn0051875	-|-|-|-|-|-|-|-|-|-|-|-|-|-|-|-|-|-|
GO:0009521	photosystem	cellular_component	0.25565	1	4	366	73	10392	FBgn0001138,FBgn0084001,FBgn0052843,FBgn0036496	-|-|-|-|
GO:0042451	purine nucleoside biosynthetic process	biological_process	0.25624	1	5	366	97	10392	FBgn0028387,FBgn0031941,FBgn0050109,Novel000234,FBgn0034274	-|-|-|-|-|
GO:0046129	purine ribonucleoside biosynthetic process	biological_process	0.25624	1	5	366	97	10392	FBgn0028387,FBgn0031941,Novel000234,FBgn0050109,FBgn0034274	-|-|-|-|-|
GO:0032403	protein complex binding	molecular_function	0.25766	1	3	366	50	10392	FBgn0037551,FBgn0036497,FBgn0016701	-|-|-|
GO:0004497	monooxygenase activity	molecular_function	0.25899	1	2	366	28	10392	FBgn0264895,FBgn0025836	-|-|
GO:0005929	cilium	cellular_component	0.25905	1	2	366	28	10392	FBgn0029667,FBgn0036498	-|-|
GO:0031514	motile cilium	cellular_component	0.25905	1	2	366	28	10392	FBgn0029667,FBgn0036498	-|-|
GO:0010340	carboxyl-O-methyltransferase activity	molecular_function	0.25905	1	2	366	28	10392	FBgn0037543,FBgn0263144	-|-|
GO:0051998	protein carboxyl O-methyltransferase activity	molecular_function	0.25905	1	2	366	28	10392	FBgn0037543,FBgn0263144	-|-|
GO:0048856	anatomical structure development	biological_process	0.2631	1	5	366	98	10392	FBgn0039945,Novel000234,FBgn0033074,FBgn0039944,FBgn0265576	-|-|-|-|-|
GO:0015985	energy coupled proton transport, down electrochemical gradient	biological_process	0.26333	1	4	366	74	10392	FBgn0050109,Novel000234,FBgn0031941,FBgn0028387	-|-|-|-|
GO:0015986	ATP synthesis coupled proton transport	biological_process	0.26333	1	4	366	74	10392	FBgn0028387,FBgn0031941,FBgn0050109,Novel000234	-|-|-|-|
GO:0006644	phospholipid metabolic process	biological_process	0.26592	1	6	366	123	10392	FBgn0031948,FBgn0032172,FBgn0034270,FBgn0051875,FBgn0266429,FBgn0033844	-|-|-|-|-|-|
GO:0006812	cation transport	biological_process	0.26599	1	22	366	539	10392	FBgn0033856,FBgn0265835,FBgn0050109,Novel000234,FBgn0051835,FBgn0034246,FBgn0031959,FBgn0029672,FBgn0030617,FBgn0039946,FBgn0000535,FBgn0030610,FBgn0260953,FBgn0028387,FBgn0051693,FBgn0261507,FBgn0267727,FBgn0010812,FBgn0052792,FBgn0039966,FBgn0031941,FBgn0034489	-|-|-|-|-|-|-|-|-|-|-|-|-|-|-|-|-|-|-|-|-|-|
GO:0009247	glycolipid biosynthetic process	biological_process	0.26711	1	3	366	51	10392	FBgn0266429,FBgn0034270,FBgn0032172	-|-|-|
GO:0046467	membrane lipid biosynthetic process	biological_process	0.26711	1	3	366	51	10392	FBgn0266429,FBgn0034270,FBgn0032172	-|-|-|
GO:0016192	vesicle-mediated transport	biological_process	0.27062	1	8	366	174	10392	FBgn0260855,FBgn0040099,FBgn0016976,FBgn0086757,FBgn0031905,FBgn0016975,FBgn0267727,FBgn0034271	-|-|-|-|-|-|-|-|
GO:0008610	lipid biosynthetic process	biological_process	0.27126	1	13	366	303	10392	FBgn0028377,FBgn0266429,FBgn0033844,FBgn0069973,FBgn0032172,FBgn0031948,FBgn0052220,FBgn0034270,FBgn0262866,FBgn0001099,FBgn0032955,FBgn0034276,FBgn0051875	-|-|-|-|-|-|-|-|-|-|-|-|-|
GO:0030674	protein binding, bridging	molecular_function	0.27225	1	2	366	29	10392	FBgn0029664,FBgn0036929	-|-|
GO:0060090	binding, bridging	molecular_function	0.27225	1	2	366	29	10392	FBgn0029664,FBgn0036929	-|-|
GO:0007599	hemostasis	biological_process	0.27226	1	2	366	29	10392	FBgn0036929,FBgn0031959	-|-|
GO:0050817	coagulation	biological_process	0.27226	1	2	366	29	10392	FBgn0036929,FBgn0031959	-|-|
GO:0050878	regulation of body fluid levels	biological_process	0.27226	1	2	366	29	10392	FBgn0036929,FBgn0031959	-|-|
GO:0009405	pathogenesis	biological_process	0.2756	1	8	366	175	10392	FBgn0030613,FBgn0029123,FBgn0040294,FBgn0034494,FBgn0262363,FBgn0032184,Novel000089,FBgn0031912	-|-|-|-|-|-|-|-|
GO:0007338	single fertilization	biological_process	0.27589	1	1	366	9	10392	FBgn0021764	-|
GO:0009566	fertilization	biological_process	0.27589	1	1	366	9	10392	FBgn0021764	-|
GO:0005750	mitochondrial respiratory chain complex III	cellular_component	0.27592	1	1	366	9	10392	FBgn0259683	-|
GO:0006122	mitochondrial electron transport, ubiquinol to cytochrome c	biological_process	0.27592	1	1	366	9	10392	FBgn0259683	-|
GO:0045275	respiratory chain complex III	cellular_component	0.27592	1	1	366	9	10392	FBgn0259683	-|
GO:0000774	adenyl-nucleotide exchange factor activity	molecular_function	0.27592	1	1	366	9	10392	FBgn0014877	-|
GO:0004549	tRNA-specific ribonuclease activity	molecular_function	0.27593	1	1	366	9	10392	FBgn0034249	-|
GO:0051181	cofactor transport	biological_process	0.27593	1	1	366	9	10392	FBgn0001983	-|
GO:0033227	dsRNA transport	biological_process	0.27593	1	1	366	9	10392	FBgn0030617	-|
GO:0051032	nucleic acid transmembrane transporter activity	molecular_function	0.27593	1	1	366	9	10392	FBgn0030617	-|
GO:0051033	RNA transmembrane transporter activity	molecular_function	0.27593	1	1	366	9	10392	FBgn0030617	-|
GO:0015643	toxic substance binding	molecular_function	0.27593	1	1	366	9	10392	FBgn0029666	-|
GO:0016634	oxidoreductase activity, acting on the CH-CH group of donors, oxygen as acceptor	molecular_function	0.27593	1	1	366	9	10392	FBgn0027572	-|
GO:0016769	transferase activity, transferring nitrogenous groups	molecular_function	0.27593	1	1	366	9	10392	FBgn0036927	-|
GO:0031419	cobalamin binding	molecular_function	0.27593	1	1	366	9	10392	FBgn0036497	-|
GO:0000075	cell cycle checkpoint	biological_process	0.27593	1	1	366	9	10392	FBgn0005655	-|
GO:1901988	negative regulation of cell cycle phase transition	biological_process	0.27593	1	1	366	9	10392	FBgn0005655	-|
GO:0019072	viral genome packaging	biological_process	0.27593	1	1	366	9	10392	FBgn0261574	-|
GO:0006570	tyrosine metabolic process	biological_process	0.27593	1	1	366	9	10392	FBgn0005655	-|
GO:0016818	hydrolase activity, acting on acid anhydrides, in phosphorus-containing anhydrides	molecular_function	0.27671	1	24	366	597	10392	FBgn0033834,FBgn0034274,FBgn0032167,FBgn0028868,FBgn0034493,FBgn0034246,FBgn0034496,FBgn0002938,FBgn0031906,FBgn0050109,FBgn0037551,FBgn0031955,FBgn0014877,FBgn0016701,FBgn0051755,FBgn0036497,FBgn0037549,FBgn0039966,FBgn0000559,FBgn0010812,FBgn0001138,FBgn0003545,FBgn0024556,FBgn0262519	-|-|-|-|-|-|-|-|-|-|-|-|-|-|-|-|-|-|-|-|-|-|-|-|
GO:0004930	G-protein coupled receptor activity	molecular_function	0.2774	1	7	366	150	10392	FBgn0266429,FBgn0052843,FBgn0265002,FBgn0037546,FBgn0013765,FBgn0050106,FBgn0036934	-|-|-|-|-|-|-|
GO:0003735	structural constituent of ribosome	molecular_function	0.28351	1	12	366	280	10392	FBgn0030616,FBgn0000546,FBgn0010411,FBgn0031904,FBgn0029123,FBgn0032083,FBgn0011272,FBgn0001983,FBgn0032987,FBgn0030617,FBgn0260964,FBgn0015288	-|-|-|-|-|-|-|-|-|-|-|-|
GO:0005743	mitochondrial inner membrane	cellular_component	0.28404	1	6	366	126	10392	Novel000234,FBgn0050109,FBgn0034274,FBgn0259683,FBgn0028387,FBgn0031941	-|-|-|-|-|-|
GO:0006518	peptide metabolic process	biological_process	0.28536	1	2	366	30	10392	FBgn0025837,FBgn0036924	-|-|
GO:0009975	cyclase activity	molecular_function	0.2854	1	2	366	30	10392	FBgn0023416,FBgn0004852	-|-|
GO:0016893	endonuclease activity, active with either ribo- or deoxyribonucleic acids and producing 5'-phosphomonoesters	molecular_function	0.28544	1	2	366	30	10392	FBgn0034249,FBgn0034246	-|-|
GO:0007005	mitochondrion organization	biological_process	0.28544	1	2	366	30	10392	FBgn0036920,FBgn0033834	-|-|
GO:0009523	photosystem II	cellular_component	0.28647	1	3	366	53	10392	FBgn0036496,FBgn0084001,FBgn0001138	-|-|-|
GO:0005840	ribosome	cellular_component	0.28757	1	12	366	281	10392	FBgn0032083,FBgn0001983,FBgn0011272,FBgn0029123,FBgn0032987,FBgn0260964,FBgn0030617,FBgn0015288,FBgn0030616,FBgn0000546,FBgn0010411,FBgn0031904	-|-|-|-|-|-|-|-|-|-|-|-|
GO:0051716	cellular response to stimulus	biological_process	0.28759	1	45	366	1172	10392	FBgn0003475,FBgn0050106,FBgn0036497,FBgn0259148,FBgn0000180,FBgn0000535,FBgn0031914,FBgn0016701,FBgn0004852,FBgn0262519,FBgn0036926,FBgn0036934,FBgn0036494,FBgn0036932,FBgn0025836,FBgn0039966,FBgn0011584,FBgn0266429,FBgn0004009,FBgn0013303,FBgn0029664,FBgn0031902,FBgn0033853,FBgn0261571,FBgn0034276,FBgn0023416,FBgn0036929,FBgn0264449,FBgn0020880,FBgn0003448,FBgn0264895,FBgn0027343,FBgn0024556,FBg…	-|-|-|-|-|-|-|-|-|-|-|-|-|-|-|-|-|-|-|-|-|-|-|-|-|-|-|-|-|-|-|-|-|-|-|-|-|-|-|-|-|-|-|-|-|
GO:0006605	protein targeting	biological_process	0.29034	1	5	366	102	10392	FBgn0267727,FBgn0036920,FBgn0036928,FBgn0086757,FBgn0031194	-|-|-|-|-|
GO:0006412	translation	biological_process	0.29118	1	17	366	414	10392	FBgn0032987,FBgn0032168,FBgn0015288,FBgn0030617,FBgn0031904,FBgn0001138,FBgn0010411,FBgn0029123,FBgn0011272,FBgn0032083,FBgn0001983,FBgn0260964,FBgn0000546,FBgn0034258,FBgn0029664,FBgn0030616,FBgn0034249	-|-|-|-|-|-|-|-|-|-|-|-|-|-|-|-|-|
GO:0006814	sodium ion transport	biological_process	0.29501	1	4	366	78	10392	FBgn0034489,FBgn0051693,FBgn0052792,FBgn0029672	-|-|-|-|
GO:0016651	oxidoreductase activity, acting on NAD(P)H	molecular_function	0.29509	1	4	366	78	10392	FBgn0034251,Novel000234,Novel000089,FBgn0030605	-|-|-|-|
GO:0043234	protein complex	cellular_component	0.2969	1	46	366	1204	10392	FBgn0053870,FBgn0030614,FBgn0034274,FBgn0036496,FBgn0027600,FBgn0036928,FBgn0005655,FBgn0053872,FBgn0053869,FBgn0052843,FBgn0084001,FBgn0050109,FBgn0034265,FBgn0259683,FBgn0030612,FBgn0039946,FBgn0036929,FBgn0036918,FBgn0261507,FBgn0053868,FBgn0034503,FBgn0003016,FBgn0028387,FBgn0016975,FBgn0001138,FBgn0010812,FBgn0036924,FBgn0266429,FBgn0002938,FBgn0026136,FBgn0034271,Novel000234,FBgn0034258,FBg…	-|-|-|-|-|-|-|-|-|-|-|-|-|-|-|-|-|-|-|-|-|-|-|-|-|-|-|-|-|-|-|-|-|-|-|-|-|-|-|-|-|-|-|-|-|-|
GO:0007186	G-protein coupled receptor signaling pathway	biological_process	0.29709	1	10	366	231	10392	FBgn0261571,FBgn0052843,FBgn0037551,FBgn0037546,FBgn0036934,FBgn0033853,FBgn0266429,FBgn0016701,FBgn0050106,FBgn0036497	-|-|-|-|-|-|-|-|-|-|
GO:1901605	alpha-amino acid metabolic process	biological_process	0.29718	1	5	366	103	10392	FBgn0025687,FBgn0261800,FBgn0034276,FBgn0030612,FBgn0005655	-|-|-|-|-|
GO:0071495	cellular response to endogenous stimulus	biological_process	0.29846	1	2	366	31	10392	FBgn0036932,FBgn0000546	-|-|
GO:0016709	oxidoreductase activity, acting on paired donors, with incorporation or reduction of molecular oxygen, NAD(P)H as one donor, and incorporation of one atom of oxygen	molecular_function	0.30142	1	1	366	10	10392	FBgn0264895	-|
GO:0042710	biofilm formation	biological_process	0.30143	1	1	366	10	10392	FBgn0033072	-|
GO:0008158	hedgehog receptor activity	molecular_function	0.30144	1	1	366	10	10392	FBgn0262867	-|
GO:0008272	sulfate transport	biological_process	0.30145	1	1	366	10	10392	FBgn0034275	-|
GO:0015116	sulfate transmembrane transporter activity	molecular_function	0.30145	1	1	366	10	10392	FBgn0034275	-|
GO:0006013	mannose metabolic process	biological_process	0.30146	1	1	366	10	10392	FBgn0034271	-|
GO:0035251	UDP-glucosyltransferase activity	molecular_function	0.30146	1	1	366	10	10392	FBgn0259683	-|
GO:0046527	glucosyltransferase activity	molecular_function	0.30146	1	1	366	10	10392	FBgn0259683	-|
GO:0019888	protein phosphatase regulator activity	molecular_function	0.30146	1	1	366	10	10392	FBgn0003448	-|
GO:0006626	protein targeting to mitochondrion	biological_process	0.30146	1	1	366	10	10392	FBgn0036920	-|
GO:0070585	protein localization to mitochondrion	biological_process	0.30146	1	1	366	10	10392	FBgn0036920	-|
GO:0072655	establishment of protein localization to mitochondrion	biological_process	0.30146	1	1	366	10	10392	FBgn0036920	-|
GO:0009163	nucleoside biosynthetic process	biological_process	0.30399	1	5	366	104	10392	FBgn0050109,Novel000234,FBgn0034274,FBgn0028387,FBgn0031941	-|-|-|-|-|
GO:0042455	ribonucleoside biosynthetic process	biological_process	0.30399	1	5	366	104	10392	FBgn0028387,FBgn0031941,FBgn0050109,Novel000234,FBgn0034274	-|-|-|-|-|
GO:0008200	ion channel inhibitor activity	molecular_function	0.30589	1	3	366	55	10392	FBgn0040294,FBgn0262363,FBgn0030613	-|-|-|
GO:0016248	channel inhibitor activity	molecular_function	0.30589	1	3	366	55	10392	FBgn0040294,FBgn0262363,FBgn0030613	-|-|-|
GO:0019067	viral assembly, maturation, egress, and release	biological_process	0.30595	1	3	366	55	10392	FBgn0031910,FBgn0004638,FBgn0261574	-|-|-|
GO:0044427	chromosomal part	cellular_component	0.30857	1	6	366	130	10392	FBgn0037539,FBgn0005655,FBgn0053858,FBgn0029531,FBgn0053861,FBgn0053864	-|-|-|-|-|-|
GO:1901659	glycosyl compound biosynthetic process	biological_process	0.31093	1	5	366	105	10392	Novel000234,FBgn0050109,FBgn0034274,FBgn0028387,FBgn0031941	-|-|-|-|-|
GO:0008138	protein tyrosine/serine/threonine phosphatase activity	molecular_function	0.31156	1	2	366	32	10392	FBgn0031952,FBgn0243512	-|-|
GO:0071310	cellular response to organic substance	biological_process	0.3116	1	2	366	32	10392	FBgn0036932,FBgn0000546	-|-|
GO:0006790	sulfur compound metabolic process	biological_process	0.31568	1	3	366	56	10392	FBgn0036915,FBgn0025837,FBgn0032981	-|-|-|
GO:0006629	lipid metabolic process	biological_process	0.31576	1	22	366	556	10392	FBgn0032955,FBgn0032973,FBgn0262866,FBgn0001099,FBgn0030607,FBgn0031948,FBgn0028377,FBgn0069973,FBgn0027581,FBgn0034276,FBgn0266489,FBgn0051875,FBgn0028370,FBgn0013765,FBgn0032981,FBgn0032172,FBgn0034270,FBgn0052220,FBgn0266429,FBgn0033844,FBgn0027572,FBgn0034491	-|-|-|-|-|-|-|-|-|-|-|-|-|-|-|-|-|-|-|-|-|-|
GO:0009451	RNA modification	biological_process	0.31794	1	5	366	106	10392	FBgn0028868,FBgn0037543,FBgn0263774,FBgn0263144,FBgn0043456	-|-|-|-|-|
GO:0032502	developmental process	biological_process	0.32149	1	9	366	210	10392	FBgn0031902,FBgn0039944,FBgn0265576,FBgn0033074,FBgn0039945,Novel000234,FBgn0030600,FBgn0004009,FBgn0031903	-|-|-|-|-|-|-|-|-|
GO:0019898	extrinsic to membrane	cellular_component	0.32479	1	2	366	33	10392	FBgn0001138,FBgn0031196	-|-|
GO:0009190	cyclic nucleotide biosynthetic process	biological_process	0.3248	1	2	366	33	10392	FBgn0004852,FBgn0023416	-|-|
GO:0004519	endonuclease activity	molecular_function	0.32534	1	3	366	57	10392	FBgn0004638,FBgn0034249,FBgn0034246	-|-|-|
GO:0005921	gap junction	cellular_component	0.32593	1	1	366	11	10392	FBgn0263774	-|
GO:0007205	protein kinase C-activating G-protein coupled receptor signaling pathway	biological_process	0.32599	1	1	366	11	10392	FBgn0033853	-|
GO:0005227	calcium activated cation channel activity	molecular_function	0.32599	1	1	366	11	10392	FBgn0034246	-|
GO:0015269	calcium-activated potassium channel activity	molecular_function	0.32599	1	1	366	11	10392	FBgn0034246	-|
GO:0006824	cobalt ion transport	biological_process	0.32602	1	1	366	11	10392	FBgn0265835	-|
GO:0015087	cobalt ion transmembrane transporter activity	molecular_function	0.32602	1	1	366	11	10392	FBgn0265835	-|
GO:0006749	glutathione metabolic process	biological_process	0.32608	1	1	366	11	10392	FBgn0025837	-|
GO:0043934	sporulation	biological_process	0.32608	1	1	366	11	10392	FBgn0033074	-|
GO:0000049	tRNA binding	molecular_function	0.32608	1	1	366	11	10392	FBgn0034249	-|
GO:1901682	sulfur compound transmembrane transporter activity	molecular_function	0.32608	1	1	366	11	10392	FBgn0034275	-|
GO:0009062	fatty acid catabolic process	biological_process	0.32609	1	1	366	11	10392	FBgn0027572	-|
GO:0072329	monocarboxylic acid catabolic process	biological_process	0.32609	1	1	366	11	10392	FBgn0027572	-|
GO:0010948	negative regulation of cell cycle process	biological_process	0.32609	1	1	366	11	10392	FBgn0005655	-|
GO:0044183	protein binding involved in protein folding	molecular_function	0.32609	1	1	366	11	10392	FBgn0031905	-|
GO:0000145	exocyst	cellular_component	0.32609	1	1	366	11	10392	FBgn0034271	-|
GO:0046933	proton-transporting ATP synthase activity, rotational mechanism	molecular_function	0.32609	1	1	366	11	10392	FBgn0050109	-|
GO:0034357	photosynthetic membrane	cellular_component	0.3271	1	4	366	82	10392	FBgn0036496,FBgn0052843,FBgn0001138,FBgn0084001	-|-|-|-|
GO:0009058	biosynthetic process	biological_process	0.32944	1	95	366	2583	10392	FBgn0000535,FBgn0031948,FBgn0032184,Novel000089,FBgn0051702,FBgn0262519,FBgn0001099,FBgn0034488,FBgn0002524,FBgn0031941,FBgn0044872,FBgn0261800,FBgn0052220,FBgn0040099,FBgn0037539,FBgn0001983,FBgn0031907,FBgn0029123,FBgn0025616,FBgn0029657,FBgn0034276,FBgn0031957,FBgn0032981,FBgn0031905,FBgn0034258,FBgn0031196,FBgn0034277,FBgn0033853,FBgn0033855,FBgn0030612,Novel000042,FBgn0032168,FBgn0003016,FBg…	-|-|-|-|-|-|-|-|-|-|-|-|-|-|-|-|-|-|-|-|-|-|-|-|-|-|-|-|-|-|-|-|-|-|-|-|-|-|-|-|-|-|-|-|-|-|-|-|-|-|-|-|-|-|-|-|-|-|-|-|-|-|-|-|-|-|-|-|-|-|-|-|-|-|-|-|-|-|-|-|-|-|-|-|-|-|-|-|-|-|-|-|-|-|-|
GO:0008168	methyltransferase activity	molecular_function	0.33295	1	8	366	186	10392	FBgn0032168,FBgn0037543,FBgn0085224,FBgn0034269,FBgn0034276,FBgn0033072,FBgn0034246,FBgn0263144	-|-|-|-|-|-|-|-|
GO:0019866	organelle inner membrane	cellular_component	0.33362	1	6	366	134	10392	FBgn0259683,FBgn0028387,FBgn0031941,Novel000234,FBgn0050109,FBgn0034274	-|-|-|-|-|-|
GO:0000276	mitochondrial proton-transporting ATP synthase complex, coupling factor F(o)	cellular_component	0.33491	1	3	366	58	10392	FBgn0028387,FBgn0031941,Novel000234	-|-|-|
GO:0031461	cullin-RING ubiquitin ligase complex	cellular_component	0.33519	1	4	366	83	10392	FBgn0259148,Novel000089,FBgn0036494,FBgn0032956	-|-|-|-|
GO:0009725	response to hormone stimulus	biological_process	0.3377	1	2	366	34	10392	FBgn0030600,FBgn0000546	-|-|
GO:0044272	sulfur compound biosynthetic process	biological_process	0.33787	1	2	366	34	10392	FBgn0036915,FBgn0032981	-|-|
GO:0008324	cation transmembrane transporter activity	molecular_function	0.33954	1	23	366	591	10392	FBgn0031959,FBgn0266489,FBgn0034246,Novel000234,FBgn0050109,FBgn0029663,FBgn0265835,FBgn0034245,FBgn0031194,FBgn0034489,FBgn0031941,FBgn0039966,FBgn0052792,FBgn0010812,FBgn0001138,FBgn0027581,FBgn0261507,FBgn0261566,FBgn0028387,FBgn0039946,FBgn0000535,FBgn0030617,FBgn0029672	-|-|-|-|-|-|-|-|-|-|-|-|-|-|-|-|-|-|-|-|-|-|-|
GO:0016491	oxidoreductase activity	molecular_function	0.33994	1	35	366	920	10392	FBgn0033830,FBgn0030605,FBgn0030616,FBgn0034245,FBgn0033856,FBgn0027572,FBgn0263830,FBgn0005655,FBgn0029006,FBgn0030615,FBgn0025687,FBgn0032955,FBgn0027343,FBgn0034251,FBgn0264895,FBgn0261566,FBgn0034276,FBgn0034487,FBgn0034246,FBgn0043456,Novel000234,FBgn0028892,FBgn0034258,FBgn0033065,FBgn0029662,FBgn0025836,FBgn0000056,Novel000089,FBgn0031194,FBgn0000565,FBgn0034488,FBgn0027529,FBgn0034500,FBg…	-|-|-|-|-|-|-|-|-|-|-|-|-|-|-|-|-|-|-|-|-|-|-|-|-|-|-|-|-|-|-|-|-|-|-|
GO:0008033	tRNA processing	biological_process	0.34636	1	6	366	136	10392	FBgn0261802,FBgn0263144,FBgn0034276,FBgn0037543,FBgn0034249,FBgn0028868	-|-|-|-|-|-|
GO:0005911	cell-cell junction	cellular_component	0.3497	1	1	366	12	10392	FBgn0263774	-|
GO:0009654	oxygen evolving complex	cellular_component	0.34975	1	1	366	12	10392	FBgn0001138	-|
GO:0008374	O-acyltransferase activity	molecular_function	0.34983	1	1	366	12	10392	FBgn0013765	-|
GO:0006772	thiamine metabolic process	biological_process	0.34984	1	1	366	12	10392	FBgn0036915	-|
GO:0009228	thiamine biosynthetic process	biological_process	0.34984	1	1	366	12	10392	FBgn0036915	-|
GO:0042723	thiamine-containing compound metabolic process	biological_process	0.34984	1	1	366	12	10392	FBgn0036915	-|
GO:0042724	thiamine-containing compound biosynthetic process	biological_process	0.34984	1	1	366	12	10392	FBgn0036915	-|
GO:0072348	sulfur compound transport	biological_process	0.34985	1	1	366	12	10392	FBgn0034275	-|
GO:0044242	cellular lipid catabolic process	biological_process	0.34985	1	1	366	12	10392	FBgn0027572	-|
GO:0005310	dicarboxylic acid transmembrane transporter activity	molecular_function	0.34985	1	1	366	12	10392	FBgn0036928	-|
GO:0051539	4 iron, 4 sulfur cluster binding	molecular_function	0.34986	1	1	366	12	10392	FBgn0034251	-|
GO:0005342	organic acid transmembrane transporter activity	molecular_function	0.35075	1	2	366	35	10392	FBgn0036928,FBgn0032988	-|-|
GO:0046943	carboxylic acid transmembrane transporter activity	molecular_function	0.35075	1	2	366	35	10392	FBgn0032988,FBgn0036928	-|-|
GO:0009187	cyclic nucleotide metabolic process	biological_process	0.35076	1	2	366	35	10392	FBgn0004852,FBgn0023416	-|-|
GO:0005543	phospholipid binding	molecular_function	0.35082	1	2	366	35	10392	FBgn0034265,FBgn0033075	-|-|
GO:0015988	energy coupled proton transmembrane transport, against electrochemical gradient	biological_process	0.35136	1	4	366	85	10392	FBgn0039946,FBgn0010812,FBgn0267727,FBgn0261507	-|-|-|-|
GO:0015991	ATP hydrolysis coupled proton transport	biological_process	0.35136	1	4	366	85	10392	FBgn0267727,FBgn0010812,FBgn0039946,FBgn0261507	-|-|-|-|
GO:0051276	chromosome organization	biological_process	0.35259	1	6	366	137	10392	FBgn0053858,FBgn0051702,FBgn0030613,FBgn0053861,FBgn0051703,FBgn0053864	-|-|-|-|-|-|
GO:0006400	tRNA modification	biological_process	0.3546	1	3	366	60	10392	FBgn0037543,FBgn0028868,FBgn0263144	-|-|-|
GO:0008026	ATP-dependent helicase activity	molecular_function	0.35938	1	4	366	86	10392	FBgn0034246,FBgn0034496,FBgn0051755,FBgn0037549	-|-|-|-|
GO:0070035	purine NTP-dependent helicase activity	molecular_function	0.35938	1	4	366	86	10392	FBgn0037549,FBgn0034496,FBgn0034246,FBgn0051755	-|-|-|-|
GO:1901576	organic substance biosynthetic process	biological_process	0.36195	1	91	366	2491	10392	FBgn0263994,FBgn0036915,FBgn0032955,FBgn0001138,Novel000211,FBgn0023416,FBgn0036916,FBgn0028387,FBgn0053871,FBgn0031908,FBgn0030617,FBgn0259683,FBgn0034249,FBgn0028868,FBgn0005655,FBgn0053872,FBgn0053869,FBgn0032083,FBgn0022740,FBgn0034270,FBgn0034274,FBgn0032172,FBgn0086368,FBgn0260964,FBgn0262866,FBgn0031904,FBgn0010411,FBgn0032987,FBgn0030613,FBgn0027581,FBgn0014037,FBgn0015288,FBgn0004852,FBg…	-|-|-|-|-|-|-|-|-|-|-|-|-|-|-|-|-|-|-|-|-|-|-|-|-|-|-|-|-|-|-|-|-|-|-|-|-|-|-|-|-|-|-|-|-|-|-|-|-|-|-|-|-|-|-|-|-|-|-|-|-|-|-|-|-|-|-|-|-|-|-|-|-|-|-|-|-|-|-|-|-|-|-|-|-|-|-|-|-|-|-|
GO:0009117	nucleotide metabolic process	biological_process	0.36285	1	11	366	272	10392	Novel000234,FBgn0043456,FBgn0050109,FBgn0033853,FBgn0031941,FBgn0034274,FBgn0033834,FBgn0053156,FBgn0004852,FBgn0023416,FBgn0028387	-|-|-|-|-|-|-|-|-|-|-|
GO:0070887	cellular response to chemical stimulus	biological_process	0.3635	1	2	366	36	10392	FBgn0036932,FBgn0000546	-|-|
GO:0008171	O-methyltransferase activity	molecular_function	0.36368	1	2	366	36	10392	FBgn0037543,FBgn0263144	-|-|
GO:0016247	channel regulator activity	molecular_function	0.36421	1	3	366	61	10392	FBgn0040294,FBgn0030613,FBgn0262363	-|-|-|
GO:0006461	protein complex assembly	biological_process	0.36713	1	5	366	113	10392	FBgn0001983,FBgn0036929,FBgn0043456,FBgn0004228,FBgn0030614	-|-|-|-|-|
GO:0070271	protein complex biogenesis	biological_process	0.36713	1	5	366	113	10392	FBgn0001983,FBgn0036929,FBgn0043456,FBgn0030614,FBgn0004228	-|-|-|-|-|
GO:0055114	oxidation-reduction process	biological_process	0.36964	1	32	366	849	10392	FBgn0259683,FBgn0030616,FBgn0033830,FBgn0027572,FBgn0034491,FBgn0005655,FBgn0263830,FBgn0033856,FBgn0027343,FBgn0030615,FBgn0029006,FBgn0032955,FBgn0025687,FBgn0261566,FBgn0264895,FBgn0034251,FBgn0034258,FBgn0033065,FBgn0034246,FBgn0051875,FBgn0034487,FBgn0034276,FBgn0028892,Novel000234,FBgn0043456,FBgn0000565,FBgn0031194,FBgn0034488,FBgn0025836,Novel000089,FBgn0027529,FBgn0069973	-|-|-|-|-|-|-|-|-|-|-|-|-|-|-|-|-|-|-|-|-|-|-|-|-|-|-|-|-|-|-|-|
GO:0044249	cellular biosynthetic process	biological_process	0.37049	1	89	366	2440	10392	FBgn0030616,FBgn0037546,FBgn0034265,FBgn0000546,FBgn0050109,FBgn0053121,FBgn0011272,FBgn0029531,FBgn0033844,FBgn0053870,FBgn0021764,Novel000040,FBgn0025687,FBgn0051703,FBgn0032168,FBgn0003016,FBgn0030600,FBgn0053868,FBgn0034503,FBgn0033855,FBgn0030612,Novel000042,FBgn0032981,FBgn0031905,FBgn0034277,FBgn0031196,FBgn0034258,FBgn0033853,FBgn0034276,FBgn0037539,FBgn0001983,FBgn0031907,FBgn0029123,FBg…	-|-|-|-|-|-|-|-|-|-|-|-|-|-|-|-|-|-|-|-|-|-|-|-|-|-|-|-|-|-|-|-|-|-|-|-|-|-|-|-|-|-|-|-|-|-|-|-|-|-|-|-|-|-|-|-|-|-|-|-|-|-|-|-|-|-|-|-|-|-|-|-|-|-|-|-|-|-|-|-|-|-|-|-|-|-|-|-|-|
GO:0019904	protein domain specific binding	molecular_function	0.37277	1	1	366	13	10392	FBgn0029664	-|
GO:0003993	acid phosphatase activity	molecular_function	0.37278	1	1	366	13	10392	FBgn0027279	-|
GO:0019208	phosphatase regulator activity	molecular_function	0.37278	1	1	366	13	10392	FBgn0003448	-|
GO:0008677	2-dehydropantoate 2-reductase activity	molecular_function	0.37278	1	1	366	13	10392	FBgn0043456	-|
GO:0045263	proton-transporting ATP synthase complex, coupling factor F(o)	cellular_component	0.37372	1	3	366	62	10392	FBgn0028387,FBgn0031941,Novel000234	-|-|-|
GO:0042592	homeostatic process	biological_process	0.37409	1	5	366	114	10392	FBgn0029662,FBgn0001138,FBgn0036932,FBgn0266489,FBgn0027581	-|-|-|-|-|
GO:0005507	copper ion binding	molecular_function	0.37633	1	2	366	37	10392	FBgn0030610,FBgn0037546	-|-|
GO:0015698	inorganic anion transport	biological_process	0.37642	1	2	366	37	10392	FBgn0051693,FBgn0034275	-|-|
GO:0016747	transferase activity, transferring acyl groups other than amino-acyl groups	molecular_function	0.37797	1	6	366	141	10392	FBgn0260006,FBgn0025835,FBgn0028387,FBgn0033065,FBgn0034489,FBgn0013765	-|-|-|-|-|-|
GO:0016791	phosphatase activity	molecular_function	0.38347	1	4	366	89	10392	FBgn0027279,FBgn0029667,FBgn0031952,FBgn0243512	-|-|-|-|
GO:0030001	metal ion transport	biological_process	0.38355	1	13	366	331	10392	FBgn0265835,FBgn0033856,FBgn0029672,FBgn0030617,FBgn0030610,FBgn0051693,FBgn0260953,FBgn0052792,FBgn0051835,FBgn0034246,FBgn0039966,FBgn0031959,FBgn0034489	-|-|-|-|-|-|-|-|-|-|-|-|-|
GO:0070085	glycosylation	biological_process	0.38356	1	4	366	89	10392	FBgn0259683,FBgn0034277,FBgn0044872,FBgn0086368	-|-|-|-|
GO:0006996	organelle organization	biological_process	0.38501	1	15	366	386	10392	FBgn0052791,FBgn0053858,FBgn0085569,FBgn0030613,FBgn0266429,FBgn0051619,FBgn0033834,FBgn0031187,FBgn0053864,FBgn0004228,FBgn0051702,FBgn0053861,FBgn0036920,FBgn0051703,FBgn0036932	-|-|-|-|-|-|-|-|-|-|-|-|-|-|-|
GO:0016879	ligase activity, forming carbon-nitrogen bonds	molecular_function	0.38647	1	8	366	196	10392	FBgn0037547,Novel000089,FBgn0261802,FBgn0037548,FBgn0029006,FBgn0036494,FBgn0032974,FBgn0034483	-|-|-|-|-|-|-|-|
GO:0006397	mRNA processing	biological_process	0.38805	1	5	366	116	10392	FBgn0052791,FBgn0030600,FBgn0033859,FBgn0003559,FBgn0001138	-|-|-|-|-|
GO:0048870	cell motility	biological_process	0.38908	1	2	366	38	10392	FBgn0036498,FBgn0029667	-|-|
GO:0051674	localization of cell	biological_process	0.38908	1	2	366	38	10392	FBgn0036498,FBgn0029667	-|-|
GO:0071103	DNA conformation change	biological_process	0.39322	1	3	366	64	10392	FBgn0053861,FBgn0053864,FBgn0053858	-|-|-|
GO:0005634	nucleus	cellular_component	0.39398	1	51	366	1388	10392	FBgn0053870,FBgn0022740,FBgn0053872,FBgn0053869,FBgn0005655,FBgn0029531,FBgn0053861,FBgn0037546,FBgn0037551,FBgn0034265,FBgn0000546,FBgn0025674,FBgn0033855,FBgn0053871,FBgn0028387,FBgn0003016,FBgn0034503,FBgn0053868,FBgn0050431,FBgn0030600,FBgn0085450,FBgn0001138,FBgn0051703,FBgn0263994,FBgn0053864,FBgn0053156,FBgn0052220,FBgn0037539,FBgn0015799,FBgn0039941,FBgn0031196,FBgn0053873,FBgn0259148,FBg…	-|-|-|-|-|-|-|-|-|-|-|-|-|-|-|-|-|-|-|-|-|-|-|-|-|-|-|-|-|-|-|-|-|-|-|-|-|-|-|-|-|-|-|-|-|-|-|-|-|-|-|
GO:0004143	diacylglycerol kinase activity	molecular_function	0.39471	1	1	366	14	10392	FBgn0033853	-|
GO:0008982	protein-N(PI)-phosphohistidine-sugar phosphotransferase activity	molecular_function	0.39476	1	1	366	14	10392	FBgn0039946	-|
GO:0009982	pseudouridine synthase activity	molecular_function	0.39489	1	1	366	14	10392	FBgn0043456	-|
GO:0009791	post-embryonic development	biological_process	0.39489	1	1	366	14	10392	FBgn0265576	-|
GO:0009878	nodule morphogenesis	biological_process	0.39489	1	1	366	14	10392	FBgn0265576	-|
GO:0009886	post-embryonic morphogenesis	biological_process	0.39489	1	1	366	14	10392	FBgn0265576	-|
GO:0044111	development involved in symbiotic interaction	biological_process	0.39489	1	1	366	14	10392	FBgn0265576	-|
GO:0017004	cytochrome complex assembly	biological_process	0.3949	1	1	366	14	10392	FBgn0001983	-|
GO:0008855	exodeoxyribonuclease VII activity	molecular_function	0.3949	1	1	366	14	10392	FBgn0029123	-|
GO:0000179	rRNA (adenine-N6,N6-)-dimethyltransferase activity	molecular_function	0.39491	1	1	366	14	10392	FBgn0263144	-|
GO:0008565	protein transporter activity	molecular_function	0.40161	1	2	366	39	10392	FBgn0267727,FBgn0011584	-|-|
GO:0042995	cell projection	cellular_component	0.40162	1	2	366	39	10392	FBgn0029667,FBgn0036498	-|-|
GO:0008170	N-methyltransferase activity	molecular_function	0.40163	1	2	366	39	10392	FBgn0037543,FBgn0263144	-|-|
GO:0033177	proton-transporting two-sector ATPase complex, proton-transporting domain	cellular_component	0.40221	1	5	366	118	10392	FBgn0031941,FBgn0261507,FBgn0028387,Novel000234,FBgn0039946	-|-|-|-|-|
GO:0009150	purine ribonucleotide metabolic process	biological_process	0.40254	1	8	366	199	10392	FBgn0004852,FBgn0033834,FBgn0034274,FBgn0023416,FBgn0028387,FBgn0050109,Novel000234,FBgn0031941	-|-|-|-|-|-|-|-|
GO:0042157	lipoprotein metabolic process	biological_process	0.40257	1	3	366	65	10392	FBgn0266429,FBgn0032172,FBgn0034270	-|-|-|
GO:0051287	NAD binding	molecular_function	0.40276	1	3	366	65	10392	FBgn0033856,FBgn0025687,FBgn0043456	-|-|-|
GO:0043228	non-membrane-bounded organelle	cellular_component	0.40387	1	22	366	585	10392	FBgn0053861,FBgn0002938,FBgn0030616,FBgn0000546,FBgn0260964,FBgn0053864,FBgn0030614,FBgn0029123,FBgn0005655,FBgn0001983,FBgn0037539,FBgn0032083,FBgn0011272,FBgn0029531,FBgn0010411,FBgn0031904,FBgn0030617,FBgn0264449,FBgn0015288,FBgn0004228,FBgn0053858,FBgn0032987	-|-|-|-|-|-|-|-|-|-|-|-|-|-|-|-|-|-|-|-|-|-|
GO:0043232	intracellular non-membrane-bounded organelle	cellular_component	0.40387	1	22	366	585	10392	FBgn0030617,FBgn0264449,FBgn0015288,FBgn0004228,FBgn0053858,FBgn0032987,FBgn0010411,FBgn0031904,FBgn0260964,FBgn0053864,FBgn0030614,FBgn0029123,FBgn0005655,FBgn0037539,FBgn0011272,FBgn0001983,FBgn0032083,FBgn0029531,FBgn0053861,FBgn0002938,FBgn0030616,FBgn0000546	-|-|-|-|-|-|-|-|-|-|-|-|-|-|-|-|-|-|-|-|-|-|
GO:0016741	transferase activity, transferring one-carbon groups	molecular_function	0.40808	1	8	366	200	10392	FBgn0085224,FBgn0034269,FBgn0032168,FBgn0037543,FBgn0034246,FBgn0263144,FBgn0033072,FBgn0034276	-|-|-|-|-|-|-|-|
GO:0032501	multicellular organismal process	biological_process	0.40831	1	15	366	392	10392	FBgn0041247,Novel000089,FBgn0039945,FBgn0069938,FBgn0045495,FBgn0265576,FBgn0031902,FBgn0039944,FBgn0037546,FBgn0021764,FBgn0031959,FBgn0004009,FBgn0031903,FBgn0036929,FBgn0030600	-|-|-|-|-|-|-|-|-|-|-|-|-|-|-|
GO:0009987	cellular process	biological_process	0.40916	1	204	366	5717	10392	FBgn0031902,FBgn0053873,FBgn0031910,FBgn0029664,FBgn0051875,FBgn0011584,FBgn0003559,FBgn0260764,FBgn0033072,FBgn0025836,FBgn0265767,FBgn0267727,FBgn0027581,FBgn0036497,FBgn0030613,FBgn0053858,FBgn0014037,FBgn0261574,FBgn0004852,FBgn0015288,FBgn0034500,FBgn0034249,FBgn0037551,FBgn0028868,FBgn0053869,FBgn0037543,FBgn0033834,FBgn0051619,FBgn0031903,FBgn0260964,FBgn0086368,FBgn0263994,FBgn0013746,FBg…	-|-|-|-|-|-|-|-|-|-|-|-|-|-|-|-|-|-|-|-|-|-|-|-|-|-|-|-|-|-|-|-|-|-|-|-|-|-|-|-|-|-|-|-|-|-|-|-|-|-|-|-|-|-|-|-|-|-|-|-|-|-|-|-|-|-|-|-|-|-|-|-|-|-|-|-|-|-|-|-|-|-|-|-|-|-|-|-|-|-|-|-|-|-|-|-|-|-|-|-|-|-|-|-|-|-|-|-|-|-|-|-|-|-|-|-|-|-|-|-|-|-|-|-|-|-|-|-
GO:0006396	RNA processing	biological_process	0.41264	1	13	366	338	10392	FBgn0034276,FBgn0033072,FBgn0034246,FBgn0263144,FBgn0001138,FBgn0261802,FBgn0034249,FBgn0003559,FBgn0028868,FBgn0033859,FBgn0037543,FBgn0030600,FBgn0052791	-|-|-|-|-|-|-|-|-|-|-|-|-|
GO:0016849	phosphorus-oxygen lyase activity	molecular_function	0.41398	1	2	366	40	10392	FBgn0023416,FBgn0004852	-|-|
GO:0015081	sodium ion transmembrane transporter activity	molecular_function	0.41554	1	4	366	93	10392	FBgn0029663,FBgn0034489,FBgn0029672,FBgn0052792	-|-|-|-|
GO:0000151	ubiquitin ligase complex	cellular_component	0.41561	1	4	366	93	10392	FBgn0259148,Novel000089,FBgn0036494,FBgn0032956	-|-|-|-|
GO:0043648	dicarboxylic acid metabolic process	biological_process	0.41622	1	1	366	15	10392	FBgn0025687	-|
GO:0015923	mannosidase activity	molecular_function	0.41623	1	1	366	15	10392	FBgn0034271	-|
GO:0009061	anaerobic respiration	biological_process	0.41624	1	1	366	15	10392	FBgn0034488	-|
GO:0015948	methanogenesis	biological_process	0.41624	1	1	366	15	10392	FBgn0034488	-|
GO:0015975	energy derivation by oxidation of reduced inorganic compounds	biological_process	0.41624	1	1	366	15	10392	FBgn0034488	-|
GO:0043447	alkane biosynthetic process	biological_process	0.41624	1	1	366	15	10392	FBgn0034488	-|
GO:0007031	peroxisome organization	biological_process	0.41624	1	1	366	15	10392	FBgn0085569	-|
GO:0005874	microtubule	cellular_component	0.41624	1	1	366	15	10392	FBgn0030614	-|
GO:0004529	exodeoxyribonuclease activity	molecular_function	0.41624	1	1	366	15	10392	FBgn0029123	-|
GO:0016895	exodeoxyribonuclease activity, producing 5'-phosphomonoesters	molecular_function	0.41624	1	1	366	15	10392	FBgn0029123	-|
GO:0006904	vesicle docking involved in exocytosis	biological_process	0.41625	1	1	366	15	10392	FBgn0034271	-|
GO:0006835	dicarboxylic acid transport	biological_process	0.41625	1	1	366	15	10392	FBgn0036928	-|
GO:0006163	purine nucleotide metabolic process	biological_process	0.42411	1	8	366	203	10392	FBgn0031941,Novel000234,FBgn0050109,FBgn0028387,FBgn0023416,FBgn0004852,FBgn0033834,FBgn0034274	-|-|-|-|-|-|-|-|
GO:0016042	lipid catabolic process	biological_process	0.42581	1	2	366	41	10392	FBgn0027572,FBgn0034491	-|-|
GO:0019079	viral genome replication	biological_process	0.42629	1	2	366	41	10392	FBgn0028868,FBgn0260764	-|-|
GO:0031974	membrane-enclosed lumen	cellular_component	0.4264	1	14	366	369	10392	FBgn0034259,FBgn0053872,FBgn0053869,FBgn0003016,FBgn0053868,FBgn0034503,FBgn0005655,FBgn0014037,FBgn0053870,FBgn0030610,FBgn0034489,FBgn0034265,FBgn0033065,FBgn0032184	-|-|-|-|-|-|-|-|-|-|-|-|-|-|
GO:0009259	ribonucleotide metabolic process	biological_process	0.4295	1	8	366	204	10392	Novel000234,FBgn0050109,FBgn0031941,FBgn0034274,FBgn0033834,FBgn0004852,FBgn0028387,FBgn0023416	-|-|-|-|-|-|-|-|
GO:0019693	ribose phosphate metabolic process	biological_process	0.4295	1	8	366	204	10392	Novel000234,FBgn0050109,FBgn0031941,FBgn0034274,FBgn0033834,FBgn0004852,FBgn0023416,FBgn0028387	-|-|-|-|-|-|-|-|
GO:0044267	cellular protein metabolic process	biological_process	0.42982	1	43	366	1180	10392	FBgn0262866,FBgn0051702,FBgn0025720,FBgn0031904,FBgn0010411,FBgn0243512,FBgn0032987,FBgn0037549,FBgn0015288,FBgn0029664,FBgn0032956,FBgn0014877,FBgn0034258,FBgn0034277,FBgn0002938,FBgn0263144,FBgn0025616,FBgn0001983,FBgn0029667,FBgn0029123,FBgn0036924,FBgn0044872,FBgn0266429,FBgn0051703,FBgn0001138,FBgn0036918,FBgn0032168,FBgn0031187,FBgn0029672,FBgn0030617,FBgn0000546,FBgn0030616,FBgn0034249,FBg…	-|-|-|-|-|-|-|-|-|-|-|-|-|-|-|-|-|-|-|-|-|-|-|-|-|-|-|-|-|-|-|-|-|-|-|-|-|-|-|-|-|-|-|
GO:0019725	cellular homeostasis	biological_process	0.43143	1	4	366	95	10392	FBgn0029662,FBgn0001138,FBgn0266489,FBgn0027581	-|-|-|-|
GO:0006820	anion transport	biological_process	0.43149	1	4	366	95	10392	FBgn0051693,FBgn0034275,FBgn0036928,FBgn0037541	-|-|-|-|
GO:0019058	viral infectious cycle	biological_process	0.43485	1	6	366	150	10392	FBgn0261574,FBgn0004638,FBgn0028868,FBgn0260764,FBgn0050431,FBgn0031910	-|-|-|-|-|-|
GO:0006753	nucleoside phosphate metabolic process	biological_process	0.43543	1	11	366	288	10392	FBgn0031941,FBgn0033853,Novel000234,FBgn0050109,FBgn0043456,FBgn0023416,FBgn0028387,FBgn0034274,FBgn0053156,FBgn0004852,FBgn0033834	-|-|-|-|-|-|-|-|-|-|-|
GO:0017080	sodium channel regulator activity	molecular_function	0.43682	1	1	366	16	10392	FBgn0262363	-|
GO:0019871	sodium channel inhibitor activity	molecular_function	0.43682	1	1	366	16	10392	FBgn0262363	-|
GO:0022884	macromolecule transmembrane transporter activity	molecular_function	0.43682	1	1	366	16	10392	FBgn0030617	-|
GO:0016433	rRNA (adenine) methyltransferase activity	molecular_function	0.43683	1	1	366	16	10392	FBgn0263144	-|
GO:0009404	toxin metabolic process	biological_process	0.43683	1	1	366	16	10392	FBgn0029666	-|
GO:0016278	lysine N-methyltransferase activity	molecular_function	0.43683	1	1	366	16	10392	FBgn0263144	-|
GO:0016279	protein-lysine N-methyltransferase activity	molecular_function	0.43683	1	1	366	16	10392	FBgn0263144	-|
GO:0018024	histone-lysine N-methyltransferase activity	molecular_function	0.43683	1	1	366	16	10392	FBgn0263144	-|
GO:0042054	histone methyltransferase activity	molecular_function	0.43683	1	1	366	16	10392	FBgn0263144	-|
GO:0015947	methane metabolic process	biological_process	0.43683	1	1	366	16	10392	FBgn0034488	-|
GO:0043446	cellular alkane metabolic process	biological_process	0.43683	1	1	366	16	10392	FBgn0034488	-|
GO:0043112	receptor metabolic process	biological_process	0.43684	1	1	366	16	10392	FBgn0036932	-|
GO:0003995	acyl-CoA dehydrogenase activity	molecular_function	0.43684	1	1	366	16	10392	FBgn0027572	-|
GO:0022406	membrane docking	biological_process	0.43684	1	1	366	16	10392	FBgn0034271	-|
GO:0048278	vesicle docking	biological_process	0.43684	1	1	366	16	10392	FBgn0034271	-|
GO:0019082	viral protein processing	biological_process	0.43684	1	1	366	16	10392	FBgn0050431	-|
GO:0051179	localization	biological_process	0.43719	1	64	366	1774	10392	FBgn0264389,FBgn0262519,FBgn0031194,FBgn0262867,FBgn0031941,FBgn0000535,FBgn0000180,FBgn0265002,FBgn0003475,FBgn0034271,FBgn0034246,FBgn0031905,FBgn0039941,FBgn0001983,FBgn0040099,FBgn0029667,FBgn0034247,FBgn0029663,FBgn0036920,FBgn0021764,FBgn0086757,FBgn0037541,FBgn0051693,FBgn0027872,FBgn0050109,FBgn0034490,FBgn0034479,FBgn0265835,FBgn0033856,FBgn0034494,FBgn0036928,FBgn0040031,FBgn0034275,FBg…	-|-|-|-|-|-|-|-|-|-|-|-|-|-|-|-|-|-|-|-|-|-|-|-|-|-|-|-|-|-|-|-|-|-|-|-|-|-|-|-|-|-|-|-|-|-|-|-|-|-|-|-|-|-|-|-|-|-|-|-|-|-|-|-|
GO:0008202	steroid metabolic process	biological_process	0.43848	1	2	366	42	10392	FBgn0069973,FBgn0034491	-|-|
GO:0042221	response to chemical stimulus	biological_process	0.43935	1	4	366	96	10392	FBgn0028868,FBgn0000546,FBgn0030600,FBgn0036932	-|-|-|-|
GO:0016568	chromatin modification	biological_process	0.4405	1	3	366	69	10392	FBgn0051703,FBgn0051702,FBgn0030613	-|-|-|
GO:0015075	ion transmembrane transporter activity	molecular_function	0.44108	1	29	366	792	10392	FBgn0034275,FBgn0029663,FBgn0036928,FBgn0034245,FBgn0265835,FBgn0259683,FBgn0031959,FBgn0050109,Novel000234,FBgn0266489,FBgn0034246,FBgn0028387,FBgn0051693,FBgn0261566,FBgn0027581,FBgn0261507,FBgn0029672,FBgn0037541,FBgn0032988,FBgn0030617,FBgn0000535,FBgn0039946,FBgn0031941,FBgn0034489,FBgn0031194,FBgn0010812,FBgn0001138,FBgn0052792,FBgn0039966	-|-|-|-|-|-|-|-|-|-|-|-|-|-|-|-|-|-|-|-|-|-|-|-|-|-|-|-|-|
GO:0016043	cellular component organization	biological_process	0.44158	1	24	366	652	10392	FBgn0030613,FBgn0036929,FBgn0053858,FBgn0052791,FBgn0031187,FBgn0261574,FBgn0004228,FBgn0020880,FBgn0051702,FBgn0036920,FBgn0036932,FBgn0051703,FBgn0085569,FBgn0001983,FBgn0051619,FBgn0033834,FBgn0030614,FBgn0053864,FBgn0266429,FBgn0004638,FBgn0031910,FBgn0029664,FBgn0053861,FBgn0043456	-|-|-|-|-|-|-|-|-|-|-|-|-|-|-|-|-|-|-|-|-|-|-|-|
GO:0008092	cytoskeletal protein binding	molecular_function	0.44564	1	8	366	207	10392	FBgn0003545,FBgn0029664,FBgn0031955,FBgn0031196,FBgn0031187,FBgn0051619,FBgn0003475,FBgn0052791	-|-|-|-|-|-|-|-|
GO:0051186	cofactor metabolic process	biological_process	0.44572	1	8	366	207	10392	FBgn0033065,FBgn0032981,FBgn0033853,FBgn0034489,FBgn0043456,FBgn0028868,FBgn0261800,FBgn0053156	-|-|-|-|-|-|-|-|
GO:0003723	RNA binding	molecular_function	0.44717	1	16	366	430	10392	FBgn0028868,FBgn0036919,FBgn0034258,FBgn0034249,FBgn0034246,FBgn0029666,FBgn0043456,FBgn0036497,Novel000211,FBgn0037549,FBgn0052791,FBgn0030607,FBgn0263774,Novel000089,FBgn0001138,FBgn0010411	-|-|-|-|-|-|-|-|-|-|-|-|-|-|-|-|
GO:0004842	ubiquitin-protein ligase activity	molecular_function	0.4473	1	4	366	97	10392	Novel000089,FBgn0029006,FBgn0036494,FBgn0032974	-|-|-|-|
GO:0019787	small conjugating protein ligase activity	molecular_function	0.4473	1	4	366	97	10392	Novel000089,FBgn0036494,FBgn0029006,FBgn0032974	-|-|-|-|
GO:0003777	microtubule motor activity	molecular_function	0.45026	1	2	366	43	10392	FBgn0031955,FBgn0003545	-|-|
GO:0046434	organophosphate catabolic process	biological_process	0.45514	1	4	366	98	10392	FBgn0033834,FBgn0034274,FBgn0033856,FBgn0043456	-|-|-|-|
GO:0007156	homophilic cell adhesion	biological_process	0.45654	1	1	366	17	10392	FBgn0261574	-|
GO:0030176	integral to endoplasmic reticulum membrane	cellular_component	0.45666	1	1	366	17	10392	FBgn0266429	-|
GO:0005852	eukaryotic translation initiation factor 3 complex	cellular_component	0.45667	1	1	366	17	10392	FBgn0034258	-|
GO:0009072	aromatic amino acid family metabolic process	biological_process	0.4567	1	1	366	17	10392	FBgn0005655	-|
GO:0006305	DNA alkylation	biological_process	0.45671	1	1	366	17	10392	FBgn0037543	-|
GO:0006306	DNA methylation	biological_process	0.45671	1	1	366	17	10392	FBgn0037543	-|
GO:0044728	DNA methylation or demethylation	biological_process	0.45671	1	1	366	17	10392	FBgn0037543	-|
GO:0006839	mitochondrial transport	biological_process	0.45671	1	1	366	17	10392	FBgn0036920	-|
GO:0006505	GPI anchor metabolic process	biological_process	0.45902	1	3	366	71	10392	FBgn0032172,FBgn0034270,FBgn0266429	-|-|-|
GO:0016614	oxidoreductase activity, acting on CH-OH group of donors	molecular_function	0.45992	1	6	366	154	10392	FBgn0034488,FBgn0033856,FBgn0069973,FBgn0043456,FBgn0034276,FBgn0029006	-|-|-|-|-|-|
GO:0050789	regulation of biological process	biological_process	0.46086	1	73	366	2041	10392	FBgn0033075,Novel000040,FBgn0021764,FBgn0027343,Novel000042,FBgn0264895,FBgn0003448,FBgn0033855,FBgn0264449,FBgn0020880,FBgn0036929,FBgn0003016,FBgn0030600,FBgn0034503,FBgn0040805,FBgn0052843,FBgn0004364,FBgn0031906,FBgn0034265,FBgn0000546,FBgn0037546,FBgn0029531,FBgn0036494,FBgn0032184,FBgn0036926,FBgn0036934,FBgn0262519,FBgn0016701,FBgn0000535,FBgn0259148,FBgn0000180,FBgn0031914,FBgn0003475,FBg…	-|-|-|-|-|-|-|-|-|-|-|-|-|-|-|-|-|-|-|-|-|-|-|-|-|-|-|-|-|-|-|-|-|-|-|-|-|-|-|-|-|-|-|-|-|-|-|-|-|-|-|-|-|-|-|-|-|-|-|-|-|-|-|-|-|-|-|-|-|-|-|-|-|
GO:0034220	ion transmembrane transport	biological_process	0.46168	1	8	366	210	10392	FBgn0028387,FBgn0261507,FBgn0039946,FBgn0031941,FBgn0010812,FBgn0267727,FBgn0050109,Novel000234	-|-|-|-|-|-|-|-|
GO:0004386	helicase activity	molecular_function	0.46177	1	8	366	210	10392	FBgn0034246,FBgn0034496,FBgn0001138,FBgn0262519,FBgn0051755,FBgn0036497,FBgn0028868,FBgn0037549	-|-|-|-|-|-|-|-|
GO:0006575	cellular modified amino acid metabolic process	biological_process	0.4623	1	2	366	44	10392	FBgn0261800,FBgn0025837	-|-|
GO:0046873	metal ion transmembrane transporter activity	molecular_function	0.46266	1	12	366	322	10392	FBgn0266489,FBgn0039966,FBgn0034246,FBgn0001138,FBgn0052792,FBgn0034489,FBgn0031959,FBgn0030617,FBgn0029672,FBgn0265835,FBgn0029663,FBgn0027581	-|-|-|-|-|-|-|-|-|-|-|-|
GO:0050794	regulation of cellular process	biological_process	0.46563	1	71	366	1987	10392	FBgn0031902,FBgn0029664,FBgn0266489,FBgn0261571,FBgn0015799,FBgn0011584,FBgn0013303,FBgn0004009,FBgn0266429,FBgn0025836,FBgn0036932,FBgn0031904,FBgn0039966,FBgn0050106,FBgn0027581,FBgn0030613,FBgn0036497,FBgn0004852,FBgn0034249,FBgn0037551,FBgn0028868,FBgn0022740,FBgn0005655,FBgn0031903,FBgn0263994,FBgn0013746,FBgn0024556,FBgn0031188,FBgn0001138,FBgn0023416,FBgn0036916,FBgn0028387,FBgn0033853,FBg…	-|-|-|-|-|-|-|-|-|-|-|-|-|-|-|-|-|-|-|-|-|-|-|-|-|-|-|-|-|-|-|-|-|-|-|-|-|-|-|-|-|-|-|-|-|-|-|-|-|-|-|-|-|-|-|-|-|-|-|-|-|-|-|-|-|-|-|-|-|-|-|
GO:0044710	single-organism metabolic process	biological_process	0.46915	1	67	366	1875	10392	FBgn0031948,Novel000089,FBgn0032973,FBgn0001099,FBgn0034488,FBgn0031194,FBgn0002524,FBgn0031941,FBgn0261800,FBgn0052220,FBgn0043456,FBgn0034276,FBgn0029666,FBgn0034487,FBgn0034246,FBgn0032981,FBgn0034258,FBgn0033065,FBgn0033853,FBgn0030612,FBgn0030607,FBgn0264895,FBgn0261566,FBgn0025687,FBgn0030615,FBgn0025837,FBgn0027343,FBgn0033856,FBgn0033844,FBgn0263830,FBgn0036927,FBgn0027572,FBgn0050109,FBg…	-|-|-|-|-|-|-|-|-|-|-|-|-|-|-|-|-|-|-|-|-|-|-|-|-|-|-|-|-|-|-|-|-|-|-|-|-|-|-|-|-|-|-|-|-|-|-|-|-|-|-|-|-|-|-|-|-|-|-|-|-|-|-|-|-|-|-|
GO:0071840	cellular component organization or biogenesis	biological_process	0.47056	1	27	366	746	10392	FBgn0036920,FBgn0033072,FBgn0051703,FBgn0036932,FBgn0263774,FBgn0051702,FBgn0020880,FBgn0031187,FBgn0004228,FBgn0261574,FBgn0053858,FBgn0052791,FBgn0030613,FBgn0036929,FBgn0053861,FBgn0043456,FBgn0263144,FBgn0031910,FBgn0029664,FBgn0004638,FBgn0266429,FBgn0051619,FBgn0033834,FBgn0053864,FBgn0030614,FBgn0085569,FBgn0001983	-|-|-|-|-|-|-|-|-|-|-|-|-|-|-|-|-|-|-|-|-|-|-|-|-|-|-|
GO:0003774	motor activity	molecular_function	0.4706	1	3	366	73	10392	FBgn0002938,FBgn0003545,FBgn0031955	-|-|-|
GO:0009144	purine nucleoside triphosphate metabolic process	biological_process	0.47219	1	6	366	156	10392	FBgn0033834,FBgn0034274,Novel000234,FBgn0050109,FBgn0031941,FBgn0028387	-|-|-|-|-|-|
GO:0009199	ribonucleoside triphosphate metabolic process	biological_process	0.47219	1	6	366	156	10392	FBgn0034274,FBgn0033834,Novel000234,FBgn0050109,FBgn0031941,FBgn0028387	-|-|-|-|-|-|
GO:0009205	purine ribonucleoside triphosphate metabolic process	biological_process	0.47219	1	6	366	156	10392	FBgn0033834,FBgn0034274,Novel000234,FBgn0050109,FBgn0031941,FBgn0028387	-|-|-|-|-|-|
GO:0072521	purine-containing compound metabolic process	biological_process	0.4722	1	9	366	240	10392	Novel000234,FBgn0050109,FBgn0031941,FBgn0004852,FBgn0033834,FBgn0034274,FBgn0028387,FBgn0023416,FBgn0028868	-|-|-|-|-|-|-|-|-|
GO:0034470	ncRNA processing	biological_process	0.47251	1	7	366	184	10392	FBgn0263144,FBgn0033072,FBgn0034276,FBgn0261802,FBgn0028868,FBgn0034249,FBgn0037543	-|-|-|-|-|-|-|
GO:0016298	lipase activity	molecular_function	0.47345	1	2	366	45	10392	FBgn0034491,FBgn0032973	-|-|
GO:0016485	protein processing	biological_process	0.47393	1	2	366	45	10392	FBgn0050431,FBgn0036924	-|-|
GO:0051604	protein maturation	biological_process	0.47393	1	2	366	45	10392	FBgn0036924,FBgn0050431	-|-|
GO:0005787	signal peptidase complex	cellular_component	0.47574	1	1	366	18	10392	FBgn0036924	-|
GO:0006465	signal peptide processing	biological_process	0.47574	1	1	366	18	10392	FBgn0036924	-|
GO:0022414	reproductive process	biological_process	0.47735	1	3	366	73	10392	FBgn0021764,FBgn0032969,FBgn0030600	-|-|-|
GO:0005694	chromosome	cellular_component	0.47829	1	6	366	157	10392	FBgn0053861,FBgn0053864,FBgn0037539,FBgn0005655,FBgn0053858,FBgn0029531	-|-|-|-|-|-|
GO:0048610	cellular process involved in reproduction	biological_process	0.47837	1	4	366	101	10392	FBgn0261574,FBgn0004638,FBgn0031910,FBgn0021764	-|-|-|-|
GO:0006520	cellular amino acid metabolic process	biological_process	0.48226	1	9	366	242	10392	FBgn0005655,FBgn0036927,FBgn0261800,FBgn0030612,FBgn0025837,FBgn0029664,FBgn0002524,FBgn0025687,FBgn0034276	-|-|-|-|-|-|-|-|-|
GO:0022892	substrate-specific transporter activity	molecular_function	0.48436	1	31	366	864	10392	FBgn0031194,FBgn0034489,FBgn0031941,FBgn0039966,FBgn0052792,FBgn0001138,FBgn0267727,FBgn0010812,FBgn0261507,FBgn0027581,FBgn0261566,FBgn0051693,FBgn0028387,FBgn0000535,FBgn0039946,FBgn0032988,FBgn0037541,FBgn0030617,FBgn0029672,FBgn0031959,FBgn0259683,FBgn0034246,FBgn0266489,Novel000234,FBgn0050109,FBgn0036928,FBgn0034275,FBgn0029663,FBgn0011584,FBgn0034245,FBgn0265835	-|-|-|-|-|-|-|-|-|-|-|-|-|-|-|-|-|-|-|-|-|-|-|-|-|-|-|-|-|-|-|
GO:0009141	nucleoside triphosphate metabolic process	biological_process	0.48454	1	6	366	158	10392	FBgn0033834,FBgn0034274,FBgn0050109,Novel000234,FBgn0031941,FBgn0028387	-|-|-|-|-|-|
GO:0005886	plasma membrane	cellular_component	0.48517	1	5	366	130	10392	FBgn0001138,FBgn0030617,FBgn0050431,FBgn0011584,FBgn0262519	-|-|-|-|-|
GO:0003743	translation initiation factor activity	molecular_function	0.48558	1	2	366	46	10392	FBgn0001138,FBgn0034258	-|-|
GO:0033179	proton-transporting V-type ATPase, V0 domain	cellular_component	0.48561	1	2	366	46	10392	FBgn0261507,FBgn0039946	-|-|
GO:1901565	organonitrogen compound catabolic process	biological_process	0.49221	1	5	366	131	10392	FBgn0030612,FBgn0034276,FBgn0034274,FBgn0033834,FBgn0005655	-|-|-|-|-|
GO:0006887	exocytosis	biological_process	0.4943	1	1	366	19	10392	FBgn0034271	-|
GO:0006403	RNA localization	biological_process	0.49436	1	1	366	19	10392	FBgn0030617	-|
GO:0050657	nucleic acid transport	biological_process	0.49436	1	1	366	19	10392	FBgn0030617	-|
GO:0050658	RNA transport	biological_process	0.49436	1	1	366	19	10392	FBgn0030617	-|
GO:0051236	establishment of RNA localization	biological_process	0.49436	1	1	366	19	10392	FBgn0030617	-|
GO:0016044	cellular membrane organization	biological_process	0.49436	1	1	366	19	10392	FBgn0033834	-|
GO:0009067	aspartate family amino acid biosynthetic process	biological_process	0.49436	1	1	366	19	10392	FBgn0025687	-|
GO:0009401	phosphoenolpyruvate-dependent sugar phosphotransferase system	biological_process	0.49437	1	1	366	19	10392	FBgn0039946	-|
GO:0040029	regulation of gene expression, epigenetic	biological_process	0.49437	1	1	366	19	10392	FBgn0037543	-|
GO:0009396	folic acid-containing compound biosynthetic process	biological_process	0.49437	1	1	366	19	10392	FBgn0261800	-|
GO:0018193	peptidyl-amino acid modification	biological_process	0.49437	1	1	366	19	10392	FBgn0025616	-|
GO:0005956	protein kinase CK2 complex	cellular_component	0.49438	1	1	366	19	10392	FBgn0026136	-|
GO:0000152	nuclear ubiquitin ligase complex	cellular_component	0.49539	1	3	366	75	10392	Novel000089,FBgn0259148,FBgn0036494	-|-|-|
GO:0005680	anaphase-promoting complex	cellular_component	0.49539	1	3	366	75	10392	FBgn0036494,Novel000089,FBgn0259148	-|-|-|
GO:0016667	oxidoreductase activity, acting on a sulfur group of donors	molecular_function	0.4954	1	3	366	75	10392	FBgn0000565,FBgn0030616,FBgn0029662	-|-|-|
GO:0071822	protein complex subunit organization	biological_process	0.49892	1	5	366	132	10392	FBgn0036929,FBgn0001983,FBgn0030614,FBgn0004228,FBgn0043456	-|-|-|-|-|
GO:0034637	cellular carbohydrate biosynthetic process	biological_process	0.50556	1	5	366	133	10392	FBgn0052220,FBgn0031908,FBgn0069973,FBgn0031907,FBgn0262866	-|-|-|-|-|
GO:0006810	transport	biological_process	0.5087	1	61	366	1725	10392	FBgn0010812,FBgn0001138,FBgn0036920,FBgn0016975,FBgn0021764,FBgn0086757,FBgn0037541,FBgn0029672,FBgn0030617,FBgn0039946,FBgn0025697,FBgn0051693,FBgn0027872,FBgn0028387,FBgn0260855,FBgn0261507,FBgn0034490,FBgn0051835,FBgn0050109,FBgn0259683,FBgn0034479,FBgn0031959,FBgn0033856,FBgn0260964,FBgn0086368,FBgn0265835,FBgn0034494,FBgn0040031,FBgn0034275,FBgn0036928,FBgn0267727,FBgn0052792,FBgn0039966,FBg…	-|-|-|-|-|-|-|-|-|-|-|-|-|-|-|-|-|-|-|-|-|-|-|-|-|-|-|-|-|-|-|-|-|-|-|-|-|-|-|-|-|-|-|-|-|-|-|-|-|-|-|-|-|-|-|-|-|-|-|-|-|
GO:0051234	establishment of localization	biological_process	0.5087	1	61	366	1725	10392	FBgn0260855,FBgn0261507,FBgn0027872,FBgn0051693,FBgn0025697,FBgn0028387,FBgn0037541,FBgn0029672,FBgn0030617,FBgn0039946,FBgn0086757,FBgn0021764,FBgn0036920,FBgn0016975,FBgn0010812,FBgn0001138,FBgn0040031,FBgn0034275,FBgn0036928,FBgn0034494,FBgn0260964,FBgn0086368,FBgn0033856,FBgn0265835,FBgn0259683,FBgn0034479,FBgn0031959,FBgn0051835,FBgn0050109,FBgn0034490,FBgn0027581,FBgn0003475,FBgn0260953,FBg…	-|-|-|-|-|-|-|-|-|-|-|-|-|-|-|-|-|-|-|-|-|-|-|-|-|-|-|-|-|-|-|-|-|-|-|-|-|-|-|-|-|-|-|-|-|-|-|-|-|-|-|-|-|-|-|-|-|-|-|-|-|
GO:0016071	mRNA metabolic process	biological_process	0.51189	1	5	366	134	10392	FBgn0052791,FBgn0030600,FBgn0033859,FBgn0003559,FBgn0001138	-|-|-|-|-|
GO:0070008	serine-type exopeptidase activity	molecular_function	0.51217	1	1	366	20	10392	FBgn0032969	-|
GO:0015932	nucleobase-containing compound transmembrane transporter activity	molecular_function	0.5122	1	1	366	20	10392	FBgn0030617	-|
GO:0009522	photosystem I	cellular_component	0.5122	1	1	366	20	10392	FBgn0052843	-|
GO:0009066	aspartate family amino acid metabolic process	biological_process	0.51221	1	1	366	20	10392	FBgn0025687	-|
GO:0006760	folic acid-containing compound metabolic process	biological_process	0.51221	1	1	366	20	10392	FBgn0261800	-|
GO:0042559	pteridine-containing compound biosynthetic process	biological_process	0.51221	1	1	366	20	10392	FBgn0261800	-|
GO:0004616	phosphogluconate dehydrogenase (decarboxylating) activity	molecular_function	0.51222	1	1	366	20	10392	FBgn0043456	-|
GO:0004871	signal transducer activity	molecular_function	0.51259	1	17	366	476	10392	FBgn0000546,FBgn0013765,FBgn0037546,FBgn0037551,FBgn0259683,FBgn0052843,FBgn0266429,FBgn0036934,FBgn0262867,Novel000089,FBgn0050106,FBgn0036497,FBgn0265002,FBgn0016701,FBgn0000535,FBgn0020880,FBgn0031914	-|-|-|-|-|-|-|-|-|-|-|-|-|-|-|-|-|
GO:0060089	molecular transducer activity	molecular_function	0.51259	1	17	366	476	10392	FBgn0037551,FBgn0037546,FBgn0259683,FBgn0013765,FBgn0000546,FBgn0052843,FBgn0266429,FBgn0262867,FBgn0036934,Novel000089,FBgn0265002,FBgn0036497,FBgn0050106,FBgn0020880,FBgn0031914,FBgn0000535,FBgn0016701	-|-|-|-|-|-|-|-|-|-|-|-|-|-|-|-|-|
GO:0006464	cellular protein modification process	biological_process	0.5146	1	20	366	562	10392	FBgn0037543,FBgn0029667,FBgn0031952,FBgn0025616,FBgn0266429,FBgn0044872,FBgn0086368,FBgn0032172,FBgn0034270,FBgn0034277,FBgn0259683,FBgn0002938,FBgn0263144,FBgn0037549,FBgn0243512,FBgn0029672,FBgn0051702,FBgn0262866,FBgn0025720,FBgn0051703	-|-|-|-|-|-|-|-|-|-|-|-|-|-|-|-|-|-|-|-|
GO:0036211	protein modification process	biological_process	0.5146	1	20	366	562	10392	FBgn0029672,FBgn0243512,FBgn0037549,FBgn0051703,FBgn0025720,FBgn0051702,FBgn0262866,FBgn0034270,FBgn0032172,FBgn0086368,FBgn0044872,FBgn0266429,FBgn0025616,FBgn0031952,FBgn0029667,FBgn0037543,FBgn0263144,FBgn0002938,FBgn0259683,FBgn0034277	-|-|-|-|-|-|-|-|-|-|-|-|-|-|-|-|-|-|-|-|
GO:0003677	DNA binding	molecular_function	0.51781	1	46	366	1303	10392	FBgn0053859,FBgn0034246,FBgn0266489,FBgn0015664,FBgn0031196,FBgn0053873,FBgn0053864,FBgn0037539,FBgn0053857,FBgn0029657,FBgn0053863,FBgn0040477,FBgn0051702,FBgn0262519,FBgn0002524,FBgn0028979,FBgn0016701,FBgn0053858,FBgn0037549,FBgn0027581,FBgn0053866,FBgn0030613,FBgn0053861,FBgn0053121,FBgn0053862,FBgn0037546,FBgn0000546,FBgn0004638,FBgn0053870,FBgn0053872,FBgn0053869,FBgn0037543,FBgn0005655,FBg…	-|-|-|-|-|-|-|-|-|-|-|-|-|-|-|-|-|-|-|-|-|-|-|-|-|-|-|-|-|-|-|-|-|-|-|-|-|-|-|-|-|-|-|-|-|-|
GO:0016616	oxidoreductase activity, acting on the CH-OH group of donors, NAD or NADP as acceptor	molecular_function	0.51893	1	5	366	135	10392	FBgn0069973,FBgn0033856,FBgn0043456,FBgn0029006,FBgn0034488	-|-|-|-|-|
GO:0043603	cellular amide metabolic process	biological_process	0.51922	1	2	366	49	10392	FBgn0025837,FBgn0036924	-|-|
GO:0015711	organic anion transport	biological_process	0.51924	1	2	366	49	10392	FBgn0036928,FBgn0037541	-|-|
GO:0008173	RNA methyltransferase activity	molecular_function	0.5193	1	2	366	49	10392	FBgn0263144,FBgn0037543	-|-|
GO:0016701	oxidoreductase activity, acting on single donors with incorporation of molecular oxygen	molecular_function	0.51931	1	2	366	49	10392	FBgn0005655,FBgn0025836	-|-|
GO:0043233	organelle lumen	cellular_component	0.52019	1	13	366	364	10392	FBgn0033065,FBgn0034489,FBgn0034265,FBgn0032184,FBgn0053872,FBgn0053869,FBgn0034259,FBgn0003016,FBgn0034503,FBgn0053868,FBgn0005655,FBgn0014037,FBgn0053870	-|-|-|-|-|-|-|-|-|-|-|-|-|
GO:0070013	intracellular organelle lumen	cellular_component	0.52019	1	13	366	364	10392	FBgn0053870,FBgn0034503,FBgn0053868,FBgn0014037,FBgn0005655,FBgn0053869,FBgn0053872,FBgn0034259,FBgn0003016,FBgn0032184,FBgn0034489,FBgn0034265,FBgn0033065	-|-|-|-|-|-|-|-|-|-|-|-|-|
GO:0022891	substrate-specific transmembrane transporter activity	molecular_function	0.52211	1	29	366	821	10392	FBgn0039966,FBgn0052792,FBgn0010812,FBgn0001138,FBgn0034489,FBgn0031194,FBgn0031941,FBgn0000535,FBgn0039946,FBgn0029672,FBgn0037541,FBgn0032988,FBgn0030617,FBgn0027581,FBgn0261507,FBgn0261566,FBgn0051693,FBgn0028387,FBgn0266489,FBgn0034246,FBgn0050109,Novel000234,FBgn0031959,FBgn0259683,FBgn0034245,FBgn0265835,FBgn0036928,FBgn0034275,FBgn0029663	-|-|-|-|-|-|-|-|-|-|-|-|-|-|-|-|-|-|-|-|-|-|-|-|-|-|-|-|-|
GO:1901135	carbohydrate derivative metabolic process	biological_process	0.52571	1	23	366	651	10392	FBgn0004852,FBgn0023416,FBgn0028387,FBgn0031941,FBgn0262866,FBgn0032172,FBgn0034274,FBgn0033834,FBgn0052220,FBgn0034270,FBgn0044872,FBgn0266429,FBgn0027600,FBgn0033856,FBgn0086368,FBgn0052499,FBgn0028868,FBgn0051875,FBgn0043456,Novel000234,FBgn0050109,FBgn0034277,FBgn0259683	-|-|-|-|-|-|-|-|-|-|-|-|-|-|-|-|-|-|-|-|-|-|-|
GO:0005515	protein binding	molecular_function	0.52657	1	89	366	2531	10392	FBgn0031903,FBgn0016059,FBgn0034274,FBgn0051619,FBgn0022740,FBgn0028868,FBgn0031947,FBgn0011705,FBgn0028370,FBgn0021847,FBgn0037551,FBgn0030603,FBgn0036918,FBgn0033845,FBgn0039943,FBgn0085450,FBgn0010812,FBgn0016975,FBgn0029006,FBgn0013746,FBgn0004009,FBgn0032971,FBgn0261571,FBgn0036500,FBgn0014877,FBgn0034484,FBgn0029664,FBgn0031902,FBgn0016976,FBgn0261574,FBgn0040294,FBgn0034262,FBgn0032171,FBg…	-|-|-|-|-|-|-|-|-|-|-|-|-|-|-|-|-|-|-|-|-|-|-|-|-|-|-|-|-|-|-|-|-|-|-|-|-|-|-|-|-|-|-|-|-|-|-|-|-|-|-|-|-|-|-|-|-|-|-|-|-|-|-|-|-|-|-|-|-|-|-|-|-|-|-|-|-|-|-|-|-|-|-|-|-|-|-|-|-|
GO:0042623	ATPase activity, coupled	molecular_function	0.52708	1	6	366	165	10392	FBgn0037549,FBgn0050109,FBgn0051755,FBgn0010812,FBgn0034496,FBgn0034246	-|-|-|-|-|-|
GO:0044255	cellular lipid metabolic process	biological_process	0.52838	1	13	366	366	10392	FBgn0027572,FBgn0032172,FBgn0031948,FBgn0034270,FBgn0052220,FBgn0028377,FBgn0266429,FBgn0033844,FBgn0262866,FBgn0001099,FBgn0034276,FBgn0051875,FBgn0032955	-|-|-|-|-|-|-|-|-|-|-|-|-|
GO:0015171	amino acid transmembrane transporter activity	molecular_function	0.52933	1	1	366	21	10392	FBgn0032988	-|
GO:0006275	regulation of DNA replication	biological_process	0.52935	1	1	366	21	10392	FBgn0005655	-|
GO:0031227	intrinsic to endoplasmic reticulum membrane	cellular_component	0.52938	1	1	366	21	10392	FBgn0266429	-|
GO:0015931	nucleobase-containing compound transport	biological_process	0.52941	1	1	366	21	10392	FBgn0030617	-|
GO:0008649	rRNA methyltransferase activity	molecular_function	0.52942	1	1	366	21	10392	FBgn0263144	-|
GO:0004803	transposase activity	molecular_function	0.52942	1	1	366	21	10392	Novel000042	-|
GO:0042558	pteridine-containing compound metabolic process	biological_process	0.52943	1	1	366	21	10392	FBgn0261800	-|
GO:0005577	fibrinogen complex	cellular_component	0.52943	1	1	366	21	10392	FBgn0036929	-|
GO:0030168	platelet activation	biological_process	0.52943	1	1	366	21	10392	FBgn0036929	-|
GO:0004540	ribonuclease activity	molecular_function	0.5299	1	2	366	50	10392	FBgn0034246,FBgn0034249	-|-|
GO:0042802	identical protein binding	molecular_function	0.53014	1	2	366	50	10392	FBgn0014877,FBgn0016919	-|-|
GO:0016831	carboxy-lyase activity	molecular_function	0.53015	1	2	366	50	10392	FBgn0040099,FBgn0031957	-|-|
GO:0051726	regulation of cell cycle	biological_process	0.53016	1	2	366	50	10392	FBgn0015799,FBgn0005655	-|-|
GO:0006664	glycolipid metabolic process	biological_process	0.53036	1	3	366	79	10392	FBgn0266429,FBgn0032172,FBgn0034270	-|-|-|
GO:0051704	multi-organism process	biological_process	0.5318	1	23	366	653	10392	FBgn0034494,FBgn0028868,FBgn0029123,FBgn0263144,FBgn0261802,FBgn0261571,FBgn0004638,FBgn0031910,FBgn0261574,FBgn0040294,FBgn0036929,FBgn0030613,FBgn0050431,FBgn0025836,FBgn0033072,FBgn0031912,Novel000089,FBgn0032184,FBgn0265576,FBgn0260764,FBgn0013746,FBgn0262363,FBgn0032969	-|-|-|-|-|-|-|-|-|-|-|-|-|-|-|-|-|-|-|-|-|-|-|
GO:0016053	organic acid biosynthetic process	biological_process	0.53198	1	5	366	137	10392	FBgn0001099,FBgn0028377,FBgn0025687,FBgn0261800,FBgn0032955	-|-|-|-|-|
GO:0046394	carboxylic acid biosynthetic process	biological_process	0.53198	1	5	366	137	10392	FBgn0001099,FBgn0028377,FBgn0025687,FBgn0261800,FBgn0032955	-|-|-|-|-|
GO:0038023	signaling receptor activity	molecular_function	0.53644	1	13	366	368	10392	FBgn0266429,FBgn0031914,FBgn0020880,FBgn0050106,FBgn0265002,FBgn0052843,Novel000089,FBgn0000546,FBgn0262867,FBgn0036934,FBgn0013765,FBgn0259683,FBgn0037546	-|-|-|-|-|-|-|-|-|-|-|-|-|
GO:0000003	reproduction	biological_process	0.53892	1	6	366	167	10392	FBgn0261574,FBgn0004638,FBgn0030600,FBgn0032969,FBgn0031910,FBgn0021764	-|-|-|-|-|-|
GO:0007018	microtubule-based movement	biological_process	0.54074	1	2	366	51	10392	FBgn0031955,FBgn0003545	-|-|
GO:0004872	receptor activity	molecular_function	0.54149	1	14	366	398	10392	FBgn0031914,FBgn0020880,FBgn0266429,FBgn0265002,FBgn0034259,FBgn0050106,Novel000089,FBgn0052843,FBgn0259683,FBgn0037546,FBgn0013765,FBgn0262867,FBgn0036934,FBgn0000546	-|-|-|-|-|-|-|-|-|-|-|-|-|-|
GO:0001775	cell activation	biological_process	0.54597	1	1	366	22	10392	FBgn0036929	-|
GO:0007617	mating behavior	biological_process	0.54601	1	1	366	22	10392	FBgn0032969	-|
GO:0019098	reproductive behavior	biological_process	0.54601	1	1	366	22	10392	FBgn0032969	-|
GO:0017137	Rab GTPase binding	molecular_function	0.54601	1	1	366	22	10392	FBgn0003475	-|
GO:0060590	ATPase regulator activity	molecular_function	0.54602	1	1	366	22	10392	FBgn0014877	-|
GO:0006457	protein folding	biological_process	0.5475	1	3	366	81	10392	FBgn0014877,FBgn0036918,FBgn0026738	-|-|-|
GO:0043412	macromolecule modification	biological_process	0.55013	1	23	366	659	10392	FBgn0043456,FBgn0002938,FBgn0263144,FBgn0034277,FBgn0259683,FBgn0266429,FBgn0044872,FBgn0086368,FBgn0032172,FBgn0034270,FBgn0037543,FBgn0029667,FBgn0031952,FBgn0028868,FBgn0025616,FBgn0051703,FBgn0262866,FBgn0051702,FBgn0263774,FBgn0025720,FBgn0029672,FBgn0037549,FBgn0243512	-|-|-|-|-|-|-|-|-|-|-|-|-|-|-|-|-|-|-|-|-|-|-|
GO:0008017	microtubule binding	molecular_function	0.55149	1	2	366	52	10392	FBgn0003545,FBgn0031955	-|-|
GO:0043168	anion binding	molecular_function	0.55205	1	46	366	1319	10392	FBgn0036497,FBgn0027581,FBgn0037549,FBgn0016701,FBgn0028377,FBgn0034489,FBgn0002524,FBgn0034488,FBgn0001099,FBgn0262519,FBgn0262866,FBgn0039966,FBgn0036931,FBgn0000559,FBgn0032167,FBgn0029657,FBgn0029123,FBgn0040099,FBgn0034493,FBgn0033065,FBgn0031955,FBgn0014877,FBgn0029664,FBgn0266489,FBgn0034246,FBgn0031957,FBgn0034276,FBgn0002938,FBgn0261802,FBgn0264895,FBgn0030612,FBgn0051755,FBgn0033842,FBg…	-|-|-|-|-|-|-|-|-|-|-|-|-|-|-|-|-|-|-|-|-|-|-|-|-|-|-|-|-|-|-|-|-|-|-|-|-|-|-|-|-|-|-|-|-|-|
GO:0006811	ion transport	biological_process	0.5548	1	25	366	718	10392	FBgn0031941,FBgn0034489,FBgn0267727,FBgn0010812,FBgn0052792,FBgn0039966,FBgn0260953,FBgn0051693,FBgn0028387,FBgn0261507,FBgn0037541,FBgn0029672,FBgn0030617,FBgn0039946,FBgn0000535,FBgn0030610,FBgn0031959,FBgn0050109,Novel000234,FBgn0051835,FBgn0034246,FBgn0034275,FBgn0036928,FBgn0033856,FBgn0265835	-|-|-|-|-|-|-|-|-|-|-|-|-|-|-|-|-|-|-|-|-|-|-|-|-|
GO:0006796	phosphate-containing compound metabolic process	biological_process	0.55856	1	26	366	748	10392	FBgn0034270,FBgn0053156,FBgn0033834,FBgn0034274,FBgn0032172,FBgn0033844,FBgn0033856,FBgn0266429,FBgn0031952,FBgn0029667,FBgn0051875,FBgn0002938,FBgn0043456,Novel000234,FBgn0050109,FBgn0033853,FBgn0259683,FBgn0004852,FBgn0031948,FBgn0029672,FBgn0243512,FBgn0023416,FBgn0028387,Novel000089,FBgn0031941,FBgn0262866	-|-|-|-|-|-|-|-|-|-|-|-|-|-|-|-|-|-|-|-|-|-|-|-|-|-|
GO:0044403	symbiosis, encompassing mutualism through parasitism	biological_process	0.56033	1	13	366	374	10392	FBgn0261574,FBgn0028868,FBgn0036929,FBgn0050431,FBgn0025836,FBgn0263144,FBgn0261571,FBgn0261802,FBgn0004638,FBgn0265576,FBgn0031910,FBgn0013746,FBgn0260764	-|-|-|-|-|-|-|-|-|-|-|-|-|
GO:0044419	interspecies interaction between organisms	biological_process	0.56033	1	13	366	374	10392	FBgn0265576,FBgn0004638,FBgn0260764,FBgn0031910,FBgn0013746,FBgn0263144,FBgn0025836,FBgn0261802,FBgn0261571,FBgn0036929,FBgn0028868,FBgn0050431,FBgn0261574	-|-|-|-|-|-|-|-|-|-|-|-|-|
GO:0016829	lyase activity	molecular_function	0.56111	1	7	366	200	10392	FBgn0036927,FBgn0023416,FBgn0002524,FBgn0040099,FBgn0004852,FBgn0031957,FBgn0040963	-|-|-|-|-|-|-|
GO:0032940	secretion by cell	biological_process	0.56182	1	2	366	53	10392	FBgn0034271,FBgn0001138	-|-|
GO:0046903	secretion	biological_process	0.56182	1	2	366	53	10392	FBgn0001138,FBgn0034271	-|-|
GO:0016337	cell-cell adhesion	biological_process	0.56193	1	1	366	23	10392	FBgn0261574	-|
GO:0051052	regulation of DNA metabolic process	biological_process	0.56199	1	1	366	23	10392	FBgn0005655	-|
GO:0019748	secondary metabolic process	biological_process	0.562	1	1	366	23	10392	FBgn0029666	-|
GO:0000990	core RNA polymerase binding transcription factor activity	molecular_function	0.56203	1	1	366	23	10392	FBgn0033855	-|
GO:0000996	core DNA-dependent RNA polymerase binding promoter specificity activity	molecular_function	0.56203	1	1	366	23	10392	FBgn0033855	-|
GO:0016987	sigma factor activity	molecular_function	0.56203	1	1	366	23	10392	FBgn0033855	-|
GO:0007618	mating	biological_process	0.56203	1	1	366	23	10392	FBgn0032969	-|
GO:0044703	multi-organism reproductive process	biological_process	0.56203	1	1	366	23	10392	FBgn0032969	-|
GO:0006825	copper ion transport	biological_process	0.56203	1	1	366	23	10392	FBgn0030610	-|
GO:0006891	intra-Golgi vesicle-mediated transport	biological_process	0.56205	1	1	366	23	10392	FBgn0086757	-|
GO:0008831	dTDP-4-dehydrorhamnose reductase activity	molecular_function	0.56206	1	1	366	23	10392	FBgn0069973	-|
GO:0006098	pentose-phosphate shunt	biological_process	0.56207	1	1	366	23	10392	FBgn0043456	-|
GO:0006740	NADPH regeneration	biological_process	0.56207	1	1	366	23	10392	FBgn0043456	-|
GO:0005789	endoplasmic reticulum membrane	cellular_component	0.56405	1	3	366	83	10392	FBgn0266429,FBgn0036924,FBgn0034277	-|-|-|
GO:0042175	nuclear outer membrane-endoplasmic reticulum membrane network	cellular_component	0.56405	1	3	366	83	10392	FBgn0036924,FBgn0266429,FBgn0034277	-|-|-|
GO:0071944	cell periphery	cellular_component	0.56629	1	7	366	201	10392	FBgn0262519,FBgn0050431,FBgn0011584,FBgn0004228,FBgn0034271,FBgn0030617,FBgn0001138	-|-|-|-|-|-|-|
GO:0006886	intracellular protein transport	biological_process	0.5686	1	11	366	318	10392	FBgn0016976,FBgn0003475,FBgn0036928,FBgn0267727,FBgn0016975,FBgn0036920,FBgn0021764,FBgn0014877,FBgn0031905,FBgn0031194,FBgn0086757	-|-|-|-|-|-|-|-|-|-|-|
GO:0050896	response to stimulus	biological_process	0.56921	1	51	366	1470	10392	FBgn0013303,FBgn0004009,FBgn0266429,FBgn0011584,FBgn0034276,Novel000234,FBgn0261571,FBgn0033853,FBgn0031902,FBgn0029664,FBgn0016701,FBgn0004852,FBgn0031914,FBgn0259148,FBgn0000535,FBgn0000180,FBgn0036497,FBgn0050106,FBgn0003475,FBgn0039966,FBgn0025836,FBgn0036932,FBgn0036494,FBgn0036934,FBgn0036926,FBgn0032969,FBgn0262519,FBgn0031903,FBgn0011705,FBgn0028868,FBgn0005655,FBgn0052843,FBgn0040805,FBg…	-|-|-|-|-|-|-|-|-|-|-|-|-|-|-|-|-|-|-|-|-|-|-|-|-|-|-|-|-|-|-|-|-|-|-|-|-|-|-|-|-|-|-|-|-|-|-|-|-|-|-|
GO:0072594	establishment of protein localization to organelle	biological_process	0.57211	1	2	366	54	10392	FBgn0036920,FBgn0086757	-|-|
GO:0006720	isoprenoid metabolic process	biological_process	0.57211	1	2	366	54	10392	FBgn0051875,FBgn0034276	-|-|
GO:0008299	isoprenoid biosynthetic process	biological_process	0.57211	1	2	366	54	10392	FBgn0051875,FBgn0034276	-|-|
GO:0015979	photosynthesis	biological_process	0.57371	1	6	366	173	10392	FBgn0039942,FBgn0028868,FBgn0001138,FBgn0084001,FBgn0036496,FBgn0052843	-|-|-|-|-|-|
GO:0015276	ligand-gated ion channel activity	molecular_function	0.5741	1	4	366	114	10392	FBgn0001138,FBgn0266489,FBgn0259683,FBgn0027581	-|-|-|-|
GO:0022834	ligand-gated channel activity	molecular_function	0.5741	1	4	366	114	10392	FBgn0266489,FBgn0001138,FBgn0027581,FBgn0259683	-|-|-|-|
GO:0006793	phosphorus metabolic process	biological_process	0.57557	1	26	366	754	10392	FBgn0033853,FBgn0259683,FBgn0002938,FBgn0051875,FBgn0043456,Novel000234,FBgn0050109,FBgn0031952,FBgn0029667,FBgn0032172,FBgn0034274,FBgn0034270,FBgn0053156,FBgn0033834,FBgn0266429,FBgn0033844,FBgn0033856,FBgn0031941,FBgn0262866,Novel000089,FBgn0023416,FBgn0243512,FBgn0028387,FBgn0031948,FBgn0004852,FBgn0029672	-|-|-|-|-|-|-|-|-|-|-|-|-|-|-|-|-|-|-|-|-|-|-|-|-|-|
GO:0055086	nucleobase-containing small molecule metabolic process	biological_process	0.57643	1	12	366	349	10392	FBgn0034274,FBgn0053156,FBgn0033834,FBgn0004852,FBgn0028387,FBgn0028868,FBgn0023416,Novel000234,FBgn0050109,FBgn0043456,FBgn0031941,FBgn0033853	-|-|-|-|-|-|-|-|-|-|-|-|
GO:0014070	response to organic cyclic compound	biological_process	0.57741	1	1	366	24	10392	FBgn0000546	-|
GO:0033993	response to lipid	biological_process	0.57741	1	1	366	24	10392	FBgn0000546	-|
GO:0043401	steroid hormone mediated signaling pathway	biological_process	0.57741	1	1	366	24	10392	FBgn0000546	-|
GO:0048545	response to steroid hormone stimulus	biological_process	0.57741	1	1	366	24	10392	FBgn0000546	-|
GO:0071383	cellular response to steroid hormone stimulus	biological_process	0.57741	1	1	366	24	10392	FBgn0000546	-|
GO:0071396	cellular response to lipid	biological_process	0.57741	1	1	366	24	10392	FBgn0000546	-|
GO:0071407	cellular response to organic cyclic compound	biological_process	0.57741	1	1	366	24	10392	FBgn0000546	-|
GO:0003896	DNA primase activity	molecular_function	0.57746	1	1	366	24	10392	FBgn0001138	-|
GO:0006066	alcohol metabolic process	biological_process	0.57748	1	1	366	24	10392	FBgn0034491	-|
GO:0044770	cell cycle phase transition	biological_process	0.57749	1	1	366	24	10392	FBgn0005655	-|
GO:1901987	regulation of cell cycle phase transition	biological_process	0.57749	1	1	366	24	10392	FBgn0005655	-|
GO:0016866	intramolecular transferase activity	molecular_function	0.57751	1	1	366	24	10392	FBgn0043456	-|
GO:0045226	extracellular polysaccharide biosynthetic process	biological_process	0.57752	1	1	366	24	10392	FBgn0069973	-|
GO:0046379	extracellular polysaccharide metabolic process	biological_process	0.57752	1	1	366	24	10392	FBgn0069973	-|
GO:0030529	ribonucleoprotein complex	cellular_component	0.57997	1	13	366	379	10392	FBgn0031904,FBgn0010411,FBgn0000546,FBgn0263774,FBgn0030616,FBgn0015288,FBgn0260964,FBgn0030617,FBgn0032987,FBgn0029123,FBgn0001983,FBgn0032083,FBgn0011272	-|-|-|-|-|-|-|-|-|-|-|-|-|
GO:0042254	ribosome biogenesis	biological_process	0.58027	1	3	366	85	10392	FBgn0263774,FBgn0263144,FBgn0033072	-|-|-|
GO:0006643	membrane lipid metabolic process	biological_process	0.58028	1	3	366	85	10392	FBgn0034270,FBgn0032172,FBgn0266429	-|-|-|
GO:0015631	tubulin binding	molecular_function	0.58214	1	2	366	55	10392	FBgn0031955,FBgn0003545	-|-|
GO:0042278	purine nucleoside metabolic process	biological_process	0.58223	1	7	366	204	10392	Novel000234,FBgn0050109,FBgn0033834,FBgn0034274,FBgn0028387,FBgn0031941,FBgn0028868	-|-|-|-|-|-|-|
GO:0046128	purine ribonucleoside metabolic process	biological_process	0.58223	1	7	366	204	10392	FBgn0028868,FBgn0031941,FBgn0028387,FBgn0034274,FBgn0033834,FBgn0050109,Novel000234	-|-|-|-|-|-|-|
GO:0007606	sensory perception of chemical stimulus	biological_process	0.58292	1	5	366	145	10392	FBgn0069938,Novel000089,FBgn0041247,FBgn0037546,FBgn0045495	-|-|-|-|-|
GO:0000041	transition metal ion transport	biological_process	0.58835	1	3	366	86	10392	FBgn0265835,FBgn0030610,FBgn0039966	-|-|-|
GO:0000794	condensed nuclear chromosome	cellular_component	0.59223	1	1	366	25	10392	FBgn0005655	-|
GO:0030054	cell junction	cellular_component	0.59231	1	1	366	25	10392	FBgn0263774	-|
GO:0005326	neurotransmitter transporter activity	molecular_function	0.59243	1	1	366	25	10392	FBgn0029663	-|
GO:0005328	neurotransmitter:sodium symporter activity	molecular_function	0.59243	1	1	366	25	10392	FBgn0029663	-|
GO:0016272	prefoldin complex	cellular_component	0.59245	1	1	366	25	10392	FBgn0036918	-|
GO:0060589	nucleoside-triphosphatase regulator activity	molecular_function	0.59503	1	5	366	147	10392	FBgn0025836,FBgn0264895,FBgn0031188,FBgn0014877,FBgn0036921	-|-|-|-|-|
GO:0046488	phosphatidylinositol metabolic process	biological_process	0.59616	1	3	366	87	10392	FBgn0034270,FBgn0032172,FBgn0266429	-|-|-|
GO:0016820	hydrolase activity, acting on acid anhydrides, catalyzing transmembrane movement of substances	molecular_function	0.59622	1	3	366	87	10392	FBgn0010812,FBgn0267727,FBgn0050109	-|-|-|
GO:0050660	flavin adenine dinucleotide binding	molecular_function	0.59623	1	3	366	87	10392	FBgn0034276,FBgn0264895,FBgn0034488	-|-|-|
GO:0033365	protein localization to organelle	biological_process	0.59626	1	3	366	87	10392	FBgn0036920,FBgn0267727,FBgn0086757	-|-|-|
GO:0065007	biological regulation	biological_process	0.59875	1	74	366	2144	10392	FBgn0003475,FBgn0259148,FBgn0000180,FBgn0000535,FBgn0031914,FBgn0016701,FBgn0262519,FBgn0036926,FBgn0036934,FBgn0032184,FBgn0036494,FBgn0037539,FBgn0029657,FBgn0029662,FBgn0031905,FBgn0031196,FBgn0033853,FBgn0034276,FBgn0003016,FBgn0034503,FBgn0030600,FBgn0036929,FBgn0033855,FBgn0264449,FBgn0020880,Novel000042,FBgn0003448,FBgn0264895,FBgn0021764,FBgn0027343,Novel000040,FBgn0033075,FBgn0029531,FBg…	-|-|-|-|-|-|-|-|-|-|-|-|-|-|-|-|-|-|-|-|-|-|-|-|-|-|-|-|-|-|-|-|-|-|-|-|-|-|-|-|-|-|-|-|-|-|-|-|-|-|-|-|-|-|-|-|-|-|-|-|-|-|-|-|-|-|-|-|-|-|-|-|-|-|
GO:0007600	sensory perception	biological_process	0.60121	1	5	366	148	10392	FBgn0041247,Novel000089,FBgn0069938,FBgn0045495,FBgn0037546	-|-|-|-|-|
GO:0000775	chromosome, centromeric region	cellular_component	0.60136	1	2	366	57	10392	FBgn0037539,FBgn0029531	-|-|
GO:1901136	carbohydrate derivative catabolic process	biological_process	0.60158	1	4	366	118	10392	FBgn0043456,FBgn0033856,FBgn0034274,FBgn0033834	-|-|-|-|
GO:0006813	potassium ion transport	biological_process	0.60165	1	2	366	57	10392	FBgn0033856,FBgn0034246	-|-|
GO:0022613	ribonucleoprotein complex biogenesis	biological_process	0.60394	1	3	366	88	10392	FBgn0263144,FBgn0033072,FBgn0263774	-|-|-|
GO:0004177	aminopeptidase activity	molecular_function	0.60624	1	1	366	26	10392	FBgn0033860	-|
GO:0005887	integral to plasma membrane	cellular_component	0.6066	1	1	366	26	10392	FBgn0011584	-|
GO:0031226	intrinsic to plasma membrane	cellular_component	0.6066	1	1	366	26	10392	FBgn0011584	-|
GO:1901615	organic hydroxy compound metabolic process	biological_process	0.60675	1	1	366	26	10392	FBgn0034491	-|
GO:0003006	developmental process involved in reproduction	biological_process	0.60677	1	1	366	26	10392	FBgn0030600	-|
GO:0007596	blood coagulation	biological_process	0.60683	1	1	366	26	10392	FBgn0036929	-|
GO:0016459	myosin complex	cellular_component	0.61043	1	1	366	27	10392	FBgn0002938	-|
GO:0052689	carboxylic ester hydrolase activity	molecular_function	0.61078	1	2	366	58	10392	FBgn0000119,FBgn0032973	-|-|
GO:0044283	small molecule biosynthetic process	biological_process	0.6126	1	6	366	180	10392	FBgn0001099,FBgn0036915,FBgn0028377,FBgn0261800,FBgn0032955,FBgn0025687	-|-|-|-|-|-|
GO:0006399	tRNA metabolic process	biological_process	0.6131	1	7	366	210	10392	FBgn0034276,FBgn0263144,FBgn0261802,FBgn0028868,FBgn0034249,FBgn0037543,FBgn0029664	-|-|-|-|-|-|-|
GO:0016887	ATPase activity	molecular_function	0.61415	1	11	366	329	10392	FBgn0034274,FBgn0051755,FBgn0036497,FBgn0032167,FBgn0028868,FBgn0037549,FBgn0034493,FBgn0034246,FBgn0034496,FBgn0010812,FBgn0050109	-|-|-|-|-|-|-|-|-|-|-|
GO:0015031	protein transport	biological_process	0.61643	1	14	366	418	10392	FBgn0031194,FBgn0086757,FBgn0031905,FBgn0014877,FBgn0021764,FBgn0016975,FBgn0036920,FBgn0034271,FBgn0001138,FBgn0267727,FBgn0003475,FBgn0036928,FBgn0011584,FBgn0016976	-|-|-|-|-|-|-|-|-|-|-|-|-|-|
GO:0045184	establishment of protein localization	biological_process	0.61643	1	14	366	418	10392	FBgn0031194,FBgn0086757,FBgn0031905,FBgn0014877,FBgn0021764,FBgn0016975,FBgn0036920,FBgn0034271,FBgn0001138,FBgn0267727,FBgn0036928,FBgn0003475,FBgn0011584,FBgn0016976	-|-|-|-|-|-|-|-|-|-|-|-|-|-|
GO:0005216	ion channel activity	molecular_function	0.61893	1	9	366	271	10392	FBgn0000535,FBgn0029672,FBgn0027581,FBgn0052792,FBgn0001138,FBgn0266489,FBgn0034246,FBgn0259683,FBgn0034489	-|-|-|-|-|-|-|-|-|
GO:0022838	substrate-specific channel activity	molecular_function	0.61893	1	9	366	271	10392	FBgn0029672,FBgn0000535,FBgn0027581,FBgn0001138,FBgn0052792,FBgn0266489,FBgn0034246,FBgn0259683,FBgn0034489	-|-|-|-|-|-|-|-|-|
GO:0044432	endoplasmic reticulum part	cellular_component	0.61926	1	3	366	90	10392	FBgn0036924,FBgn0266429,FBgn0034277	-|-|-|
GO:0007266	Rho protein signal transduction	biological_process	0.62059	1	1	366	27	10392	FBgn0025836	-|
GO:0035023	regulation of Rho protein signal transduction	biological_process	0.62059	1	1	366	27	10392	FBgn0025836	-|
GO:0071554	cell wall organization or biogenesis	biological_process	0.62068	1	1	366	27	10392	FBgn0020880	-|
GO:0051705	multi-organism behavior	biological_process	0.62069	1	1	366	27	10392	FBgn0032969	-|
GO:0005746	mitochondrial respiratory chain	cellular_component	0.62071	1	1	366	27	10392	FBgn0259683	-|
GO:0006091	generation of precursor metabolites and energy	biological_process	0.62145	1	4	366	121	10392	Novel000089,Novel000234,FBgn0034488,FBgn0259683	-|-|-|-|
GO:0035556	intracellular signal transduction	biological_process	0.62354	1	14	366	420	10392	FBgn0037551,FBgn0024556,FBgn0262519,FBgn0031906,FBgn0039966,FBgn0036932,FBgn0025836,FBgn0011584,FBgn0036497,FBgn0003475,FBgn0023416,FBgn0016701,FBgn0264895,FBgn0004852	-|-|-|-|-|-|-|-|-|-|-|-|-|-|
GO:0016788	hydrolase activity, acting on ester bonds	molecular_function	0.62371	1	16	366	479	10392	FBgn0243512,FBgn0031187,FBgn0032973,FBgn0000119,FBgn0027279,FBgn0029667,FBgn0029123,FBgn0031952,FBgn0052984,FBgn0034491,FBgn0034249,FBgn0033836,FBgn0004638,FBgn0052985,FBgn0034246,FBgn0260475	-|-|-|-|-|-|-|-|-|-|-|-|-|-|-|-|
GO:0044764	multi-organism cellular process	biological_process	0.62372	1	12	366	361	10392	FBgn0261802,FBgn0261571,FBgn0033072,FBgn0025836,FBgn0260764,FBgn0031910,FBgn0013746,FBgn0004638,FBgn0261574,FBgn0050431,FBgn0036929,FBgn0028868	-|-|-|-|-|-|-|-|-|-|-|-|
GO:0016874	ligase activity	molecular_function	0.62381	1	12	366	361	10392	FBgn0032974,FBgn0029664,FBgn0001099,FBgn0034483,Novel000089,FBgn0261802,FBgn0036494,FBgn0029006,FBgn0037548,FBgn0028868,FBgn0028377,FBgn0037547	-|-|-|-|-|-|-|-|-|-|-|-|
GO:0022836	gated channel activity	molecular_function	0.62393	1	5	366	152	10392	FBgn0034246,FBgn0266489,FBgn0001138,FBgn0027581,FBgn0259683	-|-|-|-|-|
GO:0022839	ion gated channel activity	molecular_function	0.62393	1	5	366	152	10392	FBgn0266489,FBgn0034246,FBgn0001138,FBgn0027581,FBgn0259683	-|-|-|-|-|
GO:0005578	proteinaceous extracellular matrix	cellular_component	0.6268	1	3	366	91	10392	FBgn0013303,FBgn0040805,FBgn0036926	-|-|-|
GO:0015267	channel activity	molecular_function	0.62772	1	9	366	273	10392	FBgn0027581,FBgn0029672,FBgn0000535,FBgn0034489,FBgn0259683,FBgn0034246,FBgn0266489,FBgn0001138,FBgn0052792	-|-|-|-|-|-|-|-|-|
GO:0022803	passive transmembrane transporter activity	molecular_function	0.62772	1	9	366	273	10392	FBgn0034489,FBgn0259683,FBgn0034246,FBgn0266489,FBgn0052792,FBgn0001138,FBgn0027581,FBgn0000535,FBgn0029672	-|-|-|-|-|-|-|-|-|
GO:0048519	negative regulation of biological process	biological_process	0.62784	1	4	366	122	10392	FBgn0005655,FBgn0013746,FBgn0033075,FBgn0031906	-|-|-|-|
GO:0046983	protein dimerization activity	molecular_function	0.62786	1	4	366	122	10392	FBgn0031914,FBgn0030613,FBgn0022740,FBgn0014877	-|-|-|-|
GO:0016591	DNA-directed RNA polymerase II, holoenzyme	cellular_component	0.62786	1	4	366	122	10392	FBgn0053870,FBgn0053869,FBgn0053872,FBgn0053868	-|-|-|-|
GO:0051213	dioxygenase activity	molecular_function	0.62975	1	2	366	60	10392	FBgn0034246,FBgn0005655	-|-|
GO:0008276	protein methyltransferase activity	molecular_function	0.62975	1	2	366	60	10392	FBgn0263144,FBgn0037543	-|-|
GO:0003676	nucleic acid binding	molecular_function	0.63319	1	65	366	1904	10392	FBgn0028979,FBgn0016701,FBgn0037549,FBgn0052791,FBgn0053866,Novel000089,FBgn0051702,FBgn0262519,FBgn0002524,FBgn0053864,FBgn0031195,FBgn0037539,FBgn0053857,FBgn0029657,FBgn0053859,FBgn0043456,FBgn0029666,FBgn0034246,FBgn0015664,FBgn0031196,FBgn0034258,FBgn0033855,FBgn0051755,FBgn0030612,Novel000042,FBgn0030607,FBgn0053868,FBgn0030600,FBgn0029128,FBgn0051703,FBgn0053865,FBgn0053870,FBgn0036919,FBg…	-|-|-|-|-|-|-|-|-|-|-|-|-|-|-|-|-|-|-|-|-|-|-|-|-|-|-|-|-|-|-|-|-|-|-|-|-|-|-|-|-|-|-|-|-|-|-|-|-|-|-|-|-|-|-|-|-|-|-|-|-|-|-|-|-|
GO:0004806	triglyceride lipase activity	molecular_function	0.63353	1	1	366	28	10392	FBgn0032973	-|
GO:0016796	exonuclease activity, active with either ribo- or deoxyribonucleic acids and producing 5'-phosphomonoesters	molecular_function	0.63374	1	1	366	28	10392	FBgn0029123	-|
GO:0005088	Ras guanyl-nucleotide exchange factor activity	molecular_function	0.63399	1	1	366	28	10392	FBgn0025836	-|
GO:0005089	Rho guanyl-nucleotide exchange factor activity	molecular_function	0.63399	1	1	366	28	10392	FBgn0025836	-|
GO:0003707	steroid hormone receptor activity	molecular_function	0.634	1	1	366	28	10392	FBgn0000546	-|
GO:0030430	host cell cytoplasm	cellular_component	0.63407	1	1	366	28	10392	FBgn0013746	-|
GO:0000154	rRNA modification	biological_process	0.63408	1	1	366	28	10392	FBgn0263144	-|
GO:0070469	respiratory chain	cellular_component	0.63411	1	1	366	28	10392	FBgn0259683	-|
GO:0008643	carbohydrate transport	biological_process	0.63411	1	1	366	28	10392	FBgn0039946	-|
GO:0030234	enzyme regulator activity	molecular_function	0.63418	1	11	366	334	10392	FBgn0260764,FBgn0261567,FBgn0036921,FBgn0014877,FBgn0031188,FBgn0261630,FBgn0026136,FBgn0025836,FBgn0034480,FBgn0003448,FBgn0264895	-|-|-|-|-|-|-|-|-|-|-|
GO:0016881	acid-amino acid ligase activity	molecular_function	0.63632	1	5	366	154	10392	Novel000089,FBgn0036494,FBgn0029006,FBgn0032974,FBgn0034483	-|-|-|-|-|
GO:0009119	ribonucleoside metabolic process	biological_process	0.63768	1	7	366	215	10392	FBgn0050109,Novel000234,FBgn0033834,FBgn0034274,FBgn0028387,FBgn0031941,FBgn0028868	-|-|-|-|-|-|-|
GO:0009892	negative regulation of metabolic process	biological_process	0.63869	1	2	366	61	10392	FBgn0013746,FBgn0031906	-|-|
GO:0043414	macromolecule methylation	biological_process	0.63873	1	2	366	61	10392	FBgn0263144,FBgn0037543	-|-|
GO:0000428	DNA-directed RNA polymerase complex	cellular_component	0.64061	1	4	366	124	10392	FBgn0053868,FBgn0053872,FBgn0053869,FBgn0053870	-|-|-|-|
GO:0030880	RNA polymerase complex	cellular_component	0.64061	1	4	366	124	10392	FBgn0053870,FBgn0053868,FBgn0053872,FBgn0053869	-|-|-|-|
GO:0055029	nuclear DNA-directed RNA polymerase complex	cellular_component	0.64061	1	4	366	124	10392	FBgn0053868,FBgn0053869,FBgn0053872,FBgn0053870	-|-|-|-|
GO:0097367	carbohydrate derivative binding	molecular_function	0.64065	1	4	366	124	10392	FBgn0027600,FBgn0034261,FBgn0029657,FBgn0052499	-|-|-|-|
GO:0005083	small GTPase regulator activity	molecular_function	0.6414	1	3	366	93	10392	FBgn0036921,FBgn0025836,FBgn0031188	-|-|-|
GO:0050909	sensory perception of taste	biological_process	0.64151	1	3	366	93	10392	FBgn0045495,FBgn0069938,FBgn0041247	-|-|-|
GO:0016032	viral process	biological_process	0.64193	1	11	366	336	10392	FBgn0261571,FBgn0261802,FBgn0025836,FBgn0013746,FBgn0031910,FBgn0260764,FBgn0004638,FBgn0261574,FBgn0050431,FBgn0028868,FBgn0036929	-|-|-|-|-|-|-|-|-|-|-|
GO:0009755	hormone-mediated signaling pathway	biological_process	0.64686	1	1	366	29	10392	FBgn0000546	-|
GO:0032870	cellular response to hormone stimulus	biological_process	0.64686	1	1	366	29	10392	FBgn0000546	-|
GO:0005267	potassium channel activity	molecular_function	0.64696	1	1	366	29	10392	FBgn0034246	-|
GO:0009896	positive regulation of catabolic process	biological_process	0.64704	1	1	366	29	10392	FBgn0031196	-|
GO:0010508	positive regulation of autophagy	biological_process	0.64704	1	1	366	29	10392	FBgn0031196	-|
GO:0031331	positive regulation of cellular catabolic process	biological_process	0.64704	1	1	366	29	10392	FBgn0031196	-|
GO:0006364	rRNA processing	biological_process	0.64755	1	2	366	62	10392	FBgn0263144,FBgn0033072	-|-|
GO:0016072	rRNA metabolic process	biological_process	0.64755	1	2	366	62	10392	FBgn0033072,FBgn0263144	-|-|
GO:0006914	autophagy	biological_process	0.64758	1	2	366	62	10392	FBgn0031196,FBgn0031910	-|-|
GO:0006650	glycerophospholipid metabolic process	biological_process	0.64858	1	3	366	94	10392	FBgn0032172,FBgn0034270,FBgn0266429	-|-|-|
GO:0022857	transmembrane transporter activity	molecular_function	0.64965	1	33	366	986	10392	FBgn0034275,FBgn0036928,FBgn0265835,FBgn0034245,FBgn0259683,FBgn0034479,FBgn0031959,FBgn0034490,FBgn0050109,FBgn0051693,FBgn0028387,FBgn0261566,FBgn0261507,FBgn0029672,FBgn0030617,FBgn0037541,FBgn0039946,FBgn0010812,FBgn0001138,FBgn0029663,FBgn0034247,Novel000234,FBgn0266489,FBgn0034246,FBgn0027581,FBgn0032988,FBgn0000535,FBgn0031941,FBgn0031194,FBgn0034489,FBgn0267727,FBgn0052792,FBgn0039966	-|-|-|-|-|-|-|-|-|-|-|-|-|-|-|-|-|-|-|-|-|-|-|-|-|-|-|-|-|-|-|-|-|
GO:0005215	transporter activity	molecular_function	0.65069	1	37	366	1103	10392	FBgn0031941,FBgn0031194,FBgn0262867,FBgn0034489,FBgn0039966,FBgn0267727,FBgn0052792,FBgn0027581,FBgn0032988,FBgn0000535,FBgn0000180,FBgn0034246,FBgn0266489,Novel000234,FBgn0029663,FBgn0034247,FBgn0011584,FBgn0001138,FBgn0010812,FBgn0261566,FBgn0261507,FBgn0028387,FBgn0051693,FBgn0029672,FBgn0037541,FBgn0030617,FBgn0039946,FBgn0259683,FBgn0031959,FBgn0034479,FBgn0050109,FBgn0034490,FBgn0034275,FBg…	-|-|-|-|-|-|-|-|-|-|-|-|-|-|-|-|-|-|-|-|-|-|-|-|-|-|-|-|-|-|-|-|-|-|-|-|-|
GO:0051649	establishment of localization in cell	biological_process	0.65166	1	14	366	428	10392	FBgn0014877,FBgn0031905,FBgn0021764,FBgn0086757,FBgn0031194,FBgn0267727,FBgn0001138,FBgn0034271,FBgn0036920,FBgn0016975,FBgn0040099,FBgn0036928,FBgn0003475,FBgn0016976	-|-|-|-|-|-|-|-|-|-|-|-|-|-|
GO:0003779	actin binding	molecular_function	0.65297	1	4	366	126	10392	FBgn0051619,FBgn0031187,FBgn0052791,FBgn0003475	-|-|-|-|
GO:0030695	GTPase regulator activity	molecular_function	0.65302	1	4	366	126	10392	FBgn0025836,FBgn0031188,FBgn0264895,FBgn0036921	-|-|-|-|
GO:0044711	single-organism biosynthetic process	biological_process	0.65456	1	6	366	188	10392	FBgn0028377,FBgn0032955,FBgn0261800,FBgn0025687,FBgn0036915,FBgn0001099	-|-|-|-|-|-|
GO:0033646	host intracellular part	cellular_component	0.65617	1	2	366	63	10392	FBgn0013746,FBgn0261574	-|-|
GO:0043656	intracellular region of host	cellular_component	0.65617	1	2	366	63	10392	FBgn0261574,FBgn0013746	-|-|
GO:0015144	carbohydrate transmembrane transporter activity	molecular_function	0.65942	1	1	366	30	10392	FBgn0039946	-|
GO:1901476	carbohydrate transporter activity	molecular_function	0.65942	1	1	366	30	10392	FBgn0039946	-|
GO:0006606	protein import into nucleus	biological_process	0.65947	1	1	366	30	10392	FBgn0267727	-|
GO:0034504	protein localization to nucleus	biological_process	0.65947	1	1	366	30	10392	FBgn0267727	-|
GO:0044744	protein targeting to nucleus	biological_process	0.65947	1	1	366	30	10392	FBgn0267727	-|
GO:0051170	nuclear import	biological_process	0.65947	1	1	366	30	10392	FBgn0267727	-|
GO:0048646	anatomical structure formation involved in morphogenesis	biological_process	0.65948	1	1	366	30	10392	FBgn0033074	-|
GO:0006836	neurotransmitter transport	biological_process	0.65949	1	1	366	30	10392	FBgn0029663	-|
GO:0070925	organelle assembly	biological_process	0.65949	1	1	366	30	10392	FBgn0004228	-|
GO:0072528	pyrimidine-containing compound biosynthetic process	biological_process	0.6595	1	1	366	30	10392	FBgn0036915	-|
GO:0019080	viral genome expression	biological_process	0.6595	1	1	366	30	10392	FBgn0050431	-|
GO:0010506	regulation of autophagy	biological_process	0.6595	1	1	366	30	10392	FBgn0031196	-|
GO:0034654	nucleobase-containing compound biosynthetic process	biological_process	0.662	1	47	366	1399	10392	Novel000040,FBgn0263994,FBgn0021764,FBgn0051703,FBgn0001138,FBgn0036916,FBgn0023416,FBgn0030600,FBgn0053868,FBgn0034503,FBgn0028387,FBgn0003016,Novel000042,FBgn0053871,FBgn0033855,FBgn0000546,FBgn0034265,FBgn0037546,FBgn0053121,FBgn0050109,FBgn0029531,FBgn0028868,FBgn0053869,FBgn0053872,FBgn0022740,FBgn0053870,FBgn0034274,FBgn0031941,FBgn0262519,FBgn0051702,FBgn0031904,FBgn0032184,FBgn0030613,FBg…	-|-|-|-|-|-|-|-|-|-|-|-|-|-|-|-|-|-|-|-|-|-|-|-|-|-|-|-|-|-|-|-|-|-|-|-|-|-|-|-|-|-|-|-|-|-|-|
GO:0044459	plasma membrane part	cellular_component	0.66449	1	2	366	64	10392	FBgn0050431,FBgn0011584	-|-|
GO:0004553	hydrolase activity, hydrolyzing O-glycosyl compounds	molecular_function	0.666	1	6	366	191	10392	Novel000234,FBgn0034271,FBgn0027600,FBgn0033856,FBgn0004228,FBgn0031959	-|-|-|-|-|-|
GO:0051641	cellular localization	biological_process	0.669	1	15	366	463	10392	FBgn0267727,FBgn0001138,FBgn0034271,FBgn0036920,FBgn0036932,FBgn0016975,FBgn0014877,FBgn0021764,FBgn0031905,FBgn0031194,FBgn0086757,FBgn0016976,FBgn0040099,FBgn0036928,FBgn0003475	-|-|-|-|-|-|-|-|-|-|-|-|-|-|-|
GO:0051536	iron-sulfur cluster binding	molecular_function	0.66949	1	3	366	97	10392	FBgn0033836,FBgn0260475,FBgn0034251	-|-|-|
GO:0051540	metal cluster binding	molecular_function	0.66949	1	3	366	97	10392	FBgn0260475,FBgn0034251,FBgn0033836	-|-|-|
GO:0046486	glycerolipid metabolic process	biological_process	0.66951	1	3	366	97	10392	FBgn0266429,FBgn0032172,FBgn0034270	-|-|-|
GO:0050877	neurological system process	biological_process	0.66958	1	5	366	160	10392	FBgn0045495,FBgn0037546,FBgn0041247,FBgn0069938,Novel000089	-|-|-|-|-|
GO:0030414	peptidase inhibitor activity	molecular_function	0.66962	1	3	366	97	10392	FBgn0261567,FBgn0034480,FBgn0261630	-|-|-|
GO:0061134	peptidase regulator activity	molecular_function	0.66962	1	3	366	97	10392	FBgn0261567,FBgn0034480,FBgn0261630	-|-|-|
GO:0000793	condensed chromosome	cellular_component	0.67136	1	1	366	31	10392	FBgn0005655	-|
GO:0030031	cell projection assembly	biological_process	0.67149	1	1	366	31	10392	FBgn0029664	-|
GO:0006304	DNA modification	biological_process	0.67152	1	1	366	31	10392	FBgn0037543	-|
GO:0071705	nitrogen compound transport	biological_process	0.67297	1	2	366	65	10392	FBgn0001983,FBgn0030617	-|-|
GO:0042626	ATPase activity, coupled to transmembrane movement of substances	molecular_function	0.67298	1	2	366	65	10392	FBgn0010812,FBgn0050109	-|-|
GO:0043492	ATPase activity, coupled to movement of substances	molecular_function	0.67298	1	2	366	65	10392	FBgn0050109,FBgn0010812	-|-|
GO:0005102	receptor binding	molecular_function	0.67672	1	8	366	254	10392	FBgn0031902,FBgn0085450,FBgn0034279,FBgn0034261,FBgn0036929,FBgn0011705,FBgn0031903,FBgn0004009	-|-|-|-|-|-|-|-|
GO:0042578	phosphoric ester hydrolase activity	molecular_function	0.67698	1	4	366	130	10392	FBgn0027279,FBgn0029667,FBgn0031952,FBgn0243512	-|-|-|-|
GO:0019899	enzyme binding	molecular_function	0.68115	1	2	366	66	10392	FBgn0003475,FBgn0032956	-|-|
GO:0016410	N-acyltransferase activity	molecular_function	0.68117	1	2	366	66	10392	FBgn0034489,FBgn0033065	-|-|
GO:0005667	transcription factor complex	cellular_component	0.68292	1	4	366	131	10392	FBgn0053870,FBgn0053872,FBgn0053869,FBgn0053868	-|-|-|-|
GO:0009306	protein secretion	biological_process	0.68306	1	1	366	32	10392	FBgn0001138	-|
GO:0004221	ubiquitin thiolesterase activity	molecular_function	0.68313	1	1	366	32	10392	FBgn0031187	-|
GO:0046085	adenosine metabolic process	biological_process	0.68313	1	1	366	32	10392	FBgn0028868	-|
GO:0070525	threonylcarbamoyladenosine metabolic process	biological_process	0.68313	1	1	366	32	10392	FBgn0028868	-|
GO:0070526	threonylcarbamoyladenosine biosynthetic process	biological_process	0.68313	1	1	366	32	10392	FBgn0028868	-|
GO:0044262	cellular carbohydrate metabolic process	biological_process	0.68533	1	5	366	163	10392	FBgn0031907,FBgn0262866,FBgn0031908,FBgn0069973,FBgn0052220	-|-|-|-|-|
GO:0071702	organic substance transport	biological_process	0.68573	1	18	366	558	10392	FBgn0036928,FBgn0001983,FBgn0011584,FBgn0031905,FBgn0014877,FBgn0034271,FBgn0003475,FBgn0039946,FBgn0037541,FBgn0030617,FBgn0016976,FBgn0031194,FBgn0086757,FBgn0021764,FBgn0016975,FBgn0036920,FBgn0267727,FBgn0001138	-|-|-|-|-|-|-|-|-|-|-|-|-|-|-|-|-|-|
GO:0006511	ubiquitin-dependent protein catabolic process	biological_process	0.68961	1	3	366	100	10392	FBgn0031187,FBgn0025720,FBgn0032956	-|-|-|
GO:0019941	modification-dependent protein catabolic process	biological_process	0.68961	1	3	366	100	10392	FBgn0032956,FBgn0025720,FBgn0031187	-|-|-|
GO:0043632	modification-dependent macromolecule catabolic process	biological_process	0.68961	1	3	366	100	10392	FBgn0032956,FBgn0025720,FBgn0031187	-|-|-|
GO:0000166	nucleotide binding	molecular_function	0.69146	1	43	366	1298	10392	FBgn0031906,FBgn0034496,FBgn0037551,FBgn0000633,FBgn0033856,FBgn0034274,FBgn0085569,FBgn0028868,FBgn0025687,FBgn0003545,FBgn0029006,FBgn0024556,FBgn0033842,FBgn0051755,FBgn0264895,FBgn0030612,FBgn0261802,FBgn0043456,FBgn0031957,FBgn0266489,FBgn0034246,FBgn0002938,FBgn0034276,FBgn0031955,FBgn0014877,FBgn0029664,FBgn0029123,FBgn0034493,FBgn0040099,FBgn0032167,FBgn0000559,FBgn0039966,FBgn0036931,FBg…	-|-|-|-|-|-|-|-|-|-|-|-|-|-|-|-|-|-|-|-|-|-|-|-|-|-|-|-|-|-|-|-|-|-|-|-|-|-|-|-|-|-|-|
GO:1901265	nucleoside phosphate binding	molecular_function	0.69146	1	43	366	1298	10392	FBgn0034274,FBgn0033856,FBgn0028868,FBgn0085569,FBgn0034496,FBgn0031906,FBgn0037551,FBgn0000633,FBgn0030612,FBgn0264895,FBgn0051755,FBgn0029006,FBgn0003545,FBgn0025687,FBgn0033842,FBgn0024556,FBgn0032167,FBgn0040099,FBgn0034493,FBgn0029123,FBgn0034276,FBgn0002938,FBgn0266489,FBgn0034246,FBgn0031957,FBgn0043456,FBgn0261802,FBgn0029664,FBgn0014877,FBgn0031955,FBgn0259221,FBgn0016701,FBgn0028377,FBg…	-|-|-|-|-|-|-|-|-|-|-|-|-|-|-|-|-|-|-|-|-|-|-|-|-|-|-|-|-|-|-|-|-|-|-|-|-|-|-|-|-|-|-|
GO:0034660	ncRNA metabolic process	biological_process	0.69359	1	8	366	258	10392	FBgn0028868,FBgn0037543,FBgn0033072,FBgn0034276,FBgn0263144,FBgn0261802,FBgn0034249,FBgn0029664	-|-|-|-|-|-|-|-|
GO:0055085	transmembrane transport	biological_process	0.69417	1	23	366	710	10392	FBgn0261507,FBgn0051693,FBgn0028387,FBgn0000535,FBgn0039946,FBgn0030617,FBgn0031941,FBgn0265767,FBgn0267727,FBgn0010812,FBgn0034247,FBgn0040031,FBgn0034494,FBgn0265835,FBgn0086368,FBgn0260964,FBgn0033074,FBgn0039941,FBgn0034479,FBgn0031959,Novel000234,FBgn0034490,FBgn0050109	-|-|-|-|-|-|-|-|-|-|-|-|-|-|-|-|-|-|-|-|-|-|-|
GO:0042803	protein homodimerization activity	molecular_function	0.69427	1	1	366	33	10392	FBgn0014877	-|
GO:0007218	neuropeptide signaling pathway	biological_process	0.69428	1	1	366	33	10392	FBgn0261571	-|
GO:0016628	oxidoreductase activity, acting on the CH-CH group of donors, NAD or NADP as acceptor	molecular_function	0.69433	1	1	366	33	10392	FBgn0025687	-|
GO:0034613	cellular protein localization	biological_process	0.69784	1	11	366	351	10392	FBgn0016976,FBgn0036928,FBgn0003475,FBgn0036920,FBgn0016975,FBgn0267727,FBgn0031194,FBgn0086757,FBgn0021764,FBgn0014877,FBgn0031905	-|-|-|-|-|-|-|-|-|-|-|
GO:0070727	cellular macromolecule localization	biological_process	0.69784	1	11	366	351	10392	FBgn0016976,FBgn0036928,FBgn0003475,FBgn0036920,FBgn0016975,FBgn0267727,FBgn0086757,FBgn0031194,FBgn0021764,FBgn0014877,FBgn0031905	-|-|-|-|-|-|-|-|-|-|-|
GO:0004888	transmembrane signaling receptor activity	molecular_function	0.69972	1	10	366	321	10392	FBgn0050106,FBgn0265002,FBgn0266429,FBgn0013765,FBgn0262867,FBgn0036934,FBgn0037546,FBgn0259683,FBgn0052843,Novel000089	-|-|-|-|-|-|-|-|-|-|
GO:0046907	intracellular transport	biological_process	0.69986	1	12	366	382	10392	FBgn0016976,FBgn0036928,FBgn0003475,FBgn0040099,FBgn0036920,FBgn0016975,FBgn0267727,FBgn0086757,FBgn0031194,FBgn0021764,FBgn0014877,FBgn0031905	-|-|-|-|-|-|-|-|-|-|-|-|
GO:0044765	single-organism transport	biological_process	0.70256	1	43	366	1303	10392	FBgn0265835,FBgn0033856,FBgn0260964,FBgn0086368,FBgn0034494,FBgn0036928,FBgn0040031,FBgn0034275,FBgn0051835,FBgn0034490,FBgn0050109,FBgn0031959,FBgn0034479,FBgn0039946,FBgn0030617,FBgn0029672,FBgn0037541,FBgn0028387,FBgn0051693,FBgn0261507,FBgn0001138,FBgn0010812,FBgn0036920,FBgn0086757,FBgn0001983,FBgn0040099,FBgn0034247,FBgn0029663,Novel000234,FBgn0034271,FBgn0034246,FBgn0039941,FBgn0033074,FBg…	-|-|-|-|-|-|-|-|-|-|-|-|-|-|-|-|-|-|-|-|-|-|-|-|-|-|-|-|-|-|-|-|-|-|-|-|-|-|-|-|-|-|-|
GO:0000988	protein binding transcription factor activity	molecular_function	0.70289	1	6	366	198	10392	FBgn0034265,FBgn0036916,FBgn0003016,FBgn0034503,FBgn0032184,FBgn0033855	-|-|-|-|-|-|
GO:0034645	cellular macromolecule biosynthetic process	biological_process	0.70437	1	66	366	1974	10392	FBgn0044872,FBgn0052220,FBgn0029123,FBgn0001983,FBgn0037539,FBgn0029657,FBgn0031196,FBgn0034277,FBgn0034258,FBgn0031905,FBgn0000535,Novel000089,FBgn0032184,FBgn0051702,FBgn0262519,FBgn0053870,FBgn0011272,FBgn0029531,FBgn0053121,FBgn0037546,FBgn0030616,FBgn0000546,FBgn0034265,FBgn0033855,Novel000042,FBgn0030612,FBgn0053868,FBgn0034503,FBgn0030600,FBgn0032168,FBgn0003016,FBgn0051703,FBgn0021764,Nov…	-|-|-|-|-|-|-|-|-|-|-|-|-|-|-|-|-|-|-|-|-|-|-|-|-|-|-|-|-|-|-|-|-|-|-|-|-|-|-|-|-|-|-|-|-|-|-|-|-|-|-|-|-|-|-|-|-|-|-|-|-|-|-|-|-|-|
GO:0005096	GTPase activator activity	molecular_function	0.70456	1	2	366	69	10392	FBgn0264895,FBgn0031188	-|-|
GO:0008135	translation factor activity, nucleic acid binding	molecular_function	0.7046	1	2	366	69	10392	FBgn0034258,FBgn0001138	-|-|
GO:0072511	divalent inorganic cation transport	biological_process	0.7046	1	2	366	69	10392	FBgn0039966,FBgn0265835	-|-|
GO:0007610	behavior	biological_process	0.70509	1	1	366	34	10392	FBgn0032969	-|
GO:0010564	regulation of cell cycle process	biological_process	0.70511	1	1	366	34	10392	FBgn0005655	-|
GO:0005099	Ras GTPase activator activity	molecular_function	0.70512	1	1	366	34	10392	FBgn0031188	-|
GO:1901566	organonitrogen compound biosynthetic process	biological_process	0.70512	1	13	366	414	10392	FBgn0028387,FBgn0023416,FBgn0028868,FBgn0261800,FBgn0034274,FBgn0004852,FBgn0053156,FBgn0036915,FBgn0031941,FBgn0033853,FBgn0050109,Novel000234,FBgn0025687	-|-|-|-|-|-|-|-|-|-|-|-|-|
GO:0016620	oxidoreductase activity, acting on the aldehyde or oxo group of donors, NAD or NADP as acceptor	molecular_function	0.70513	1	1	366	34	10392	FBgn0025687	-|
GO:0044445	cytosolic part	cellular_component	0.70514	1	1	366	34	10392	FBgn0036918	-|
GO:0009055	electron carrier activity	molecular_function	0.70869	1	3	366	103	10392	FBgn0000535,FBgn0034245,FBgn0029662	-|-|-|
GO:0003008	system process	biological_process	0.71066	1	5	366	168	10392	FBgn0037546,FBgn0045495,FBgn0069938,Novel000089,FBgn0041247	-|-|-|-|-|
GO:0044248	cellular catabolic process	biological_process	0.71172	1	11	366	355	10392	FBgn0033834,FBgn0031187,FBgn0030612,FBgn0034274,FBgn0005655,FBgn0027572,FBgn0034276,FBgn0025720,FBgn0031196,FBgn0032956,FBgn0031910	-|-|-|-|-|-|-|-|-|-|-|
GO:1901607	alpha-amino acid biosynthetic process	biological_process	0.71204	1	2	366	70	10392	FBgn0261800,FBgn0025687	-|-|
GO:0004674	protein serine/threonine kinase activity	molecular_function	0.71209	1	2	366	70	10392	FBgn0262866,FBgn0031951	-|-|
GO:0034061	DNA polymerase activity	molecular_function	0.71211	1	2	366	70	10392	Novel000211,Novel000089	-|-|
GO:0016798	hydrolase activity, acting on glycosyl bonds	molecular_function	0.71325	1	6	366	201	10392	FBgn0031959,FBgn0034271,Novel000234,FBgn0027600,FBgn0033856,FBgn0004228	-|-|-|-|-|-|
GO:0048518	positive regulation of biological process	biological_process	0.71483	1	3	366	104	10392	FBgn0036932,FBgn0031904,FBgn0031196	-|-|-|
GO:0048522	positive regulation of cellular process	biological_process	0.71483	1	3	366	104	10392	FBgn0031196,FBgn0031904,FBgn0036932	-|-|-|
GO:0016108	tetraterpenoid metabolic process	biological_process	0.71555	1	1	366	35	10392	FBgn0034276	-|
GO:0016109	tetraterpenoid biosynthetic process	biological_process	0.71555	1	1	366	35	10392	FBgn0034276	-|
GO:0016116	carotenoid metabolic process	biological_process	0.71555	1	1	366	35	10392	FBgn0034276	-|
GO:0016117	carotenoid biosynthetic process	biological_process	0.71555	1	1	366	35	10392	FBgn0034276	-|
GO:0015035	protein disulfide oxidoreductase activity	molecular_function	0.71555	1	1	366	35	10392	FBgn0029662	-|
GO:0015036	disulfide oxidoreductase activity	molecular_function	0.71555	1	1	366	35	10392	FBgn0029662	-|
GO:0005829	cytosol	cellular_component	0.71556	1	1	366	35	10392	FBgn0036918	-|
GO:0010467	gene expression	biological_process	0.71581	1	65	366	1952	10392	FBgn0261802,FBgn0034276,FBgn0034246,FBgn0031905,FBgn0031196,FBgn0034258,FBgn0036924,FBgn0052220,FBgn0001983,FBgn0037539,FBgn0029123,FBgn0029657,FBgn0032184,FBgn0262519,FBgn0051702,FBgn0000535,FBgn0033859,FBgn0052791,FBgn0053121,FBgn0030616,FBgn0037546,FBgn0034265,FBgn0000546,FBgn0053870,FBgn0011272,FBgn0029531,FBgn0051703,FBgn0021764,Novel000040,FBgn0033855,Novel000042,FBgn0032168,FBgn0003016,FBg…	-|-|-|-|-|-|-|-|-|-|-|-|-|-|-|-|-|-|-|-|-|-|-|-|-|-|-|-|-|-|-|-|-|-|-|-|-|-|-|-|-|-|-|-|-|-|-|-|-|-|-|-|-|-|-|-|-|-|-|-|-|-|-|-|-|
GO:0005975	carbohydrate metabolic process	biological_process	0.71716	1	17	366	539	10392	FBgn0031907,FBgn0040099,FBgn0052220,FBgn0033856,FBgn0086368,FBgn0027600,FBgn0044872,FBgn0259683,FBgn0034277,FBgn0263144,FBgn0031957,FBgn0043456,FBgn0034271,FBgn0069973,FBgn0031908,FBgn0262866,FBgn0029006	-|-|-|-|-|-|-|-|-|-|-|-|-|-|-|-|-|
GO:0009116	nucleoside metabolic process	biological_process	0.71865	1	7	366	233	10392	FBgn0028387,FBgn0031941,FBgn0028868,FBgn0050109,Novel000234,FBgn0033834,FBgn0034274	-|-|-|-|-|-|-|
GO:0015399	primary active transmembrane transporter activity	molecular_function	0.71941	1	2	366	71	10392	FBgn0050109,FBgn0010812	-|-|
GO:0015405	P-P-bond-hydrolysis-driven transmembrane transporter activity	molecular_function	0.71941	1	2	366	71	10392	FBgn0050109,FBgn0010812	-|-|
GO:0008104	protein localization	biological_process	0.71967	1	14	366	449	10392	FBgn0036928,FBgn0003475,FBgn0011584,FBgn0016976,FBgn0031194,FBgn0086757,FBgn0021764,FBgn0031905,FBgn0014877,FBgn0036920,FBgn0016975,FBgn0267727,FBgn0001138,FBgn0034271	-|-|-|-|-|-|-|-|-|-|-|-|-|-|
GO:1901657	glycosyl compound metabolic process	biological_process	0.72277	1	7	366	234	10392	FBgn0031941,FBgn0028868,FBgn0028387,FBgn0033834,FBgn0034274,Novel000234,FBgn0050109	-|-|-|-|-|-|-|
GO:0051188	cofactor biosynthetic process	biological_process	0.72504	1	5	366	171	10392	FBgn0032981,FBgn0033853,FBgn0028868,FBgn0261800,FBgn0053156	-|-|-|-|-|
GO:0005783	endoplasmic reticulum	cellular_component	0.72504	1	5	366	171	10392	FBgn0034277,FBgn0014877,FBgn0266429,FBgn0036924,FBgn0034261	-|-|-|-|-|
GO:0042398	cellular modified amino acid biosynthetic process	biological_process	0.72557	1	1	366	36	10392	FBgn0261800	-|
GO:0004536	deoxyribonuclease activity	molecular_function	0.7256	1	1	366	36	10392	FBgn0029123	-|
GO:0003724	RNA helicase activity	molecular_function	0.72658	1	2	366	72	10392	FBgn0028868,FBgn0036497	-|-|
GO:0031012	extracellular matrix	cellular_component	0.73271	1	3	366	107	10392	FBgn0036926,FBgn0040805,FBgn0013303	-|-|-|
GO:0006152	purine nucleoside catabolic process	biological_process	0.73361	1	2	366	73	10392	FBgn0034274,FBgn0033834	-|-|
GO:0009143	nucleoside triphosphate catabolic process	biological_process	0.73361	1	2	366	73	10392	FBgn0033834,FBgn0034274	-|-|
GO:0009146	purine nucleoside triphosphate catabolic process	biological_process	0.73361	1	2	366	73	10392	FBgn0034274,FBgn0033834	-|-|
GO:0009154	purine ribonucleotide catabolic process	biological_process	0.73361	1	2	366	73	10392	FBgn0033834,FBgn0034274	-|-|
GO:0009203	ribonucleoside triphosphate catabolic process	biological_process	0.73361	1	2	366	73	10392	FBgn0033834,FBgn0034274	-|-|
GO:0009207	purine ribonucleoside triphosphate catabolic process	biological_process	0.73361	1	2	366	73	10392	FBgn0034274,FBgn0033834	-|-|
GO:0009261	ribonucleotide catabolic process	biological_process	0.73361	1	2	366	73	10392	FBgn0033834,FBgn0034274	-|-|
GO:0046130	purine ribonucleoside catabolic process	biological_process	0.73361	1	2	366	73	10392	FBgn0033834,FBgn0034274	-|-|
GO:0016627	oxidoreductase activity, acting on the CH-CH group of donors	molecular_function	0.73364	1	2	366	73	10392	FBgn0025687,FBgn0027572	-|-|
GO:0005509	calcium ion binding	molecular_function	0.73386	1	6	366	205	10392	FBgn0001138,FBgn0261574,FBgn0040805,FBgn0034481,FBgn0013303,FBgn0036926	-|-|-|-|-|-|
GO:0015079	potassium ion transmembrane transporter activity	molecular_function	0.73524	1	1	366	37	10392	FBgn0034246	-|
GO:0030030	cell projection organization	biological_process	0.73527	1	1	366	37	10392	FBgn0029664	-|
GO:0003854	3-beta-hydroxy-delta5-steroid dehydrogenase activity	molecular_function	0.73531	1	1	366	37	10392	FBgn0069973	-|
GO:0016229	steroid dehydrogenase activity	molecular_function	0.73531	1	1	366	37	10392	FBgn0069973	-|
GO:0033764	steroid dehydrogenase activity, acting on the CH-OH group of donors, NAD or NADP as acceptor	molecular_function	0.73531	1	1	366	37	10392	FBgn0069973	-|
GO:0003712	transcription cofactor activity	molecular_function	0.73892	1	5	366	174	10392	FBgn0032184,FBgn0034265,FBgn0036916,FBgn0034503,FBgn0003016	-|-|-|-|-|
GO:0016830	carbon-carbon lyase activity	molecular_function	0.74045	1	2	366	74	10392	FBgn0031957,FBgn0040099	-|-|
GO:0006195	purine nucleotide catabolic process	biological_process	0.74048	1	2	366	74	10392	FBgn0033834,FBgn0034274	-|-|
GO:0072523	purine-containing compound catabolic process	biological_process	0.74048	1	2	366	74	10392	FBgn0034274,FBgn0033834	-|-|
GO:0009653	anatomical structure morphogenesis	biological_process	0.74049	1	2	366	74	10392	FBgn0265576,FBgn0033074	-|-|
GO:0048193	Golgi vesicle transport	biological_process	0.7405	1	2	366	74	10392	FBgn0040099,FBgn0086757	-|-|
GO:0009059	macromolecule biosynthetic process	biological_process	0.74233	1	66	366	1998	10392	FBgn0030616,FBgn0037546,FBgn0000546,FBgn0034265,FBgn0053121,FBgn0011272,FBgn0029531,FBgn0053870,FBgn0021764,Novel000040,FBgn0051703,FBgn0032168,FBgn0003016,FBgn0053868,FBgn0034503,FBgn0030600,FBgn0033855,Novel000042,FBgn0030612,FBgn0031905,FBgn0031196,FBgn0034258,FBgn0034277,FBgn0037539,FBgn0001983,FBgn0029123,FBgn0029657,FBgn0044872,FBgn0052220,FBgn0262519,FBgn0051702,FBgn0032184,Novel000089,FBg…	-|-|-|-|-|-|-|-|-|-|-|-|-|-|-|-|-|-|-|-|-|-|-|-|-|-|-|-|-|-|-|-|-|-|-|-|-|-|-|-|-|-|-|-|-|-|-|-|-|-|-|-|-|-|-|-|-|-|-|-|-|-|-|-|-|-|
GO:0005654	nucleoplasm	cellular_component	0.74254	1	9	366	302	10392	FBgn0034265,FBgn0032184,FBgn0053868,FBgn0014037,FBgn0034503,FBgn0003016,FBgn0053872,FBgn0053869,FBgn0053870	-|-|-|-|-|-|-|-|-|
GO:0044451	nucleoplasm part	cellular_component	0.74254	1	9	366	302	10392	FBgn0034265,FBgn0032184,FBgn0053868,FBgn0014037,FBgn0034503,FBgn0053872,FBgn0003016,FBgn0053869,FBgn0053870	-|-|-|-|-|-|-|-|-|
GO:0000989	transcription factor binding transcription factor activity	molecular_function	0.74344	1	5	366	175	10392	FBgn0036916,FBgn0034265,FBgn0003016,FBgn0034503,FBgn0032184	-|-|-|-|-|
GO:0006913	nucleocytoplasmic transport	biological_process	0.74464	1	1	366	38	10392	FBgn0267727	-|
GO:0051169	nuclear transport	biological_process	0.74464	1	1	366	38	10392	FBgn0267727	-|
GO:0072527	pyrimidine-containing compound metabolic process	biological_process	0.74466	1	1	366	38	10392	FBgn0036915	-|
GO:0006694	steroid biosynthetic process	biological_process	0.74467	1	1	366	38	10392	FBgn0069973	-|
GO:1901575	organic substance catabolic process	biological_process	0.7448	1	12	366	396	10392	FBgn0043456,FBgn0034276,FBgn0025720,FBgn0032956,FBgn0033856,FBgn0031187,FBgn0033834,FBgn0034274,FBgn0030612,FBgn0005655,FBgn0034491,FBgn0027572	-|-|-|-|-|-|-|-|-|-|-|-|
GO:0036094	small molecule binding	molecular_function	0.74596	1	43	366	1327	10392	FBgn0000559,FBgn0039966,FBgn0036931,FBgn0034488,FBgn0001099,FBgn0262866,FBgn0262519,FBgn0028377,FBgn0016701,FBgn0259221,FBgn0037549,FBgn0036497,FBgn0027581,FBgn0261802,FBgn0043456,FBgn0031957,FBgn0266489,FBgn0034246,FBgn0034276,FBgn0002938,FBgn0031955,FBgn0029664,FBgn0014877,FBgn0029123,FBgn0040099,FBgn0034493,FBgn0032167,FBgn0025687,FBgn0003545,FBgn0029006,FBgn0024556,FBgn0033842,FBgn0051755,FBg…	-|-|-|-|-|-|-|-|-|-|-|-|-|-|-|-|-|-|-|-|-|-|-|-|-|-|-|-|-|-|-|-|-|-|-|-|-|-|-|-|-|-|-|
GO:0046915	transition metal ion transmembrane transporter activity	molecular_function	0.7472	1	2	366	75	10392	FBgn0265835,FBgn0039966	-|-|
GO:0007264	small GTPase mediated signal transduction	biological_process	0.74775	1	8	366	272	10392	FBgn0036497,FBgn0264895,FBgn0016701,FBgn0024556,FBgn0037551,FBgn0025836,FBgn0039966,FBgn0031906	-|-|-|-|-|-|-|-|
GO:0035639	purine ribonucleoside triphosphate binding	molecular_function	0.75108	1	35	366	1093	10392	FBgn0040099,FBgn0034493,FBgn0029123,FBgn0032167,FBgn0029664,FBgn0014877,FBgn0031955,FBgn0261802,FBgn0002938,FBgn0266489,FBgn0031957,FBgn0034246,FBgn0037549,FBgn0027581,FBgn0036497,FBgn0028377,FBgn0016701,FBgn0262866,FBgn0262519,FBgn0001099,FBgn0000559,FBgn0036931,FBgn0039966,FBgn0085569,FBgn0028868,FBgn0034274,FBgn0000633,FBgn0037551,FBgn0031906,FBgn0034496,FBgn0051755,FBgn0030612,FBgn0024556,FBg…	-|-|-|-|-|-|-|-|-|-|-|-|-|-|-|-|-|-|-|-|-|-|-|-|-|-|-|-|-|-|-|-|-|-|-|
GO:0007010	cytoskeleton organization	biological_process	0.75189	1	4	366	144	10392	FBgn0052791,FBgn0004228,FBgn0051619,FBgn0031187	-|-|-|-|
GO:0004857	enzyme inhibitor activity	molecular_function	0.752	1	4	366	144	10392	FBgn0261567,FBgn0003448,FBgn0261630,FBgn0034480	-|-|-|-|
GO:0001883	purine nucleoside binding	molecular_function	0.75298	1	35	366	1094	10392	FBgn0034274,FBgn0028868,FBgn0085569,FBgn0034496,FBgn0031906,FBgn0037551,FBgn0000633,FBgn0030612,FBgn0051755,FBgn0003545,FBgn0033842,FBgn0024556,FBgn0032167,FBgn0029123,FBgn0034493,FBgn0040099,FBgn0266489,FBgn0031957,FBgn0034246,FBgn0002938,FBgn0261802,FBgn0031955,FBgn0029664,FBgn0014877,FBgn0016701,FBgn0028377,FBgn0036497,FBgn0027581,FBgn0037549,FBgn0039966,FBgn0036931,FBgn0000559,FBgn0001099,FBg…	-|-|-|-|-|-|-|-|-|-|-|-|-|-|-|-|-|-|-|-|-|-|-|-|-|-|-|-|-|-|-|-|-|-|-|
GO:0032549	ribonucleoside binding	molecular_function	0.75298	1	35	366	1094	10392	FBgn0016701,FBgn0028377,FBgn0036497,FBgn0027581,FBgn0037549,FBgn0039966,FBgn0036931,FBgn0000559,FBgn0001099,FBgn0262866,FBgn0262519,FBgn0032167,FBgn0029123,FBgn0034493,FBgn0040099,FBgn0266489,FBgn0034246,FBgn0031957,FBgn0002938,FBgn0261802,FBgn0031955,FBgn0029664,FBgn0014877,FBgn0030612,FBgn0051755,FBgn0003545,FBgn0033842,FBgn0024556,FBgn0034274,FBgn0028868,FBgn0085569,FBgn0034496,FBgn0031906,FBg…	-|-|-|-|-|-|-|-|-|-|-|-|-|-|-|-|-|-|-|-|-|-|-|-|-|-|-|-|-|-|-|-|-|-|-|
GO:0032550	purine ribonucleoside binding	molecular_function	0.75298	1	35	366	1094	10392	FBgn0032167,FBgn0034493,FBgn0040099,FBgn0029123,FBgn0014877,FBgn0029664,FBgn0031955,FBgn0002938,FBgn0266489,FBgn0031957,FBgn0034246,FBgn0261802,FBgn0027581,FBgn0036497,FBgn0037549,FBgn0016701,FBgn0028377,FBgn0262866,FBgn0262519,FBgn0001099,FBgn0036931,FBgn0039966,FBgn0000559,FBgn0028868,FBgn0085569,FBgn0034274,FBgn0000633,FBgn0037551,FBgn0034496,FBgn0031906,FBgn0030612,FBgn0051755,FBgn0033842,FBg…	-|-|-|-|-|-|-|-|-|-|-|-|-|-|-|-|-|-|-|-|-|-|-|-|-|-|-|-|-|-|-|-|-|-|-|
GO:0016790	thiolester hydrolase activity	molecular_function	0.75368	1	1	366	39	10392	FBgn0031187	-|
GO:0019207	kinase regulator activity	molecular_function	0.75369	1	1	366	39	10392	FBgn0026136	-|
GO:0019887	protein kinase regulator activity	molecular_function	0.75369	1	1	366	39	10392	FBgn0026136	-|
GO:0032555	purine ribonucleotide binding	molecular_function	0.75676	1	35	366	1096	10392	FBgn0033842,FBgn0024556,FBgn0003545,FBgn0030612,FBgn0051755,FBgn0000633,FBgn0037551,FBgn0034496,FBgn0031906,FBgn0028868,FBgn0085569,FBgn0034274,FBgn0262519,FBgn0262866,FBgn0001099,FBgn0036931,FBgn0039966,FBgn0000559,FBgn0027581,FBgn0036497,FBgn0037549,FBgn0016701,FBgn0028377,FBgn0029664,FBgn0014877,FBgn0031955,FBgn0002938,FBgn0266489,FBgn0031957,FBgn0034246,FBgn0261802,FBgn0032167,FBgn0034493,FBg…	-|-|-|-|-|-|-|-|-|-|-|-|-|-|-|-|-|-|-|-|-|-|-|-|-|-|-|-|-|-|-|-|-|-|-|
GO:0065008	regulation of biological quality	biological_process	0.75835	1	8	366	275	10392	FBgn0029662,FBgn0027581,FBgn0036929,FBgn0036932,FBgn0266489,FBgn0001138,FBgn0031959,FBgn0013746	-|-|-|-|-|-|-|-|
GO:0009164	nucleoside catabolic process	biological_process	0.76017	1	2	366	77	10392	FBgn0033834,FBgn0034274	-|-|
GO:0042454	ribonucleoside catabolic process	biological_process	0.76017	1	2	366	77	10392	FBgn0034274,FBgn0033834	-|-|
GO:1901658	glycosyl compound catabolic process	biological_process	0.76017	1	2	366	77	10392	FBgn0033834,FBgn0034274	-|-|
GO:0044454	nuclear chromosome part	cellular_component	0.76224	1	1	366	40	10392	FBgn0005655	-|
GO:0008194	UDP-glycosyltransferase activity	molecular_function	0.76228	1	1	366	40	10392	FBgn0259683	-|
GO:0019013	viral nucleocapsid	cellular_component	0.76229	1	1	366	40	10392	FBgn0265002	-|
GO:0006313	transposition, DNA-mediated	biological_process	0.76239	1	1	366	40	10392	Novel000042	-|
GO:0032196	transposition	biological_process	0.76239	1	1	366	40	10392	Novel000042	-|
GO:0043531	ADP binding	molecular_function	0.7624	1	1	366	40	10392	FBgn0028868	-|
GO:0051258	protein polymerization	biological_process	0.7624	1	1	366	40	10392	FBgn0036929	-|
GO:0016702	oxidoreductase activity, acting on single donors with incorporation of molecular oxygen, incorporation of two atoms of oxygen	molecular_function	0.7624	1	1	366	40	10392	FBgn0005655	-|
GO:0005856	cytoskeleton	cellular_component	0.76255	1	4	366	147	10392	FBgn0002938,FBgn0030614,FBgn0004228,FBgn0264449	-|-|-|-|
GO:0001076	RNA polymerase II transcription factor binding transcription factor activity	molecular_function	0.76607	1	4	366	147	10392	FBgn0032184,FBgn0034265,FBgn0003016,FBgn0034503	-|-|-|-|
GO:0001104	RNA polymerase II transcription cofactor activity	molecular_function	0.76607	1	4	366	147	10392	FBgn0003016,FBgn0034503,FBgn0034265,FBgn0032184	-|-|-|-|
GO:0001882	nucleoside binding	molecular_function	0.76789	1	35	366	1102	10392	FBgn0261802,FBgn0266489,FBgn0034246,FBgn0031957,FBgn0002938,FBgn0031955,FBgn0029664,FBgn0014877,FBgn0029123,FBgn0034493,FBgn0040099,FBgn0032167,FBgn0000559,FBgn0039966,FBgn0036931,FBgn0001099,FBgn0262519,FBgn0262866,FBgn0028377,FBgn0016701,FBgn0037549,FBgn0036497,FBgn0027581,FBgn0031906,FBgn0034496,FBgn0000633,FBgn0037551,FBgn0034274,FBgn0085569,FBgn0028868,FBgn0003545,FBgn0024556,FBgn0033842,FBg…	-|-|-|-|-|-|-|-|-|-|-|-|-|-|-|-|-|-|-|-|-|-|-|-|-|-|-|-|-|-|-|-|-|-|-|
GO:0000278	mitotic cell cycle	biological_process	0.77068	1	1	366	41	10392	FBgn0029667	-|
GO:0044702	single organism reproductive process	biological_process	0.77075	1	1	366	41	10392	FBgn0021764	-|
GO:0015370	solute:sodium symporter activity	molecular_function	0.77079	1	1	366	41	10392	FBgn0029663	-|
GO:0005381	iron ion transmembrane transporter activity	molecular_function	0.77081	1	1	366	41	10392	FBgn0039966	-|
GO:0015093	ferrous iron transmembrane transporter activity	molecular_function	0.77081	1	1	366	41	10392	FBgn0039966	-|
GO:0015684	ferrous iron transport	biological_process	0.77081	1	1	366	41	10392	FBgn0039966	-|
GO:0005198	structural molecule activity	molecular_function	0.77144	1	19	366	621	10392	FBgn0011272,FBgn0032083,FBgn0040099,FBgn0001983,FBgn0029123,FBgn0260964,FBgn0016059,FBgn0030616,FBgn0000546,FBgn0040805,FBgn0053302,FBgn0029535,FBgn0032987,FBgn0030617,FBgn0030608,FBgn0015288,FBgn0034499,FBgn0010411,FBgn0031904	-|-|-|-|-|-|-|-|-|-|-|-|-|-|-|-|-|-|-|
GO:0019438	aromatic compound biosynthetic process	biological_process	0.77218	1	49	366	1519	10392	FBgn0028868,FBgn0029531,FBgn0053869,FBgn0053872,FBgn0022740,FBgn0053870,FBgn0034274,FBgn0000546,FBgn0034265,FBgn0037546,FBgn0053121,FBgn0050109,FBgn0023416,FBgn0036916,FBgn0028387,FBgn0003016,FBgn0030600,FBgn0053868,FBgn0034503,Novel000042,FBgn0033855,FBgn0053871,FBgn0263994,Novel000040,FBgn0021764,FBgn0036915,FBgn0051703,FBgn0001138,FBgn0029657,FBgn0037539,FBgn0052220,FBgn0053156,FBgn0261800,FBg…	-|-|-|-|-|-|-|-|-|-|-|-|-|-|-|-|-|-|-|-|-|-|-|-|-|-|-|-|-|-|-|-|-|-|-|-|-|-|-|-|-|-|-|-|-|-|-|-|-|
GO:0032259	methylation	biological_process	0.7726	1	2	366	79	10392	FBgn0263144,FBgn0037543	-|-|
GO:0044257	cellular protein catabolic process	biological_process	0.7761	1	3	366	115	10392	FBgn0031187,FBgn0025720,FBgn0032956	-|-|-|
GO:0051603	proteolysis involved in cellular protein catabolic process	biological_process	0.7761	1	3	366	115	10392	FBgn0031187,FBgn0025720,FBgn0032956	-|-|-|
GO:0031981	nuclear lumen	cellular_component	0.77671	1	10	366	344	10392	FBgn0053872,FBgn0003016,FBgn0053869,FBgn0053868,FBgn0014037,FBgn0034503,FBgn0005655,FBgn0053870,FBgn0034265,FBgn0032184	-|-|-|-|-|-|-|-|-|-|
GO:0006351	transcription, DNA-dependent	biological_process	0.77767	1	39	366	1226	10392	FBgn0037539,FBgn0029657,FBgn0052220,FBgn0031905,FBgn0031196,FBgn0053873,FBgn0266489,FBgn0014037,FBgn0027581,FBgn0030613,FBgn0000535,FBgn0262519,FBgn0051702,FBgn0032184,FBgn0031904,FBgn0022740,FBgn0053872,FBgn0053869,FBgn0028868,FBgn0029531,FBgn0053870,FBgn0037546,FBgn0034265,FBgn0000546,FBgn0053121,FBgn0003016,FBgn0028387,FBgn0034503,FBgn0030600,FBgn0053868,FBgn0036916,FBgn0033855,FBgn0053871,Nov…	-|-|-|-|-|-|-|-|-|-|-|-|-|-|-|-|-|-|-|-|-|-|-|-|-|-|-|-|-|-|-|-|-|-|-|-|-|-|-|
GO:0005576	extracellular region	cellular_component	0.7779	1	24	366	776	10392	FBgn0031912,Novel000089,FBgn0262363,FBgn0032969,FBgn0021764,FBgn0013746,FBgn0036926,FBgn0050062,FBgn0040294,FBgn0261574,FBgn0036929,FBgn0030613,Novel000234,FBgn0028494,FBgn0040805,FBgn0029664,FBgn0031959,FBgn0031902,FBgn0031903,FBgn0027600,FBgn0004009,FBgn0013303,FBgn0011705,FBgn0052499	-|-|-|-|-|-|-|-|-|-|-|-|-|-|-|-|-|-|-|-|-|-|-|-|
GO:0008289	lipid binding	molecular_function	0.77855	1	2	366	80	10392	FBgn0034265,FBgn0033075	-|-|
GO:0009110	vitamin biosynthetic process	biological_process	0.77887	1	1	366	42	10392	FBgn0036915	-|
GO:0042364	water-soluble vitamin biosynthetic process	biological_process	0.77887	1	1	366	42	10392	FBgn0036915	-|
GO:0006479	protein methylation	biological_process	0.77891	1	1	366	42	10392	FBgn0263144	-|
GO:0008213	protein alkylation	biological_process	0.77891	1	1	366	42	10392	FBgn0263144	-|
GO:0016592	mediator complex	cellular_component	0.77961	1	4	366	150	10392	FBgn0034265,FBgn0034503,FBgn0003016,FBgn0032184	-|-|-|-|
GO:0015629	actin cytoskeleton	cellular_component	0.78093	1	1	366	43	10392	FBgn0002938	-|
GO:0044237	cellular metabolic process	biological_process	0.78108	1	134	366	3992	10392	FBgn0033859,FBgn0031948,FBgn0002524,FBgn0001099,FBgn0025720,FBgn0051702,Novel000089,FBgn0032184,FBgn0025616,FBgn0029657,FBgn0029667,FBgn0031907,FBgn0001983,FBgn0052220,FBgn0036924,FBgn0044872,FBgn0033853,FBgn0034277,FBgn0031196,FBgn0034258,FBgn0031905,FBgn0032981,FBgn0002938,FBgn0029666,FBgn0043456,FBgn0053868,FBgn0034503,FBgn0032168,FBgn0031187,Novel000042,FBgn0025687,FBgn0027572,FBgn0031952,FBg…	-|-|-|-|-|-|-|-|-|-|-|-|-|-|-|-|-|-|-|-|-|-|-|-|-|-|-|-|-|-|-|-|-|-|-|-|-|-|-|-|-|-|-|-|-|-|-|-|-|-|-|-|-|-|-|-|-|-|-|-|-|-|-|-|-|-|-|-|-|-|-|-|-|-|-|-|-|-|-|-|-|-|-|-|-|-|-|-|-|-|-|-|-|-|-|-|-|-|-|-|-|-|-|-|-|-|-|-|-|-|-|-|-|-|-|-|-|-|-|-|-|-|-|-|-|-|-|-
GO:0033036	macromolecule localization	biological_process	0.78134	1	15	366	502	10392	FBgn0036928,FBgn0003475,FBgn0011584,FBgn0030617,FBgn0016976,FBgn0086757,FBgn0031194,FBgn0014877,FBgn0031905,FBgn0021764,FBgn0036920,FBgn0016975,FBgn0001138,FBgn0267727,FBgn0034271	-|-|-|-|-|-|-|-|-|-|-|-|-|-|-|
GO:0016705	oxidoreductase activity, acting on paired donors, with incorporation or reduction of molecular oxygen	molecular_function	0.78171	1	6	366	217	10392	FBgn0034276,FBgn0027529,FBgn0264895,FBgn0030615,FBgn0034246,FBgn0033065	-|-|-|-|-|-|
GO:0032553	ribonucleotide binding	molecular_function	0.78223	1	35	366	1110	10392	FBgn0037549,FBgn0027581,FBgn0036497,FBgn0028377,FBgn0016701,FBgn0262519,FBgn0262866,FBgn0001099,FBgn0000559,FBgn0036931,FBgn0039966,FBgn0034493,FBgn0040099,FBgn0029123,FBgn0032167,FBgn0029664,FBgn0014877,FBgn0031955,FBgn0261802,FBgn0002938,FBgn0034246,FBgn0266489,FBgn0031957,FBgn0051755,FBgn0030612,FBgn0024556,FBgn0033842,FBgn0003545,FBgn0085569,FBgn0028868,FBgn0034274,FBgn0000633,FBgn0037551,FBg…	-|-|-|-|-|-|-|-|-|-|-|-|-|-|-|-|-|-|-|-|-|-|-|-|-|-|-|-|-|-|-|-|-|-|-|
GO:0017076	purine nucleotide binding	molecular_function	0.78398	1	35	366	1111	10392	FBgn0003545,FBgn0033842,FBgn0024556,FBgn0030612,FBgn0051755,FBgn0034496,FBgn0031906,FBgn0000633,FBgn0037551,FBgn0034274,FBgn0028868,FBgn0085569,FBgn0039966,FBgn0036931,FBgn0000559,FBgn0001099,FBgn0262519,FBgn0262866,FBgn0016701,FBgn0028377,FBgn0036497,FBgn0027581,FBgn0037549,FBgn0266489,FBgn0034246,FBgn0031957,FBgn0002938,FBgn0261802,FBgn0031955,FBgn0029664,FBgn0014877,FBgn0032167,FBgn0029123,FBg…	-|-|-|-|-|-|-|-|-|-|-|-|-|-|-|-|-|-|-|-|-|-|-|-|-|-|-|-|-|-|-|-|-|-|-|
GO:0031301	integral to organelle membrane	cellular_component	0.78669	1	1	366	43	10392	FBgn0266429	-|
GO:0010629	negative regulation of gene expression	biological_process	0.78672	1	1	366	43	10392	FBgn0013746	-|
GO:0009166	nucleotide catabolic process	biological_process	0.79013	1	2	366	82	10392	FBgn0034274,FBgn0033834	-|-|
GO:1901292	nucleoside phosphate catabolic process	biological_process	0.79013	1	2	366	82	10392	FBgn0033834,FBgn0034274	-|-|
GO:0009056	catabolic process	biological_process	0.79397	1	14	366	476	10392	FBgn0033834,FBgn0031187,FBgn0034274,FBgn0030612,FBgn0033856,FBgn0027572,FBgn0034491,FBgn0005655,FBgn0034276,FBgn0043456,FBgn0025720,FBgn0031196,FBgn0032956,FBgn0031910	-|-|-|-|-|-|-|-|-|-|-|-|-|-|
GO:0000228	nuclear chromosome	cellular_component	0.79413	1	1	366	44	10392	FBgn0005655	-|
GO:0008083	growth factor activity	molecular_function	0.7942	1	1	366	44	10392	FBgn0034279	-|
GO:0061025	membrane fusion	biological_process	0.7942	1	1	366	44	10392	FBgn0033834	-|
GO:0019953	sexual reproduction	biological_process	0.79423	1	1	366	44	10392	FBgn0021764	-|
GO:0017038	protein import	biological_process	0.79423	1	1	366	44	10392	FBgn0267727	-|
GO:0042025	host cell nucleus	cellular_component	0.79423	1	1	366	44	10392	FBgn0261574	-|
GO:0006721	terpenoid metabolic process	biological_process	0.79427	1	1	366	44	10392	FBgn0034276	-|
GO:0016114	terpenoid biosynthetic process	biological_process	0.79427	1	1	366	44	10392	FBgn0034276	-|
GO:1901564	organonitrogen compound metabolic process	biological_process	0.79528	1	28	366	906	10392	FBgn0043456,Novel000234,FBgn0050109,FBgn0034276,FBgn0029664,FBgn0033065,FBgn0033853,FBgn0027600,FBgn0261800,FBgn0034274,FBgn0036924,FBgn0053156,FBgn0033834,FBgn0005655,FBgn0052499,FBgn0036927,FBgn0028868,FBgn0025687,FBgn0025837,FBgn0036915,FBgn0034489,FBgn0002524,FBgn0031941,FBgn0030612,FBgn0004852,FBgn0028387,FBgn0023416,FBgn0036497	-|-|-|-|-|-|-|-|-|-|-|-|-|-|-|-|-|-|-|-|-|-|-|-|-|-|-|-|
GO:1901361	organic cyclic compound catabolic process	biological_process	0.79537	1	3	366	119	10392	FBgn0033834,FBgn0034274,FBgn0005655	-|-|-|
GO:0008757	S-adenosylmethionine-dependent methyltransferase activity	molecular_function	0.79574	1	2	366	83	10392	FBgn0263144,FBgn0037543	-|-|
GO:0006357	regulation of transcription from RNA polymerase II promoter	biological_process	0.79669	1	4	366	154	10392	FBgn0034265,FBgn0034503,FBgn0003016,FBgn0032184	-|-|-|-|
GO:0005506	iron ion binding	molecular_function	0.7968	1	4	366	154	10392	FBgn0032955,FBgn0033856,FBgn0030615,FBgn0033065	-|-|-|-|
GO:0018130	heterocycle biosynthetic process	biological_process	0.79955	1	49	366	1537	10392	FBgn0033853,FBgn0053873,FBgn0031196,FBgn0031905,FBgn0266489,Novel000234,FBgn0029657,FBgn0037539,FBgn0052220,FBgn0053156,FBgn0261800,FBgn0031941,FBgn0051702,FBgn0262519,FBgn0031904,FBgn0032184,FBgn0030613,FBgn0027581,FBgn0014037,FBgn0004852,FBgn0000535,FBgn0034265,FBgn0000546,FBgn0037546,FBgn0053121,FBgn0050109,FBgn0028868,FBgn0029531,FBgn0053869,FBgn0053872,FBgn0022740,FBgn0053870,FBgn0034274,Nov…	-|-|-|-|-|-|-|-|-|-|-|-|-|-|-|-|-|-|-|-|-|-|-|-|-|-|-|-|-|-|-|-|-|-|-|-|-|-|-|-|-|-|-|-|-|-|-|-|-|
GO:0009893	positive regulation of metabolic process	biological_process	0.80117	1	2	366	84	10392	FBgn0031904,FBgn0031196	-|-|
GO:0031325	positive regulation of cellular metabolic process	biological_process	0.80117	1	2	366	84	10392	FBgn0031904,FBgn0031196	-|-|
GO:0044767	single-organism developmental process	biological_process	0.80118	1	2	366	84	10392	Novel000234,FBgn0033074	-|-|
GO:0015849	organic acid transport	biological_process	0.80151	1	1	366	45	10392	FBgn0036928	-|
GO:0046942	carboxylic acid transport	biological_process	0.80151	1	1	366	45	10392	FBgn0036928	-|
GO:0033647	host intracellular organelle	cellular_component	0.80151	1	1	366	45	10392	FBgn0261574	-|
GO:0033648	host intracellular membrane-bounded organelle	cellular_component	0.80151	1	1	366	45	10392	FBgn0261574	-|
GO:0006766	vitamin metabolic process	biological_process	0.80151	1	1	366	45	10392	FBgn0036915	-|
GO:0006767	water-soluble vitamin metabolic process	biological_process	0.80151	1	1	366	45	10392	FBgn0036915	-|
GO:0005615	extracellular space	cellular_component	0.80154	1	1	366	45	10392	FBgn0036929	-|
GO:0006007	glucose catabolic process	biological_process	0.80155	1	1	366	45	10392	FBgn0043456	-|
GO:0019320	hexose catabolic process	biological_process	0.80155	1	1	366	45	10392	FBgn0043456	-|
GO:0046365	monosaccharide catabolic process	biological_process	0.80155	1	1	366	45	10392	FBgn0043456	-|
GO:0009378	four-way junction helicase activity	molecular_function	0.80155	1	1	366	45	10392	FBgn0028868	-|
GO:0006826	iron ion transport	biological_process	0.80155	1	1	366	45	10392	FBgn0039966	-|
GO:0032774	RNA biosynthetic process	biological_process	0.80387	1	39	366	1242	10392	FBgn0051702,FBgn0262519,FBgn0031904,FBgn0032184,FBgn0030613,FBgn0027581,FBgn0014037,FBgn0000535,FBgn0053873,FBgn0031196,FBgn0031905,FBgn0266489,FBgn0029657,FBgn0037539,FBgn0052220,FBgn0263994,Novel000040,FBgn0021764,FBgn0051703,FBgn0001138,FBgn0036916,FBgn0030600,FBgn0034503,FBgn0053868,FBgn0028387,FBgn0003016,Novel000042,FBgn0053871,FBgn0033855,FBgn0034265,FBgn0000546,FBgn0037546,FBgn0053121,FBg…	-|-|-|-|-|-|-|-|-|-|-|-|-|-|-|-|-|-|-|-|-|-|-|-|-|-|-|-|-|-|-|-|-|-|-|-|-|-|-|
GO:0006778	porphyrin-containing compound metabolic process	biological_process	0.80465	1	3	366	121	10392	FBgn0028868,FBgn0034489,FBgn0033065	-|-|-|
GO:0016482	cytoplasmic transport	biological_process	0.80469	1	3	366	121	10392	FBgn0086757,FBgn0267727,FBgn0036920	-|-|-|
GO:0022804	active transmembrane transporter activity	molecular_function	0.80485	1	4	366	156	10392	FBgn0010812,FBgn0039946,FBgn0050109,FBgn0029663	-|-|-|-|
GO:0044430	cytoskeletal part	cellular_component	0.80571	1	3	366	122	10392	FBgn0004228,FBgn0030614,FBgn0002938	-|-|-|
GO:0016903	oxidoreductase activity, acting on the aldehyde or oxo group of donors	molecular_function	0.80857	1	1	366	46	10392	FBgn0025687	-|
GO:0030163	protein catabolic process	biological_process	0.80915	1	3	366	122	10392	FBgn0032956,FBgn0025720,FBgn0031187	-|-|-|
GO:0016070	RNA metabolic process	biological_process	0.80954	1	52	366	1633	10392	FBgn0263994,Novel000040,FBgn0021764,FBgn0051703,FBgn0001138,FBgn0036916,FBgn0003016,FBgn0028387,FBgn0034503,FBgn0053868,FBgn0030600,Novel000042,FBgn0033855,FBgn0053871,FBgn0034265,FBgn0000546,FBgn0034249,FBgn0037546,FBgn0053121,FBgn0029531,FBgn0028868,FBgn0053872,FBgn0053869,FBgn0037543,FBgn0022740,FBgn0053870,FBgn0003559,FBgn0262519,FBgn0051702,FBgn0263774,FBgn0033072,FBgn0031904,FBgn0032184,FBg…	-|-|-|-|-|-|-|-|-|-|-|-|-|-|-|-|-|-|-|-|-|-|-|-|-|-|-|-|-|-|-|-|-|-|-|-|-|-|-|-|-|-|-|-|-|-|-|-|-|-|-|-|
GO:1901362	organic cyclic compound biosynthetic process	biological_process	0.8128	1	50	366	1576	10392	FBgn0031941,FBgn0051702,FBgn0262519,FBgn0031904,FBgn0032184,FBgn0030613,FBgn0027581,FBgn0014037,FBgn0004852,FBgn0069973,FBgn0000535,FBgn0053873,FBgn0033853,FBgn0031196,FBgn0031905,FBgn0266489,Novel000234,FBgn0029657,FBgn0037539,FBgn0052220,FBgn0053156,FBgn0261800,Novel000040,FBgn0263994,FBgn0036915,FBgn0021764,FBgn0051703,FBgn0001138,FBgn0036916,FBgn0023416,FBgn0030600,FBgn0053868,FBgn0034503,FBg…	-|-|-|-|-|-|-|-|-|-|-|-|-|-|-|-|-|-|-|-|-|-|-|-|-|-|-|-|-|-|-|-|-|-|-|-|-|-|-|-|-|-|-|-|-|-|-|-|-|-|
GO:0006338	chromatin remodeling	biological_process	0.81527	1	1	366	47	10392	FBgn0030613	-|
GO:0031300	intrinsic to organelle membrane	cellular_component	0.81531	1	1	366	47	10392	FBgn0266429	-|
GO:0004129	cytochrome-c oxidase activity	molecular_function	0.81534	1	1	366	47	10392	FBgn0031194	-|
GO:0016675	oxidoreductase activity, acting on a heme group of donors	molecular_function	0.81534	1	1	366	47	10392	FBgn0031194	-|
GO:0016676	oxidoreductase activity, acting on a heme group of donors, oxygen as acceptor	molecular_function	0.81534	1	1	366	47	10392	FBgn0031194	-|
GO:0060255	regulation of macromolecule metabolic process	biological_process	0.81596	1	32	366	1039	10392	FBgn0034265,FBgn0000546,FBgn0037546,FBgn0029531,FBgn0028868,FBgn0022740,FBgn0037543,FBgn0005655,Novel000040,FBgn0263994,FBgn0021764,FBgn0013746,FBgn0001138,FBgn0036916,FBgn0028387,FBgn0003016,FBgn0034503,FBgn0030600,Novel000042,FBgn0033855,FBgn0031905,FBgn0031196,FBgn0266489,FBgn0029657,FBgn0037539,FBgn0262519,FBgn0036932,FBgn0031904,FBgn0032184,FBgn0027581,FBgn0030613,FBgn0000535	-|-|-|-|-|-|-|-|-|-|-|-|-|-|-|-|-|-|-|-|-|-|-|-|-|-|-|-|-|-|-|-|
GO:0033643	host cell part	cellular_component	0.81674	1	2	366	87	10392	FBgn0013746,FBgn0261574	-|-|
GO:0019439	aromatic compound catabolic process	biological_process	0.81767	1	3	366	124	10392	FBgn0005655,FBgn0034274,FBgn0033834	-|-|-|
GO:0044271	cellular nitrogen compound biosynthetic process	biological_process	0.81793	1	49	366	1550	10392	FBgn0266489,Novel000234,FBgn0033853,FBgn0053873,FBgn0031905,FBgn0031196,FBgn0053156,FBgn0052220,FBgn0261800,FBgn0029657,FBgn0037539,FBgn0031904,FBgn0032184,FBgn0031941,FBgn0051702,FBgn0262519,FBgn0004852,FBgn0000535,FBgn0027581,FBgn0030613,FBgn0014037,FBgn0053121,FBgn0050109,FBgn0000546,FBgn0034265,FBgn0037546,FBgn0053870,FBgn0034274,FBgn0029531,FBgn0028868,FBgn0053869,FBgn0053872,FBgn0022740,FBg…	-|-|-|-|-|-|-|-|-|-|-|-|-|-|-|-|-|-|-|-|-|-|-|-|-|-|-|-|-|-|-|-|-|-|-|-|-|-|-|-|-|-|-|-|-|-|-|-|-|
GO:0044421	extracellular region part	cellular_component	0.81948	1	6	366	228	10392	FBgn0013303,FBgn0040805,FBgn0261574,FBgn0036929,FBgn0036926,FBgn0013746	-|-|-|-|-|-|
GO:0006955	immune response	biological_process	0.82179	1	1	366	48	10392	FBgn0031959	-|
GO:0005085	guanyl-nucleotide exchange factor activity	molecular_function	0.82181	1	1	366	48	10392	FBgn0025836	-|
GO:0015002	heme-copper terminal oxidase activity	molecular_function	0.82187	1	1	366	48	10392	FBgn0031194	-|
GO:1901363	heterocyclic compound binding	molecular_function	0.82292	1	98	366	2993	10392	FBgn0028868,FBgn0053872,FBgn0053869,FBgn0037543,FBgn0005655,FBgn0034274,FBgn0036496,FBgn0034249,FBgn0037551,FBgn0000633,FBgn0034496,FBgn0053861,FBgn0036918,FBgn0032169,Novel000211,FBgn0053871,FBgn0024556,FBgn0029006,FBgn0001138,FBgn0032167,FBgn0034493,FBgn0053873,FBgn0014877,FBgn0029664,FBgn0266489,FBgn0027581,FBgn0036497,FBgn0031909,FBgn0030613,FBgn0053858,FBgn0028377,FBgn0262866,FBgn0263774,FBg…	-|-|-|-|-|-|-|-|-|-|-|-|-|-|-|-|-|-|-|-|-|-|-|-|-|-|-|-|-|-|-|-|-|-|-|-|-|-|-|-|-|-|-|-|-|-|-|-|-|-|-|-|-|-|-|-|-|-|-|-|-|-|-|-|-|-|-|-|-|-|-|-|-|-|-|-|-|-|-|-|-|-|-|-|-|-|-|-|-|-|-|-|-|-|-|-|-|-|
GO:0009890	negative regulation of biosynthetic process	biological_process	0.82814	1	1	366	49	10392	FBgn0031906	-|
GO:0017016	Ras GTPase binding	molecular_function	0.82816	1	1	366	49	10392	FBgn0003475	-|
GO:0031267	small GTPase binding	molecular_function	0.82816	1	1	366	49	10392	FBgn0003475	-|
GO:0051020	GTPase binding	molecular_function	0.82816	1	1	366	49	10392	FBgn0003475	-|
GO:0016706	oxidoreductase activity, acting on paired donors, with incorporation or reduction of molecular oxygen, 2-oxoglutarate as one donor, and incorporation of one atom each of oxygen into both donors	molecular_function	0.82818	1	1	366	49	10392	FBgn0034246	-|
GO:0097159	organic cyclic compound binding	molecular_function	0.8282	1	98	366	2998	10392	FBgn0053872,FBgn0037543,FBgn0053869,FBgn0005655,FBgn0028868,FBgn0036496,FBgn0034274,FBgn0034249,FBgn0037551,FBgn0000633,FBgn0053861,FBgn0034496,FBgn0036918,Novel000211,FBgn0032169,FBgn0053871,FBgn0024556,FBgn0001138,FBgn0029006,FBgn0034493,FBgn0032167,FBgn0014877,FBgn0029664,FBgn0053873,FBgn0266489,FBgn0053858,FBgn0027581,FBgn0031909,FBgn0036497,FBgn0030613,FBgn0028377,FBgn0262866,FBgn0263774,FBg…	-|-|-|-|-|-|-|-|-|-|-|-|-|-|-|-|-|-|-|-|-|-|-|-|-|-|-|-|-|-|-|-|-|-|-|-|-|-|-|-|-|-|-|-|-|-|-|-|-|-|-|-|-|-|-|-|-|-|-|-|-|-|-|-|-|-|-|-|-|-|-|-|-|-|-|-|-|-|-|-|-|-|-|-|-|-|-|-|-|-|-|-|-|-|-|-|-|-|
GO:0007049	cell cycle	biological_process	0.82881	1	6	366	231	10392	FBgn0015799,FBgn0029667,FBgn0030600,FBgn0005655,FBgn0016701,FBgn0031906	-|-|-|-|-|-|
GO:0033692	cellular polysaccharide biosynthetic process	biological_process	0.83011	1	3	366	127	10392	FBgn0262866,FBgn0052220,FBgn0069973	-|-|-|
GO:0008047	enzyme activator activity	molecular_function	0.83121	1	2	366	90	10392	FBgn0264895,FBgn0031188	-|-|
GO:0051301	cell division	biological_process	0.83124	1	2	366	90	10392	FBgn0016701,FBgn0030600	-|-|
GO:0000271	polysaccharide biosynthetic process	biological_process	0.83407	1	3	366	128	10392	FBgn0262866,FBgn0052220,FBgn0069973	-|-|-|
GO:0004527	exonuclease activity	molecular_function	0.83409	1	1	366	50	10392	FBgn0029123	-|
GO:0030154	cell differentiation	biological_process	0.83423	1	1	366	50	10392	FBgn0033074	-|
GO:0000287	magnesium ion binding	molecular_function	0.83425	1	1	366	50	10392	FBgn0034488	-|
GO:0006576	cellular biogenic amine metabolic process	biological_process	0.83426	1	1	366	50	10392	FBgn0036497	-|
GO:0002376	immune system process	biological_process	0.84005	1	1	366	51	10392	FBgn0031959	-|
GO:0010628	positive regulation of gene expression	biological_process	0.8401	1	1	366	51	10392	FBgn0031904	-|
GO:0045893	positive regulation of transcription, DNA-dependent	biological_process	0.8401	1	1	366	51	10392	FBgn0031904	-|
GO:0045935	positive regulation of nucleobase-containing compound metabolic process	biological_process	0.8401	1	1	366	51	10392	FBgn0031904	-|
GO:0051173	positive regulation of nitrogen compound metabolic process	biological_process	0.8401	1	1	366	51	10392	FBgn0031904	-|
GO:0051254	positive regulation of RNA metabolic process	biological_process	0.8401	1	1	366	51	10392	FBgn0031904	-|
GO:0008653	lipopolysaccharide metabolic process	biological_process	0.84027	1	2	366	92	10392	FBgn0262866,FBgn0052220	-|-|
GO:0009103	lipopolysaccharide biosynthetic process	biological_process	0.84027	1	2	366	92	10392	FBgn0262866,FBgn0052220	-|-|
GO:0030258	lipid modification	biological_process	0.84579	1	1	366	52	10392	FBgn0027572	-|
GO:0010605	negative regulation of macromolecule metabolic process	biological_process	0.85121	1	1	366	53	10392	FBgn0013746	-|
GO:0070838	divalent metal ion transport	biological_process	0.85124	1	1	366	53	10392	FBgn0039966	-|
GO:0044106	cellular amine metabolic process	biological_process	0.85125	1	1	366	53	10392	FBgn0036497	-|
GO:0044724	single-organism carbohydrate catabolic process	biological_process	0.85125	1	1	366	53	10392	FBgn0043456	-|
GO:0004518	nuclease activity	molecular_function	0.85142	1	4	366	169	10392	FBgn0034246,FBgn0004638,FBgn0034249,FBgn0029123	-|-|-|-|
GO:0018995	host	cellular_component	0.85308	1	2	366	95	10392	FBgn0013746,FBgn0261574	-|-|
GO:0043245	extraorganismal space	cellular_component	0.85308	1	2	366	95	10392	FBgn0261574,FBgn0013746	-|-|
GO:0043657	host cell	cellular_component	0.85308	1	2	366	95	10392	FBgn0261574,FBgn0013746	-|-|
GO:0044215	other organism	cellular_component	0.85308	1	2	366	95	10392	FBgn0013746,FBgn0261574	-|-|
GO:0044216	other organism cell	cellular_component	0.85308	1	2	366	95	10392	FBgn0013746,FBgn0261574	-|-|
GO:0044217	other organism part	cellular_component	0.85308	1	2	366	95	10392	FBgn0261574,FBgn0013746	-|-|
GO:0009889	regulation of biosynthetic process	biological_process	0.8553	1	30	366	1004	10392	FBgn0005655,FBgn0037539,FBgn0022740,FBgn0029657,FBgn0028868,FBgn0029531,FBgn0031196,FBgn0037546,FBgn0031905,FBgn0000546,FBgn0034265,FBgn0031906,FBgn0266489,FBgn0034503,FBgn0030600,FBgn0003016,FBgn0028387,FBgn0030613,FBgn0036916,FBgn0027581,FBgn0033855,FBgn0000535,Novel000042,FBgn0021764,FBgn0262519,Novel000040,FBgn0263994,FBgn0001138,FBgn0032184,FBgn0031904	-|-|-|-|-|-|-|-|-|-|-|-|-|-|-|-|-|-|-|-|-|-|-|-|-|-|-|-|-|-|
GO:0015293	symporter activity	molecular_function	0.85651	1	1	366	54	10392	FBgn0029663	-|
GO:0015294	solute:cation symporter activity	molecular_function	0.85651	1	1	366	54	10392	FBgn0029663	-|
GO:0044265	cellular macromolecule catabolic process	biological_process	0.85957	1	3	366	135	10392	FBgn0025720,FBgn0032956,FBgn0031187	-|-|-|
GO:0008238	exopeptidase activity	molecular_function	0.86093	1	2	366	97	10392	FBgn0033860,FBgn0032969	-|-|
GO:0009891	positive regulation of biosynthetic process	biological_process	0.86157	1	1	366	55	10392	FBgn0031904	-|
GO:0010557	positive regulation of macromolecule biosynthetic process	biological_process	0.86157	1	1	366	55	10392	FBgn0031904	-|
GO:0031328	positive regulation of cellular biosynthetic process	biological_process	0.86157	1	1	366	55	10392	FBgn0031904	-|
GO:0051056	regulation of small GTPase mediated signal transduction	biological_process	0.86489	1	2	366	98	10392	FBgn0264895,FBgn0025836	-|-|
GO:0040011	locomotion	biological_process	0.86493	1	2	366	98	10392	FBgn0029667,FBgn0036498	-|-|
GO:0044264	cellular polysaccharide metabolic process	biological_process	0.86625	1	3	366	137	10392	FBgn0262866,FBgn0052220,FBgn0069973	-|-|-|
GO:0019048	modulation by virus of host morphology or physiology	biological_process	0.86642	1	1	366	56	10392	FBgn0013746	-|
GO:0061024	membrane organization	biological_process	0.86645	1	1	366	56	10392	FBgn0033834	-|
GO:0010604	positive regulation of macromolecule metabolic process	biological_process	0.86647	1	1	366	56	10392	FBgn0031904	-|
GO:0016052	carbohydrate catabolic process	biological_process	0.8665	1	1	366	56	10392	FBgn0043456	-|
GO:0019028	viral capsid	cellular_component	0.86725	1	6	366	245	10392	FBgn0031950,FBgn0032167,FBgn0029535,FBgn0265002,FBgn0031910,FBgn0040099	-|-|-|-|-|-|
GO:0008652	cellular amino acid biosynthetic process	biological_process	0.87232	1	2	366	100	10392	FBgn0261800,FBgn0025687	-|-|
GO:0010468	regulation of gene expression	biological_process	0.87529	1	30	366	1019	10392	FBgn0263994,Novel000040,FBgn0262519,FBgn0021764,FBgn0013746,FBgn0031904,FBgn0032184,FBgn0001138,FBgn0036916,FBgn0027581,FBgn0030613,FBgn0028387,FBgn0003016,FBgn0034503,FBgn0030600,Novel000042,FBgn0000535,FBgn0033855,FBgn0000546,FBgn0034265,FBgn0031905,FBgn0031196,FBgn0037546,FBgn0266489,FBgn0029531,FBgn0028868,FBgn0029657,FBgn0022740,FBgn0037543,FBgn0037539	-|-|-|-|-|-|-|-|-|-|-|-|-|-|-|-|-|-|-|-|-|-|-|-|-|-|-|-|-|-|
GO:0005488	binding	molecular_function	0.8757	1	205	366	6110	10392	FBgn0085450,FBgn0010812,FBgn0001138,FBgn0040502,FBgn0024556,FBgn0030617,FBgn0030603,FBgn0032169,FBgn0053861,FBgn0021847,FBgn0000633,FBgn0027600,FBgn0016059,FBgn0034274,FBgn0036496,FBgn0053872,FBgn0022740,FBgn0005655,FBgn0033067,FBgn0031947,FBgn0010411,FBgn0046697,FBgn0040477,FBgn0039966,FBgn0262866,FBgn0263774,FBgn0034489,FBgn0028377,FBgn0069973,FBgn0016976,FBgn0030610,FBgn0032171,FBgn0031909,FBg…	-|-|-|-|-|-|-|-|-|-|-|-|-|-|-|-|-|-|-|-|-|-|-|-|-|-|-|-|-|-|-|-|-|-|-|-|-|-|-|-|-|-|-|-|-|-|-|-|-|-|-|-|-|-|-|-|-|-|-|-|-|-|-|-|-|-|-|-|-|-|-|-|-|-|-|-|-|-|-|-|-|-|-|-|-|-|-|-|-|-|-|-|-|-|-|-|-|-|-|-|-|-|-|-|-|-|-|-|-|-|-|-|-|-|-|-|-|-|-|-|-|-|-|-|-|-|-|-
GO:0007017	microtubule-based process	biological_process	0.87586	1	2	366	101	10392	FBgn0003545,FBgn0031955	-|-|
GO:0009966	regulation of signal transduction	biological_process	0.87867	1	3	366	141	10392	FBgn0036932,FBgn0025836,FBgn0264895	-|-|-|
GO:0010646	regulation of cell communication	biological_process	0.87867	1	3	366	141	10392	FBgn0025836,FBgn0036932,FBgn0264895	-|-|-|
GO:0003674	molecular_function	molecular_function	0.87893	1	318	366	9214	10392	FBgn0085450,FBgn0030603,FBgn0000633,FBgn0259683,FBgn0034245,FBgn0036496,FBgn0033067,FBgn0005655,FBgn0010411,FBgn0052792,FBgn0262363,FBgn0263774,FBgn0261567,FBgn0034489,FBgn0028377,FBgn0016976,FBgn0025835,FBgn0083968,FBgn0032171,FBgn0050106,FBgn0031909,Novel000234,FBgn0036500,FBgn0266489,FBgn0034484,FBgn0013303,FBgn0004009,FBgn0034493,FBgn0031918,FBgn0034507,FBgn0030615,FBgn0021764,FBgn0033855,FBg…	-|-|-|-|-|-|-|-|-|-|-|-|-|-|-|-|-|-|-|-|-|-|-|-|-|-|-|-|-|-|-|-|-|-|-|-|-|-|-|-|-|-|-|-|-|-|-|-|-|-|-|-|-|-|-|-|-|-|-|-|-|-|-|-|-|-|-|-|-|-|-|-|-|-|-|-|-|-|-|-|-|-|-|-|-|-|-|-|-|-|-|-|-|-|-|-|-|-|-|-|-|-|-|-|-|-|-|-|-|-|-|-|-|-|-|-|-|-|-|-|-|-|-|-|-|-|-|-
GO:0005976	polysaccharide metabolic process	biological_process	0.88165	1	3	366	142	10392	FBgn0262866,FBgn0069973,FBgn0052220	-|-|-|
GO:0023051	regulation of signaling	biological_process	0.88733	1	3	366	144	10392	FBgn0025836,FBgn0036932,FBgn0264895	-|-|-|
GO:2000112	regulation of cellular macromolecule biosynthetic process	biological_process	0.88744	1	29	366	998	10392	FBgn0030613,FBgn0036916,FBgn0027581,FBgn0030600,FBgn0034503,FBgn0028387,FBgn0003016,Novel000042,FBgn0033855,FBgn0000535,Novel000040,FBgn0263994,FBgn0262519,FBgn0021764,FBgn0031904,FBgn0001138,FBgn0032184,FBgn0029657,FBgn0029531,FBgn0028868,FBgn0005655,FBgn0022740,FBgn0037539,FBgn0000546,FBgn0034265,FBgn0031196,FBgn0037546,FBgn0031905,FBgn0266489	-|-|-|-|-|-|-|-|-|-|-|-|-|-|-|-|-|-|-|-|-|-|-|-|-|-|-|-|-|
GO:0009308	amine metabolic process	biological_process	0.88852	1	1	366	61	10392	FBgn0036497	-|
GO:0004867	serine-type endopeptidase inhibitor activity	molecular_function	0.88853	1	1	366	61	10392	FBgn0261630	-|
GO:0034655	nucleobase-containing compound catabolic process	biological_process	0.88918	1	2	366	105	10392	FBgn0034274,FBgn0033834	-|-|
GO:0010556	regulation of macromolecule biosynthetic process	biological_process	0.88978	1	29	366	1000	10392	FBgn0031904,FBgn0001138,FBgn0032184,FBgn0263994,Novel000040,FBgn0021764,FBgn0262519,Novel000042,FBgn0033855,FBgn0000535,FBgn0030613,FBgn0027581,FBgn0036916,FBgn0030600,FBgn0034503,FBgn0028387,FBgn0003016,FBgn0266489,FBgn0000546,FBgn0034265,FBgn0037546,FBgn0031196,FBgn0031905,FBgn0029657,FBgn0028868,FBgn0029531,FBgn0005655,FBgn0037539,FBgn0022740	-|-|-|-|-|-|-|-|-|-|-|-|-|-|-|-|-|-|-|-|-|-|-|-|-|-|-|-|-|
GO:0031326	regulation of cellular biosynthetic process	biological_process	0.88978	1	29	366	1000	10392	FBgn0266489,FBgn0031905,FBgn0031196,FBgn0037546,FBgn0034265,FBgn0000546,FBgn0037539,FBgn0022740,FBgn0005655,FBgn0029531,FBgn0028868,FBgn0029657,FBgn0032184,FBgn0001138,FBgn0031904,FBgn0021764,FBgn0262519,FBgn0263994,Novel000040,FBgn0000535,FBgn0033855,Novel000042,FBgn0028387,FBgn0003016,FBgn0030600,FBgn0034503,FBgn0027581,FBgn0036916,FBgn0030613	-|-|-|-|-|-|-|-|-|-|-|-|-|-|-|-|-|-|-|-|-|-|-|-|-|-|-|-|-|
GO:0048583	regulation of response to stimulus	biological_process	0.89009	1	3	366	145	10392	FBgn0025836,FBgn0036932,FBgn0264895	-|-|-|
GO:0003899	DNA-directed RNA polymerase activity	molecular_function	0.89237	1	2	366	106	10392	FBgn0053121,FBgn0001138	-|-|
GO:0044003	modification by symbiont of host morphology or physiology	biological_process	0.89241	1	1	366	62	10392	FBgn0013746	-|
GO:0051817	modification of morphology or physiology of other organism involved in symbiotic interaction	biological_process	0.89241	1	1	366	62	10392	FBgn0013746	-|
GO:0006355	regulation of transcription, DNA-dependent	biological_process	0.89454	1	28	366	973	10392	FBgn0028868,FBgn0029531,FBgn0029657,FBgn0037539,FBgn0022740,FBgn0000546,FBgn0034265,FBgn0031905,FBgn0031196,FBgn0037546,FBgn0266489,FBgn0036916,FBgn0027581,FBgn0030613,FBgn0028387,FBgn0003016,FBgn0034503,FBgn0030600,Novel000042,FBgn0000535,FBgn0033855,FBgn0263994,Novel000040,FBgn0262519,FBgn0021764,FBgn0031904,FBgn0032184,FBgn0001138	-|-|-|-|-|-|-|-|-|-|-|-|-|-|-|-|-|-|-|-|-|-|-|-|-|-|-|-|
GO:0016851	magnesium chelatase activity	molecular_function	0.89625	1	1	366	63	10392	FBgn0028868	-|
GO:0051002	ligase activity, forming nitrogen-metal bonds	molecular_function	0.89625	1	1	366	63	10392	FBgn0028868	-|
GO:0051003	ligase activity, forming nitrogen-metal bonds, forming coordination complexes	molecular_function	0.89625	1	1	366	63	10392	FBgn0028868	-|
GO:0019222	regulation of metabolic process	biological_process	0.89638	1	33	366	1130	10392	FBgn0266489,FBgn0031196,FBgn0031905,FBgn0037539,FBgn0029657,FBgn0032184,FBgn0031904,FBgn0036932,FBgn0262519,FBgn0000535,FBgn0030613,FBgn0027581,FBgn0031906,FBgn0037546,FBgn0034265,FBgn0000546,FBgn0005655,FBgn0022740,FBgn0037543,FBgn0029531,FBgn0028868,FBgn0001138,FBgn0013746,FBgn0021764,Novel000040,FBgn0263994,FBgn0033855,Novel000042,FBgn0030600,FBgn0034503,FBgn0003016,FBgn0028387,FBgn0036916	-|-|-|-|-|-|-|-|-|-|-|-|-|-|-|-|-|-|-|-|-|-|-|-|-|-|-|-|-|-|-|-|-|
GO:0051252	regulation of RNA metabolic process	biological_process	0.8968	1	28	366	975	10392	FBgn0266489,FBgn0034265,FBgn0000546,FBgn0037546,FBgn0031196,FBgn0031905,FBgn0029657,FBgn0029531,FBgn0028868,FBgn0037539,FBgn0022740,FBgn0031904,FBgn0001138,FBgn0032184,Novel000040,FBgn0263994,FBgn0262519,FBgn0021764,Novel000042,FBgn0000535,FBgn0033855,FBgn0030613,FBgn0036916,FBgn0027581,FBgn0034503,FBgn0030600,FBgn0003016,FBgn0028387	-|-|-|-|-|-|-|-|-|-|-|-|-|-|-|-|-|-|-|-|-|-|-|-|-|-|-|-|
GO:2001141	regulation of RNA biosynthetic process	biological_process	0.8968	1	28	366	975	10392	FBgn0037539,FBgn0022740,FBgn0028868,FBgn0029531,FBgn0029657,FBgn0266489,FBgn0031905,FBgn0037546,FBgn0031196,FBgn0000546,FBgn0034265,FBgn0033855,FBgn0000535,Novel000042,FBgn0028387,FBgn0003016,FBgn0030600,FBgn0034503,FBgn0027581,FBgn0036916,FBgn0030613,FBgn0032184,FBgn0001138,FBgn0031904,FBgn0021764,FBgn0262519,Novel000040,FBgn0263994	-|-|-|-|-|-|-|-|-|-|-|-|-|-|-|-|-|-|-|-|-|-|-|-|-|-|-|-|
GO:0048523	negative regulation of cellular process	biological_process	0.89836	1	2	366	108	10392	FBgn0005655,FBgn0013746	-|-|
GO:0035821	modification of morphology or physiology of other organism	biological_process	0.8999	1	1	366	64	10392	FBgn0013746	-|
GO:0006414	translational elongation	biological_process	0.8999	1	1	366	64	10392	FBgn0029123	-|
GO:0044428	nuclear part	cellular_component	0.90137	1	13	366	499	10392	FBgn0036494,Novel000089,FBgn0032184,FBgn0034265,FBgn0053870,FBgn0259148,FBgn0053868,FBgn0005655,FBgn0034503,FBgn0014037,FBgn0053872,FBgn0053869,FBgn0003016	-|-|-|-|-|-|-|-|-|-|-|-|-|
GO:0033013	tetrapyrrole metabolic process	biological_process	0.90303	1	3	366	150	10392	FBgn0034489,FBgn0028868,FBgn0033065	-|-|-|
GO:0015630	microtubule cytoskeleton	cellular_component	0.90339	1	1	366	65	10392	FBgn0030614	-|
GO:0045454	cell redox homeostasis	biological_process	0.90345	1	1	366	65	10392	FBgn0029662	-|
GO:0022402	cell cycle process	biological_process	0.90678	1	2	366	111	10392	FBgn0005655,FBgn0029667	-|-|
GO:0006184	GTP catabolic process	biological_process	0.90691	1	1	366	66	10392	FBgn0033834	-|
GO:1901069	guanosine-containing compound catabolic process	biological_process	0.90691	1	1	366	66	10392	FBgn0033834	-|
GO:0004970	ionotropic glutamate receptor activity	molecular_function	0.91021	1	1	366	67	10392	FBgn0259683	-|
GO:0005231	excitatory extracellular ligand-gated ion channel activity	molecular_function	0.91021	1	1	366	67	10392	FBgn0259683	-|
GO:0005234	extracellular-glutamate-gated ion channel activity	molecular_function	0.91021	1	1	366	67	10392	FBgn0259683	-|
GO:0008066	glutamate receptor activity	molecular_function	0.91021	1	1	366	67	10392	FBgn0259683	-|
GO:0007059	chromosome segregation	biological_process	0.91021	1	1	366	67	10392	FBgn0016701	-|
GO:0043167	ion binding	molecular_function	0.91291	1	88	366	2805	10392	FBgn0031955,FBgn0033065,FBgn0039941,FBgn0262360,FBgn0032956,FBgn0031957,FBgn0034246,FBgn0034276,FBgn0002938,FBgn0261802,FBgn0029657,FBgn0052984,FBgn0029123,FBgn0040099,FBgn0001983,FBgn0265576,FBgn0036926,FBgn0002524,FBgn0001099,FBgn0033828,FBgn0034488,FBgn0262519,FBgn0032979,FBgn0036923,Novel000089,FBgn0003475,FBgn0037549,FBgn0016701,FBgn0259221,FBgn0004228,FBgn0028979,FBgn0000546,FBgn0034265,FBg…	-|-|-|-|-|-|-|-|-|-|-|-|-|-|-|-|-|-|-|-|-|-|-|-|-|-|-|-|-|-|-|-|-|-|-|-|-|-|-|-|-|-|-|-|-|-|-|-|-|-|-|-|-|-|-|-|-|-|-|-|-|-|-|-|-|-|-|-|-|-|-|-|-|-|-|-|-|-|-|-|-|-|-|-|-|-|-|-|
GO:0006366	transcription from RNA polymerase II promoter	biological_process	0.91421	1	5	366	231	10392	FBgn0032184,FBgn0034265,FBgn0003016,FBgn0014037,FBgn0034503	-|-|-|-|-|
GO:0044270	cellular nitrogen compound catabolic process	biological_process	0.91451	1	2	366	114	10392	FBgn0033834,FBgn0034274	-|-|
GO:0046700	heterocycle catabolic process	biological_process	0.91697	1	2	366	115	10392	FBgn0034274,FBgn0033834	-|-|
GO:0042302	structural constituent of cuticle	molecular_function	0.91706	1	2	366	115	10392	FBgn0034499,FBgn0053302	-|-|
GO:0016758	transferase activity, transferring hexosyl groups	molecular_function	0.91881	1	3	366	157	10392	FBgn0259683,FBgn0086368,FBgn0044872	-|-|-|
GO:0008061	chitin binding	molecular_function	0.91942	1	2	366	116	10392	FBgn0027600,FBgn0052499	-|-|
GO:0046039	GTP metabolic process	biological_process	0.91943	1	1	366	70	10392	FBgn0033834	-|
GO:0016757	transferase activity, transferring glycosyl groups	molecular_function	0.9207	1	4	366	197	10392	FBgn0086368,FBgn0032078,FBgn0044872,FBgn0259683	-|-|-|-|
GO:0019219	regulation of nucleobase-containing compound metabolic process	biological_process	0.9223	1	29	366	1032	10392	FBgn0005655,FBgn0022740,FBgn0037539,FBgn0029657,FBgn0029531,FBgn0028868,FBgn0031196,FBgn0037546,FBgn0031905,FBgn0034265,FBgn0000546,FBgn0266489,FBgn0030600,FBgn0034503,FBgn0028387,FBgn0003016,FBgn0030613,FBgn0036916,FBgn0027581,FBgn0033855,FBgn0000535,Novel000042,FBgn0262519,FBgn0021764,FBgn0263994,Novel000040,FBgn0001138,FBgn0032184,FBgn0031904	-|-|-|-|-|-|-|-|-|-|-|-|-|-|-|-|-|-|-|-|-|-|-|-|-|-|-|-|-|
GO:0051171	regulation of nitrogen compound metabolic process	biological_process	0.9223	1	29	366	1032	10392	FBgn0031904,FBgn0032184,FBgn0001138,Novel000040,FBgn0263994,FBgn0262519,FBgn0021764,Novel000042,FBgn0033855,FBgn0000535,FBgn0027581,FBgn0036916,FBgn0030613,FBgn0028387,FBgn0003016,FBgn0030600,FBgn0034503,FBgn0266489,FBgn0034265,FBgn0000546,FBgn0031905,FBgn0031196,FBgn0037546,FBgn0028868,FBgn0029531,FBgn0029657,FBgn0037539,FBgn0022740,FBgn0005655	-|-|-|-|-|-|-|-|-|-|-|-|-|-|-|-|-|-|-|-|-|-|-|-|-|-|-|-|-|
GO:0015291	secondary active transmembrane transporter activity	molecular_function	0.92504	1	1	366	72	10392	FBgn0029663	-|
GO:1901068	guanosine-containing compound metabolic process	biological_process	0.92504	1	1	366	72	10392	FBgn0033834	-|
GO:0006418	tRNA aminoacylation for protein translation	biological_process	0.92505	1	1	366	72	10392	FBgn0029664	-|
GO:0004812	aminoacyl-tRNA ligase activity	molecular_function	0.92505	1	1	366	72	10392	FBgn0029664	-|
GO:0006030	chitin metabolic process	biological_process	0.9262	1	2	366	119	10392	FBgn0052499,FBgn0027600	-|-|
GO:1901071	glucosamine-containing compound metabolic process	biological_process	0.9262	1	2	366	119	10392	FBgn0027600,FBgn0052499	-|-|
GO:0015995	chlorophyll biosynthetic process	biological_process	0.92768	1	1	366	73	10392	FBgn0028868	-|
GO:0006040	amino sugar metabolic process	biological_process	0.92833	1	2	366	120	10392	FBgn0052499,FBgn0027600	-|-|
GO:0031329	regulation of cellular catabolic process	biological_process	0.93026	1	1	366	74	10392	FBgn0031196	-|
GO:0003678	DNA helicase activity	molecular_function	0.93027	1	1	366	74	10392	FBgn0028868	-|
GO:0006310	DNA recombination	biological_process	0.93244	1	2	366	122	10392	FBgn0028868,Novel000042	-|-|
GO:0007265	Ras protein signal transduction	biological_process	0.93271	1	1	366	75	10392	FBgn0025836	-|
GO:0046578	regulation of Ras protein signal transduction	biological_process	0.93271	1	1	366	75	10392	FBgn0025836	-|
GO:0016875	ligase activity, forming carbon-oxygen bonds	molecular_function	0.93275	1	1	366	75	10392	FBgn0029664	-|
GO:0016876	ligase activity, forming aminoacyl-tRNA and related compounds	molecular_function	0.93275	1	1	366	75	10392	FBgn0029664	-|
GO:0008150	biological_process	biological_process	0.93406	1	260	366	7722	10392	FBgn0021764,FBgn0030615,FBgn0034507,FBgn0086604,FBgn0030600,FBgn0050431,FBgn0003016,FBgn0003448,FBgn0020880,FBgn0033855,FBgn0034265,FBgn0030616,FBgn0034490,FBgn0026738,FBgn0004364,FBgn0033860,FBgn0039942,FBgn0263830,FBgn0085569,FBgn0033844,FBgn0262867,FBgn0036494,FBgn0264389,FBgn0243512,FBgn0032956,FBgn0031957,FBgn0034246,FBgn0052984,FBgn0029663,FBgn0037539,FBgn0053864,FBgn0029662,FBgn0025697,FBg…	-|-|-|-|-|-|-|-|-|-|-|-|-|-|-|-|-|-|-|-|-|-|-|-|-|-|-|-|-|-|-|-|-|-|-|-|-|-|-|-|-|-|-|-|-|-|-|-|-|-|-|-|-|-|-|-|-|-|-|-|-|-|-|-|-|-|-|-|-|-|-|-|-|-|-|-|-|-|-|-|-|-|-|-|-|-|-|-|-|-|-|-|-|-|-|-|-|-|-|-|-|-|-|-|-|-|-|-|-|-|-|-|-|-|-|-|-|-|-|-|-|-|-|-|-|-|-|-
GO:0004197	cysteine-type endopeptidase activity	molecular_function	0.93511	1	1	366	76	10392	FBgn0261800	-|
GO:0043038	amino acid activation	biological_process	0.93513	1	1	366	76	10392	FBgn0029664	-|
GO:0043039	tRNA aminoacylation	biological_process	0.93513	1	1	366	76	10392	FBgn0029664	-|
GO:0046872	metal ion binding	molecular_function	0.93695	1	48	366	1642	10392	FBgn0028979,FBgn0259221,FBgn0261574,FBgn0004228,FBgn0040294,FBgn0030610,FBgn0260953,FBgn0036497,FBgn0030613,FBgn0003475,Novel000089,FBgn0036923,FBgn0032979,FBgn0033828,FBgn0034488,FBgn0262519,FBgn0265576,FBgn0036926,FBgn0013303,FBgn0001983,FBgn0052984,FBgn0261802,FBgn0002938,FBgn0033065,FBgn0039941,FBgn0262360,FBgn0032956,FBgn0033855,FBgn0039946,FBgn0003448,FBgn0030600,FBgn0050431,FBgn0028387,FBg…	-|-|-|-|-|-|-|-|-|-|-|-|-|-|-|-|-|-|-|-|-|-|-|-|-|-|-|-|-|-|-|-|-|-|-|-|-|-|-|-|-|-|-|-|-|-|-|-|
GO:0046906	tetrapyrrole binding	molecular_function	0.93735	1	3	366	167	10392	FBgn0033065,FBgn0036497,FBgn0030615	-|-|-|
GO:0015994	chlorophyll metabolic process	biological_process	0.93741	1	1	366	77	10392	FBgn0028868	-|
GO:0009894	regulation of catabolic process	biological_process	0.93743	1	1	366	77	10392	FBgn0031196	-|
GO:0031323	regulation of cellular metabolic process	biological_process	0.93855	1	30	366	1084	10392	FBgn0031904,FBgn0036932,FBgn0001138,FBgn0032184,Novel000040,FBgn0263994,FBgn0021764,FBgn0262519,Novel000042,FBgn0000535,FBgn0033855,FBgn0030613,FBgn0036916,FBgn0027581,FBgn0034503,FBgn0030600,FBgn0028387,FBgn0003016,FBgn0266489,FBgn0000546,FBgn0034265,FBgn0037546,FBgn0031196,FBgn0031905,FBgn0029657,FBgn0028868,FBgn0029531,FBgn0005655,FBgn0037539,FBgn0022740	-|-|-|-|-|-|-|-|-|-|-|-|-|-|-|-|-|-|-|-|-|-|-|-|-|-|-|-|-|-|
GO:0080090	regulation of primary metabolic process	biological_process	0.9412	1	29	366	1056	10392	FBgn0031904,FBgn0001138,FBgn0032184,FBgn0263994,Novel000040,FBgn0262519,FBgn0021764,Novel000042,FBgn0033855,FBgn0000535,FBgn0030613,FBgn0036916,FBgn0027581,FBgn0030600,FBgn0034503,FBgn0028387,FBgn0003016,FBgn0266489,FBgn0000546,FBgn0034265,FBgn0031196,FBgn0037546,FBgn0031905,FBgn0029657,FBgn0029531,FBgn0028868,FBgn0005655,FBgn0037539,FBgn0022740	-|-|-|-|-|-|-|-|-|-|-|-|-|-|-|-|-|-|-|-|-|-|-|-|-|-|-|-|-|
GO:0048869	cellular developmental process	biological_process	0.94385	1	1	366	80	10392	FBgn0033074	-|
GO:0004866	endopeptidase inhibitor activity	molecular_function	0.94586	1	1	366	81	10392	FBgn0261630	-|
GO:0061135	endopeptidase regulator activity	molecular_function	0.94586	1	1	366	81	10392	FBgn0261630	-|
GO:0044260	cellular macromolecule metabolic process	biological_process	0.94808	1	95	366	3076	10392	Novel000089,FBgn0032184,FBgn0025720,FBgn0051702,FBgn0262519,FBgn0000535,FBgn0243512,FBgn0037549,FBgn0052791,FBgn0033859,FBgn0034246,FBgn0034276,FBgn0002938,FBgn0261802,FBgn0043456,FBgn0031196,FBgn0034277,FBgn0034258,FBgn0031905,FBgn0032956,FBgn0052220,FBgn0053864,FBgn0036924,FBgn0044872,FBgn0025616,FBgn0029657,FBgn0029123,FBgn0029667,FBgn0001983,FBgn0037539,FBgn0051703,Novel000040,FBgn0021764,FBg…	-|-|-|-|-|-|-|-|-|-|-|-|-|-|-|-|-|-|-|-|-|-|-|-|-|-|-|-|-|-|-|-|-|-|-|-|-|-|-|-|-|-|-|-|-|-|-|-|-|-|-|-|-|-|-|-|-|-|-|-|-|-|-|-|-|-|-|-|-|-|-|-|-|-|-|-|-|-|-|-|-|-|-|-|-|-|-|-|-|-|-|-|-|-|-|
GO:0046914	transition metal ion binding	molecular_function	0.94915	1	29	366	1068	10392	FBgn0033828,FBgn0262519,FBgn0029661,FBgn0032955,Novel000089,FBgn0001138,FBgn0030615,FBgn0036923,FBgn0050431,FBgn0260953,FBgn0030600,FBgn0028387,FBgn0045038,FBgn0030613,FBgn0029128,FBgn0033855,FBgn0040294,FBgn0004228,FBgn0030610,FBgn0033065,FBgn0037546,FBgn0039941,FBgn0262360,FBgn0032956,FBgn0000546,FBgn0261802,FBgn0051835,FBgn0052984,FBgn0033856	-|-|-|-|-|-|-|-|-|-|-|-|-|-|-|-|-|-|-|-|-|-|-|-|-|-|-|-|-|
GO:0043169	cation binding	molecular_function	0.95096	1	48	366	1667	10392	FBgn0013303,FBgn0052984,FBgn0001983,FBgn0002938,FBgn0261802,FBgn0033065,FBgn0262360,FBgn0039941,FBgn0032956,FBgn0259221,FBgn0004228,FBgn0261574,FBgn0040294,FBgn0030610,FBgn0028979,FBgn0036497,FBgn0030613,FBgn0003475,FBgn0260953,FBgn0036923,FBgn0032979,Novel000089,FBgn0265576,FBgn0036926,FBgn0034488,FBgn0033828,FBgn0262519,FBgn0033856,FBgn0265835,FBgn0040805,FBgn0034481,FBgn0051835,FBgn0000546,FBg…	-|-|-|-|-|-|-|-|-|-|-|-|-|-|-|-|-|-|-|-|-|-|-|-|-|-|-|-|-|-|-|-|-|-|-|-|-|-|-|-|-|-|-|-|-|-|-|-|
GO:0046148	pigment biosynthetic process	biological_process	0.95128	1	2	366	133	10392	FBgn0028868,FBgn0034276	-|-|
GO:0016740	transferase activity	molecular_function	0.95256	1	42	366	1484	10392	FBgn0034248,FBgn0037543,FBgn0036927,FBgn0028868,FBgn0086368,FBgn0033844,FBgn0032078,FBgn0031951,FBgn0259683,FBgn0053121,FBgn0028387,FBgn0032168,Novel000211,FBgn0020880,FBgn0039946,FBgn0030612,FBgn0036915,FBgn0025837,FBgn0001138,FBgn0034269,FBgn0261800,FBgn0044872,FBgn0053156,FBgn0033065,FBgn0013765,FBgn0033853,FBgn0260006,FBgn0034246,FBgn0263144,FBgn0034276,FBgn0002938,FBgn0083968,FBgn0085224,FBg…	-|-|-|-|-|-|-|-|-|-|-|-|-|-|-|-|-|-|-|-|-|-|-|-|-|-|-|-|-|-|-|-|-|-|-|-|-|-|-|-|-|-|
GO:0019538	protein metabolic process	biological_process	0.95345	1	53	366	1826	10392	FBgn0034507,FBgn0001138,FBgn0051703,FBgn0029672,FBgn0030617,FBgn0031187,FBgn0032168,FBgn0050431,FBgn0036918,FBgn0032549,FBgn0026738,FBgn0030616,FBgn0034249,FBgn0259683,FBgn0000546,FBgn0260964,FBgn0259998,FBgn0086368,FBgn0032172,FBgn0034270,FBgn0037543,FBgn0011272,FBgn0032083,FBgn0033860,FBgn0031952,FBgn0010411,FBgn0031912,FBgn0031904,FBgn0262866,FBgn0032969,FBgn0051702,FBgn0025720,FBgn0015288,FBg…	-|-|-|-|-|-|-|-|-|-|-|-|-|-|-|-|-|-|-|-|-|-|-|-|-|-|-|-|-|-|-|-|-|-|-|-|-|-|-|-|-|-|-|-|-|-|-|-|-|-|-|-|-|
GO:0004252	serine-type endopeptidase activity	molecular_function	0.95697	1	7	366	338	10392	FBgn0032549,FBgn0032969,FBgn0019928,FBgn0015316,FBgn0259998,FBgn0030617,FBgn0034507	-|-|-|-|-|-|-|
GO:0008270	zinc ion binding	molecular_function	0.95742	1	22	366	855	10392	FBgn0029661,FBgn0262519,FBgn0033828,FBgn0036923,Novel000089,FBgn0001138,FBgn0045038,FBgn0029128,FBgn0028387,FBgn0050431,FBgn0260953,FBgn0030600,FBgn0040294,FBgn0004228,FBgn0033855,FBgn0000546,FBgn0032956,FBgn0262360,FBgn0039941,FBgn0051835,FBgn0261802,FBgn0052984	-|-|-|-|-|-|-|-|-|-|-|-|-|-|-|-|-|-|-|-|-|-|
GO:0012505	endomembrane system	cellular_component	0.95791	1	3	366	182	10392	FBgn0034277,FBgn0036924,FBgn0266429	-|-|-|
GO:0042440	pigment metabolic process	biological_process	0.95934	1	2	366	139	10392	FBgn0034276,FBgn0028868	-|-|
GO:0016310	phosphorylation	biological_process	0.96012	1	6	366	304	10392	FBgn0259683,FBgn0262866,FBgn0002938,Novel000089,FBgn0029672,Novel000234	-|-|-|-|-|-|
GO:0008134	transcription factor binding	molecular_function	0.96087	1	1	366	90	10392	FBgn0028868	-|
GO:0016773	phosphotransferase activity, alcohol group as acceptor	molecular_function	0.96156	1	10	366	453	10392	FBgn0262866,FBgn0036915,FBgn0033853,FBgn0002938,FBgn0034248,FBgn0039946,FBgn0020880,FBgn0031914,FBgn0031951,FBgn0053156	-|-|-|-|-|-|-|-|-|-|
GO:0034062	RNA polymerase activity	molecular_function	0.96287	1	2	366	142	10392	FBgn0001138,FBgn0053121	-|-|
GO:0009057	macromolecule catabolic process	biological_process	0.96321	1	3	366	187	10392	FBgn0032956,FBgn0025720,FBgn0031187	-|-|-|
GO:0005230	extracellular ligand-gated ion channel activity	molecular_function	0.96361	1	1	366	92	10392	FBgn0259683	-|
GO:0008234	cysteine-type peptidase activity	molecular_function	0.96361	1	1	366	92	10392	FBgn0261800	-|
GO:0030554	adenyl nucleotide binding	molecular_function	0.96477	1	25	366	968	10392	FBgn0000633,FBgn0031955,FBgn0014877,FBgn0029664,FBgn0261802,FBgn0034246,FBgn0002938,FBgn0034496,FBgn0029123,FBgn0034493,FBgn0085569,FBgn0032167,FBgn0028868,FBgn0034274,FBgn0001099,FBgn0262519,FBgn0262866,FBgn0003545,FBgn0036931,FBgn0037549,FBgn0036497,FBgn0051755,FBgn0028377,FBgn0016701,FBgn0030612	-|-|-|-|-|-|-|-|-|-|-|-|-|-|-|-|-|-|-|-|-|-|-|-|-|
GO:0006022	aminoglycan metabolic process	biological_process	0.96612	1	2	366	145	10392	FBgn0052499,FBgn0027600	-|-|
GO:0004672	protein kinase activity	molecular_function	0.9687	1	6	366	315	10392	FBgn0020880,FBgn0031914,FBgn0002938,FBgn0031951,FBgn0034248,FBgn0262866	-|-|-|-|-|-|
GO:0006260	DNA replication	biological_process	0.96927	1	4	366	236	10392	FBgn0030612,Novel000089,Novel000211,FBgn0005655	-|-|-|-|
GO:0005524	ATP binding	molecular_function	0.97174	1	24	366	951	10392	FBgn0262519,FBgn0262866,FBgn0001099,FBgn0003545,FBgn0036931,FBgn0037549,FBgn0036497,FBgn0028377,FBgn0051755,FBgn0030612,FBgn0016701,FBgn0029664,FBgn0031955,FBgn0000633,FBgn0261802,FBgn0002938,FBgn0034496,FBgn0034246,FBgn0034493,FBgn0085569,FBgn0029123,FBgn0028868,FBgn0032167,FBgn0034274	-|-|-|-|-|-|-|-|-|-|-|-|-|-|-|-|-|-|-|-|-|-|-|-|
GO:0032559	adenyl ribonucleotide binding	molecular_function	0.97213	1	24	366	952	10392	FBgn0003545,FBgn0036931,FBgn0262866,FBgn0262519,FBgn0001099,FBgn0028377,FBgn0051755,FBgn0030612,FBgn0016701,FBgn0037549,FBgn0036497,FBgn0261802,FBgn0034496,FBgn0002938,FBgn0034246,FBgn0029664,FBgn0031955,FBgn0000633,FBgn0034274,FBgn0085569,FBgn0034493,FBgn0029123,FBgn0028868,FBgn0032167	-|-|-|-|-|-|-|-|-|-|-|-|-|-|-|-|-|-|-|-|-|-|-|-|
GO:0006952	defense response	biological_process	0.97265	1	2	366	152	10392	FBgn0033075,FBgn0031959	-|-|
GO:1901360	organic cyclic compound metabolic process	biological_process	0.97433	1	74	366	2526	10392	FBgn0050109,FBgn0053121,FBgn0037546,FBgn0034265,FBgn0000546,FBgn0053870,FBgn0029531,FBgn0051703,FBgn0021764,Novel000040,FBgn0033855,FBgn0030612,Novel000042,FBgn0034503,FBgn0030600,FBgn0053868,FBgn0003016,FBgn0261802,FBgn0043456,FBgn0034246,FBgn0034276,FBgn0031196,FBgn0033065,FBgn0031905,FBgn0033853,FBgn0261800,FBgn0052220,FBgn0053864,FBgn0037539,FBgn0029657,Novel000089,FBgn0032184,FBgn0051702,FBg…	-|-|-|-|-|-|-|-|-|-|-|-|-|-|-|-|-|-|-|-|-|-|-|-|-|-|-|-|-|-|-|-|-|-|-|-|-|-|-|-|-|-|-|-|-|-|-|-|-|-|-|-|-|-|-|-|-|-|-|-|-|-|-|-|-|-|-|-|-|-|-|-|-|-|
GO:0008236	serine-type peptidase activity	molecular_function	0.97616	1	8	366	404	10392	FBgn0034507,FBgn0031912,FBgn0032969,FBgn0019928,FBgn0015316,FBgn0259998,FBgn0030617,FBgn0032549	-|-|-|-|-|-|-|-|
GO:0017171	serine hydrolase activity	molecular_function	0.97616	1	8	366	404	10392	FBgn0015316,FBgn0259998,FBgn0030617,FBgn0019928,FBgn0032549,FBgn0034507,FBgn0031912,FBgn0032969	-|-|-|-|-|-|-|-|
GO:0016853	isomerase activity	molecular_function	0.97644	1	1	366	104	10392	FBgn0043456	-|
GO:0020037	heme binding	molecular_function	0.97797	1	2	366	159	10392	FBgn0033065,FBgn0030615	-|-|
GO:0005179	hormone activity	molecular_function	0.97808	1	1	366	106	10392	FBgn0011705	-|
GO:0090304	nucleic acid metabolic process	biological_process	0.97836	1	59	366	2084	10392	FBgn0034276,FBgn0266489,FBgn0034246,FBgn0263144,FBgn0043456,FBgn0261802,FBgn0053873,FBgn0031905,FBgn0029664,FBgn0031196,FBgn0053864,FBgn0052220,FBgn0029657,FBgn0037539,FBgn0033072,FBgn0031904,FBgn0032184,Novel000089,FBgn0262519,FBgn0003559,FBgn0051702,FBgn0263774,FBgn0000535,FBgn0027581,FBgn0030613,FBgn0033859,FBgn0052791,FBgn0053858,FBgn0014037,FBgn0053121,FBgn0053861,FBgn0034265,FBgn0000546,FBg…	-|-|-|-|-|-|-|-|-|-|-|-|-|-|-|-|-|-|-|-|-|-|-|-|-|-|-|-|-|-|-|-|-|-|-|-|-|-|-|-|-|-|-|-|-|-|-|-|-|-|-|-|-|-|-|-|-|-|-|
GO:0046483	heterocycle metabolic process	biological_process	0.97853	1	72	366	2483	10392	FBgn0028868,FBgn0005655,FBgn0037543,FBgn0053872,FBgn0053869,FBgn0022740,FBgn0033834,FBgn0034274,FBgn0034249,FBgn0053861,Novel000211,FBgn0036916,FBgn0023416,FBgn0028387,FBgn0053871,FBgn0263994,FBgn0036915,FBgn0001138,FBgn0053156,FBgn0053873,FBgn0029664,FBgn0263144,FBgn0266489,Novel000234,FBgn0030613,FBgn0027581,FBgn0053858,FBgn0014037,FBgn0004852,FBgn0034489,FBgn0263774,FBgn0003559,FBgn0031904,FBg…	-|-|-|-|-|-|-|-|-|-|-|-|-|-|-|-|-|-|-|-|-|-|-|-|-|-|-|-|-|-|-|-|-|-|-|-|-|-|-|-|-|-|-|-|-|-|-|-|-|-|-|-|-|-|-|-|-|-|-|-|-|-|-|-|-|-|-|-|-|-|-|-|
GO:0006725	cellular aromatic compound metabolic process	biological_process	0.97853	1	72	366	2483	10392	FBgn0027581,FBgn0030613,FBgn0014037,FBgn0053858,FBgn0004852,FBgn0034489,FBgn0003559,FBgn0263774,FBgn0033072,FBgn0031904,FBgn0053156,FBgn0053873,FBgn0029664,FBgn0266489,FBgn0263144,Novel000234,FBgn0036916,FBgn0023416,Novel000211,FBgn0028387,FBgn0053871,FBgn0263994,FBgn0036915,FBgn0001138,FBgn0028868,FBgn0053872,FBgn0053869,FBgn0022740,FBgn0037543,FBgn0005655,FBgn0034274,FBgn0033834,FBgn0034249,FBg…	-|-|-|-|-|-|-|-|-|-|-|-|-|-|-|-|-|-|-|-|-|-|-|-|-|-|-|-|-|-|-|-|-|-|-|-|-|-|-|-|-|-|-|-|-|-|-|-|-|-|-|-|-|-|-|-|-|-|-|-|-|-|-|-|-|-|-|-|-|-|-|-|
GO:0006139	nucleobase-containing compound metabolic process	biological_process	0.97939	1	68	366	2365	10392	FBgn0000535,FBgn0052791,FBgn0033859,Novel000089,FBgn0032184,FBgn0051702,FBgn0262519,FBgn0031941,FBgn0052220,FBgn0053864,FBgn0037539,FBgn0029657,FBgn0261802,FBgn0043456,FBgn0034246,FBgn0034276,FBgn0031196,FBgn0031905,FBgn0033853,FBgn0033855,Novel000042,FBgn0030612,FBgn0053868,FBgn0034503,FBgn0030600,FBgn0003016,FBgn0051703,FBgn0021764,Novel000040,FBgn0053870,FBgn0029531,FBgn0050109,FBgn0053121,FBg…	-|-|-|-|-|-|-|-|-|-|-|-|-|-|-|-|-|-|-|-|-|-|-|-|-|-|-|-|-|-|-|-|-|-|-|-|-|-|-|-|-|-|-|-|-|-|-|-|-|-|-|-|-|-|-|-|-|-|-|-|-|-|-|-|-|-|-|-|
GO:0016301	kinase activity	molecular_function	0.97952	1	10	366	486	10392	FBgn0028868,FBgn0034248,FBgn0053156,FBgn0031951,FBgn0020880,FBgn0031914,FBgn0033853,FBgn0036915,FBgn0262866,FBgn0002938	-|-|-|-|-|-|-|-|-|-|
GO:0006779	porphyrin-containing compound biosynthetic process	biological_process	0.97961	1	1	366	108	10392	FBgn0028868	-|
GO:0019012	virion	cellular_component	0.98033	1	9	366	451	10392	FBgn0261802,FBgn0040805,FBgn0031910,FBgn0031950,FBgn0040099,FBgn0265002,FBgn0029535,FBgn0032167,FBgn0243512	-|-|-|-|-|-|-|-|-|
GO:0001071	nucleic acid binding transcription factor activity	molecular_function	0.98045	1	7	366	375	10392	FBgn0033855,FBgn0001138,FBgn0028387,FBgn0031196,FBgn0037546,FBgn0000546,FBgn0029657	-|-|-|-|-|-|-|
GO:0003700	sequence-specific DNA binding transcription factor activity	molecular_function	0.98045	1	7	366	375	10392	FBgn0001138,FBgn0033855,FBgn0029657,FBgn0000546,FBgn0031196,FBgn0037546,FBgn0028387	-|-|-|-|-|-|-|
GO:0008152	metabolic process	biological_process	0.981	1	178	366	5592	10392	Novel000211,FBgn0036918,FBgn0028387,FBgn0034251,FBgn0053871,FBgn0263994,FBgn0036915,FBgn0013746,FBgn0029006,FBgn0032955,FBgn0034491,FBgn0028868,FBgn0037543,FBgn0053869,FBgn0033834,FBgn0260964,FBgn0086368,FBgn0034249,FBgn0033830,FBgn0028370,FBgn0036497,FBgn0030613,FBgn0027581,FBgn0053858,FBgn0014037,FBgn0015288,FBgn0004852,FBgn0027529,FBgn0034500,FBgn0003559,FBgn0032969,FBgn0033072,FBgn0025836,FBg…	-|-|-|-|-|-|-|-|-|-|-|-|-|-|-|-|-|-|-|-|-|-|-|-|-|-|-|-|-|-|-|-|-|-|-|-|-|-|-|-|-|-|-|-|-|-|-|-|-|-|-|-|-|-|-|-|-|-|-|-|-|-|-|-|-|-|-|-|-|-|-|-|-|-|-|-|-|-|-|-|-|-|-|-|-|-|-|-|-|-|-|-|-|-|-|-|-|-|-|-|-|-|-|-|-|-|-|-|-|-|-|-|-|-|-|-|-|-|-|-|-|-|-|-|-|-|-|-
GO:0016779	nucleotidyltransferase activity	molecular_function	0.98113	1	4	366	255	10392	Novel000211,FBgn0001138,Novel000089,FBgn0053121	-|-|-|-|
GO:0005549	odorant binding	molecular_function	0.98238	1	1	366	112	10392	FBgn0011283	-|
GO:0034641	cellular nitrogen compound metabolic process	biological_process	0.98285	1	73	366	2535	10392	FBgn0053871,Novel000211,FBgn0036916,FBgn0023416,FBgn0028387,FBgn0001138,FBgn0263994,FBgn0036915,FBgn0033834,FBgn0034274,FBgn0028868,FBgn0005655,FBgn0053872,FBgn0037543,FBgn0053869,FBgn0022740,FBgn0053861,FBgn0034249,FBgn0004852,FBgn0030613,FBgn0036497,FBgn0027581,FBgn0053858,FBgn0014037,FBgn0031904,FBgn0033072,FBgn0263774,FBgn0003559,FBgn0053156,FBgn0266489,FBgn0263144,Novel000234,FBgn0053873,FBg…	-|-|-|-|-|-|-|-|-|-|-|-|-|-|-|-|-|-|-|-|-|-|-|-|-|-|-|-|-|-|-|-|-|-|-|-|-|-|-|-|-|-|-|-|-|-|-|-|-|-|-|-|-|-|-|-|-|-|-|-|-|-|-|-|-|-|-|-|-|-|-|-|-|
GO:0044238	primary metabolic process	biological_process	0.98316	1	139	366	4491	10392	FBgn0025837,FBgn0021764,Novel000040,FBgn0034507,FBgn0051703,FBgn0030600,FBgn0050431,FBgn0003016,FBgn0033855,FBgn0030612,FBgn0030607,FBgn0030616,FBgn0034265,FBgn0026738,FBgn0053121,FBgn0033860,FBgn0036927,FBgn0033844,FBgn0033856,FBgn0262519,FBgn0032973,FBgn0031941,FBgn0052791,FBgn0037549,FBgn0243512,FBgn0000535,FBgn0032956,FBgn0261802,FBgn0034246,FBgn0031957,FBgn0034276,FBgn0029123,FBgn0040099,FBg…	-|-|-|-|-|-|-|-|-|-|-|-|-|-|-|-|-|-|-|-|-|-|-|-|-|-|-|-|-|-|-|-|-|-|-|-|-|-|-|-|-|-|-|-|-|-|-|-|-|-|-|-|-|-|-|-|-|-|-|-|-|-|-|-|-|-|-|-|-|-|-|-|-|-|-|-|-|-|-|-|-|-|-|-|-|-|-|-|-|-|-|-|-|-|-|-|-|-|-|-|-|-|-|-|-|-|-|-|-|-|-|-|-|-|-|-|-|-|-|-|-|-|-|-|-|-|-|-
GO:0003824	catalytic activity	molecular_function	0.98604	1	148	366	4771	10392	FBgn0051703,FBgn0030615,FBgn0034507,FBgn0025837,FBgn0027343,FBgn0030612,FBgn0264895,FBgn0020880,FBgn0053121,FBgn0004638,FBgn0030616,FBgn0031951,FBgn0033844,FBgn0033856,FBgn0033860,FBgn0036927,FBgn0034248,FBgn0263830,FBgn0036494,FBgn0262519,FBgn0032973,FBgn0034488,FBgn0037547,FBgn0004228,FBgn0032957,FBgn0243512,FBgn0037549,FBgn0034276,FBgn0034246,FBgn0031957,FBgn0261802,FBgn0033065,FBgn0029662,FBg…	-|-|-|-|-|-|-|-|-|-|-|-|-|-|-|-|-|-|-|-|-|-|-|-|-|-|-|-|-|-|-|-|-|-|-|-|-|-|-|-|-|-|-|-|-|-|-|-|-|-|-|-|-|-|-|-|-|-|-|-|-|-|-|-|-|-|-|-|-|-|-|-|-|-|-|-|-|-|-|-|-|-|-|-|-|-|-|-|-|-|-|-|-|-|-|-|-|-|-|-|-|-|-|-|-|-|-|-|-|-|-|-|-|-|-|-|-|-|-|-|-|-|-|-|-|-|-|-
GO:0019031	viral envelope	cellular_component	0.98857	1	2	366	180	10392	FBgn0040099,FBgn0040805	-|-|
GO:0036338	viral membrane	cellular_component	0.98857	1	2	366	180	10392	FBgn0040805,FBgn0040099	-|-|
GO:0071704	organic substance metabolic process	biological_process	0.98899	1	147	366	4766	10392	FBgn0053868,FBgn0034503,FBgn0032168,FBgn0032549,FBgn0031187,Novel000042,FBgn0025687,FBgn0011272,FBgn0027572,FBgn0052499,FBgn0031952,FBgn0029531,FBgn0259998,FBgn0053870,FBgn0037546,FBgn0000546,FBgn0050109,FBgn0032972,FBgn0033859,FBgn0031948,FBgn0025720,FBgn0001099,FBgn0051702,FBgn0002524,Novel000089,FBgn0031912,FBgn0032184,FBgn0029667,FBgn0001983,FBgn0031907,FBgn0025616,FBgn0029657,FBgn0015316,FBg…	-|-|-|-|-|-|-|-|-|-|-|-|-|-|-|-|-|-|-|-|-|-|-|-|-|-|-|-|-|-|-|-|-|-|-|-|-|-|-|-|-|-|-|-|-|-|-|-|-|-|-|-|-|-|-|-|-|-|-|-|-|-|-|-|-|-|-|-|-|-|-|-|-|-|-|-|-|-|-|-|-|-|-|-|-|-|-|-|-|-|-|-|-|-|-|-|-|-|-|-|-|-|-|-|-|-|-|-|-|-|-|-|-|-|-|-|-|-|-|-|-|-|-|-|-|-|-|-
GO:0006807	nitrogen compound metabolic process	biological_process	0.98932	1	80	366	2792	10392	FBgn0053861,FBgn0034249,FBgn0027600,FBgn0033834,FBgn0034274,FBgn0005655,FBgn0053869,FBgn0053872,FBgn0022740,FBgn0037543,FBgn0028868,FBgn0001138,FBgn0036915,FBgn0263994,FBgn0053871,FBgn0028387,Novel000211,FBgn0036916,FBgn0023416,Novel000234,FBgn0263144,FBgn0266489,FBgn0029664,FBgn0053873,FBgn0053156,FBgn0031904,FBgn0033072,FBgn0263774,FBgn0003559,FBgn0034489,FBgn0004852,FBgn0053858,FBgn0014037,FBg…	-|-|-|-|-|-|-|-|-|-|-|-|-|-|-|-|-|-|-|-|-|-|-|-|-|-|-|-|-|-|-|-|-|-|-|-|-|-|-|-|-|-|-|-|-|-|-|-|-|-|-|-|-|-|-|-|-|-|-|-|-|-|-|-|-|-|-|-|-|-|-|-|-|-|-|-|-|-|-|-|
GO:0016787	hydrolase activity	molecular_function	0.99114	1	62	366	2256	10392	FBgn0260475,FBgn0034496,FBgn0031906,FBgn0052985,FBgn0050109,FBgn0004638,FBgn0037551,FBgn0034249,FBgn0031959,FBgn0033834,FBgn0051619,FBgn0034274,FBgn0004177,FBgn0259998,FBgn0033856,FBgn0027600,FBgn0034491,FBgn0033860,FBgn0031952,FBgn0028868,FBgn0027279,FBgn0001138,FBgn0010812,FBgn0034507,FBgn0003545,FBgn0000119,FBgn0024556,FBgn0031187,FBgn0030617,FBgn0051755,FBgn0032549,FBgn0034246,FBgn0002938,FBg…	-|-|-|-|-|-|-|-|-|-|-|-|-|-|-|-|-|-|-|-|-|-|-|-|-|-|-|-|-|-|-|-|-|-|-|-|-|-|-|-|-|-|-|-|-|-|-|-|-|-|-|-|-|-|-|-|-|-|-|-|-|-|
GO:0044423	virion part	cellular_component	0.99135	1	7	366	411	10392	FBgn0031950,FBgn0040805,FBgn0032167,FBgn0029535,FBgn0265002,FBgn0031910,FBgn0040099	-|-|-|-|-|-|-|
GO:0051701	interaction with host	biological_process	0.99206	1	1	366	134	10392	FBgn0013746	-|
GO:0033014	tetrapyrrole biosynthetic process	biological_process	0.99235	1	1	366	135	10392	FBgn0028868	-|
GO:0016772	transferase activity, transferring phosphorus-containing groups	molecular_function	0.99242	1	18	366	828	10392	FBgn0033853,FBgn0002938,FBgn0053121,FBgn0028868,FBgn0034248,FBgn0031951,FBgn0053156,FBgn0033844,FBgn0261800,FBgn0262866,FBgn0036915,Novel000089,FBgn0001138,Novel000211,FBgn0031948,FBgn0039946,FBgn0020880,FBgn0031914	-|-|-|-|-|-|-|-|-|-|-|-|-|-|-|-|-|-|
GO:0006468	protein phosphorylation	biological_process	0.99527	1	3	366	259	10392	FBgn0029672,FBgn0002938,FBgn0262866	-|-|-|
GO:0006281	DNA repair	biological_process	0.99739	1	2	366	226	10392	FBgn0028868,FBgn0005655	-|-|
GO:0006974	response to DNA damage stimulus	biological_process	0.99799	1	2	366	234	10392	FBgn0005655,FBgn0028868	-|-|
GO:0006259	DNA metabolic process	biological_process	0.99859	1	10	366	610	10392	FBgn0053864,Novel000042,FBgn0030612,Novel000211,FBgn0028868,FBgn0005655,FBgn0053858,FBgn0037543,FBgn0053861,Novel000089	-|-|-|-|-|-|-|-|-|-|
GO:0043170	macromolecule metabolic process	biological_process	0.99867	1	108	366	3814	10392	FBgn0069973,FBgn0015288,FBgn0014037,FBgn0053858,FBgn0027581,FBgn0032987,FBgn0030613,FBgn0010411,FBgn0036932,FBgn0033072,FBgn0031904,FBgn0262866,FBgn0003559,FBgn0032969,FBgn0263774,FBgn0266429,FBgn0019928,FBgn0263144,FBgn0266489,FBgn0014877,FBgn0029664,FBgn0053873,FBgn0053871,FBgn0030617,FBgn0029672,FBgn0028387,FBgn0036916,FBgn0036918,Novel000211,FBgn0001138,FBgn0013746,FBgn0263994,FBgn0027600,FBg…	-|-|-|-|-|-|-|-|-|-|-|-|-|-|-|-|-|-|-|-|-|-|-|-|-|-|-|-|-|-|-|-|-|-|-|-|-|-|-|-|-|-|-|-|-|-|-|-|-|-|-|-|-|-|-|-|-|-|-|-|-|-|-|-|-|-|-|-|-|-|-|-|-|-|-|-|-|-|-|-|-|-|-|-|-|-|-|-|-|-|-|-|-|-|-|-|-|-|-|-|-|-|-|-|-|-|-|-|
GO:0033554	cellular response to stress	biological_process	0.99873	1	2	366	248	10392	FBgn0028868,FBgn0005655	-|-|
GO:0006508	proteolysis	biological_process	0.99945	1	12	366	731	10392	FBgn0259998,FBgn0015316,FBgn0031187,FBgn0019928,FBgn0032972,FBgn0032549,FBgn0033860,FBgn0031912,FBgn0034507,FBgn0025720,FBgn0032956,FBgn0032969	-|-|-|-|-|-|-|-|-|-|-|-|
GO:0006950	response to stress	biological_process	0.99947	1	6	366	478	10392	FBgn0033075,Novel000234,FBgn0028868,FBgn0036929,FBgn0031959,FBgn0005655	-|-|-|-|-|-|
GO:0008233	peptidase activity	molecular_function	0.99958	1	14	366	823	10392	FBgn0051619,FBgn0019928,FBgn0036924,FBgn0261800,FBgn0259998,FBgn0015316,FBgn0030617,FBgn0034491,FBgn0032549,FBgn0033860,FBgn0032972,FBgn0031912,FBgn0034507,FBgn0032969	-|-|-|-|-|-|-|-|-|-|-|-|-|-|
GO:0004175	endopeptidase activity	molecular_function	0.9997	1	8	366	588	10392	FBgn0261800,FBgn0015316,FBgn0259998,FBgn0030617,FBgn0019928,FBgn0032549,FBgn0034507,FBgn0032969	-|-|-|-|-|-|-|-|
GO:0070011	peptidase activity, acting on L-amino acid peptides	molecular_function	0.99997	1	10	366	759	10392	FBgn0033860,FBgn0032549,FBgn0030617,FBgn0261800,FBgn0259998,FBgn0015316,FBgn0019928,FBgn0032969,FBgn0034507,FBgn0031912	-|-|-|-|-|-|-|-|-|-|

## Sheet: Cis 7 day vs 42 day in FF 
GO_accession	Description	Term_type	Over_represented_pValue	Corrected_pValue	CAD_item	CAD_list	Bg_item	Bg_list	Gene_names	Gene_description
GO:0042600	chorion	cellular_component	6.7801e-05	0.26632	9	605	32	10392	FBgn0038244,FBgn0263258,FBgn0042201,FBgn0000355,FBgn0000356,FBgn0036591,FBgn0000357,FBgn0000358,FBgn0265623	-|-|-|-|-|-|-|-|-|
GO:0003796	lysozyme activity	molecular_function	0.00051627	1	5	605	13	10392	FBgn0034165,FBgn0025827,FBgn0046999,FBgn0034162,FBgn0083228	-|-|-|-|-|
GO:0030312	external encapsulating structure	cellular_component	0.0032284	1	9	605	52	10392	FBgn0000357,FBgn0000358,FBgn0265623,FBgn0000356,FBgn0042201,FBgn0000355,FBgn0036591,FBgn0038244,FBgn0263258	-|-|-|-|-|-|-|-|-|
GO:0004482	mRNA (guanine-N7-)-methyltransferase activity	molecular_function	0.0032631	1	2	605	2	10392	FBgn0261697,FBgn0261683	-|-|
GO:0004483	mRNA (nucleoside-2'-O-)-methyltransferase activity	molecular_function	0.0032631	1	2	605	2	10392	FBgn0261697,FBgn0261683	-|-|
GO:0031344	regulation of cell projection organization	biological_process	0.0035068	1	2	605	2	10392	FBgn0263782,FBgn0003882	-|-|
GO:0060491	regulation of cell projection assembly	biological_process	0.0035068	1	2	605	2	10392	FBgn0263782,FBgn0003882	-|-|
GO:1902115	regulation of organelle assembly	biological_process	0.0035068	1	2	605	2	10392	FBgn0003882,FBgn0263782	-|-|
GO:1902208	regulation of bacterial-type flagellum assembly	biological_process	0.0035068	1	2	605	2	10392	FBgn0263782,FBgn0003882	-|-|
GO:0016569	covalent chromatin modification	biological_process	0.003705	1	4	605	12	10392	FBgn0051703,FBgn0051244,FBgn0051702,FBgn0030486	-|-|-|-|
GO:0016570	histone modification	biological_process	0.003705	1	4	605	12	10392	FBgn0051244,FBgn0051703,FBgn0030486,FBgn0051702	-|-|-|-|
GO:0008093	cytoskeletal adaptor activity	molecular_function	0.0037822	1	3	605	6	10392	FBgn0029664,FBgn0000611,FBgn0038659	-|-|-|
GO:0017124	SH3 domain binding	molecular_function	0.0037822	1	3	605	6	10392	FBgn0029664,FBgn0000611,FBgn0038659	-|-|-|
GO:0046847	filopodium assembly	biological_process	0.0037822	1	3	605	6	10392	FBgn0038659,FBgn0029664,FBgn0000611	-|-|-|
GO:0004869	cysteine-type endopeptidase inhibitor activity	molecular_function	0.0055256	1	3	605	7	10392	FBgn0038243,FBgn0004629,FBgn0051313	-|-|-|
GO:0030674	protein binding, bridging	molecular_function	0.005731	1	6	605	29	10392	FBgn0038659,FBgn0000611,FBgn0029664,FBgn0036593,FBgn0051909,FBgn0036929	-|-|-|-|-|-|
GO:0060090	binding, bridging	molecular_function	0.005731	1	6	605	29	10392	FBgn0038659,FBgn0000611,FBgn0029664,FBgn0036593,FBgn0051909,FBgn0036929	-|-|-|-|-|-|
GO:0017016	Ras GTPase binding	molecular_function	0.0081207	1	8	605	49	10392	FBgn0266084,FBgn0023172,FBgn0087013,FBgn0003093,FBgn0003091,FBgn0034205,FBgn0053180,FBgn0004784	-|-|-|-|-|-|-|-|
GO:0031267	small GTPase binding	molecular_function	0.0081207	1	8	605	49	10392	FBgn0004784,FBgn0053180,FBgn0034205,FBgn0023172,FBgn0266084,FBgn0003091,FBgn0087013,FBgn0003093	-|-|-|-|-|-|-|-|
GO:0051020	GTPase binding	molecular_function	0.0081207	1	8	605	49	10392	FBgn0034205,FBgn0053180,FBgn0004784,FBgn0087013,FBgn0003093,FBgn0003091,FBgn0266084,FBgn0023172	-|-|-|-|-|-|-|-|
GO:0031072	heat shock protein binding	molecular_function	0.0088212	1	3	605	8	10392	FBgn0051559,FBgn0029662,FBgn0035852	-|-|-|
GO:0071944	cell periphery	cellular_component	0.0089985	1	21	605	201	10392	FBgn0000358,FBgn0000357,FBgn0031886,FBgn0031894,FBgn0042201,FBgn0085383,FBgn0000611,FBgn0030701,FBgn0010453,FBgn0002901,FBgn0265623,FBgn0262519,FBgn0036612,FBgn0030719,FBgn0005596,FBgn0036591,FBgn0000355,FBgn0000356,FBgn0030895,FBgn0263258,FBgn0038244	-|-|-|-|-|-|-|-|-|-|-|-|-|-|-|-|-|-|-|-|-|
GO:0004930	G-protein coupled receptor activity	molecular_function	0.0091092	1	17	605	150	10392	FBgn0001085,FBgn0036934,FBgn0030466,FBgn0266429,FBgn0087012,FBgn0038653,FBgn0035870,FBgn0034168,FBgn0035847,FBgn0003248,FBgn0029768,FBgn0031770,FBgn0039419,FBgn0037408,FBgn0263512,FBgn0030482,FBgn0053639	-|-|-|-|-|-|-|-|-|-|-|-|-|-|-|-|-|
GO:0008174	mRNA methyltransferase activity	molecular_function	0.0098914	1	2	605	3	10392	FBgn0261683,FBgn0261697	-|-|
GO:0006270	DNA replication initiation	biological_process	0.010992	1	9	605	63	10392	FBgn0264907,FBgn0004512,FBgn0041605,FBgn0038242,FBgn0030904,FBgn0005596,FBgn0000576,FBgn0024555,FBgn0266375	-|-|-|-|-|-|-|-|-|
GO:0044087	regulation of cellular component biogenesis	biological_process	0.012516	1	3	605	9	10392	FBgn0263782,FBgn0031781,FBgn0003882	-|-|-|
GO:0005217	intracellular ligand-gated ion channel activity	molecular_function	0.012766	1	4	605	16	10392	FBgn0266489,FBgn0035845,FBgn0027581,FBgn0011286	-|-|-|-|
GO:0005218	intracellular ligand-gated calcium channel activity	molecular_function	0.012766	1	4	605	16	10392	FBgn0011286,FBgn0027581,FBgn0035845,FBgn0266489	-|-|-|-|
GO:0005219	ryanodine-sensitive calcium-release channel activity	molecular_function	0.012766	1	4	605	16	10392	FBgn0011286,FBgn0027581,FBgn0035845,FBgn0266489	-|-|-|-|
GO:0006874	cellular calcium ion homeostasis	biological_process	0.012766	1	4	605	16	10392	FBgn0011286,FBgn0027581,FBgn0035845,FBgn0266489	-|-|-|-|
GO:0015278	calcium-release channel activity	molecular_function	0.012766	1	4	605	16	10392	FBgn0011286,FBgn0027581,FBgn0035845,FBgn0266489	-|-|-|-|
GO:0055074	calcium ion homeostasis	biological_process	0.012766	1	4	605	16	10392	FBgn0027581,FBgn0011286,FBgn0266489,FBgn0035845	-|-|-|-|
GO:0072503	cellular divalent inorganic cation homeostasis	biological_process	0.012766	1	4	605	16	10392	FBgn0266489,FBgn0035845,FBgn0027581,FBgn0011286	-|-|-|-|
GO:0072507	divalent inorganic cation homeostasis	biological_process	0.012766	1	4	605	16	10392	FBgn0027581,FBgn0011286,FBgn0266489,FBgn0035845	-|-|-|-|
GO:0005750	mitochondrial respiratory chain complex III	cellular_component	0.012778	1	3	605	9	10392	FBgn0263346,FBgn0011227,FBgn0259683	-|-|-|
GO:0006122	mitochondrial electron transport, ubiquinol to cytochrome c	biological_process	0.012778	1	3	605	9	10392	FBgn0263346,FBgn0011227,FBgn0259683	-|-|-|
GO:0045275	respiratory chain complex III	cellular_component	0.012778	1	3	605	9	10392	FBgn0263346,FBgn0011227,FBgn0259683	-|-|-|
GO:0030203	glycosaminoglycan metabolic process	biological_process	0.015059	1	5	605	26	10392	FBgn0083228,FBgn0043575,FBgn0033327,FBgn0043576,FBgn0036612	-|-|-|-|-|
GO:0019899	enzyme binding	molecular_function	0.015763	1	9	605	66	10392	FBgn0004784,FBgn0053180,FBgn0034205,FBgn0023172,FBgn0266084,FBgn0003091,FBgn0087013,FBgn0003093,FBgn0039632	-|-|-|-|-|-|-|-|-|
GO:0005213	structural constituent of chorion	molecular_function	0.016006	1	4	605	17	10392	FBgn0042201,FBgn0265623,FBgn0036591,FBgn0263258	-|-|-|-|
GO:0007292	female gamete generation	biological_process	0.016006	1	4	605	17	10392	FBgn0036591,FBgn0265623,FBgn0042201,FBgn0263258	-|-|-|-|
GO:0007304	chorion-containing eggshell formation	biological_process	0.016006	1	4	605	17	10392	FBgn0036591,FBgn0265623,FBgn0042201,FBgn0263258	-|-|-|-|
GO:0030703	eggshell formation	biological_process	0.016006	1	4	605	17	10392	FBgn0263258,FBgn0042201,FBgn0265623,FBgn0036591	-|-|-|-|
GO:0030707	ovarian follicle cell development	biological_process	0.016006	1	4	605	17	10392	FBgn0036591,FBgn0265623,FBgn0042201,FBgn0263258	-|-|-|-|
GO:0048468	cell development	biological_process	0.016006	1	4	605	17	10392	FBgn0263258,FBgn0042201,FBgn0265623,FBgn0036591	-|-|-|-|
GO:0048477	oogenesis	biological_process	0.016006	1	4	605	17	10392	FBgn0042201,FBgn0036591,FBgn0265623,FBgn0263258	-|-|-|-|
GO:0048878	chemical homeostasis	biological_process	0.017125	1	6	605	36	10392	FBgn0036576,FBgn0266489,FBgn0036932,FBgn0035845,FBgn0027581,FBgn0011286	-|-|-|-|-|-|
GO:0006027	glycosaminoglycan catabolic process	biological_process	0.017348	1	4	605	18	10392	FBgn0043576,FBgn0033327,FBgn0043575,FBgn0083228	-|-|-|-|
GO:0009253	peptidoglycan catabolic process	biological_process	0.017348	1	4	605	18	10392	FBgn0043576,FBgn0083228,FBgn0033327,FBgn0043575	-|-|-|-|
GO:0003006	developmental process involved in reproduction	biological_process	0.017397	1	5	605	26	10392	FBgn0265623,FBgn0036591,FBgn0030468,FBgn0042201,FBgn0263258	-|-|-|-|-|
GO:0071840	cellular component organization or biogenesis	biological_process	0.017445	1	58	605	746	10392	FBgn0001170,FBgn0011743,FBgn0003882,FBgn0266084,FBgn0052791,FBgn0036612,FBgn0030877,FBgn0004456,FBgn0003380,FBgn0266429,FBgn0037244,FBgn0263606,FBgn0005624,FBgn0083228,FBgn0031886,FBgn0027866,FBgn0038189,FBgn0030486,FBgn0051244,FBgn0036932,FBgn0263782,FBgn0030704,FBgn0031777,FBgn0004638,FBgn0030874,FBgn0036920,FBgn0038165,FBgn0035845,FBgn0038693,FBgn0003060,FBgn0047199,FBgn0036929,FBgn0260794,FBg…	-|-|-|-|-|-|-|-|-|-|-|-|-|-|-|-|-|-|-|-|-|-|-|-|-|-|-|-|-|-|-|-|-|-|-|-|-|-|-|-|-|-|-|-|-|-|-|-|-|-|-|-|-|-|-|-|-|-|
GO:0006541	glutamine metabolic process	biological_process	0.017912	1	3	605	10	10392	FBgn0263607,FBgn0263608,FBgn0261625	-|-|-|
GO:0003951	NAD+ kinase activity	molecular_function	0.018815	1	2	605	4	10392	FBgn0033853,FBgn0053156	-|-|
GO:0006741	NADP biosynthetic process	biological_process	0.018815	1	2	605	4	10392	FBgn0053156,FBgn0033853	-|-|
GO:0001101	response to acid	biological_process	0.01911	1	2	605	4	10392	FBgn0036932,FBgn0030703	-|-|
GO:0071229	cellular response to acid	biological_process	0.01911	1	2	605	4	10392	FBgn0036932,FBgn0030703	-|-|
GO:0030695	GTPase regulator activity	molecular_function	0.019127	1	14	605	126	10392	FBgn0038653,FBgn0003392,FBgn0261570,FBgn0035916,FBgn0034158,FBgn0034194,FBgn0086686,FBgn0036921,FBgn0023172,FBgn0003969,FBgn0025836,FBgn0050456,FBgn0266521,FBgn0031762	-|-|-|-|-|-|-|-|-|-|-|-|-|-|
GO:0022412	cellular process involved in reproduction in multicellular organism	biological_process	0.019625	1	4	605	18	10392	FBgn0265623,FBgn0036591,FBgn0042201,FBgn0263258	-|-|-|-|
GO:0051259	protein oligomerization	biological_process	0.020514	1	5	605	27	10392	FBgn0003380,FBgn0263606,FBgn0264493,FBgn0037244,FBgn0003060	-|-|-|-|-|
GO:0000270	peptidoglycan metabolic process	biological_process	0.021121	1	4	605	19	10392	FBgn0043576,FBgn0033327,FBgn0043575,FBgn0083228	-|-|-|-|
GO:0051188	cofactor biosynthetic process	biological_process	0.021546	1	17	605	171	10392	FBgn0033853,FBgn0053156,FBgn0263346,FBgn0000346,FBgn0030871,FBgn0036159,FBgn0266464,FBgn0028868,FBgn0263594,FBgn0028684,FBgn0264493,FBgn0033769,FBgn0029113,FBgn0000576,FBgn0030468,FBgn0032981,FBgn0262882	-|-|-|-|-|-|-|-|-|-|-|-|-|-|-|-|-|
GO:0004064	arylesterase activity	molecular_function	0.022266	1	2	605	4	10392	FBgn0030706,FBgn0000119	-|-|
GO:0008170	N-methyltransferase activity	molecular_function	0.022805	1	6	605	39	10392	FBgn0051244,FBgn0037250,FBgn0039627,FBgn0030486,FBgn0261697,FBgn0261683	-|-|-|-|-|-|
GO:0030234	enzyme regulator activity	molecular_function	0.022923	1	29	605	334	10392	FBgn0038653,FBgn0029770,FBgn0038654,FBgn0003392,FBgn0035916,FBgn0034158,FBgn0038243,FBgn0004629,FBgn0086686,FBgn0036612,FBgn0029761,FBgn0003969,FBgn0023172,FBgn0033791,FBgn0025836,FBgn0030881,FBgn0031762,FBgn0261570,FBgn0038251,FBgn0051313,FBgn0014877,FBgn0034194,FBgn0036921,FBgn0003326,FBgn0261567,FBgn0039120,FBgn0050456,FBgn0266521,FBgn0026721	-|-|-|-|-|-|-|-|-|-|-|-|-|-|-|-|-|-|-|-|-|-|-|-|-|-|-|-|-|
GO:0006779	porphyrin-containing compound biosynthetic process	biological_process	0.022956	1	12	605	108	10392	FBgn0036159,FBgn0264493,FBgn0033769,FBgn0028684,FBgn0030468,FBgn0029113,FBgn0028868,FBgn0266464,FBgn0000576,FBgn0030871,FBgn0000346,FBgn0263346	-|-|-|-|-|-|-|-|-|-|-|-|
GO:0006261	DNA-dependent DNA replication	biological_process	0.022978	1	9	605	71	10392	FBgn0024555,FBgn0266375,FBgn0000576,FBgn0041605,FBgn0030904,FBgn0038242,FBgn0005596,FBgn0004512,FBgn0264907	-|-|-|-|-|-|-|-|-|
GO:0016043	cellular component organization	biological_process	0.023089	1	51	605	652	10392	FBgn0036929,FBgn0260794,FBgn0047199,FBgn0029761,FBgn0031781,FBgn0051702,FBgn0038659,FBgn0051909,FBgn0036593,FBgn0010315,FBgn0051703,FBgn0264493,FBgn0260442,FBgn0038248,FBgn0266521,FBgn0038652,FBgn0261574,FBgn0034168,FBgn0000611,FBgn0029664,FBgn0039617,FBgn0000308,FBgn0038252,FBgn0030869,FBgn0036576,FBgn0001170,FBgn0266084,FBgn0003882,FBgn0011743,FBgn0030877,FBgn0036612,FBgn0052791,FBgn0266429,FBg…	-|-|-|-|-|-|-|-|-|-|-|-|-|-|-|-|-|-|-|-|-|-|-|-|-|-|-|-|-|-|-|-|-|-|-|-|-|-|-|-|-|-|-|-|-|-|-|-|-|-|-|
GO:0005261	cation channel activity	molecular_function	0.023118	1	12	605	106	10392	FBgn0053061,FBgn0011286,FBgn0027581,FBgn0022981,FBgn0035845,FBgn0039424,FBgn0266489,FBgn0030897,FBgn0052792,FBgn0029672,FBgn0029761,FBgn0263346	-|-|-|-|-|-|-|-|-|-|-|-|
GO:0006778	porphyrin-containing compound metabolic process	biological_process	0.02336	1	13	605	121	10392	FBgn0030468,FBgn0000576,FBgn0266464,FBgn0028868,FBgn0029113,FBgn0036159,FBgn0264493,FBgn0033769,FBgn0028684,FBgn0030466,FBgn0030871,FBgn0000346,FBgn0263346	-|-|-|-|-|-|-|-|-|-|-|-|-|
GO:0006873	cellular ion homeostasis	biological_process	0.025669	1	5	605	29	10392	FBgn0027581,FBgn0011286,FBgn0036576,FBgn0266489,FBgn0035845	-|-|-|-|-|
GO:0006875	cellular metal ion homeostasis	biological_process	0.025669	1	5	605	29	10392	FBgn0036576,FBgn0266489,FBgn0035845,FBgn0027581,FBgn0011286	-|-|-|-|-|
GO:0030003	cellular cation homeostasis	biological_process	0.025669	1	5	605	29	10392	FBgn0027581,FBgn0011286,FBgn0036576,FBgn0266489,FBgn0035845	-|-|-|-|-|
GO:0005085	guanyl-nucleotide exchange factor activity	molecular_function	0.026038	1	7	605	48	10392	FBgn0034194,FBgn0050456,FBgn0034158,FBgn0031762,FBgn0003969,FBgn0023172,FBgn0025836	-|-|-|-|-|-|-|
GO:0015074	DNA integration	biological_process	0.027153	1	4	605	20	10392	Novel000042,Novel000079,Novel000065,Novel000078	-|-|-|-|
GO:0005262	calcium channel activity	molecular_function	0.028698	1	4	605	20	10392	FBgn0027581,FBgn0011286,FBgn0266489,FBgn0035845	-|-|-|-|
GO:0004860	protein kinase inhibitor activity	molecular_function	0.028899	1	3	605	12	10392	FBgn0030881,FBgn0038251,FBgn0029761	-|-|-|
GO:0019210	kinase inhibitor activity	molecular_function	0.028899	1	3	605	12	10392	FBgn0030881,FBgn0029761,FBgn0038251	-|-|-|
GO:0055082	cellular chemical homeostasis	biological_process	0.029301	1	5	605	30	10392	FBgn0036576,FBgn0266489,FBgn0035845,FBgn0027581,FBgn0011286	-|-|-|-|-|
GO:0019359	nicotinamide nucleotide biosynthetic process	biological_process	0.029756	1	2	605	5	10392	FBgn0033853,FBgn0053156	-|-|
GO:0019363	pyridine nucleotide biosynthetic process	biological_process	0.029756	1	2	605	5	10392	FBgn0033853,FBgn0053156	-|-|
GO:0060589	nucleoside-triphosphatase regulator activity	molecular_function	0.030622	1	15	605	147	10392	FBgn0035916,FBgn0003392,FBgn0261570,FBgn0038653,FBgn0086686,FBgn0036921,FBgn0034194,FBgn0034158,FBgn0014877,FBgn0025836,FBgn0023172,FBgn0003969,FBgn0031762,FBgn0266521,FBgn0050456	-|-|-|-|-|-|-|-|-|-|-|-|-|-|-|
GO:0006479	protein methylation	biological_process	0.031042	1	6	605	42	10392	FBgn0030486,FBgn0038189,FBgn0038188,FBgn0051244,FBgn0037250,FBgn0035914	-|-|-|-|-|-|
GO:0008213	protein alkylation	biological_process	0.031042	1	6	605	42	10392	FBgn0035914,FBgn0038189,FBgn0030486,FBgn0051244,FBgn0037250,FBgn0038188	-|-|-|-|-|-|
GO:0051186	cofactor metabolic process	biological_process	0.032291	1	19	605	207	10392	FBgn0036159,FBgn0266464,FBgn0028868,FBgn0263782,FBgn0000346,FBgn0053156,FBgn0263346,FBgn0033853,FBgn0030871,FBgn0028684,FBgn0033769,FBgn0264493,FBgn0000576,FBgn0029113,FBgn0262882,FBgn0032981,FBgn0030468,FBgn0263594,FBgn0030466	-|-|-|-|-|-|-|-|-|-|-|-|-|-|-|-|-|-|-|
GO:0055065	metal ion homeostasis	biological_process	0.03303	1	5	605	31	10392	FBgn0035845,FBgn0036576,FBgn0266489,FBgn0011286,FBgn0027581	-|-|-|-|-|
GO:0006464	cellular protein modification process	biological_process	0.033277	1	44	605	562	10392	FBgn0030701,FBgn0039120,FBgn0038189,FBgn0030486,FBgn0037251,FBgn0035853,FBgn0051244,FBgn0038188,FBgn0004784,FBgn0030864,FBgn0003091,FBgn0029672,FBgn0026619,FBgn0005596,FBgn0029667,FBgn0266429,FBgn0263606,FBgn0039111,FBgn0039623,FBgn0035854,FBgn0031765,FBgn0011286,FBgn0259738,FBgn0025742,FBgn0036417,FBgn0038167,FBgn0259683,FBgn0037250,FBgn0034159,FBgn0035914,FBgn0003169,FBgn0051702,FBgn0033791,FBg…	-|-|-|-|-|-|-|-|-|-|-|-|-|-|-|-|-|-|-|-|-|-|-|-|-|-|-|-|-|-|-|-|-|-|-|-|-|-|-|-|-|-|-|-|
GO:0036211	protein modification process	biological_process	0.033277	1	44	605	562	10392	FBgn0005596,FBgn0039623,FBgn0039111,FBgn0035854,FBgn0266429,FBgn0029667,FBgn0263606,FBgn0031765,FBgn0259738,FBgn0011286,FBgn0030864,FBgn0003091,FBgn0026619,FBgn0029672,FBgn0004784,FBgn0037251,FBgn0038189,FBgn0030486,FBgn0030701,FBgn0039120,FBgn0038188,FBgn0051244,FBgn0035853,FBgn0031784,FBgn0051703,FBgn0033773,FBgn0052944,FBgn0029113,FBgn0003256,FBgn0033791,FBgn0051702,FBgn0029761,FBgn0001085,FBg…	-|-|-|-|-|-|-|-|-|-|-|-|-|-|-|-|-|-|-|-|-|-|-|-|-|-|-|-|-|-|-|-|-|-|-|-|-|-|-|-|-|-|-|-|
GO:0008745	N-acetylmuramoyl-L-alanine amidase activity	molecular_function	0.034742	1	3	605	13	10392	FBgn0043575,FBgn0033327,FBgn0043576	-|-|-|
GO:0030031	cell projection assembly	biological_process	0.034767	1	5	605	31	10392	FBgn0029664,FBgn0000611,FBgn0003882,FBgn0038659,FBgn0263782	-|-|-|-|-|
GO:0051056	regulation of small GTPase mediated signal transduction	biological_process	0.035399	1	11	605	98	10392	FBgn0086686,FBgn0034194,FBgn0035916,FBgn0003392,FBgn0261570,FBgn0038653,FBgn0266521,FBgn0050456,FBgn0025836,FBgn0003969,FBgn0023172	-|-|-|-|-|-|-|-|-|-|-|
GO:0008121	ubiquinol-cytochrome-c reductase activity	molecular_function	0.036335	1	4	605	22	10392	FBgn0038246,FBgn0264493,FBgn0261566,FBgn0264903	-|-|-|-|
GO:0016681	oxidoreductase activity, acting on diphenols and related substances as donors, cytochrome as acceptor	molecular_function	0.036335	1	4	605	22	10392	FBgn0261566,FBgn0264903,FBgn0038246,FBgn0264493	-|-|-|-|
GO:0007186	G-protein coupled receptor signaling pathway	biological_process	0.037387	1	21	605	231	10392	FBgn0001085,FBgn0004512,FBgn0030466,FBgn0035866,FBgn0038244,FBgn0036934,FBgn0038653,FBgn0087012,FBgn0266429,FBgn0011509,FBgn0034168,FBgn0033853,FBgn0003248,FBgn0020930,FBgn0029768,FBgn0031770,FBgn0261571,FBgn0039419,FBgn0263512,FBgn0037408,FBgn0053639	-|-|-|-|-|-|-|-|-|-|-|-|-|-|-|-|-|-|-|-|-|
GO:0019904	protein domain specific binding	molecular_function	0.037924	1	3	605	13	10392	FBgn0029664,FBgn0000611,FBgn0038659	-|-|-|
GO:0043412	macromolecule modification	biological_process	0.038991	1	50	605	659	10392	FBgn0029113,FBgn0052944,FBgn0036593,FBgn0003256,FBgn0031784,FBgn0033773,FBgn0051703,FBgn0003093,FBgn0259168,FBgn0033791,FBgn0051702,FBgn0001085,FBgn0039627,FBgn0029761,FBgn0035914,FBgn0003169,FBgn0259683,FBgn0037250,FBgn0034159,FBgn0036417,FBgn0038167,FBgn0025742,FBgn0031765,FBgn0262508,FBgn0259738,FBgn0011286,FBgn0025808,FBgn0005596,FBgn0029667,FBgn0266429,FBgn0263606,FBgn0039623,FBgn0039111,FBg…	-|-|-|-|-|-|-|-|-|-|-|-|-|-|-|-|-|-|-|-|-|-|-|-|-|-|-|-|-|-|-|-|-|-|-|-|-|-|-|-|-|-|-|-|-|-|-|-|-|-|
GO:0015085	calcium ion transmembrane transporter activity	molecular_function	0.039938	1	4	605	22	10392	FBgn0035845,FBgn0266489,FBgn0011286,FBgn0027581	-|-|-|-|
GO:0017137	Rab GTPase binding	molecular_function	0.040159	1	4	605	22	10392	FBgn0004784,FBgn0003091,FBgn0003093,FBgn0023172	-|-|-|-|
GO:0006487	protein N-linked glycosylation	biological_process	0.041772	1	2	605	6	10392	FBgn0036417,FBgn0005596	-|-|
GO:0050801	ion homeostasis	biological_process	0.041827	1	5	605	33	10392	FBgn0011286,FBgn0027581,FBgn0035845,FBgn0266489,FBgn0036576	-|-|-|-|-|
GO:0055080	cation homeostasis	biological_process	0.041827	1	5	605	33	10392	FBgn0266489,FBgn0036576,FBgn0035845,FBgn0027581,FBgn0011286	-|-|-|-|-|
GO:0009378	four-way junction helicase activity	molecular_function	0.042119	1	6	605	45	10392	FBgn0000346,FBgn0028684,FBgn0030871,FBgn0028868,FBgn0266464,FBgn0025808	-|-|-|-|-|-|
GO:0008641	small protein activating enzyme activity	molecular_function	0.042557	1	2	605	6	10392	FBgn0029113,FBgn0030701	-|-|
GO:0072525	pyridine-containing compound biosynthetic process	biological_process	0.042565	1	2	605	6	10392	FBgn0033853,FBgn0053156	-|-|
GO:0000990	core RNA polymerase binding transcription factor activity	molecular_function	0.043926	1	4	605	23	10392	FBgn0024555,FBgn0266375,FBgn0033855,FBgn0085407	-|-|-|-|
GO:0000996	core DNA-dependent RNA polymerase binding promoter specificity activity	molecular_function	0.043926	1	4	605	23	10392	FBgn0266375,FBgn0024555,FBgn0033855,FBgn0085407	-|-|-|-|
GO:0016987	sigma factor activity	molecular_function	0.043926	1	4	605	23	10392	FBgn0085407,FBgn0033855,FBgn0266375,FBgn0024555	-|-|-|-|
GO:0006493	protein O-linked glycosylation	biological_process	0.04414	1	2	605	6	10392	FBgn0259738,FBgn0039120	-|-|
GO:0050896	response to stimulus	biological_process	0.045479	1	102	605	1470	10392	FBgn0030868,FBgn0037418,FBgn0004852,FBgn0000611,FBgn0051337,FBgn0030703,FBgn0031770,FBgn0034197,FBgn0036929,FBgn0030466,FBgn0041780,FBgn0036934,FBgn0038244,FBgn0003969,FBgn0025832,FBgn0025574,FBgn0259148,FBgn0051909,FBgn0013303,FBgn0036593,FBgn0015793,FBgn0038237,FBgn0087012,FBgn0026417,FBgn0003392,FBgn0050456,FBgn0029768,FBgn0010453,FBgn0086901,FBgn0263512,FBgn0035844,FBgn0031777,FBgn0266464,FBg…	-|-|-|-|-|-|-|-|-|-|-|-|-|-|-|-|-|-|-|-|-|-|-|-|-|-|-|-|-|-|-|-|-|-|-|-|-|-|-|-|-|-|-|-|-|-|-|-|-|-|-|-|-|-|-|-|-|-|-|-|-|-|-|-|-|-|-|-|-|-|-|-|-|-|-|-|-|-|-|-|-|-|-|-|-|-|-|-|-|-|-|-|-|-|-|-|-|-|-|-|-|-|
GO:0023052	signaling	biological_process	0.047162	1	70	605	963	10392	FBgn0035916,FBgn0083228,FBgn0038653,FBgn0053180,FBgn0000463,FBgn0003091,FBgn0035866,FBgn0024556,FBgn0038693,FBgn0036154,FBgn0037408,FBgn0033853,FBgn0000346,FBgn0036932,FBgn0020930,FBgn0003248,FBgn0086686,FBgn0011509,FBgn0034158,FBgn0038659,FBgn0025836,FBgn0035849,FBgn0001085,FBgn0023172,FBgn0036926,FBgn0031762,FBgn0003093,FBgn0039419,FBgn0030869,FBgn0261571,FBgn0053639,FBgn0033845,FBgn0034194,FBg…	-|-|-|-|-|-|-|-|-|-|-|-|-|-|-|-|-|-|-|-|-|-|-|-|-|-|-|-|-|-|-|-|-|-|-|-|-|-|-|-|-|-|-|-|-|-|-|-|-|-|-|-|-|-|-|-|-|-|-|-|-|-|-|-|-|-|-|-|-|-|
GO:0044700	single organism signaling	biological_process	0.047162	1	70	605	963	10392	FBgn0034158,FBgn0011509,FBgn0086686,FBgn0036926,FBgn0001085,FBgn0023172,FBgn0025836,FBgn0035849,FBgn0038659,FBgn0003093,FBgn0031762,FBgn0261571,FBgn0030869,FBgn0039419,FBgn0033845,FBgn0034194,FBgn0053639,FBgn0029664,FBgn0034168,FBgn0030897,FBgn0266521,FBgn0037236,FBgn0083228,FBgn0038653,FBgn0035916,FBgn0053180,FBgn0000463,FBgn0024556,FBgn0035866,FBgn0003091,FBgn0038693,FBgn0036154,FBgn0037408,FBg…	-|-|-|-|-|-|-|-|-|-|-|-|-|-|-|-|-|-|-|-|-|-|-|-|-|-|-|-|-|-|-|-|-|-|-|-|-|-|-|-|-|-|-|-|-|-|-|-|-|-|-|-|-|-|-|-|-|-|-|-|-|-|-|-|-|-|-|-|-|-|
GO:0019953	sexual reproduction	biological_process	0.047326	1	6	605	44	10392	FBgn0005624,FBgn0263219,FBgn0036591,FBgn0265623,FBgn0042201,FBgn0263258	-|-|-|-|-|-|
GO:0032040	small-subunit processome	cellular_component	0.047423	1	7	605	57	10392	FBgn0266375,FBgn0024555,FBgn0264907,FBgn0005624,FBgn0005596,FBgn0030892,FBgn0030864	-|-|-|-|-|-|-|
GO:0007154	cell communication	biological_process	0.047463	1	71	605	979	10392	FBgn0030893,FBgn0261570,FBgn0263512,FBgn0004784,FBgn0086901,FBgn0010453,FBgn0050456,FBgn0029768,FBgn0266429,FBgn0003016,FBgn0013809,FBgn0262519,FBgn0035872,FBgn0037263,FBgn0004512,FBgn0031770,FBgn0000611,FBgn0004852,FBgn0087012,FBgn0038237,FBgn0003392,FBgn0051909,FBgn0259148,FBgn0015793,FBgn0013303,FBgn0036593,FBgn0003969,FBgn0025574,FBgn0036929,FBgn0038244,FBgn0036934,FBgn0041780,FBgn0030466,FBg…	-|-|-|-|-|-|-|-|-|-|-|-|-|-|-|-|-|-|-|-|-|-|-|-|-|-|-|-|-|-|-|-|-|-|-|-|-|-|-|-|-|-|-|-|-|-|-|-|-|-|-|-|-|-|-|-|-|-|-|-|-|-|-|-|-|-|-|-|-|-|-|
GO:0003743	translation initiation factor activity	molecular_function	0.049787	1	6	605	46	10392	FBgn0041588,FBgn0265089,FBgn0262607,FBgn0039622,FBgn0261262,FBgn0030719	-|-|-|-|-|-|
GO:0008757	S-adenosylmethionine-dependent methyltransferase activity	molecular_function	0.050024	1	9	605	83	10392	FBgn0035914,FBgn0037250,FBgn0261683,FBgn0261697,FBgn0038191,FBgn0038189,FBgn0030486,FBgn0051244,FBgn0039627	-|-|-|-|-|-|-|-|-|
GO:0051606	detection of stimulus	biological_process	0.051258	1	3	605	15	10392	FBgn0035870,FBgn0030482,FBgn0023172	-|-|-|
GO:0008171	O-methyltransferase activity	molecular_function	0.052963	1	5	605	36	10392	FBgn0038189,FBgn0039627,FBgn0035914,FBgn0261683,FBgn0261697	-|-|-|-|-|
GO:0033043	regulation of organelle organization	biological_process	0.053575	1	5	605	35	10392	FBgn0003882,FBgn0035845,FBgn0031781,FBgn0266521,FBgn0263782	-|-|-|-|-|
GO:0008276	protein methyltransferase activity	molecular_function	0.055061	1	7	605	60	10392	FBgn0038189,FBgn0030486,FBgn0051244,FBgn0039627,FBgn0038188,FBgn0037250,FBgn0035914	-|-|-|-|-|-|-|
GO:0003864	3-methyl-2-oxobutanoate hydroxymethyltransferase activity	molecular_function	0.05573	1	1	605	1	10392	FBgn0262882	-|
GO:0004489	methylenetetrahydrofolate reductase (NADPH) activity	molecular_function	0.05618	1	1	605	1	10392	FBgn0036157	-|
GO:0008612	peptidyl-lysine modification to hypusine	biological_process	0.05621	1	1	605	1	10392	FBgn0035854	-|
GO:0046516	hypusine metabolic process	biological_process	0.05621	1	1	605	1	10392	FBgn0035854	-|
GO:0005742	mitochondrial outer membrane translocase complex	cellular_component	0.056245	1	2	605	7	10392	FBgn0036774,FBgn0036928	-|-|
GO:0035257	nuclear hormone receptor binding	molecular_function	0.056405	1	1	605	1	10392	FBgn0038166	-|
GO:0051427	hormone receptor binding	molecular_function	0.056405	1	1	605	1	10392	FBgn0038166	-|
GO:0048040	UDP-glucuronate decarboxylase activity	molecular_function	0.056954	1	1	605	1	10392	FBgn0035848	-|
GO:0051128	regulation of cellular component organization	biological_process	0.057176	1	6	605	47	10392	FBgn0004456,FBgn0003882,FBgn0035845,FBgn0031781,FBgn0263782,FBgn0266521	-|-|-|-|-|-|
GO:0043772	acyl-phosphate glycerol-3-phosphate acyltransferase activity	molecular_function	0.057333	1	1	605	1	10392	FBgn0002901	-|
GO:0016571	histone methylation	biological_process	0.058567	1	2	605	7	10392	FBgn0030486,FBgn0051244	-|-|
GO:0034968	histone lysine methylation	biological_process	0.058567	1	2	605	7	10392	FBgn0030486,FBgn0051244	-|-|
GO:0051205	protein insertion into membrane	biological_process	0.058723	1	2	605	7	10392	FBgn0034168,FBgn0038652	-|-|
GO:0051668	localization within membrane	biological_process	0.058723	1	2	605	7	10392	FBgn0034168,FBgn0038652	-|-|
GO:0000030	mannosyltransferase activity	molecular_function	0.058863	1	2	605	7	10392	FBgn0259738,FBgn0039120	-|-|
GO:0030291	protein serine/threonine kinase inhibitor activity	molecular_function	0.059088	1	2	605	7	10392	FBgn0038251,FBgn0029761	-|-|
GO:0009987	cellular process	biological_process	0.059345	1	354	605	5717	10392	FBgn0031781,FBgn0029666,FBgn0025832,FBgn0034156,FBgn0025574,FBgn0259168,FBgn0030466,FBgn0038244,FBgn0026417,FBgn0010198,FBgn0003392,FBgn0000576,FBgn0026749,FBgn0000617,FBgn0042201,FBgn0036417,FBgn0031770,FBgn0263219,FBgn0038246,FBgn0039620,FBgn0016754,FBgn0040743,FBgn0034182,FBgn0037239,FBgn0030872,FBgn0039631,FBgn0266429,FBgn0037231,FBgn0262882,FBgn0013809,FBgn0025808,FBgn0030877,FBgn0039637,FBg…	-|-|-|-|-|-|-|-|-|-|-|-|-|-|-|-|-|-|-|-|-|-|-|-|-|-|-|-|-|-|-|-|-|-|-|-|-|-|-|-|-|-|-|-|-|-|-|-|-|-|-|-|-|-|-|-|-|-|-|-|-|-|-|-|-|-|-|-|-|-|-|-|-|-|-|-|-|-|-|-|-|-|-|-|-|-|-|-|-|-|-|-|-|-|-|-|-|-|-|-|-|-|-|-|-|-|-|-|-|-|-|-|-|-|-|-|-|-|-|-|-|-|-|-|-|-|-|-
GO:0030212	hyaluronan metabolic process	biological_process	0.059381	1	1	605	1	10392	FBgn0036612	-|
GO:0006026	aminoglycan catabolic process	biological_process	0.05942	1	4	605	26	10392	FBgn0043576,FBgn0083228,FBgn0033327,FBgn0043575	-|-|-|-|
GO:0046870	cadmium ion binding	molecular_function	0.06	1	1	605	1	10392	FBgn0015778	-|
GO:0015969	guanosine tetraphosphate metabolic process	biological_process	0.060043	1	1	605	1	10392	FBgn0036781	-|
GO:0034035	purine ribonucleoside bisphosphate metabolic process	biological_process	0.060043	1	1	605	1	10392	FBgn0036781	-|
GO:0043414	macromolecule methylation	biological_process	0.06013	1	7	605	61	10392	FBgn0038189,FBgn0030486,FBgn0037250,FBgn0051244,FBgn0038188,FBgn0035914,FBgn0031777	-|-|-|-|-|-|-|
GO:0015562	efflux transmembrane transporter activity	molecular_function	0.060333	1	1	605	1	10392	FBgn0032988	-|
GO:0034639	L-amino acid efflux transmembrane transporter activity	molecular_function	0.060333	1	1	605	1	10392	FBgn0032988	-|
GO:0004359	glutaminase activity	molecular_function	0.060569	1	1	605	1	10392	FBgn0261625	-|
GO:0009581	detection of external stimulus	biological_process	0.061788	1	1	605	1	10392	FBgn0023172	-|
GO:0009582	detection of abiotic stimulus	biological_process	0.061788	1	1	605	1	10392	FBgn0023172	-|
GO:0009583	detection of light stimulus	biological_process	0.061788	1	1	605	1	10392	FBgn0023172	-|
GO:0016037	light absorption	biological_process	0.061788	1	1	605	1	10392	FBgn0023172	-|
GO:0031404	chloride ion binding	molecular_function	0.061788	1	1	605	1	10392	FBgn0023172	-|
GO:0004420	hydroxymethylglutaryl-CoA reductase (NADPH) activity	molecular_function	0.061808	1	1	605	1	10392	FBgn0263782	-|
GO:0016679	oxidoreductase activity, acting on diphenols and related substances as donors	molecular_function	0.0626	1	4	605	26	10392	FBgn0264493,FBgn0038246,FBgn0264903,FBgn0261566	-|-|-|-|
GO:0016278	lysine N-methyltransferase activity	molecular_function	0.06302	1	3	605	16	10392	FBgn0030486,FBgn0051244,FBgn0039627	-|-|-|
GO:0016279	protein-lysine N-methyltransferase activity	molecular_function	0.06302	1	3	605	16	10392	FBgn0030486,FBgn0051244,FBgn0039627	-|-|-|
GO:0018024	histone-lysine N-methyltransferase activity	molecular_function	0.06302	1	3	605	16	10392	FBgn0030486,FBgn0051244,FBgn0039627	-|-|-|
GO:0042054	histone methyltransferase activity	molecular_function	0.06302	1	3	605	16	10392	FBgn0039627,FBgn0051244,FBgn0030486	-|-|-|
GO:0042775	mitochondrial ATP synthesis coupled electron transport	biological_process	0.063385	1	3	605	16	10392	FBgn0011227,FBgn0263346,FBgn0259683	-|-|-|
GO:0003678	DNA helicase activity	molecular_function	0.064153	1	8	605	74	10392	FBgn0025808,FBgn0266464,FBgn0028868,FBgn0030904,FBgn0028684,FBgn0030871,FBgn0039617,FBgn0000346	-|-|-|-|-|-|-|-|
GO:0006952	defense response	biological_process	0.064374	1	14	605	152	10392	FBgn0037418,FBgn0030868,FBgn0041780,FBgn0033784,FBgn0037410,FBgn0262508,FBgn0051337,FBgn0034186,FBgn0261113,FBgn0035844,FBgn0034197,FBgn0260442,FBgn0037249,FBgn0039636	-|-|-|-|-|-|-|-|-|-|-|-|-|-|
GO:0006566	threonine metabolic process	biological_process	0.064399	1	1	605	1	10392	FBgn0004456	-|
GO:0009088	threonine biosynthetic process	biological_process	0.064399	1	1	605	1	10392	FBgn0004456	-|
GO:0031555	transcriptional attenuation	biological_process	0.064399	1	1	605	1	10392	FBgn0004456	-|
GO:0031556	transcriptional attenuation by ribosome	biological_process	0.064399	1	1	605	1	10392	FBgn0004456	-|
GO:0030030	cell projection organization	biological_process	0.065069	1	5	605	37	10392	FBgn0263782,FBgn0038659,FBgn0000611,FBgn0029664,FBgn0003882	-|-|-|-|-|
GO:0016286	small conductance calcium-activated potassium channel activity	molecular_function	0.066386	1	1	605	1	10392	FBgn0029761	-|
GO:0004386	helicase activity	molecular_function	0.066614	1	18	605	210	10392	FBgn0025808,FBgn0262519,FBgn0013809,FBgn0039117,FBgn0028684,FBgn0038653,FBgn0004512,FBgn0040290,FBgn0266464,FBgn0028868,FBgn0037232,FBgn0086613,FBgn0030904,FBgn0002899,FBgn0001942,FBgn0039617,FBgn0000346,FBgn0030871	-|-|-|-|-|-|-|-|-|-|-|-|-|-|-|-|-|-|
GO:0009653	anatomical structure morphogenesis	biological_process	0.066644	1	8	605	74	10392	FBgn0030877,FBgn0265623,FBgn0036591,FBgn0042201,FBgn0263258,FBgn0039115,FBgn0003882,FBgn0011743	-|-|-|-|-|-|-|-|
GO:0006413	translational initiation	biological_process	0.06698	1	5	605	38	10392	FBgn0030719,FBgn0041588,FBgn0265089,FBgn0039622,FBgn0262607	-|-|-|-|-|
GO:0004222	metalloendopeptidase activity	molecular_function	0.067229	1	10	605	99	10392	FBgn0029769,FBgn0039640,FBgn0036153,FBgn0263983,FBgn0265140,FBgn0037230,FBgn0036416,FBgn0264493,FBgn0027570,FBgn0259110	-|-|-|-|-|-|-|-|-|-|
GO:0030684	preribosome	cellular_component	0.068793	1	7	605	62	10392	FBgn0024555,FBgn0266375,FBgn0030864,FBgn0030892,FBgn0005596,FBgn0005624,FBgn0264907	-|-|-|-|-|-|-|
GO:0003723	RNA binding	molecular_function	0.069402	1	33	605	430	10392	FBgn0263987,FBgn0038251,FBgn0041605,FBgn0028868,FBgn0266464,FBgn0263782,FBgn0010488,Novel000065,FBgn0261262,FBgn0000346,FBgn0085383,FBgn0036919,FBgn0086784,FBgn0250833,FBgn0085391,FBgn0260634,FBgn0052791,FBgn0013809,FBgn0261113,FBgn0039622,FBgn0004512,FBgn0036421,FBgn0265089,FBgn0028737,FBgn0038191,FBgn0028684,FBgn0014870,FBgn0030719,FBgn0036593,FBgn0041588,FBgn0030720,FBgn0262607,FBgn0029666	-|-|-|-|-|-|-|-|-|-|-|-|-|-|-|-|-|-|-|-|-|-|-|-|-|-|-|-|-|-|-|-|-|
GO:0016811	hydrolase activity, acting on carbon-nitrogen (but not peptide) bonds, in linear amides	molecular_function	0.07001	1	4	605	27	10392	FBgn0033327,FBgn0043575,FBgn0043576,FBgn0261625	-|-|-|-|
GO:0007166	cell surface receptor signaling pathway	biological_process	0.070708	1	24	605	291	10392	FBgn0011509,FBgn0266429,FBgn0087012,FBgn0038653,FBgn0036934,FBgn0038244,FBgn0035866,FBgn0030466,FBgn0004512,FBgn0025574,FBgn0000463,FBgn0001085,FBgn0053639,FBgn0037408,FBgn0263512,FBgn0039419,FBgn0031770,FBgn0261571,FBgn0029768,FBgn0020930,FBgn0003248,FBgn0033853,FBgn0010453,FBgn0034168	-|-|-|-|-|-|-|-|-|-|-|-|-|-|-|-|-|-|-|-|-|-|-|-|
GO:0051260	protein homooligomerization	biological_process	0.07087	1	3	605	16	10392	FBgn0003380,FBgn0037244,FBgn0264493	-|-|-|
GO:0016779	nucleotidyltransferase activity	molecular_function	0.070955	1	21	605	255	10392	FBgn0038252,Novel000065,FBgn0030893,FBgn0261570,FBgn0037279,FBgn0261683,FBgn0086784,FBgn0261697,FBgn0037275,FBgn0039110,FBgn0030871,FBgn0026749,FBgn0030707,FBgn0037249,FBgn0263606,FBgn0000121,FBgn0003091,FBgn0039631,FBgn0034182,FBgn0036775,FBgn0085407	-|-|-|-|-|-|-|-|-|-|-|-|-|-|-|-|-|-|-|-|-|
GO:0070085	glycosylation	biological_process	0.071598	1	9	605	89	10392	FBgn0036417,FBgn0026754,FBgn0039120,FBgn0259738,FBgn0031765,FBgn0031887,FBgn0039639,FBgn0259683,FBgn0005596	-|-|-|-|-|-|-|-|-|
GO:0006631	fatty acid metabolic process	biological_process	0.072043	1	7	605	63	10392	FBgn0031775,FBgn0034184,FBgn0033769,FBgn0001941,FBgn0039113,FBgn0030485,FBgn0039632	-|-|-|-|-|-|-|
GO:0034062	RNA polymerase activity	molecular_function	0.073675	1	13	605	142	10392	FBgn0026749,FBgn0263606,FBgn0000121,FBgn0261570,FBgn0030893,FBgn0261697,FBgn0034182,FBgn0039631,FBgn0003091,FBgn0261683,FBgn0036775,FBgn0085407,FBgn0037275	-|-|-|-|-|-|-|-|-|-|-|-|-|
GO:0000154	rRNA modification	biological_process	0.074167	1	4	605	28	10392	FBgn0031777,FBgn0037250,FBgn0039627,FBgn0038189	-|-|-|-|
GO:0016703	oxidoreductase activity, acting on single donors with incorporation of molecular oxygen, incorporation of one atom of oxygen (internal monooxygenases or internal mixed function oxidases)	molecular_function	0.0746	1	2	605	8	10392	FBgn0001170,FBgn0025836	-|-|
GO:0030176	integral to endoplasmic reticulum membrane	cellular_component	0.074824	1	3	605	17	10392	FBgn0034197,FBgn0039117,FBgn0266429	-|-|-|
GO:0006022	aminoglycan metabolic process	biological_process	0.075545	1	13	605	145	10392	FBgn0040950,FBgn0037236,Novel000079,FBgn0043576,FBgn0043575,FBgn0033327,FBgn0035845,FBgn0083228,FBgn0036612,FBgn0040687,Novel000078,FBgn0026077,FBgn0035844	-|-|-|-|-|-|-|-|-|-|-|-|-|
GO:0007267	cell-cell signaling	biological_process	0.075569	1	3	605	17	10392	FBgn0003016,FBgn0035872,FBgn0033845	-|-|-|
GO:0007165	signal transduction	biological_process	0.080366	1	67	605	947	10392	FBgn0083228,FBgn0038653,FBgn0035916,FBgn0053180,FBgn0000463,FBgn0024556,FBgn0035866,FBgn0003091,FBgn0038693,FBgn0037408,FBgn0036154,FBgn0036932,FBgn0000346,FBgn0033853,FBgn0003248,FBgn0020930,FBgn0034158,FBgn0011509,FBgn0086686,FBgn0036926,FBgn0023172,FBgn0001085,FBgn0035849,FBgn0025836,FBgn0038659,FBgn0003093,FBgn0031762,FBgn0261571,FBgn0030869,FBgn0039419,FBgn0034194,FBgn0053639,FBgn0029664,FBg…	-|-|-|-|-|-|-|-|-|-|-|-|-|-|-|-|-|-|-|-|-|-|-|-|-|-|-|-|-|-|-|-|-|-|-|-|-|-|-|-|-|-|-|-|-|-|-|-|-|-|-|-|-|-|-|-|-|-|-|-|-|-|-|-|-|-|-|
GO:0007275	multicellular organismal development	biological_process	0.080733	1	11	605	116	10392	FBgn0000463,FBgn0003882,FBgn0010453,FBgn0264741,FBgn0000355,FBgn0000356,FBgn0039115,FBgn0038244,FBgn0000357,FBgn0000358,FBgn0030468	-|-|-|-|-|-|-|-|-|-|-|
GO:0044448	cell cortex part	cellular_component	0.082176	1	3	605	18	10392	FBgn0031886,FBgn0000611,FBgn0030719	-|-|-|
GO:0007266	Rho protein signal transduction	biological_process	0.083198	1	4	605	27	10392	FBgn0023172,FBgn0025836,FBgn0050456,FBgn0034194	-|-|-|-|
GO:0035023	regulation of Rho protein signal transduction	biological_process	0.083198	1	4	605	27	10392	FBgn0025836,FBgn0023172,FBgn0050456,FBgn0034194	-|-|-|-|
GO:0007016	cytoskeletal anchoring at plasma membrane	biological_process	0.083397	1	2	605	8	10392	FBgn0260442,FBgn0036612	-|-|
GO:0032259	methylation	biological_process	0.083796	1	8	605	79	10392	FBgn0030486,FBgn0038189,FBgn0051244,FBgn0038188,FBgn0035914,FBgn0030720,FBgn0031777,FBgn0037250	-|-|-|-|-|-|-|-|
GO:0008536	Ran GTPase binding	molecular_function	0.085608	1	3	605	18	10392	FBgn0087013,FBgn0034205,FBgn0053180	-|-|-|
GO:0019079	viral genome replication	biological_process	0.086483	1	5	605	41	10392	FBgn0000346,FBgn0000121,FBgn0028868,FBgn0266464,FBgn0001942	-|-|-|-|-|
GO:0016021	integral to membrane	cellular_component	0.086654	1	111	605	1663	10392	FBgn0001085,FBgn0039641,FBgn0260794,FBgn0264741,FBgn0035848,FBgn0036773,FBgn0011509,FBgn0038662,FBgn0034168,FBgn0263346,FBgn0033323,FBgn0051523,FBgn0038652,FBgn0040777,FBgn0039112,FBgn0030890,FBgn0039419,FBgn0014877,FBgn0085302,FBgn0035914,FBgn0053639,FBgn0000463,FBgn0014037,FBgn0017579,FBgn0024556,FBgn0035866,FBgn0038653,FBgn0266489,FBgn0036594,FBgn0261113,FBgn0032988,FBgn0036152,FBgn0260964,FBg…	-|-|-|-|-|-|-|-|-|-|-|-|-|-|-|-|-|-|-|-|-|-|-|-|-|-|-|-|-|-|-|-|-|-|-|-|-|-|-|-|-|-|-|-|-|-|-|-|-|-|-|-|-|-|-|-|-|-|-|-|-|-|-|-|-|-|-|-|-|-|-|-|-|-|-|-|-|-|-|-|-|-|-|-|-|-|-|-|-|-|-|-|-|-|-|-|-|-|-|-|-|-|-|-|-|-|-|-|-|-|-|
GO:0044267	cellular protein metabolic process	biological_process	0.08677	1	80	605	1180	10392	FBgn0031776,FBgn0026741,FBgn0035845,FBgn0036924,FBgn0004784,FBgn0030486,FBgn0039120,FBgn0035853,FBgn0035918,FBgn0038234,FBgn0037231,FBgn0005596,FBgn0036918,FBgn0050350,FBgn0039623,FBgn0039111,FBgn0266429,FBgn0029667,FBgn0263606,FBgn0031765,FBgn0259738,FBgn0011286,FBgn0030864,FBgn0030872,FBgn0039622,FBgn0040074,FBgn0029672,FBgn0032987,FBgn0087039,FBgn0265089,FBgn0261545,FBgn0033787,FBgn0050357,FBg…	-|-|-|-|-|-|-|-|-|-|-|-|-|-|-|-|-|-|-|-|-|-|-|-|-|-|-|-|-|-|-|-|-|-|-|-|-|-|-|-|-|-|-|-|-|-|-|-|-|-|-|-|-|-|-|-|-|-|-|-|-|-|-|-|-|-|-|-|-|-|-|-|-|-|-|-|-|-|-|-|
GO:0006457	protein folding	biological_process	0.090095	1	8	605	81	10392	FBgn0014877,FBgn0033787,FBgn0036415,FBgn0050350,FBgn0037231,FBgn0031776,FBgn0036918,FBgn0040074	-|-|-|-|-|-|-|-|
GO:0005088	Ras guanyl-nucleotide exchange factor activity	molecular_function	0.09191	1	4	605	28	10392	FBgn0050456,FBgn0034194,FBgn0025836,FBgn0023172	-|-|-|-|
GO:0005089	Rho guanyl-nucleotide exchange factor activity	molecular_function	0.09191	1	4	605	28	10392	FBgn0025836,FBgn0023172,FBgn0034194,FBgn0050456	-|-|-|-|
GO:0044425	membrane part	cellular_component	0.09255	1	131	605	1995	10392	FBgn0015793,FBgn0038237,FBgn0001941,FBgn0036934,FBgn0029761,FBgn0261545,Novel000095,FBgn0038252,FBgn0003326,FBgn0266449,FBgn0004852,FBgn0035870,FBgn0259738,FBgn0011286,FBgn0036585,FBgn0027581,FBgn0003380,FBgn0260634,FBgn0036608,FBgn0259111,FBgn0014869,FBgn0030895,FBgn0033326,FBgn0261507,FBgn0024189,FBgn0036928,FBgn0036924,FBgn0261673,FBgn0030479,FBgn0028671,FBgn0029768,FBgn0035918,FBgn0264907,FBg…	-|-|-|-|-|-|-|-|-|-|-|-|-|-|-|-|-|-|-|-|-|-|-|-|-|-|-|-|-|-|-|-|-|-|-|-|-|-|-|-|-|-|-|-|-|-|-|-|-|-|-|-|-|-|-|-|-|-|-|-|-|-|-|-|-|-|-|-|-|-|-|-|-|-|-|-|-|-|-|-|-|-|-|-|-|-|-|-|-|-|-|-|-|-|-|-|-|-|-|-|-|-|-|-|-|-|-|-|-|-|-|-|-|-|-|-|-|-|-|-|-|-|-|-|-|-|-|-
GO:0031167	rRNA methylation	biological_process	0.093271	1	3	605	19	10392	FBgn0031777,FBgn0038189,FBgn0037250	-|-|-|
GO:0000278	mitotic cell cycle	biological_process	0.09358	1	5	605	41	10392	FBgn0036576,FBgn0035845,FBgn0029667,FBgn0030874,FBgn0031886	-|-|-|-|-|
GO:0005643	nuclear pore	cellular_component	0.094969	1	5	605	42	10392	FBgn0039120,FBgn0031886,FBgn0261545,FBgn0035848,FBgn0003326	-|-|-|-|-|
GO:0046930	pore complex	cellular_component	0.094969	1	5	605	42	10392	FBgn0003326,FBgn0035848,FBgn0031886,FBgn0261545,FBgn0039120	-|-|-|-|-|
GO:0006606	protein import into nucleus	biological_process	0.095157	1	4	605	30	10392	FBgn0031886,FBgn0261545,FBgn0003326,FBgn0035848	-|-|-|-|
GO:0034504	protein localization to nucleus	biological_process	0.095157	1	4	605	30	10392	FBgn0261545,FBgn0031886,FBgn0035848,FBgn0003326	-|-|-|-|
GO:0044744	protein targeting to nucleus	biological_process	0.095157	1	4	605	30	10392	FBgn0261545,FBgn0031886,FBgn0003326,FBgn0035848	-|-|-|-|
GO:0051170	nuclear import	biological_process	0.095157	1	4	605	30	10392	FBgn0035848,FBgn0003326,FBgn0261545,FBgn0031886	-|-|-|-|
GO:0033014	tetrapyrrole biosynthetic process	biological_process	0.095171	1	12	605	135	10392	FBgn0028684,FBgn0036159,FBgn0264493,FBgn0033769,FBgn0029113,FBgn0266464,FBgn0000576,FBgn0028868,FBgn0030468,FBgn0000346,FBgn0263346,FBgn0030871	-|-|-|-|-|-|-|-|-|-|-|-|
GO:0016813	hydrolase activity, acting on carbon-nitrogen (but not peptide) bonds, in linear amidines	molecular_function	0.096517	1	2	605	9	10392	FBgn0259110,FBgn0030467	-|-|
GO:0006836	neurotransmitter transport	biological_process	0.097217	1	4	605	30	10392	FBgn0035872,FBgn0029663,FBgn0029762,FBgn0041605	-|-|-|-|
GO:0033013	tetrapyrrole metabolic process	biological_process	0.097424	1	13	605	150	10392	FBgn0030468,FBgn0029113,FBgn0000576,FBgn0266464,FBgn0028868,FBgn0264493,FBgn0033769,FBgn0036159,FBgn0028684,FBgn0030466,FBgn0030871,FBgn0263346,FBgn0000346	-|-|-|-|-|-|-|-|-|-|-|-|-|
GO:0048646	anatomical structure formation involved in morphogenesis	biological_process	0.098469	1	4	605	30	10392	FBgn0263258,FBgn0265623,FBgn0036591,FBgn0042201	-|-|-|-|
GO:0044702	single organism reproductive process	biological_process	0.099163	1	5	605	41	10392	FBgn0036591,FBgn0265623,FBgn0042201,FBgn0263258,FBgn0263219	-|-|-|-|-|
GO:0006486	protein glycosylation	biological_process	0.10028	1	6	605	55	10392	FBgn0031765,FBgn0259738,FBgn0036417,FBgn0005596,FBgn0259683,FBgn0039120	-|-|-|-|-|-|
GO:0009101	glycoprotein biosynthetic process	biological_process	0.10028	1	6	605	55	10392	FBgn0031765,FBgn0036417,FBgn0259738,FBgn0039120,FBgn0259683,FBgn0005596	-|-|-|-|-|-|
GO:0043413	macromolecule glycosylation	biological_process	0.10028	1	6	605	55	10392	FBgn0031765,FBgn0259738,FBgn0036417,FBgn0039120,FBgn0259683,FBgn0005596	-|-|-|-|-|-|
GO:0051641	cellular localization	biological_process	0.10044	1	34	605	463	10392	FBgn0038652,FBgn0000611,FBgn0034168,FBgn0039110,FBgn0014877,FBgn0261545,Novel000095,FBgn0003326,FBgn0264741,FBgn0036774,FBgn0003093,FBgn0035848,FBgn0023172,FBgn0038662,FBgn0030720,FBgn0024555,FBgn0260442,FBgn0031886,FBgn0087013,FBgn0036932,FBgn0035850,FBgn0036928,FBgn0034205,FBgn0004784,FBgn0036920,FBgn0036414,FBgn0008646,FBgn0003091,FBgn0025808,FBgn0053180,FBgn0036152,FBgn0036612,FBgn0035872,FBg…	-|-|-|-|-|-|-|-|-|-|-|-|-|-|-|-|-|-|-|-|-|-|-|-|-|-|-|-|-|-|-|-|-|-|
GO:0051716	cellular response to stimulus	biological_process	0.1006	1	80	605	1172	10392	FBgn0004512,FBgn0037263,FBgn0013809,FBgn0262519,FBgn0025808,FBgn0030474,FBgn0266429,FBgn0029768,FBgn0050456,FBgn0010453,FBgn0086901,FBgn0266464,FBgn0004784,FBgn0263512,FBgn0261570,FBgn0030893,FBgn0041780,FBgn0030466,FBgn0038244,FBgn0036934,FBgn0036929,FBgn0025832,FBgn0025574,FBgn0003969,FBgn0036593,FBgn0013303,FBgn0015793,FBgn0259148,FBgn0051909,FBgn0003392,FBgn0038237,FBgn0026417,FBgn0087012,FBg…	-|-|-|-|-|-|-|-|-|-|-|-|-|-|-|-|-|-|-|-|-|-|-|-|-|-|-|-|-|-|-|-|-|-|-|-|-|-|-|-|-|-|-|-|-|-|-|-|-|-|-|-|-|-|-|-|-|-|-|-|-|-|-|-|-|-|-|-|-|-|-|-|-|-|-|-|-|-|-|-|
GO:0005272	sodium channel activity	molecular_function	0.1044	1	5	605	43	10392	FBgn0022981,FBgn0030897,FBgn0052792,FBgn0029672,FBgn0039424	-|-|-|-|-|
GO:0031224	intrinsic to membrane	cellular_component	0.10444	1	111	605	1678	10392	FBgn0260794,FBgn0264741,FBgn0035848,FBgn0001085,FBgn0039641,FBgn0011509,FBgn0038662,FBgn0036773,FBgn0051523,FBgn0040777,FBgn0038652,FBgn0034168,FBgn0263346,FBgn0033323,FBgn0014877,FBgn0085302,FBgn0053639,FBgn0035914,FBgn0039112,FBgn0030890,FBgn0039419,FBgn0017579,FBgn0024556,FBgn0035866,FBgn0000463,FBgn0014037,FBgn0036594,FBgn0261113,FBgn0032988,FBgn0260964,FBgn0036152,FBgn0036612,FBgn0038653,FBg…	-|-|-|-|-|-|-|-|-|-|-|-|-|-|-|-|-|-|-|-|-|-|-|-|-|-|-|-|-|-|-|-|-|-|-|-|-|-|-|-|-|-|-|-|-|-|-|-|-|-|-|-|-|-|-|-|-|-|-|-|-|-|-|-|-|-|-|-|-|-|-|-|-|-|-|-|-|-|-|-|-|-|-|-|-|-|-|-|-|-|-|-|-|-|-|-|-|-|-|-|-|-|-|-|-|-|-|-|-|-|-|
GO:0009066	aspartate family amino acid metabolic process	biological_process	0.10482	1	3	605	20	10392	FBgn0004456,FBgn0033774,FBgn0036157	-|-|-|
GO:0072509	divalent inorganic cation transmembrane transporter activity	molecular_function	0.10532	1	7	605	69	10392	FBgn0266489,FBgn0035845,FBgn0015793,FBgn0027581,FBgn0035866,FBgn0011509,FBgn0011286	-|-|-|-|-|-|-|
GO:0008104	protein localization	biological_process	0.10561	1	33	605	449	10392	FBgn0023172,FBgn0001085,FBgn0035848,FBgn0003093,FBgn0036774,FBgn0264741,FBgn0260442,FBgn0030720,FBgn0034168,FBgn0038652,FBgn0034197,FBgn0034159,FBgn0003326,Novel000095,FBgn0261545,FBgn0014877,FBgn0003091,FBgn0008646,FBgn0036414,FBgn0039117,FBgn0037231,FBgn0053180,FBgn0036612,FBgn0036152,FBgn0025808,FBgn0035853,FBgn0087013,FBgn0031886,FBgn0036920,FBgn0004784,FBgn0034205,FBgn0036928,FBgn0035850	-|-|-|-|-|-|-|-|-|-|-|-|-|-|-|-|-|-|-|-|-|-|-|-|-|-|-|-|-|-|-|-|-|
GO:0046834	lipid phosphorylation	biological_process	0.10613	1	2	605	10	10392	FBgn0016672,FBgn0030465	-|-|
GO:0046854	phosphatidylinositol phosphorylation	biological_process	0.10613	1	2	605	10	10392	FBgn0030465,FBgn0016672	-|-|
GO:0008135	translation factor activity, nucleic acid binding	molecular_function	0.10642	1	7	605	69	10392	FBgn0265089,FBgn0262607,FBgn0039622,FBgn0041588,FBgn0028737,FBgn0261262,FBgn0030719	-|-|-|-|-|-|-|
GO:0005938	cell cortex	cellular_component	0.10678	1	3	605	20	10392	FBgn0000611,FBgn0030719,FBgn0031886	-|-|-|
GO:0009100	glycoprotein metabolic process	biological_process	0.10696	1	6	605	56	10392	FBgn0031765,FBgn0259738,FBgn0036417,FBgn0005596,FBgn0259683,FBgn0039120	-|-|-|-|-|-|
GO:0009617	response to bacterium	biological_process	0.10888	1	6	605	55	10392	FBgn0037249,FBgn0039636,FBgn0030868,FBgn0041780,FBgn0037410,FBgn0035844	-|-|-|-|-|-|
GO:0042742	defense response to bacterium	biological_process	0.10888	1	6	605	55	10392	FBgn0035844,FBgn0041780,FBgn0030868,FBgn0037410,FBgn0039636,FBgn0037249	-|-|-|-|-|-|
GO:0005666	DNA-directed RNA polymerase III complex	cellular_component	0.10912	1	1	605	2	10392	FBgn0036775	-|
GO:0070176	DRM complex	cellular_component	0.10913	1	1	605	2	10392	FBgn0033770	-|
GO:0001919	regulation of receptor recycling	biological_process	0.10967	1	1	605	2	10392	FBgn0036932	-|
GO:0005768	endosome	cellular_component	0.10967	1	1	605	2	10392	FBgn0036932	-|
GO:0005770	late endosome	cellular_component	0.10967	1	1	605	2	10392	FBgn0036932	-|
GO:0007040	lysosome organization	biological_process	0.10967	1	1	605	2	10392	FBgn0036932	-|
GO:0009967	positive regulation of signal transduction	biological_process	0.10967	1	1	605	2	10392	FBgn0036932	-|
GO:0010008	endosome membrane	cellular_component	0.10967	1	1	605	2	10392	FBgn0036932	-|
GO:0010243	response to organonitrogen compound	biological_process	0.10967	1	1	605	2	10392	FBgn0036932	-|
GO:0010647	positive regulation of cell communication	biological_process	0.10967	1	1	605	2	10392	FBgn0036932	-|
GO:0010740	positive regulation of intracellular protein kinase cascade	biological_process	0.10967	1	1	605	2	10392	FBgn0036932	-|
GO:0023056	positive regulation of signaling	biological_process	0.10967	1	1	605	2	10392	FBgn0036932	-|
GO:0031902	late endosome membrane	cellular_component	0.10967	1	1	605	2	10392	FBgn0036932	-|
GO:0032008	positive regulation of TOR signaling cascade	biological_process	0.10967	1	1	605	2	10392	FBgn0036932	-|
GO:0032439	endosome localization	biological_process	0.10967	1	1	605	2	10392	FBgn0036932	-|
GO:0042632	cholesterol homeostasis	biological_process	0.10967	1	1	605	2	10392	FBgn0036932	-|
GO:0043200	response to amino acid stimulus	biological_process	0.10967	1	1	605	2	10392	FBgn0036932	-|
GO:0043410	positive regulation of MAPK cascade	biological_process	0.10967	1	1	605	2	10392	FBgn0036932	-|
GO:0044440	endosomal part	cellular_component	0.10967	1	1	605	2	10392	FBgn0036932	-|
GO:0045121	membrane raft	cellular_component	0.10967	1	1	605	2	10392	FBgn0036932	-|
GO:0048584	positive regulation of response to stimulus	biological_process	0.10967	1	1	605	2	10392	FBgn0036932	-|
GO:0051640	organelle localization	biological_process	0.10967	1	1	605	2	10392	FBgn0036932	-|
GO:0055088	lipid homeostasis	biological_process	0.10967	1	1	605	2	10392	FBgn0036932	-|
GO:0055092	sterol homeostasis	biological_process	0.10967	1	1	605	2	10392	FBgn0036932	-|
GO:0071230	cellular response to amino acid stimulus	biological_process	0.10967	1	1	605	2	10392	FBgn0036932	-|
GO:0071417	cellular response to organonitrogen compound	biological_process	0.10967	1	1	605	2	10392	FBgn0036932	-|
GO:0071986	Ragulator complex	cellular_component	0.10967	1	1	605	2	10392	FBgn0036932	-|
GO:1901698	response to nitrogen compound	biological_process	0.10967	1	1	605	2	10392	FBgn0036932	-|
GO:1901699	cellular response to nitrogen compound	biological_process	0.10967	1	1	605	2	10392	FBgn0036932	-|
GO:1901700	response to oxygen-containing compound	biological_process	0.10967	1	1	605	2	10392	FBgn0036932	-|
GO:1901701	cellular response to oxygen-containing compound	biological_process	0.10967	1	1	605	2	10392	FBgn0036932	-|
GO:0005133	interferon-gamma receptor binding	molecular_function	0.11003	1	1	605	2	10392	FBgn0038186	-|
GO:0004379	glycylpeptide N-tetradecanoyltransferase activity	molecular_function	0.11022	1	1	605	2	10392	FBgn0020392	-|
GO:0019107	myristoyltransferase activity	molecular_function	0.11022	1	1	605	2	10392	FBgn0020392	-|
GO:0006996	organelle organization	biological_process	0.11078	1	29	605	386	10392	FBgn0010315,FBgn0005624,FBgn0266429,FBgn0051703,FBgn0038248,FBgn0260442,FBgn0036612,FBgn0052791,FBgn0031781,FBgn0266084,FBgn0003882,FBgn0051702,FBgn0001170,FBgn0260794,FBgn0030869,FBgn0035845,FBgn0038165,FBgn0036576,FBgn0036920,FBgn0000308,FBgn0030874,FBgn0263782,FBgn0038252,FBgn0036932,FBgn0051244,FBgn0030486,FBgn0039617,FBgn0266521,FBgn0031886	-|-|-|-|-|-|-|-|-|-|-|-|-|-|-|-|-|-|-|-|-|-|-|-|-|-|-|-|-|
GO:0042132	fructose 1,6-bisphosphate 1-phosphatase activity	molecular_function	0.11086	1	1	605	2	10392	FBgn0030891	-|
GO:0016882	cyclo-ligase activity	molecular_function	0.11086	1	1	605	2	10392	FBgn0263594	-|
GO:0030272	5-formyltetrahydrofolate cyclo-ligase activity	molecular_function	0.11086	1	1	605	2	10392	FBgn0263594	-|
GO:0005092	GDP-dissociation inhibitor activity	molecular_function	0.11095	1	1	605	2	10392	FBgn0036921	-|
GO:0005094	Rho GDP-dissociation inhibitor activity	molecular_function	0.11095	1	1	605	2	10392	FBgn0036921	-|
GO:0003877	ATP adenylyltransferase activity	molecular_function	0.11097	1	1	605	2	10392	FBgn0030707	-|
GO:0042555	MCM complex	cellular_component	0.11109	1	1	605	2	10392	FBgn0030904	-|
GO:0042151	nematocyst	cellular_component	0.11166	1	1	605	2	10392	FBgn0030719	-|
GO:0032787	monocarboxylic acid metabolic process	biological_process	0.11233	1	7	605	70	10392	FBgn0034184,FBgn0031775,FBgn0033769,FBgn0001941,FBgn0039632,FBgn0030485,FBgn0039113	-|-|-|-|-|-|-|
GO:0003857	3-hydroxyacyl-CoA dehydrogenase activity	molecular_function	0.11366	1	3	605	21	10392	FBgn0033769,FBgn0031775,FBgn0034184	-|-|-|
GO:0004652	polynucleotide adenylyltransferase activity	molecular_function	0.11381	1	1	605	2	10392	FBgn0037249	-|
GO:0042602	riboflavin reductase (NADPH) activity	molecular_function	0.11416	1	1	605	2	10392	FBgn0030724	-|
GO:0005521	lamin binding	molecular_function	0.11451	1	1	605	2	10392	FBgn0030477	-|
GO:0005096	GTPase activator activity	molecular_function	0.11548	1	7	605	69	10392	FBgn0266521,FBgn0086686,FBgn0038653,FBgn0003969,FBgn0003392,FBgn0261570,FBgn0035916	-|-|-|-|-|-|-|
GO:0032502	developmental process	biological_process	0.11617	1	17	605	210	10392	FBgn0265623,FBgn0030877,FBgn0030468,FBgn0036591,FBgn0264741,FBgn0000355,FBgn0000356,FBgn0038244,FBgn0263258,FBgn0039115,FBgn0003882,FBgn0000463,FBgn0011743,FBgn0000358,FBgn0000357,FBgn0042201,FBgn0010453	-|-|-|-|-|-|-|-|-|-|-|-|-|-|-|-|-|
GO:0008324	cation transmembrane transporter activity	molecular_function	0.11664	1	42	605	591	10392	FBgn0259168,FBgn0052792,FBgn0029762,FBgn0036155,FBgn0039641,FBgn0029761,FBgn0015793,FBgn0028668,FBgn0011509,FBgn0264493,FBgn0030897,FBgn0263346,FBgn0261566,FBgn0053061,FBgn0038246,FBgn0030869,FBgn0034159,FBgn0035866,FBgn0028667,FBgn0014869,FBgn0001170,FBgn0037239,FBgn0029672,FBgn0261507,FBgn0038235,FBgn0039635,FBgn0039637,FBgn0027581,FBgn0262513,FBgn0264903,FBgn0036594,FBgn0011286,FBgn0037231,FBg…	-|-|-|-|-|-|-|-|-|-|-|-|-|-|-|-|-|-|-|-|-|-|-|-|-|-|-|-|-|-|-|-|-|-|-|-|-|-|-|-|-|-|
GO:0008063	Toll signaling pathway	biological_process	0.11666	1	1	605	2	10392	FBgn0025574	-|
GO:0015988	energy coupled proton transmembrane transport, against electrochemical gradient	biological_process	0.11675	1	8	605	85	10392	FBgn0014869,FBgn0028667,FBgn0261507,FBgn0039635,FBgn0262513,FBgn0028668,FBgn0037231,FBgn0028671	-|-|-|-|-|-|-|-|
GO:0015991	ATP hydrolysis coupled proton transport	biological_process	0.11675	1	8	605	85	10392	FBgn0261507,FBgn0014869,FBgn0028667,FBgn0028671,FBgn0037231,FBgn0028668,FBgn0039635,FBgn0262513	-|-|-|-|-|-|-|-|
GO:0016810	hydrolase activity, acting on carbon-nitrogen (but not peptide) bonds	molecular_function	0.117	1	7	605	70	10392	FBgn0043575,FBgn0033327,FBgn0034197,FBgn0043576,FBgn0261625,FBgn0030467,FBgn0259110	-|-|-|-|-|-|-|
GO:0005577	fibrinogen complex	cellular_component	0.11724	1	3	605	21	10392	FBgn0051909,FBgn0036929,FBgn0036593	-|-|-|
GO:0030168	platelet activation	biological_process	0.11724	1	3	605	21	10392	FBgn0036593,FBgn0036929,FBgn0051909	-|-|-|
GO:0004019	adenylosuccinate synthase activity	molecular_function	0.11733	1	1	605	2	10392	FBgn0023172	-|
GO:0007051	spindle organization	biological_process	0.1174	1	1	605	2	10392	FBgn0036576	-|
GO:0007052	mitotic spindle organization	biological_process	0.1174	1	1	605	2	10392	FBgn0036576	-|
GO:0030472	mitotic spindle organization in nucleus	biological_process	0.1174	1	1	605	2	10392	FBgn0036576	-|
GO:0001726	ruffle	cellular_component	0.11771	1	1	605	2	10392	FBgn0260442	-|
GO:0031252	cell leading edge	cellular_component	0.11771	1	1	605	2	10392	FBgn0260442	-|
GO:0031704	apelin receptor binding	molecular_function	0.11776	1	1	605	2	10392	FBgn0037236	-|
GO:0005861	troponin complex	cellular_component	0.11796	1	1	605	2	10392	FBgn0004028	-|
GO:0005865	striated muscle thin filament	cellular_component	0.11796	1	1	605	2	10392	FBgn0004028	-|
GO:0030016	myofibril	cellular_component	0.11796	1	1	605	2	10392	FBgn0004028	-|
GO:0030017	sarcomere	cellular_component	0.11796	1	1	605	2	10392	FBgn0004028	-|
GO:0036379	myofilament	cellular_component	0.11796	1	1	605	2	10392	FBgn0004028	-|
GO:0043292	contractile fiber	cellular_component	0.11796	1	1	605	2	10392	FBgn0004028	-|
GO:0044449	contractile fiber part	cellular_component	0.11796	1	1	605	2	10392	FBgn0004028	-|
GO:0048856	anatomical structure development	biological_process	0.12014	1	9	605	98	10392	FBgn0011743,FBgn0003882,FBgn0263258,FBgn0039115,FBgn0036591,FBgn0264741,FBgn0042201,FBgn0030877,FBgn0265623	-|-|-|-|-|-|-|-|-|
GO:0000087	M phase of mitotic cell cycle	biological_process	0.12045	1	1	605	2	10392	FBgn0029667	-|
GO:0007029	endoplasmic reticulum organization	biological_process	0.12168	1	1	605	2	10392	FBgn0266429	-|
GO:0007276	gamete generation	biological_process	0.12264	1	4	605	32	10392	FBgn0263258,FBgn0036591,FBgn0265623,FBgn0042201	-|-|-|-|
GO:0016485	protein processing	biological_process	0.12282	1	5	605	45	10392	FBgn0036924,FBgn0085313,FBgn0261545,FBgn0085391,FBgn0034186	-|-|-|-|-|
GO:0051604	protein maturation	biological_process	0.12282	1	5	605	45	10392	FBgn0034186,FBgn0085391,FBgn0261545,FBgn0085313,FBgn0036924	-|-|-|-|-|
GO:0001933	negative regulation of protein phosphorylation	biological_process	0.12357	1	1	605	2	10392	FBgn0029761	-|
GO:0004862	cAMP-dependent protein kinase inhibitor activity	molecular_function	0.12357	1	1	605	2	10392	FBgn0029761	-|
GO:0006469	negative regulation of protein kinase activity	biological_process	0.12357	1	1	605	2	10392	FBgn0029761	-|
GO:0031400	negative regulation of protein modification process	biological_process	0.12357	1	1	605	2	10392	FBgn0029761	-|
GO:0033673	negative regulation of kinase activity	biological_process	0.12357	1	1	605	2	10392	FBgn0029761	-|
GO:0042326	negative regulation of phosphorylation	biological_process	0.12357	1	1	605	2	10392	FBgn0029761	-|
GO:0051348	negative regulation of transferase activity	biological_process	0.12357	1	1	605	2	10392	FBgn0029761	-|
GO:0031227	intrinsic to endoplasmic reticulum membrane	cellular_component	0.12385	1	3	605	21	10392	FBgn0039117,FBgn0034197,FBgn0266429	-|-|-|
GO:0042592	homeostatic process	biological_process	0.12688	1	10	605	114	10392	FBgn0036932,FBgn0051559,FBgn0039617,FBgn0036579,FBgn0035845,FBgn0036576,FBgn0266489,FBgn0029662,FBgn0011286,FBgn0027581	-|-|-|-|-|-|-|-|-|-|
GO:0044763	single-organism cellular process	biological_process	0.12715	1	183	605	2883	10392	Novel000042,FBgn0035845,FBgn0261570,FBgn0267002,FBgn0004784,FBgn0039116,FBgn0037239,FBgn0004512,FBgn0266429,FBgn0030474,FBgn0039117,FBgn0037231,FBgn0030877,FBgn0025808,FBgn0013809,FBgn0262519,FBgn0052791,FBgn0039637,FBgn0039635,FBgn0042201,FBgn0263219,FBgn0031770,FBgn0038246,FBgn0003969,FBgn0031781,FBgn0025574,FBgn0037238,FBgn0025832,FBgn0034156,FBgn0259168,FBgn0038244,FBgn0030466,FBgn0026417,FBg…	-|-|-|-|-|-|-|-|-|-|-|-|-|-|-|-|-|-|-|-|-|-|-|-|-|-|-|-|-|-|-|-|-|-|-|-|-|-|-|-|-|-|-|-|-|-|-|-|-|-|-|-|-|-|-|-|-|-|-|-|-|-|-|-|-|-|-|-|-|-|-|-|-|-|-|-|-|-|-|-|-|-|-|-|-|-|-|-|-|-|-|-|-|-|-|-|-|-|-|-|-|-|-|-|-|-|-|-|-|-|-|-|-|-|-|-|-|-|-|-|-|-|-|-|-|-|-|-
GO:0009064	glutamine family amino acid metabolic process	biological_process	0.12788	1	3	605	21	10392	FBgn0263608,FBgn0263607,FBgn0261625	-|-|-|
GO:0034613	cellular protein localization	biological_process	0.12886	1	26	605	351	10392	FBgn0036920,FBgn0014877,FBgn0261545,FBgn0035850,Novel000095,FBgn0034205,FBgn0036928,FBgn0003326,FBgn0004784,FBgn0034168,FBgn0031886,FBgn0038652,FBgn0087013,FBgn0039117,FBgn0260442,FBgn0025808,FBgn0036612,FBgn0053180,FBgn0036152,FBgn0030720,FBgn0023172,FBgn0264741,FBgn0036774,FBgn0003093,FBgn0035848,FBgn0003091	-|-|-|-|-|-|-|-|-|-|-|-|-|-|-|-|-|-|-|-|-|-|-|-|-|-|
GO:0070727	cellular macromolecule localization	biological_process	0.12886	1	26	605	351	10392	FBgn0034168,FBgn0087013,FBgn0038652,FBgn0031886,FBgn0036920,FBgn0004784,FBgn0003326,FBgn0034205,Novel000095,FBgn0036928,FBgn0035850,FBgn0014877,FBgn0261545,FBgn0023172,FBgn0035848,FBgn0003091,FBgn0003093,FBgn0036774,FBgn0264741,FBgn0039117,FBgn0260442,FBgn0030720,FBgn0053180,FBgn0036612,FBgn0036152,FBgn0025808	-|-|-|-|-|-|-|-|-|-|-|-|-|-|-|-|-|-|-|-|-|-|-|-|-|-|
GO:0000145	exocyst	cellular_component	0.12936	1	2	605	11	10392	FBgn0031886,FBgn0000611	-|-|
GO:0044699	single-organism process	biological_process	0.13025	1	214	605	3408	10392	FBgn0037239,FBgn0030715,FBgn0004512,FBgn0039116,FBgn0039637,FBgn0052791,FBgn0039635,FBgn0030877,FBgn0025808,FBgn0262519,FBgn0013809,FBgn0039117,FBgn0037231,FBgn0266429,FBgn0030474,Novel000042,FBgn0030482,FBgn0004784,FBgn0267002,FBgn0261570,FBgn0039424,FBgn0035845,FBgn0038244,FBgn0030466,FBgn0052792,FBgn0000356,FBgn0259168,FBgn0025574,FBgn0025832,FBgn0037238,FBgn0034156,FBgn0029762,FBgn0003969,FBg…	-|-|-|-|-|-|-|-|-|-|-|-|-|-|-|-|-|-|-|-|-|-|-|-|-|-|-|-|-|-|-|-|-|-|-|-|-|-|-|-|-|-|-|-|-|-|-|-|-|-|-|-|-|-|-|-|-|-|-|-|-|-|-|-|-|-|-|-|-|-|-|-|-|-|-|-|-|-|-|-|-|-|-|-|-|-|-|-|-|-|-|-|-|-|-|-|-|-|-|-|-|-|-|-|-|-|-|-|-|-|-|-|-|-|-|-|-|-|-|-|-|-|-|-|-|-|-|-
GO:0015995	chlorophyll biosynthetic process	biological_process	0.13132	1	7	605	73	10392	FBgn0036159,FBgn0030871,FBgn0028684,FBgn0000346,FBgn0030468,FBgn0266464,FBgn0028868	-|-|-|-|-|-|-|
GO:1901564	organonitrogen compound metabolic process	biological_process	0.13143	1	61	605	906	10392	FBgn0004512,FBgn0033774,FBgn0040950,FBgn0025808,FBgn0263608,FBgn0262882,FBgn0036612,FBgn0043575,FBgn0033769,FBgn0083228,FBgn0030478,FBgn0038653,FBgn0035854,FBgn0004456,Novel000079,FBgn0035916,FBgn0003380,FBgn0001942,FBgn0036157,FBgn0036915,FBgn0033853,FBgn0000346,FBgn0040687,FBgn0263607,FBgn0035844,FBgn0261625,FBgn0266464,FBgn0035915,FBgn0263782,FBgn0036924,FBgn0028868,FBgn0033327,FBgn0035845,FBg…	-|-|-|-|-|-|-|-|-|-|-|-|-|-|-|-|-|-|-|-|-|-|-|-|-|-|-|-|-|-|-|-|-|-|-|-|-|-|-|-|-|-|-|-|-|-|-|-|-|-|-|-|-|-|-|-|-|-|-|-|-|
GO:0022890	inorganic cation transmembrane transporter activity	molecular_function	0.13196	1	32	605	443	10392	FBgn0036594,FBgn0011286,FBgn0264903,FBgn0262513,FBgn0027581,FBgn0039635,FBgn0024184,FBgn0266489,FBgn0037231,FBgn0003380,FBgn0029672,FBgn0035866,FBgn0028667,FBgn0014869,FBgn0261507,FBgn0022981,FBgn0035915,FBgn0035845,FBgn0028671,FBgn0039424,FBgn0029663,FBgn0011509,FBgn0028668,FBgn0015793,FBgn0264493,FBgn0052792,FBgn0029761,FBgn0029762,FBgn0261566,FBgn0038246,FBgn0030897,FBgn0263346	-|-|-|-|-|-|-|-|-|-|-|-|-|-|-|-|-|-|-|-|-|-|-|-|-|-|-|-|-|-|-|-|
GO:0001775	cell activation	biological_process	0.13362	1	3	605	22	10392	FBgn0036593,FBgn0036929,FBgn0051909	-|-|-|
GO:0051493	regulation of cytoskeleton organization	biological_process	0.13455	1	2	605	11	10392	FBgn0266521,FBgn0031781	-|-|
GO:0044780	bacterial-type flagellum assembly	biological_process	0.13681	1	2	605	11	10392	FBgn0003882,FBgn0263782	-|-|
GO:0006605	protein targeting	biological_process	0.13799	1	9	605	102	10392	FBgn0030720,FBgn0003326,FBgn0036928,FBgn0025808,FBgn0261545,FBgn0036920,FBgn0035848,FBgn0036774,FBgn0031886	-|-|-|-|-|-|-|-|-|
GO:0016011	dystroglycan complex	cellular_component	0.13842	1	2	605	11	10392	FBgn0030895,FBgn0036612	-|-|
GO:0016012	sarcoglycan complex	cellular_component	0.13842	1	2	605	11	10392	FBgn0036612,FBgn0030895	-|-|
GO:0004888	transmembrane signaling receptor activity	molecular_function	0.14156	1	24	605	321	10392	FBgn0034168,FBgn0029768,FBgn0028963,FBgn0035847,FBgn0003248,FBgn0259683,FBgn0039419,FBgn0031770,FBgn0030482,FBgn0263782,FBgn0053639,FBgn0037408,FBgn0003169,FBgn0263512,FBgn0037399,FBgn0001085,FBgn0036934,FBgn0030466,FBgn0030715,FBgn0087012,FBgn0266429,FBgn0038653,FBgn0035870,FBgn0011286	-|-|-|-|-|-|-|-|-|-|-|-|-|-|-|-|-|-|-|-|-|-|-|-|
GO:0007205	protein kinase C-activating G-protein coupled receptor signaling pathway	biological_process	0.14157	1	2	605	11	10392	FBgn0020930,FBgn0033853	-|-|
GO:0016668	oxidoreductase activity, acting on a sulfur group of donors, NAD(P) as acceptor	molecular_function	0.14159	1	3	605	22	10392	FBgn0003091,FBgn0003093,FBgn0023172	-|-|-|
GO:0047134	protein-disulfide reductase activity	molecular_function	0.14159	1	3	605	22	10392	FBgn0003093,FBgn0003091,FBgn0023172	-|-|-|
GO:0008831	dTDP-4-dehydrorhamnose reductase activity	molecular_function	0.14363	1	3	605	23	10392	FBgn0033769,FBgn0039620,FBgn0035848	-|-|-|
GO:0003779	actin binding	molecular_function	0.14421	1	11	605	126	10392	FBgn0014870,FBgn0010315,FBgn0030869,FBgn0038248,FBgn0260442,FBgn0038165,FBgn0024189,FBgn0000308,FBgn0052791,FBgn0266084,FBgn0263396	-|-|-|-|-|-|-|-|-|-|-|
GO:0009966	regulation of signal transduction	biological_process	0.14427	1	12	605	141	10392	FBgn0086686,FBgn0034194,FBgn0003392,FBgn0261570,FBgn0035916,FBgn0038653,FBgn0050456,FBgn0266521,FBgn0025836,FBgn0036932,FBgn0023172,FBgn0003969	-|-|-|-|-|-|-|-|-|-|-|-|
GO:0010646	regulation of cell communication	biological_process	0.14427	1	12	605	141	10392	FBgn0025836,FBgn0036932,FBgn0023172,FBgn0003969,FBgn0050456,FBgn0266521,FBgn0003392,FBgn0261570,FBgn0035916,FBgn0038653,FBgn0086686,FBgn0034194	-|-|-|-|-|-|-|-|-|-|-|-|
GO:0016667	oxidoreductase activity, acting on a sulfur group of donors	molecular_function	0.14463	1	7	605	75	10392	FBgn0023172,FBgn0051559,FBgn0029662,FBgn0037232,FBgn0003093,FBgn0003091,FBgn0036579	-|-|-|-|-|-|-|
GO:0006364	rRNA processing	biological_process	0.14593	1	6	605	62	10392	FBgn0031777,FBgn0030704,FBgn0030720,FBgn0039627,FBgn0037250,FBgn0038189	-|-|-|-|-|-|
GO:0016072	rRNA metabolic process	biological_process	0.14593	1	6	605	62	10392	FBgn0031777,FBgn0030704,FBgn0030720,FBgn0039627,FBgn0037250,FBgn0038189	-|-|-|-|-|-|
GO:0003676	nucleic acid binding	molecular_function	0.14712	1	122	605	1904	10392	FBgn0036775,FBgn0003882,FBgn0000463,FBgn0034187,FBgn0008646,FBgn0039625,FBgn0003091,FBgn0001170,FBgn0017430,FBgn0266489,FBgn0024184,FBgn0028692,FBgn0262508,FBgn0031900,FBgn0261113,FBgn0030878,FBgn0261085,FBgn0052364,FBgn0000346,FBgn0030710,FBgn0036919,FBgn0040466,FBgn0086784,FBgn0001942,FBgn0085391,FBgn0038251,FBgn0037232,FBgn0041605,FBgn0263782,FBgn0010488,FBgn0028868,FBgn0022981,Novel000065,FBg…	-|-|-|-|-|-|-|-|-|-|-|-|-|-|-|-|-|-|-|-|-|-|-|-|-|-|-|-|-|-|-|-|-|-|-|-|-|-|-|-|-|-|-|-|-|-|-|-|-|-|-|-|-|-|-|-|-|-|-|-|-|-|-|-|-|-|-|-|-|-|-|-|-|-|-|-|-|-|-|-|-|-|-|-|-|-|-|-|-|-|-|-|-|-|-|-|-|-|-|-|-|-|-|-|-|-|-|-|-|-|-|-|-|-|-|-|-|-|-|-|-|-|
GO:0038023	signaling receptor activity	molecular_function	0.14879	1	27	605	368	10392	FBgn0259683,FBgn0039419,FBgn0038693,FBgn0031770,FBgn0030482,FBgn0053639,FBgn0263782,FBgn0036154,FBgn0037408,FBgn0003169,FBgn0263512,FBgn0034168,FBgn0029768,FBgn0028963,FBgn0035847,FBgn0003248,FBgn0266429,FBgn0087012,FBgn0038653,FBgn0011286,FBgn0035870,FBgn0035849,FBgn0001085,FBgn0037399,FBgn0036934,FBgn0030466,FBgn0030715	-|-|-|-|-|-|-|-|-|-|-|-|-|-|-|-|-|-|-|-|-|-|-|-|-|-|-|
GO:0071822	protein complex subunit organization	biological_process	0.14976	1	11	605	132	10392	FBgn0031781,FBgn0036929,FBgn0264493,FBgn0037244,FBgn0263606,FBgn0003060,FBgn0004456,FBgn0036576,FBgn0003380,FBgn0051909,FBgn0036593	-|-|-|-|-|-|-|-|-|-|-|
GO:0033865	nucleoside bisphosphate metabolic process	biological_process	0.15186	1	2	605	12	10392	FBgn0036781,FBgn0263782	-|-|
GO:0033875	ribonucleoside bisphosphate metabolic process	biological_process	0.15186	1	2	605	12	10392	FBgn0036781,FBgn0263782	-|-|
GO:0034032	purine nucleoside bisphosphate metabolic process	biological_process	0.15186	1	2	605	12	10392	FBgn0036781,FBgn0263782	-|-|
GO:0030029	actin filament-based process	biological_process	0.1543	1	3	605	23	10392	FBgn0031781,FBgn0266084,FBgn0000308	-|-|-|
GO:0030036	actin cytoskeleton organization	biological_process	0.1543	1	3	605	23	10392	FBgn0031781,FBgn0266084,FBgn0000308	-|-|-|
GO:0004535	poly(A)-specific ribonuclease activity	molecular_function	0.15468	1	2	605	11	10392	FBgn0085383,FBgn0085391	-|-|
GO:0007010	cytoskeleton organization	biological_process	0.15511	1	12	605	144	10392	FBgn0266084,FBgn0031781,FBgn0266521,FBgn0010315,FBgn0030869,FBgn0038165,FBgn0036576,FBgn0038248,FBgn0260442,FBgn0000308,FBgn0036612,FBgn0052791	-|-|-|-|-|-|-|-|-|-|-|-|
GO:0016851	magnesium chelatase activity	molecular_function	0.1573	1	6	605	63	10392	FBgn0000346,FBgn0028684,FBgn0036159,FBgn0030871,FBgn0028868,FBgn0266464	-|-|-|-|-|-|
GO:0051002	ligase activity, forming nitrogen-metal bonds	molecular_function	0.1573	1	6	605	63	10392	FBgn0030871,FBgn0036159,FBgn0000346,FBgn0028684,FBgn0266464,FBgn0028868	-|-|-|-|-|-|
GO:0051003	ligase activity, forming nitrogen-metal bonds, forming coordination complexes	molecular_function	0.1573	1	6	605	63	10392	FBgn0028684,FBgn0000346,FBgn0030871,FBgn0036159,FBgn0266464,FBgn0028868	-|-|-|-|-|-|
GO:0045226	extracellular polysaccharide biosynthetic process	biological_process	0.15823	1	3	605	24	10392	FBgn0033769,FBgn0039620,FBgn0035848	-|-|-|
GO:0046379	extracellular polysaccharide metabolic process	biological_process	0.15823	1	3	605	24	10392	FBgn0039620,FBgn0033769,FBgn0035848	-|-|-|
GO:0009877	nodulation	biological_process	0.15849	1	3	605	24	10392	FBgn0038191,FBgn0039115,FBgn0003882	-|-|-|
GO:0033177	proton-transporting two-sector ATPase complex, proton-transporting domain	cellular_component	0.15861	1	10	605	118	10392	FBgn0261507,FBgn0014869,FBgn0028667,FBgn0003380,FBgn0037231,FBgn0028671,FBgn0039635,FBgn0035915,FBgn0262513,FBgn0028668	-|-|-|-|-|-|-|-|-|-|
GO:0003968	RNA-directed RNA polymerase activity	molecular_function	0.15894	1	4	605	36	10392	FBgn0261683,FBgn0261697,FBgn0085407,FBgn0000121	-|-|-|-|
GO:0015556	C4-dicarboxylate transmembrane transporter activity	molecular_function	0.15897	1	1	605	3	10392	FBgn0036928	-|
GO:0000122	negative regulation of transcription from RNA polymerase II promoter	biological_process	0.15905	1	1	605	3	10392	FBgn0038251	-|
GO:0015994	chlorophyll metabolic process	biological_process	0.15948	1	7	605	77	10392	FBgn0000346,FBgn0028684,FBgn0030871,FBgn0036159,FBgn0266464,FBgn0028868,FBgn0030468	-|-|-|-|-|-|-|
GO:0023051	regulation of signaling	biological_process	0.15954	1	12	605	144	10392	FBgn0035916,FBgn0003392,FBgn0261570,FBgn0038653,FBgn0086686,FBgn0034194,FBgn0025836,FBgn0023172,FBgn0003969,FBgn0036932,FBgn0266521,FBgn0050456	-|-|-|-|-|-|-|-|-|-|-|-|
GO:0042262	DNA protection	biological_process	0.16076	1	1	605	3	10392	FBgn0041780	-|
GO:0008203	cholesterol metabolic process	biological_process	0.16121	1	1	605	3	10392	FBgn0030895	-|
GO:0000165	MAPK cascade	biological_process	0.16139	1	1	605	3	10392	FBgn0036932	-|
GO:0007243	intracellular protein kinase cascade	biological_process	0.16139	1	1	605	3	10392	FBgn0036932	-|
GO:0010627	regulation of intracellular protein kinase cascade	biological_process	0.16139	1	1	605	3	10392	FBgn0036932	-|
GO:0043408	regulation of MAPK cascade	biological_process	0.16139	1	1	605	3	10392	FBgn0036932	-|
GO:0051082	unfolded protein binding	molecular_function	0.16186	1	6	605	64	10392	FBgn0035852,FBgn0037231,FBgn0051559,FBgn0031776,FBgn0029662,FBgn0036918	-|-|-|-|-|-|
GO:0006783	heme biosynthetic process	biological_process	0.16198	1	3	605	24	10392	FBgn0264493,FBgn0033769,FBgn0029113	-|-|-|
GO:0004813	alanine-tRNA ligase activity	molecular_function	0.16222	1	1	605	3	10392	FBgn0029664	-|
GO:0006419	alanyl-tRNA aminoacylation	biological_process	0.16222	1	1	605	3	10392	FBgn0029664	-|
GO:0003830	beta-1,4-mannosylglycoprotein 4-beta-N-acetylglucosaminyltransferase activity	molecular_function	0.16262	1	1	605	3	10392	FBgn0005596	-|
GO:0008131	primary amine oxidase activity	molecular_function	0.16305	1	1	605	3	10392	FBgn0001942	-|
GO:0015939	pantothenate metabolic process	biological_process	0.16383	1	1	605	3	10392	FBgn0262882	-|
GO:0015940	pantothenate biosynthetic process	biological_process	0.16383	1	1	605	3	10392	FBgn0262882	-|
GO:0015179	L-amino acid transmembrane transporter activity	molecular_function	0.16385	1	1	605	3	10392	FBgn0032988	-|
GO:0019541	propionate metabolic process	biological_process	0.16434	1	1	605	3	10392	FBgn0039632	-|
GO:0019543	propionate catabolic process	biological_process	0.16434	1	1	605	3	10392	FBgn0039632	-|
GO:0019626	short-chain fatty acid catabolic process	biological_process	0.16434	1	1	605	3	10392	FBgn0039632	-|
GO:0046459	short-chain fatty acid metabolic process	biological_process	0.16434	1	1	605	3	10392	FBgn0039632	-|
GO:0047547	2-methylcitrate dehydratase activity	molecular_function	0.16434	1	1	605	3	10392	FBgn0039632	-|
GO:0043631	RNA polyadenylation	biological_process	0.16438	1	1	605	3	10392	FBgn0037249	-|
GO:0044403	symbiosis, encompassing mutualism through parasitism	biological_process	0.1648	1	27	605	374	10392	FBgn0261574,FBgn0051495,FBgn0039633,FBgn0038191,FBgn0001942,FBgn0000346,FBgn0261673,FBgn0266464,FBgn0028868,FBgn0004638,FBgn0034186,FBgn0038239,FBgn0022724,FBgn0036159,FBgn0261571,FBgn0261802,FBgn0039115,FBgn0036929,FBgn0025836,FBgn0003882,FBgn0029761,FBgn0024555,FBgn0262513,FBgn0085313,FBgn0038242,FBgn0033785,FBgn0000121	-|-|-|-|-|-|-|-|-|-|-|-|-|-|-|-|-|-|-|-|-|-|-|-|-|-|-|
GO:0044419	interspecies interaction between organisms	biological_process	0.1648	1	27	605	374	10392	FBgn0025836,FBgn0029761,FBgn0003882,FBgn0039115,FBgn0036929,FBgn0038242,FBgn0033785,FBgn0000121,FBgn0262513,FBgn0024555,FBgn0085313,FBgn0000346,FBgn0051495,FBgn0261574,FBgn0001942,FBgn0038191,FBgn0039633,FBgn0038239,FBgn0261802,FBgn0261571,FBgn0022724,FBgn0036159,FBgn0028868,FBgn0266464,FBgn0261673,FBgn0034186,FBgn0004638	-|-|-|-|-|-|-|-|-|-|-|-|-|-|-|-|-|-|-|-|-|-|-|-|-|-|-|
GO:0005212	structural constituent of eye lens	molecular_function	0.16538	1	1	605	3	10392	FBgn0029113	-|
GO:0000149	SNARE binding	molecular_function	0.16542	1	1	605	3	10392	FBgn0041605	-|
GO:0019905	syntaxin binding	molecular_function	0.16542	1	1	605	3	10392	FBgn0041605	-|
GO:0048583	regulation of response to stimulus	biological_process	0.16569	1	12	605	145	10392	FBgn0003392,FBgn0261570,FBgn0035916,FBgn0038653,FBgn0086686,FBgn0034194,FBgn0025836,FBgn0036932,FBgn0023172,FBgn0003969,FBgn0050456,FBgn0266521	-|-|-|-|-|-|-|-|-|-|-|-|
GO:0030541	plasmid partitioning	biological_process	0.16578	1	1	605	3	10392	FBgn0003326	-|
GO:0016272	prefoldin complex	cellular_component	0.16636	1	3	605	25	10392	FBgn0031776,FBgn0037231,FBgn0036918	-|-|-|
GO:0019203	carbohydrate phosphatase activity	molecular_function	0.1664	1	1	605	3	10392	FBgn0030891	-|
GO:0050308	sugar-phosphatase activity	molecular_function	0.1664	1	1	605	3	10392	FBgn0030891	-|
GO:0016503	pheromone receptor activity	molecular_function	0.16654	1	1	605	3	10392	FBgn0039419	-|
GO:0008047	enzyme activator activity	molecular_function	0.16662	1	8	605	90	10392	FBgn0038653,FBgn0003392,FBgn0261570,FBgn0035916,FBgn0086686,FBgn0003326,FBgn0003969,FBgn0266521	-|-|-|-|-|-|-|-|
GO:0001505	regulation of neurotransmitter levels	biological_process	0.1674	1	1	605	3	10392	FBgn0035872	-|
GO:0003001	generation of a signal involved in cell-cell signaling	biological_process	0.1674	1	1	605	3	10392	FBgn0035872	-|
GO:0007269	neurotransmitter secretion	biological_process	0.1674	1	1	605	3	10392	FBgn0035872	-|
GO:0008021	synaptic vesicle	cellular_component	0.1674	1	1	605	3	10392	FBgn0035872	-|
GO:0023061	signal release	biological_process	0.1674	1	1	605	3	10392	FBgn0035872	-|
GO:0003980	UDP-glucose:glycoprotein glucosyltransferase activity	molecular_function	0.16763	1	1	605	3	10392	FBgn0259683	-|
GO:0019295	coenzyme M biosynthetic process	biological_process	0.16792	1	1	605	3	10392	FBgn0032981	-|
GO:0019296	coenzyme M metabolic process	biological_process	0.16792	1	1	605	3	10392	FBgn0032981	-|
GO:0006082	organic acid metabolic process	biological_process	0.16851	1	23	605	318	10392	FBgn0029664,FBgn0036157,FBgn0030485,FBgn0039632,FBgn0025837,FBgn0010591,FBgn0034184,FBgn0087039,FBgn0265089,FBgn0263607,FBgn0039113,FBgn0261625,FBgn0036927,FBgn0031775,FBgn0263594,FBgn0001941,FBgn0033774,FBgn0004456,FBgn0033769,FBgn0035854,FBgn0030478,FBgn0263608,FBgn0262882	-|-|-|-|-|-|-|-|-|-|-|-|-|-|-|-|-|-|-|-|-|-|-|
GO:0019752	carboxylic acid metabolic process	biological_process	0.16851	1	23	605	318	10392	FBgn0262882,FBgn0263608,FBgn0004456,FBgn0035854,FBgn0030478,FBgn0033769,FBgn0001941,FBgn0033774,FBgn0031775,FBgn0263594,FBgn0265089,FBgn0087039,FBgn0261625,FBgn0036927,FBgn0039113,FBgn0263607,FBgn0010591,FBgn0025837,FBgn0034184,FBgn0036157,FBgn0039632,FBgn0030485,FBgn0029664	-|-|-|-|-|-|-|-|-|-|-|-|-|-|-|-|-|-|-|-|-|-|-|
GO:0043436	oxoacid metabolic process	biological_process	0.16851	1	23	605	318	10392	FBgn0036157,FBgn0039632,FBgn0030485,FBgn0029664,FBgn0087039,FBgn0265089,FBgn0036927,FBgn0261625,FBgn0039113,FBgn0263607,FBgn0034184,FBgn0010591,FBgn0025837,FBgn0001941,FBgn0033774,FBgn0031775,FBgn0263594,FBgn0262882,FBgn0263608,FBgn0004456,FBgn0030478,FBgn0035854,FBgn0033769	-|-|-|-|-|-|-|-|-|-|-|-|-|-|-|-|-|-|-|-|-|-|-|
GO:0003899	DNA-directed RNA polymerase activity	molecular_function	0.16904	1	9	605	106	10392	FBgn0261570,FBgn0030893,FBgn0263606,FBgn0026749,FBgn0036775,FBgn0037275,FBgn0039631,FBgn0003091,FBgn0034182	-|-|-|-|-|-|-|-|-|
GO:0007265	Ras protein signal transduction	biological_process	0.16912	1	7	605	75	10392	FBgn0025836,FBgn0035916,FBgn0038653,FBgn0023172,FBgn0086686,FBgn0050456,FBgn0034194	-|-|-|-|-|-|-|
GO:0046578	regulation of Ras protein signal transduction	biological_process	0.16912	1	7	605	75	10392	FBgn0050456,FBgn0034194,FBgn0086686,FBgn0038653,FBgn0023172,FBgn0035916,FBgn0025836	-|-|-|-|-|-|-|
GO:0003917	DNA topoisomerase type I activity	molecular_function	0.17127	1	1	605	3	10392	FBgn0261545	-|
GO:0046849	bone remodeling	biological_process	0.17178	1	1	605	3	10392	FBgn0038167	-|
GO:0048771	tissue remodeling	biological_process	0.17178	1	1	605	3	10392	FBgn0038167	-|
GO:0031109	microtubule polymerization or depolymerization	biological_process	0.17192	1	1	605	3	10392	FBgn0266521	-|
GO:0031110	regulation of microtubule polymerization or depolymerization	biological_process	0.17192	1	1	605	3	10392	FBgn0266521	-|
GO:0005811	lipid particle	cellular_component	0.17237	1	1	605	3	10392	FBgn0259738	-|
GO:0012511	monolayer-surrounded lipid storage body	cellular_component	0.17237	1	1	605	3	10392	FBgn0259738	-|
GO:0001510	RNA methylation	biological_process	0.17257	1	3	605	25	10392	FBgn0031777,FBgn0037250,FBgn0038189	-|-|-|
GO:0016255	attachment of GPI anchor to protein	biological_process	0.17341	1	1	605	3	10392	FBgn0266429	-|
GO:0070566	adenylyltransferase activity	molecular_function	0.17412	1	2	605	13	10392	FBgn0037249,FBgn0030707	-|-|
GO:0030258	lipid modification	biological_process	0.17511	1	5	605	52	10392	FBgn0039639,FBgn0016672,FBgn0030465,FBgn0026754,FBgn0031887	-|-|-|-|-|
GO:0000175	3'-5'-exoribonuclease activity	molecular_function	0.17577	1	2	605	12	10392	FBgn0085391,FBgn0085383	-|-|
GO:0004022	alcohol dehydrogenase (NAD) activity	molecular_function	0.17711	1	1	605	3	10392	FBgn0086901	-|
GO:0015945	methanol metabolic process	biological_process	0.17711	1	1	605	3	10392	FBgn0086901	-|
GO:0015946	methanol oxidation	biological_process	0.17711	1	1	605	3	10392	FBgn0086901	-|
GO:0034308	primary alcohol metabolic process	biological_process	0.17711	1	1	605	3	10392	FBgn0086901	-|
GO:0006913	nucleocytoplasmic transport	biological_process	0.18058	1	4	605	38	10392	FBgn0261545,FBgn0031886,FBgn0003326,FBgn0035848	-|-|-|-|
GO:0051169	nuclear transport	biological_process	0.18058	1	4	605	38	10392	FBgn0261545,FBgn0031886,FBgn0035848,FBgn0003326	-|-|-|-|
GO:0006629	lipid metabolic process	biological_process	0.18195	1	38	605	556	10392	FBgn0266489,FBgn0032973,FBgn0266429,FBgn0016672,FBgn0033769,FBgn0027581,FBgn0031887,FBgn0259738,FBgn0052220,FBgn0011286,FBgn0031775,FBgn0030864,FBgn0030465,FBgn0030895,FBgn0037279,FBgn0004784,FBgn0038189,FBgn0031773,FBgn0003997,FBgn0039632,FBgn0030485,FBgn0026754,FBgn0031784,FBgn0039639,FBgn0264493,FBgn0052944,FBgn0033844,FBgn0002901,FBgn0032981,FBgn0039627,FBgn0003093,FBgn0001941,FBgn0035848,FBg…	-|-|-|-|-|-|-|-|-|-|-|-|-|-|-|-|-|-|-|-|-|-|-|-|-|-|-|-|-|-|-|-|-|-|-|-|-|-|
GO:0000794	condensed nuclear chromosome	cellular_component	0.18267	1	3	605	25	10392	FBgn0036576,FBgn0026417,FBgn0030874	-|-|-|
GO:0019725	cellular homeostasis	biological_process	0.18448	1	8	605	95	10392	FBgn0036579,FBgn0051559,FBgn0011286,FBgn0027581,FBgn0035845,FBgn0029662,FBgn0266489,FBgn0036576	-|-|-|-|-|-|-|-|
GO:0019538	protein metabolic process	biological_process	0.18451	1	115	605	1826	10392	FBgn0003093,FBgn0037230,FBgn0039420,FBgn0029763,FBgn0033791,FBgn0051702,FBgn0039627,FBgn0001085,FBgn0052944,FBgn0259110,FBgn0041588,FBgn0262607,FBgn0039629,FBgn0031784,FBgn0030719,FBgn0033773,FBgn0052351,FBgn0036416,FBgn0038250,FBgn0038167,FBgn0028737,FBgn0029664,FBgn0035914,FBgn0038233,FBgn0014877,FBgn0003169,FBgn0039419,FBgn0027930,FBgn0259683,FBgn0034159,FBgn0037250,FBgn0033774,Novel000014,FBg…	-|-|-|-|-|-|-|-|-|-|-|-|-|-|-|-|-|-|-|-|-|-|-|-|-|-|-|-|-|-|-|-|-|-|-|-|-|-|-|-|-|-|-|-|-|-|-|-|-|-|-|-|-|-|-|-|-|-|-|-|-|-|-|-|-|-|-|-|-|-|-|-|-|-|-|-|-|-|-|-|-|-|-|-|-|-|-|-|-|-|-|-|-|-|-|-|-|-|-|-|-|-|-|-|-|-|-|-|-|-|-|-|-|-|-|
GO:0044085	cellular component biogenesis	biological_process	0.18697	1	24	605	339	10392	FBgn0031781,FBgn0039627,FBgn0003882,FBgn0038659,FBgn0036929,FBgn0047199,FBgn0264493,FBgn0263606,FBgn0037244,FBgn0003380,FBgn0051909,FBgn0036593,FBgn0030720,FBgn0029664,FBgn0000611,FBgn0038189,FBgn0261574,FBgn0003060,FBgn0037250,FBgn0031777,FBgn0004638,FBgn0030704,FBgn0263782,FBgn0038252	-|-|-|-|-|-|-|-|-|-|-|-|-|-|-|-|-|-|-|-|-|-|-|-|
GO:0007596	blood coagulation	biological_process	0.18773	1	3	605	26	10392	FBgn0051909,FBgn0036929,FBgn0036593	-|-|-|
GO:0030170	pyridoxal phosphate binding	molecular_function	0.18854	1	4	605	39	10392	FBgn0030466,FBgn0036927,FBgn0010591,FBgn0030478	-|-|-|-|
GO:0008527	taste receptor activity	molecular_function	0.18899	1	2	605	14	10392	FBgn0035870,FBgn0030482	-|-|
GO:0009593	detection of chemical stimulus	biological_process	0.18899	1	2	605	14	10392	FBgn0030482,FBgn0035870	-|-|
GO:0050906	detection of stimulus involved in sensory perception	biological_process	0.18899	1	2	605	14	10392	FBgn0035870,FBgn0030482	-|-|
GO:0050907	detection of chemical stimulus involved in sensory perception	biological_process	0.18899	1	2	605	14	10392	FBgn0035870,FBgn0030482	-|-|
GO:0050912	detection of chemical stimulus involved in sensory perception of taste	biological_process	0.18899	1	2	605	14	10392	FBgn0030482,FBgn0035870	-|-|
GO:0042168	heme metabolic process	biological_process	0.19054	1	3	605	26	10392	FBgn0029113,FBgn0033769,FBgn0264493	-|-|-|
GO:0009791	post-embryonic development	biological_process	0.19243	1	2	605	14	10392	FBgn0003882,FBgn0039115	-|-|
GO:0009878	nodule morphogenesis	biological_process	0.19243	1	2	605	14	10392	FBgn0039115,FBgn0003882	-|-|
GO:0009886	post-embryonic morphogenesis	biological_process	0.19243	1	2	605	14	10392	FBgn0039115,FBgn0003882	-|-|
GO:0044111	development involved in symbiotic interaction	biological_process	0.19243	1	2	605	14	10392	FBgn0003882,FBgn0039115	-|-|
GO:0005635	nuclear envelope	cellular_component	0.19432	1	5	605	53	10392	FBgn0003326,FBgn0035848,FBgn0261545,FBgn0031886,FBgn0039120	-|-|-|-|-|
GO:0015031	protein transport	biological_process	0.19502	1	29	605	418	10392	FBgn0036152,FBgn0053180,FBgn0030720,FBgn0025808,FBgn0037231,FBgn0039117,FBgn0008646,FBgn0003093,FBgn0035848,FBgn0003091,FBgn0264741,FBgn0036414,FBgn0036774,FBgn0001085,FBgn0023172,FBgn0034205,Novel000095,FBgn0036928,FBgn0003326,FBgn0004784,FBgn0014877,FBgn0261545,FBgn0035850,FBgn0036920,FBgn0034197,FBgn0034159,FBgn0087013,FBgn0031886,FBgn0035853	-|-|-|-|-|-|-|-|-|-|-|-|-|-|-|-|-|-|-|-|-|-|-|-|-|-|-|-|-|
GO:0045184	establishment of protein localization	biological_process	0.19502	1	29	605	418	10392	FBgn0001085,FBgn0023172,FBgn0264741,FBgn0036774,FBgn0036414,FBgn0008646,FBgn0003093,FBgn0003091,FBgn0035848,FBgn0037231,FBgn0039117,FBgn0025808,FBgn0053180,FBgn0036152,FBgn0030720,FBgn0035853,FBgn0031886,FBgn0087013,FBgn0034159,FBgn0036920,FBgn0034197,FBgn0014877,FBgn0261545,FBgn0035850,FBgn0036928,Novel000095,FBgn0034205,FBgn0003326,FBgn0004784	-|-|-|-|-|-|-|-|-|-|-|-|-|-|-|-|-|-|-|-|-|-|-|-|-|-|-|-|-|
GO:0005083	small GTPase regulator activity	molecular_function	0.19626	1	8	605	93	10392	FBgn0038653,FBgn0035916,FBgn0034194,FBgn0086686,FBgn0036921,FBgn0023172,FBgn0025836,FBgn0050456	-|-|-|-|-|-|-|-|
GO:0051258	protein polymerization	biological_process	0.19646	1	4	605	40	10392	FBgn0036593,FBgn0051909,FBgn0036929,FBgn0031781	-|-|-|-|
GO:0004532	exoribonuclease activity	molecular_function	0.19649	1	2	605	13	10392	FBgn0085383,FBgn0085391	-|-|
GO:0016896	exoribonuclease activity, producing 5'-phosphomonoesters	molecular_function	0.19649	1	2	605	13	10392	FBgn0085391,FBgn0085383	-|-|
GO:0030414	peptidase inhibitor activity	molecular_function	0.19724	1	8	605	97	10392	FBgn0038654,FBgn0051313,FBgn0038243,FBgn0004629,FBgn0036612,FBgn0261567,FBgn0033791,FBgn0026721	-|-|-|-|-|-|-|-|
GO:0061134	peptidase regulator activity	molecular_function	0.19724	1	8	605	97	10392	FBgn0033791,FBgn0261567,FBgn0026721,FBgn0038654,FBgn0051313,FBgn0038243,FBgn0036612,FBgn0004629	-|-|-|-|-|-|-|-|
GO:0016032	viral process	biological_process	0.19789	1	24	605	336	10392	FBgn0000346,FBgn0039633,FBgn0001942,FBgn0261574,FBgn0051495,FBgn0036159,FBgn0022724,FBgn0261802,FBgn0261571,FBgn0038239,FBgn0034186,FBgn0004638,FBgn0261673,FBgn0028868,FBgn0266464,FBgn0029761,FBgn0025836,FBgn0036929,FBgn0033785,FBgn0000121,FBgn0038242,FBgn0024555,FBgn0262513,FBgn0085313	-|-|-|-|-|-|-|-|-|-|-|-|-|-|-|-|-|-|-|-|-|-|-|-|
GO:0044423	virion part	cellular_component	0.1985	1	29	605	411	10392	FBgn0029766,FBgn0034205,FBgn0003326,FBgn0035921,FBgn0024189,FBgn0015270,FBgn0038239,FBgn0036576,FBgn0000358,FBgn0041605,FBgn0038693,FBgn0051495,FBgn0030706,FBgn0259110,FBgn0086686,FBgn0038242,FBgn0038237,FBgn0263258,FBgn0038244,FBgn0036579,FBgn0263396,FBgn0000064,FBgn0260794,FBgn0036591,FBgn0037238,FBgn0031775,FBgn0030864,FBgn0030477,FBgn0029761	-|-|-|-|-|-|-|-|-|-|-|-|-|-|-|-|-|-|-|-|-|-|-|-|-|-|-|-|-|
GO:0004177	aminopeptidase activity	molecular_function	0.19913	1	3	605	26	10392	FBgn0033860,FBgn0052351,FBgn0035915	-|-|-|
GO:0044781	bacterial-type flagellum organization	biological_process	0.19913	1	2	605	14	10392	FBgn0263782,FBgn0003882	-|-|
GO:0006739	NADP metabolic process	biological_process	0.20001	1	3	605	27	10392	FBgn0033853,FBgn0053156,FBgn0033769	-|-|-|
GO:0032940	secretion by cell	biological_process	0.20103	1	5	605	53	10392	FBgn0031886,FBgn0036414,FBgn0008646,FBgn0035872,FBgn0000611	-|-|-|-|-|
GO:0046903	secretion	biological_process	0.20103	1	5	605	53	10392	FBgn0000611,FBgn0008646,FBgn0035872,FBgn0036414,FBgn0031886	-|-|-|-|-|
GO:0046873	metal ion transmembrane transporter activity	molecular_function	0.20343	1	23	605	322	10392	FBgn0038235,FBgn0029761,FBgn0029762,FBgn0036155,FBgn0052792,FBgn0029672,FBgn0259168,FBgn0001170,FBgn0035866,FBgn0266489,FBgn0036594,FBgn0011286,FBgn0011509,FBgn0015793,FBgn0027581,FBgn0263346,FBgn0029663,FBgn0030897,FBgn0035845,FBgn0034159,FBgn0030869,FBgn0039424,FBgn0022981	-|-|-|-|-|-|-|-|-|-|-|-|-|-|-|-|-|-|-|-|-|-|-|
GO:0005746	mitochondrial respiratory chain	cellular_component	0.20344	1	3	605	27	10392	FBgn0263346,FBgn0011227,FBgn0259683	-|-|-|
GO:0051704	multi-organism process	biological_process	0.20394	1	44	605	653	10392	FBgn0265186,FBgn0003380,FBgn0038242,FBgn0039636,FBgn0036783,FBgn0085313,FBgn0262513,FBgn0086350,FBgn0003882,FBgn0039115,FBgn0038239,FBgn0261802,FBgn0028868,FBgn0266464,FBgn0261673,FBgn0035844,FBgn0034186,FBgn0004638,FBgn0000346,FBgn0001942,FBgn0037249,FBgn0030719,FBgn0033785,FBgn0000121,FBgn0086686,FBgn0024555,FBgn0025836,FBgn0029761,FBgn0041780,FBgn0036929,FBgn0261571,FBgn0030703,FBgn0036159,FBg…	-|-|-|-|-|-|-|-|-|-|-|-|-|-|-|-|-|-|-|-|-|-|-|-|-|-|-|-|-|-|-|-|-|-|-|-|-|-|-|-|-|-|-|-|
GO:0031929	TOR signaling cascade	biological_process	0.2063	1	1	605	4	10392	FBgn0036932	-|
GO:0032006	regulation of TOR signaling cascade	biological_process	0.2063	1	1	605	4	10392	FBgn0036932	-|
GO:0000077	DNA damage checkpoint	biological_process	0.20847	1	1	605	4	10392	FBgn0026417	-|
GO:0030896	checkpoint clamp complex	cellular_component	0.20847	1	1	605	4	10392	FBgn0026417	-|
GO:0031570	DNA integrity checkpoint	biological_process	0.20847	1	1	605	4	10392	FBgn0026417	-|
GO:0007623	circadian rhythm	biological_process	0.20967	1	1	605	4	10392	FBgn0029672	-|
GO:0019028	viral capsid	cellular_component	0.20987	1	18	605	245	10392	FBgn0259110,FBgn0086686,FBgn0031775,FBgn0030477,FBgn0030864,FBgn0037238,FBgn0036591,FBgn0000064,FBgn0038244,FBgn0263258,FBgn0041605,FBgn0000358,FBgn0036576,FBgn0024189,FBgn0035921,FBgn0003326,FBgn0029766,FBgn0034205	-|-|-|-|-|-|-|-|-|-|-|-|-|-|-|-|-|-|
GO:0004143	diacylglycerol kinase activity	molecular_function	0.20993	1	2	605	14	10392	FBgn0020930,FBgn0033853	-|-|
GO:0018205	peptidyl-lysine modification	biological_process	0.21057	1	1	605	4	10392	FBgn0035854	-|
GO:0004332	fructose-bisphosphate aldolase activity	molecular_function	0.21095	1	1	605	4	10392	FBgn0000064	-|
GO:0032266	phosphatidylinositol-3-phosphate binding	molecular_function	0.21096	1	1	605	4	10392	FBgn0037280	-|
GO:1901981	phosphatidylinositol phosphate binding	molecular_function	0.21096	1	1	605	4	10392	FBgn0037280	-|
GO:0018580	nitronate monooxygenase activity	molecular_function	0.21132	1	1	605	4	10392	FBgn0001170	-|
GO:0006383	transcription from RNA polymerase III promoter	biological_process	0.21138	1	1	605	4	10392	FBgn0036775	-|
GO:0008238	exopeptidase activity	molecular_function	0.21149	1	8	605	97	10392	FBgn0039420,FBgn0261697,FBgn0000052,FBgn0261683,FBgn0033774,FBgn0052351,FBgn0033860,FBgn0035915	-|-|-|-|-|-|-|-|
GO:0004417	hydroxyethylthiazole kinase activity	molecular_function	0.21205	1	1	605	4	10392	FBgn0036915	-|
GO:0003880	protein C-terminal carboxyl O-methyltransferase activity	molecular_function	0.21206	1	1	605	4	10392	FBgn0035914	-|
GO:0004671	protein C-terminal S-isoprenylcysteine carboxyl O-methyltransferase activity	molecular_function	0.21206	1	1	605	4	10392	FBgn0035914	-|
GO:0006481	C-terminal protein methylation	biological_process	0.21206	1	1	605	4	10392	FBgn0035914	-|
GO:0018410	C-terminal protein amino acid modification	biological_process	0.21206	1	1	605	4	10392	FBgn0035914	-|
GO:0043687	post-translational protein modification	biological_process	0.21206	1	1	605	4	10392	FBgn0035914	-|
GO:0006904	vesicle docking involved in exocytosis	biological_process	0.21221	1	2	605	15	10392	FBgn0000611,FBgn0031886	-|-|
GO:0016843	amine-lyase activity	molecular_function	0.2137	1	1	605	4	10392	FBgn0041780	-|
GO:0016844	strictosidine synthase activity	molecular_function	0.2137	1	1	605	4	10392	FBgn0041780	-|
GO:0033036	macromolecule localization	biological_process	0.21393	1	34	605	502	10392	FBgn0034168,FBgn0038652,FBgn0034159,FBgn0034197,FBgn0014877,FBgn0261545,FBgn0003326,Novel000095,FBgn0023172,FBgn0001085,FBgn0036774,FBgn0264741,FBgn0035848,FBgn0003093,FBgn0260442,FBgn0030720,FBgn0035853,FBgn0031886,FBgn0087013,FBgn0036920,FBgn0035850,FBgn0004784,FBgn0036928,FBgn0034205,FBgn0036414,FBgn0003091,FBgn0008646,FBgn0038653,FBgn0039117,FBgn0037231,FBgn0025808,FBgn0036612,FBgn0053180,FBg…	-|-|-|-|-|-|-|-|-|-|-|-|-|-|-|-|-|-|-|-|-|-|-|-|-|-|-|-|-|-|-|-|-|-|
GO:0005789	endoplasmic reticulum membrane	cellular_component	0.21401	1	7	605	83	10392	FBgn0036417,FBgn0011286,FBgn0261545,FBgn0036924,FBgn0266429,FBgn0034197,FBgn0039117	-|-|-|-|-|-|-|
GO:0042175	nuclear outer membrane-endoplasmic reticulum membrane network	cellular_component	0.21401	1	7	605	83	10392	FBgn0039117,FBgn0034197,FBgn0266429,FBgn0036924,FBgn0011286,FBgn0036417,FBgn0261545	-|-|-|-|-|-|-|
GO:0009341	beta-galactosidase complex	cellular_component	0.21412	1	1	605	4	10392	FBgn0001089	-|
GO:0010277	chlorophyllide a oxygenase [overall] activity	molecular_function	0.21417	1	1	605	4	10392	FBgn0025836	-|
GO:0010340	carboxyl-O-methyltransferase activity	molecular_function	0.21424	1	3	605	28	10392	FBgn0035914,FBgn0039627,FBgn0038189	-|-|-|
GO:0051998	protein carboxyl O-methyltransferase activity	molecular_function	0.21424	1	3	605	28	10392	FBgn0035914,FBgn0038189,FBgn0039627	-|-|-|
GO:0019362	pyridine nucleotide metabolic process	biological_process	0.21486	1	3	605	28	10392	FBgn0053156,FBgn0033853,FBgn0033769	-|-|-|
GO:0046496	nicotinamide nucleotide metabolic process	biological_process	0.21486	1	3	605	28	10392	FBgn0033769,FBgn0053156,FBgn0033853	-|-|-|
GO:0004857	enzyme inhibitor activity	molecular_function	0.21551	1	11	605	144	10392	FBgn0029761,FBgn0261567,FBgn0033791,FBgn0026721,FBgn0030881,FBgn0038654,FBgn0051313,FBgn0038251,FBgn0038243,FBgn0036612,FBgn0004629	-|-|-|-|-|-|-|-|-|-|-|
GO:0006461	protein complex assembly	biological_process	0.21589	1	9	605	113	10392	FBgn0036929,FBgn0031781,FBgn0051909,FBgn0036593,FBgn0037244,FBgn0264493,FBgn0263606,FBgn0003060,FBgn0003380	-|-|-|-|-|-|-|-|-|
GO:0070271	protein complex biogenesis	biological_process	0.21589	1	9	605	113	10392	FBgn0036929,FBgn0031781,FBgn0051909,FBgn0036593,FBgn0003060,FBgn0264493,FBgn0263606,FBgn0037244,FBgn0003380	-|-|-|-|-|-|-|-|-|
GO:0000279	M phase	biological_process	0.21613	1	1	605	4	10392	FBgn0029667	-|
GO:0022403	cell cycle phase	biological_process	0.21613	1	1	605	4	10392	FBgn0029667	-|
GO:0006368	transcription elongation from RNA polymerase II promoter	biological_process	0.21692	1	1	605	4	10392	FBgn0014037	-|
GO:0008023	transcription elongation factor complex	cellular_component	0.21692	1	1	605	4	10392	FBgn0014037	-|
GO:0005912	adherens junction	cellular_component	0.21746	1	1	605	4	10392	FBgn0260442	-|
GO:0005924	cell-substrate adherens junction	cellular_component	0.21746	1	1	605	4	10392	FBgn0260442	-|
GO:0005925	focal adhesion	cellular_component	0.21746	1	1	605	4	10392	FBgn0260442	-|
GO:0030055	cell-substrate junction	cellular_component	0.21746	1	1	605	4	10392	FBgn0260442	-|
GO:0070161	anchoring junction	cellular_component	0.21746	1	1	605	4	10392	FBgn0260442	-|
GO:0022607	cellular component assembly	biological_process	0.21821	1	18	605	252	10392	FBgn0038659,FBgn0031781,FBgn0003882,FBgn0047199,FBgn0036929,FBgn0003380,FBgn0037244,FBgn0264493,FBgn0263606,FBgn0036593,FBgn0051909,FBgn0000611,FBgn0029664,FBgn0261574,FBgn0003060,FBgn0263782,FBgn0038252,FBgn0004638	-|-|-|-|-|-|-|-|-|-|-|-|-|-|-|-|-|-|
GO:0070469	respiratory chain	cellular_component	0.21847	1	3	605	28	10392	FBgn0263346,FBgn0011227,FBgn0259683	-|-|-|
GO:0033692	cellular polysaccharide biosynthetic process	biological_process	0.2205	1	10	605	127	10392	FBgn0031784,FBgn0039620,FBgn0033769,FBgn0052944,FBgn0004784,FBgn0052220,FBgn0030864,FBgn0003093,FBgn0035848,FBgn0030895	-|-|-|-|-|-|-|-|-|-|
GO:0042765	GPI-anchor transamidase complex	cellular_component	0.22054	1	1	605	4	10392	FBgn0266429	-|
GO:0044767	single-organism developmental process	biological_process	0.2209	1	7	605	84	10392	FBgn0011743,FBgn0265623,FBgn0036591,FBgn0030877,FBgn0264741,FBgn0042201,FBgn0263258	-|-|-|-|-|-|-|
GO:0006260	DNA replication	biological_process	0.22112	1	17	605	236	10392	FBgn0039110,FBgn0000617,FBgn0264907,FBgn0030871,FBgn0086784,FBgn0015270,FBgn0030904,FBgn0041605,FBgn0038252,FBgn0266375,Novel000065,FBgn0039631,FBgn0004512,FBgn0038242,FBgn0005596,FBgn0000576,FBgn0024555	-|-|-|-|-|-|-|-|-|-|-|-|-|-|-|-|-|
GO:0006784	heme a biosynthetic process	biological_process	0.22292	1	1	605	4	10392	FBgn0264493	-|
GO:0046160	heme a metabolic process	biological_process	0.22292	1	1	605	4	10392	FBgn0264493	-|
GO:0042720	mitochondrial inner membrane peptidase complex	cellular_component	0.22342	1	1	605	4	10392	FBgn0260634	-|
GO:0031967	organelle envelope	cellular_component	0.22471	1	17	605	236	10392	FBgn0260794,FBgn0036774,FBgn0035848,FBgn0260634,FBgn0003380,FBgn0038662,FBgn0039120,FBgn0263346,FBgn0011227,FBgn0031886,FBgn0259683,FBgn0039112,FBgn0036920,FBgn0261545,FBgn0003326,FBgn0036928,FBgn0035915	-|-|-|-|-|-|-|-|-|-|-|-|-|-|-|-|-|
GO:0008201	heparin binding	molecular_function	0.22523	1	1	605	4	10392	FBgn0029657	-|
GO:0019012	virion	cellular_component	0.2268	1	31	605	451	10392	FBgn0263396,FBgn0000064,FBgn0260794,FBgn0036591,FBgn0036579,FBgn0263258,FBgn0038244,FBgn0029761,FBgn0037238,FBgn0031775,FBgn0030864,FBgn0030477,FBgn0259110,FBgn0086686,FBgn0262513,FBgn0038237,FBgn0038242,FBgn0051495,FBgn0030706,FBgn0035921,FBgn0024189,FBgn0029766,FBgn0034205,FBgn0003326,FBgn0261802,FBgn0041605,FBgn0038693,FBgn0015270,FBgn0038239,FBgn0036576,FBgn0000358	-|-|-|-|-|-|-|-|-|-|-|-|-|-|-|-|-|-|-|-|-|-|-|-|-|-|-|-|-|-|-|
GO:0071855	neuropeptide receptor binding	molecular_function	0.22682	1	1	605	4	10392	FBgn0037236	-|
GO:0000271	polysaccharide biosynthetic process	biological_process	0.2278	1	10	605	128	10392	FBgn0031784,FBgn0039620,FBgn0033769,FBgn0004784,FBgn0052944,FBgn0052220,FBgn0030864,FBgn0030895,FBgn0035848,FBgn0003093	-|-|-|-|-|-|-|-|-|-|
GO:0043086	negative regulation of catalytic activity	biological_process	0.22829	1	1	605	4	10392	FBgn0029761	-|
GO:0044092	negative regulation of molecular function	biological_process	0.22829	1	1	605	4	10392	FBgn0029761	-|
GO:0051649	establishment of localization in cell	biological_process	0.22836	1	29	605	428	10392	FBgn0036920,FBgn0261545,FBgn0014877,FBgn0035850,Novel000095,FBgn0034205,FBgn0036928,FBgn0004784,FBgn0003326,FBgn0000611,FBgn0039110,FBgn0031886,FBgn0087013,FBgn0039117,FBgn0025808,FBgn0053180,FBgn0036152,FBgn0038662,FBgn0035872,FBgn0030720,FBgn0024555,FBgn0023172,FBgn0264741,FBgn0036414,FBgn0036774,FBgn0003093,FBgn0008646,FBgn0035848,FBgn0003091	-|-|-|-|-|-|-|-|-|-|-|-|-|-|-|-|-|-|-|-|-|-|-|-|-|-|-|-|-|
GO:0072524	pyridine-containing compound metabolic process	biological_process	0.22992	1	3	605	29	10392	FBgn0053156,FBgn0033853,FBgn0033769	-|-|-|
GO:0016010	dystrophin-associated glycoprotein complex	cellular_component	0.23108	1	2	605	15	10392	FBgn0036612,FBgn0030895	-|-|
GO:0006790	sulfur compound metabolic process	biological_process	0.23114	1	5	605	56	10392	FBgn0004512,FBgn0032981,FBgn0036157,FBgn0036915,FBgn0025837	-|-|-|-|-|
GO:0016568	chromatin modification	biological_process	0.23279	1	6	605	69	10392	FBgn0051702,FBgn0030486,FBgn0051703,FBgn0005624,FBgn0051244,FBgn0001170	-|-|-|-|-|-|
GO:0022406	membrane docking	biological_process	0.23373	1	2	605	16	10392	FBgn0031886,FBgn0000611	-|-|
GO:0048278	vesicle docking	biological_process	0.23373	1	2	605	16	10392	FBgn0031886,FBgn0000611	-|-|
GO:0019082	viral protein processing	biological_process	0.23449	1	2	605	16	10392	FBgn0034186,FBgn0085313	-|-|
GO:0006886	intracellular protein transport	biological_process	0.23583	1	22	605	318	10392	FBgn0039117,FBgn0030720,FBgn0053180,FBgn0036152,FBgn0025808,FBgn0023172,FBgn0035848,FBgn0003091,FBgn0003093,FBgn0036774,FBgn0264741,FBgn0036920,FBgn0004784,FBgn0003326,Novel000095,FBgn0034205,FBgn0036928,FBgn0035850,FBgn0014877,FBgn0261545,FBgn0087013,FBgn0031886	-|-|-|-|-|-|-|-|-|-|-|-|-|-|-|-|-|-|-|-|-|-|
GO:0004674	protein serine/threonine kinase activity	molecular_function	0.23594	1	6	605	70	10392	FBgn0266084,FBgn0003169,FBgn0003093,FBgn0261673,FBgn0003091,FBgn0004784	-|-|-|-|-|-|
GO:0007599	hemostasis	biological_process	0.23597	1	3	605	29	10392	FBgn0051909,FBgn0036929,FBgn0036593	-|-|-|
GO:0050817	coagulation	biological_process	0.23597	1	3	605	29	10392	FBgn0036929,FBgn0051909,FBgn0036593	-|-|-|
GO:0050878	regulation of body fluid levels	biological_process	0.23597	1	3	605	29	10392	FBgn0036929,FBgn0051909,FBgn0036593	-|-|-|
GO:0006119	oxidative phosphorylation	biological_process	0.23733	1	3	605	29	10392	FBgn0263346,FBgn0011227,FBgn0259683	-|-|-|
GO:0042773	ATP synthesis coupled electron transport	biological_process	0.23733	1	3	605	29	10392	FBgn0259683,FBgn0263346,FBgn0011227	-|-|-|
GO:0016020	membrane	cellular_component	0.23863	1	192	605	3111	10392	FBgn0039113,FBgn0038247,FBgn0053639,FBgn0085302,FBgn0030869,FBgn0261571,FBgn0034159,FBgn0039419,FBgn0259683,FBgn0030897,FBgn0010350,FBgn0051523,FBgn0028963,FBgn0261574,FBgn0033848,FBgn0011227,FBgn0263346,FBgn0039617,FBgn0002901,FBgn0036773,FBgn0031784,FBgn0264741,FBgn0260794,FBgn0035848,FBgn0023172,FBgn0001085,FBgn0039641,FBgn0051522,FBgn0037408,FBgn0036154,FBgn0035850,FBgn0035915,FBgn0263782,FBg…	-|-|-|-|-|-|-|-|-|-|-|-|-|-|-|-|-|-|-|-|-|-|-|-|-|-|-|-|-|-|-|-|-|-|-|-|-|-|-|-|-|-|-|-|-|-|-|-|-|-|-|-|-|-|-|-|-|-|-|-|-|-|-|-|-|-|-|-|-|-|-|-|-|-|-|-|-|-|-|-|-|-|-|-|-|-|-|-|-|-|-|-|-|-|-|-|-|-|-|-|-|-|-|-|-|-|-|-|-|-|-|-|-|-|-|-|-|-|-|-|-|-|-|-|-|-|-|-
GO:0044764	multi-organism cellular process	biological_process	0.23954	1	25	605	361	10392	FBgn0024555,FBgn0262513,FBgn0085313,FBgn0038242,FBgn0033785,FBgn0000121,FBgn0036929,FBgn0025836,FBgn0029761,FBgn0028868,FBgn0266464,FBgn0261673,FBgn0034186,FBgn0004638,FBgn0038239,FBgn0261802,FBgn0030703,FBgn0261571,FBgn0022724,FBgn0036159,FBgn0051495,FBgn0261574,FBgn0001942,FBgn0039633,FBgn0000346	-|-|-|-|-|-|-|-|-|-|-|-|-|-|-|-|-|-|-|-|-|-|-|-|-|
GO:0006633	fatty acid biosynthetic process	biological_process	0.2403	1	3	605	29	10392	FBgn0001941,FBgn0039113,FBgn0030485	-|-|-|
GO:0006812	cation transport	biological_process	0.24098	1	36	605	539	10392	FBgn0030897,FBgn0263346,FBgn0053061,FBgn0030869,FBgn0034159,FBgn0038246,FBgn0052792,FBgn0259168,FBgn0029761,FBgn0036155,FBgn0011509,FBgn0028668,FBgn0015793,FBgn0022981,FBgn0035915,FBgn0028671,FBgn0039424,FBgn0033856,FBgn0029672,FBgn0037239,FBgn0001170,FBgn0028667,FBgn0035866,FBgn0014869,FBgn0260953,FBgn0261507,FBgn0038235,FBgn0036594,FBgn0011286,FBgn0262513,FBgn0039635,FBgn0039637,FBgn0024184,FBg…	-|-|-|-|-|-|-|-|-|-|-|-|-|-|-|-|-|-|-|-|-|-|-|-|-|-|-|-|-|-|-|-|-|-|-|-|
GO:0003724	RNA helicase activity	molecular_function	0.24121	1	6	605	72	10392	FBgn0000346,FBgn0028684,FBgn0266464,FBgn0028868,FBgn0013809,FBgn0004512	-|-|-|-|-|-|
GO:0033365	protein localization to organelle	biological_process	0.24304	1	7	605	87	10392	FBgn0035848,FBgn0030720,FBgn0003326,FBgn0261545,FBgn0025808,FBgn0031886,FBgn0036920	-|-|-|-|-|-|-|
GO:0016627	oxidoreductase activity, acting on the CH-CH group of donors	molecular_function	0.24409	1	6	605	73	10392	FBgn0035911,FBgn0264493,FBgn0033769,FBgn0035914,FBgn0033774,FBgn0029113	-|-|-|-|-|-|
GO:0046148	pigment biosynthetic process	biological_process	0.24685	1	10	605	133	10392	FBgn0028684,FBgn0036159,FBgn0264493,FBgn0033769,FBgn0028868,FBgn0266464,FBgn0029113,FBgn0030468,FBgn0000346,FBgn0030871	-|-|-|-|-|-|-|-|-|-|
GO:0031301	integral to organelle membrane	cellular_component	0.24963	1	4	605	43	10392	FBgn0034197,FBgn0039117,FBgn0266429,FBgn0260794	-|-|-|-|
GO:0044260	cellular macromolecule metabolic process	biological_process	0.25068	1	188	605	3076	10392	FBgn0017579,FBgn0003091,FBgn0039625,FBgn0034187,FBgn0003882,FBgn0014037,FBgn0052220,FBgn0261113,FBgn0036415,FBgn0260964,FBgn0262508,FBgn0024184,FBgn0083228,FBgn0039636,FBgn0039632,FBgn0051244,FBgn0038188,FBgn0030701,FBgn0037251,FBgn0022981,FBgn0263782,FBgn0041605,FBgn0261802,FBgn0035848,FBgn0001085,FBgn0023172,FBgn0035849,FBgn0033791,FBgn0051702,FBgn0030468,FBgn0030720,FBgn0262607,FBgn0024555,FBg…	-|-|-|-|-|-|-|-|-|-|-|-|-|-|-|-|-|-|-|-|-|-|-|-|-|-|-|-|-|-|-|-|-|-|-|-|-|-|-|-|-|-|-|-|-|-|-|-|-|-|-|-|-|-|-|-|-|-|-|-|-|-|-|-|-|-|-|-|-|-|-|-|-|-|-|-|-|-|-|-|-|-|-|-|-|-|-|-|-|-|-|-|-|-|-|-|-|-|-|-|-|-|-|-|-|-|-|-|-|-|-|-|-|-|-|-|-|-|-|-|-|-|-|-|-|-|-|-
GO:0007033	vacuole organization	biological_process	0.25201	1	1	605	5	10392	FBgn0036932	-|
GO:0048610	cellular process involved in reproduction	biological_process	0.25218	1	8	605	101	10392	FBgn0263219,FBgn0004638,FBgn0265623,FBgn0029761,FBgn0261574,FBgn0263258,FBgn0042201,FBgn0036591	-|-|-|-|-|-|-|-|
GO:0004861	cyclin-dependent protein serine/threonine kinase inhibitor activity	molecular_function	0.25219	1	1	605	5	10392	FBgn0038251	-|
GO:0006811	ion transport	biological_process	0.25303	1	47	605	718	10392	FBgn0036928,FBgn0035915,FBgn0034202,FBgn0022981,FBgn0028671,FBgn0039424,FBgn0038165,FBgn0033856,FBgn0037402,FBgn0036594,FBgn0011286,FBgn0039637,FBgn0053180,FBgn0039635,FBgn0262513,FBgn0024184,FBgn0028692,FBgn0003380,FBgn0037231,FBgn0051835,FBgn0259111,FBgn0001170,FBgn0037239,FBgn0029672,FBgn0036414,FBgn0035866,FBgn0028667,FBgn0014869,FBgn0261507,FBgn0038235,FBgn0260953,FBgn0053061,FBgn0030869,FBg…	-|-|-|-|-|-|-|-|-|-|-|-|-|-|-|-|-|-|-|-|-|-|-|-|-|-|-|-|-|-|-|-|-|-|-|-|-|-|-|-|-|-|-|-|-|-|-|
GO:1901605	alpha-amino acid metabolic process	biological_process	0.2535	1	8	605	103	10392	FBgn0004456,FBgn0035854,FBgn0263607,FBgn0263608,FBgn0261625,FBgn0263594,FBgn0036157,FBgn0033774	-|-|-|-|-|-|-|-|
GO:0044455	mitochondrial membrane part	cellular_component	0.2535	1	9	605	116	10392	FBgn0011227,FBgn0263346,FBgn0260794,FBgn0036774,FBgn0259683,FBgn0260634,FBgn0003380,FBgn0036928,FBgn0035915	-|-|-|-|-|-|-|-|-|
GO:0006555	methionine metabolic process	biological_process	0.25412	1	1	605	5	10392	FBgn0036157	-|
GO:0005515	protein binding	molecular_function	0.25424	1	157	605	2531	10392	FBgn0011286,FBgn0015513,FBgn0263605,FBgn0005624,FBgn0030899,FBgn0051221,FBgn0031888,FBgn0260634,FBgn0085273,FBgn0266084,FBgn0085407,FBgn0037263,FBgn0017418,FBgn0261625,FBgn0004638,FBgn0024189,FBgn0266464,FBgn0037270,FBgn0038165,FBgn0031776,FBgn0000119,FBgn0086613,FBgn0036587,FBgn0030486,FBgn0010453,FBgn0086901,FBgn0051909,FBgn0000411,FBgn0036593,FBgn0030723,FBgn0038237,FBgn0010315,FBgn0036929,FBg…	-|-|-|-|-|-|-|-|-|-|-|-|-|-|-|-|-|-|-|-|-|-|-|-|-|-|-|-|-|-|-|-|-|-|-|-|-|-|-|-|-|-|-|-|-|-|-|-|-|-|-|-|-|-|-|-|-|-|-|-|-|-|-|-|-|-|-|-|-|-|-|-|-|-|-|-|-|-|-|-|-|-|-|-|-|-|-|-|-|-|-|-|-|-|-|-|-|-|-|-|-|-|-|-|-|-|-|-|-|-|-|-|-|-|-|-|-|-|-|-|-|-|-|-|-|-|-|-
GO:0001881	receptor recycling	biological_process	0.25451	1	1	605	5	10392	FBgn0036932	-|
GO:0019354	siroheme biosynthetic process	biological_process	0.25463	1	2	605	17	10392	FBgn0029113,FBgn0033769	-|-|
GO:0043115	precorrin-2 dehydrogenase activity	molecular_function	0.25463	1	2	605	17	10392	FBgn0029113,FBgn0033769	-|-|
GO:0046156	siroheme metabolic process	biological_process	0.25463	1	2	605	17	10392	FBgn0029113,FBgn0033769	-|-|
GO:0017069	snRNA binding	molecular_function	0.25467	1	1	605	5	10392	FBgn0038251	-|
GO:0006575	cellular modified amino acid metabolic process	biological_process	0.255	1	4	605	44	10392	FBgn0035854,FBgn0263594,FBgn0025837,FBgn0262882	-|-|-|-|
GO:0016832	aldehyde-lyase activity	molecular_function	0.25511	1	1	605	5	10392	FBgn0000064	-|
GO:0031123	RNA 3'-end processing	biological_process	0.25561	1	1	605	5	10392	FBgn0037249	-|
GO:0006839	mitochondrial transport	biological_process	0.25571	1	2	605	17	10392	FBgn0038662,FBgn0036920	-|-|
GO:0017038	protein import	biological_process	0.25651	1	4	605	44	10392	FBgn0003326,FBgn0035848,FBgn0031886,FBgn0261545	-|-|-|-|
GO:0004784	superoxide dismutase activity	molecular_function	0.25822	1	1	605	5	10392	FBgn0010213	-|
GO:0016721	oxidoreductase activity, acting on superoxide radicals as acceptor	molecular_function	0.25822	1	1	605	5	10392	FBgn0010213	-|
GO:0050792	regulation of viral process	biological_process	0.25823	1	1	605	5	10392	FBgn0033785	-|
GO:0005885	Arp2/3 protein complex	cellular_component	0.2584	1	1	605	5	10392	FBgn0031781	-|
GO:0010638	positive regulation of organelle organization	biological_process	0.2584	1	1	605	5	10392	FBgn0031781	-|
GO:0030838	positive regulation of actin filament polymerization	biological_process	0.2584	1	1	605	5	10392	FBgn0031781	-|
GO:0031334	positive regulation of protein complex assembly	biological_process	0.2584	1	1	605	5	10392	FBgn0031781	-|
GO:0032273	positive regulation of protein polymerization	biological_process	0.2584	1	1	605	5	10392	FBgn0031781	-|
GO:0034314	Arp2/3 complex-mediated actin nucleation	biological_process	0.2584	1	1	605	5	10392	FBgn0031781	-|
GO:0045010	actin nucleation	biological_process	0.2584	1	1	605	5	10392	FBgn0031781	-|
GO:0051495	positive regulation of cytoskeleton organization	biological_process	0.2584	1	1	605	5	10392	FBgn0031781	-|
GO:0000155	phosphorelay sensor kinase activity	molecular_function	0.25844	1	2	605	17	10392	FBgn0038693,FBgn0036154	-|-|
GO:0016125	sterol metabolic process	biological_process	0.25892	1	1	605	5	10392	FBgn0030895	-|
GO:0032182	small conjugating protein binding	molecular_function	0.25913	1	1	605	5	10392	FBgn0037280	-|
GO:0043130	ubiquitin binding	molecular_function	0.25913	1	1	605	5	10392	FBgn0037280	-|
GO:0009314	response to radiation	biological_process	0.2592	1	1	605	5	10392	FBgn0023172	-|
GO:0009416	response to light stimulus	biological_process	0.2592	1	1	605	5	10392	FBgn0023172	-|
GO:0009628	response to abiotic stimulus	biological_process	0.2592	1	1	605	5	10392	FBgn0023172	-|
GO:0003840	gamma-glutamyltransferase activity	molecular_function	0.25982	1	1	605	5	10392	FBgn0025837	-|
GO:0032775	DNA methylation on adenine	biological_process	0.26032	1	1	605	5	10392	FBgn0037250	-|
GO:0006352	DNA-dependent transcription, initiation	biological_process	0.26069	1	13	605	183	10392	FBgn0031762,FBgn0033855,FBgn0039632,FBgn0051702,FBgn0085407,FBgn0013981,FBgn0030864,FBgn0000617,FBgn0266375,FBgn0024555,FBgn0035921,FBgn0013347,FBgn0051703	-|-|-|-|-|-|-|-|-|-|-|-|-|
GO:0004872	receptor activity	molecular_function	0.26074	1	27	605	398	10392	FBgn0038653,FBgn0266429,FBgn0087012,FBgn0011286,FBgn0035870,FBgn0037399,FBgn0001085,FBgn0035849,FBgn0030715,FBgn0030466,FBgn0036934,FBgn0031770,FBgn0038693,FBgn0039419,FBgn0259683,FBgn0003169,FBgn0263512,FBgn0036154,FBgn0037408,FBgn0053639,FBgn0263782,FBgn0030482,FBgn0034168,FBgn0003248,FBgn0035847,FBgn0028963,FBgn0029768	-|-|-|-|-|-|-|-|-|-|-|-|-|-|-|-|-|-|-|-|-|-|-|-|-|-|-|
GO:0006354	DNA-dependent transcription, elongation	biological_process	0.26099	1	1	605	5	10392	FBgn0014037	-|
GO:0035737	injection of substance in to other organism	biological_process	0.26124	1	1	605	5	10392	FBgn0028963	-|
GO:0035738	envenomation resulting in modification of morphology or physiology of other organism	biological_process	0.26124	1	1	605	5	10392	FBgn0028963	-|
GO:0044559	envenomation resulting in modulation of voltage-gated potassium channel activity in other organism	biological_process	0.26124	1	1	605	5	10392	FBgn0028963	-|
GO:0044560	envenomation resulting in modulation of ion channel activity in other organism	biological_process	0.26124	1	1	605	5	10392	FBgn0028963	-|
GO:0044562	envenomation resulting in negative regulation of voltage-gated potassium channel activity in other organism	biological_process	0.26124	1	1	605	5	10392	FBgn0028963	-|
GO:0044564	envenomation resulting in occlusion of the pore of voltage-gated potassium channel in other organism	biological_process	0.26124	1	1	605	5	10392	FBgn0028963	-|
GO:0006518	peptide metabolic process	biological_process	0.26149	1	3	605	30	10392	FBgn0025837,FBgn0261545,FBgn0036924	-|-|-|
GO:0019058	viral infectious cycle	biological_process	0.26166	1	11	605	150	10392	FBgn0034186,FBgn0004638,FBgn0266464,FBgn0028868,FBgn0085313,FBgn0000121,FBgn0038239,FBgn0038242,FBgn0001942,FBgn0261574,FBgn0000346	-|-|-|-|-|-|-|-|-|-|-|
GO:0005158	insulin receptor binding	molecular_function	0.26327	1	1	605	5	10392	FBgn0260442	-|
GO:0034637	cellular carbohydrate biosynthetic process	biological_process	0.26332	1	10	605	133	10392	FBgn0033769,FBgn0039620,FBgn0031784,FBgn0052220,FBgn0004784,FBgn0052944,FBgn0030864,FBgn0035848,FBgn0030895,FBgn0003093	-|-|-|-|-|-|-|-|-|-|
GO:0005615	extracellular space	cellular_component	0.26338	1	4	605	45	10392	FBgn0038172,FBgn0051909,FBgn0036929,FBgn0036593	-|-|-|-|
GO:0008250	oligosaccharyltransferase complex	cellular_component	0.26347	1	1	605	5	10392	FBgn0036417	-|
GO:0008092	cytoskeletal protein binding	molecular_function	0.26356	1	15	605	207	10392	FBgn0038659,FBgn0000611,FBgn0029664,FBgn0266084,FBgn0263396,FBgn0038248,FBgn0260442,FBgn0038165,FBgn0010315,FBgn0030869,FBgn0014870,FBgn0052791,FBgn0024189,FBgn0267002,FBgn0000308	-|-|-|-|-|-|-|-|-|-|-|-|-|-|-|
GO:0031554	regulation of DNA-dependent transcription, termination	biological_process	0.2642	1	1	605	5	10392	FBgn0004456	-|
GO:0004571	mannosyl-oligosaccharide 1,2-alpha-mannosidase activity	molecular_function	0.26424	1	1	605	5	10392	FBgn0039634	-|
GO:0015924	mannosyl-oligosaccharide mannosidase activity	molecular_function	0.26424	1	1	605	5	10392	FBgn0039634	-|
GO:0008440	inositol-1,4,5-trisphosphate 3-kinase activity	molecular_function	0.26438	1	1	605	5	10392	FBgn0266375	-|
GO:0051766	inositol trisphosphate kinase activity	molecular_function	0.26438	1	1	605	5	10392	FBgn0266375	-|
GO:0004013	adenosylhomocysteinase activity	molecular_function	0.26654	1	1	605	5	10392	FBgn0003149	-|
GO:0016801	hydrolase activity, acting on ether bonds	molecular_function	0.26654	1	1	605	5	10392	FBgn0003149	-|
GO:0016802	trialkylsulfonium hydrolase activity	molecular_function	0.26654	1	1	605	5	10392	FBgn0003149	-|
GO:0004721	phosphoprotein phosphatase activity	molecular_function	0.26699	1	4	605	43	10392	FBgn0039421,FBgn0025742,FBgn0029667,FBgn0039111	-|-|-|-|
GO:0015629	actin cytoskeleton	cellular_component	0.26841	1	4	605	43	10392	FBgn0004028,FBgn0031781,FBgn0003149,FBgn0261545	-|-|-|-|
GO:0016741	transferase activity, transferring one-carbon groups	molecular_function	0.26841	1	14	605	200	10392	FBgn0261697,FBgn0038191,FBgn0261683,FBgn0038188,FBgn0051244,FBgn0039627,FBgn0030486,FBgn0038189,FBgn0262882,FBgn0031777,FBgn0035914,FBgn0030720,FBgn0039639,FBgn0037250	-|-|-|-|-|-|-|-|-|-|-|-|-|-|
GO:0032886	regulation of microtubule-based process	biological_process	0.2687	1	1	605	5	10392	FBgn0266521	-|
GO:0070507	regulation of microtubule cytoskeleton organization	biological_process	0.2687	1	1	605	5	10392	FBgn0266521	-|
GO:0012505	endomembrane system	cellular_component	0.26889	1	13	605	182	10392	FBgn0039641,FBgn0039120,FBgn0035848,FBgn0036417,FBgn0031886,FBgn0034197,FBgn0039117,FBgn0266429,Novel000095,FBgn0036924,FBgn0003326,FBgn0261545,FBgn0011286	-|-|-|-|-|-|-|-|-|-|-|-|-|
GO:0022414	reproductive process	biological_process	0.27062	1	6	605	73	10392	FBgn0042201,FBgn0036591,FBgn0265623,FBgn0030468,FBgn0263258,FBgn0263219	-|-|-|-|-|-|
GO:0043933	macromolecular complex subunit organization	biological_process	0.27065	1	12	605	168	10392	FBgn0036929,FBgn0031781,FBgn0051909,FBgn0038252,FBgn0036593,FBgn0264493,FBgn0037244,FBgn0263606,FBgn0003060,FBgn0004456,FBgn0003380,FBgn0036576	-|-|-|-|-|-|-|-|-|-|-|-|
GO:0050794	regulation of cellular process	biological_process	0.2711	1	124	605	1987	10392	FBgn0037263,FBgn0085407,FBgn0004512,FBgn0266429,FBgn0030899,FBgn0003016,FBgn0262519,FBgn0013809,FBgn0027581,FBgn0086901,FBgn0010453,Novel000042,FBgn0030486,FBgn0050456,FBgn0029768,FBgn0035845,FBgn0030893,FBgn0261570,FBgn0024189,FBgn0263512,FBgn0266375,FBgn0030482,FBgn0004784,FBgn0266464,FBgn0085444,FBgn0003969,FBgn0031781,FBgn0029761,FBgn0030477,FBgn0025574,FBgn0036929,FBgn0029657,FBgn0038244,FBg…	-|-|-|-|-|-|-|-|-|-|-|-|-|-|-|-|-|-|-|-|-|-|-|-|-|-|-|-|-|-|-|-|-|-|-|-|-|-|-|-|-|-|-|-|-|-|-|-|-|-|-|-|-|-|-|-|-|-|-|-|-|-|-|-|-|-|-|-|-|-|-|-|-|-|-|-|-|-|-|-|-|-|-|-|-|-|-|-|-|-|-|-|-|-|-|-|-|-|-|-|-|-|-|-|-|-|-|-|-|-|-|-|-|-|-|-|-|-|-|-|-|-|-|-|
GO:0033179	proton-transporting V-type ATPase, V0 domain	cellular_component	0.27168	1	4	605	46	10392	FBgn0028671,FBgn0261507,FBgn0037231,FBgn0039635	-|-|-|-|
GO:0070588	calcium ion transmembrane transport	biological_process	0.27251	1	1	605	5	10392	FBgn0011286	-|
GO:0009605	response to external stimulus	biological_process	0.27266	1	3	605	31	10392	FBgn0023172,FBgn0031777,FBgn0041780	-|-|-|
GO:0000793	condensed chromosome	cellular_component	0.27351	1	3	605	31	10392	FBgn0030874,FBgn0026417,FBgn0036576	-|-|-|
GO:0006310	DNA recombination	biological_process	0.27414	1	9	605	122	10392	FBgn0025808,FBgn0028868,FBgn0266464,FBgn0030474,FBgn0028684,FBgn0002899,FBgn0030871,Novel000042,FBgn0000346	-|-|-|-|-|-|-|-|-|
GO:0044432	endoplasmic reticulum part	cellular_component	0.27495	1	7	605	90	10392	FBgn0261545,FBgn0011286,FBgn0036417,FBgn0036924,FBgn0266429,FBgn0034197,FBgn0039117	-|-|-|-|-|-|-|
GO:0006732	coenzyme metabolic process	biological_process	0.27509	1	7	605	91	10392	FBgn0033853,FBgn0053156,FBgn0033769,FBgn0263594,FBgn0263782,FBgn0032981,FBgn0262882	-|-|-|-|-|-|-|
GO:0009451	RNA modification	biological_process	0.27519	1	8	605	106	10392	FBgn0025808,FBgn0031777,FBgn0028868,FBgn0036593,FBgn0037250,FBgn0039627,FBgn0038189,FBgn0000346	-|-|-|-|-|-|-|-|
GO:0072686	mitotic spindle	cellular_component	0.27568	1	2	605	17	10392	FBgn0036576,FBgn0030874	-|-|
GO:0032501	multicellular organismal process	biological_process	0.27658	1	26	605	392	10392	FBgn0035872,FBgn0036593,FBgn0051909,FBgn0265623,FBgn0030468,FBgn0035870,FBgn0037399,FBgn0000463,FBgn0003882,FBgn0038244,FBgn0263258,FBgn0039115,FBgn0036591,FBgn0036929,FBgn0264741,FBgn0030715,FBgn0000355,FBgn0000356,FBgn0000358,FBgn0000357,FBgn0263219,FBgn0030482,FBgn0010453,FBgn0028963,FBgn0038167,FBgn0042201	-|-|-|-|-|-|-|-|-|-|-|-|-|-|-|-|-|-|-|-|-|-|-|-|-|-|
GO:0016805	dipeptidase activity	molecular_function	0.27723	1	1	605	5	10392	FBgn0039420	-|
GO:0008168	methyltransferase activity	molecular_function	0.27939	1	13	605	186	10392	FBgn0261683,FBgn0038191,FBgn0261697,FBgn0030486,FBgn0038189,FBgn0039627,FBgn0051244,FBgn0038188,FBgn0030720,FBgn0035914,FBgn0031777,FBgn0037250,FBgn0039639	-|-|-|-|-|-|-|-|-|-|-|-|-|
GO:0016772	transferase activity, transferring phosphorus-containing groups	molecular_function	0.28076	1	53	605	828	10392	FBgn0003169,FBgn0038252,FBgn0038167,FBgn0010350,FBgn0030871,FBgn0039110,FBgn0053156,FBgn0033844,FBgn0003256,FBgn0026749,FBgn0052944,FBgn0000121,FBgn0033773,FBgn0030707,FBgn0031784,FBgn0028684,FBgn0037249,FBgn0259168,FBgn0003093,FBgn0033791,FBgn0036154,Novel000065,FBgn0266375,FBgn0004784,FBgn0261673,FBgn0266464,FBgn0028868,FBgn0038693,FBgn0030893,FBgn0261570,FBgn0037279,FBgn0261697,FBgn0086784,FBg…	-|-|-|-|-|-|-|-|-|-|-|-|-|-|-|-|-|-|-|-|-|-|-|-|-|-|-|-|-|-|-|-|-|-|-|-|-|-|-|-|-|-|-|-|-|-|-|-|-|-|-|-|-|
GO:0046085	adenosine metabolic process	biological_process	0.28607	1	3	605	32	10392	FBgn0000346,FBgn0025808,FBgn0028868	-|-|-|
GO:0070525	threonylcarbamoyladenosine metabolic process	biological_process	0.28607	1	3	605	32	10392	FBgn0000346,FBgn0025808,FBgn0028868	-|-|-|
GO:0070526	threonylcarbamoyladenosine biosynthetic process	biological_process	0.28607	1	3	605	32	10392	FBgn0000346,FBgn0028868,FBgn0025808	-|-|-|
GO:0006401	RNA catabolic process	biological_process	0.28745	1	2	605	17	10392	FBgn0085383,FBgn0085391	-|-|
GO:0006402	mRNA catabolic process	biological_process	0.28745	1	2	605	17	10392	FBgn0085383,FBgn0085391	-|-|
GO:0035556	intracellular signal transduction	biological_process	0.2877	1	28	605	420	10392	FBgn0024556,FBgn0003093,FBgn0035866,FBgn0031762,FBgn0003091,FBgn0003969,FBgn0023172,FBgn0025836,FBgn0037263,FBgn0262519,FBgn0034158,FBgn0011509,FBgn0053180,FBgn0086686,FBgn0015793,FBgn0038653,FBgn0003392,FBgn0035916,FBgn0050456,FBgn0266521,FBgn0004852,FBgn0020930,FBgn0036932,FBgn0000346,FBgn0034194,FBgn0004784,FBgn0030869,FBgn0261570	-|-|-|-|-|-|-|-|-|-|-|-|-|-|-|-|-|-|-|-|-|-|-|-|-|-|-|-|
GO:0005787	signal peptidase complex	cellular_component	0.28811	1	2	605	18	10392	FBgn0261545,FBgn0036924	-|-|
GO:0006465	signal peptide processing	biological_process	0.28811	1	2	605	18	10392	FBgn0036924,FBgn0261545	-|-|
GO:0042440	pigment metabolic process	biological_process	0.28994	1	10	605	139	10392	FBgn0030871,FBgn0000346,FBgn0030468,FBgn0029113,FBgn0266464,FBgn0028868,FBgn0036159,FBgn0264493,FBgn0033769,FBgn0028684	-|-|-|-|-|-|-|-|-|-|
GO:0007156	homophilic cell adhesion	biological_process	0.29063	1	2	605	17	10392	FBgn0261574,FBgn0038247	-|-|
GO:0097367	carbohydrate derivative binding	molecular_function	0.29073	1	9	605	124	10392	FBgn0035845,Novel000079,FBgn0035844,FBgn0026077,FBgn0040687,Novel000078,FBgn0040950,FBgn0029657,FBgn0037236	-|-|-|-|-|-|-|-|-|
GO:0004221	ubiquitin thiolesterase activity	molecular_function	0.29112	1	3	605	32	10392	FBgn0259738,FBgn0029763,FBgn0000611	-|-|-|
GO:0031975	envelope	cellular_component	0.29147	1	17	605	248	10392	FBgn0035848,FBgn0260794,FBgn0036774,FBgn0003380,FBgn0260634,FBgn0038662,FBgn0263346,FBgn0011227,FBgn0039120,FBgn0031886,FBgn0036920,FBgn0259683,FBgn0039112,FBgn0035915,FBgn0036928,FBgn0003326,FBgn0261545	-|-|-|-|-|-|-|-|-|-|-|-|-|-|-|-|-|
GO:0016628	oxidoreductase activity, acting on the CH-CH group of donors, NAD or NADP as acceptor	molecular_function	0.29207	1	3	605	33	10392	FBgn0033774,FBgn0029113,FBgn0033769	-|-|-|
GO:0044264	cellular polysaccharide metabolic process	biological_process	0.29281	1	10	605	137	10392	FBgn0003093,FBgn0030895,FBgn0035848,FBgn0030864,FBgn0052220,FBgn0052944,FBgn0004784,FBgn0033769,FBgn0031784,FBgn0039620	-|-|-|-|-|-|-|-|-|-|
GO:0015740	C4-dicarboxylate transport	biological_process	0.29481	1	1	605	6	10392	FBgn0036928	-|
GO:0005741	mitochondrial outer membrane	cellular_component	0.29556	1	3	605	33	10392	FBgn0036928,FBgn0036774,FBgn0036920	-|-|-|
GO:0031968	organelle outer membrane	cellular_component	0.29556	1	3	605	33	10392	FBgn0036920,FBgn0036928,FBgn0036774	-|-|-|
GO:0048511	rhythmic process	biological_process	0.29591	1	1	605	6	10392	FBgn0029672	-|
GO:0005783	endoplasmic reticulum	cellular_component	0.2962	1	12	605	171	10392	FBgn0036417,FBgn0264741,FBgn0024555,FBgn0036152,FBgn0036924,FBgn0011286,FBgn0261545,FBgn0014877,FBgn0034197,FBgn0039117,FBgn0264493,FBgn0266429	-|-|-|-|-|-|-|-|-|-|-|-|
GO:0000778	condensed nuclear chromosome kinetochore	cellular_component	0.29766	1	2	605	18	10392	FBgn0036576,FBgn0030874	-|-|
GO:0000780	condensed nuclear chromosome, centromeric region	cellular_component	0.29766	1	2	605	18	10392	FBgn0036576,FBgn0030874	-|-|
GO:0000940	condensed chromosome outer kinetochore	cellular_component	0.29766	1	2	605	18	10392	FBgn0030874,FBgn0036576	-|-|
GO:0000942	condensed nuclear chromosome outer kinetochore	cellular_component	0.29766	1	2	605	18	10392	FBgn0030874,FBgn0036576	-|-|
GO:0042729	DASH complex	cellular_component	0.29766	1	2	605	18	10392	FBgn0036576,FBgn0030874	-|-|
GO:0031047	gene silencing by RNA	biological_process	0.29955	1	1	605	6	10392	FBgn0000411	-|
GO:0008064	regulation of actin polymerization or depolymerization	biological_process	0.30003	1	1	605	6	10392	FBgn0031781	-|
GO:0008154	actin polymerization or depolymerization	biological_process	0.30003	1	1	605	6	10392	FBgn0031781	-|
GO:0030041	actin filament polymerization	biological_process	0.30003	1	1	605	6	10392	FBgn0031781	-|
GO:0030832	regulation of actin filament length	biological_process	0.30003	1	1	605	6	10392	FBgn0031781	-|
GO:0030833	regulation of actin filament polymerization	biological_process	0.30003	1	1	605	6	10392	FBgn0031781	-|
GO:0032271	regulation of protein polymerization	biological_process	0.30003	1	1	605	6	10392	FBgn0031781	-|
GO:0032535	regulation of cellular component size	biological_process	0.30003	1	1	605	6	10392	FBgn0031781	-|
GO:0032956	regulation of actin cytoskeleton organization	biological_process	0.30003	1	1	605	6	10392	FBgn0031781	-|
GO:0032970	regulation of actin filament-based process	biological_process	0.30003	1	1	605	6	10392	FBgn0031781	-|
GO:0043254	regulation of protein complex assembly	biological_process	0.30003	1	1	605	6	10392	FBgn0031781	-|
GO:0004565	beta-galactosidase activity	molecular_function	0.30056	1	1	605	6	10392	FBgn0001089	-|
GO:0015925	galactosidase activity	molecular_function	0.30056	1	1	605	6	10392	FBgn0001089	-|
GO:0009067	aspartate family amino acid biosynthetic process	biological_process	0.3007	1	2	605	19	10392	FBgn0033774,FBgn0004456	-|-|
GO:0048038	quinone binding	molecular_function	0.30263	1	1	605	6	10392	FBgn0001942	-|
GO:0015081	sodium ion transmembrane transporter activity	molecular_function	0.30324	1	7	605	93	10392	FBgn0022981,FBgn0029672,FBgn0052792,FBgn0029663,FBgn0030897,FBgn0029762,FBgn0039424	-|-|-|-|-|-|-|
GO:0031300	intrinsic to organelle membrane	cellular_component	0.30351	1	4	605	47	10392	FBgn0260794,FBgn0039117,FBgn0034197,FBgn0266429	-|-|-|-|
GO:0044445	cytosolic part	cellular_component	0.30389	1	3	605	34	10392	FBgn0031776,FBgn0037231,FBgn0036918	-|-|-|
GO:0006887	exocytosis	biological_process	0.30476	1	2	605	19	10392	FBgn0000611,FBgn0031886	-|-|
GO:0016044	cellular membrane organization	biological_process	0.30514	1	2	605	19	10392	FBgn0038652,FBgn0034168	-|-|
GO:0030089	phycobilisome	cellular_component	0.30548	1	1	605	6	10392	FBgn0023172	-|
GO:0009007	site-specific DNA-methyltransferase (adenine-specific) activity	molecular_function	0.30574	1	1	605	6	10392	FBgn0037250	-|
GO:0009008	DNA-methyltransferase activity	molecular_function	0.30574	1	1	605	6	10392	FBgn0037250	-|
GO:0046907	intracellular transport	biological_process	0.30578	1	25	605	382	10392	FBgn0025808,FBgn0030720,FBgn0024555,FBgn0036152,FBgn0053180,FBgn0038662,FBgn0039117,FBgn0036774,FBgn0264741,FBgn0035848,FBgn0003091,FBgn0003093,FBgn0023172,FBgn0035850,FBgn0261545,FBgn0014877,FBgn0004784,FBgn0003326,Novel000095,FBgn0036928,FBgn0034205,FBgn0036920,FBgn0031886,FBgn0087013,FBgn0039110	-|-|-|-|-|-|-|-|-|-|-|-|-|-|-|-|-|-|-|-|-|-|-|-|-|
GO:0030259	lipid glycosylation	biological_process	0.30584	1	3	605	34	10392	FBgn0039639,FBgn0026754,FBgn0031887	-|-|-|
GO:0010563	negative regulation of phosphorus metabolic process	biological_process	0.30639	1	1	605	6	10392	FBgn0029761	-|
GO:0045936	negative regulation of phosphate metabolic process	biological_process	0.30639	1	1	605	6	10392	FBgn0029761	-|
GO:0072330	monocarboxylic acid biosynthetic process	biological_process	0.30643	1	3	605	33	10392	FBgn0001941,FBgn0030485,FBgn0039113	-|-|-|
GO:0043170	macromolecule metabolic process	biological_process	0.30673	1	229	605	3814	10392	FBgn0052791,FBgn0262519,FBgn0013809,FBgn0025808,FBgn0037231,FBgn0036918,FBgn0005596,FBgn0030474,FBgn0050350,FBgn0263606,FBgn0266429,FBgn0033769,FBgn0030872,FBgn0039631,FBgn0039622,FBgn0004512,FBgn0034182,FBgn0040074,FBgn0040743,FBgn0040950,FBgn0085444,FBgn0030704,FBgn0004784,FBgn0033321,FBgn0030482,FBgn0035844,FBgn0261570,FBgn0027570,FBgn0026741,FBgn0035845,FBgn0085383,FBgn0002899,FBgn0038234,Nov…	-|-|-|-|-|-|-|-|-|-|-|-|-|-|-|-|-|-|-|-|-|-|-|-|-|-|-|-|-|-|-|-|-|-|-|-|-|-|-|-|-|-|-|-|-|-|-|-|-|-|-|-|-|-|-|-|-|-|-|-|-|-|-|-|-|-|-|-|-|-|-|-|-|-|-|-|-|-|-|-|-|-|-|-|-|-|-|-|-|-|-|-|-|-|-|-|-|-|-|-|-|-|-|-|-|-|-|-|-|-|-|-|-|-|-|-|-|-|-|-|-|-|-|-|-|-|-|-
GO:0015672	monovalent inorganic cation transport	biological_process	0.30701	1	20	605	298	10392	FBgn0030897,FBgn0263346,FBgn0022981,FBgn0035915,FBgn0053061,FBgn0039424,FBgn0033856,FBgn0028671,FBgn0028667,FBgn0014869,FBgn0029672,FBgn0052792,FBgn0029761,FBgn0261507,FBgn0262513,FBgn0039635,FBgn0028668,FBgn0037231,FBgn0003380,FBgn0024184	-|-|-|-|-|-|-|-|-|-|-|-|-|-|-|-|-|-|-|-|
GO:0006730	one-carbon metabolic process	biological_process	0.30747	1	1	605	6	10392	FBgn0003149	-|
GO:0007218	neuropeptide signaling pathway	biological_process	0.30808	1	3	605	33	10392	FBgn0030466,FBgn0038244,FBgn0261571	-|-|-|
GO:0015077	monovalent inorganic cation transmembrane transporter activity	molecular_function	0.30848	1	23	605	347	10392	FBgn0035915,FBgn0022981,FBgn0261566,FBgn0028671,FBgn0039424,FBgn0038246,FBgn0030897,FBgn0029663,FBgn0263346,FBgn0028668,FBgn0264903,FBgn0039635,FBgn0262513,FBgn0264493,FBgn0037231,FBgn0003380,FBgn0052792,FBgn0029672,FBgn0014869,FBgn0028667,FBgn0029761,FBgn0261507,FBgn0029762	-|-|-|-|-|-|-|-|-|-|-|-|-|-|-|-|-|-|-|-|-|-|-|
GO:0016651	oxidoreductase activity, acting on NAD(P)H	molecular_function	0.30852	1	6	605	78	10392	FBgn0031771,FBgn0031894,FBgn0003093,FBgn0003091,FBgn0261673,FBgn0023172	-|-|-|-|-|-|
GO:0044255	cellular lipid metabolic process	biological_process	0.3086	1	24	605	366	10392	FBgn0039639,FBgn0266429,FBgn0033769,FBgn0016672,FBgn0031784,FBgn0033844,FBgn0011286,FBgn0052220,FBgn0002901,FBgn0052944,FBgn0031887,FBgn0030465,FBgn0031775,FBgn0030864,FBgn0001941,FBgn0003093,FBgn0030895,FBgn0037279,FBgn0034184,FBgn0039113,FBgn0004784,FBgn0039632,FBgn0030485,FBgn0026754	-|-|-|-|-|-|-|-|-|-|-|-|-|-|-|-|-|-|-|-|-|-|-|-|
GO:0034645	cellular macromolecule biosynthetic process	biological_process	0.30903	1	121	605	1974	10392	FBgn0028737,FBgn0036160,FBgn0013981,FBgn0263346,FBgn0029664,FBgn0030871,FBgn0026058,FBgn0259683,FBgn0033770,FBgn0038166,FBgn0035848,FBgn0031762,FBgn0003093,FBgn0035849,FBgn0051702,FBgn0037262,FBgn0003975,FBgn0023172,FBgn0024555,FBgn0262607,FBgn0052944,FBgn0041588,FBgn0013347,FBgn0031784,FBgn0028684,FBgn0030719,FBgn0086784,FBgn0039632,FBgn0000346,FBgn0051244,FBgn0030710,FBgn0022981,FBgn0028868,FBg…	-|-|-|-|-|-|-|-|-|-|-|-|-|-|-|-|-|-|-|-|-|-|-|-|-|-|-|-|-|-|-|-|-|-|-|-|-|-|-|-|-|-|-|-|-|-|-|-|-|-|-|-|-|-|-|-|-|-|-|-|-|-|-|-|-|-|-|-|-|-|-|-|-|-|-|-|-|-|-|-|-|-|-|-|-|-|-|-|-|-|-|-|-|-|-|-|-|-|-|-|-|-|-|-|-|-|-|-|-|-|-|-|-|-|-|-|-|-|-|-|-|
GO:0008653	lipopolysaccharide metabolic process	biological_process	0.3094	1	7	605	92	10392	FBgn0052220,FBgn0030895,FBgn0004784,FBgn0052944,FBgn0003093,FBgn0030864,FBgn0031784	-|-|-|-|-|-|-|
GO:0009103	lipopolysaccharide biosynthetic process	biological_process	0.3094	1	7	605	92	10392	FBgn0031784,FBgn0030864,FBgn0030895,FBgn0004784,FBgn0052944,FBgn0003093,FBgn0052220	-|-|-|-|-|-|-|
GO:0005853	eukaryotic translation elongation factor 1 complex	cellular_component	0.31125	1	1	605	6	10392	FBgn0028737	-|
GO:0001932	regulation of protein phosphorylation	biological_process	0.31135	1	1	605	6	10392	FBgn0029761	-|
GO:0031399	regulation of protein modification process	biological_process	0.31135	1	1	605	6	10392	FBgn0029761	-|
GO:0043549	regulation of kinase activity	biological_process	0.31135	1	1	605	6	10392	FBgn0029761	-|
GO:0045859	regulation of protein kinase activity	biological_process	0.31135	1	1	605	6	10392	FBgn0029761	-|
GO:0008519	ammonium transmembrane transporter activity	molecular_function	0.31238	1	1	605	6	10392	FBgn0024184	-|
GO:0015101	organic cation transmembrane transporter activity	molecular_function	0.31238	1	1	605	6	10392	FBgn0024184	-|
GO:0015696	ammonium transport	biological_process	0.31238	1	1	605	6	10392	FBgn0024184	-|
GO:0001664	G-protein coupled receptor binding	molecular_function	0.31262	1	1	605	6	10392	FBgn0037236	-|
GO:0006733	oxidoreduction coenzyme metabolic process	biological_process	0.31432	1	3	605	34	10392	FBgn0033769,FBgn0053156,FBgn0033853	-|-|-|
GO:0009108	coenzyme biosynthetic process	biological_process	0.31465	1	5	605	64	10392	FBgn0032981,FBgn0262882,FBgn0033853,FBgn0053156,FBgn0263594	-|-|-|-|-|
GO:0005539	glycosaminoglycan binding	molecular_function	0.31516	1	1	605	6	10392	FBgn0029657	-|
GO:0050789	regulation of biological process	biological_process	0.31521	1	126	605	2041	10392	FBgn0035845,FBgn0261570,FBgn0030893,FBgn0263512,FBgn0024189,FBgn0266464,FBgn0085444,FBgn0266375,FBgn0030482,FBgn0004784,Novel000042,FBgn0010453,FBgn0030486,FBgn0086901,FBgn0050456,FBgn0029768,FBgn0003016,FBgn0266429,FBgn0030899,FBgn0262519,FBgn0013809,FBgn0027581,FBgn0085407,FBgn0037263,FBgn0004512,FBgn0031770,FBgn0036916,FBgn0261545,FBgn0035921,FBgn0000617,FBgn0000611,FBgn0051559,FBgn0033855,FBg…	-|-|-|-|-|-|-|-|-|-|-|-|-|-|-|-|-|-|-|-|-|-|-|-|-|-|-|-|-|-|-|-|-|-|-|-|-|-|-|-|-|-|-|-|-|-|-|-|-|-|-|-|-|-|-|-|-|-|-|-|-|-|-|-|-|-|-|-|-|-|-|-|-|-|-|-|-|-|-|-|-|-|-|-|-|-|-|-|-|-|-|-|-|-|-|-|-|-|-|-|-|-|-|-|-|-|-|-|-|-|-|-|-|-|-|-|-|-|-|-|-|-|-|-|-|-|
GO:0003755	peptidyl-prolyl cis-trans isomerase activity	molecular_function	0.31542	1	2	605	20	10392	FBgn0050350,FBgn0036415	-|-|
GO:0016859	cis-trans isomerase activity	molecular_function	0.31542	1	2	605	20	10392	FBgn0050350,FBgn0036415	-|-|
GO:0031090	organelle membrane	cellular_component	0.3159	1	22	605	333	10392	FBgn0000463,FBgn0039641,FBgn0260794,FBgn0036774,FBgn0266429,FBgn0260634,FBgn0039117,FBgn0003380,FBgn0011286,FBgn0038662,FBgn0036932,FBgn0011227,FBgn0263346,FBgn0036417,FBgn0034197,FBgn0259683,FBgn0036920,FBgn0261545,FBgn0036928,Novel000095,FBgn0036924,FBgn0035915	-|-|-|-|-|-|-|-|-|-|-|-|-|-|-|-|-|-|-|-|-|-|
GO:0032269	negative regulation of cellular protein metabolic process	biological_process	0.31626	1	1	605	6	10392	FBgn0029761	-|
GO:0051248	negative regulation of protein metabolic process	biological_process	0.31626	1	1	605	6	10392	FBgn0029761	-|
GO:0031304	intrinsic to mitochondrial inner membrane	cellular_component	0.31651	1	1	605	6	10392	FBgn0260794	-|
GO:0031305	integral to mitochondrial inner membrane	cellular_component	0.31651	1	1	605	6	10392	FBgn0260794	-|
GO:0032592	integral to mitochondrial membrane	cellular_component	0.31651	1	1	605	6	10392	FBgn0260794	-|
GO:0005829	cytosol	cellular_component	0.31973	1	3	605	35	10392	FBgn0031776,FBgn0037231,FBgn0036918	-|-|-|
GO:0008237	metallopeptidase activity	molecular_function	0.31998	1	11	605	157	10392	FBgn0037230,FBgn0265140,FBgn0036416,FBgn0033774,FBgn0039640,FBgn0036153,FBgn0263983,FBgn0029769,FBgn0259110,FBgn0027570,FBgn0264493	-|-|-|-|-|-|-|-|-|-|-|
GO:0004016	adenylate cyclase activity	molecular_function	0.32037	1	1	605	6	10392	FBgn0004852	-|
GO:0030908	protein splicing	biological_process	0.32097	1	1	605	6	10392	FBgn0085391	-|
GO:0065007	biological regulation	biological_process	0.32156	1	132	605	2144	10392	FBgn0053180,FBgn0036612,FBgn0261113,FBgn0024184,FBgn0083228,FBgn0039636,FBgn0003091,FBgn0039625,FBgn0003882,FBgn0022981,FBgn0263782,FBgn0037408,FBgn0036154,FBgn0029662,FBgn0038693,FBgn0041605,FBgn0020930,FBgn0039632,FBgn0033853,FBgn0051244,FBgn0024555,FBgn0264741,FBgn0035849,FBgn0038659,FBgn0025836,FBgn0001085,FBgn0023172,FBgn0036926,FBgn0053639,FBgn0039419,FBgn0037250,FBgn0261571,FBgn0030869,FBg…	-|-|-|-|-|-|-|-|-|-|-|-|-|-|-|-|-|-|-|-|-|-|-|-|-|-|-|-|-|-|-|-|-|-|-|-|-|-|-|-|-|-|-|-|-|-|-|-|-|-|-|-|-|-|-|-|-|-|-|-|-|-|-|-|-|-|-|-|-|-|-|-|-|-|-|-|-|-|-|-|-|-|-|-|-|-|-|-|-|-|-|-|-|-|-|-|-|-|-|-|-|-|-|-|-|-|-|-|-|-|-|-|-|-|-|-|-|-|-|-|-|-|-|-|-|-|-|-
GO:0004866	endopeptidase inhibitor activity	molecular_function	0.32275	1	6	605	81	10392	FBgn0038654,FBgn0051313,FBgn0038243,FBgn0026721,FBgn0004629,FBgn0036612	-|-|-|-|-|-|
GO:0061135	endopeptidase regulator activity	molecular_function	0.32275	1	6	605	81	10392	FBgn0038654,FBgn0051313,FBgn0038243,FBgn0026721,FBgn0004629,FBgn0036612	-|-|-|-|-|-|
GO:0015035	protein disulfide oxidoreductase activity	molecular_function	0.32294	1	3	605	35	10392	FBgn0036579,FBgn0051559,FBgn0029662	-|-|-|
GO:0015036	disulfide oxidoreductase activity	molecular_function	0.32294	1	3	605	35	10392	FBgn0051559,FBgn0029662,FBgn0036579	-|-|-|
GO:0005576	extracellular region	cellular_component	0.32593	1	49	605	776	10392	FBgn0029664,FBgn0036416,FBgn0261574,FBgn0037236,FBgn0042201,FBgn0030897,FBgn0038167,FBgn0036576,FBgn0034197,FBgn0263219,FBgn0022724,FBgn0034194,Novel000078,FBgn0029762,FBgn0033791,FBgn0036926,FBgn0030881,FBgn0041780,FBgn0263258,FBgn0036591,FBgn0036929,FBgn0037249,FBgn0260442,FBgn0086686,FBgn0036593,FBgn0013303,FBgn0024555,FBgn0026077,FBgn0265623,FBgn0051909,FBgn0010453,FBgn0085383,FBgn0020930,FBg…	-|-|-|-|-|-|-|-|-|-|-|-|-|-|-|-|-|-|-|-|-|-|-|-|-|-|-|-|-|-|-|-|-|-|-|-|-|-|-|-|-|-|-|-|-|-|-|-|-|
GO:0032403	protein complex binding	molecular_function	0.32955	1	4	605	50	10392	FBgn0260442,FBgn0035866,FBgn0004512,FBgn0011509	-|-|-|-|
GO:0043603	cellular amide metabolic process	biological_process	0.33053	1	4	605	49	10392	FBgn0025837,FBgn0261545,FBgn0262882,FBgn0036924	-|-|-|-|
GO:0005976	polysaccharide metabolic process	biological_process	0.33166	1	10	605	142	10392	FBgn0030864,FBgn0035848,FBgn0030895,FBgn0003093,FBgn0033769,FBgn0039620,FBgn0031784,FBgn0052220,FBgn0004784,FBgn0052944	-|-|-|-|-|-|-|-|-|-|
GO:0015075	ion transmembrane transporter activity	molecular_function	0.33269	1	50	605	792	10392	FBgn0030869,FBgn0034159,FBgn0038246,FBgn0259683,FBgn0053061,FBgn0261566,FBgn0263346,FBgn0030897,FBgn0010240,FBgn0264493,FBgn0030707,FBgn0028668,FBgn0011509,FBgn0015793,FBgn0029761,FBgn0029762,FBgn0036155,FBgn0039641,FBgn0259168,FBgn0052792,FBgn0028671,FBgn0035845,FBgn0038165,FBgn0039424,FBgn0036928,FBgn0035915,FBgn0022981,FBgn0029663,FBgn0024184,FBgn0003380,FBgn0037231,FBgn0266489,FBgn0032988,FBg…	-|-|-|-|-|-|-|-|-|-|-|-|-|-|-|-|-|-|-|-|-|-|-|-|-|-|-|-|-|-|-|-|-|-|-|-|-|-|-|-|-|-|-|-|-|-|-|-|-|-|
GO:0005737	cytoplasm	cellular_component	0.33324	1	81	605	1322	10392	FBgn0263346,FBgn0011227,FBgn0028737,FBgn0037250,FBgn0034159,FBgn0039112,FBgn0259683,FBgn0014877,FBgn0035914,FBgn0023172,FBgn0039641,FBgn0038659,FBgn0260794,FBgn0036774,FBgn0264741,FBgn0264343,FBgn0264493,FBgn0030719,FBgn0011509,FBgn0030720,FBgn0024555,FBgn0038662,FBgn0038188,FBgn0036932,FBgn0038189,FBgn0085391,FBgn0031886,FBgn0087013,FBgn0261802,FBgn0038251,FBgn0036920,FBgn0033856,FBgn0035915,FBg…	-|-|-|-|-|-|-|-|-|-|-|-|-|-|-|-|-|-|-|-|-|-|-|-|-|-|-|-|-|-|-|-|-|-|-|-|-|-|-|-|-|-|-|-|-|-|-|-|-|-|-|-|-|-|-|-|-|-|-|-|-|-|-|-|-|-|-|-|-|-|-|-|-|-|-|-|-|-|-|-|-|
GO:0070008	serine-type exopeptidase activity	molecular_function	0.33331	1	2	605	20	10392	FBgn0261683,FBgn0261697	-|-|
GO:0048609	multicellular organismal reproductive process	biological_process	0.33398	1	4	605	49	10392	FBgn0042201,FBgn0265623,FBgn0036591,FBgn0263258	-|-|-|-|
GO:0004045	aminoacyl-tRNA hydrolase activity	molecular_function	0.33414	1	1	605	7	10392	FBgn0262839	-|
GO:0006553	lysine metabolic process	biological_process	0.33629	1	1	605	7	10392	FBgn0033774	-|
GO:0008839	4-hydroxy-tetrahydrodipicolinate reductase	molecular_function	0.33629	1	1	605	7	10392	FBgn0033774	-|
GO:0009085	lysine biosynthetic process	biological_process	0.33629	1	1	605	7	10392	FBgn0033774	-|
GO:0009089	lysine biosynthetic process via diaminopimelate	biological_process	0.33629	1	1	605	7	10392	FBgn0033774	-|
GO:0046451	diaminopimelate metabolic process	biological_process	0.33629	1	1	605	7	10392	FBgn0033774	-|
GO:1901135	carbohydrate derivative metabolic process	biological_process	0.33756	1	41	605	651	10392	FBgn0030864,FBgn0040950,FBgn0030895,FBgn0003380,Novel000079,FBgn0005596,FBgn0035916,FBgn0038653,FBgn0083228,FBgn0266429,FBgn0043575,FBgn0036612,FBgn0031765,FBgn0011286,FBgn0259738,FBgn0052220,FBgn0025808,FBgn0000346,FBgn0039120,FBgn0033856,FBgn0043576,FBgn0033327,FBgn0035845,FBgn0263782,FBgn0028868,FBgn0035915,FBgn0004784,FBgn0035844,FBgn0040687,FBgn0003093,FBgn0031784,FBgn0086686,FBgn0052944,FBg…	-|-|-|-|-|-|-|-|-|-|-|-|-|-|-|-|-|-|-|-|-|-|-|-|-|-|-|-|-|-|-|-|-|-|-|-|-|-|-|-|-|
GO:0048869	cellular developmental process	biological_process	0.3382	1	6	605	80	10392	FBgn0011743,FBgn0263258,FBgn0042201,FBgn0036591,FBgn0265623,FBgn0030877	-|-|-|-|-|-|
GO:0007015	actin filament organization	biological_process	0.33908	1	1	605	7	10392	FBgn0031781	-|
GO:0004553	hydrolase activity, hydrolyzing O-glycosyl compounds	molecular_function	0.33934	1	13	605	191	10392	FBgn0038241,FBgn0046999,FBgn0034162,FBgn0000463,FBgn0039634,FBgn0001089,FBgn0033856,FBgn0261434,FBgn0260442,FBgn0083228,FBgn0030478,FBgn0025827,FBgn0034165	-|-|-|-|-|-|-|-|-|-|-|-|-|
GO:0018149	peptide cross-linking	biological_process	0.33959	1	1	605	7	10392	FBgn0034159	-|
GO:0006520	cellular amino acid metabolic process	biological_process	0.33965	1	16	605	242	10392	FBgn0025837,FBgn0010591,FBgn0263607,FBgn0261625,FBgn0036927,FBgn0265089,FBgn0087039,FBgn0029664,FBgn0036157,FBgn0030478,FBgn0035854,FBgn0004456,FBgn0263608,FBgn0262882,FBgn0263594,FBgn0033774	-|-|-|-|-|-|-|-|-|-|-|-|-|-|-|-|
GO:0000777	condensed chromosome kinetochore	cellular_component	0.34	1	2	605	20	10392	FBgn0036576,FBgn0030874	-|-|
GO:0000779	condensed chromosome, centromeric region	cellular_component	0.34	1	2	605	20	10392	FBgn0036576,FBgn0030874	-|-|
GO:0051707	response to other organism	biological_process	0.34064	1	7	605	96	10392	FBgn0039636,FBgn0037249,FBgn0034186,FBgn0035844,FBgn0037410,FBgn0041780,FBgn0030868	-|-|-|-|-|-|-|
GO:0006848	pyruvate transport	biological_process	0.34078	1	1	605	7	10392	FBgn0038662	-|
GO:0006850	mitochondrial pyruvate transport	biological_process	0.34078	1	1	605	7	10392	FBgn0038662	-|
GO:0003870	5-aminolevulinate synthase activity	molecular_function	0.34089	1	1	605	7	10392	FBgn0030466	-|
GO:0016749	N-succinyltransferase activity	molecular_function	0.34089	1	1	605	7	10392	FBgn0030466	-|
GO:0016646	oxidoreductase activity, acting on the CH-NH group of donors, NAD or NADP as acceptor	molecular_function	0.34152	1	2	605	21	10392	FBgn0036157,FBgn0030724	-|-|
GO:0071555	cell wall organization	biological_process	0.34302	1	1	605	7	10392	FBgn0038693	-|
GO:0042221	response to chemical stimulus	biological_process	0.34349	1	7	605	96	10392	FBgn0035849,FBgn0030703,FBgn0036932,FBgn0039631,FBgn0028868,FBgn0030482,FBgn0035870	-|-|-|-|-|-|-|
GO:0010035	response to inorganic substance	biological_process	0.3438	1	1	605	7	10392	FBgn0028868	-|
GO:0010038	response to metal ion	biological_process	0.3438	1	1	605	7	10392	FBgn0028868	-|
GO:0045735	nutrient reservoir activity	molecular_function	0.34472	1	1	605	7	10392	FBgn0052351	-|
GO:0043903	regulation of symbiosis, encompassing mutualism through parasitism	biological_process	0.34477	1	1	605	7	10392	FBgn0033785	-|
GO:0007264	small GTPase mediated signal transduction	biological_process	0.34666	1	18	605	272	10392	FBgn0003969,FBgn0023172,FBgn0025836,FBgn0024556,FBgn0031762,FBgn0035866,FBgn0038653,FBgn0035916,FBgn0003392,FBgn0011509,FBgn0034158,FBgn0015793,FBgn0086686,FBgn0000346,FBgn0266521,FBgn0050456,FBgn0261570,FBgn0034194	-|-|-|-|-|-|-|-|-|-|-|-|-|-|-|-|-|-|
GO:0032504	multicellular organism reproduction	biological_process	0.34777	1	4	605	50	10392	FBgn0263258,FBgn0042201,FBgn0265623,FBgn0036591	-|-|-|-|
GO:0042060	wound healing	biological_process	0.34792	1	3	605	36	10392	FBgn0036593,FBgn0051909,FBgn0036929	-|-|-|
GO:0030136	clathrin-coated vesicle	cellular_component	0.34812	1	1	605	7	10392	FBgn0035872	-|
GO:0006353	DNA-dependent transcription, termination	biological_process	0.34868	1	1	605	7	10392	FBgn0004456	-|
GO:0022904	respiratory electron transport chain	biological_process	0.34903	1	3	605	36	10392	FBgn0259683,FBgn0263346,FBgn0011227	-|-|-|
GO:0007548	sex differentiation	biological_process	0.35215	1	1	605	7	10392	FBgn0030468	-|
GO:0046660	female sex differentiation	biological_process	0.35215	1	1	605	7	10392	FBgn0030468	-|
GO:0030154	cell differentiation	biological_process	0.35222	1	4	605	50	10392	FBgn0042201,FBgn0265623,FBgn0036591,FBgn0263258	-|-|-|-|
GO:0003677	DNA binding	molecular_function	0.35301	1	80	605	1303	10392	Novel000042,FBgn0030486,FBgn0037275,FBgn0002899,FBgn0086613,FBgn0030893,FBgn0040477,FBgn0266375,FBgn0263512,FBgn0004638,FBgn0085407,FBgn0039116,FBgn0034182,FBgn0004512,FBgn0036918,FBgn0039117,FBgn0030474,FBgn0263606,FBgn0005624,FBgn0030899,FBgn0027581,FBgn0013809,FBgn0262519,FBgn0039110,FBgn0000617,FBgn0000611,FBgn0033855,FBgn0016754,FBgn0030904,FBgn0040290,FBgn0038252,FBgn0261545,FBgn0035921,FBg…	-|-|-|-|-|-|-|-|-|-|-|-|-|-|-|-|-|-|-|-|-|-|-|-|-|-|-|-|-|-|-|-|-|-|-|-|-|-|-|-|-|-|-|-|-|-|-|-|-|-|-|-|-|-|-|-|-|-|-|-|-|-|-|-|-|-|-|-|-|-|-|-|-|-|-|-|-|-|-|-|
GO:0007631	feeding behavior	biological_process	0.3532	1	1	605	7	10392	FBgn0038244	-|
GO:0042325	regulation of phosphorylation	biological_process	0.35354	1	1	605	7	10392	FBgn0029761	-|
GO:0042398	cellular modified amino acid biosynthetic process	biological_process	0.35366	1	3	605	36	10392	FBgn0035854,FBgn0263594,FBgn0262882	-|-|-|
GO:0044238	primary metabolic process	biological_process	0.3537	1	267	605	4491	10392	FBgn0085313,FBgn0027581,FBgn0029667,FBgn0030899,FBgn0032973,FBgn0038172,FBgn0003380,FBgn0030895,FBgn0030465,FBgn0030864,FBgn0031775,FBgn0261625,FBgn0263512,FBgn0266375,FBgn0266464,FBgn0036924,FBgn0030893,FBgn0037279,FBgn0250833,FBgn0035918,FBgn0038705,FBgn0000411,FBgn0029657,FBgn0001168,FBgn0001941,FBgn0029761,FBgn0030477,FBgn0261545,FBgn0033787,FBgn0038252,FBgn0030904,FBgn0015270,FBgn0033855,FBg…	-|-|-|-|-|-|-|-|-|-|-|-|-|-|-|-|-|-|-|-|-|-|-|-|-|-|-|-|-|-|-|-|-|-|-|-|-|-|-|-|-|-|-|-|-|-|-|-|-|-|-|-|-|-|-|-|-|-|-|-|-|-|-|-|-|-|-|-|-|-|-|-|-|-|-|-|-|-|-|-|-|-|-|-|-|-|-|-|-|-|-|-|-|-|-|-|-|-|-|-|-|-|-|-|-|-|-|-|-|-|-|-|-|-|-|-|-|-|-|-|-|-|-|-|-|-|-|-
GO:0046332	SMAD binding	molecular_function	0.35381	1	1	605	7	10392	FBgn0003326	-|
GO:0016310	phosphorylation	biological_process	0.35416	1	20	605	304	10392	FBgn0011227,FBgn0263346,FBgn0038167,FBgn0259683,FBgn0003169,FBgn0004784,FBgn0029761,FBgn0030465,FBgn0033791,FBgn0030864,FBgn0259168,FBgn0029672,FBgn0003093,FBgn0003091,FBgn0039623,FBgn0033773,FBgn0016672,FBgn0031784,FBgn0003256,FBgn0052944	-|-|-|-|-|-|-|-|-|-|-|-|-|-|-|-|-|-|-|-|
GO:0000150	recombinase activity	molecular_function	0.35452	1	1	605	7	10392	FBgn0002899	-|
GO:0044707	single-multicellular organism process	biological_process	0.35478	1	22	605	344	10392	FBgn0038167,FBgn0028963,FBgn0010453,FBgn0030482,FBgn0263219,FBgn0000358,FBgn0000357,FBgn0036929,FBgn0264741,FBgn0000355,FBgn0030715,FBgn0000356,FBgn0038244,FBgn0039115,FBgn0037399,FBgn0000463,FBgn0003882,FBgn0051909,FBgn0035870,FBgn0030468,FBgn0035872,FBgn0036593	-|-|-|-|-|-|-|-|-|-|-|-|-|-|-|-|-|-|-|-|-|-|
GO:0031461	cullin-RING ubiquitin ligase complex	cellular_component	0.35514	1	6	605	83	10392	FBgn0036421,FBgn0030873,FBgn0035845,FBgn0002899,FBgn0039632,FBgn0259148	-|-|-|-|-|-|
GO:0008061	chitin binding	molecular_function	0.35534	1	8	605	116	10392	Novel000079,FBgn0035845,FBgn0040687,Novel000078,FBgn0026077,FBgn0035844,FBgn0040950,FBgn0037236	-|-|-|-|-|-|-|-|
[truncated: 1,024 more rows]

## Sheet: Cis 7 day DR vs 7 day FF
GO_accession	Description	Term_type	Over_represented_pValue	Corrected_pValue	CAD_item	CAD_list	Bg_item	Bg_list	Gene_names	Gene_description
[truncated: 1,460 more rows]

## Sheet: Cis 42 day DR vs 42 day FF
GO_accession	Description	Term_type	Over_represented_pValue	Corrected_pValue	CAD_item	CAD_list	Bg_item	Bg_list	Gene_names	Gene_description
[truncated: 1,535 more rows]

## Sheet: Trans 7 day vs 42 day in DR
GO_accession	Description	Term_type	Over_represented_pValue	Corrected_pValue	CAD_item	CAD_list	Bg_item	Bg_list	Gene_names	Gene_description
[truncated: 1,498 more rows]

[truncated: 3 more sheets: Trans 7 day vs 42 day in FF, Trans 7 DR vs 7 day FF, Trans 42 day DR vs 42 day FF]
