# Supplementary material for: LncRNA mediated regulation of aging pathways in Drosophila melanogaster during dietary restriction
Source: Aging (Albany NY). 2016 Sep 27;8(9):2182–97. doi: 10.18632/aging.101062 (PMC5076457; doi:10.18632/aging.101062)
Supplement: Supplementary file 8 [file aging-08-2182-s008.xls]

## Sheet: lncRNA and Cis targets
lncRNA_ID	Target_mRNA_ID
FBgn0004911	FBgn0035481,FBgn0045479,FBgn0035470,FBgn0045477,FBgn0035480,FBgn0003943,FBgn0035482,FBgn0035475,FBgn0035469,FBgn0035486,FBgn0035468,FBgn0004880,FBgn0026592,FBgn0035483,FBgn0013751,FBgn0004875,FBgn0052255,FBgn0264516,FBgn0045478,FBgn0035478,FBgn0035484,FBgn0045476,FBgn0035476,FBgn0035471,FBgn0035479,FBgn0035473,FBgn0041147,FBgn0035477,FBgn0004895,FBgn0004910,FBgn0027552
FBgn0017424	FBgn0022959,FBgn0000594,FBgn0036255,FBgn0036250,FBgn0036262,FBgn0013997,FBgn0036266,Novel000129,FBgn0036259,FBgn0263647,FBgn0036258,FBgn0036249,FBgn0264725,FBgn0036264,FBgn0011335,FBgn0036246,FBgn0041096,FBgn0036260,FBgn0036263,FBgn0036248,FBgn0250876,FBgn0022709,FBgn0046296,FBgn0036254,FBgn0011455,FBgn0250825,FBgn0002565,FBgn0000592,FBgn0052099,FBgn0027843,FBgn0036242,FBgn0260941,FBgn0036257
FBgn0030356	FBgn0030351,FBgn0030350,FBgn0250871,FBgn0030339,FBgn0030364,FBgn0266019,FBgn0030361,FBgn0263111,FBgn0030357,FBgn0030358,FBgn0260780,FBgn0030341,FBgn0030362,FBgn0030344,FBgn0000808,FBgn0043001,FBgn0030345,FBgn0030348,FBgn0030347,FBgn0030352,FBgn0030340,FBgn0030342,FBgn0030349,FBgn0030360,FBgn0262686,FBgn0030346,FBgn0030343,FBgn0030338,FBgn0003865,FBgn0001083,FBgn0030359,FBgn0030354
FBgn0030911	FBgn0008635,FBgn0083228,FBgn0030900,FBgn0030913,FBgn0030904,FBgn0004956,FBgn0053542,FBgn0265784,FBgn0004957,FBgn0052549,FBgn0030915,FBgn0030912,FBgn0053639,FBgn0030899,FBgn0022355,FBgn0030905,FBgn0030914
FBgn0031778	FBgn0031769,FBgn0261683,FBgn0085208,FBgn0031774,FBgn0031771,FBgn0001170,FBgn0085409,FBgn0031785,FBgn0031784,FBgn0266450,FBgn0031764,FBgn0031772,FBgn0031776,FBgn0051642,FBgn0025742,FBgn0051643,FBgn0031765,FBgn0031766,FBgn0031770,FBgn0031777,FBgn0000308,FBgn0031759,FBgn0031773,FBgn0085209,FBgn0031775,FBgn0051639,FBgn0001089,FBgn0031779,FBgn0001942,FBgn0029161,FBgn0266445,FBgn0266449,FBgn0261697,FBg…
FBgn0040554	FBgn0000046,FBgn0023495,FBgn0038151,FBgn0004049,FBgn0038150,FBgn0038149,FBgn0038157,FBgn0038148,FBgn0044511,FBgn0038143,FBgn0038145,FBgn0086371,FBgn0053977,FBgn0038144,FBgn0040553,FBgn0038153,FBgn0051337,FBgn0038142,FBgn0261846,FBgn0041711,FBgn0259831,FBgn0027610,FBgn0038156,FBgn0038146,FBgn0038147
FBgn0040859	Novel000233,FBgn0030360,FBgn0030364,FBgn0030361,FBgn0052656,Novel000232,FBgn0043001,FBgn0030377,FBgn0267001,FBgn0030370,FBgn0030369,FBgn0030359,FBgn0030366,FBgn0030376,FBgn0030373,FBgn0001083,Novel000231,FBgn0030374,FBgn0030375,FBgn0030365,FBgn0085352,FBgn0030362,FBgn0030367
FBgn0040965	FBgn0027600,FBgn0032156,FBgn0032161,FBgn0004867,FBgn0015664,FBgn0053302,FBgn0032167,FBgn0032175,FBgn0051712,FBgn0032171,FBgn0259712,FBgn0024285,FBgn0032170,FBgn0032166,FBgn0051875,FBgn0053301,FBgn0032151,FBgn0051713,FBgn0011272,FBgn0265002,FBgn0032154,FBgn0051755,FBgn0040064,FBgn0032162,FBgn0032169,FBgn0032168,FBgn0032153,FBgn0032163,FBgn0032157,FBgn0029174,FBgn0085212,FBgn0000180,FBgn0032160,FBg…
FBgn0046297	FBgn0054040,FBgn0042098,FBgn0034667,FBgn0004362,FBgn0025573,FBgn0034661,FBgn0034660,FBgn0034664,FBgn0050403,FBgn0050398,FBgn0034657,FBgn0034658,FBgn0034665,FBgn0034666,FBgn0010228,FBgn0034659,FBgn0264714,FBgn0085397,FBgn0050404,FBgn0085233,FBgn0050395,FBgn0034663,FBgn0034662
FBgn0046756	FBgn0005632,FBgn0003065,FBgn0039883,FBgn0039863,FBgn0003870,FBgn0270927,FBgn0000557,FBgn0022349,FBgn0039872,FBgn0039882,FBgn0039864,FBgn0261479,FBgn0039875,FBgn0039873,FBgn0261583,FBgn0027620,FBgn0017448,FBgn0039877,FBgn0039870,FBgn0039879,FBgn0011224,FBgn0266268,Novel000164,FBgn0250755,FBgn0039868,FBgn0039867,FBgn0039881,FBgn0039869,FBgn0000150,FBgn0039876
FBgn0047092	FBgn0264270,FBgn0027342,FBgn0029937,FBgn0029932,FBgn0029936,FBgn0004143,FBgn0029935,FBgn0029939,FBgn0029930,Novel000221
FBgn0047205	FBgn0045759,FBgn0035730,FBgn0035725,FBgn0041194,FBgn0035718,FBgn0250849,FBgn0035727,FBgn0035719,FBgn0035722,FBgn0035720,FBgn0263387,FBgn0035726,FBgn0035724,FBgn0052391,FBgn0035733,FBgn0035721,FBgn0260660,FBgn0261445,FBgn0001104,FBgn0029117,FBgn0054030,FBgn0266962,FBgn0035734
FBgn0050009	FBgn0261698,FBgn0033500,FBgn0033502,FBgn0262837,FBgn0033504,FBgn0026403,FBgn0000448,FBgn0041242,FBgn0262791,FBgn0250822,FBgn0033501,FBgn0261686,FBgn0033508,FBgn0033499,FBgn0003660,FBgn0028426,FBgn0033494,FBgn0250840,FBgn0262836,FBgn0033498,FBgn0033497,FBgn0263270,FBgn0085250,FBgn0033512,FBgn0262790,FBgn0005619,FBgn0263271,FBgn0033507,FBgn0262807
FBgn0050055	FBgn0033750,FBgn0266487,FBgn0033754,FBgn0033766,FBgn0050044,FBgn0004435,FBgn0033748,FBgn0050054,FBgn0050052,FBgn0033762,FBgn0022764,FBgn0027356,FBgn0061360,Novel000063,FBgn0033755,FBgn0261625,FBgn0033752,FBgn0028683,FBgn0045063,FBgn0033769,FBgn0033761,Novel000062,FBgn0033763,FBgn0050053,FBgn0053792,FBgn0053632,FBgn0033751,Novel000064,FBgn0033760,FBgn0003527,FBgn0053752,FBgn0011592,FBgn0061359,FBg…
FBgn0050121	FBgn0034382,FBgn0262103,FBgn0050122,FBgn0034383,FBgn0262595,FBgn0034399,FBgn0053147,FBgn0034394,FBgn0034381,FBgn0034380,FBgn0265627,FBgn0034398,FBgn0259202,FBgn0023214,Novel000068,FBgn0034379,FBgn0265626,FBgn0034397,FBgn0034389,FBgn0053136,FBgn0034400,FBgn0034387,FBgn0034377,FBgn0034396,FBgn0010551,FBgn0262102,FBgn0265625,FBgn0259682,FBgn0034390,FBgn0053998,FBgn0034371,FBgn0034391,FBgn0010651,FBg…
FBgn0051044	FBgn0062442,FBgn0039648,FBgn0039644,FBgn0039641,FBgn0028671,FBgn0267104,FBgn0041186,FBgn0039639,FBgn0039640,FBgn0039656,FBgn0039635,FBgn0039637,FBgn0039636,FBgn0039638,FBgn0003525,FBgn0051445,FBgn0028476,FBgn0005596,FBgn0015622,FBgn0039659,FBgn0014427,FBgn0051427,FBgn0039654,FBgn0039647,Novel000163,FBgn0039650,FBgn0041588,FBgn0039651,Novel000162,FBgn0028692,FBgn0039655,FBgn0263236,FBgn0039645,FBg…
FBgn0051386	FBgn0004595,FBgn0037883,FBgn0037873,FBgn0026314,FBgn0037885,FBgn0037877,FBgn0037891,FBgn0037870,FBgn0026064,FBgn0020910,FBgn0037884,FBgn0037879,FBgn0037875,FBgn0037889,FBgn0037876,FBgn0037881,FBgn0026063,FBgn0037878,FBgn0051388,FBgn0261808,FBgn0037890,FBgn0051441,FBgn0037880,FBgn0086472,FBgn0037882,FBgn0040252,FBgn0040250,FBgn0037888,FBgn0026315,FBgn0037874
FBgn0051451	FBgn0053100,FBgn0264741,FBgn0039140,FBgn0015282,FBgn0039125,FBgn0051141,FBgn0043455,FBgn0039129,FBgn0039130,FBgn0039139,FBgn0026576,FBgn0051184,FBgn0039137,FBgn0001098,FBgn0015795,FBgn0053108,FBgn0039136,FBgn0039124,FBgn0039126,FBgn0039131,FBgn0039132,FBgn0020647,FBgn0051140,FBgn0005674,FBgn0025574,FBgn0040283,FBgn0039135,FBgn0047114,FBgn0013347,FBgn0039145,FBgn0016754,FBgn0264740,FBgn0001230,FBg…
FBgn0051647	FBgn0051915,FBgn0031707,FBgn0031708,Novel000030,FBgn0051648,FBgn0031702,FBgn0031713,FBgn0031715,FBgn0016660,FBgn0051989,FBgn0031716,Novel000031,FBgn0031711,FBgn0000318,FBgn0031703,FBgn0261963,FBgn0031710,FBgn0016920
FBgn0051781	FBgn0051805,FBgn0260758,FBgn0032618,FBgn0266491,FBgn0032612,Novel000019,FBgn0040985,FBgn0051810,FBgn0053179,FBgn0261671,FBgn0051739,FBgn0052832,FBgn0040260,FBgn0032620,FBgn0032603,FBgn0040261,FBgn0086673,FBgn0040262,FBgn0026150,FBgn0022213,FBgn0032615,Novel000020,FBgn0051809,FBgn0264695,FBgn0085342,FBgn0032609,FBgn0032614,FBgn0004797,FBgn0266492,FBgn0000406,FBgn0032613
FBgn0051840	FBgn0260011,FBgn0028936,FBgn0028544,FBgn0028430,FBgn0027929,FBgn0261514,FBgn0032538,FBgn0028543,FBgn0027348,FBgn0028904,FBgn0261628,FBgn0054003,FBgn0028872,FBgn0028519,FBgn0028526,FBgn0001967,FBgn0259896,FBgn0028542,FBgn0051769,FBgn0032536,FBgn0003255,FBgn0028875,FBgn0028940,FBgn0261582,FBgn0028939
FBgn0051845	FBgn0028532,FBgn0028847,FBgn0026373,FBgn0000153,FBgn0053306,FBgn0051813,FBgn0064115,FBgn0015271,FBgn0028533,FBgn0028931,FBgn0028919,FBgn0028539,FBgn0028540,FBgn0004406,FBgn0053307,FBgn0028538,FBgn0024846,FBgn0051814,FBgn0263206,FBgn0001965,FBgn0032533,FBgn0028658,FBgn0028848,FBgn0028534,FBgn0260407,FBgn0027844,FBgn0004407,FBgn0001961,FBgn0028541,FBgn0028509,FBgn0028920,FBgn0028932
FBgn0052027	FBgn0036810,FBgn0036819,FBgn0036811,Novel000108,FBgn0036814,FBgn0036816,FBgn0036818,FBgn0014075,FBgn0036822,FBgn0036813,FBgn0036828,FBgn0036815,FBgn0036827,FBgn0036833,Novel000110,FBgn0036829,FBgn0036820,FBgn0036824,FBgn0262351,FBgn0036821,FBgn0001078,FBgn0000261,FBgn0036830,FBgn0085284,FBgn0036826,FBgn0036831,FBgn0036812,FBgn0025807,Novel000109,FBgn0036817,FBgn0036832,FBgn0052204,FBgn0027057,FBg…
FBgn0052111	FBgn0015904,FBgn0052109,FBgn0036298,FBgn0036302,FBgn0014007,FBgn0015919,FBgn0036301,FBgn0052112,FBgn0014343,FBgn0085271,FBgn0261933,Novel000104,FBgn0036299,FBgn0036300
FBgn0052160	FBgn0036610,FBgn0036584,FBgn0036603,FBgn0036594,FBgn0036586,Novel000105,FBgn0036602,FBgn0036593,FBgn0036579,FBgn0036590,FBgn0036608,FBgn0266417,FBgn0036622,FBgn0036620,FBgn0036607,FBgn0262894,FBgn0036617,FBgn0040074,FBgn0036601,FBgn0036592,FBgn0036595,FBgn0053257,FBgn0040799,FBgn0036623,FBgn0036577,FBgn0036600,FBgn0085276,FBgn0085277,FBgn0042201,FBgn0036588,FBgn0040794,FBgn0036624,FBgn0042137,FBg…
FBgn0052194	FBgn0264746,FBgn0052195,FBgn0262100,Novel000131,FBgn0036775,FBgn0003997,FBgn0259739,FBgn0264747,FBgn0020300,FBgn0036777,FBgn0036778,FBgn0036774,FBgn0085282,FBgn0036781,FBgn0036780,FBgn0036773,FBgn0002901,FBgn0052192,Novel000130,FBgn0264748,FBgn0000568
FBgn0052205	FBgn0023395,FBgn0036879,FBgn0052214,FBgn0036868,FBgn0036870,FBgn0036880,FBgn0003089,FBgn0036874,FBgn0036872,FBgn0052208,FBgn0036875,FBgn0053062,FBgn0036877,FBgn0036876,FBgn0036873,Novel000132,FBgn0052212,FBgn0036878,FBgn0052213,FBgn0052206,FBgn0036871
FBgn0052218	FBgn0013303,FBgn0036911,FBgn0036926,FBgn0036921,FBgn0036922,FBgn0040786,FBgn0036908,FBgn0036924,FBgn0013799,FBgn0020887,FBgn0036916,FBgn0036909,FBgn0036915,FBgn0036925,FBgn0261283,FBgn0036910,FBgn0036920,FBgn0261506,FBgn0001324,FBgn0085287,FBgn0262518,FBgn0028695,FBgn0005633,FBgn0024889,FBgn0036906,FBgn0014037,FBgn0052219,FBgn0052221,FBgn0052220,FBgn0260874,FBgn0020389,FBgn0036913,FBgn0036918,FBg…
FBgn0052224	FBgn0036950,FBgn0261556,FBgn0036959,FBgn0036941,FBgn0265959,FBgn0036949,FBgn0036938,FBgn0024814,FBgn0036942,FBgn0260397,FBgn0262022,FBgn0036939,FBgn0036952,FBgn0036945,FBgn0036964,FBgn0260393,FBgn0036951,FBgn0036962,FBgn0036953,FBgn0052227,FBgn0036967,FBgn0052228,FBgn0036947,FBgn0036940,FBgn0005198,FBgn0036937,FBgn0052225,FBgn0036958,FBgn0036948,FBgn0036956,FBgn0052226
FBgn0052582	FBgn0030695,FBgn0014391,FBgn0030703,FBgn0030686,FBgn0045073,FBgn0263747,FBgn0030706,FBgn0030688,FBgn0030680,Novel000207,FBgn0260938,FBgn0003345,FBgn0026374,FBgn0030685,FBgn0001105,FBgn0030678,FBgn0030700,FBgn0030704,FBgn0025809,FBgn0030699,FBgn0011741,FBgn0030692,FBgn0026666,FBgn0052581,Novel000208,FBgn0030701,FBgn0030707,FBgn0030691,FBgn0002914,FBgn0027329,FBgn0010315,FBgn0003392,FBgn0010240,FBg…
FBgn0052636	FBgn0030465,FBgn0030486,FBgn0000346,FBgn0030468,FBgn0030482,FBgn0004456,FBgn0030485,FBgn0266375,FBgn0030466,FBgn0030479,FBgn0040309,FBgn0010198,FBgn0030480,FBgn0030484,FBgn0026749,FBgn0261085,FBgn0030467,FBgn0030481,FBgn0030478,FBgn0041210,FBgn0030474,FBgn0030483,FBgn0030462,FBgn0030477,FBgn0052639
FBgn0052652	FBgn0002562,FBgn0030385,FBgn0030386,FBgn0259680,FBgn0030394,FBgn0030395,FBgn0259143,FBgn0052651,FBgn0030391,FBgn0030390,FBgn0267001,FBgn0030396,FBgn0030389,FBgn0030384
FBgn0052657	FBgn0030361,Novel000233,FBgn0030360,FBgn0030364,FBgn0030369,FBgn0030370,Novel000232,FBgn0052656,FBgn0030377,FBgn0267001,FBgn0043001,Novel000231,FBgn0000808,FBgn0030374,FBgn0030373,FBgn0030376,FBgn0030366,FBgn0030359,FBgn0003865,FBgn0001083,FBgn0085352,FBgn0030367,FBgn0030362,FBgn0030375,FBgn0030365
FBgn0052660	FBgn0030359,FBgn0030354,FBgn0001083,FBgn0003865,FBgn0030338,FBgn0030343,FBgn0030346,FBgn0262686,FBgn0030360,FBgn0030349,FBgn0043001,FBgn0030340,FBgn0030342,FBgn0030352,FBgn0030347,FBgn0030348,FBgn0030345,FBgn0000808,FBgn0030344,FBgn0260780,FBgn0030358,FBgn0030362,FBgn0030341,FBgn0030364,FBgn0266019,FBgn0030361,FBgn0263111,FBgn0030357,FBgn0030350,FBgn0030351,FBgn0030339,FBgn0250871
FBgn0052690	FBgn0040942,FBgn0030183,FBgn0028342,FBgn0264503,FBgn0030187,Novel000230,FBgn0085437,FBgn0030181,Novel000229,FBgn0259170,FBgn0030186,FBgn0263220,FBgn0040941,FBgn0083940
FBgn0052773	FBgn0266570,FBgn0022942,FBgn0022768,FBgn0262738,FBgn0029709,FBgn0029715,Novel000216,FBgn0025739,FBgn0000179,FBgn0040906,FBgn0002707,FBgn0029708,FBgn0262699,FBgn0029720,FBgn0029710,FBgn0003053,FBgn0028325,FBgn0029714,FBgn0029712,FBgn0011277,FBgn0025388,FBgn0025387,FBgn0025613,Novel000215,FBgn0011760,FBgn0025612,FBgn0029707,FBgn0029719,FBgn0040907,FBgn0029717,FBgn0029722,FBgn0029718,FBgn0003210,FBg…
FBgn0052835	FBgn0034789,FBgn0267823,FBgn0010660,FBgn0034786,FBgn0034800,FBgn0034791,FBgn0034792,FBgn0003900,FBgn0261584,FBgn0034797,FBgn0034795,FBgn0034788,FBgn0261705,FBgn0034807,FBgn0010078,FBgn0034802,FBgn0034793,FBgn0050187,FBgn0034803,FBgn0034804,FBgn0004896,FBgn0034796,FBgn0052833,FBgn0052834,FBgn0001263,FBgn0261564,FBgn0034808
FBgn0053218	FBgn0052797,FBgn0029608,FBgn0003048,FBgn0023527,FBgn0027296,FBgn0000810,FBgn0001150,FBgn0003159,FBgn0023528,FBgn0023526,FBgn0040385,FBgn0003079,FBgn0264598,FBgn0023525,FBgn0023529,FBgn0044047,FBgn0085362,FBgn0023523,FBgn0001330,FBgn0023524,FBgn0040389,FBgn0040391,FBgn0040392,FBgn0000377
FBgn0053963	FBgn0030403,FBgn0020513,FBgn0030417,FBgn0030407,FBgn0264542,FBgn0030400,FBgn0265523,FBgn0030411,FBgn0030418,FBgn0030409,FBgn0015024,FBgn0011837,FBgn0030408,FBgn0030406,FBgn0052654,FBgn0030410,FBgn0030412,FBgn0041203
FBgn0053987	FBgn0085202,FBgn0040519,FBgn0051601,FBgn0032971,FBgn0084001,FBgn0051702,FBgn0032968,FBgn0032973,FBgn0051693,FBgn0051703,FBgn0032969,FBgn0032972,FBgn0028979,FBgn0260996
FBgn0054006	FBgn0011289,FBgn0039509,FBgn0046247,FBgn0029155,FBgn0085322,FBgn0039503,FBgn0051068,FBgn0039500,FBgn0039494,FBgn0004197,FBgn0039491,FBgn0042111,Novel000159,FBgn0039498,FBgn0005696,FBgn0039507,FBgn0051065,FBgn0261995,FBgn0010328,FBgn0039510,FBgn0261996,FBgn0051064,FBgn0039489,FBgn0039492,FBgn0039490,FBgn0003482,FBgn0010441,FBgn0015737,FBgn0039508,FBgn0039504,FBgn0039501,FBgn0040609,FBgn0039488,FBg…
FBgn0054024	FBgn0002631,FBgn0039378,FBgn0039386,FBgn0039395,FBgn0015269,FBgn0262576,FBgn0028717,FBgn0002629,FBgn0039380,FBgn0002609,FBgn0011668,FBgn0002732,FBgn0000206,FBgn0039396,FBgn0039387,FBgn0039381,FBgn0259146,FBgn0040602,FBgn0039379,FBgn0027865,FBgn0039398,FBgn0051089,FBgn0250757,FBgn0051091,FBgn0002578,FBgn0002735,FBgn0002592,FBgn0002734,FBgn0002733,FBgn0039385
FBgn0054044	FBgn0038163,FBgn0010258,FBgn0028487,FBgn0038181,FBgn0000454,FBgn0038167,FBgn0259732,FBgn0038165,FBgn0038161,FBgn0004237,FBgn0038180,FBgn0004587,FBgn0038172,FBgn0038173,FBgn0038183,FBgn0259730,FBgn0040076,FBgn0051469,FBgn0015778,FBgn0038168,FBgn0259721,FBgn0024555,FBgn0267383,FBgn0038166,FBgn0259731,FBgn0038179,FBgn0260464,FBgn0259733,FBgn0038170,FBgn0263396,FBgn0040077,FBgn0085412,FBgn0002937
FBgn0054046	FBgn0039864,FBgn0039862,FBgn0039859,FBgn0017448,FBgn0039870,FBgn0261479,FBgn0039873,FBgn0261583,FBgn0039875,FBgn0003065,FBgn0039863,FBgn0000557,FBgn0270927,Novel000164,FBgn0250755,FBgn0039858,FBgn0039861,FBgn0039879,FBgn0039872,FBgn0039882,FBgn0022349,FBgn0027620,FBgn0039877,FBgn0005632,FBgn0003870,FBgn0039867,FBgn0039868,FBgn0039876,FBgn0000150,FBgn0011655,FBgn0039881,FBgn0039869,FBgn0039860
FBgn0054047	FBgn0035592,FBgn0263831,FBgn0040842,FBgn0040843,FBgn0035585,FBgn0035587,FBgn0035594,FBgn0035590,FBgn0010747,FBgn0052423,FBgn0005775,FBgn0035586,FBgn0035589,FBgn0035593,FBgn0035591,FBgn0035588,FBgn0028962
FBgn0054052	FBgn0029608,FBgn0029606,FBgn0004397,FBgn0023528,FBgn0003159,FBgn0023527,FBgn0027296,FBgn0000810,FBgn0003048,FBgn0044047,FBgn0023529,FBgn0023525,FBgn0264598,FBgn0003079,FBgn0040385,FBgn0023526,FBgn0000377,FBgn0040392,FBgn0040389,FBgn0023524,FBgn0040391,FBgn0001330,FBgn0023523,FBgn0085362
FBgn0058053	Novel000119,FBgn0058470,Novel000118,Novel000120,FBgn0011288,FBgn0058045
FBgn0058172	FBgn0011638,FBgn0003475,FBgn0260000,FBgn0259998,FBgn0040996,Novel000040
FBgn0058469	Novel000212,FBgn0025837,FBgn0025836,Novel000213,FBgn0025835,FBgn0029128
FBgn0062961	FBgn0262102,FBgn0034366,FBgn0259682,FBgn0265625,FBgn0034390,FBgn0053998,FBgn0034371,FBgn0034361,FBgn0034368,FBgn0034392,FBgn0034391,FBgn0261587,FBgn0010651,FBgn0034372,FBgn0053147,FBgn0034394,FBgn0034362,FBgn0034381,FBgn0034380,FBgn0265627,FBgn0034365,FBgn0034382,FBgn0262103,FBgn0050122,FBgn0000566,FBgn0034383,FBgn0262595,FBgn0050115,FBgn0053136,FBgn0034389,FBgn0034387,FBgn0034377,FBgn0034360,FBg…
FBgn0063083	FBgn0035766,FBgn0035781,FBgn0259203,FBgn0002909,FBgn0035756,FBgn0052380,FBgn0035776,FBgn0035782,FBgn0052379,FBgn0016983,FBgn0035785,FBgn0035761,FBgn0035787,FBgn0052382,FBgn0035792,FBgn0035779,FBgn0035786,FBgn0011640,FBgn0035769,FBgn0035777,FBgn0264303,FBgn0014011,FBgn0015298,FBgn0035770,FBgn0015033,FBgn0035791,FBgn0264302,FBgn0035760,FBgn0052383,FBgn0035789,FBgn0259935,FBgn0035790,FBgn0035762,FBg…
FBgn0063127	FBgn0026566,FBgn0004777,FBgn0002522,FBgn0004778,FBgn0250846,FBgn0000166,FBgn0037461,FBgn0004779,FBgn0051481,FBgn0004783,FBgn0051482,FBgn0004054,FBgn0004780,FBgn0004053,FBgn0024912,FBgn0004782,FBgn0262801,FBgn0085326,FBgn0037462,FBgn0000439,FBgn0037460,FBgn0000071,FBgn0004781,FBgn0026565,FBgn0000552,FBgn0010355,FBgn0051286
FBgn0083990	FBgn0264607,FBgn0025726,FBgn0025741,FBgn0019985,FBgn0011642,FBgn0023213,FBgn0039930,FBgn0010217,FBgn0052016,FBgn0019650,FBgn0087002,FBgn0039929,FBgn0039932
FBgn0084008	FBgn0033020,FBgn0050441,FBgn0033015,FBgn0033017,FBgn0033019,FBgn0261403,FBgn0053554,Novel000087,FBgn0033010
FBgn0085582	Novel000079,FBgn0003256,Novel000078
FBgn0085812	FBgn0027341,FBgn0015331,FBgn0000500,FBgn0037213,FBgn0010225,FBgn0259821,FBgn0037218,FBgn0037220,FBgn0051516,FBgn0261436,FBgn0058198,FBgn0037215,FBgn0037217
FBgn0250817	Novel000040,FBgn0015803,FBgn0259998,FBgn0040996,FBgn0260000,FBgn0003475,FBgn0011638
FBgn0259993	FBgn0015288,FBgn0086368,FBgn0264449,FBgn0025620,FBgn0040383,FBgn0029535,FBgn0027343,FBgn0029532,FBgn0025616,FBgn0029531,FBgn0021764,FBgn0026874,FBgn0260855,FBgn0040892,FBgn0040343,FBgn0040382,FBgn0015799,FBgn0025621
FBgn0259996	Novel000040,FBgn0259998,FBgn0040996,FBgn0260000,FBgn0011638,FBgn0003475
FBgn0260722	FBgn0261049,FBgn0037715,FBgn0037718,FBgn0037702,FBgn0003334,FBgn0037714,FBgn0267790,FBgn0261552,FBgn0014023,FBgn0037720,FBgn0037722,FBgn0037726,FBgn0037707,FBgn0037703,FBgn0037712,FBgn0037721,FBgn0037710,FBgn0037709,FBgn0037724,FBgn0037708,FBgn0037713,FBgn0037697,FBgn0037723,FBgn0014022,FBgn0027338,Novel000145,FBgn0053654,FBgn0037719,FBgn0043791,FBgn0037717,FBgn0014380,FBgn0037698,FBgn0027950,FBg…
FBgn0261429	FBgn0261403,Novel000087,FBgn0033017,FBgn0259247,FBgn0033015,FBgn0050441,FBgn0033020,Novel000088,FBgn0033021,Novel000049,FBgn0033019
FBgn0261522	FBgn0000233,FBgn0261931,FBgn0030151,FBgn0261617,FBgn0001186,FBgn0020378,FBgn0030148,FBgn0027084,FBgn0028341,FBgn0264691,FBgn0052698,FBgn0030141
FBgn0261586	FBgn0053803,FBgn0032943,FBgn0023091,FBgn0051611,FBgn0051613,FBgn0051618,FBgn0264556,FBgn0051626,FBgn0032940,FBgn0032938,FBgn0023090,FBgn0053910,FBgn0032946,FBgn0051617,FBgn0053804,FBgn0026577,FBgn0053801,FBgn0261239,FBgn0053909,FBgn0021856,FBgn0032945,FBgn0061209,FBgn0041245,FBgn0000370
FBgn0261632	FBgn0050076,FBgn0050479,FBgn0050077,FBgn0010638,FBgn0033954,FBgn0053468,FBgn0033950,FBgn0033943,FBgn0033951,FBgn0050480,FBgn0020269,FBgn0019938,FBgn0033953,FBgn0026427,FBgn0264540,FBgn0003742,FBgn0010397,FBgn0033952,FBgn0033945,FBgn0033958,FBgn0033955,FBgn0265974,FBgn0053469,FBgn0033948,FBgn0033949,FBgn0262881
FBgn0261636	FBgn0035148,FBgn0035153,Novel000126,FBgn0035154,FBgn0035159,FBgn0035145,FBgn0035150,FBgn0035143,FBgn0035155,FBgn0035151,FBgn0035141,FBgn0035149,FBgn0035140,FBgn0035147,FBgn0035158,FBgn0085298,FBgn0052483,FBgn0035152,FBgn0025676,FBgn0035146,FBgn0263042,FBgn0035144,FBgn0035157,FBgn0016715,FBgn0001316,FBgn0035142,FBgn0260862
FBgn0261699	FBgn0031792,FBgn0265778,FBgn0031803,FBgn0031800,FBgn0026755,FBgn0015623,FBgn0031802,FBgn0031799,FBgn0053531,FBgn0031791,FBgn0260452,FBgn0031805,FBgn0264543,FBgn0085409,FBgn0031804,FBgn0031801
FBgn0261700	FBgn0040736,FBgn0034330,FBgn0034329,FBgn0034331,FBgn0040737,FBgn0025583,FBgn0050120,FBgn0034352,FBgn0013983,FBgn0063491,FBgn0053198,FBgn0064237,FBgn0063492,FBgn0034327,FBgn0034326,FBgn0063498,FBgn0010575,FBgn0063497,FBgn0034351,FBgn0040735,FBgn0063496,FBgn0034323,FBgn0040733,FBgn0261119,FBgn0034346,FBgn0034350,FBgn0040734,FBgn0050118,FBgn0063495,FBgn0034321,FBgn0034322,Novel000067,FBgn0034345,FBg…
FBgn0261709	FBgn0032434,FBgn0259176,FBgn0032436,FBgn0032435,FBgn0085424,FBgn0032439,FBgn0032433,FBgn0051858
FBgn0261813	FBgn0036161,FBgn0036158,FBgn0265469,FBgn0028668,FBgn0036162,FBgn0028667,FBgn0036154,FBgn0036153,FBgn0036159,FBgn0036160,FBgn0036156,FBgn0036152,FBgn0036155,FBgn0036157
FBgn0261814	FBgn0004049,FBgn0038149,FBgn0038157,FBgn0038148,FBgn0038150,FBgn0023495,FBgn0000046,FBgn0038151,FBgn0038142,FBgn0261846,FBgn0086371,FBgn0053977,FBgn0038145,FBgn0038143,FBgn0044511,FBgn0038153,FBgn0038144,FBgn0040553,FBgn0038140,FBgn0041711,FBgn0045442,FBgn0038156,FBgn0027610,FBgn0038147,FBgn0038146,FBgn0259831
FBgn0261833	FBgn0053970,FBgn0000064,FBgn0039420,FBgn0039421,FBgn0039425,FBgn0040606,FBgn0039419,FBgn0039424,Novel000158,FBgn0085320
FBgn0261835	FBgn0261260,FBgn0030141,FBgn0054028,FBgn0030136,FBgn0052699,FBgn0028327,FBgn0054026,FBgn0259741,FBgn0001186,FBgn0264691,FBgn0027084,FBgn0030137,FBgn0028341,FBgn0052702,FBgn0267253,FBgn0261931
FBgn0261924	FBgn0028507,FBgn0028935,FBgn0028902,FBgn0041183,FBgn0028514,FBgn0051821,FBgn0028856,FBgn0051735,FBgn0041627,FBgn0028900,FBgn0051823,FBgn0028857,FBgn0265668,FBgn0261925,FBgn0051826,FBgn0028645,FBgn0028901,FBgn0262150,FBgn0032577,FBgn0264260,FBgn0028903,FBgn0001990
FBgn0261927	FBgn0026702,FBgn0029785,FBgn0052758,FBgn0029809,FBgn0261610,FBgn0013987,FBgn0000394,FBgn0029804,FBgn0029778,FBgn0029807,FBgn0259150,FBgn0085464,FBgn0029799,FBgn0029810,FBgn0046687,FBgn0029795,FBgn0053080,Novel000201,FBgn0259994,FBgn0250904,FBgn0029801,FBgn0027564,FBgn0015794,FBgn0029791,FBgn0259926,FBgn0261383,FBgn0029798,FBgn0004687,FBgn0003747,FBgn0029800,FBgn0028474,FBgn0263511,FBgn0259149,FBg…
FBgn0262025	FBgn0083975,FBgn0003249,FBgn0038772,FBgn0064119,FBgn0045471,FBgn0051206,FBgn0038775,FBgn0038771,FBgn0260466,FBgn0040571,FBgn0038773,FBgn0038774
FBgn0262028	FBgn0038385,FBgn0052855,FBgn0003117,FBgn0010379,FBgn0266566,FBgn0038397,FBgn0038389,FBgn0027948,FBgn0052856,FBgn0038386,FBgn0026059,FBgn0013334,FBgn0038391,FBgn0038398,FBgn0038394,FBgn0051088,FBgn0038396,FBgn0038387,Novel000182,FBgn0038381,FBgn0003507,FBgn0038390,FBgn0085305,FBgn0024222,FBgn0038395,FBgn0022787,FBgn0038388,FBgn0027657,FBgn0002783
FBgn0262033	FBgn0010314,FBgn0032111,FBgn0267252,FBgn0032110,FBgn0040097,FBgn0041092,FBgn0032104,FBgn0032105,FBgn0032109,FBgn0263082,FBgn0026439,FBgn0032115,FBgn0085210,FBgn0085395,FBgn0012036
FBgn0262095	FBgn0032730,FBgn0032720,FBgn0001202,FBgn0032741,FBgn0032728,FBgn0086710,FBgn0003896,FBgn0051792,FBgn0015772,FBgn0032734,FBgn0032724,FBgn0032726,FBgn0032729,FBgn0051793,FBgn0002022,FBgn0032731,FBgn0263198,FBgn0032744,FBgn0032740,FBgn0032733,FBgn0086442,FBgn0032732,FBgn0028569,FBgn0032725,FBgn0032719,FBgn0032723,FBgn0046302,FBgn0032727,FBgn0032721,FBgn0051800
FBgn0262097	FBgn0016076,FBgn0015031,FBgn0031696,FBgn0031698,FBgn0031702,FBgn0016920,FBgn0016660,FBgn0031701,FBgn0031703,FBgn0031700,FBgn0031697,FBgn0261963
FBgn0262105	FBgn0037763,FBgn0037766,FBgn0037755,FBgn0262477,FBgn0037742,FBgn0261599,FBgn0037747,FBgn0085331,FBgn0024330,FBgn0037743,FBgn0037758,FBgn0037762,FBgn0037736,FBgn0037746,FBgn0005777,FBgn0002868,FBgn0037761,FBgn0037749,FBgn0037764,FBgn0085438,FBgn0037757,FBgn0002431,Novel000177,FBgn0266720,FBgn0262104,FBgn0037751,FBgn0037765,FBgn0037760,FBgn0003886,FBgn0037756,FBgn0037750,FBgn0267336,FBgn0037744,FBg…
FBgn0262106	FBgn0042187,FBgn0031413,FBgn0051668,FBgn0031398,FBgn0000097,FBgn0259717,FBgn0031414,FBgn0031395,FBgn0267378,FBgn0031397,FBgn0040715,FBgn0051679,FBgn0010288,FBgn0261523,FBgn0031403,FBgn0031392,FBgn0031410,FBgn0031391,FBgn0264979,FBgn0031407,FBgn0250841,FBgn0031401,FBgn0085201,FBgn0042186,FBgn0031393,FBgn0028570,FBgn0031406,FBgn0011832,FBgn0051681,FBgn0053124,FBgn0085203,FBgn0031412,FBgn0031399,FBg…
FBgn0262108	FBgn0261244,FBgn0030509,FBgn0030528,FBgn0030530,FBgn0030507,FBgn0052625,FBgn0030508,FBgn0001087,FBgn0030529,FBgn0004047,FBgn0030506,FBgn0030510,FBgn0002878,FBgn0030520,FBgn0265726,Novel000205,FBgn0030511,FBgn0030518,FBgn0030521,FBgn0001612,FBgn0003218,FBgn0030519,FBgn0052626,FBgn0030525,FBgn0030524,FBgn0030505,FBgn0030514,Novel000206,FBgn0020909,FBgn0027537,FBgn0030512,FBgn0030522
FBgn0262109	FBgn0262035,FBgn0052476,FBgn0085482,FBgn0063923,FBgn0035107,FBgn0035124,FBgn0085292,FBgn0035131,FBgn0264707,FBgn0035112,FBgn0083976,FBgn0053229,FBgn0035106,FBgn0035101,FBgn0035104,FBgn0085483,FBgn0052845,FBgn0052344,FBgn0035103,FBgn0024806,FBgn0029002,FBgn0004373,FBgn0035109,FBgn0035111,FBgn0027111,FBgn0035122,FBgn0035110,FBgn0035102,FBgn0263988,FBgn0035121,FBgn0035113,FBgn0083992,FBgn0085293,FBg…
FBgn0262142	FBgn0260767,FBgn0085474,FBgn0085475,FBgn0034774,FBgn0050273,FBgn0026261,FBgn0034761,FBgn0034741,FBgn0040091,FBgn0019949,FBgn0050275,FBgn0263030,FBgn0260768,FBgn0053143,FBgn0034743,FBgn0050196,FBgn0034769,FBgn0262141,FBgn0050269,FBgn0020257,FBgn0028371,FBgn0034768,FBgn0050259,FBgn0050195,FBgn0261596,FBgn0260866,FBgn0034750,FBgn0034770,FBgn0034753,FBgn0034748,FBgn0034744,FBgn0034742,FBgn0034740,FBg…
FBgn0262148	FBgn0028952,FBgn0031374,FBgn0003557,FBgn0031378,FBgn0040717,FBgn0053673,FBgn0031377,FBgn0031379,FBgn0031381,FBgn0001125,FBgn0031388,FBgn0053516,FBgn0026396,FBgn0053543,FBgn0040718,FBgn0259230,FBgn0043539,FBgn0031375,FBgn0267972,FBgn0259192,FBgn0031384,FBgn0040719
FBgn0262149	FBgn0037478,FBgn0037482,FBgn0037466,FBgn0086372,FBgn0037469,FBgn0037487,FBgn0250845,FBgn0037472,FBgn0026563,FBgn0011020,FBgn0002306,FBgn0010774,FBgn0037464,FBgn0037473,FBgn0051248,FBgn0037481,FBgn0040670,FBgn0003884,FBgn0037467,Novel000175,FBgn0037485,FBgn0037483,FBgn0051493,FBgn0037470,FBgn0037468,Novel000172,Novel000170,FBgn0037475,FBgn0019828,FBgn0037463,FBgn0037486,FBgn0024289,Novel000171,FBg…
FBgn0262355	FBgn0032624,FBgn0032614,FBgn0265579,FBgn0085342,FBgn0051809,Novel000020,FBgn0032615,FBgn0026150,FBgn0032620,FBgn0261671,FBgn0052832,FBgn0053179,FBgn0051806,FBgn0051810,FBgn0040985,Novel000019,FBgn0032618,FBgn0051805,FBgn0260758
FBgn0262543	FBgn0042129,FBgn0263873,FBgn0032835,FBgn0032827,FBgn0264443,FBgn0032824,FBgn0032833,FBgn0014000,FBgn0054051,FBgn0053117,FBgn0262140,FBgn0032836,FBgn0044811,FBgn0032834
FBgn0262564	FBgn0011743,FBgn0034154,FBgn0024319,FBgn0053544,FBgn0034158,FBgn0010213,FBgn0034151,FBgn0085488,FBgn0259738,FBgn0020506,Novel000095,FBgn0267002,FBgn0024232,FBgn0085218,FBgn0085487,FBgn0259967,FBgn0015584,FBgn0024315,FBgn0034160,FBgn0034152,FBgn0013763,FBgn0034153,Novel000097,FBgn0050463,FBgn0053530,FBgn0040505,FBgn0085486,FBgn0085489,FBgn0034156,FBgn0034157,FBgn0040743,Novel000096,FBgn0034159
FBgn0262604	FBgn0037618,FBgn0037636,FBgn0037638,FBgn0037619,FBgn0046874,FBgn0037616,FBgn0037621,FBgn0037615,FBgn0040532,FBgn0037637,FBgn0037617,FBgn0037620,FBgn0037634,FBgn0037632,FBgn0037627,FBgn0053191,FBgn0037623,FBgn0053189,FBgn0037614,FBgn0085330,FBgn0083971,FBgn0037626,FBgn0262614,FBgn0261015,FBgn0037635,FBgn0037630,FBgn0037624,FBgn0037625,FBgn0037633,FBgn0037622
FBgn0262606	FBgn0026374,FBgn0030686,FBgn0263747,FBgn0030688,FBgn0030680,FBgn0025809,FBgn0030663,FBgn0011741,FBgn0030692,FBgn0026666,FBgn0030685,FBgn0030670,FBgn0003463,FBgn0030678,FBgn0030667,FBgn0030669,FBgn0263748,FBgn0030691,FBgn0027329,FBgn0030671,FBgn0030672,FBgn0030673,FBgn0030666,FBgn0030676,FBgn0030662,FBgn0030674,FBgn0030687,FBgn0030679,FBgn0030665,FBgn0030684,FBgn0030664,FBgn0030675,FBgn0030683,FBg…
FBgn0262620	FBgn0032957,FBgn0086779,Novel000023,FBgn0032949,FBgn0032955,FBgn0016919,FBgn0032961,FBgn0051619,Novel000022,FBgn0032956,FBgn0000559,FBgn0022893,FBgn0023416,Novel000041
FBgn0262622	FBgn0036351,FBgn0036350,FBgn0001256,FBgn0040813,FBgn0259971,FBgn0003034,FBgn0023095,FBgn0036348,FBgn0262623,FBgn0052119,FBgn0259970,FBgn0040814,FBgn0036349
FBgn0262631	FBgn0032949,FBgn0032955,FBgn0053870,FBgn0053873,FBgn0053862,FBgn0032957,FBgn0053865,FBgn0053872,Novel000041,FBgn0023416,FBgn0053861,FBgn0053863,FBgn0053857,FBgn0053869,FBgn0053868,FBgn0053858,FBgn0016919,Novel000023,FBgn0053871,FBgn0053859,FBgn0053866,FBgn0053860,FBgn0000559,FBgn0022893,FBgn0053864,Novel000022,FBgn0032956,FBgn0051619
FBgn0262681	FBgn0035101,FBgn0085483,FBgn0035104,FBgn0035103,FBgn0024806,FBgn0040688,FBgn0035111,FBgn0035109,FBgn0052476,FBgn0262035,FBgn0085482,FBgn0035107,FBgn0063923,FBgn0035106,FBgn0035112,FBgn0083976,FBgn0053229,FBgn0027786,FBgn0000541,FBgn0083992,FBgn0035097,FBgn0024945,FBgn0035120,FBgn0035099,FBgn0025592,FBgn0027587,FBgn0020386,FBgn0002564,FBgn0035110,FBgn0035102,FBgn0263988,FBgn0035113
FBgn0262682	FBgn0052642,FBgn0030437,FBgn0052650,FBgn0030441,FBgn0086675,FBgn0030434,FBgn0259171,FBgn0052643,FBgn0030439,FBgn0030433,FBgn0052644,FBgn0265597,FBgn0030432,FBgn0030435,FBgn0052649,FBgn0030438,FBgn0030443,FBgn0030431,FBgn0030440
FBgn0262687	FBgn0030361,FBgn0263111,FBgn0266019,FBgn0030357,FBgn0030364,FBgn0250871,FBgn0030339,FBgn0030350,FBgn0030351,FBgn0000808,FBgn0030344,FBgn0030362,FBgn0030341,FBgn0260780,FBgn0030358,FBgn0030349,FBgn0030360,FBgn0030348,FBgn0030347,FBgn0030345,FBgn0030352,FBgn0030340,FBgn0030342,FBgn0043001,FBgn0001083,FBgn0003865,FBgn0030359,FBgn0030354,FBgn0030346,FBgn0262686,FBgn0030343,FBgn0030338
FBgn0262690	FBgn0034554,FBgn0034564,FBgn0016984,FBgn0083951,FBgn0008636,FBgn0034567,FBgn0020617,FBgn0053704,FBgn0034566,FBgn0034560,FBgn0040653,FBgn0034570,FBgn0034568,FBgn0034563,FBgn0067905,FBgn0015524,FBgn0011674,FBgn0034552,FBgn0000044,FBgn0034553,FBgn0261394,FBgn0034558,FBgn0034565,FBgn0034569,FBgn0050295
FBgn0262722	FBgn0039228,Novel000188,FBgn0053658,FBgn0039249,FBgn0259233,FBgn0015591,FBgn0039235,FBgn0039233,Novel000187,FBgn0039239,FBgn0039246,FBgn0039241,FBgn0043799,FBgn0039225,FBgn0000140,FBgn0039250,FBgn0051118,FBgn0013949,FBgn0045980,FBgn0039227,FBgn0051105,FBgn0039251,FBgn0004885,FBgn0039237,FBgn0015625,FBgn0039223,FBgn0265189,FBgn0039240,FBgn0039232,FBgn0013953,FBgn0265266,FBgn0051121,FBgn0040600,FBg…
FBgn0262731	FBgn0039909,Novel000198,FBgn0039908,FBgn0026262,Novel000192,FBgn0026869,FBgn0039907,Novel000196,Novel000197,FBgn0004607,Novel000195,FBgn0016126,Novel000194,FBgn0022361,FBgn0262636,FBgn0039904,Novel000193
FBgn0262741	FBgn0039592,FBgn0026400,FBgn0003137,FBgn0039593,FBgn0039588,FBgn0000659,FBgn0001215,FBgn0053346,FBgn0039594,FBgn0039590,FBgn0039585,FBgn0051050,FBgn0013813,FBgn0051051,FBgn0039589,FBgn0039591
FBgn0262822	FBgn0261675,FBgn0031134,FBgn0031139,FBgn0052507,FBgn0031141,FBgn0031132,FBgn0011834,FBgn0261624,FBgn0085387
FBgn0262825	FBgn0261932,Novel000183,FBgn0261046,FBgn0038511,FBgn0000564,FBgn0025456,FBgn0264899,FBgn0262004,FBgn0038499,FBgn0051418,FBgn0053333,FBgn0262005,FBgn0038508,FBgn0262003,FBgn0038504,FBgn0085309,FBgn0262023,FBgn0262024,FBgn0262006,FBgn0262871,FBgn0051419,FBgn0038509,FBgn0038507,FBgn0085308,FBgn0038498,FBgn0038510,FBgn0038505,FBgn0038506,FBgn0028992,FBgn0038512
FBgn0262828	FBgn0261615,FBgn0261849,FBgn0052719,FBgn0262612,FBgn0259098,FBgn0265265,FBgn0029947,FBgn0261616,FBgn0040922,FBgn0040923,FBgn0085366,FBgn0262827,FBgn0052726,FBgn0029949,FBgn0029950,FBgn0029948,FBgn0029941,FBgn0052720
FBgn0262879	FBgn0051683,FBgn0032863,FBgn0262878,FBgn0032857,FBgn0032860,FBgn0054007,FBgn0042175,FBgn0263355,FBgn0051687,FBgn0032859,FBgn0032858,FBgn0032856,FBgn0032864,Novel000021,FBgn0265256
FBgn0262883	FBgn0085461,FBgn0039802,FBgn0039795,FBgn0027598,FBgn0039801,FBgn0039796,FBgn0039797,FBgn0039804,FBgn0051010,FBgn0000274,FBgn0039800,FBgn0051015,FBgn0085462,FBgn0011739,FBgn0039798,FBgn0039799,FBgn0004606
FBgn0262886	FBgn0032972,FBgn0261802,Novel000042,FBgn0084001,FBgn0051702,FBgn0032971,FBgn0051601,FBgn0083973,FBgn0260996,FBgn0032974,FBgn0051703,FBgn0032981,FBgn0032973,FBgn0259683,FBgn0025674,FBgn0040519,FBgn0085202,FBgn0032979
FBgn0262887	Novel000024,FBgn0086683,Novel000043,FBgn0039958,FBgn0250907,FBgn0000384
FBgn0262888	FBgn0053225,FBgn0034651,FBgn0050284,FBgn0069056,FBgn0034639,FBgn0043070,FBgn0004362,FBgn0259708,FBgn0034654,FBgn0034636,FBgn0034655,FBgn0050290,FBgn0050285,FBgn0034644,FBgn0260222,FBgn0259725,FBgn0027360,FBgn0034646,FBgn0259709,FBgn0034649,FBgn0050289,Novel000071,FBgn0034634,FBgn0050288,FBgn0000326,FBgn0259711,FBgn0034642,FBgn0003687,FBgn0003731,FBgn0259726,FBgn0034641,FBgn0260477,FBgn0259710,FBg…
FBgn0262892	FBgn0036492,FBgn0036493,FBgn0036494,FBgn0036495,FBgn0036491,FBgn0029114
FBgn0262895	FBgn0036678,FBgn0036697,FBgn0261547,FBgn0036681,FBgn0010352,FBgn0036698,FBgn0036688,FBgn0036691,FBgn0036687,FBgn0036686,FBgn0036679,FBgn0011293,FBgn0036684,FBgn0036695,FBgn0036690,FBgn0036680,FBgn0010424,FBgn0036696,FBgn0036685,FBgn0261872,FBgn0260943,FBgn0036689
FBgn0262897	FBgn0001077,FBgn0260642,FBgn0003339
FBgn0262898	FBgn0262100,Novel000131,FBgn0036775,FBgn0003997,FBgn0259739,FBgn0264747,FBgn0052195,FBgn0264746,FBgn0036773,FBgn0002901,FBgn0052192,Novel000130,FBgn0264748,FBgn0000568,FBgn0020300,FBgn0036778,FBgn0036777,FBgn0036774,FBgn0085282,FBgn0036780,FBgn0036781
FBgn0262901	FBgn0033010,FBgn0033005,FBgn0053554,FBgn0013348,FBgn0026238,Novel000085,Novel000086
FBgn0262903	FBgn0051221,FBgn0038702,FBgn0038706,FBgn0038697,FBgn0038705,FBgn0038694,FBgn0000463,FBgn0038704,FBgn0051245,FBgn0038692,FBgn0038701,FBgn0265063,FBgn0051404,FBgn0262839,FBgn0038693,FBgn0086613,FBgn0051244,FBgn0038700,FBgn0038695
FBgn0262904	FBgn0259146,FBgn0039381,FBgn0039373,FBgn0039379,FBgn0040602,FBgn0250831,FBgn0039398,FBgn0261061,FBgn0250757,FBgn0051091,FBgn0002734,FBgn0011273,FBgn0039385,FBgn0002733,FBgn0039378,FBgn0039386,FBgn0011669,FBgn0262576,FBgn0039376,FBgn0000206,FBgn0039387,FBgn0027865,FBgn0051089,FBgn0002735,FBgn0015269,FBgn0039395,FBgn0011670,FBgn0028717,FBgn0039380,FBgn0011668,FBgn0039396,FBgn0039374
FBgn0262905	FBgn0052532,FBgn0031030,FBgn0031022,FBgn0031021,FBgn0031023,FBgn0031020,FBgn0026430,FBgn0031018,FBgn0027621,FBgn0044030,FBgn0031031,FBgn0000257,FBgn0027291,FBgn0052533,FBgn0031026,FBgn0031016,FBgn0261573,FBgn0020261,FBgn0031032,FBgn0040890
FBgn0262943	FBgn0031996,FBgn0032010,FBgn0264953,FBgn0032023,FBgn0032017,FBgn0032014,FBgn0032015,FBgn0261064,FBgn0031999,FBgn0032013,FBgn0051606,FBgn0031997,FBgn0031992,FBgn0032001,FBgn0032018,FBgn0261020,FBgn0003607,FBgn0263256,FBgn0032002,FBgn0032020,FBgn0031995,FBgn0032004,FBgn0261831,FBgn0083970,FBgn0032016,FBgn0028987,FBgn0032003,FBgn0032008,FBgn0032006,FBgn0032022,FBgn0031990,FBgn0032021,FBgn0032000,FBg…
FBgn0262944	FBgn0024314,FBgn0259229,FBgn0031327,FBgn0031319,FBgn0263081,FBgn0031308,FBgn0031305,FBgn0261458,FBgn0031312,FBgn0031321,FBgn0040723,FBgn0041097,FBgn0031309,FBgn0016926,FBgn0031323,FBgn0031317,FBgn0031314,FBgn0031304,FBgn0031310,FBgn0263080,FBgn0031318,FBgn0031320,FBgn0051922,FBgn0031315,FBgn0031313,FBgn0031324,FBgn0031307,FBgn0031322,FBgn0031306
FBgn0262945	FBgn0029821,FBgn0029824,FBgn0029798,FBgn0261383,FBgn0014340,FBgn0029801,FBgn0029823,FBgn0262611,FBgn0029814,FBgn0259149,FBgn0029822,FBgn0029800,FBgn0262610,FBgn0029816,FBgn0029799,FBgn0029819,FBgn0265417,FBgn0013987,FBgn0029809,FBgn0261610,FBgn0029804,FBgn0029820,FBgn0029807,FBgn0029811,FBgn0052758,FBgn0029818,FBgn0029817,FBgn0029812,FBgn0029813,FBgn0029795,FBgn0000042,FBgn0029810
FBgn0262963	FBgn0262960,FBgn0023096,FBgn0032658,FBgn0040989,FBgn0261358,FBgn0051742,FBgn0032656,FBgn0032660,FBgn0243486,FBgn0262018,FBgn0261357,FBgn0261531,FBgn0051740
FBgn0262967	FBgn0262612,FBgn0052719,FBgn0259098,FBgn0265265,FBgn0261615,FBgn0261616,FBgn0029952,FBgn0085366,FBgn0040923,FBgn0040922,FBgn0029941,FBgn0052720,FBgn0029951,FBgn0052726,FBgn0262827,FBgn0029949,FBgn0029950
FBgn0262968	FBgn0040923,FBgn0085366,FBgn0040922,FBgn0052726,FBgn0262827,FBgn0029949,FBgn0029950,FBgn0029941,FBgn0052720,FBgn0029951,FBgn0261615,FBgn0259098,FBgn0262612,FBgn0052719,FBgn0265265,FBgn0261616,FBgn0029952
FBgn0262969	FBgn0028415,FBgn0036789,FBgn0011706,FBgn0036786,FBgn0036787,FBgn0028416,FBgn0052196,FBgn0052198
FBgn0262971	FBgn0038741,FBgn0038737,FBgn0002940,FBgn0038746,FBgn0038760,FBgn0038738,FBgn0038749,FBgn0051459,FBgn0038751,FBgn0261984,FBgn0038750,FBgn0014006,FBgn0014135,FBgn0051213,FBgn0038752,FBgn0260234,FBgn0270925,FBgn0038745,FBgn0038747,FBgn0038742,FBgn0021776,FBgn0038763,FBgn0038756,FBgn0038740,FBgn0038761,FBgn0038739,FBgn0038735,FBgn0038755,FBgn0038744,FBgn0038753
FBgn0262972	FBgn0037870,FBgn0040259,FBgn0037891,FBgn0026314,FBgn0037885,FBgn0037883,FBgn0037873,FBgn0004595,FBgn0037875,FBgn0040251,FBgn0037879,FBgn0037884,FBgn0051388,FBgn0037878,FBgn0037876,FBgn0037889,FBgn0086472,FBgn0037882,FBgn0037880,FBgn0051441,FBgn0037890,FBgn0261808,FBgn0027584,FBgn0037877,FBgn0020910,FBgn0026064,FBgn0037881,FBgn0026063,FBgn0040253,FBgn0026315,FBgn0037874,FBgn0037888,FBgn0040257,FBg…
FBgn0262974	FBgn0085384,FBgn0039118,FBgn0028475,FBgn0028691,FBgn0039113,FBgn0039116,FBgn0039112,FBgn0260634,FBgn0015513,FBgn0025574,FBgn0039109,FBgn0039115,FBgn0039124,Novel000186,FBgn0039114,FBgn0016754,FBgn0039110,FBgn0263782,FBgn0013347,FBgn0039120,FBgn0039111,FBgn0028684,FBgn0039125,FBgn0051141,FBgn0039117,FBgn0053111
FBgn0262979	FBgn0004198,FBgn0029957,FBgn0029958,FBgn0029959,FBgn0029504,FBgn0052718,FBgn0016041,FBgn0029955,FBgn0029961,FBgn0027553,FBgn0022786,FBgn0085367
FBgn0262981	FBgn0259231,FBgn0030941,FBgn0030936,FBgn0030945,FBgn0030944,FBgn0265598,FBgn0030947,FBgn0030943,FBgn0010383,FBgn0030940,FBgn0001079,FBgn0030937,FBgn0030946,FBgn0030949,FBgn0004959,FBgn0027335,FBgn0030938
FBgn0262989	FBgn0030056,FBgn0030061,FBgn0030055,FBgn0027864,FBgn0027330,FBgn0030058,FBgn0030057,FBgn0041629,FBgn0004102,FBgn0026411,FBgn0030063,FBgn0030060
FBgn0262990	FBgn0052786,FBgn0263772,FBgn0029687,FBgn0029688,FBgn0029693,FBgn0029686,FBgn0052783,FBgn0029690,FBgn0029685,FBgn0260658,FBgn0029694,FBgn0029689
FBgn0262992	FBgn0259731,FBgn0259721,FBgn0259732,FBgn0038181,FBgn0000454,FBgn0051495,FBgn0038186,FBgn0008646,FBgn0259730,FBgn0266464,FBgn0085412,FBgn0038183,FBgn0259733,FBgn0038180,FBgn0260464,FBgn0002862,FBgn0038179,FBgn0000576
FBgn0262993	FBgn0266410,FBgn0000412,FBgn0260237,FBgn0037678,FBgn0037687,FBgn0037670,FBgn0261552,FBgn0037690,FBgn0037671,FBgn0000723,FBgn0037680,FBgn0037685,FBgn0263750,FBgn0011740,FBgn0037688,FBgn0037669,FBgn0010803,FBgn0261241,FBgn0037676,FBgn0037665,FBgn0037668,FBgn0037684,FBgn0037677,FBgn0037683,FBgn0037689,FBgn0260935,FBgn0037667,Novel000176,FBgn0037675,FBgn0037686,FBgn0037664,FBgn0003889,FBgn0265201,FBg…
FBgn0262994	FBgn0037556,FBgn0051464,FBgn0261290,FBgn0037561,FBgn0037565,FBgn0051463,FBgn0037554,FBgn0037550,FBgn0037548,FBgn0260386,FBgn0037562,FBgn0014861,FBgn0037555,FBgn0037549,FBgn0040528,FBgn0001138,FBgn0064126,FBgn0010173,FBgn0037553,FBgn0243512,FBgn0037552,FBgn0037551,FBgn0037563,FBgn0010433,FBgn0042182
FBgn0262995	FBgn0064126,FBgn0001138,FBgn0010173,FBgn0037553,FBgn0037549,FBgn0040528,FBgn0010433,FBgn0042182,FBgn0243512,FBgn0037552,FBgn0037551,FBgn0037563,FBgn0261290,FBgn0037561,FBgn0037566,FBgn0037556,FBgn0051464,FBgn0037550,FBgn0037554,FBgn0037548,FBgn0014861,FBgn0037562,FBgn0260386,FBgn0037555,FBgn0037565,FBgn0051463
FBgn0262996	FBgn0032648,FBgn0003187,FBgn0000183,FBgn0027885,FBgn0260632,FBgn0032645,FBgn0032652,FBgn0032637,FBgn0032646,FBgn0032640,FBgn0032651,FBgn0032639,FBgn0262857,FBgn0032654,FBgn0024689,FBgn0262356,FBgn0263654,FBgn0032644,FBgn0032643,FBgn0032649,FBgn0032647,FBgn0261089,FBgn0032650,FBgn0013810,FBgn0032642,FBgn0032638,FBgn0262856
FBgn0262998	FBgn0036785,FBgn0036782,FBgn0036784,FBgn0036783,FBgn0015946
FBgn0263001	FBgn0037134,FBgn0037125,FBgn0052448,FBgn0037133,FBgn0037130,FBgn0037122,FBgn0037124,FBgn0037126,FBgn0037128,FBgn0264487,FBgn0037131,FBgn0037137,FBgn0037135,FBgn0046301,FBgn0037138,FBgn0037139,FBgn0037127,FBgn0262737,FBgn0037123,FBgn0000560,FBgn0037129,FBgn0037121,FBgn0022936
FBgn0263085	FBgn0263094,FBgn0051787,FBgn0263086,FBgn0051788,FBgn0085200,FBgn0261804,FBgn0032677,FBgn0011559,FBgn0000636,FBgn0051802,FBgn0261057
FBgn0263088	FBgn0032415,FBgn0051760,FBgn0051759,FBgn0028707,FBgn0027081,FBgn0029137,FBgn0000114,FBgn0015797,FBgn0263234,FBgn0032420,FBgn0032407,FBgn0032406,FBgn0032416,FBgn0032414,FBgn0032421,FBgn0003145,FBgn0051861,FBgn0051860,FBgn0032409,FBgn0263235,FBgn0032422,FBgn0032408,FBgn0032419
FBgn0263089	FBgn0262875,FBgn0045842,FBgn0027559,FBgn0028853,FBgn0028516,FBgn0028852,FBgn0028888,FBgn0001978,FBgn0261268,FBgn0086691,FBgn0028850,FBgn0011239,FBgn0028878,FBgn0259965,FBgn0028862,FBgn0259982
FBgn0263090	FBgn0085200,FBgn0261804,FBgn0051802,FBgn0261057,FBgn0011559,FBgn0032677,FBgn0000636,FBgn0263094,FBgn0051787,FBgn0263086,FBgn0051788
FBgn0263095	FBgn0032811,FBgn0032803,FBgn0032782,FBgn0003732,FBgn0032790,FBgn0005672,FBgn0002044,FBgn0032814,FBgn0032788,FBgn0000964,FBgn0032789,FBgn0032797,FBgn0024230,FBgn0032791,FBgn0051697,FBgn0032800,FBgn0264845,FBgn0000464,FBgn0003346,FBgn0041180,FBgn0053533,FBgn0032780,FBgn0032781,FBgn0016675,FBgn0032813,FBgn0053532,FBgn0032796,FBgn0032812,FBgn0032798,FBgn0003231,FBgn0032793,FBgn0032785,FBgn0032804,FBg…
FBgn0263130	FBgn0008651,FBgn0002941,FBgn0038890,FBgn0038889,FBgn0011278,FBgn0038892,FBgn0011766,FBgn0013984,FBgn0004863
FBgn0263217	FBgn0259194,FBgn0264326,FBgn0039077,FBgn0039075,FBgn0039071,FBgn0039080,FBgn0039078,FBgn0051225,FBgn0051515,FBgn0002622,FBgn0263777,FBgn0039079,FBgn0016119,FBgn0259193,FBgn0262009,FBgn0003118,FBgn0024509,FBgn0262010,FBgn0039073
FBgn0263290	FBgn0010434,FBgn0034415,FBgn0004168,FBgn0000578,FBgn0027535,FBgn0263395,FBgn0034419,FBgn0034418,FBgn0034417,FBgn0034420,FBgn0050125,FBgn0034416,FBgn0034422
FBgn0263323	FBgn0032119,FBgn0032117,FBgn0032110,FBgn0262036,FBgn0011232,FBgn0012036,FBgn0032115,FBgn0085211,FBgn0053723,FBgn0032109,FBgn0267252,FBgn0010314,FBgn0032111,FBgn0000640,FBgn0026439,FBgn0085395,FBgn0085210,FBgn0032116,FBgn0002973,FBgn0263082
FBgn0263324	FBgn0005778,FBgn0025573,FBgn0050401,FBgn0041238,FBgn0034667,FBgn0085399,FBgn0034674,FBgn0041237,FBgn0034671,FBgn0085398,FBgn0034681,FBgn0085397,FBgn0034666,FBgn0263999,FBgn0041239,FBgn0034670,FBgn0054029
FBgn0263325	FBgn0000636,FBgn0032671,FBgn0032677,FBgn0261057,FBgn0051802,FBgn0032668,FBgn0261804,FBgn0041184,FBgn0032669,FBgn0051788,FBgn0032670,FBgn0263086,FBgn0051787,FBgn0267486,FBgn0263094
FBgn0263327	FBgn0261057,FBgn0051802,FBgn0032671,FBgn0000636,FBgn0011559,FBgn0032677,FBgn0261804,FBgn0051788,FBgn0263086,FBgn0051787,FBgn0263094,FBgn0267486,FBgn0032670
FBgn0263328	FBgn0032358,FBgn0040232,FBgn0000287,FBgn0259822,FBgn0032359,FBgn0020270,FBgn0040233,FBgn0264442,FBgn0052831,FBgn0032360
FBgn0263329	FBgn0028527,FBgn0028847,FBgn0028546,FBgn0032530,FBgn0051814,FBgn0028848,FBgn0028943,FBgn0028942,FBgn0028513,FBgn0023407,FBgn0053645,FBgn0259984,FBgn0028941
FBgn0263330	FBgn0053648,FBgn0028855,FBgn0250844,FBgn0028913,FBgn0000056,FBgn0003016,FBgn0261566,FBgn0000055
FBgn0263331	FBgn0051823,FBgn0045827,FBgn0028857,FBgn0028856,FBgn0028644,FBgn0051821,FBgn0051735,FBgn0028514,FBgn0041183,FBgn0051820,FBgn0266459,FBgn0032577,FBgn0264364,FBgn0028858,FBgn0013433,FBgn0000182,FBgn0028645,FBgn0085196
FBgn0263333	FBgn0260000,FBgn0259998,FBgn0032856,Novel000040,FBgn0040996,FBgn0011638,FBgn0032857,FBgn0003475,FBgn0026756,FBgn0015803
FBgn0263334	FBgn0034082,FBgn0034076,FBgn0034075,FBgn0001124,FBgn0050095,FBgn0034057,FBgn0034071,FBgn0265605,FBgn0034062,FBgn0027091,FBgn0034085,FBgn0034083,FBgn0083983,FBgn0034068,FBgn0034063,FBgn0034069,FBgn0010052,FBgn0034073,FBgn0029175,FBgn0086676,FBgn0050094,FBgn0034060,FBgn0034066,FBgn0034084,FBgn0034059,FBgn0020236,FBgn0034058,FBgn0034061,FBgn0034067,FBgn0010590,FBgn0034070,FBgn0034072,FBgn0265045,FBg…
FBgn0263335	FBgn0034120,FBgn0050096,FBgn0262511,FBgn0029154,FBgn0034118,FBgn0053017,FBgn0034105,FBgn0034113,FBgn0050100,FBgn0262560,FBgn0034110,FBgn0034109,FBgn0034103,FBgn0261612,FBgn0085428,FBgn0050099,FBgn0034106,FBgn0025519,FBgn0029153,FBgn0001308,FBgn0028424,FBgn0034129,FBgn0264273,FBgn0015925,FBgn0034114,FBgn0034122,FBgn0034117,FBgn0034104,FBgn0050098,FBgn0024249,FBgn0034126,FBgn0034127,FBgn0050324,FBg…
FBgn0263337	FBgn0034403,FBgn0262569,FBgn0034396,FBgn0034390,FBgn0053998,FBgn0262481,FBgn0034406,FBgn0010551,FBgn0259682,FBgn0010053,FBgn0034391,FBgn0010651,FBgn0034392,FBgn0034383,FBgn0034401,FBgn0034407,FBgn0262480,FBgn0262479,FBgn0034382,FBgn0034408,FBgn0034381,FBgn0034402,FBgn0004240,FBgn0034399,FBgn0034394,FBgn0053147,FBgn0034405,FBgn0034398,FBgn0034400,FBgn0034387,FBgn0034397,FBgn0034389,FBgn0028669
FBgn0263338	FBgn0262017,FBgn0015609,FBgn0262876,FBgn0262018
FBgn0263339	FBgn0262017,FBgn0051742,FBgn0032656,FBgn0032658,FBgn0023096,FBgn0262018,FBgn0262960
FBgn0263340	Novel000069,FBgn0034478,FBgn0265833,FBgn0034479,FBgn0261581,FBgn0265834,FBgn0034480,FBgn0050447,FBgn0265762,FBgn0034477,FBgn0043532,FBgn0261580,FBgn0262824
FBgn0263341	FBgn0034710,FBgn0034713,FBgn0025186,FBgn0034716,FBgn0034712,FBgn0017482,FBgn0085237,FBgn0013272,FBgn0085236,FBgn0034720,FBgn0034709,FBgn0016053,FBgn0034722,FBgn0034718,FBgn0020307,FBgn0034717,FBgn0050277,FBgn0025878,FBgn0034715,FBgn0034711,FBgn0034723,FBgn0034721,FBgn0050278
FBgn0263342	FBgn0035143,FBgn0035155,FBgn0035151,Novel000127,FBgn0035148,Novel000126,FBgn0035153,FBgn0035159,FBgn0035154,FBgn0035150,FBgn0035145,FBgn0035149,FBgn0035141,Novel000128,FBgn0035152,FBgn0025676,FBgn0035140,FBgn0035147,FBgn0035158,FBgn0035160,FBgn0052483,FBgn0035144,FBgn0035157,FBgn0016715,FBgn0001316,FBgn0035142,FBgn0260862,FBgn0035146,FBgn0263042
FBgn0263343	FBgn0037288,FBgn0037291,FBgn0004913,FBgn0004436,FBgn0010313,FBgn0037292,Novel000141,FBgn0265082,FBgn0037290,FBgn0250839
FBgn0263344	FBgn0039932,FBgn0039939,FBgn0039938,FBgn0052016,FBgn0023213,FBgn0039937,FBgn0039923,FBgn0039936,FBgn0019985,FBgn0025726,FBgn0005666
FBgn0263376	FBgn0033963,FBgn0015602,FBgn0033952,FBgn0033960,FBgn0010388,FBgn0033958,FBgn0033955,FBgn0001319,FBgn0028689,FBgn0050476,FBgn0262881,FBgn0033969,FBgn0050479,FBgn0020767,FBgn0266723,FBgn0033970,FBgn0033968,FBgn0012042,FBgn0033961,FBgn0033954,FBgn0033950,FBgn0050480,Novel000094,FBgn0033951,FBgn0041581,FBgn0020269,FBgn0033953
FBgn0263379	FBgn0036305,FBgn0052112,FBgn0036302,FBgn0015919,FBgn0014007,FBgn0015904,FBgn0052109,Novel000104,FBgn0261933,FBgn0014343,FBgn0010235
FBgn0263380	FBgn0036465,FBgn0263761,FBgn0036468,FBgn0036474,FBgn0040487,FBgn0036467,FBgn0026320,FBgn0086690,FBgn0263762,FBgn0002778,FBgn0047338,FBgn0023174,FBgn0085274,FBgn0025776,FBgn0036459,FBgn0040296,FBgn0036462,FBgn0036471,FBgn0036460,FBgn0261090,FBgn0036461,FBgn0036466,FBgn0036469,FBgn0263763,FBgn0040809,FBgn0036454,FBgn0000216,FBgn0036463,FBgn0259099,FBgn0036470
FBgn0263381	FBgn0260943,FBgn0036702,FBgn0036704,FBgn0036705,Novel000106,FBgn0036703
FBgn0263382	FBgn0085320,FBgn0263118,FBgn0039428,FBgn0039421,FBgn0042711,FBgn0040606,FBgn0023178,FBgn0039431,FBgn0039424,FBgn0042710,FBgn0053970,FBgn0039430,FBgn0039427,FBgn0039425,FBgn0262577,FBgn0039429
FBgn0263383	FBgn0000439,FBgn0000071,FBgn0085326,FBgn0003339,FBgn0004781,FBgn0000552,FBgn0000166,FBgn0004777,FBgn0002522,FBgn0004778,FBgn0004053,FBgn0004780,FBgn0004782,FBgn0001077,FBgn0004779,FBgn0051481,FBgn0004783,FBgn0004054
FBgn0263384	FBgn0039881,FBgn0039869,FBgn0000150,FBgn0039876,Novel000164,FBgn0250755,FBgn0039868,FBgn0039867,FBgn0266268,FBgn0039879,FBgn0011224,FBgn0261479,FBgn0039873,FBgn0039875,FBgn0261583,FBgn0039877,FBgn0027620,FBgn0017448,FBgn0039870,FBgn0022349,FBgn0039882,FBgn0039872,FBgn0039864,FBgn0270927,FBgn0003870,FBgn0000557,FBgn0005632,FBgn0039883,FBgn0003065,FBgn0039863
FBgn0263385	Novel000195,Novel000197,Novel000196,FBgn0004607,Novel000193,FBgn0039904,Novel000194,FBgn0016126,FBgn0262636,Novel000192,FBgn0039908,FBgn0052850,Novel000198,FBgn0026262,FBgn0259214,FBgn0039907
FBgn0263388	FBgn0051050,FBgn0039588,FBgn0039593,FBgn0003137,FBgn0039592,FBgn0026400,FBgn0000659,FBgn0051051,FBgn0013813,FBgn0039590,FBgn0039594,FBgn0053346,FBgn0039591,FBgn0001215,FBgn0039589
FBgn0263405	FBgn0051245,FBgn0038690,FBgn0000463,FBgn0038694,FBgn0038691,FBgn0038697,FBgn0267975,FBgn0025680,FBgn0038700,FBgn0038695,FBgn0086613,FBgn0051475,FBgn0038693,FBgn0262839,FBgn0265063,FBgn0051404,FBgn0038692,Novel000184
FBgn0263406	FBgn0038826,FBgn0001169,FBgn0038820,FBgn0054008,FBgn0028422,FBgn0046689,FBgn0023212,FBgn0038810,FBgn0259222,FBgn0038818,FBgn0051205,FBgn0004107,FBgn0038808,FBgn0014029,FBgn0038814,FBgn0023097,FBgn0038819,FBgn0024944,FBgn0038811,FBgn0038821,FBgn0265606,FBgn0038809,FBgn0051195,FBgn0038816,FBgn0051201,FBgn0051200,FBgn0038815,FBgn0051199,FBgn0015279
FBgn0263407	FBgn0261845,FBgn0261841,FBgn0008651,FBgn0267651,FBgn0267652,FBgn0004862,FBgn0261842,FBgn0004863,FBgn0051438,FBgn0267650,FBgn0004110,FBgn0011278,FBgn0261844,FBgn0002781,FBgn0002941,FBgn0038890,FBgn0261843,FBgn0261840,FBgn0038887,FBgn0261839,FBgn0038889,FBgn0038888,FBgn0038886
FBgn0263408	FBgn0039054,FBgn0039041,FBgn0039043,FBgn0041225,FBgn0039042,FBgn0039031,FBgn0039033,FBgn0039052,FBgn0039050,FBgn0263390,FBgn0039045,FBgn0039051,FBgn0027526,FBgn0053193,FBgn0085404,FBgn0039038,FBgn0039049,FBgn0039030,FBgn0039048,FBgn0039039,FBgn0017590,FBgn0039040,FBgn0051281,FBgn0039044,FBgn0039034
FBgn0263409	FBgn0039198,FBgn0039205,FBgn0039184,FBgn0039193,FBgn0053341,FBgn0039188,FBgn0004118,FBgn0039196,FBgn0262167,FBgn0039207,FBgn0000039,FBgn0039199,FBgn0039202,FBgn0039192,FBgn0039186,FBgn0261993,FBgn0086610,FBgn0011581,FBgn0003134,FBgn0039190,FBgn0053340,FBgn0039189,FBgn0039197,FBgn0039195,FBgn0051128,FBgn0000036,FBgn0053339,FBgn0039187,FBgn0039201,FBgn0039204,FBgn0039200,FBgn0261994,FBgn0039203,FBg…
FBgn0263410	FBgn0039335,FBgn0040212,FBgn0039339,FBgn0039342,FBgn0004509,FBgn0039336,FBgn0011666,FBgn0039344,FBgn0039343,FBgn0039341,FBgn0259991,FBgn0039337,FBgn0261287,FBgn0053494,FBgn0039338
FBgn0263411	FBgn0039339,FBgn0039335,FBgn0040212,FBgn0004509,FBgn0039342,FBgn0039336,FBgn0011666,FBgn0039344,FBgn0039343,FBgn0259991,FBgn0039341,FBgn0261287,FBgn0039338,FBgn0053494,FBgn0039337
FBgn0263412	FBgn0053920,FBgn0039827,FBgn0051004,FBgn0086704,FBgn0053773,FBgn0004389,FBgn0039818,FBgn0002413,FBgn0039831,FBgn0039829,FBgn0039816,FBgn0039817,FBgn0039821,FBgn0016123,FBgn0039828,FBgn0039820,FBgn0024288,FBgn0261395,FBgn0010808,FBgn0267435,FBgn0013973,FBgn0039833,FBgn0039830,FBgn0010015,FBgn0039832,FBgn0061476
FBgn0263413	FBgn0004575,FBgn0053630,FBgn0051410,FBgn0267336,FBgn0028734,FBgn0053784,FBgn0266721,FBgn0053783,FBgn0037781,Novel000179,FBgn0051477,FBgn0001321,FBgn0037782,FBgn0053208,FBgn0037773,FBgn0261817,FBgn0004889,FBgn0037772,FBgn0037794,FBgn0053631,FBgn0041105,Novel000178,FBgn0040238,FBgn0085332,FBgn0037777,FBgn0037796,FBgn0051407,Novel000146,FBgn0037792,FBgn0037778,FBgn0037786,FBgn0037783,FBgn0037788,Nov…
FBgn0263414	FBgn0038190,Novel000149,FBgn0038189,FBgn0000576,FBgn0038195,FBgn0016672,FBgn0015270,FBgn0038194,FBgn0264493,FBgn0038191,FBgn0038197,FBgn0008646,FBgn0047199,FBgn0038196,Novel000150,FBgn0038188
FBgn0263415	FBgn0029881,FBgn0029890,FBgn0029905,FBgn0029897,FBgn0029502,FBgn0028336,FBgn0029909,FBgn0263968,FBgn0029887,FBgn0086693,FBgn0029892,FBgn0029895,FBgn0029894,FBgn0029903,FBgn0265362,FBgn0062413,FBgn0029907,FBgn0029899,FBgn0259228,FBgn0029898,FBgn0029891,FBgn0029893,FBgn0029888,FBgn0028360,FBgn0003390,FBgn0029882,FBgn0029896,FBgn0029880,FBgn0025815,FBgn0029885,FBgn0029906
FBgn0263452	FBgn0051151,FBgn0038986,FBgn0053099,FBgn0051158,FBgn0039002,FBgn0039013,FBgn0039008,FBgn0038983,FBgn0039010,FBgn0038993,FBgn0263986,FBgn0260942,FBgn0024958,Novel000156,FBgn0051159,FBgn0014949,FBgn0051161,FBgn0028837,FBgn0039009,FBgn0039003,FBgn0039004,FBgn0038989,FBgn0266418,Novel000157,FBgn0020278,FBgn0053110,FBgn0039007,FBgn0051156,FBgn0039006,FBgn0038984,FBgn0266409,FBgn0046114,FBgn0053107,FBg…
FBgn0263492	FBgn0035981,FBgn0001226,FBgn0005533,FBgn0035993,FBgn0260431,FBgn0015296,FBgn0040305,FBgn0035978,FBgn0035975,FBgn0035982,FBgn0035999,FBgn0001224,FBgn0266101,Novel000103,FBgn0264000,FBgn0035987,FBgn0011327,FBgn0035985,FBgn0035989,FBgn0266124,FBgn0035998,FBgn0035986,FBgn0260859,FBgn0052040,FBgn0001227,FBgn0036004,FBgn0015218,FBgn0001229,FBgn0001225,FBgn0085485,FBgn0036000,FBgn0035983,FBgn0035995,FBg…
FBgn0263495	FBgn0035453,FBgn0262544,FBgn0040694,FBgn0052264,FBgn0005640,FBgn0263239,FBgn0035452,FBgn0035455,FBgn0262535,FBgn0035458
FBgn0263496	FBgn0035452,FBgn0263239,FBgn0005640,FBgn0052264,FBgn0040694,FBgn0262544,FBgn0035453,FBgn0035458,FBgn0262535,FBgn0035455,FBgn0052266
FBgn0263497	FBgn0037396,FBgn0026077,FBgn0037399,FBgn0051559,FBgn0037405,FBgn0037410,FBgn0037398,FBgn0046875,FBgn0037411,FBgn0046878,FBgn0037412,FBgn0037409,FBgn0037406,FBgn0046876,FBgn0037402,FBgn0037408
FBgn0263498	FBgn0037398,FBgn0046875,FBgn0037410,FBgn0037405,FBgn0037408,FBgn0037402,FBgn0046876,FBgn0037412,FBgn0037409,FBgn0037406,FBgn0037411,FBgn0046878,FBgn0037413,FBgn0037396,FBgn0037399,FBgn0051559,FBgn0026077
FBgn0263499	FBgn0038733,FBgn0038722,FBgn0051219,FBgn0014135,FBgn0038731,FBgn0038727,FBgn0038723,FBgn0051459,FBgn0038734,FBgn0038730,FBgn0024963,FBgn0038732,FBgn0051220,FBgn0051216,FBgn0026753,FBgn0085315,FBgn0038725,FBgn0003011
FBgn0263500	FBgn0051418,FBgn0038499,FBgn0038498,FBgn0051262,FBgn0265197,FBgn0051419,Novel000183,FBgn0262871,FBgn0038494,FBgn0265199,FBgn0038492
FBgn0263501	FBgn0051419,FBgn0265197,FBgn0051262,FBgn0038492,FBgn0265199,Novel000183,FBgn0262871,FBgn0038494,FBgn0038498,FBgn0051418,FBgn0038499
FBgn0263502	FBgn0024238,FBgn0263706,FBgn0040877,FBgn0030839,FBgn0030837,FBgn0027602,FBgn0030836,FBgn0030840,FBgn0030838,FBgn0004854,FBgn0030841,FBgn0262111,FBgn0011758
FBgn0263503	FBgn0030932,FBgn0030944,FBgn0027087,FBgn0030947,FBgn0030928,FBgn0030943,FBgn0030927,FBgn0265598,FBgn0001079,FBgn0030930,FBgn0030940,FBgn0030937,FBgn0030933,FBgn0004959,FBgn0030946,FBgn0027335,FBgn0030938,FBgn0010194,FBgn0030941,FBgn0030931,FBgn0030936,FBgn0030945,FBgn0030929,FBgn0030926
FBgn0263504	FBgn0031189,FBgn0031194,FBgn0031190,FBgn0031184,FBgn0052499,FBgn0031187,FBgn0262866,FBgn0031195,FBgn0014395,FBgn0031183,FBgn0031191,FBgn0031197,FBgn0027279,FBgn0266848,FBgn0031188,FBgn0031196
FBgn0263505	FBgn0011276,FBgn0024975,FBgn0000927,FBgn0000520,FBgn0000092,FBgn0003068,FBgn0000376,FBgn0024993,FBgn0024977,FBgn0024995,FBgn0024980,FBgn0040384,FBgn0040356,FBgn0024998,FBgn0025838,FBgn0250874,FBgn0003371,FBgn0024997,FBgn0024992,FBgn0024991,FBgn0003996,FBgn0024994,FBgn0024973,FBgn0000928,FBgn0024996,FBgn0028369
FBgn0263506	FBgn0266000,FBgn0260971,FBgn0029725,FBgn0029730,FBgn0029737,FBgn0029729,FBgn0004368,FBgn0061196,FBgn0029727,FBgn0029733,FBgn0052772,FBgn0029736,Novel000217,FBgn0029726,FBgn0029728
FBgn0263507	FBgn0029885,FBgn0029913,FBgn0029896,FBgn0029915,FBgn0029888,FBgn0003390,FBgn0259228,FBgn0029903,FBgn0265362,FBgn0029895,FBgn0086693,FBgn0029887,FBgn0029909,FBgn0263968,FBgn0029897,FBgn0029906,FBgn0025815,FBgn0029911,FBgn0029893,FBgn0028360,FBgn0029898,FBgn0029891,FBgn0029899,FBgn0062413,FBgn0029907,FBgn0029894,FBgn0029892,FBgn0028336,FBgn0029912,FBgn0029502,FBgn0029914,FBgn0029890,FBgn0029905
FBgn0263509	FBgn0052698,FBgn0020378,FBgn0030148,FBgn0000233,FBgn0030151,FBgn0028341,FBgn0261617
FBgn0263581	FBgn0026756,FBgn0015803,FBgn0040996,FBgn0011638,FBgn0032857,FBgn0003475,FBgn0032858,FBgn0032859,FBgn0259998,FBgn0260000,FBgn0032856
FBgn0263582	FBgn0032857,FBgn0042175,FBgn0054007,FBgn0026756,FBgn0051683,FBgn0032856,FBgn0265256,FBgn0032859,FBgn0051687,FBgn0032858,FBgn0011638,FBgn0003475,FBgn0262878,FBgn0263355,FBgn0032860,FBgn0015803,FBgn0032863,Novel000021,FBgn0032864
FBgn0263583	FBgn0032867,FBgn0014859,FBgn0032876,FBgn0261058,FBgn0032871,FBgn0051678,FBgn0032868,FBgn0042133,FBgn0016054,FBgn0051677,FBgn0032869,FBgn0032877,FBgn0086657,FBgn0051680,FBgn0265256,FBgn0261787,FBgn0032873,FBgn0032870
FBgn0263585	FBgn0031860,FBgn0031866,FBgn0031861,FBgn0051632,FBgn0031857,FBgn0031850,FBgn0031858,FBgn0031854,FBgn0031855,FBgn0086451,FBgn0265257,FBgn0017551,FBgn0025777,FBgn0015777,FBgn0025595,FBgn0031865,FBgn0051910,FBgn0031851,FBgn0031856,FBgn0015776,FBgn0046704,FBgn0031859,FBgn0042189,FBgn0031853
FBgn0263586	FBgn0033095,FBgn0050443,FBgn0000473,FBgn0262736,FBgn0050446,FBgn0014028,FBgn0033079,FBgn0033089,FBgn0033092,FBgn0010482,FBgn0259483,FBgn0033093,FBgn0033088,FBgn0259977,FBgn0033085,FBgn0266518,FBgn0033096,FBgn0033100,FBgn0033090,FBgn0026761,FBgn0033087,FBgn0013732,FBgn0033086,FBgn0266525,FBgn0053919,FBgn0014009,FBgn0042085,FBgn0028579,FBgn0033097,FBgn0000054,FBgn0033081,FBgn0027066,FBgn0086655,FBg…
FBgn0263587	FBgn0002466,FBgn0036286,Novel000104,FBgn0036288,FBgn0020388,FBgn0052102,FBgn0036289,FBgn0262524,FBgn0036302,FBgn0000625,FBgn0036290,FBgn0264848,FBgn0041775,FBgn0036298,FBgn0036292,FBgn0053725,FBgn0036299,FBgn0036300,FBgn0036287,FBgn0085271,FBgn0036291,FBgn0015919,FBgn0004926,FBgn0036294,FBgn0036301,FBgn0015904
FBgn0263588	FBgn0039671,FBgn0039670,FBgn0040623,FBgn0039664,FBgn0039669,FBgn0039665,FBgn0266137,FBgn0039674,FBgn0004369,FBgn0039667,FBgn0262873,FBgn0086361,FBgn0051041,FBgn0039673,FBgn0039666,FBgn0039663,FBgn0000492,FBgn0039668
FBgn0263595	FBgn0015011,FBgn0015008,FBgn0000015,FBgn0051274,FBgn0043069,FBgn0038461,FBgn0038458,FBgn0038463,FBgn0038462,FBgn0038460,FBgn0000014
FBgn0263611	FBgn0032835,FBgn0004374,FBgn0014127,FBgn0003141,FBgn0045064,FBgn0263873,FBgn0042129,FBgn0263773,FBgn0003978,FBgn0044811,FBgn0262140,FBgn0032843,FBgn0032834,FBgn0054051,FBgn0032827,FBgn0032839,FBgn0032840,FBgn0019686,FBgn0032836,FBgn0264443,FBgn0053117,FBgn0014000,FBgn0032833
FBgn0263612	FBgn0032126,FBgn0032129,FBgn0032120,FBgn0032132,FBgn0032123,FBgn0019809,FBgn0028479,FBgn0051709,FBgn0032131,FBgn0000273,FBgn0032122,FBgn0032135,FBgn0032127,FBgn0051882,FBgn0014179,FBgn0032130,FBgn0004868,FBgn0040070,FBgn0032125,FBgn0053299,FBgn0032124,FBgn0032136
FBgn0263613	FBgn0015371,FBgn0262547,FBgn0261854,FBgn0043530,FBgn0029082,FBgn0033990,FBgn0033993,FBgn0262954,FBgn0033987,FBgn0053467,FBgn0033989,FBgn0033994,FBgn0033988
FBgn0263615	FBgn0036214,FBgn0259748,FBgn0036232,FBgn0036226,FBgn0036220,FBgn0266100,FBgn0259140,FBgn0036224,FBgn0262986,FBgn0036210,FBgn0036227,FBgn0036228,FBgn0036221,FBgn0036239,FBgn0028573,FBgn0036213,FBgn0004381,FBgn0262366,FBgn0036230,FBgn0036236,FBgn0036218,FBgn0036222,FBgn0036217,FBgn0036235,FBgn0036208,FBgn0052095,FBgn0036225,FBgn0036212,FBgn0264488,FBgn0026432,FBgn0036219,FBgn0036237,FBgn0053265,FBg…
FBgn0263616	FBgn0261682,FBgn0001099,FBgn0036502,FBgn0261681,FBgn0036505,FBgn0040805,FBgn0036494,FBgn0262893,FBgn0026738,FBgn0036495,FBgn0004228,FBgn0036498,FBgn0053985,FBgn0004396,FBgn0036504,FBgn0036499,FBgn0036497,FBgn0036503,FBgn0000565,FBgn0036500,FBgn0004052,FBgn0036501,FBgn0053983,FBgn0036496,FBgn0028377,FBgn0053986
FBgn0263618	FBgn0035585,FBgn0035582,FBgn0005775,FBgn0047330,FBgn0035577,FBgn0035581,FBgn0052232,FBgn0052237,FBgn0035584,FBgn0035583,FBgn0028699,FBgn0035578
FBgn0263622	FBgn0011669,FBgn0039378,FBgn0039371,FBgn0011670,FBgn0028717,FBgn0039380,FBgn0039376,FBgn0039366,FBgn0039369,FBgn0051093,FBgn0011668,FBgn0039367,FBgn0039374,FBgn0066101,FBgn0051092,FBgn0039381,FBgn0039379,FBgn0250831,FBgn0040602,FBgn0039370,FBgn0027865,FBgn0039373,FBgn0261061,FBgn0039368,FBgn0051380,FBgn0011273
FBgn0263623	FBgn0027865,FBgn0039373,FBgn0039379,FBgn0039370,FBgn0040602,FBgn0250831,FBgn0051092,FBgn0039381,FBgn0011273,FBgn0261061,FBgn0051380,FBgn0039368,FBgn0028717,FBgn0039378,FBgn0011669,FBgn0039371,FBgn0011670,FBgn0039367,FBgn0011668,FBgn0066101,FBgn0039374,FBgn0039380,FBgn0039369,FBgn0051093,FBgn0039376,FBgn0039366
FBgn0263624	FBgn0028717,FBgn0039371,FBgn0011670,FBgn0011669,FBgn0039378,FBgn0039374,FBgn0066101,FBgn0011668,FBgn0039367,FBgn0039366,FBgn0039376,FBgn0039369,FBgn0051093,FBgn0039380,FBgn0039379,FBgn0039370,FBgn0040602,FBgn0250831,FBgn0039373,FBgn0027865,FBgn0039381,FBgn0051092,FBgn0039385,FBgn0011273,FBgn0051380,FBgn0039368,FBgn0261061
FBgn0263625	FBgn0011273,FBgn0039385,FBgn0261061,FBgn0039368,FBgn0051380,FBgn0039379,FBgn0040602,FBgn0039370,FBgn0250831,FBgn0039373,FBgn0027865,FBgn0051092,FBgn0039381,FBgn0011668,FBgn0039367,FBgn0039374,FBgn0066101,FBgn0039380,FBgn0039376,FBgn0039366,FBgn0051093,FBgn0039369,FBgn0028717,FBgn0011669,FBgn0039378,FBgn0039371,FBgn0011670
FBgn0263626	FBgn0265082,FBgn0037293,FBgn0262605,FBgn0250839,FBgn0037290,FBgn0037291,FBgn0037288,FBgn0004436,Novel000141,FBgn0037292,FBgn0010313,FBgn0040684
FBgn0263648	FBgn0001970,FBgn0261563,Novel000018,FBgn0261534,FBgn0052971,FBgn0028531,FBgn0015546,FBgn0264253,FBgn0004858,FBgn0261529,Novel000038,FBgn0261535,FBgn0028530,FBgn0015791,FBgn0016930,FBgn0262354,FBgn0020258,FBgn0028916
FBgn0263649	FBgn0028916,FBgn0020258,FBgn0016930,FBgn0262354,FBgn0015791,FBgn0261535,FBgn0028530,Novel000038,FBgn0261529,FBgn0015546,FBgn0264253,FBgn0004858,FBgn0028531,FBgn0261534,FBgn0052971,Novel000018,FBgn0001970,FBgn0261563
FBgn0263650	FBgn0038181,FBgn0000454,FBgn0051495,FBgn0038186,FBgn0008646,FBgn0259730,FBgn0259731,FBgn0267383,FBgn0259721,FBgn0259732,FBgn0259733,FBgn0038180,FBgn0260464,FBgn0002862,FBgn0038179,FBgn0000576,FBgn0266464,FBgn0085412,FBgn0038183
FBgn0263651	FBgn0038179,FBgn0000576,FBgn0259733,FBgn0038180,FBgn0260464,FBgn0002862,FBgn0085412,FBgn0266464,FBgn0038183,FBgn0051495,FBgn0008646,FBgn0259730,FBgn0038186,FBgn0038181,FBgn0000454,FBgn0259721,FBgn0267383,FBgn0259732,FBgn0259731
FBgn0263652	FBgn0259146,FBgn0039406,FBgn0000591,FBgn0266668,FBgn0039398,FBgn0002578,FBgn0028833,FBgn0250757,FBgn0002733,FBgn0002734,FBgn0039405,FBgn0039408,FBgn0262576,FBgn0039407,FBgn0000206,FBgn0039402,FBgn0002633,FBgn0051324,FBgn0002632,FBgn0039411,FBgn0002592,FBgn0002735,FBgn0015269,FBgn0039395,FBgn0002631,FBgn0039403,FBgn0039404,FBgn0002609,FBgn0001139,FBgn0002629,FBgn0039396,FBgn0260224,FBgn0002732
FBgn0263653	FBgn0039398,FBgn0266668,FBgn0000591,FBgn0259146,FBgn0039406,FBgn0002734,FBgn0002733,FBgn0250757,FBgn0028833,FBgn0002578,FBgn0039407,FBgn0262576,FBgn0039408,FBgn0039405,FBgn0039402,FBgn0000206,FBgn0051324,FBgn0002633,FBgn0002735,FBgn0039411,FBgn0002592,FBgn0002632,FBgn0039404,FBgn0039403,FBgn0002631,FBgn0015269,FBgn0039395,FBgn0260224,FBgn0002732,FBgn0039396,FBgn0001139,FBgn0002629,FBgn0002609
FBgn0263657	FBgn0031268,FBgn0031270,Novel000028,FBgn0031265,FBgn0040107,FBgn0031264,FBgn0021874,FBgn0031260,FBgn0010323,FBgn0005660,FBgn0010602,FBgn0260933,FBgn0023489,FBgn0040106,FBgn0031273,FBgn0031267,FBgn0000497,FBgn0031263,FBgn0031261,FBgn0003963,FBgn0031266,FBgn0013323
FBgn0263658	FBgn0040106,FBgn0023489,FBgn0031273,FBgn0000497,FBgn0031267,FBgn0031263,FBgn0031261,FBgn0003963,FBgn0031266,FBgn0013323,FBgn0031270,FBgn0031268,Novel000028,FBgn0040107,FBgn0031264,FBgn0031265,FBgn0021874,FBgn0031260,FBgn0010323,FBgn0005660,FBgn0010602,FBgn0260933
FBgn0263660	FBgn0033427,FBgn0053758,FBgn0033423,FBgn0010342,FBgn0033421,FBgn0033422,FBgn0033426,FBgn0050339,FBgn0033438,FBgn0259246,FBgn0050340,FBgn0050338,FBgn0261016,FBgn0259234,FBgn0085436,FBgn0053757,FBgn0033437,FBgn0033428,FBgn0033429,FBgn0004360,FBgn0025286,FBgn0033434,FBgn0050005,FBgn0050000,Novel000058,FBgn0033431
FBgn0263661	FBgn0036333,FBgn0086916,FBgn0036345,FBgn0011284,FBgn0036330,FBgn0085457,FBgn0036337,FBgn0036331,FBgn0036342,FBgn0036336,FBgn0036346,FBgn0266709,FBgn0036340,FBgn0036329,FBgn0036343,FBgn0085458,FBgn0260441,FBgn0010452,FBgn0053262,FBgn0036334,FBgn0083978,FBgn0036341,FBgn0036335,FBgn0036332
FBgn0263662	FBgn0038894,FBgn0038893,FBgn0013984,FBgn0259113,FBgn0004863,FBgn0038892,FBgn0011766,FBgn0038890,FBgn0051176,FBgn0002941
FBgn0263663	FBgn0262538,FBgn0039003,FBgn0039009,FBgn0039004,FBgn0039015,FBgn0086253,FBgn0266418,FBgn0039016,FBgn0039024,FBgn0046114,FBgn0039007,FBgn0039006,FBgn0262541,FBgn0040588,FBgn0266409,FBgn0262540,FBgn0039023,FBgn0262539,FBgn0039028,FBgn0039020,FBgn0039029,FBgn0262537,FBgn0039027,FBgn0039019,FBgn0051151,FBgn0039008,FBgn0039013,FBgn0039025,FBgn0039002,FBgn0039010,FBgn0039026,FBgn0051139,FBgn0039022,FBg…
FBgn0263664	FBgn0039040,FBgn0039044,FBgn0051281,FBgn0017590,FBgn0039034,FBgn0039030,FBgn0039048,FBgn0039039,FBgn0027526,FBgn0053193,FBgn0263390,FBgn0039045,FBgn0039038,FBgn0085404,FBgn0039042,FBgn0041225,FBgn0039033,FBgn0039031,FBgn0039041,FBgn0039043
FBgn0263665	FBgn0259677,FBgn0069973,FBgn0069938,FBgn0000719,FBgn0263829,FBgn0263830,FBgn0031201
FBgn0263708	FBgn0046294,FBgn0034204,FBgn0262882,FBgn0050458,FBgn0034206,FBgn0262961,FBgn0034202,FBgn0265487,FBgn0034201,FBgn0262568,FBgn0034205,FBgn0050457
FBgn0263709	FBgn0034210,FBgn0262568,FBgn0010620,FBgn0265487,FBgn0046294,FBgn0262961,FBgn0034206
FBgn0263764	Novel000017,FBgn0003313,FBgn0032360,FBgn0263087,FBgn0261648,FBgn0000287
FBgn0263765	FBgn0028888,FBgn0041103,FBgn0032563,FBgn0028852,FBgn0259982,FBgn0028862,FBgn0259965,FBgn0261268,FBgn0086691,FBgn0011239,FBgn0028850,FBgn0001981,FBgn0027559,FBgn0028853,FBgn0262875,FBgn0045842,FBgn0028516
FBgn0263767	FBgn0266452,FBgn0036489,FBgn0036479,FBgn0263762,FBgn0036483,FBgn0023174,FBgn0002778,FBgn0086690,FBgn0036467,FBgn0036474,FBgn0266441,FBgn0036482,FBgn0263761,FBgn0036462,FBgn0014002,FBgn0040296,FBgn0036459,FBgn0036488,FBgn0036461,FBgn0261090,FBgn0036471,FBgn0263763,FBgn0036463,FBgn0036465,FBgn0036484,FBgn0047338,FBgn0026320,FBgn0036485,FBgn0036468,FBgn0052847,FBgn0036481,FBgn0025776,FBgn0036486,FBg…
FBgn0263768	FBgn0037477,FBgn0024289,Novel000171,FBgn0037465,FBgn0014863,FBgn0019828,FBgn0037463,Novel000173,Novel000174,FBgn0250732,FBgn0261238,FBgn0037470,FBgn0051493,FBgn0037468,Novel000172,Novel000170,FBgn0037475,FBgn0011020,FBgn0010774,FBgn0037464,FBgn0037473,FBgn0002306,FBgn0003884,FBgn0037481,FBgn0051248,FBgn0040670,Novel000175,FBgn0037467,FBgn0037478,FBgn0037482,FBgn0037466,FBgn0037469,FBgn0260642,FBg…
FBgn0263769	FBgn0004956,FBgn0053542,FBgn0030913,FBgn0008635,FBgn0030918,FBgn0264395,FBgn0030912,FBgn0052549,FBgn0052547,FBgn0030915,FBgn0004957,FBgn0052551,FBgn0085357,FBgn0265784,FBgn0022355,FBgn0259223,FBgn0052548,FBgn0030914,FBgn0030921,FBgn0264393
FBgn0263778	FBgn0030028,FBgn0015519,FBgn0030025,FBgn0030030,FBgn0262976,FBgn0030034,FBgn0261873,FBgn0030026,FBgn0030029,FBgn0020653,FBgn0040928,FBgn0030033,FBgn0030035,FBgn0017566,FBgn0261793,FBgn0030027
FBgn0263802	FBgn0033557,FBgn0050015,FBgn0033558,FBgn0027499,FBgn0033550,FBgn0024956,FBgn0033542,Novel000059,FBgn0033548,FBgn0033543,FBgn0027525,FBgn0033556,FBgn0033555,FBgn0033547,FBgn0033554,FBgn0033551,FBgn0029134,FBgn0086898,FBgn0053144,FBgn0033544,FBgn0005586,FBgn0033549,FBgn0050018,FBgn0024836
FBgn0263838	FBgn0032746,FBgn0263198,FBgn0032731,FBgn0032752,FBgn0028569,FBgn0086442,FBgn0263982,FBgn0086444,FBgn0032733,FBgn0032740,FBgn0002023,FBgn0051800,FBgn0032753,FBgn0032723,FBgn0032741,FBgn0032734,FBgn0032724,FBgn0015772,FBgn0032749,FBgn0051792,FBgn0261396,FBgn0051793,FBgn0032729,FBgn0032744,FBgn0000422,FBgn0002022,FBgn0032732,FBgn0000075,FBgn0002021,FBgn0032725,FBgn0032750,FBgn0032748,FBgn0002036,FBg…
FBgn0263843	FBgn0031561,FBgn0040104,FBgn0031573,FBgn0031568,FBgn0051955,FBgn0261054,FBgn0259956,FBgn0003386,FBgn0015376,FBgn0004893,FBgn0031558,FBgn0051779,FBgn0031575,FBgn0003430,FBgn0263842,FBgn0051778,FBgn0262721,FBgn0031560,FBgn0051960,FBgn0259957,FBgn0004567,FBgn0262621,FBgn0051958,FBgn0031564,FBgn0031574,FBgn0031566,FBgn0031563,FBgn0031559,FBgn0259955,FBgn0263846,FBgn0085369,FBgn0051777,FBgn0031571,FBg…
FBgn0263844	FBgn0027364,FBgn0052432,FBgn0037022,FBgn0045474,FBgn0040634,FBgn0262896,FBgn0053912,FBgn0037021,FBgn0037030,FBgn0037027,FBgn0037025,FBgn0037023,FBgn0037024,FBgn0037016,FBgn0037015,FBgn0037020,FBgn0040636,FBgn0016696,FBgn0259243,FBgn0037019,FBgn0037026,FBgn0027055,FBgn0001320,FBgn0037031,FBgn0037028,FBgn0085289,FBgn0037017,FBgn0086915,FBgn0037018
FBgn0263845	FBgn0037015,FBgn0037023,FBgn0037030,FBgn0037021,FBgn0037027,FBgn0037025,FBgn0037016,FBgn0037024,FBgn0259972,FBgn0262896,FBgn0053912,FBgn0052432,FBgn0045474,FBgn0037022,FBgn0027364,FBgn0040634,FBgn0037018,FBgn0086915,FBgn0037028,FBgn0037031,FBgn0085289,FBgn0037017,FBgn0037019,FBgn0037026,FBgn0027055,FBgn0040636,FBgn0037020,FBgn0259243,FBgn0016696
FBgn0263866	FBgn0051915,FBgn0031707,FBgn0031708,Novel000030,FBgn0051648,FBgn0031702,FBgn0031713,FBgn0016660,FBgn0051989,FBgn0031711,FBgn0000318,Novel000031,FBgn0031703,FBgn0261963,FBgn0031710,FBgn0016920
FBgn0263867	FBgn0031703,FBgn0031711,Novel000031,FBgn0000318,FBgn0261963,FBgn0031710,FBgn0016920,FBgn0031707,FBgn0051915,FBgn0031708,FBgn0051648,Novel000030,FBgn0051989,FBgn0016660,FBgn0031713,FBgn0031702
FBgn0263868	FBgn0016920,FBgn0031710,FBgn0261963,FBgn0000318,FBgn0031711,Novel000031,FBgn0031703,FBgn0051989,FBgn0031702,FBgn0031713,FBgn0016660,FBgn0051648,Novel000030,FBgn0031708,FBgn0031707,FBgn0051915
FBgn0263869	FBgn0264342,FBgn0031620,FBgn0083938,Novel000029,FBgn0031613,FBgn0053196,FBgn0031617,FBgn0031619
FBgn0263870	FBgn0031258,FBgn0003963,FBgn0031251,FBgn0031257,FBgn0000061,FBgn0264855,FBgn0004611,FBgn0031252,FBgn0031254,FBgn0031250,FBgn0004583,FBgn0031255,FBgn0043364,FBgn0027592,FBgn0003278,FBgn0015924,FBgn0263933,FBgn0031256,FBgn0002593,FBgn0031253
FBgn0263871	FBgn0027592,FBgn0031250,FBgn0043364,FBgn0031255,FBgn0004583,FBgn0031248,FBgn0031253,FBgn0002593,FBgn0053127,FBgn0031256,FBgn0003278,FBgn0024352,FBgn0263933,FBgn0015924,FBgn0031251,FBgn0031249,FBgn0003963,FBgn0031257,FBgn0031258,FBgn0020622,FBgn0031254,FBgn0051921,FBgn0264086,FBgn0000061,FBgn0031252,FBgn0264855,FBgn0004611
FBgn0263872	FBgn0031233,FBgn0031245,FBgn0031244,FBgn0031249,FBgn0031251,FBgn0031235,FBgn0020622,FBgn0086856,FBgn0051921,FBgn0264086,FBgn0264855,FBgn0004611,FBgn0086855,FBgn0003444,FBgn0031239,FBgn0000061,FBgn0017457,FBgn0086912,FBgn0031250,FBgn0053127,FBgn0031247,FBgn0031248,FBgn0022246,FBgn0003278,FBgn0031240,FBgn0025686,FBgn0266557,FBgn0031238,FBgn0024352
FBgn0263874	FBgn0040232,FBgn0032358,FBgn0032360,FBgn0052831,FBgn0264442,FBgn0040233,FBgn0020270,FBgn0000287,FBgn0032359
FBgn0263967	FBgn0033168,FBgn0033185,FBgn0033195,FBgn0033188,FBgn0263240,FBgn0015929,FBgn0261397,FBgn0033167,FBgn0262583,FBgn0033178,FBgn0033186,FBgn0003460,FBgn0033194,FBgn0033162,FBgn0033165,FBgn0033191,FBgn0004133,FBgn0261385,FBgn0040513,FBgn0022772,FBgn0033179,FBgn0010548,FBgn0033174,FBgn0025185,FBgn0033183,FBgn0033190,FBgn0050503,FBgn0041243,FBgn0033169,FBgn0262948,FBgn0033184,FBgn0050502,FBgn0259745,FBg…
FBgn0263970	FBgn0040778,FBgn0033236,FBgn0033252,FBgn0033250,FBgn0033249,FBgn0033266,FBgn0021814,FBgn0026361,FBgn0033235,FBgn0025469,FBgn0027054,FBgn0050379,FBgn0013307,FBgn0028562,FBgn0025360,FBgn0260398,FBgn0033243,FBgn0033241,FBgn0026722,FBgn0033261,FBgn0033240,FBgn0027548,FBgn0050372,FBgn0033246,FBgn0050381,FBgn0033264,FBgn0028561,FBgn0033258,FBgn0028563,FBgn0013308,FBgn0033238,FBgn0023171,FBgn0020279,FBg…
FBgn0263975	FBgn0036640,FBgn0262732,FBgn0040512,FBgn0003515,FBgn0036639,FBgn0028693,FBgn0003741,FBgn0004569,FBgn0026061,FBgn0004465,FBgn0260388,FBgn0036652,FBgn0262842,FBgn0042177,FBgn0042178,FBgn0027500,FBgn0025558,FBgn0053158,FBgn0264605,FBgn0036638,FBgn0036643,FBgn0263131,FBgn0063485,FBgn0017572,FBgn0002284,FBgn0250814,FBgn0260960,FBgn0036648,FBgn0010223,FBgn0002283,FBgn0036641,FBgn0052163,FBgn0000017
FBgn0264083	FBgn0032000,FBgn0040958,FBgn0032021,FBgn0032032,FBgn0262598,FBgn0032030,FBgn0032031,FBgn0031998,FBgn0262359,FBgn0003502,FBgn0032005,FBgn0027094,FBgn0015299,FBgn0032004,FBgn0032016,FBgn0028987,FBgn0263852,FBgn0010265,FBgn0032008,FBgn0032006,FBgn0032022,FBgn0032025,FBgn0032003,FBgn0040959,FBgn0261437,FBgn0015583,FBgn0032002,FBgn0032036,FBgn0262002,FBgn0003607,FBgn0032034,FBgn0260439,FBgn0040098,FBg…
FBgn0264084	FBgn0042187,FBgn0000097,FBgn0259717,FBgn0031414,FBgn0031395,FBgn0267378,FBgn0051668,FBgn0014010,FBgn0031413,FBgn0031398,FBgn0040715,FBgn0051679,FBgn0031397,FBgn0031410,FBgn0031417,FBgn0010288,FBgn0031403,FBgn0261523,FBgn0031418,FBgn0261647,FBgn0031407,FBgn0250841,FBgn0264979,FBgn0085201,FBgn0031401,FBgn0031420,FBgn0011832,FBgn0031406,FBgn0051681,FBgn0053124,FBgn0085203,FBgn0042186,FBgn0031419,FBg…
FBgn0264085	FBgn0031397,FBgn0051679,FBgn0040715,FBgn0010288,FBgn0261523,FBgn0031403,FBgn0031417,FBgn0031410,FBgn0042187,FBgn0031423,FBgn0031398,FBgn0031413,FBgn0014010,FBgn0051668,FBgn0267378,FBgn0259717,FBgn0031414,FBgn0031395,FBgn0028570,FBgn0031419,FBgn0042186,FBgn0085203,FBgn0053124,FBgn0051681,FBgn0011832,FBgn0031406,FBgn0054049,FBgn0031412,FBgn0031399,FBgn0051682,FBgn0051949,FBgn0031409,FBgn0052463,FBg…
FBgn0264261	FBgn0028944,FBgn0028947,FBgn0028946,FBgn0020371,FBgn0028950,FBgn0002524,FBgn0259922,FBgn0028948,FBgn0003448,FBgn0028949,FBgn0028880,FBgn0001983,FBgn0028370,FBgn0028892
FBgn0264262	FBgn0032967,FBgn0032969,FBgn0032965,FBgn0032968,FBgn0032966,FBgn0003866,FBgn0051600,FBgn0051612
FBgn0264263	FBgn0028645,FBgn0051826,FBgn0261925,FBgn0265668,FBgn0028903,FBgn0001990,FBgn0264260,FBgn0032577,FBgn0262150,FBgn0001987,FBgn0001986,FBgn0028901,FBgn0028514,FBgn0041183,FBgn0028902,FBgn0028935,FBgn0028507,FBgn0001989,FBgn0028857,FBgn0051823,FBgn0028900,FBgn0041627,FBgn0051735,FBgn0010382,FBgn0051821
FBgn0264264	FBgn0028516,FBgn0028853,FBgn0027559,FBgn0001981,FBgn0045842,FBgn0262875,FBgn0028862,FBgn0259982,FBgn0028850,FBgn0011239,FBgn0261268,FBgn0086691,FBgn0259965,FBgn0041103,FBgn0028888,FBgn0028852,FBgn0032563
FBgn0264265	FBgn0039972,FBgn0259683,FBgn0032981,FBgn0261802,FBgn0032979,FBgn0032988,FBgn0083973,Novel000042,FBgn0032987,FBgn0032986
FBgn0264266	FBgn0053300,FBgn0051876,FBgn0032150,FBgn0259713,FBgn0032144,FBgn0085212,FBgn0032160,FBgn0025700,FBgn0010520,FBgn0025117,FBgn0032147,FBgn0032151,FBgn0051713,FBgn0015035,FBgn0032154,FBgn0270924,FBgn0032157,FBgn0032163,FBgn0032149,FBgn0029174,FBgn0040064,FBgn0032153,FBgn0032162,FBgn0004867,FBgn0032161,FBgn0032156,FBgn0265001,Novel000016,FBgn0259712,FBgn0032167,FBgn0051712,FBgn0011291,FBgn0065109,FBg…
FBgn0264268	FBgn0053252,FBgn0030797,FBgn0030792,FBgn0030790,FBgn0030798,FBgn0030789,FBgn0030802,FBgn0030803,Novel000236,FBgn0030801,FBgn0030799,FBgn0030805,FBgn0030800,FBgn0030791,FBgn0030793,FBgn0030807,FBgn0030788,FBgn0024941,FBgn0030795,FBgn0030804,FBgn0030809,FBgn0030796,FBgn0030794,FBgn0030808,FBgn0030806,FBgn0266354,FBgn0027556
FBgn0264269	FBgn0262036,FBgn0032129,FBgn0032126,FBgn0032117,FBgn0032120,FBgn0032123,FBgn0032119,FBgn0053723,FBgn0085211,FBgn0032115,FBgn0011232,FBgn0012036,FBgn0032122,FBgn0000640,FBgn0032127,FBgn0032130,FBgn0002973,FBgn0032116,FBgn0004868,FBgn0032125,FBgn0085395,FBgn0032124
FBgn0264271	FBgn0011554,FBgn0082585,FBgn0011555,FBgn0050031,FBgn0050022,FBgn0011556,FBgn0010359,FBgn0033635,FBgn0010425,FBgn0041241,FBgn0033628,FBgn0003382,FBgn0033629,FBgn0033627,FBgn0015001,FBgn0000581,FBgn0260499,FBgn0043470,FBgn0050026,FBgn0003863,FBgn0033624,FBgn0024188,FBgn0000577,FBgn0001269,FBgn0050025,FBgn0040503,FBgn0015872,FBgn0033623,FBgn0021795,FBgn0001276,FBgn0010357,FBgn0033633,FBgn0054054,FBg…
FBgn0264310	Novel000127,FBgn0035151,FBgn0035155,FBgn0035159,FBgn0035154,FBgn0035150,FBgn0035153,FBgn0035161,FBgn0035148,FBgn0035149,FBgn0035162,FBgn0000575,FBgn0025676,FBgn0035152,Novel000128,FBgn0052483,FBgn0260755,FBgn0035160,FBgn0035158,FBgn0035147,FBgn0035164,FBgn0260862,FBgn0260756,FBgn0035157
FBgn0264337	FBgn0264339,FBgn0034878,FBgn0050414,FBgn0034859,FBgn0041712,FBgn0034867,FBgn0034880,FBgn0034858,FBgn0015277,FBgn0041234,FBgn0015903,FBgn0034870,FBgn0041233,FBgn0034865,FBgn0000241,FBgn0028497,FBgn0261786,FBgn0034871,FBgn0034863,FBgn0034879,FBgn0050184,FBgn0250838,FBgn0034861,FBgn0034876,FBgn0050411,FBgn0050185,FBgn0010501,FBgn0034860,FBgn0034866,FBgn0034869,FBgn0015372,FBgn0050181,FBgn0034877,FBg…
FBgn0264338	FBgn0034878,FBgn0264339,FBgn0260761,FBgn0034867,FBgn0034880,FBgn0260762,FBgn0034885,FBgn0041234,FBgn0015903,FBgn0015277,FBgn0260455,FBgn0034882,FBgn0261786,FBgn0041233,FBgn0034870,FBgn0034865,FBgn0000241,FBgn0034863,FBgn0034871,FBgn0034876,FBgn0010501,FBgn0050185,FBgn0067903,FBgn0050411,FBgn0050184,FBgn0034879,FBgn0034861,FBgn0262845,FBgn0034883,FBgn0034860,FBgn0034877,FBgn0026384,FBgn0034884,FBg…
FBgn0264345	FBgn0031770,FBgn0031765,FBgn0031766,FBgn0051643,FBgn0031776,FBgn0051642,FBgn0025742,FBgn0031785,FBgn0031784,FBgn0031772,FBgn0266450,FBgn0031764,FBgn0001170,FBgn0031771,FBgn0085208,FBgn0031774,FBgn0261683,FBgn0031769,FBgn0000052,FBgn0001941,FBgn0031768,FBgn0031762,FBgn0031781,FBgn0031760,FBgn0040950,FBgn0031786,FBgn0031763,FBgn0031782,FBgn0266521,FBgn0261697,FBgn0266445,FBgn0029161,FBgn0266449,FBg…
FBgn0264346	FBgn0051806,FBgn0032626,FBgn0032625,FBgn0053179,FBgn0265579,FBgn0083942,FBgn0051784,FBgn0265607,FBgn0032624
FBgn0264347	FBgn0264364,FBgn0000182,FBgn0013433,FBgn0028858,FBgn0032577,FBgn0085196,FBgn0265668,FBgn0261925,FBgn0028645,FBgn0028856,FBgn0028644,FBgn0051821,FBgn0051735,FBgn0051823,FBgn0045827,FBgn0028857,FBgn0051820,FBgn0028935,FBgn0266459,FBgn0028514,FBgn0041183
FBgn0264348	FBgn0032705,FBgn0045852,FBgn0086909,FBgn0032717,FBgn0032700,FBgn0032709,FBgn0015808,FBgn0032719,FBgn0261349,FBgn0040992,FBgn0260228,FBgn0264362,FBgn0086681,FBgn0032701,FBgn0027074,FBgn0259201,FBgn0053120,FBgn0027070,FBgn0032704,FBgn0025608,FBgn0040993,FBgn0032715,FBgn0051752,FBgn0005617,FBgn0032713,FBgn0032706,FBgn0032707,FBgn0032698,FBgn0032703,FBgn0032721,FBgn0032720,FBgn0261806,FBgn0032699,FBg…
FBgn0264349	FBgn0260955,FBgn0053309,FBgn0032549,FBgn0261568,FBgn0259213,FBgn0085195,FBgn0028870,FBgn0032551,FBgn0032553,FBgn0013301,FBgn0028866,FBgn0260954,FBgn0032554,FBgn0013300,FBgn0028887,FBgn0028838,FBgn0250834,FBgn0028868,FBgn0261567,FBgn0260953,FBgn0028886
FBgn0264351	FBgn0032312,FBgn0032315,FBgn0027453,FBgn0024227,FBgn0032298,FBgn0032314,FBgn0032304,FBgn0032313,FBgn0032299,FBgn0262599,FBgn0032305,FBgn0032303,FBgn0051869,FBgn0011676,FBgn0027363,FBgn0004363,FBgn0015320,FBgn0261871,FBgn0260453,FBgn0051870,FBgn0069354,FBgn0027550,Novel000033,FBgn0260454,FBgn0032311,FBgn0032318
FBgn0264352	FBgn0015381,FBgn0031757,FBgn0001089,FBgn0001942,FBgn0043362,FBgn0040949,FBgn0051644,FBgn0259959,FBgn0000308,FBgn0031759,FBgn0031758,FBgn0001128,FBgn0086265,FBgn0261055,FBgn0003979,FBgn0001941,FBgn0031760,FBgn0086266,FBgn0085410,FBgn0031746,FBgn0262999,FBgn0031753,FBgn0031747,FBgn0031751,FBgn0031752,FBgn0031749,FBgn0031741,FBgn0003980,FBgn0031745,FBgn0031756,FBgn0265785,FBgn0002855,FBgn0002856,FBg…
FBgn0264358	FBgn0033869,FBgn0033875,FBgn0050485,FBgn0033865,FBgn0050484,FBgn0033868,FBgn0033871,FBgn0033876,FBgn0000662,FBgn0033873,FBgn0033884,FBgn0033867,FBgn0261041,FBgn0000633,FBgn0086356,FBgn0013733,FBgn0033879,FBgn0263697,FBgn0033872,FBgn0033874,FBgn0033866,FBgn0033883,FBgn0033880
FBgn0264359	FBgn0033880,FBgn0263697,FBgn0033872,FBgn0033874,FBgn0033866,FBgn0033883,FBgn0013733,FBgn0033879,FBgn0000633,FBgn0086356,FBgn0000662,FBgn0033873,FBgn0033884,FBgn0261041,FBgn0033867,FBgn0033868,FBgn0050484,FBgn0033865,FBgn0033871,FBgn0033876,FBgn0033869,FBgn0033875,FBgn0050485
FBgn0264365	FBgn0032720,FBgn0264362,FBgn0027074,FBgn0259201,FBgn0261806,FBgn0053120,FBgn0003896,FBgn0032704,FBgn0027070,FBgn0025608,FBgn0040993,FBgn0032715,FBgn0051752,FBgn0032705,FBgn0045852,FBgn0032706,FBgn0032717,FBgn0032713,FBgn0032709,FBgn0015808,FBgn0032719,FBgn0032707,FBgn0040992,FBgn0032721,FBgn0260228
FBgn0264366	FBgn0032453,FBgn0032457,FBgn0032452,FBgn0032454,FBgn0015399,FBgn0032456,FBgn0032455
FBgn0264367	FBgn0046888,FBgn0045485,FBgn0053179,FBgn0045486,FBgn0085198,FBgn0051784,FBgn0083942,FBgn0265607,FBgn0045487,FBgn0032624,FBgn0032626,FBgn0032625
FBgn0264369	FBgn0031451,FBgn0031474,FBgn0031469,FBgn0031468,FBgn0031454,FBgn0031466,FBgn0031449,FBgn0031476,FBgn0028398,FBgn0031457,FBgn0015521,FBgn0031465,FBgn0031473,FBgn0031467,FBgn0051694,FBgn0031452,FBgn0051950,FBgn0031453,FBgn0031470,FBgn0031462,FBgn0031479,FBgn0051690,FBgn0031450,FBgn0031460,FBgn0031464,FBgn0028970,FBgn0031459,FBgn0031478,FBgn0250906,FBgn0031463,FBgn0031455,FBgn0031458,FBgn0031456,FBg…
FBgn0264370	FBgn0004892,FBgn0031548,FBgn0053123,FBgn0051954,FBgn0261054,FBgn0031547,FBgn0259952,FBgn0031545,FBgn0259953,FBgn0031550,FBgn0000721,FBgn0015663,FBgn0085369,FBgn0014396,FBgn0259951,FBgn0031544,FBgn0031549,FBgn0031546,FBgn0264363,FBgn0031542,FBgn0002985,FBgn0261560,FBgn0024244,FBgn0031554
FBgn0264371	FBgn0002985,FBgn0024244,FBgn0031554,FBgn0031550,FBgn0000721,FBgn0015663,FBgn0085369,FBgn0014396,FBgn0259951,FBgn0031544,FBgn0031549,FBgn0031546,FBgn0264363,FBgn0031542,FBgn0259952,FBgn0031545,FBgn0259953,FBgn0004892,FBgn0031548,FBgn0053123,FBgn0051954,FBgn0261054,FBgn0031547
FBgn0264373	FBgn0028857,FBgn0045827,FBgn0028856,FBgn0028644,FBgn0051821,FBgn0028514,FBgn0266459,FBgn0051820,FBgn0032577,FBgn0028858,FBgn0013433,FBgn0000182,FBgn0028520,FBgn0264364,FBgn0028645,FBgn0085196
FBgn0264374	FBgn0028644,FBgn0028520,FBgn0264364,FBgn0028856,FBgn0028858,FBgn0013433,FBgn0000182,FBgn0045827,FBgn0032577,FBgn0028857,FBgn0085196,FBgn0051820,FBgn0266459,FBgn0028645,FBgn0028514
FBgn0264375	FBgn0032833,FBgn0014000,FBgn0053117,FBgn0054051,FBgn0264443,FBgn0032834,FBgn0262140,FBgn0044811,FBgn0032836,FBgn0042129,FBgn0263873,FBgn0032827,FBgn0032835
FBgn0264376	FBgn0032835,FBgn0032827,FBgn0263873,FBgn0042129,FBgn0044811,FBgn0032836,FBgn0262140,FBgn0032834,FBgn0264443,FBgn0014000,FBgn0053117,FBgn0054051,FBgn0032833
FBgn0264378	FBgn0033989,FBgn0033987,FBgn0033982,FBgn0053467,FBgn0033984,FBgn0033988,FBgn0033985,FBgn0027596,FBgn0262547,FBgn0261854,FBgn0033990,FBgn0040747,FBgn0043530,FBgn0029082,FBgn0033983
FBgn0264379	FBgn0033995,FBgn0262954,FBgn0033996,FBgn0259966,FBgn0262478,FBgn0034002,FBgn0033994,FBgn0034005,FBgn0001187,FBgn0259737,FBgn0034001,FBgn0033998,FBgn0015371,FBgn0033993,FBgn0033999,FBgn0034000,FBgn0264377,FBgn0050081,FBgn0013467,FBgn0003328,FBgn0259878
FBgn0264380	FBgn0085446,FBgn0029877,FBgn0029890,FBgn0029881,FBgn0014031,FBgn0029887,FBgn0000524,FBgn0028336,FBgn0265362,FBgn0259242,FBgn0029892,FBgn0014026,FBgn0062413,FBgn0029888,FBgn0029893,FBgn0028360,FBgn0029891,FBgn0029878,FBgn0029882,FBgn0029874,FBgn0029880,FBgn0029879,FBgn0029885,FBgn0029873,FBgn0025815
FBgn0264381	FBgn0030521,FBgn0030518,FBgn0030525,FBgn0030519,FBgn0001612,FBgn0052626,FBgn0003218,FBgn0027537,Novel000206,FBgn0020909,FBgn0267033,FBgn0030514,FBgn0030505,FBgn0030524,FBgn0030522,FBgn0030512,FBgn0030530,FBgn0030528,FBgn0030509,FBgn0261244,FBgn0030529,FBgn0001087,FBgn0030508,FBgn0052625,FBgn0030507,FBgn0002878,FBgn0030510,FBgn0004047,FBgn0030506,FBgn0030511,Novel000205,FBgn0265726,FBgn0030520
FBgn0264382	FBgn0053181,FBgn0024943,FBgn0030034,FBgn0030040,FBgn0014032,FBgn0261793,FBgn0014465,FBgn0014466,FBgn0030050,FBgn0000359,FBgn0000360,FBgn0030048,FBgn0030051,FBgn0030033,FBgn0040928,FBgn0003023,FBgn0030052,FBgn0026679,FBgn0052713,FBgn0262976,FBgn0264975,FBgn0030041,FBgn0030049,FBgn0030038,FBgn0021767,FBgn0023506,FBgn0052712,FBgn0053223,FBgn0014464,FBgn0030035,FBgn0030039,FBgn0030037
FBgn0264383	FBgn0259098,FBgn0262612,FBgn0052719,FBgn0265265,FBgn0261615,FBgn0261616,FBgn0029952,FBgn0040923,FBgn0040922,FBgn0085366,FBgn0029941,FBgn0052720,FBgn0029951,FBgn0052726,FBgn0262827,FBgn0029950,FBgn0029949
FBgn0264384	Novel000222,FBgn0261549,FBgn0262900,FBgn0030074,FBgn0030092,FBgn0052706,Novel000226,FBgn0052707,FBgn0030085,FBgn0030078,Novel000225,FBgn0030077,Novel000224,FBgn0030088,FBgn0259734,FBgn0011661,FBgn0011586,FBgn0052708,FBgn0030091,FBgn0265413,FBgn0030082,FBgn0030086,FBgn0030081,FBgn0030090,FBgn0030066,FBgn0030087,FBgn0030071,Novel000223,FBgn0030089,FBgn0004856,FBgn0030067,FBgn0030073,Novel000227
FBgn0264385	FBgn0264270,FBgn0029931,FBgn0029925,FBgn0261284,FBgn0000330,FBgn0027106,FBgn0004143,FBgn0052732,Novel000219,Novel000218,FBgn0029930,Novel000220,FBgn0029922,FBgn0027108,FBgn0029932,FBgn0029929,FBgn0029924,FBgn0052736,FBgn0259204,FBgn0004646,FBgn0029928
FBgn0264390	FBgn0085387,FBgn0052507,FBgn0031132,FBgn0031127,FBgn0031130,FBgn0003300,FBgn0031128,FBgn0031126,FBgn0031129
FBgn0264391	FBgn0032798,FBgn0003231,FBgn0032775,FBgn0053532,FBgn0032772,FBgn0032796,FBgn0032810,FBgn0032793,FBgn0032785,FBgn0032804,FBgn0032801,FBgn0032799,FBgn0032805,FBgn0032779,FBgn0032787,FBgn0040268,FBgn0032773,FBgn0051798,FBgn0032771,FBgn0032809,FBgn0032783,FBgn0053116,FBgn0041789,FBgn0003732,FBgn0032790,FBgn0032803,FBgn0032782,FBgn0032774,FBgn0000964,FBgn0032788,FBgn0005672,FBgn0002044,FBgn0041180,FBg…
FBgn0264392	FBgn0028375,FBgn0024734,FBgn0028895,FBgn0001992,FBgn0085197,FBgn0028884,FBgn0262000,FBgn0028897,FBgn0000250,FBgn0028894,FBgn0028515,FBgn0001994,FBgn0011708,FBgn0040079,FBgn0001086,FBgn0000339,FBgn0032582,FBgn0015338,FBgn0028893,FBgn0028525,FBgn0002673,FBgn0001991,FBgn0261999,FBgn0028896
FBgn0264434	FBgn0264433,FBgn0031431,FBgn0031441,FBgn0031449,FBgn0031435,FBgn0031446,FBgn0031442,FBgn0041248,FBgn0031432,FBgn0031437,FBgn0041337,FBgn0263322,FBgn0031436,FBgn0026395,FBgn0031452,FBgn0031451,FBgn0085343,FBgn0031450,FBgn0051690,FBgn0053125,FBgn0250835,FBgn0031434,FBgn0026778,FBgn0031443,FBgn0031444,FBgn0031440,FBgn0026479
FBgn0264435	FBgn0000317,FBgn0028879,FBgn0001978,FBgn0028888,FBgn0001977,FBgn0259965,FBgn0028878,FBgn0010422,FBgn0041713,FBgn0053679,FBgn0053310,FBgn0051832,FBgn0262875,FBgn0004837,FBgn0024183,FBgn0262526,FBgn0260446
FBgn0264436	FBgn0004837,FBgn0262875,FBgn0028516,FBgn0260446,FBgn0024183,FBgn0262526,FBgn0028879,FBgn0001978,FBgn0028888,FBgn0000317,FBgn0051832,FBgn0001977,FBgn0259965,FBgn0010422,FBgn0028878,FBgn0041713,FBgn0053679
FBgn0264437	FBgn0032049,FBgn0260861,FBgn0032048,FBgn0028394,FBgn0032053,FBgn0032051,FBgn0001114,FBgn0263314,FBgn0032047,FBgn0011259,FBgn0032055,FBgn0016122,FBgn0032059,FBgn0250903,FBgn0032054,FBgn0004914,FBgn0085470,FBgn0032052,FBgn0032058,FBgn0032050,FBgn0032057
FBgn0264438	FBgn0086711,FBgn0004837,FBgn0028926,FBgn0260446,FBgn0040228,FBgn0024183,FBgn0262526,FBgn0028887,FBgn0261881,FBgn0028879,FBgn0261882,FBgn0000317,FBgn0001974,FBgn0051832,FBgn0053310,FBgn0010422,FBgn0028878,FBgn0001977,FBgn0053679,FBgn0041713,FBgn0259213
FBgn0264440	FBgn0032603,FBgn0032620,FBgn0086673,FBgn0040261,FBgn0261671,FBgn0052832,FBgn0040260,FBgn0051739,Novel000019,FBgn0040985,FBgn0051810,FBgn0051805,FBgn0260758,FBgn0032618,FBgn0032612,FBgn0266491,FBgn0000406,FBgn0032613,FBgn0032614,FBgn0032609,FBgn0004797,FBgn0266492,Novel000020,FBgn0051809,FBgn0264695,FBgn0085342,FBgn0040262,FBgn0026150,FBgn0032615,FBgn0022213
FBgn0264441	FBgn0041246,FBgn0032343,FBgn0040233,FBgn0020270,FBgn0032341,FBgn0032359,FBgn0027582,FBgn0040211,FBgn0028700,FBgn0262647,FBgn0032346,FBgn0032358,FBgn0014076,FBgn0052831,FBgn0264442,FBgn0051867,FBgn0010197,FBgn0032354,FBgn0032350,FBgn0259822,FBgn0032348,FBgn0040232,FBgn0261983,FBgn0032345
FBgn0264444	FBgn0031130,FBgn0083981,FBgn0003300,FBgn0031127,FBgn0031128,FBgn0031126,FBgn0031129,FBgn0085387,FBgn0052507
FBgn0264445	Novel000212,FBgn0040372,FBgn0025835,FBgn0025837,FBgn0025836,Novel000213,FBgn0040373,FBgn0029128
FBgn0264462	FBgn0036712,Novel000106,FBgn0260943,FBgn0036702,FBgn0036708,FBgn0036714,FBgn0036713,FBgn0036703,FBgn0036709,FBgn0036706,FBgn0015550,FBgn0036704,FBgn0036711,FBgn0036710,FBgn0036707,FBgn0036705
FBgn0264464	FBgn0036974,FBgn0036978,FBgn0024814,FBgn0265959,FBgn0011205,FBgn0036950,FBgn0036979,FBgn0036970,FBgn0036973,FBgn0036977,FBgn0036951,FBgn0260393,FBgn0036980,FBgn0052226,FBgn0052225,FBgn0036958,FBgn0250791,FBgn0001259,FBgn0036947,FBgn0052228,FBgn0036949,Novel000111,FBgn0001247,FBgn0036959,FBgn0053969,FBgn0262057,FBgn0036975,FBgn0036952,FBgn0262022,FBgn0260397,FBgn0259676,FBgn0027565,FBgn0003124,FBg…
FBgn0264466	FBgn0036707,FBgn0036705,FBgn0036710,FBgn0036704,FBgn0036711,FBgn0036714,FBgn0260943,FBgn0036702,FBgn0036708,FBgn0015550,FBgn0036706,FBgn0036713,FBgn0036703,FBgn0036709,Novel000106,FBgn0036712
FBgn0264467	Novel000111,FBgn0001247,FBgn0036959,FBgn0053969,FBgn0262057,FBgn0036975,FBgn0036952,FBgn0260397,FBgn0027565,FBgn0259676,FBgn0003124,FBgn0052227,FBgn0036953,FBgn0036962,FBgn0036964,FBgn0036984,FBgn0036956,FBgn0024887,FBgn0028978,FBgn0036969,FBgn0036967,FBgn0036974,FBgn0036978,FBgn0024814,FBgn0265959,FBgn0011205,FBgn0036979,FBgn0036970,FBgn0036973,FBgn0036977,FBgn0036980,FBgn0260393,FBgn0052226,FBg…
FBgn0264468	FBgn0036974,FBgn0036978,FBgn0024814,FBgn0265959,FBgn0036950,FBgn0036970,FBgn0036973,FBgn0036977,FBgn0036951,FBgn0260393,FBgn0052226,FBgn0036958,FBgn0052225,FBgn0250791,FBgn0036947,FBgn0052228,FBgn0036949,FBgn0036959,FBgn0261556,FBgn0262057,FBgn0036975,FBgn0036945,FBgn0036952,FBgn0262022,FBgn0260397,FBgn0259676,FBgn0052227,FBgn0003124,FBgn0036962,FBgn0036953,FBgn0036964,FBgn0036956,FBgn0024887,FBg…
FBgn0264469	FBgn0053288,FBgn0052442,FBgn0261953,FBgn0264561,FBgn0267849,FBgn0053290,Novel000113,FBgn0037093,FBgn0037102,FBgn0037101,FBgn0037107,FBgn0037105,FBgn0037109,FBgn0037099,FBgn0037081,FBgn0037086,FBgn0029152,FBgn0053289,FBgn0026371,FBgn0037094,FBgn0037092,FBgn0037098,FBgn0052441,FBgn0052438,FBgn0015239,FBgn0005694,FBgn0037108,FBgn0037100,FBgn0037085,FBgn0037083,FBgn0263911,FBgn0037087,FBgn0015283,FBg…
FBgn0264470	FBgn0037138,FBgn0037139,FBgn0037137,FBgn0046301,FBgn0037135,FBgn0022936,FBgn0037142,FBgn0262737,FBgn0000045,FBgn0000560,FBgn0037140,FBgn0052448,FBgn0037144,FBgn0037134,FBgn0029091,FBgn0037146,FBgn0264487,FBgn0037141
FBgn0264471	FBgn0262870,FBgn0052246,FBgn0035575,FBgn0035572,FBgn0085295,FBgn0262733,FBgn0052238,FBgn0035567,FBgn0035570,FBgn0042199,FBgn0046793,FBgn0035568,FBgn0015805,FBgn0035571,FBgn0035563,FBgn0035574,FBgn0035569
FBgn0264473	FBgn0261797,FBgn0262870,FBgn0042131,FBgn0085295,FBgn0035572,FBgn0035575,FBgn0035578,FBgn0027085,FBgn0046793,FBgn0035567,FBgn0035570,FBgn0042199,FBgn0035574,FBgn0035569,FBgn0035577,FBgn0052237,FBgn0035571,FBgn0035568
FBgn0264474	FBgn0035575,FBgn0085295,FBgn0035572,FBgn0035578,FBgn0027085,FBgn0261797,FBgn0262870,FBgn0042131,FBgn0035574,FBgn0035577,FBgn0035569,FBgn0035568,FBgn0035571,FBgn0035567,FBgn0035570,FBgn0042199,FBgn0046793,FBgn0052238
FBgn0264475	FBgn0000575,FBgn0035169,FBgn0035170,FBgn0035176,FBgn0035162,FBgn0035161,FBgn0054056,FBgn0035168,FBgn0035166,FBgn0054057,Novel000127,FBgn0035165,FBgn0028999,FBgn0052479,FBgn0260756,FBgn0035171,FBgn0035164,FBgn0035167,FBgn0260755,FBgn0035160,Novel000128,FBgn0035173,FBgn0264574
FBgn0264476	FBgn0035584,FBgn0035590,FBgn0035592,FBgn0263831,FBgn0040842,FBgn0035585,FBgn0040843,FBgn0035587,FBgn0035594,FBgn0035589,FBgn0035591,FBgn0035593,FBgn0028962,FBgn0035588,FBgn0052232,FBgn0035586,FBgn0005775
FBgn0264479	FBgn0036193,FBgn0052088,FBgn0036184,FBgn0052087,FBgn0052085,FBgn0036204,FBgn0036181,FBgn0036195,FBgn0036180,FBgn0036183,FBgn0041231,FBgn0052091,FBgn0036207,FBgn0036187,FBgn0036194,FBgn0036178,FBgn0036192,FBgn0036191,FBgn0015828,FBgn0261353,FBgn0036206,FBgn0036188,FBgn0261381,FBgn0036198,FBgn0036196,FBgn0262021,FBgn0036205,FBgn0036202,FBgn0040817,FBgn0036186,FBgn0036199,FBgn0042138,FBgn0086254,FBg…
FBgn0264480	FBgn0052447,FBgn0043783,FBgn0000560,FBgn0037121,FBgn0037129,FBgn0037114,FBgn0022936,FBgn0037110,FBgn0037137,FBgn0037131,FBgn0261059,FBgn0037122,FBgn0037130,FBgn0037115,FBgn0037120,FBgn0037133,FBgn0037116,FBgn0037123,FBgn0264711,FBgn0046301,FBgn0037135,FBgn0037127,FBgn0037126,FBgn0037124,FBgn0037128,FBgn0037117,FBgn0264487,FBgn0052445,FBgn0052448,FBgn0037125,FBgn0037134,FBgn0052446
FBgn0264481	FBgn0036925,FBgn0036920,FBgn0036910,FBgn0261506,FBgn0001324,FBgn0085287,FBgn0262518,FBgn0020887,FBgn0036916,FBgn0036915,FBgn0036924,FBgn0013799,FBgn0036929,FBgn0036928,FBgn0013303,FBgn0036911,FBgn0036926,FBgn0036922,FBgn0036921,FBgn0053710,FBgn0036919,FBgn0262519,FBgn0259148,FBgn0004852,FBgn0036923,FBgn0023094,FBgn0261507,FBgn0036927,FBgn0020389,FBgn0036913,FBgn0036918,FBgn0003744,FBgn0024889,FBg…
FBgn0264482	FBgn0036951,FBgn0036980,FBgn0260393,FBgn0052228,FBgn0001259,FBgn0036947,FBgn0052226,FBgn0250791,FBgn0036958,FBgn0052225,FBgn0011205,FBgn0036979,FBgn0036950,FBgn0024814,FBgn0036978,FBgn0036974,FBgn0265959,FBgn0036973,FBgn0036977,FBgn0036970,FBgn0036964,FBgn0003124,FBgn0052227,FBgn0259676,FBgn0027565,FBgn0036953,FBgn0036962,FBgn0036967,FBgn0024887,FBgn0036956,FBgn0036969,FBgn0036948,FBgn0261556,FBg…
FBgn0264483	FBgn0040801,FBgn0053689,FBgn0036592,FBgn0036595,FBgn0040799,FBgn0053796,FBgn0036577,FBgn0085276,FBgn0036600,FBgn0036576,FBgn0040798,FBgn0085277,FBgn0053687,FBgn0036588,FBgn0040797,FBgn0036589,FBgn0036585,FBgn0036580,FBgn0036599,FBgn0040796,FBgn0263605,FBgn0036571,FBgn0003076,FBgn0036596,FBgn0036598,FBgn0011016,FBgn0036574,FBgn0263608,FBgn0266724,FBgn0036583,FBgn0036591,FBgn0036584,FBgn0052152,FBg…
FBgn0264484	FBgn0026630,FBgn0053647,FBgn0036856,FBgn0036858,FBgn0040075,FBgn0016797,FBgn0036857,FBgn0003089,FBgn0259720,FBgn0266456,FBgn0017578,FBgn0036853,FBgn0036859,FBgn0260857,FBgn0036860,FBgn0028380,FBgn0036861,FBgn0036862
FBgn0264485	FBgn0036858,FBgn0052203,FBgn0053647,FBgn0026630,FBgn0036856,FBgn0036851,FBgn0036853,FBgn0017578,FBgn0266456,FBgn0036857,FBgn0016797,FBgn0040075,FBgn0003089,FBgn0259720,FBgn0260857,FBgn0036859,FBgn0036862,FBgn0036860,FBgn0028380,FBgn0036861
FBgn0264500	FBgn0040941,FBgn0083940,FBgn0263220,FBgn0259170,FBgn0030186,Novel000229,FBgn0030181,FBgn0030187,FBgn0264503,FBgn0028342,FBgn0085437,Novel000230,FBgn0030183,FBgn0040942
FBgn0264501	FBgn0033703,FBgn0263020,FBgn0033696,FBgn0033688,FBgn0085261,FBgn0050203,FBgn0033713,FBgn0033698,FBgn0000426,FBgn0033716,FBgn0033692,FBgn0261611,FBgn0033699,FBgn0262889,FBgn0033691,FBgn0050043,FBgn0266111,FBgn0000253,FBgn0020377,FBgn0264560,FBgn0033697,FBgn0033701,FBgn0033710,FBgn0050049,FBgn0023167,FBgn0033702,FBgn0050046,FBgn0033706,FBgn0033717,FBgn0033708,FBgn0014184,FBgn0040759,FBgn0033705,FBg…
FBgn0264504	FBgn0043005,FBgn0039102,FBgn0039107,FBgn0039108,FBgn0039110,FBgn0263782,FBgn0039094,FBgn0027512,FBgn0028684,FBgn0039106,FBgn0039113,FBgn0002922,FBgn0051145,FBgn0039099,FBgn0039093,FBgn0047351,FBgn0039117,FBgn0039092,FBgn0040227,FBgn0039120,FBgn0039111,FBgn0051413,FBgn0042106,FBgn0039098,FBgn0039101,FBgn0051148,FBgn0039114,FBgn0028475,FBgn0039118,FBgn0028691,FBgn0039116,FBgn0039112,FBgn0015513,FBg…
FBgn0264505	FBgn0263144,FBgn0050431,FBgn0033069,FBgn0033056,FBgn0050432,FBgn0033065,FBgn0033061,FBgn0033058,FBgn0033067,FBgn0033074,FBgn0040502,FBgn0021847,FBgn0000546,FBgn0033059,FBgn0033063,FBgn0033060,FBgn0033075,FBgn0033062,FBgn0033072,FBgn0262867
FBgn0264506	FBgn0086655,Novel000051,FBgn0033076,FBgn0262736,Novel000052,FBgn0053919
FBgn0264508	FBgn0033640,FBgn0033639,FBgn0033645,FBgn0010516,FBgn0050035,FBgn0033644,FBgn0044020,FBgn0040491,FBgn0086712,FBgn0000577,FBgn0033638,FBgn0033636,FBgn0062449,FBgn0033649,FBgn0085257,FBgn0033648
FBgn0264510	FBgn0033769,FBgn0033761,Novel000062,FBgn0050053,FBgn0033763,FBgn0053792,FBgn0028683,FBgn0045063,FBgn0033760,FBgn0003527,FBgn0053632,FBgn0033751,Novel000064,FBgn0033753,FBgn0053752,FBgn0011592,FBgn0061359,FBgn0033767,FBgn0033749,FBgn0033757,FBgn0261673,FBgn0053775,FBgn0011604,FBgn0033756,FBgn0050056,FBgn0033754,FBgn0266487,FBgn0033750,FBgn0050054,FBgn0033766,FBgn0050044,FBgn0004435,FBgn0033748,FBg…
FBgn0264511	FBgn0052351,FBgn0035907,FBgn0024236,FBgn0000121,FBgn0052029,FBgn0017429,FBgn0035921,FBgn0017579,FBgn0010825,FBgn0035917,FBgn0035901,FBgn0035911,FBgn0260442,FBgn0086348,FBgn0035900,FBgn0035915,FBgn0035922,FBgn0262508,FBgn0035914,FBgn0035918,FBgn0035916,FBgn0035909,FBgn0017430,FBgn0035904,FBgn0262719,FBgn0035903,FBgn0035906,FBgn0035902
FBgn0264512	FBgn0036353,FBgn0036354,FBgn0040814,FBgn0036349,FBgn0002573,FBgn0259970,FBgn0052119,FBgn0262623,FBgn0259971,FBgn0040813,FBgn0001256,FBgn0036350,FBgn0036352,FBgn0036348,FBgn0023095,FBgn0003034,FBgn0036351
FBgn0264513	FBgn0036349,FBgn0052119,FBgn0259970,FBgn0262623,FBgn0003034,FBgn0036348,FBgn0023095,FBgn0036352,FBgn0036350,FBgn0259971,FBgn0040813,FBgn0001256,FBgn0036351,FBgn0036353,FBgn0040814,FBgn0036354
FBgn0264514	FBgn0036349,FBgn0259970,FBgn0262623,FBgn0052119,FBgn0040814,FBgn0036350,FBgn0040813,FBgn0001256,FBgn0259971,FBgn0023095,FBgn0003034,FBgn0036348,FBgn0036351
FBgn0264515	FBgn0053262,FBgn0259971,FBgn0003034,FBgn0023095,FBgn0262623,FBgn0052119,FBgn0259970,FBgn0086916,FBgn0010452
FBgn0264517	FBgn0035479,FBgn0041147,FBgn0004895,FBgn0045478,FBgn0035471,FBgn0035484,FBgn0035476,FBgn0035475,FBgn0026592,FBgn0004880,FBgn0035486,FBgn0035468,FBgn0035470,FBgn0045477,FBgn0045479,FBgn0035473,FBgn0004910,FBgn0035477,FBgn0027552,FBgn0004875,FBgn0013751,FBgn0264516,FBgn0052255,FBgn0035478,FBgn0045476,FBgn0263832,FBgn0035469,FBgn0035482,FBgn0035483,FBgn0035488,FBgn0035481,FBgn0003943,FBgn0035480
FBgn0264518	FBgn0015585,FBgn0035470,FBgn0035462,FBgn0035481,FBgn0052266,FBgn0064227,FBgn0052263,FBgn0035480,FBgn0003943,FBgn0035464,FBgn0035469,FBgn0035475,FBgn0004888,FBgn0035461,FBgn0026592,FBgn0052262,FBgn0004880,FBgn0035468,FBgn0264516,FBgn0004875,FBgn0013751,FBgn0035476,FBgn0035471,FBgn0035478,FBgn0041147,FBgn0035479,FBgn0035473,FBgn0027552,FBgn0004910,FBgn0052264,FBgn0035477
FBgn0264539	FBgn0033815,FBgn0033799,FBgn0011763,FBgn0033809,FBgn0053138,FBgn0028991,FBgn0033808,FBgn0033794,FBgn0033792,FBgn0020391,FBgn0043010,FBgn0085468,FBgn0040754,FBgn0033819,FBgn0033802,FBgn0033814,FBgn0033807,FBgn0086532,FBgn0052843,FBgn0259876,FBgn0259219,FBgn0053137,FBgn0033821,FBgn0033826,FBgn0085264,FBgn0033813,FBgn0085341,FBgn0033816,FBgn0263998,FBgn0033827,FBgn0085344,FBgn0033818,FBgn0053182,FBg…
FBgn0264547	FBgn0031757,FBgn0015381,FBgn0001942,FBgn0001089,FBgn0040949,FBgn0043362,FBgn0000308,FBgn0031759,FBgn0259959,FBgn0003979,FBgn0261055,FBgn0086265,FBgn0001128,FBgn0031758,FBgn0001941,FBgn0031762,FBgn0086266,FBgn0031760,FBgn0031763,FBgn0085410,FBgn0001170,FBgn0031746,FBgn0031753,FBgn0031752,FBgn0031751,FBgn0031747,FBgn0031749,FBgn0003980,FBgn0031745,FBgn0031756,FBgn0031765,FBgn0002855,FBgn0265785,FBg…
FBgn0264548	FBgn0058439,FBgn0041004,FBgn0058006
FBgn0264549	FBgn0031536,FBgn0266670,FBgn0031538,FBgn0053123,FBgn0051954,FBgn0031548,FBgn0259949,FBgn0051776,FBgn0051956,FBgn0005616,FBgn0031534,FBgn0031529,FBgn0031542,FBgn0259950,FBgn0031530,FBgn0031549,FBgn0031531,FBgn0031550,FBgn0031545,FBgn0031547,FBgn0085204,FBgn0016698,FBgn0031533,FBgn0024244,FBgn0031540,FBgn0261560,FBgn0264363,FBgn0021967,FBgn0031546,FBgn0031535,FBgn0031544,FBgn0014396,FBgn0051952
FBgn0264550	FBgn0037038,FBgn0053286,FBgn0040637,FBgn0037042,FBgn0003415,FBgn0264552,FBgn0037031,FBgn0037039,FBgn0037036,FBgn0037037,FBgn0027055,FBgn0040636,FBgn0259243,FBgn0037035,FBgn0037030,FBgn0053287,FBgn0037040,FBgn0259972,FBgn0052432,FBgn0011591
FBgn0264551	FBgn0003415,FBgn0037036,FBgn0037039,FBgn0264552,FBgn0037028,FBgn0037031,FBgn0037038,FBgn0053286,FBgn0037042,FBgn0040637,FBgn0086915,FBgn0040636,FBgn0259243,FBgn0027055,FBgn0037037,FBgn0037027,FBgn0037030,FBgn0037035,FBgn0052432,FBgn0011591,FBgn0259972,FBgn0037040,FBgn0053287
FBgn0264553	FBgn0015585,FBgn0035470,FBgn0035462,FBgn0052263,FBgn0003943,FBgn0052266,FBgn0064227,FBgn0035469,FBgn0035464,FBgn0026592,FBgn0035468,FBgn0052262,FBgn0004888,FBgn0035461,FBgn0004875,FBgn0013751,FBgn0035458,FBgn0035471,FBgn0035473,FBgn0041147,FBgn0052264,FBgn0004910
FBgn0264554	FBgn0053290,FBgn0267849,FBgn0261953,FBgn0264561,FBgn0053288,FBgn0052442,Novel000113,FBgn0037093,FBgn0037101,FBgn0037102,FBgn0261258,FBgn0026371,FBgn0037086,FBgn0037081,FBgn0029152,FBgn0053289,FBgn0037099,FBgn0052438,FBgn0052441,FBgn0037094,FBgn0037098,FBgn0037092,FBgn0037087,FBgn0037100,FBgn0037085,FBgn0037083,FBgn0263911,FBgn0002842,FBgn0015239,FBgn0005694,FBgn0028663,FBgn0014143,FBgn0015283,FBg…
FBgn0264565	FBgn0264750,FBgn0032374,FBgn0000588,FBgn0026391,FBgn0264815,FBgn0040968,FBgn0259960,FBgn0265349,FBgn0051704,FBgn0259964,Novel000034,FBgn0259989,FBgn0259961,FBgn0266364,FBgn0259963,FBgn0032373,FBgn0259962,FBgn0032377,FBgn0032382,FBgn0261805,FBgn0026392,FBgn0026390,FBgn0032375,FBgn0266363,FBgn0032381,FBgn0032378,FBgn0020309,FBgn0032376
FBgn0264567	FBgn0037106,FBgn0014143,FBgn0015283,FBgn0028663,FBgn0043783,FBgn0037114,FBgn0037110,FBgn0037090,FBgn0052441,FBgn0037098,FBgn0037092,FBgn0037094,FBgn0052438,FBgn0037108,FBgn0015239,FBgn0037087,FBgn0037115,FBgn0263911,FBgn0037100,FBgn0037085,FBgn0037102,FBgn0264711,FBgn0037107,FBgn0037105,FBgn0037101,FBgn0037099,FBgn0037116,FBgn0037109,FBgn0026371,FBgn0053289,FBgn0029152,FBgn0037086,FBgn0052442,FBg…
FBgn0264568	FBgn0037099,FBgn0037116,FBgn0037109,FBgn0026371,FBgn0029152,FBgn0053289,FBgn0037102,FBgn0264711,FBgn0037107,FBgn0037105,FBgn0037101,FBgn0037117,FBgn0037093,Novel000113,FBgn0052442,FBgn0052445,FBgn0053290,FBgn0264561,FBgn0052446,FBgn0261953,FBgn0043783,FBgn0052447,FBgn0037114,FBgn0037110,FBgn0037090,FBgn0037106,FBgn0015283,FBgn0261059,FBgn0028663,FBgn0037108,FBgn0015239,FBgn0037115,FBgn0263911,FBg…
FBgn0264569	FBgn0058470,Novel000136,Novel000119,Novel000116,Novel000118,FBgn0264699
FBgn0264570	Novel000119,FBgn0058470,Novel000136,Novel000116,Novel000118
FBgn0264571	FBgn0036990,FBgn0036984,FBgn0024887,FBgn0028978,FBgn0037010,FBgn0037005,FBgn0036992,FBgn0027565,FBgn0259676,FBgn0037003,FBgn0037009,FBgn0036988,FBgn0036986,Novel000112,FBgn0037012,FBgn0036997,FBgn0029158,FBgn0037011,FBgn0037000,FBgn0037008,Novel000111,FBgn0052425,FBgn0001247,FBgn0053969,FBgn0037013,FBgn0036975,FBgn0036987,FBgn0052428,FBgn0036994,FBgn0036991,FBgn0261832,FBgn0036999,FBgn0001259,FBg…
FBgn0264572	FBgn0036986,Novel000112,FBgn0029158,FBgn0036997,FBgn0001247,Novel000111,FBgn0037000,FBgn0036975,FBgn0262057,FBgn0053969,FBgn0036969,FBgn0028978,FBgn0024887,FBgn0036990,FBgn0036984,FBgn0036967,FBgn0003124,FBgn0052227,FBgn0259676,FBgn0036992,FBgn0027565,FBgn0036988,FBgn0036964,FBgn0036970,FBgn0019947,FBgn0036977,FBgn0036973,FBgn0036993,FBgn0036978,FBgn0036974,FBgn0036979,FBgn0036998,FBgn0011205,FBg…
FBgn0264573	FBgn0085289,FBgn0037028,FBgn0037017,FBgn0086915,FBgn0037018,FBgn0037020,FBgn0259243,FBgn0016696,FBgn0037026,FBgn0037019,FBgn0001320,FBgn0037027,FBgn0037021,FBgn0037025,FBgn0037023,FBgn0037024,FBgn0037016,FBgn0037015,FBgn0027364,FBgn0045474,FBgn0037022,FBgn0037014,FBgn0040634,FBgn0262896,FBgn0053912
FBgn0264599	FBgn0033465,FBgn0033461,FBgn0050008,FBgn0033463,FBgn0085249,FBgn0033476,FBgn0263260,FBgn0013435,FBgn0033480,FBgn0033468,FBgn0033473,FBgn0033483,FBgn0000715,FBgn0027619,FBgn0033467,FBgn0033469,FBgn0010385,FBgn0050007,FBgn0011656,FBgn0265342,FBgn0033464,FBgn0033474,FBgn0033466,FBgn0033479,FBgn0033482,FBgn0033475,FBgn0033460,FBgn0040773,FBgn0033481,FBgn0262169,FBgn0022382,FBgn0033471,FBgn0261014,FBg…
FBgn0264600	FBgn0263602,FBgn0036566,FBgn0036552,FBgn0036551,FBgn0036569,FBgn0036565,FBgn0036547,FBgn0005536,FBgn0036570,FBgn0044028,FBgn0259824,FBgn0263601,FBgn0260635,FBgn0036568,FBgn0036553,FBgn0263599,FBgn0036544,FBgn0261634,FBgn0036567,FBgn0260646,FBgn0261633,FBgn0036563,FBgn0036556,FBgn0036560,FBgn0036546,FBgn0036557,FBgn0000115,FBgn0263600,FBgn0036549,FBgn0036550,FBgn0010280,FBgn0053258,FBgn0036545,FBg…
FBgn0264601	FBgn0036550,FBgn0010280,FBgn0053258,FBgn0036545,FBgn0000212,FBgn0000489,FBgn0262987,FBgn0263603,FBgn0036567,FBgn0260646,FBgn0036556,FBgn0036563,FBgn0261633,FBgn0036546,FBgn0036560,FBgn0036557,FBgn0263600,FBgn0000115,FBgn0036549,FBgn0260635,FBgn0263601,FBgn0259824,FBgn0044028,FBgn0036568,FBgn0036553,FBgn0263599,FBgn0036544,FBgn0261634,FBgn0263602,FBgn0036552,FBgn0036566,FBgn0036551,FBgn0036569,FBg…
FBgn0264602	FBgn0036545,FBgn0053258,FBgn0010280,FBgn0036550,FBgn0263603,FBgn0262987,FBgn0000489,FBgn0000212,FBgn0036563,FBgn0261633,FBgn0036556,FBgn0260646,FBgn0036567,FBgn0052152,FBgn0036549,FBgn0000115,FBgn0263600,FBgn0036557,FBgn0036575,FBgn0036560,FBgn0036546,FBgn0036571,FBgn0003076,FBgn0036568,FBgn0044028,FBgn0259824,FBgn0260635,FBgn0263601,FBgn0036574,FBgn0261634,FBgn0266724,FBgn0263599,FBgn0011016,FBg…
FBgn0264603	FBgn0028980,FBgn0035657,FBgn0035673,FBgn0035667,FBgn0042119,FBgn0086611,FBgn0035669,FBgn0040060,FBgn0035675,FBgn0035665,FBgn0061492,FBgn0053993,FBgn0035676,FBgn0020638,FBgn0002440,FBgn0005658,FBgn0035666,FBgn0035678,FBgn0020639,FBgn0035674,FBgn0052406,FBgn0259164,FBgn0035663,FBgn0020637,FBgn0035656,FBgn0035670,FBgn0035679,FBgn0035661,FBgn0035677,FBgn0250815
FBgn0264604	FBgn0035844,FBgn0259916,FBgn0035870,FBgn0035871,FBgn0250833,FBgn0035842,FBgn0035868,FBgn0035865,FBgn0035873,FBgn0035857,FBgn0040832,FBgn0027569,FBgn0085491,FBgn0264478,FBgn0035859,FBgn0035854,FBgn0020392,FBgn0035866,FBgn0035872,FBgn0015793,FBgn0035850,FBgn0035849,FBgn0035858,FBgn0265089,FBgn0035856,FBgn0263219,FBgn0002899,FBgn0035867,FBgn0010350,FBgn0035853,FBgn0035851,FBgn0035845,FBgn0087039,FBg…
FBgn0264616	FBgn0052000,FBgn0039896,FBgn0051998,FBgn0039897,FBgn0025740,FBgn0011747,FBgn0051999,FBgn0053978,FBgn0024811,FBgn0017545,FBgn0004859,FBgn0039889,FBgn0039890,FBgn0051997,FBgn0052006,FBgn0085432
FBgn0264617	FBgn0052000,FBgn0051997,FBgn0053978,FBgn0011747,FBgn0025740,FBgn0052006,FBgn0267363,FBgn0085432,FBgn0017545,FBgn0004859
FBgn0264618	FBgn0028996,FBgn0039911,FBgn0039914,Novel000192,FBgn0040324,FBgn0026869,FBgn0039909,FBgn0039908,Novel000198,FBgn0025936,FBgn0026262,Novel000193,FBgn0051992,Novel000194,FBgn0022361,FBgn0039916,Novel000195,Novel000196,Novel000197,FBgn0039915,FBgn0004607
FBgn0264674	FBgn0028331,FBgn0030186,FBgn0259170,FBgn0263220,FBgn0030191,FBgn0040941,FBgn0011770,FBgn0263997,FBgn0030183,FBgn0040942,FBgn0030189,FBgn0085437,FBgn0030187,FBgn0028342,FBgn0264503
FBgn0264675	FBgn0085352,FBgn0030367,FBgn0030362,FBgn0030375,FBgn0030365,Novel000231,FBgn0000808,FBgn0030374,FBgn0030376,FBgn0030373,FBgn0030359,FBgn0030366,FBgn0003865,FBgn0001083,FBgn0030369,FBgn0030370,FBgn0052656,Novel000232,FBgn0267001,FBgn0030377,FBgn0043001,FBgn0263111,FBgn0030361,Novel000233,FBgn0030360,FBgn0030364
FBgn0264676	FBgn0030369,FBgn0030370,FBgn0267001,FBgn0043001,FBgn0052656,Novel000232,FBgn0030361,FBgn0263111,FBgn0030364,Novel000233,FBgn0030360,FBgn0030367,FBgn0030362,FBgn0085352,FBgn0030365,FBgn0030375,FBgn0030374,FBgn0000808,Novel000231,FBgn0003865,FBgn0001083,FBgn0030376,FBgn0030373,FBgn0030366,FBgn0030359
FBgn0264677	FBgn0027279,FBgn0266848,FBgn0031188,FBgn0031196,FBgn0031189,FBgn0031194,FBgn0031187,FBgn0031195,FBgn0262866,FBgn0031184,FBgn0031190,FBgn0052499,FBgn0031183,FBgn0014395,FBgn0031191,FBgn0031197
FBgn0264678	FBgn0052647,FBgn0265523,FBgn0030421,FBgn0030411,FBgn0030418,FBgn0030409,FBgn0011837,FBgn0015024,FBgn0030408,FBgn0030410,FBgn0259171,FBgn0030412,FBgn0020513,FBgn0030425,FBgn0030417,FBgn0030420
FBgn0264697	FBgn0036872,FBgn0036874,FBgn0052208,FBgn0036875,FBgn0053062,FBgn0036877,FBgn0036868,FBgn0023395,FBgn0052214,FBgn0003089,FBgn0036870,FBgn0052213,FBgn0052206,FBgn0036871,FBgn0036876,FBgn0036873,Novel000132,FBgn0052212
FBgn0264698	Novel000115,FBgn0266347,FBgn0052350,FBgn0264492,FBgn0053217,FBgn0024733,FBgn0054031
FBgn0264700	Novel000101,FBgn0035131,FBgn0264707,FBgn0035139,FBgn0035137,FBgn0265574,FBgn0262139,FBgn0035134,FBgn0035132,FBgn0004373,FBgn0052343,FBgn0052344,FBgn0085293,FBgn0001316,FBgn0023000,FBgn0040291,FBgn0035138,FBgn0261985
FBgn0264701	FBgn0086706,FBgn0040321,FBgn0035948,FBgn0052026,FBgn0263930,FBgn0035951,FBgn0035955,FBgn0035949,FBgn0035943,FBgn0035956,FBgn0266757,FBgn0264307,FBgn0035952,FBgn0011787,FBgn0016070,FBgn0035947,FBgn0035936,FBgn0035953,FBgn0035944,FBgn0035942,FBgn0035941,FBgn0263199,FBgn0035934,FBgn0264305,FBgn0035945,FBgn0262788,FBgn0035954,FBgn0020633
FBgn0264702	FBgn0052847,FBgn0036481,FBgn0025776,FBgn0036465,FBgn0047338,FBgn0036484,FBgn0036468,FBgn0036485,FBgn0036470,FBgn0027088,FBgn0036487,FBgn0036486,FBgn0036490,FBgn0047178,FBgn0036469,FBgn0036466,FBgn0036476,FBgn0036480,FBgn0014002,FBgn0036488,FBgn0266452,FBgn0036489,FBgn0036479,FBgn0036483,FBgn0263762,FBgn0086690,FBgn0036474,FBgn0036467,FBgn0263761,FBgn0036482,FBgn0266441,FBgn0036463,FBgn0261090,FBg…
FBgn0264703	FBgn0036465,FBgn0036484,FBgn0047338,FBgn0036468,FBgn0036485,FBgn0052847,FBgn0036481,FBgn0025776,FBgn0036486,FBgn0047178,FBgn0036466,FBgn0036469,FBgn0036476,FBgn0036480,FBgn0027088,FBgn0036470,FBgn0036487,FBgn0266452,FBgn0036489,FBgn0036479,FBgn0036483,FBgn0023174,FBgn0263762,FBgn0086690,FBgn0036474,FBgn0036467,FBgn0036482,FBgn0266441,FBgn0263761,FBgn0014002,FBgn0036488,FBgn0261090,FBgn0036471,FBg…
FBgn0264704	FBgn0036467,FBgn0036474,FBgn0036482,FBgn0263761,FBgn0266441,FBgn0036483,FBgn0023174,FBgn0263762,FBgn0086690,FBgn0036489,FBgn0036479,FBgn0266452,FBgn0036488,FBgn0014002,FBgn0036462,FBgn0263763,FBgn0261090,FBgn0036471,FBgn0036463,FBgn0036468,FBgn0036485,FBgn0036484,FBgn0047338,FBgn0036465,FBgn0025776,FBgn0036481,FBgn0052847,FBgn0036480,FBgn0036476,FBgn0047178,FBgn0036466,FBgn0036469,FBgn0036486,FBg…
FBgn0264705	FBgn0260968,FBgn0262716,FBgn0042112,FBgn0035848,FBgn0028379,FBgn0035847,FBgn0011817,FBgn0264478,FBgn0020392,FBgn0040290,FBgn0035838,FBgn0035839,FBgn0026252,FBgn0262579,FBgn0027549,FBgn0035842,FBgn0029113,FBgn0010350,FBgn0026263,FBgn0035845,FBgn0002899,FBgn0035833,FBgn0259916,FBgn0260967,FBgn0035844
FBgn0264708	FBgn0037125,FBgn0052446,FBgn0261953,FBgn0052445,FBgn0037128,FBgn0037117,FBgn0037126,FBgn0037124,FBgn0037105,FBgn0037107,FBgn0037101,FBgn0037127,FBgn0037102,FBgn0264711,FBgn0037116,FBgn0037123,FBgn0037109,FBgn0037120,FBgn0052438,FBgn0052441,FBgn0037115,FBgn0037108,FBgn0037130,FBgn0037122,FBgn0261059,FBgn0037131,FBgn0037106,FBgn0037110,FBgn0043783,FBgn0052447,FBgn0037129,FBgn0037121,FBgn0037114
FBgn0264709	FBgn0037123,FBgn0037109,FBgn0037121,FBgn0037129,FBgn0037114,FBgn0037116,FBgn0043783,FBgn0052447,FBgn0037110,FBgn0264711,FBgn0037131,FBgn0037106,FBgn0037127,FBgn0261059,FBgn0037107,FBgn0037105,FBgn0037124,FBgn0037126,FBgn0037130,FBgn0037122,FBgn0037108,FBgn0037117,FBgn0037115,FBgn0037128,FBgn0052445,FBgn0037133,FBgn0261953,FBgn0052446,FBgn0037125,FBgn0037120
FBgn0264710	FBgn0037106,FBgn0037131,FBgn0264711,FBgn0261059,FBgn0037105,FBgn0037107,FBgn0037127,FBgn0052447,FBgn0043783,FBgn0037109,FBgn0037123,FBgn0037121,FBgn0037129,FBgn0037116,FBgn0037114,FBgn0037110,FBgn0052445,FBgn0037120,FBgn0037125,FBgn0037133,FBgn0261953,FBgn0052446,FBgn0037130,FBgn0037122,FBgn0037108,FBgn0037124,FBgn0037126,FBgn0037115,FBgn0037128,FBgn0037117
FBgn0264713	FBgn0030880,FBgn0030868,FBgn0030874,FBgn0030869,FBgn0030872,FBgn0000617,FBgn0052495,FBgn0030870,FBgn0030878,FBgn0030883,FBgn0024184,FBgn0052554,FBgn0030873,FBgn0026058,FBgn0030876,FBgn0027605,FBgn0259168,FBgn0030877,FBgn0003380,FBgn0030884,FBgn0030881,FBgn0030871,FBgn0052557,FBgn0030882
FBgn0264715	FBgn0003687,FBgn0034661,FBgn0259726,FBgn0034657,FBgn0034660,FBgn0259711,FBgn0050263,FBgn0259710,FBgn0034650,FBgn0054040,FBgn0264714,FBgn0050404,FBgn0259727,FBgn0034647,FBgn0034662,FBgn0266346,FBgn0085233,FBgn0034665,FBgn0034658,FBgn0010228,FBgn0260223,FBgn0004362,FBgn0259708,FBgn0034654,FBgn0034651,FBgn0050403,FBgn0034664,FBgn0050398,FBgn0042098,FBgn0050290,FBgn0034655,FBgn0260222,FBgn0259725,FBg…
FBgn0264716	FBgn0027360,FBgn0260222,FBgn0259725,FBgn0034663,FBgn0050395,FBgn0050285,FBgn0034666,FBgn0034649,FBgn0259709,FBgn0034659,FBgn0004362,FBgn0259708,FBgn0034654,FBgn0034664,FBgn0050403,FBgn0050398,FBgn0034651,FBgn0050290,FBgn0042098,FBgn0034667,FBgn0034655,FBgn0264714,FBgn0050404,FBgn0259727,FBgn0085233,FBgn0034662,FBgn0266346,FBgn0034658,FBgn0034665,FBgn0260223,FBgn0010228,FBgn0034661,FBgn0259726,FBg…
FBgn0264717	FBgn0000261,FBgn0001078,FBgn0040322,FBgn0036806,FBgn0036809,FBgn0036814,FBgn0036811,FBgn0036807,FBgn0260027,FBgn0042134,FBgn0040323,FBgn0036810,FBgn0036808,FBgn0036801,FBgn0036804,FBgn0085283,FBgn0036815,FBgn0052202,FBgn0259791,FBgn0036805,FBgn0036813,FBgn0036812
FBgn0264719	FBgn0036804,FBgn0036801,FBgn0085283,FBgn0036796,FBgn0013717,FBgn0052202,FBgn0259791,FBgn0036805,FBgn0036812,FBgn0036813,FBgn0265268,FBgn0001078,FBgn0040322,FBgn0052199,FBgn0036809,FBgn0036806,FBgn0003683,FBgn0036795,FBgn0036811,FBgn0036807,FBgn0260027,FBgn0052201,FBgn0040323,FBgn0042134,FBgn0036793,FBgn0036808,FBgn0036799,FBgn0036810
FBgn0264720	FBgn0020386,FBgn0002564,FBgn0035099,FBgn0040688,FBgn0035097,FBgn0052475,FBgn0262679,FBgn0263988,FBgn0035101
FBgn0264721	FBgn0061469,FBgn0036124,FBgn0036147,FBgn0036131,FBgn0052072,FBgn0036126,FBgn0025355,FBgn0263241,FBgn0036133,FBgn0036135,FBgn0052082,FBgn0052071,FBgn0036146,FBgn0014368,FBgn0036138,FBgn0036143,FBgn0020412,FBgn0064766,FBgn0052076,FBgn0036144,FBgn0036134,FBgn0036125,FBgn0054012,FBgn0261553,FBgn0003462,FBgn0010741,FBgn0041094,FBgn0036150,FBgn0036141,FBgn0036139,FBgn0266540,FBgn0260795,FBgn0036145,FBg…
FBgn0264722	FBgn0052062,FBgn0052058,FBgn0052061,FBgn0036083,FBgn0011802,FBgn0036082,FBgn0052064,FBgn0045770
FBgn0264723	FBgn0036273,FBgn0036260,FBgn0052100,FBgn0036263,FBgn0000594,FBgn0036272,FBgn0265455,FBgn0022709,FBgn0036277,FBgn0036262,FBgn0036271,FBgn0013997,FBgn0036266,FBgn0000592,FBgn0036278,FBgn0036259,FBgn0052105,FBgn0036258,FBgn0027843,FBgn0052099,FBgn0260941,FBgn0036264,FBgn0036274
FBgn0264724	FBgn0036491,FBgn0029114,FBgn0036492,FBgn0036494,FBgn0036495,FBgn0036493
FBgn0264726	FBgn0036236,FBgn0036230,FBgn0036235,FBgn0250825,FBgn0036242,FBgn0036237,FBgn0053265,FBgn0250876,FBgn0026432,FBgn0036248,FBgn0264488,FBgn0036225,FBgn0011723,FBgn0041096,FBgn0036229,FBgn0264725,FBgn0036246,FBgn0011335,FBgn0266100,FBgn0036224,FBgn0263647,FBgn0036249,FBgn0036226,FBgn0036232,FBgn0259748,FBgn0036250,FBgn0036227,FBgn0036228,FBgn0262986,FBgn0036240,FBgn0028573,FBgn0022959,FBgn0036239
FBgn0264727	FBgn0037146,FBgn0037153,FBgn0000100,FBgn0037149,FBgn0004514,FBgn0037147,FBgn0263249,FBgn0004414,FBgn0037151,FBgn0027532,FBgn0259973,Novel000133,FBgn0037150,FBgn0000045
FBgn0264786	FBgn0020378,FBgn0030148,FBgn0000233,FBgn0030151,FBgn0261931,FBgn0261617,FBgn0264691,FBgn0052698,FBgn0030141,FBgn0027084,FBgn0028341
FBgn0264787	FBgn0037431,FBgn0037445,FBgn0261789,FBgn0037436,FBgn0010282,FBgn0267698,FBgn0037442,FBgn0260766,FBgn0037447,FBgn0037428,FBgn0037433,FBgn0037448,FBgn0037429,FBgn0261641,FBgn0037446,FBgn0037430,FBgn0264495,FBgn0037440,FBgn0037443,FBgn0037439,FBgn0267690,FBgn0260645,FBgn0051560,FBgn0027514,FBgn0037427,FBgn0037435,FBgn0037432
FBgn0264791	FBgn0051128,FBgn0039210,FBgn0004118,FBgn0262167,FBgn0000036,FBgn0039204,FBgn0039201,FBgn0263490,FBgn0039203,FBgn0266758,FBgn0039209,FBgn0039202,FBgn0039207,FBgn0000039,FBgn0039205,FBgn0003134
FBgn0264792	FBgn0039667,FBgn0267106,FBgn0004369,FBgn0039666,FBgn0000492,FBgn0039668,FBgn0039663,FBgn0040623,FBgn0039665,FBgn0039669,FBgn0039664
FBgn0264793	FBgn0042696,FBgn0259214,FBgn0053481,FBgn0052850,FBgn0039890,FBgn0262636,FBgn0039889,FBgn0039904,FBgn0039900,FBgn0024811,FBgn0026777,FBgn0051999,FBgn0039897,FBgn0259216,FBgn0039902,FBgn0051998,FBgn0039896
FBgn0264794	Novel000192,FBgn0026262,FBgn0039908,FBgn0052850,Novel000198,FBgn0039907,FBgn0259214,Novel000195,FBgn0004607,Novel000196,Novel000197,Novel000193,FBgn0039904,FBgn0262636,Novel000194,FBgn0016126
FBgn0264818	FBgn0260748,FBgn0030838,FBgn0085356,FBgn0002709,FBgn0030824,FBgn0016080,FBgn0000163,FBgn0260747,FBgn0028974,FBgn0262111,FBgn0262101,FBgn0028581,FBgn0030814,FBgn0030828,FBgn0030817,FBgn0003057,FBgn0030833,FBgn0030823,FBgn0030836,FBgn0030829,FBgn0052563,FBgn0265267,FBgn0052564,FBgn0065032,FBgn0030830,FBgn0030816,FBgn0002590,FBgn0030832,FBgn0030815,FBgn0030834,FBgn0030826
FBgn0264819	FBgn0016126,Novel000194,FBgn0262636,FBgn0039900,Novel000193,FBgn0039904,Novel000197,FBgn0026777,Novel000196,FBgn0039902,Novel000195,FBgn0259214,FBgn0039907,Novel000198,FBgn0039908,FBgn0052850,FBgn0026262,Novel000192
FBgn0264821	FBgn0023213,FBgn0052016,FBgn0039939,FBgn0039938,FBgn0039932,FBgn0025726,FBgn0019985,FBgn0039936,FBgn0039937,FBgn0039923
FBgn0264822	FBgn0039932,FBgn0039929,FBgn0087002,FBgn0019650,FBgn0052016,FBgn0039930,FBgn0010217,FBgn0023213,FBgn0039936,FBgn0011642,FBgn0264607,FBgn0025741,FBgn0025726,FBgn0019985
FBgn0264823	FBgn0024913,FBgn0005561,FBgn0023213,FBgn0087002,FBgn0039929,FBgn0013749,FBgn0039927,FBgn0025741,FBgn0019985,FBgn0264607,FBgn0011642,FBgn0039930,FBgn0010217,FBgn0019650,FBgn0052016,FBgn0039928,FBgn0039932
FBgn0264824	FBgn0004863,FBgn0051438,FBgn0013984,FBgn0038887,FBgn0038886,FBgn0011278,FBgn0038889,FBgn0038888,FBgn0038892,FBgn0002941,FBgn0038890,FBgn0008651
FBgn0264825	FBgn0011278,FBgn0038889,FBgn0038892,FBgn0011766,FBgn0013984,FBgn0004863,FBgn0002941,FBgn0038890
FBgn0264826	FBgn0038890,FBgn0002941,FBgn0051176,FBgn0038892,FBgn0011766,FBgn0038894,FBgn0038893,FBgn0013984,FBgn0259113
FBgn0264827	FBgn0037750,FBgn0037751,FBgn0278604,FBgn0037765,FBgn0037760,FBgn0003886,FBgn0037756,Novel000177,FBgn0037734,FBgn0266720,FBgn0262104,FBgn0085438,FBgn0037757,FBgn0002431,FBgn0037753,FBgn0037759,FBgn0037739,FBgn0037744,FBgn0037737,FBgn0037741,FBgn0037754,FBgn0051415,FBgn0267336,FBgn0037747,FBgn0085331,FBgn0024330,FBgn0037743,FBgn0037758,FBgn0262477,FBgn0037742,FBgn0261599,FBgn0037763,FBgn0037766,FBg…
FBgn0264828	FBgn0263404,FBgn0038007,FBgn0003651,FBgn0038008,FBgn0037994,FBgn0037993,FBgn0264829,FBgn0011270,FBgn0038011,FBgn0037999,FBgn0259975,FBgn0038000,FBgn0261714,FBgn0037995,FBgn0037996,FBgn0037997,FBgn0038002,FBgn0038005,FBgn0038009,FBgn0037998,FBgn0038006,FBgn0038003,FBgn0264830,FBgn0038001,FBgn0038012
FBgn0264831	FBgn0266261,FBgn0264829,FBgn0038011,FBgn0001149,FBgn0003651,FBgn0038016,FBgn0038008,FBgn0038017,FBgn0263404,FBgn0038003,FBgn0038001,FBgn0264830,FBgn0042206,FBgn0037998,FBgn0037995,FBgn0037997,FBgn0038005,FBgn0038002,FBgn0037999,FBgn0259975,FBgn0038000,FBgn0037994,FBgn0011270,FBgn0038018,FBgn0038007,FBgn0038014,FBgn0038012,FBgn0038009,FBgn0038006,FBgn0037996,FBgn0038020,FBgn0038013
FBgn0264833	FBgn0015032,FBgn0039808,FBgn0039807,FBgn0039811,FBgn0039812,FBgn0039805,FBgn0027598,FBgn0039809,FBgn0004573,FBgn0039810,FBgn0051007,FBgn0039804,FBgn0051008,FBgn0039806,FBgn0053483,FBgn0020912,FBgn0003720,FBgn0062411,FBgn0000416
FBgn0264834	FBgn0058191,FBgn0267398,FBgn0262123,Novel000080
FBgn0264835	FBgn0267398,FBgn0262123,Novel000080
FBgn0264837	FBgn0039735,FBgn0039739,FBgn0266442,FBgn0039732,FBgn0039731,FBgn0039743,FBgn0039740,FBgn0039747,FBgn0039726,FBgn0039744,FBgn0039742,FBgn0001281,FBgn0086355,FBgn0026597,FBgn0039736,FBgn0001280,FBgn0041102,FBgn0039727,FBgn0003512,FBgn0003510,FBgn0260760,FBgn0039737,FBgn0003479,FBgn0039728,FBgn0002626,FBgn0004622,FBgn0085346,FBgn0085327,FBgn0051025,FBgn0039734,FBgn0039738,FBgn0016685,FBgn0051029,FBg…
FBgn0264838	FBgn0039734,FBgn0039748,FBgn0085327,FBgn0051025,FBgn0002626,FBgn0039728,FBgn0085346,FBgn0004622,FBgn0016685,FBgn0039738,FBgn0000032,FBgn0266443,FBgn0039733,FBgn0051029,FBgn0266411,FBgn0039741,FBgn0260468,FBgn0003511,FBgn0039730,FBgn0266442,FBgn0039735,FBgn0039739,FBgn0039743,FBgn0039731,FBgn0039740,FBgn0039747,FBgn0039732,FBgn0086355,FBgn0039742,FBgn0039744,FBgn0001281,FBgn0039736,FBgn0001280,FBg…
FBgn0264839	FBgn0028396,FBgn0265606,FBgn0038842,FBgn0038837,FBgn0004107,FBgn0044809,FBgn0053094,FBgn0038828,FBgn0259222,FBgn0038839,FBgn0038833,FBgn0259215,FBgn0044812,FBgn0038827,FBgn0051199,FBgn0051200,FBgn0051195,FBgn0038840,FBgn0038834,FBgn0038838,FBgn0038821,FBgn0051191,FBgn0019936,FBgn0044810,FBgn0051223,FBgn0051205,FBgn0038830,FBgn0046689,FBgn0027493,FBgn0038832,FBgn0038826,FBgn0038829
FBgn0264840	FBgn0028396,FBgn0002921,FBgn0044812,FBgn0038827,FBgn0038833,FBgn0259215,FBgn0038837,FBgn0038834,FBgn0038838,FBgn0038842,FBgn0038840,FBgn0038828,FBgn0038830,FBgn0053094,FBgn0044809,FBgn0013995,FBgn0051223,FBgn0044810,FBgn0019936,FBgn0051191,FBgn0038829,FBgn0038826,FBgn0038832,FBgn0027493,FBgn0038839
FBgn0264841	FBgn0040609,FBgn0039507,FBgn0039511,FBgn0039495,FBgn0010328,FBgn0261995,FBgn0039505,FBgn0051065,FBgn0002441,FBgn0005696,FBgn0039508,FBgn0015737,FBgn0039501,FBgn0039504,FBgn0051068,FBgn0039503,FBgn0039498,Novel000159,FBgn0042111,FBgn0010441,FBgn0003482,FBgn0004197,FBgn0039500,FBgn0011289,FBgn0260487,FBgn0085322,FBgn0039510,FBgn0051064,FBgn0261996,FBgn0046247,FBgn0039509
FBgn0264842	FBgn0261722,FBgn0036550,FBgn0052150,FBgn0036534,FBgn0036545,FBgn0036538,FBgn0036537,FBgn0263599,FBgn0040230,FBgn0036553,FBgn0015025,FBgn0000212,FBgn0000489,FBgn0264908,FBgn0036531,FBgn0036544,FBgn0036551,FBgn0036552,FBgn0036546,FBgn0036532,FBgn0036549,FBgn0036547,FBgn0263600,FBgn0000115,FBgn0036536
FBgn0264843	FBgn0263599,FBgn0040230,FBgn0036537,FBgn0000489,FBgn0000212,FBgn0015025,FBgn0264908,FBgn0036531,FBgn0036544,FBgn0261722,FBgn0036550,FBgn0036534,FBgn0052150,FBgn0036538,FBgn0036545,FBgn0036546,FBgn0036549,FBgn0036547,FBgn0036532,FBgn0036536
FBgn0264844	FBgn0039101,FBgn0051148,FBgn0039114,FBgn0039098,FBgn0051414,FBgn0039115,FBgn0039109,FBgn0015513,FBgn0039104,FBgn0039116,FBgn0028691,FBgn0039112,FBgn0085384,FBgn0039118,FBgn0028475,FBgn0053111,FBgn0047351,FBgn0039117,FBgn0051413,FBgn0042106,FBgn0039111,FBgn0039120,FBgn0040227,FBgn0039099,FBgn0039113,FBgn0051145,FBgn0002922,FBgn0039106,FBgn0039108,FBgn0039102,FBgn0039107,FBgn0043005,FBgn0028684,FBg…
FBgn0264857	FBgn0038462,FBgn0266917,FBgn0038458,FBgn0000014,FBgn0015230,FBgn0038465,FBgn0000015,FBgn0015008,FBgn0043069,FBgn0038460,FBgn0038463,FBgn0038461,FBgn0063261,FBgn0004577,FBgn0038467,FBgn0015011,FBgn0003944,FBgn0051274,FBgn0038466
FBgn0264864	FBgn0004507,FBgn0259192,FBgn0031384,FBgn0053543,FBgn0040718,FBgn0259230,FBgn0043539,FBgn0000097,FBgn0001125,FBgn0031393,FBgn0031388,FBgn0053516,FBgn0026396,FBgn0028952,FBgn0031392,FBgn0003557,FBgn0031389,FBgn0031390,FBgn0031391,FBgn0040717,FBgn0027509,FBgn0031379,FBgn0031381
FBgn0264865	FBgn0032911,FBgn0086251,FBgn0053509,FBgn0263051,FBgn0032924,FBgn0053508,FBgn0032915,FBgn0010100,FBgn0051624,FBgn0083972,FBgn0010395,FBgn0032923,FBgn0032929,FBgn0023388,FBgn0250867,FBgn0032921,FBgn0024371,FBgn0000239,FBgn0032922,FBgn0032914,FBgn0040297,FBgn0032919,FBgn0032925,FBgn0053511,FBgn0263050,FBgn0051988,FBgn0032916,FBgn0053510,FBgn0026255,FBgn0051627,FBgn0011829,FBgn0032910,FBgn0032913
FBgn0264866	FBgn0000547,FBgn0001075,FBgn0014033,FBgn0031585,FBgn0051961,FBgn0031590,FBgn0265269,FBgn0031589,FBgn0031592,FBgn0026394,FBgn0020376,FBgn0040102,FBgn0010473,FBgn0003941
FBgn0264867	FBgn0031585,FBgn0001075,FBgn0031590,FBgn0265269,FBgn0051961,FBgn0020762,FBgn0026394,FBgn0031589,FBgn0028482,FBgn0031592,FBgn0003941,FBgn0010473,FBgn0040102
FBgn0264868	FBgn0020762,FBgn0026394,FBgn0031589,FBgn0028482,FBgn0031592,FBgn0003941,FBgn0040102,FBgn0010473,FBgn0031585,FBgn0001075,FBgn0031590,FBgn0265269,FBgn0051961
FBgn0264869	FBgn0046113,FBgn0053526,FBgn0031284,FBgn0010583,FBgn0002936,FBgn0000442,FBgn0041250,FBgn0031281,FBgn0031277,FBgn0031279,FBgn0031292,FBgn0029095,FBgn0020305,FBgn0031276,FBgn0031285,FBgn0031283,FBgn0031282,FBgn0031286,FBgn0031288,FBgn0020304,FBgn0051658,FBgn0031287,FBgn0031275,FBgn0002563,FBgn0031289,FBgn0086130,FBgn0020545,FBgn0015621,FBgn0028481,FBgn0040725
FBgn0264870	FBgn0031287,FBgn0020304,FBgn0031288,FBgn0020545,FBgn0015621,FBgn0002563,FBgn0031289,FBgn0086130,FBgn0028481,FBgn0010583,FBgn0002936,FBgn0046113,FBgn0031284,FBgn0053526,FBgn0031281,FBgn0020305,FBgn0031285,FBgn0031283,FBgn0031294,FBgn0031292,FBgn0029095,FBgn0031286,FBgn0031282
FBgn0264873	FBgn0051935,FBgn0001174,FBgn0026397,FBgn0031344,FBgn0051928,FBgn0031347,FBgn0263321,FBgn0053128,FBgn0264881,FBgn0031345,FBgn0263320,FBgn0031343,FBgn0261509,FBgn0002543,FBgn0051661,FBgn0026398,FBgn0051926
FBgn0264875	FBgn0085201,FBgn0031401,FBgn0031407,FBgn0250841,FBgn0004507,FBgn0264979,FBgn0031409,FBgn0051682,FBgn0052463,FBgn0262126,FBgn0027509,FBgn0054049,FBgn0031399,FBgn0053124,FBgn0053516,FBgn0085203,FBgn0031406,FBgn0011832,FBgn0051681,FBgn0031393,FBgn0042186,FBgn0259717,FBgn0031395,FBgn0267378,FBgn0000097,FBgn0031398,FBgn0051668,FBgn0042187,FBgn0031391,FBgn0031390,FBgn0261523,FBgn0010288,FBgn0031403,FBg…
FBgn0264876	FBgn0025578,FBgn0035050,FBgn0035057,FBgn0023181,FBgn0035069,FBgn0028738,FBgn0035056,FBgn0035049,FBgn0265182,FBgn0035073,FBgn0041205,FBgn0086908,FBgn0035063,FBgn0050423,FBgn0035070,FBgn0027590,FBgn0035059,FBgn0265193,Novel000074,FBgn0015801,FBgn0053988,FBgn0040666,FBgn0050421,Novel000076,FBgn0000157,Novel000075,FBgn0035064,FBgn0262098,FBgn0035060,FBgn0035065,FBgn0035068
FBgn0264877	FBgn0263593,FBgn0260398,FBgn0021995,FBgn0033272,FBgn0033274,FBgn0028562,FBgn0025469,FBgn0033277,FBgn0010109,FBgn0021814,FBgn0050373,FBgn0033266,Novel000053,FBgn0005648,FBgn0053087,FBgn0085246,FBgn0033268,FBgn0010504,FBgn0033252,FBgn0040778,FBgn0033259,FBgn0033260,FBgn0033271,FBgn0260390,FBgn0265632,FBgn0033265,FBgn0033273,FBgn0033275,FBgn0033257,FBgn0011659,FBgn0020279,FBgn0028563,FBgn0033258,FBg…
FBgn0264878	FBgn0033427,FBgn0033421,FBgn0033422,FBgn0033423,FBgn0010342,FBgn0050339,FBgn0033426,FBgn0259246,FBgn0033438,FBgn0050340,FBgn0050338,FBgn0033440,FBgn0261016,FBgn0085436,FBgn0033437,FBgn0023143,FBgn0033429,FBgn0260474,FBgn0033439,FBgn0033428,FBgn0025286,FBgn0010316,FBgn0050005,FBgn0033434,FBgn0050000,FBgn0033431,Novel000058
FBgn0264879	FBgn0261016,FBgn0033440,FBgn0050340,FBgn0050338,FBgn0033438,FBgn0259246,FBgn0259678,FBgn0033426,FBgn0050339,FBgn0010342,FBgn0033423,FBgn0033422,FBgn0033421,FBgn0033427,FBgn0050000,Novel000058,FBgn0033431,FBgn0033434,FBgn0050005,FBgn0025286,FBgn0010316,FBgn0033439,FBgn0260474,FBgn0033428,FBgn0033429,FBgn0023143,FBgn0033437,FBgn0085436
FBgn0264880	FBgn0033159,FBgn0033170,FBgn0033164,FBgn0033166,FBgn0033158,FBgn0033155,FBgn0033153,FBgn0033160,FBgn0260991,FBgn0003174,FBgn0003460,FBgn0033165,FBgn0033162,FBgn0026602,FBgn0262948,FBgn0041243,FBgn0033169,FBgn0000352,FBgn0033168,FBgn0033154,FBgn0033167,FBgn0262583
FBgn0264882	FBgn0031372,FBgn0051664,FBgn0045497,FBgn0031364,FBgn0027597,FBgn0031367,FBgn0045500,FBgn0051933,FBgn0031374,FBgn0031365,FBgn0051663,FBgn0051665,FBgn0045498,FBgn0265138,FBgn0031373,FBgn0041249,FBgn0045501,FBgn0264494
FBgn0264883	FBgn0027597,FBgn0031367,FBgn0045500,FBgn0031374,FBgn0051933,FBgn0031372,FBgn0051664,FBgn0045497,FBgn0031364,FBgn0264494,FBgn0045501,FBgn0041249,FBgn0031365,FBgn0051663,FBgn0051665,FBgn0045498,FBgn0031373,FBgn0265138
FBgn0264884	FBgn0265138,FBgn0031373,FBgn0045498,FBgn0051665,FBgn0051663,FBgn0040719,FBgn0045501,FBgn0031375,FBgn0045497,FBgn0051664,FBgn0031372,FBgn0051933,FBgn0031374,FBgn0045500,FBgn0053673,FBgn0031367
FBgn0264885	FBgn0051958,FBgn0004567,FBgn0051773,FBgn0031573,FBgn0031574,FBgn0031568,FBgn0040104,FBgn0051960,FBgn0000256,FBgn0003386,FBgn0031566,FBgn0021800,FBgn0031571,FBgn0004893,FBgn0263846,FBgn0031575,FBgn0263842,FBgn0051774,FBgn0003430,FBgn0051957
FBgn0264886	FBgn0004893,FBgn0263846,FBgn0021800,FBgn0031571,FBgn0051957,FBgn0031575,FBgn0263842,FBgn0051774,FBgn0003430,FBgn0040104,FBgn0051960,FBgn0051958,FBgn0051773,FBgn0004567,FBgn0031573,FBgn0031574,FBgn0031568,FBgn0000256,FBgn0003386
FBgn0264887	FBgn0051960,FBgn0051773,FBgn0031573,FBgn0004567,FBgn0051958,FBgn0031574,FBgn0000256,FBgn0263846,FBgn0004893,FBgn0021800,FBgn0031571,FBgn0051957,FBgn0031575,FBgn0051774,FBgn0003430,FBgn0263842
FBgn0264889	FBgn0003941,FBgn0040102,FBgn0010473,FBgn0026394,FBgn0020762,FBgn0031589,FBgn0028482,FBgn0031592,FBgn0031590,FBgn0265269,FBgn0051961,FBgn0031596,FBgn0001075
FBgn0264890	FBgn0031857,FBgn0051632,FBgn0031861,FBgn0031858,FBgn0031868,FBgn0042092,FBgn0031860,FBgn0031866,FBgn0086451,FBgn0265257,FBgn0031854,FBgn0031855,FBgn0031865,FBgn0011737,FBgn0025777,FBgn0017551,FBgn0025595,FBgn0015777,FBgn0031859,FBgn0046704,FBgn0042189,FBgn0031853,FBgn0051910,FBgn0031851,FBgn0015776,FBgn0031856
FBgn0264891	FBgn0264895,FBgn0031912,FBgn0025697,Novel000015,FBgn0260486,FBgn0031918,FBgn0031920,FBgn0011283,FBgn0031925,FBgn0031926,FBgn0031913,FBgn0031914,FBgn0045495,FBgn0028387,FBgn0083141,FBgn0041247
FBgn0264893	FBgn0027106,FBgn0029931,FBgn0029925,FBgn0261284,FBgn0000330,FBgn0264270,FBgn0029930,Novel000218,Novel000219,FBgn0004143,FBgn0052732,FBgn0027108,FBgn0029922,Novel000220,FBgn0029928,FBgn0004646,FBgn0259204,FBgn0052736,FBgn0029929,FBgn0029924,FBgn0029932
FBgn0264896	FBgn0038909,FBgn0045468,FBgn0053092,FBgn0038915,FBgn0038914,FBgn0051233,FBgn0038919,FBgn0064912,FBgn0038901,FBgn0013759,FBgn0051174,FBgn0038917,FBgn0003867,FBgn0051465,FBgn0067317,FBgn0027575,FBgn0038903,FBgn0045470,FBgn0260940,FBgn0259237,FBgn0038902,FBgn0051431,FBgn0038918,FBgn0045469,FBgn0041229,FBgn0051343,FBgn0083984,FBgn0038916,FBgn0015229,FBgn0038912,FBgn0264426,FBgn0051198
FBgn0264898	FBgn0267648,FBgn0266178,FBgn0261845,FBgn0267652,FBgn0267650,FBgn0266174,FBgn0004863,FBgn0261842,FBgn0002781,FBgn0261844,FBgn0004110,FBgn0038890,FBgn0261843,FBgn0266173,FBgn0038881,FBgn0266176,FBgn0261839,FBgn0038886,FBgn0038888,FBgn0266171,FBgn0038889,FBgn0261841,FBgn0266177,FBgn0004862,FBgn0267651,FBgn0008651,FBgn0051438,FBgn0266170,FBgn0011278,FBgn0261838,FBgn0266175,FBgn0267649,FBgn0261837,FBg…
FBgn0264900	FBgn0039861,FBgn0039858,FBgn0043900,Novel000164,FBgn0039856,FBgn0270927,FBgn0000557,FBgn0039854,FBgn0039863,FBgn0003065,FBgn0261583,FBgn0039875,FBgn0039873,FBgn0261479,FBgn0003268,FBgn0039870,FBgn0039862,FBgn0039859,FBgn0017448,FBgn0039864,FBgn0039869,FBgn0039860,FBgn0039855,FBgn0000150,FBgn0039876,FBgn0011655,FBgn0039868,FBgn0039867,FBgn0003870,FBgn0005632,FBgn0039857,FBgn0022349,FBgn0039872
FBgn0264901	FBgn0051133,FBgn0039177,FBgn0011785,FBgn0086365,FBgn0026598,FBgn0026257,FBgn0029503,FBgn0028471,FBgn0039159,FBgn0039163,FBgn0039165,FBgn0039158,FBgn0039172,FBgn0043884,FBgn0039180,FBgn0039170,FBgn0019952,FBgn0039155,FBgn0085319,FBgn0263398,FBgn0039156,FBgn0259685,FBgn0039167,FBgn0039182,FBgn0039161,FBgn0039157,FBgn0011725,FBgn0266673,FBgn0039175,FBgn0026317,FBgn0039154,FBgn0039178,FBgn0266282,FBg…
FBgn0264902	FBgn0261261,FBgn0037350,FBgn0037359,FBgn0037351,FBgn0015324,FBgn0027497,FBgn0041191,FBgn0037356,FBgn0037370,FBgn0044823,FBgn0250753,FBgn0017550,FBgn0037368,FBgn0037339,FBgn0051551,FBgn0037340,FBgn0051546,FBgn0037363,FBgn0037342,FBgn0037365,FBgn0027608,FBgn0266672,FBgn0037372,FBgn0046222,FBgn0262125,FBgn0037354,FBgn0037364,FBgn0037344,FBgn0037371,FBgn0037345,FBgn0037358,FBgn0010772,FBgn0051548,FBg…
FBgn0264904	FBgn0038248,FBgn0038237,FBgn0025808,FBgn0038239,FBgn0038238,FBgn0086686,FBgn0038247,FBgn0038251,FBgn0020299,FBgn0038243,FBgn0038246,FBgn0038241,FBgn0038233,FBgn0265140,FBgn0085302,FBgn0038236,FBgn0038244,FBgn0086901,FBgn0038235,FBgn0038250,FBgn0003169,FBgn0051313,FBgn0038240,FBgn0264903,FBgn0004629,FBgn0013981,FBgn0038234,FBgn0038252,FBgn0038242
FBgn0264905	FBgn0038897,FBgn0261060,FBgn0038903,FBgn0051176,FBgn0262143,FBgn0259237,FBgn0038902,FBgn0051233,FBgn0038893,FBgn0038894,FBgn0038901,FBgn0259113,FBgn0013759,FBgn0051343,FBgn0011766,FBgn0051198,FBgn0003867,FBgn0262144,FBgn0027575,FBgn0054034
FBgn0264906	FBgn0039153,FBgn0039140,FBgn0053100,FBgn0039139,FBgn0043455,FBgn0039137,FBgn0051184,FBgn0051133,FBgn0026576,FBgn0039136,FBgn0053108,FBgn0015795,FBgn0039156,FBgn0039150,FBgn0039132,FBgn0039152,FBgn0005674,FBgn0039155,FBgn0020647,FBgn0051140,FBgn0040283,FBgn0266673,FBgn0039135,FBgn0039149,FBgn0039145,FBgn0001230,FBgn0039157,FBgn0039151,FBgn0039141,FBgn0264325,FBgn0005649,FBgn0013343,FBgn0015765,FBg…
FBgn0264909	FBgn0260799,FBgn0040007,FBgn0260798,FBgn0046692
FBgn0264912	FBgn0051538,FBgn0250746,FBgn0037310,FBgn0037328,FBgn0264785,FBgn0037329,FBgn0037320,Novel000142,FBgn0037326,FBgn0037324,FBgn0037315,FBgn0051542,FBgn0037317,FBgn0037313,FBgn0264712,FBgn0037327,FBgn0037322,FBgn0013576,FBgn0003275,FBgn0085306,FBgn0041707,FBgn0086695,FBgn0037325,FBgn0037323,FBgn0037312,FBgn0001311
FBgn0264914	FBgn0040849,Novel000086,Novel000085,FBgn0026238,FBgn0033005,FBgn0013348
FBgn0264915	FBgn0044809,FBgn0038828,FBgn0038830,FBgn0053094,FBgn0051191,FBgn0013995,FBgn0044810,FBgn0051223,FBgn0019936,FBgn0038829,FBgn0038839,FBgn0038832,FBgn0027493,FBgn0028396,FBgn0002921,FBgn0044812,FBgn0038827,FBgn0259215,FBgn0038833,FBgn0038834,FBgn0038838,FBgn0038837,FBgn0263400,FBgn0038842,FBgn0038845,FBgn0038840
FBgn0264916	FBgn0051475,FBgn0025680,FBgn0038680,FBgn0259705,FBgn0002962,FBgn0016120,FBgn0038693,FBgn0004876,FBgn0038678,FBgn0038685,FBgn0038692,Novel000184,FBgn0259704,FBgn0038679,FBgn0038686,FBgn0038690,FBgn0038681,FBgn0038683,FBgn0038694,FBgn0010768,FBgn0261285,FBgn0038691,FBgn0038682,FBgn0267975
FBgn0264939	FBgn0029826,FBgn0027546,FBgn0029819,FBgn0029824,FBgn0052755,FBgn0029831,FBgn0029821,FBgn0005390,FBgn0029816,FBgn0029828,FBgn0029818,FBgn0029823,FBgn0052756,FBgn0014340,FBgn0029820,FBgn0029827,FBgn0029813,FBgn0029817,FBgn0029830,FBgn0029814,FBgn0262611,FBgn0000042,FBgn0262610,FBgn0029822,FBgn0029003,FBgn0029825
FBgn0264940	FBgn0000719,FBgn0031201,FBgn0259677
FBgn0264941	FBgn0030573,FBgn0030574,FBgn0015773,FBgn0052600,FBgn0030569,FBgn0030571,FBgn0030572,FBgn0030570
FBgn0264942	FBgn0030067,FBgn0030065,Novel000227,FBgn0030073,FBgn0030066,FBgn0011661,FBgn0011586,FBgn0030071,FBgn0030074,FBgn0261549,FBgn0262900
FBgn0264943	FBgn0031430,FBgn0085343,FBgn0250835,FBgn0031434,FBgn0026778,FBgn0026479,FBgn0031440,FBgn0031436,FBgn0000490,FBgn0263322,FBgn0264978,FBgn0031435,FBgn0031437,FBgn0031432,FBgn0041337,FBgn0031431,FBgn0011818
FBgn0264944	FBgn0250835,FBgn0031434,FBgn0026778,FBgn0031443,FBgn0031440,FBgn0026479,FBgn0085343,FBgn0031430,FBgn0053125,FBgn0026395,FBgn0263322,FBgn0031436,FBgn0000490,FBgn0031432,FBgn0031437,FBgn0041337,FBgn0264978,FBgn0031435,FBgn0031442,FBgn0031431,FBgn0264433,FBgn0031441,FBgn0011818
FBgn0264948	FBgn0028665,Novel000214,FBgn0021738,FBgn0086899,FBgn0265575,FBgn0015286,FBgn0029676,FBgn0028491,FBgn0000542,FBgn0029679,FBgn0260484,FBgn0264954,FBgn0029681,FBgn0023215,FBgn0260658
FBgn0264949	FBgn0029676,FBgn0015286,FBgn0265575,Novel000214,FBgn0028665,FBgn0021738,FBgn0086899,FBgn0260658,FBgn0029681,FBgn0264954,FBgn0029679,FBgn0028491,FBgn0260484,FBgn0000542
FBgn0264951	FBgn0032000,FBgn0262359,FBgn0003502,FBgn0031998,FBgn0261830,FBgn0015299,FBgn0032005,FBgn0028987,FBgn0083970,FBgn0261831,FBgn0032004,FBgn0031990,FBgn0032008,FBgn0032006,FBgn0031988,FBgn0031985,FBgn0032003,FBgn0032002,FBgn0003607,FBgn0263256,FBgn0031995,FBgn0261822,FBgn0261064,FBgn0032014,FBgn0032010,FBgn0264953,FBgn0031996,FBgn0261020,FBgn0031992,FBgn0032001,FBgn0032013,FBgn0031997,FBgn0051606,FBg…
FBgn0264952	FBgn0032002,FBgn0263256,FBgn0003607,FBgn0031995,FBgn0261822,FBgn0261064,FBgn0032014,FBgn0264953,FBgn0032010,FBgn0031996,FBgn0261020,FBgn0032001,FBgn0031992,FBgn0031997,FBgn0051606,FBgn0031987,FBgn0032013,FBgn0031999,FBgn0031986,FBgn0032000,FBgn0262359,FBgn0003502,FBgn0261830,FBgn0031998,FBgn0015299,FBgn0032005,FBgn0028987,FBgn0032004,FBgn0083970,FBgn0261831,FBgn0031990,FBgn0032006,FBgn0032008,FBg…
FBgn0264956	FBgn0033047,FBgn0002774,FBgn0033048,FBgn0033043,FBgn0085414,FBgn0265631,FBgn0264959,FBgn0033042,FBgn0263855,FBgn0033041,FBgn0263109
FBgn0264957	FBgn0085414,FBgn0033050,FBgn0265631,FBgn0264959,FBgn0263109,FBgn0263855,FBgn0033054,FBgn0033051,FBgn0033047,FBgn0033052,FBgn0033048,FBgn0002774,FBgn0000043
FBgn0264958	FBgn0002774,FBgn0085240,FBgn0033047,FBgn0033056,FBgn0264959,FBgn0033050,FBgn0033058,FBgn0085241,FBgn0033055,FBgn0263855,FBgn0033048,FBgn0033052,FBgn0033051,FBgn0000043,FBgn0265631,FBgn0033054,FBgn0263109
FBgn0264960	FBgn0052569,FBgn0030799,FBgn0030800,FBgn0030791,FBgn0030795,FBgn0030804,FBgn0030788,FBgn0030796,FBgn0027556,FBgn0001250,FBgn0053252,FBgn0030786,FBgn0030798,FBgn0030790,FBgn0030803,FBgn0030787,FBgn0030793,FBgn0024941,FBgn0052568,FBgn0030794,FBgn0052572,FBgn0030797,FBgn0027528,FBgn0030792,FBgn0052571,FBgn0030789,FBgn0052574,FBgn0030802,Novel000236,FBgn0030801,FBgn0052570,FBgn0085354
FBgn0264980	FBgn0033063,FBgn0033059,FBgn0000043,FBgn0033060,FBgn0033052,FBgn0000546,FBgn0033051,FBgn0033054,FBgn0033062,FBgn0002774,FBgn0085240,FBgn0033056,FBgn0033058,FBgn0263855,FBgn0085241,FBgn0033055,FBgn0033050,FBgn0264959,FBgn0033061
FBgn0264982	FBgn0052856,FBgn0027948,FBgn0038386,FBgn0026059,FBgn0266566,FBgn0038385,FBgn0052855,FBgn0003117,FBgn0038380,FBgn0038397,FBgn0038389,FBgn0013334,FBgn0038398,FBgn0038391,FBgn0038381,FBgn0003507,FBgn0038390,FBgn0085305,FBgn0051088,FBgn0038396,FBgn0038394,Novel000182,FBgn0038387,FBgn0038388,FBgn0002783,FBgn0027657,FBgn0024222,FBgn0022787,FBgn0038395
FBgn0264983	FBgn0037236,FBgn0051528,FBgn0085386,FBgn0086605,FBgn0037242,FBgn0085454,FBgn0037252,FBgn0003882,FBgn0051526,FBgn0052944,FBgn0263594,FBgn0037238,FBgn0037241,FBgn0037235,FBgn0261434,FBgn0037240,FBgn0037248,FBgn0037249,FBgn0051525,FBgn0037250,FBgn0037239,FBgn0051523,FBgn0086608,FBgn0051522,FBgn0037251,FBgn0037244,FBgn0037255,FBgn0037254
FBgn0264984	FBgn0037972,FBgn0260744,FBgn0037985,FBgn0037976,FBgn0260231,FBgn0260742,FBgn0260741,FBgn0037981,FBgn0037960,FBgn0037964,FBgn0013276,FBgn0037958,FBgn0037987,FBgn0051358,FBgn0037986,FBgn0037974,FBgn0037962,FBgn0037963,FBgn0037978,FBgn0003312,FBgn0013275,FBgn0000147,FBgn0037970,FBgn0260230,FBgn0037988,FBgn0037980,FBgn0260745,FBgn0085336,FBgn0037973,FBgn0051368,FBgn0051211,FBgn0260746,FBgn0260743,FBg…
FBgn0264985	FBgn0027654,FBgn0039789,FBgn0085461,FBgn0051013,FBgn0039795,FBgn0039787,FBgn0051017,FBgn0039796,FBgn0051021,FBgn0083991,FBgn0039788,FBgn0051016,FBgn0000274,FBgn0051010,FBgn0085462,FBgn0039792,FBgn0051019,FBgn0039790,FBgn0266259,FBgn0051015,FBgn0082582
FBgn0264986	FBgn0042110,FBgn0037916,FBgn0037917,Novel000148,FBgn0037912,FBgn0037939,FBgn0037942,FBgn0037937,FBgn0037926,FBgn0037910,FBgn0037922,FBgn0037940,FBgn0053512,FBgn0037924,FBgn0002906,FBgn0037931,FBgn0037930,FBgn0037920,FBgn0265271,FBgn0037923,FBgn0263316,FBgn0037918,FBgn0259227,FBgn0037933,FBgn0037921,FBgn0037935,FBgn0051363,FBgn0025821,FBgn0037934,FBgn0042205,FBgn0037911,FBgn0262081,FBgn0037913,FBg…
FBgn0264987	FBgn0266455,FBgn0038140,FBgn0038156,FBgn0038131,FBgn0038147,FBgn0259831,FBgn0038139,FBgn0264991,FBgn0038148,FBgn0038150,FBgn0023495,FBgn0052473,FBgn0053977,FBgn0038143,FBgn0038145,FBgn0038144,FBgn0038136,FBgn0038134,FBgn0038135,FBgn0041711,FBgn0045442,FBgn0038130,FBgn0027610,FBgn0262844,FBgn0038146,FBgn0038133,FBgn0004049,FBgn0038149,FBgn0000046,FBgn0038151,FBgn0038142,FBgn0038132,FBgn0086371,FBg…
FBgn0264992	FBgn0259960,FBgn0015400,FBgn0265670,FBgn0032369,FBgn0262786,FBgn0032372,FBgn0032374,FBgn0264815,FBgn0032375,FBgn0032376,FBgn0032378,FBgn0020309,FBgn0259961,FBgn0259962,FBgn0032377,FBgn0032373,FBgn0032371,FBgn0032370
FBgn0264994	FBgn0266363,FBgn0032375,FBgn0032378,FBgn0020309,FBgn0032376,FBgn0266364,FBgn0259961,FBgn0032371,FBgn0032377,FBgn0259962,FBgn0032373,FBgn0032370,FBgn0265349,FBgn0259960,FBgn0032369,FBgn0265670,FBgn0032374,FBgn0000588,FBgn0032372,FBgn0262786,FBgn0264815
FBgn0264995	FBgn0032891,FBgn0053322,FBgn0014859,FBgn0032896,FBgn0032879,FBgn0032895,FBgn0011202,FBgn0028986,FBgn0263996,FBgn0067311,FBgn0051676,FBgn0032889,FBgn0032880,FBgn0032881,FBgn0032878,FBgn0032888,FBgn0032901,FBgn0067312,FBgn0051673,FBgn0032894,FBgn0262743,FBgn0032897,FBgn0032884,FBgn0032882,FBgn0250785,FBgn0032886,FBgn0051675,FBgn0032899,FBgn0032900,FBgn0000251,FBgn0051674,FBgn0032883
FBgn0264997	FBgn0003961,FBgn0041181,FBgn0031926,FBgn0260479,FBgn0031925,FBgn0040299,FBgn0031945,FBgn0014454,FBgn0053296,FBgn0031946,FBgn0267689,FBgn0262880,FBgn0041182,FBgn0031940,FBgn0031939,FBgn0031929,FBgn0020880,FBgn0031947,FBgn0031930,FBgn0267326,FBgn0031935,FBgn0031936,FBgn0031941,FBgn0031937,FBgn0031942,FBgn0264087
FBgn0264998	FBgn0004868,FBgn0040070,FBgn0032125,FBgn0032136,FBgn0053299,FBgn0032124,FBgn0032135,FBgn0051882,FBgn0032127,FBgn0032130,FBgn0014179,FBgn0051709,FBgn0032131,FBgn0032122,FBgn0032120,FBgn0032129,FBgn0032126,FBgn0032132,FBgn0032123,FBgn0028479,FBgn0019809
FBgn0264999	FBgn0032131,FBgn0051709,FBgn0000273,FBgn0025117,FBgn0032132,FBgn0019809,FBgn0015035,FBgn0028479,FBgn0270924,FBgn0011207,FBgn0032144,FBgn0032140,FBgn0028704,FBgn0040070,FBgn0051710,FBgn0265001,FBgn0032139,FBgn0032136,FBgn0053299,Novel000016,FBgn0015393,FBgn0051882,FBgn0011291,FBgn0014179,FBgn0032138,FBgn0032130,FBgn0032143,FBgn0032135
FBgn0265000	FBgn0027779,FBgn0267347,FBgn0051807,FBgn0259735,FBgn0032587,FBgn0053552,FBgn0051815,FBgn0086907,FBgn0032593,FBgn0261278,FBgn0001185,FBgn0051816,FBgn0032588,FBgn0000409,FBgn0032590,FBgn0062978
FBgn0265017	FBgn0031409,FBgn0051682,FBgn0052463,FBgn0027509,FBgn0262126,FBgn0054049,FBgn0031399,FBgn0085203,FBgn0053124,FBgn0053516,FBgn0031406,FBgn0011832,FBgn0031393,FBgn0042186,FBgn0085201,FBgn0031401,FBgn0250841,FBgn0031407,FBgn0264979,FBgn0004507,FBgn0031390,FBgn0031391,FBgn0031392,FBgn0010288,FBgn0031403,FBgn0031389,FBgn0051679,FBgn0040715,FBgn0031397,FBgn0267378,FBgn0031395,FBgn0259717,FBgn0000097,FBg…
FBgn0265039	FBgn0027570,FBgn0037263,FBgn0037262,FBgn0087013,FBgn0263346,FBgn0022981,Novel000140,FBgn0087012,FBgn0037265,FBgn0052945,FBgn0026620,FBgn0010750,FBgn0264907,FBgn0040466,FBgn0037270,FBgn0053927,FBgn0037261
FBgn0265040	FBgn0040466,FBgn0037270,FBgn0264907,FBgn0037261,FBgn0053927,FBgn0026620,FBgn0010750,FBgn0037265,FBgn0087012,Novel000140,FBgn0022981,FBgn0052945,FBgn0087013,FBgn0264897,FBgn0037262,FBgn0027570,FBgn0037263,FBgn0263346
FBgn0265043	FBgn0261932,FBgn0261046,Novel000183,FBgn0000564,FBgn0038511,FBgn0025456,FBgn0264899,FBgn0262004,FBgn0038499,FBgn0053333,FBgn0262005,FBgn0038508,FBgn0262003,FBgn0038504,FBgn0085309,FBgn0262023,FBgn0262024,FBgn0262006,FBgn0262871,FBgn0038509,FBgn0038507,FBgn0085308,FBgn0038510,FBgn0038498,FBgn0038506,FBgn0038505,FBgn0028992,FBgn0038512
FBgn0265044	FBgn0033063,FBgn0263144,FBgn0050431,FBgn0033069,FBgn0000546,FBgn0033067,Novel000089,FBgn0033074,FBgn0040502,FBgn0021847,FBgn0262867,FBgn0033075,FBgn0033072,FBgn0033065,FBgn0050432
FBgn0265049	FBgn0050446,FBgn0262736,FBgn0000473,FBgn0033095,FBgn0050443,FBgn0259483,FBgn0033092,FBgn0010482,FBgn0033079,FBgn0033089,FBgn0266518,FBgn0033085,FBgn0259977,FBgn0033088,FBgn0033093,FBgn0033087,FBgn0026761,FBgn0033100,FBgn0033096,FBgn0033090,FBgn0042085,FBgn0014009,FBgn0053919,FBgn0266525,FBgn0033086,FBgn0013732,FBgn0033081,FBgn0027066,FBgn0033097,FBgn0000054,FBgn0028579,FBgn0029131,FBgn0033101,FBg…
FBgn0265051	FBgn0033117,FBgn0265137,FBgn0085244,FBgn0022224,FBgn0033101,FBgn0265003,FBgn0053558,FBgn0033100,FBgn0042083,FBgn0040674,FBgn0050158,FBgn0085421,FBgn0028988,FBgn0033112,FBgn0033108,FBgn0000473,FBgn0033104,FBgn0033115,FBgn0265935,FBgn0033110,FBgn0014028,FBgn0027066,FBgn0033113,FBgn0028579
FBgn0265059	FBgn0033122,FBgn0027558,FBgn0263655,FBgn0033112,FBgn0053558,FBgn0033141,FBgn0053348,FBgn0033138,FBgn0033134,FBgn0033117,FBgn0066293,FBgn0263656,FBgn0033139,FBgn0050160,FBgn0029507,FBgn0033113,FBgn0033132,FBgn0033137,FBgn0033128,FBgn0033121,FBgn0033130,FBgn0050157,FBgn0029508,FBgn0050159,FBgn0033129,FBgn0050158,FBgn0028988,FBgn0053349,FBgn0016032,FBgn0033136,FBgn0033135,FBgn0033124,FBgn0022960,FBg…
FBgn0265060	FBgn0033124,FBgn0033135,FBgn0033136,FBgn0053349,FBgn0028988,FBgn0050158,FBgn0033129,FBgn0050159,FBgn0016032,FBgn0053914,FBgn0033115,FBgn0033133,FBgn0029506,FBgn0033127,FBgn0066292,FBgn0050156,FBgn0042086,FBgn0022960,FBgn0033140,FBgn0033134,FBgn0033138,FBgn0053348,FBgn0263656,FBgn0033117,FBgn0066293,FBgn0033112,FBgn0263655,FBgn0033122,FBgn0027558,FBgn0033141,FBgn0053558,FBgn0033121,FBgn0033128,FBg…
FBgn0265061	FBgn0022960,FBgn0042086,FBgn0263934,FBgn0033140,FBgn0033133,FBgn0029506,FBgn0033127,FBgn0053914,FBgn0050156,FBgn0066292,FBgn0050159,FBgn0033129,FBgn0053349,FBgn0016032,FBgn0033136,FBgn0033135,FBgn0033124,FBgn0033139,FBgn0029507,FBgn0050160,FBgn0033132,FBgn0033137,FBgn0033128,FBgn0033121,FBgn0033130,FBgn0029508,FBgn0050157,FBgn0027558,FBgn0033122,FBgn0263655,FBgn0053558,FBgn0033141,FBgn0053348,FBg…
FBgn0265062	FBgn0051404,FBgn0265063,FBgn0038692,Novel000184,FBgn0086613,FBgn0051475,FBgn0038695,FBgn0025680,FBgn0262839,FBgn0038693,FBgn0038697,FBgn0038691,FBgn0267975,FBgn0038690,FBgn0038686,FBgn0051245,FBgn0038694,FBgn0000463
FBgn0265064	FBgn0086613,FBgn0038695,FBgn0051244,FBgn0038700,FBgn0262839,FBgn0038693,FBgn0051404,FBgn0265063,FBgn0038692,FBgn0038701,FBgn0038690,FBgn0038704,FBgn0051245,FBgn0038694,FBgn0000463,FBgn0038706,FBgn0038705,FBgn0038697,FBgn0038691,FBgn0051221,FBgn0038702
FBgn0265065	FBgn0038236,FBgn0085302,FBgn0038224,FBgn0086901,FBgn0038237,FBgn0085417,FBgn0038235,FBgn0038225,FBgn0003480,FBgn0038233,FBgn0051320,FBgn0038223,FBgn0038234,FBgn0024321
FBgn0265066	FBgn0038243,FBgn0020299,FBgn0038238,FBgn0085417,FBgn0038239,FBgn0038237,FBgn0038233,FBgn0038241,FBgn0051313,FBgn0038235,FBgn0086901,FBgn0038244,FBgn0038236,FBgn0085302,FBgn0038242,FBgn0038234,FBgn0004629,FBgn0038240,FBgn0264903
FBgn0265067	FBgn0264357,FBgn0038862,FBgn0038846,FBgn0051189,FBgn0013995,FBgn0000083,FBgn0038854,FBgn0038845,FBgn0250820,FBgn0038858,FBgn0038851,FBgn0266674,FBgn0010770,FBgn0015790,FBgn0038849,FBgn0038852,FBgn0038855,FBgn0025865,FBgn0013812,FBgn0038865,FBgn0260004,FBgn0046763,FBgn0011672,FBgn0038866,FBgn0038860,FBgn0038850,FBgn0038857,FBgn0051207,FBgn0038861,FBgn0038847,FBgn0267841,FBgn0028468,FBgn0038853,FBg…
FBgn0265069	FBgn0032299,FBgn0032296,FBgn0032290,FBgn0032298,FBgn0032283,FBgn0040496,FBgn0032292,FBgn0032286,FBgn0032291,FBgn0032271,FBgn0032294,FBgn0015320,FBgn0043825,FBgn0032285,FBgn0085190,FBgn0032281,FBgn0023496,FBgn0032289,FBgn0032284,FBgn0051721,FBgn0032297,FBgn0032287,FBgn0250826,FBgn0267254,FBgn0032295,FBgn0032280,FBgn0032276,FBgn0051869,FBgn0032293,FBgn0032282,FBgn0265264,FBgn0051871,FBgn0024740,FBg…
FBgn0265072	FBgn0040510,FBgn0032467,FBgn0263598,FBgn0032462,FBgn0040509,FBgn0040508,FBgn0032465,FBgn0262160,FBgn0032464,FBgn0040506,FBgn0021796,FBgn0265262,FBgn0028965
FBgn0265073	FBgn0032744,FBgn0000422,FBgn0002022,FBgn0032732,FBgn0000075,FBgn0002021,FBgn0032725,FBgn0032750,FBgn0032748,FBgn0002036,FBgn0032754,FBgn0046302,FBgn0032727,FBgn0032730,FBgn0032728,FBgn0001202,FBgn0086710,FBgn0032726,FBgn0032755,FBgn0032751,FBgn0032746,FBgn0263198,FBgn0032731,FBgn0032752,FBgn0086442,FBgn0028569,FBgn0263982,FBgn0032733,FBgn0032740,FBgn0002023,FBgn0051800,FBgn0032753,FBgn0032723,FBg…
FBgn0265074	FBgn0031219,FBgn0031235,FBgn0031232,FBgn0025683,FBgn0031224,FBgn0031214,FBgn0031233,FBgn0026787,FBgn0031231,FBgn0067779,FBgn0031217,FBgn0031213,FBgn0005278,FBgn0031229,FBgn0051975,FBgn0051976,FBgn0031227,FBgn0031220,FBgn0002931,FBgn0031216,FBgn0016977,FBgn0031228,FBgn0053635,FBgn0259818,FBgn0051974,FBgn0266557,FBgn0051973,FBgn0001142
FBgn0265075	FBgn0259818,FBgn0266557,FBgn0051974,FBgn0051973,FBgn0001142,FBgn0031227,FBgn0002931,FBgn0031220,FBgn0051976,FBgn0016977,FBgn0031228,FBgn0053635,FBgn0031216,FBgn0005278,FBgn0067779,FBgn0031231,FBgn0031217,FBgn0031213,FBgn0051975,FBgn0031229,FBgn0031219,FBgn0031233,FBgn0031214,FBgn0026787,FBgn0031235,FBgn0025683,FBgn0031232,FBgn0031224
FBgn0265076	FBgn0032877,FBgn0086657,FBgn0032878,FBgn0032881,FBgn0032869,FBgn0000251,FBgn0032870,FBgn0051680,FBgn0262743,FBgn0032873,FBgn0032883,FBgn0261787,FBgn0032876,FBgn0032867,FBgn0032884,FBgn0032879,FBgn0014859,FBgn0016054,FBgn0250785,FBgn0032882,FBgn0042133,FBgn0011202,FBgn0051678,FBgn0032886,FBgn0032871,FBgn0261058,FBgn0032880,FBgn0032868
FBgn0265077	FBgn0032886,FBgn0051678,FBgn0032871,FBgn0261058,FBgn0032880,FBgn0032868,FBgn0250785,FBgn0016054,FBgn0042133,FBgn0032882,FBgn0011202,FBgn0032867,FBgn0032879,FBgn0032884,FBgn0014859,FBgn0032876,FBgn0051680,FBgn0262743,FBgn0032873,FBgn0032883,FBgn0261787,FBgn0000251,FBgn0032870,FBgn0032869,FBgn0032877,FBgn0086657,FBgn0032878,FBgn0032881
FBgn0265078	FBgn0086447,FBgn0086445,FBgn0265263,FBgn0051797,Novel000039,FBgn0000422,FBgn0015380,FBgn0032763,FBgn0086444,FBgn0086443,FBgn0032768,FBgn0086446,FBgn0267726,FBgn0002031,FBgn0010300,FBgn0032769,FBgn0010309,FBgn0010097
FBgn0265079	FBgn0051797,FBgn0032770,FBgn0265263,FBgn0024245,FBgn0032771,FBgn0032763,FBgn0010300,FBgn0032769,FBgn0010309,FBgn0010097,FBgn0015380,FBgn0032768,FBgn0267726
FBgn0265080	FBgn0265263,FBgn0051797,FBgn0267726,FBgn0032768,FBgn0015380,FBgn0032769,FBgn0010097,FBgn0010309,FBgn0024245,FBgn0010300,FBgn0032763
FBgn0265081	FBgn0051407,FBgn0037792,FBgn0037778,FBgn0037786,Novel000146,FBgn0037783,FBgn0037788,FBgn0027524,FBgn0086359,FBgn0037780,Novel000147,FBgn0037779,FBgn0045473,FBgn0266721,FBgn0053783,FBgn0037781,FBgn0053630,FBgn0051410,FBgn0267336,FBgn0028734,FBgn0053784,FBgn0051477,FBgn0001321,Novel000179,FBgn0037772,FBgn0037782,FBgn0053208,FBgn0037773,FBgn0004889,FBgn0261817,FBgn0037770,FBgn0085332,FBgn0037777,FBg…
FBgn0265085	FBgn0028850,FBgn0011239,FBgn0086691,FBgn0261268,FBgn0259965,FBgn0028878,FBgn0028862,FBgn0259982,FBgn0028852,FBgn0001978,FBgn0028888,FBgn0028516,FBgn0045842,FBgn0262875,FBgn0028853,FBgn0027559
FBgn0265086	FBgn0262160,FBgn0051849,FBgn0264546,FBgn0032470,FBgn0021796,FBgn0032471,FBgn0028965,FBgn0032475,FBgn0032478,FBgn0032474,FBgn0032472,FBgn0024291,FBgn0262352,FBgn0040972,FBgn0032479,FBgn0032465,FBgn0028410,FBgn0032477,FBgn0265262,FBgn0032476,FBgn0032467,FBgn0032473
FBgn0265087	FBgn0032476,FBgn0032480,FBgn0028410,FBgn0032477,FBgn0032483,FBgn0032473,FBgn0032467,FBgn0028965,FBgn0032470,FBgn0032482,FBgn0032471,FBgn0264546,FBgn0051849,FBgn0262160,FBgn0032479,FBgn0032481,FBgn0032472,FBgn0262352,FBgn0040972,FBgn0024291,FBgn0032484,FBgn0032485,FBgn0032475,FBgn0032478,FBgn0032474
FBgn0265088	FBgn0032482,FBgn0051849,FBgn0262160,FBgn0032489,FBgn0032481,FBgn0032472,FBgn0032495,FBgn0032485,FBgn0032478,FBgn0032475,FBgn0032488,FBgn0032483,FBgn0032492,FBgn0032473,FBgn0032491,FBgn0032486,FBgn0032487,FBgn0032470,FBgn0032471,FBgn0264546,FBgn0032479,FBgn0027586,FBgn0024291,FBgn0040972,FBgn0262352,FBgn0032484,FBgn0032474,FBgn0032476,FBgn0032480,FBgn0028410,FBgn0032477,FBgn0032494,FBgn0032490,FBg…
FBgn0265095	FBgn0033140,FBgn0263934,FBgn0033139,FBgn0024293,FBgn0053140,FBgn0050385,FBgn0044011,FBgn0015039,FBgn0033137,FBgn0015038,FBgn0033153,FBgn0016032,FBgn0026602,FBgn0050384,FBgn0033145,FBgn0033141,FBgn0027558,FBgn0003090,FBgn0026389,FBgn0024294,FBgn0002930,FBgn0033136,FBgn0033135,FBgn0033138,FBgn0033149
FBgn0265097	FBgn0033164,FBgn0033166,FBgn0025885,FBgn0033170,FBgn0033177,FBgn0050502,FBgn0033184,FBgn0033187,FBgn0259745,FBgn0262948,FBgn0041243,FBgn0033169,FBgn0050503,FBgn0025185,FBgn0033183,FBgn0000352,FBgn0033174,FBgn0010548,FBgn0033179,FBgn0033159,FBgn0040513,FBgn0022772,FBgn0033160,FBgn0003460,FBgn0033162,FBgn0033165,FBgn0033186,FBgn0033167,FBgn0262583,FBgn0033178,FBgn0015929,FBgn0261397,FBgn0263240,FBg…
FBgn0265098	FBgn0050503,FBgn0262948,FBgn0041243,FBgn0033169,FBgn0000352,FBgn0033174,FBgn0025185,FBgn0033183,FBgn0025885,FBgn0033170,FBgn0033164,FBgn0033166,FBgn0033177,FBgn0033184,FBgn0050502,FBgn0259745,FBgn0033187,FBgn0003460,FBgn0033162,FBgn0033165,FBgn0033186,FBgn0263240,FBgn0033185,FBgn0033168,FBgn0033188,FBgn0262583,FBgn0033167,FBgn0033178,FBgn0015929,FBgn0261397,FBgn0033159,FBgn0022772,FBgn0040513,FBg…
FBgn0265099	FBgn0033160,FBgn0033179,FBgn0010548,FBgn0040513,FBgn0022772,FBgn0033159,FBgn0015929,FBgn0261397,FBgn0033178,FBgn0033167,FBgn0262583,FBgn0033188,FBgn0033168,FBgn0033185,FBgn0263240,FBgn0033186,FBgn0033162,FBgn0033165,FBgn0003460,FBgn0033187,FBgn0259745,FBgn0050502,FBgn0033184,FBgn0033177,FBgn0033166,FBgn0033164,FBgn0033170,FBgn0025885,FBgn0033183,FBgn0025185,FBgn0033174,FBgn0000352,FBgn0033169,FBg…
FBgn0265103	FBgn0266186,FBgn0054033,FBgn0033454,FBgn0027580,FBgn0033457,FBgn0033439,FBgn0260474,FBgn0023143,FBgn0033451,FBgn0010316,FBgn0050001,FBgn0033446,FBgn0033453,FBgn0033449,FBgn0050010,FBgn0033450,FBgn0027589,FBgn0040093,FBgn0262594,FBgn0033442,FBgn0033443,FBgn0011241,FBgn0033438,FBgn0033448,FBgn0040092,FBgn0033440,FBgn0259678,FBgn0023180,FBgn0005614,FBgn0023175,FBgn0033447
FBgn0265104	FBgn0033815,FBgn0053470,FBgn0265272,Novel000092,FBgn0259219,FBgn0033830,FBgn0019928,FBgn0033821,FBgn0263774,FBgn0033826,FBgn0050065,FBgn0259221,FBgn0260475,FBgn0033813,FBgn0013765,FBgn0041579,FBgn0033816,FBgn0033835,FBgn0033827,FBgn0033834,FBgn0033818,FBgn0033819,FBgn0033814,FBgn0002789,FBgn0033836,Novel000093,FBgn0033828,FBgn0033817,FBgn0033812,FBgn0052843,FBgn0033820
FBgn0265105	FBgn0033446,FBgn0050010,FBgn0266186,FBgn0033457,FBgn0033451,FBgn0050001,FBgn0005614,FBgn0023175,FBgn0033447,FBgn0040093,FBgn0027589,FBgn0262594,FBgn0033443,FBgn0040092,FBgn0033438,FBgn0033440,FBgn0033453,FBgn0033449,FBgn0033450,FBgn0033459,FBgn0054033,FBgn0033454,FBgn0033458,FBgn0027580,FBgn0023143,FBgn0260474,FBgn0033439,FBgn0010316,FBgn0023180,FBgn0259678,FBgn0033442,FBgn0011241,FBgn0033460,FBg…
FBgn0265106	FBgn0023175,FBgn0033447,FBgn0033463,FBgn0005614,FBgn0033440,FBgn0040092,FBgn0033461,FBgn0033443,FBgn0050008,FBgn0027589,FBgn0040093,FBgn0262594,FBgn0050010,FBgn0033446,FBgn0033451,FBgn0050001,FBgn0033457,FBgn0266186,FBgn0023180,FBgn0259678,FBgn0033448,FBgn0033460,FBgn0011241,FBgn0033442,FBgn0033450,FBgn0033449,FBgn0033453,FBgn0010316,FBgn0023143,FBgn0260474,FBgn0033439,FBgn0027580,FBgn0054033,FBg…
FBgn0265107	FBgn0263077,FBgn0033191,FBgn0033194,FBgn0033196,FBgn0003460,FBgn0033186,FBgn0033178,FBgn0015929,FBgn0263046,FBgn0261397,FBgn0263240,FBgn0033195,FBgn0033188,FBgn0033185,FBgn0010548,FBgn0033179,FBgn0261385,FBgn0040513,FBgn0022772,FBgn0004133,FBgn0033169,FBgn0050503,FBgn0033190,FBgn0025185,FBgn0033183,FBgn0033174,FBgn0264294,FBgn0050499,FBgn0025885,FBgn0033170,FBgn0033192,FBgn0004132,FBgn0033177,FBg…
FBgn0265143	FBgn0261807,FBgn0034470,FBgn0034467,FBgn0003435,FBgn0085227,FBgn0028372,FBgn0034472,FBgn0034462,FBgn0034459,FBgn0040730,FBgn0015949,FBgn0034464,FBgn0262571,FBgn0262966,FBgn0046880,FBgn0040729,FBgn0262170,FBgn0034460,FBgn0034463,FBgn0034471,FBgn0043533,FBgn0034468,FBgn0046879,FBgn0034461
FBgn0265144	FBgn0040730,FBgn0034472,FBgn0034459,FBgn0034462,FBgn0034464,FBgn0015949,FBgn0003435,FBgn0261807,FBgn0034467,FBgn0034470,FBgn0028372,FBgn0085227,FBgn0034463,FBgn0034471,FBgn0034468,FBgn0034461,FBgn0046879,FBgn0043533,FBgn0046880,FBgn0262966,FBgn0034460,FBgn0262170,FBgn0040729
FBgn0265145	FBgn0034471,FBgn0034463,FBgn0043533,FBgn0034461,FBgn0046879,FBgn0034468,FBgn0262966,FBgn0046880,FBgn0034460,FBgn0262170,FBgn0040729,FBgn0034462,FBgn0034459,FBgn0034472,FBgn0040730,FBgn0015949,FBgn0034464,FBgn0034470,FBgn0034467,FBgn0261807,FBgn0003435,FBgn0085227,FBgn0028372
FBgn0265147	FBgn0263038,FBgn0052971,FBgn0016930,FBgn0028906,FBgn0261563,FBgn0261529,FBgn0263037,FBgn0028916,FBgn0028531
FBgn0265148	FBgn0084001,FBgn0051601,FBgn0051600,FBgn0085202,FBgn0028979,FBgn0032967,FBgn0032969,FBgn0032965,FBgn0051693,FBgn0032968,FBgn0032966
FBgn0265149	FBgn0086856,FBgn0031232,FBgn0031233,FBgn0031244,FBgn0031245,FBgn0031231,FBgn0004611,FBgn0086855,FBgn0031229,FBgn0264086,FBgn0031227,FBgn0017457,FBgn0053635,FBgn0259818,FBgn0266557,FBgn0031238,FBgn0025686,FBgn0053127,FBgn0020622,FBgn0031235,FBgn0031249,FBgn0003444,FBgn0031239,FBgn0051921,FBgn0086912,FBgn0016977,FBgn0031228,FBgn0024352,FBgn0031240,FBgn0022246,FBgn0031248,FBgn0031247
FBgn0265150	FBgn0017457,FBgn0016977,FBgn0031250,FBgn0086912,FBgn0031248,FBgn0022246,FBgn0053127,FBgn0031247,FBgn0025686,FBgn0266557,FBgn0031238,FBgn0031240,FBgn0024352,FBgn0031249,FBgn0031235,FBgn0031232,FBgn0031233,FBgn0031245,FBgn0031244,FBgn0086856,FBgn0020622,FBgn0051921,FBgn0264086,FBgn0031231,FBgn0004611,FBgn0031239,FBgn0003444,FBgn0086855
FBgn0265151	FBgn0259818,FBgn0266557,FBgn0031238,FBgn0025686,FBgn0017457,FBgn0053635,FBgn0051976,FBgn0031227,FBgn0031229,FBgn0031231,FBgn0004611,FBgn0086855,FBgn0025683,FBgn0031232,FBgn0031224,FBgn0031245,FBgn0031233,FBgn0031244,FBgn0086856,FBgn0022246,FBgn0031248,FBgn0001142,FBgn0031247,FBgn0024352,FBgn0051974,FBgn0031240,FBgn0016977,FBgn0031228,FBgn0086912,FBgn0031220,FBgn0051975,FBgn0031239,FBgn0003444,FBg…
FBgn0265152	FBgn0086912,FBgn0016977,FBgn0031228,FBgn0024352,FBgn0031240,FBgn0051974,FBgn0001142,FBgn0031247,FBgn0022246,FBgn0031248,FBgn0020622,FBgn0031235,FBgn0031249,FBgn0003444,FBgn0031239,FBgn0051975,FBgn0031227,FBgn0051976,FBgn0053635,FBgn0017457,FBgn0259818,FBgn0266557,FBgn0031238,FBgn0025686,FBgn0053127,FBgn0086856,FBgn0031245,FBgn0031233,FBgn0031244,FBgn0025683,FBgn0031232,FBgn0031224,FBgn0086855,FBg…
FBgn0265153	FBgn0051976,FBgn0031227,FBgn0017457,FBgn0053635,FBgn0259818,FBgn0025686,FBgn0266557,FBgn0031238,FBgn0053127,FBgn0086856,FBgn0025683,FBgn0031232,FBgn0031224,FBgn0031244,FBgn0031233,FBgn0031245,FBgn0031231,FBgn0086855,FBgn0004611,FBgn0031229,FBgn0086912,FBgn0016977,FBgn0031228,FBgn0024352,FBgn0031240,FBgn0051974,FBgn0022246,FBgn0031248,FBgn0031247,FBgn0001142,FBgn0020622,FBgn0031235,FBgn0031249,FBg…
FBgn0265156	FBgn0039040,FBgn0051281,FBgn0039044,FBgn0017590,FBgn0039034,FBgn0039030,FBgn0039049,FBgn0039053,FBgn0039048,FBgn0039039,FBgn0039051,FBgn0027526,FBgn0053193,FBgn0039050,FBgn0263390,FBgn0039045,FBgn0039038,FBgn0085404,FBgn0041225,FBgn0039033,FBgn0039042,FBgn0039031,FBgn0039052,FBgn0039041,FBgn0039054,FBgn0039043
FBgn0265157	FBgn0039051,FBgn0027526,FBgn0053193,FBgn0039050,FBgn0263390,FBgn0039045,FBgn0039038,FBgn0085404,FBgn0051365,FBgn0041225,FBgn0039033,FBgn0039042,FBgn0039031,FBgn0004644,FBgn0039052,FBgn0039041,FBgn0039054,FBgn0039043,FBgn0039040,FBgn0039044,FBgn0051281,FBgn0017590,FBgn0051457,FBgn0039034,FBgn0039056,FBgn0039049,FBgn0039053,FBgn0039055,FBgn0039039,FBgn0039048
FBgn0265160	FBgn0085383,FBgn0039582,FBgn0039580,FBgn0085465,FBgn0039577,FBgn0002865,FBgn0261618,FBgn0039576,FBgn0262588,FBgn0262587,FBgn0039581,FBgn0004171,FBgn0085466,Novel000160
FBgn0265161	FBgn0037827,FBgn0037829,FBgn0037826,FBgn0051278,FBgn0037831,FBgn0037832,FBgn0266451,FBgn0261356,FBgn0051467,FBgn0262717,FBgn0001235,FBgn0261380,FBgn0037819,FBgn0266448,FBgn0020385,FBgn0037828,FBgn0037818,FBgn0004841,FBgn0010421,FBgn0051390,FBgn0051391,FBgn0260944,FBgn0051272,FBgn0266446,FBgn0037822,FBgn0051373,FBgn0037824
FBgn0265162	FBgn0263621,FBgn0038082,FBgn0038084,FBgn0038074,FBgn0038070,FBgn0051347,FBgn0001296,FBgn0038068,FBgn0038072,FBgn0260444,FBgn0038079,FBgn0038069,FBgn0051345,FBgn0038065,FBgn0038076,FBgn0038078,FBgn0038071,FBgn0026207,FBgn0005355,FBgn0002719,FBgn0038073,FBgn0038083,FBgn0042207,FBgn0038080,FBgn0016693,FBgn0002905,FBgn0038067,FBgn0011745
FBgn0265163	FBgn0038076,FBgn0038078,FBgn0026207,FBgn0005355,FBgn0038079,FBgn0051345,FBgn0002905,FBgn0011745,FBgn0002719,FBgn0038073,FBgn0038088,FBgn0038083,FBgn0038080,FBgn0016693,FBgn0038084,FBgn0038074,FBgn0263621,FBgn0038082,FBgn0051347,FBgn0001296,FBgn0038087
FBgn0265164	FBgn0002905,FBgn0011745,FBgn0016693,FBgn0038080,FBgn0038083,FBgn0038073,FBgn0038088,FBgn0002719,FBgn0005355,FBgn0026207,FBgn0038078,FBgn0038076,FBgn0051345,FBgn0038079,FBgn0038087,FBgn0001296,FBgn0051347,FBgn0038074,FBgn0038084,FBgn0038082,FBgn0263621
FBgn0265165	FBgn0038092,FBgn0038088,FBgn0038087,FBgn0040493,FBgn0051345,FBgn0038084,FBgn0038090,FBgn0038089
FBgn0265166	FBgn0038089,FBgn0038090,FBgn0038099,FBgn0038087,FBgn0038100,FBgn0087021,FBgn0038097,FBgn0038098,FBgn0051345,FBgn0040493,FBgn0041710,FBgn0038088,FBgn0051342,FBgn0038102,FBgn0038092,FBgn0038095
FBgn0265167	FBgn0038111,FBgn0040493,FBgn0265083,FBgn0038098,FBgn0038106,FBgn0038110,FBgn0041710,FBgn0038105,FBgn0038092,FBgn0038102,FBgn0038088,FBgn0051342,FBgn0002354,FBgn0038095,FBgn0020496,FBgn0038109,FBgn0038090,FBgn0038089,FBgn0038100,FBgn0038108,FBgn0038099,FBgn0038107,FBgn0038087,FBgn0038097,FBgn0087021
FBgn0265168	FBgn0051533,FBgn0038210,FBgn0010340,FBgn0038203,FBgn0038199,FBgn0020510,FBgn0038207,FBgn0038195,FBgn0038209,FBgn0038201,FBgn0260226,FBgn0262955,FBgn0038194,FBgn0038208,FBgn0038205,FBgn0264493,FBgn0038200,FBgn0038202,FBgn0038197,FBgn0038204,FBgn0038206,FBgn0051327,FBgn0038196,FBgn0038198,FBgn0011582
FBgn0265169	FBgn0038481,FBgn0038491,FBgn0266053,FBgn0051266,FBgn0038487,FBgn0038492,FBgn0038473,FBgn0266454,FBgn0038482,FBgn0038469,FBgn0038474,FBgn0051265,FBgn0038470,FBgn0038490,FBgn0038484,FBgn0038478,FBgn0266465,FBgn0038488,FBgn0261847,FBgn0051269,FBgn0038475,FBgn0085307,FBgn0038472,FBgn0038486,FBgn0014141,FBgn0051268,FBgn0038468,FBgn0038471,FBgn0051267,FBgn0038485,FBgn0264291,FBgn0038479,FBgn0038476,FBg…
FBgn0265176	FBgn0013750,FBgn0259737,FBgn0001187,FBgn0034010,FBgn0034001,FBgn0033998,FBgn0034009,FBgn0033999,FBgn0034000,FBgn0003328,FBgn0259878,FBgn0050081,FBgn0034012,FBgn0034008,FBgn0033995,FBgn0033996,FBgn0004698,FBgn0034013,FBgn0034007,FBgn0034011,FBgn0011660,FBgn0034002,FBgn0000996,FBgn0034005,FBgn0026370,FBgn0265194
FBgn0265196	FBgn0038512,FBgn0028992,FBgn0038510,FBgn0038498,FBgn0038506,FBgn0038505,FBgn0085308,FBgn0051419,FBgn0038509,FBgn0038507,FBgn0262024,FBgn0262006,FBgn0262023,FBgn0262871,FBgn0085309,FBgn0262005,FBgn0038508,FBgn0038504,FBgn0262003,FBgn0053333,FBgn0262004,FBgn0038499,FBgn0051418,FBgn0025456,FBgn0264899,Novel000183,FBgn0038511,FBgn0000564,FBgn0261932
FBgn0265198	FBgn0051418,FBgn0038498,FBgn0265197,FBgn0051262,FBgn0051419,FBgn0265199,FBgn0038494,FBgn0038492
FBgn0265200	FBgn0083963,FBgn0037514,FBgn0262899,FBgn0042103,FBgn0051473,FBgn0037512,FBgn0037518,FBgn0037521,FBgn0037517,FBgn0042105,FBgn0037519,FBgn0042104,FBgn0037520,FBgn0042101,FBgn0037516,FBgn0037513,FBgn0037515,FBgn0042102,FBgn0051472,FBgn0051146,FBgn0085413
FBgn0265202	FBgn0039751,FBgn0000279,FBgn0039760,FBgn0266443,FBgn0002773,FBgn0051028,FBgn0086355,FBgn0000277,FBgn0266411,FBgn0039757,FBgn0039754,FBgn0051029,FBgn0039759,FBgn0039747,FBgn0263402,FBgn0000276,FBgn0000094,FBgn0260860,FBgn0039758,FBgn0085328,FBgn0000278,FBgn0266442,FBgn0039748,FBgn0039761,FBgn0051025,FBgn0039752,FBgn0051030,FBgn0039749,FBgn0010113,FBgn0039756,FBgn0039755
FBgn0265203	FBgn0039864,FBgn0039882,FBgn0039872,FBgn0022349,FBgn0039870,FBgn0017448,FBgn0027620,FBgn0039877,FBgn0039862,FBgn0039875,FBgn0261583,FBgn0039873,FBgn0261479,FBgn0039863,FBgn0039883,FBgn0003065,FBgn0005632,FBgn0000557,FBgn0270927,FBgn0003870,FBgn0039867,FBgn0039868,FBgn0250755,Novel000164,FBgn0039876,FBgn0000150,FBgn0039869,FBgn0039881,FBgn0011224,FBgn0039879,FBgn0266268
FBgn0265204	FBgn0039622,FBgn0039629,FBgn0005596,FBgn0039633,FBgn0039636,FBgn0039625,FBgn0039621,FBgn0041780,FBgn0039617,FBgn0039635,FBgn0039627,FBgn0039634,FBgn0003093,FBgn0039632,FBgn0039626,FBgn0027873,Novel000161,FBgn0039628,FBgn0039616,FBgn0265998,FBgn0039620,FBgn0039631,FBgn0039623,FBgn0039630
FBgn0265205	FBgn0260004,FBgn0038873,FBgn0038880,FBgn0038868,Novel000155,FBgn0038865,FBgn0038862,FBgn0264357,FBgn0043012,FBgn0038861,FBgn0038869,FBgn0038866,FBgn0038860,Novel000154,FBgn0038879,FBgn0038871,FBgn0038877,Novel000153,FBgn0038878,FBgn0038874,FBgn0267841,FBgn0000527,FBgn0016700,FBgn0038870,FBgn0250820,FBgn0038858,FBgn0038872,FBgn0038859,FBgn0038876,FBgn0038881
FBgn0265252	FBgn0030304,FBgn0030319,FBgn0002723,FBgn0030309,Novel000203,FBgn0266421,FBgn0000618,FBgn0027259,FBgn0030316,FBgn0030311,FBgn0030306,FBgn0030318,FBgn0003277,FBgn0052666,FBgn0030310,Novel000204,FBgn0030320,FBgn0030307,FBgn0030313,FBgn0004370,FBgn0030314,FBgn0030321,FBgn0002948,FBgn0030305,FBgn0262685,FBgn0030317
FBgn0265254	Novel000026,Novel000025,Novel000027,FBgn0039958
FBgn0265255	FBgn0032965,FBgn0032964,FBgn0032961,FBgn0051619,FBgn0051612,FBgn0003866,FBgn0086779
FBgn0265270	FBgn0032632,FBgn0032631,FBgn0032634,FBgn0032629,FBgn0032636,FBgn0032638,FBgn0051803,FBgn0032633,FBgn0051804,FBgn0032635,FBgn0020503,FBgn0085199,FBgn0053928,FBgn0267255,FBgn0260632,FBgn0011274,FBgn0032637
FBgn0265299	FBgn0033236,FBgn0040778,FBgn0033252,FBgn0050377,FBgn0033250,FBgn0026361,FBgn0021814,FBgn0033249,FBgn0027054,FBgn0025469,FBgn0033235,FBgn0025360,FBgn0028562,FBgn0013307,FBgn0050379,FBgn0033243,FBgn0026393,FBgn0026722,FBgn0033241,FBgn0027548,FBgn0033240,FBgn0033232,FBgn0050381,FBgn0033246,FBgn0028561,FBgn0033238,FBgn0023171,FBgn0028563,FBgn0013308,FBgn0033257,FBgn0027788,FBgn0050380,FBgn0033248,FBg…
FBgn0265300	FBgn0004921,FBgn0033337,FBgn0085248,FBgn0033356,FBgn0033358,FBgn0033348,FBgn0002552,FBgn0050349,FBgn0003074,FBgn0265011,FBgn0011300,FBgn0027607,FBgn0033363,FBgn0011286,FBgn0033340,FBgn0024189,FBgn0033349,FBgn0033367,FBgn0033362,FBgn0033364,FBgn0033350,FBgn0033355,FBgn0033342,FBgn0033357,FBgn0033351,FBgn0021825,FBgn0033353,FBgn0033366,FBgn0033359,FBgn0053199,FBgn0033365,FBgn0033344,FBgn0033354,FBg…
FBgn0265301	FBgn0033366,FBgn0033359,FBgn0033365,FBgn0053199,FBgn0033353,FBgn0033357,FBgn0033351,FBgn0021825,FBgn0033342,FBgn0033339,FBgn0033347,FBgn0027513,FBgn0033341,FBgn0033352,FBgn0033344,FBgn0033354,FBgn0011300,FBgn0265011,FBgn0003074,FBgn0027607,FBgn0011286,FBgn0033363,FBgn0002552,FBgn0050349,FBgn0085248,FBgn0033356,FBgn0033348,FBgn0033358,FBgn0004921,FBgn0033337,FBgn0033355,FBgn0033364,FBgn0033350,FBg…
FBgn0265303	FBgn0033274,FBgn0033273,FBgn0033272,FBgn0021995,FBgn0263593,FBgn0265632,FBgn0033271,FBgn0261588,FBgn0050373,Novel000053,FBgn0033277,FBgn0033275,FBgn0011659,FBgn0050376,FBgn0010109,FBgn0050375,FBgn0013726,FBgn0050371,FBgn0010504,FBgn0053087,FBgn0050369,FBgn0085246,FBgn0033278,FBgn0033279,FBgn0033280
FBgn0265304	FBgn0263120,FBgn0003892,FBgn0033324,FBgn0027585,FBgn0043575,FBgn0261267,FBgn0050357,FBgn0050354,FBgn0033322,FBgn0033326,FBgn0024189,FBgn0033323,FBgn0050355,FBgn0033327,FBgn0033320,FBgn0086784,FBgn0033321,FBgn0043576,FBgn0005695,FBgn0040777,FBgn0050350,FBgn0050356,FBgn0001285,FBgn0033330
FBgn0265305	FBgn0043575,FBgn0050357,FBgn0261267,FBgn0050354,FBgn0033322,FBgn0033326,FBgn0263120,FBgn0033324,FBgn0027585,FBgn0050355,FBgn0033327,FBgn0024189,FBgn0033323,FBgn0011286,FBgn0086784,FBgn0033320,FBgn0050350,FBgn0001285,FBgn0050356,FBgn0033330,FBgn0033321,FBgn0005695,FBgn0043576,FBgn0040777
FBgn0265306	FBgn0033309,FBgn0033308,FBgn0033313,FBgn0002569,FBgn0002571,FBgn0014469,FBgn0259226,FBgn0033307,FBgn0033316,FBgn0050361,FBgn0033301,FBgn0033317,FBgn0267792,FBgn0033302,FBgn0033297,FBgn0050360,FBgn0033294,FBgn0033304,FBgn0033312,FBgn0002570,FBgn0022027,FBgn0262812,FBgn0033315,FBgn0033292,FBgn0033296,FBgn0015034,FBgn0050359
FBgn0265307	FBgn0050363,FBgn0265632,FBgn0050362,FBgn0261588,FBgn0033275,FBgn0033285,FBgn0050366,FBgn0033277,FBgn0050364,FBgn0010109,FBgn0050376,FBgn0050375,FBgn0013726,FBgn0050371,FBgn0250827,FBgn0050369,FBgn0053087,FBgn0085246,FBgn0033287,FBgn0033286,FBgn0033278,FBgn0033279,FBgn0033280,FBgn0050365,FBgn0033283
FBgn0265308	FBgn0033312,FBgn0262812,FBgn0022027,FBgn0001285,FBgn0043576,FBgn0033321,FBgn0050354,FBgn0033308,FBgn0033326,FBgn0033322,FBgn0033313,FBgn0263120,FBgn0033324,FBgn0033327,FBgn0033320,FBgn0086784,FBgn0033304,FBgn0033315,FBgn0050356,FBgn0005695,FBgn0040777,FBgn0261267,FBgn0050357,FBgn0043575,FBgn0033309,FBgn0003892,FBgn0027585,FBgn0259226,FBgn0033316,FBgn0033307,FBgn0050355,FBgn0267792,FBgn0033317,FBg…
FBgn0265309	FBgn0035004,FBgn0005636,FBgn0259210,FBgn0034998,FBgn0002787,FBgn0034994,FBgn0035001,FBgn0034999,FBgn0266438,FBgn0266047,FBgn0259729,FBgn0035003,FBgn0266439,FBgn0010414,FBgn0034997,FBgn0035000,FBgn0003888,FBgn0050418,FBgn0034996,FBgn0000037,FBgn0004101,FBgn0005638
FBgn0265310	FBgn0033376,FBgn0050342,FBgn0010220,FBgn0083977,FBgn0266486,FBgn0033371,FBgn0259728,FBgn0033374,FBgn0033369,FBgn0033395,FBgn0033377,FBgn0033382,FBgn0050343,FBgn0015477,FBgn0015561,FBgn0028955,FBgn0033388,FBgn0033389,FBgn0027561,FBgn0050345,FBgn0033380,FBgn0265313,FBgn0025709,FBgn0015838,FBgn0015037,FBgn0002567,FBgn0003612,FBgn0033375,FBgn0260972,FBgn0033392,FBgn0033373,FBgn0033372,FBgn0086656,FBg…
FBgn0265311	FBgn0033380,FBgn0050345,FBgn0027561,FBgn0033389,FBgn0015561,FBgn0028955,FBgn0033388,FBgn0050343,FBgn0015477,FBgn0033377,FBgn0033382,FBgn0033395,FBgn0033374,FBgn0259728,FBgn0033371,FBgn0266486,FBgn0010220,FBgn0083977,FBgn0033376,FBgn0050342,FBgn0033379,FBgn0262515,FBgn0010114,FBgn0050344,FBgn0033391,FBgn0033387,Novel000054,FBgn0033381,FBgn0033397,FBgn0020621,Novel000056,Novel000055,Novel000057,FBg…
FBgn0265312	FBgn0261016,FBgn0033438,FBgn0259246,FBgn0050340,FBgn0050338,FBgn0010342,FBgn0033423,FBgn0033422,FBgn0033421,FBgn0050339,FBgn0033426,FBgn0033427,FBgn0033434,FBgn0050005,FBgn0050000,FBgn0033431,Novel000058,FBgn0260474,FBgn0033428,FBgn0023143,FBgn0033429,FBgn0025286,FBgn0033437,FBgn0085436
FBgn0265314	FBgn0039498,Novel000159,FBgn0042111,FBgn0010441,FBgn0039500,FBgn0039503,FBgn0051068,FBgn0039510,FBgn0261996,FBgn0051064,FBgn0046247,FBgn0039509,FBgn0011289,FBgn0016061,FBgn0260487,FBgn0039511,FBgn0010328,FBgn0039505,FBgn0261995,FBgn0002441,FBgn0040609,FBgn0039507,FBgn0039501,FBgn0039504,FBgn0039508,FBgn0005696,FBgn0015737
FBgn0265315	FBgn0046887,FBgn0040080,FBgn0039518,FBgn0039531,FBgn0039521,FBgn0039528,FBgn0039519,FBgn0039525,FBgn0039527,FBgn0039530,FBgn0262613,FBgn0004387,FBgn0046886,FBgn0039532,FBgn0027492,FBgn0263401,FBgn0039520,FBgn0039522,FBgn0039523,FBgn0046885,FBgn0039529,FBgn0265317
FBgn0265316	FBgn0016061,FBgn0039521,FBgn0039519,FBgn0039528,FBgn0040080,FBgn0039518,FBgn0046887,FBgn0039531,FBgn0039529,FBgn0265317,FBgn0046885,FBgn0039522,FBgn0039523,FBgn0039520,FBgn0039532,FBgn0046886,FBgn0263401,FBgn0027492,FBgn0004387,FBgn0262613,FBgn0039530,FBgn0039527,FBgn0039525
FBgn0265318	FBgn0037590,FBgn0037594,FBgn0000447,FBgn0263231,FBgn0024326,FBgn0051450,FBgn0037591,FBgn0266801,FBgn0051460,FBgn0051259,FBgn0037602,FBgn0026399,FBgn0259992,FBgn0051453,FBgn0040531,FBgn0051454,FBgn0086679,FBgn0261929,FBgn0037592,FBgn0037603,FBgn0037601,FBgn0266916
FBgn0265338	FBgn0010316,FBgn0033440,FBgn0023143,FBgn0033438,FBgn0033439,FBgn0260474,FBgn0033443,FBgn0033442,FBgn0027589,FBgn0262594,FBgn0005614,FBgn0033437,FBgn0259678
FBgn0265340	FBgn0050011,FBgn0033486,FBgn0085249,FBgn0013435,FBgn0033480,FBgn0263260,FBgn0033468,FBgn0033485,FBgn0033476,FBgn0028560,FBgn0010385,FBgn0033484,FBgn0027619,FBgn0033467,FBgn0033469,FBgn0033474,FBgn0033466,FBgn0265342,FBgn0011656,FBgn0033473,FBgn0010531,FBgn0033483,FBgn0040773,FBgn0004907,FBgn0033481,FBgn0262169,FBgn0001291,FBgn0033479,FBgn0033482,FBgn0033475,FBgn0000606,FBgn0261014,FBgn0003071,FBg…
FBgn0265341	FBgn0028560,FBgn0263260,FBgn0013435,FBgn0033480,FBgn0033468,FBgn0033485,FBgn0033490,FBgn0033476,FBgn0050011,FBgn0033486,FBgn0085249,FBgn0033483,FBgn0033491,FBgn0033473,FBgn0010531,FBgn0033474,FBgn0033466,FBgn0011656,FBgn0265342,FBgn0010385,FBgn0033484,FBgn0027619,FBgn0033469,FBgn0033467,FBgn0033475,FBgn0001291,FBgn0033479,FBgn0033482,FBgn0033481,FBgn0026388,FBgn0262169,FBgn0040773,FBgn0004907,FBg…
FBgn0265344	FBgn0033476,FBgn0033490,FBgn0033468,FBgn0033485,FBgn0263260,FBgn0013435,FBgn0033480,FBgn0085249,FBgn0033486,FBgn0050011,FBgn0028560,FBgn0011656,FBgn0265342,FBgn0033474,FBgn0033466,FBgn0033469,FBgn0033467,FBgn0027619,FBgn0033494,FBgn0010385,FBgn0033484,FBgn0033483,FBgn0010531,FBgn0033491,FBgn0033473,FBgn0262169,FBgn0026388,FBgn0033481,FBgn0004907,FBgn0040773,FBgn0033475,FBgn0033482,FBgn0033479,FBg…
FBgn0265345	Novel000059,FBgn0033550,FBgn0024956,FBgn0033542,FBgn0033548,FBgn0033543,FBgn0033558,FBgn0050015,FBgn0061356,FBgn0033557,FBgn0027499,FBgn0033564,FBgn0050016,FBgn0005586,FBgn0024836,FBgn0033549,FBgn0050018,FBgn0033547,FBgn0033554,FBgn0263510,FBgn0027525,FBgn0033555,FBgn0033556,FBgn0010356,FBgn0033566,FBgn0033551,FBgn0029134,FBgn0086898,FBgn0033544,FBgn0053144
FBgn0265346	FBgn0027499,FBgn0050015,FBgn0061356,FBgn0033557,FBgn0033558,FBgn0033548,FBgn0033543,FBgn0033550,FBgn0033542,FBgn0024956,Novel000059,FBgn0029134,FBgn0033566,FBgn0086898,FBgn0033551,FBgn0033544,FBgn0053144,FBgn0010356,FBgn0263510,FBgn0033556,FBgn0027525,FBgn0033555,FBgn0033547,FBgn0033554,FBgn0033549,FBgn0050018,FBgn0024836,FBgn0033564,FBgn0005586,FBgn0050016
FBgn0265347	FBgn0010356,FBgn0033566,FBgn0029134,FBgn0086898,FBgn0033551,FBgn0053144,FBgn0033544,FBgn0033547,FBgn0033554,FBgn0027525,FBgn0263510,FBgn0033555,FBgn0033556,FBgn0024836,FBgn0033549,FBgn0050018,FBgn0033564,FBgn0050016,FBgn0005586,FBgn0027499,FBgn0033558,FBgn0061356,FBgn0050015,FBgn0033557,FBgn0033548,FBgn0033543,Novel000059,FBgn0033550,FBgn0033542,FBgn0024956
FBgn0265348	FBgn0010356,FBgn0033569,FBgn0053144,FBgn0033570,FBgn0027525,FBgn0033555,FBgn0050018,FBgn0050016,FBgn0050020,FBgn0050015,FBgn0033557,FBgn0033548,Novel000059,FBgn0017414,FBgn0033550,FBgn0033573,FBgn0033551,FBgn0033566,FBgn0086898,FBgn0029134,FBgn0033547,FBgn0033554,FBgn0263510,FBgn0033556,FBgn0033549,FBgn0033564,FBgn0033572,FBgn0027499,FBgn0033574,FBgn0033558,FBgn0033571,FBgn0061356
FBgn0265364	FBgn0050037,FBgn0033659,FBgn0050036,FBgn0033668,FBgn0259832,FBgn0262819,FBgn0085260,FBgn0085259,FBgn0033669,FBgn0033657,FBgn0033653,FBgn0033665,FBgn0000556,Novel000060,FBgn0026573,FBgn0033673,FBgn0011704,FBgn0033667,FBgn0033672,FBgn0260436,FBgn0260959,FBgn0033654,FBgn0004839,FBgn0013756,FBgn0053145,FBgn0033658,FBgn0260932,FBgn0033663,Novel000061,FBgn0033656,FBgn0033661
FBgn0265365	FBgn0033669,FBgn0010339,FBgn0085260,FBgn0033668,FBgn0050037,FBgn0262820,FBgn0050036,FBgn0260012,FBgn0033672,FBgn0086677,FBgn0028407,FBgn0265373,FBgn0026573,FBgn0011704,FBgn0033673,FBgn0259985,FBgn0033680,FBgn0004839,FBgn0053145,FBgn0033677,FBgn0050039,FBgn0004463,FBgn0024732,FBgn0033679,FBgn0267728
FBgn0265366	FBgn0266369,FBgn0032894,FBgn0262743,FBgn0032907,FBgn0051673,FBgn0067312,FBgn0032881,FBgn0032888,FBgn0032901,FBgn0067311,FBgn0051676,FBgn0032889,FBgn0032908,FBgn0028986,FBgn0011202,FBgn0263996,FBgn0053322,FBgn0032896,FBgn0032895,FBgn0032891,FBgn0051674,FBgn0032883,FBgn0032906,FBgn0000251,FBgn0032900,FBgn0051675,FBgn0032899,FBgn0032886,FBgn0032882,FBgn0250785,FBgn0032897,FBgn0032884
FBgn0265367	FBgn0004892,FBgn0051776,FBgn0031548,FBgn0031533,FBgn0051954,FBgn0053123,FBgn0031547,FBgn0266670,FBgn0031538,FBgn0031545,FBgn0031536,FBgn0031550,FBgn0000721,FBgn0014396,FBgn0015663,FBgn0031535,FBgn0031544,FBgn0031549,FBgn0031546,FBgn0021967,FBgn0264363,FBgn0031542,FBgn0002985,FBgn0031534,FBgn0005616,FBgn0261560,FBgn0031540,FBgn0031554,FBgn0024244,FBgn0051956
FBgn0265368	FBgn0031547,FBgn0004892,FBgn0051776,FBgn0031548,FBgn0053123,FBgn0051954,FBgn0031545,FBgn0031544,FBgn0031549,FBgn0031546,FBgn0021967,FBgn0264363,FBgn0031542,FBgn0031550,FBgn0000721,FBgn0085369,FBgn0014396,FBgn0015663,FBgn0261560,FBgn0005616,FBgn0024244,FBgn0031554,FBgn0051956,FBgn0031540,FBgn0002985
FBgn0265369	FBgn0031566,FBgn0259953,FBgn0031563,FBgn0031559,FBgn0259952,FBgn0031548,FBgn0262721,FBgn0031560,FBgn0004892,FBgn0031564,FBgn0259957,FBgn0262621,FBgn0031562,FBgn0085369,FBgn0000721,FBgn0259955,FBgn0031550,FBgn0259954,FBgn0031549,FBgn0051777,FBgn0259956,FBgn0031545,FBgn0040104,FBgn0031561,FBgn0051955,FBgn0261054,FBgn0031547,FBgn0051779,FBgn0002985,FBgn0051778,FBgn0031554,FBgn0024244,FBgn0015663,FBg…
FBgn0265370	FBgn0259956,FBgn0003386,FBgn0040104,FBgn0031561,FBgn0031568,FBgn0051955,FBgn0261054,FBgn0002985,FBgn0051779,FBgn0031554,FBgn0263842,FBgn0051778,FBgn0015376,FBgn0004893,FBgn0015663,FBgn0259951,FBgn0031558,FBgn0031566,FBgn0259952,FBgn0031563,FBgn0031559,FBgn0259953,FBgn0262721,FBgn0031560,FBgn0051960,FBgn0259957,FBgn0262621,FBgn0051958,FBgn0031564,FBgn0031562,FBgn0259955,FBgn0263846,FBgn0000721,FBg…
FBgn0265371	FBgn0033656,FBgn0033663,FBgn0013756,FBgn0260932,FBgn0033672,FBgn0260959,FBgn0011704,FBgn0033673,FBgn0033667,FBgn0259832,FBgn0033668,FBgn0085259,FBgn0033657,FBgn0050037,FBgn0260012,FBgn0033661,FBgn0267728,FBgn0259985,Novel000061,FBgn0033654,FBgn0004839,FBgn0033658,FBgn0053145,FBgn0260436,Novel000060,FBgn0026573,FBgn0262819,FBgn0033669,FBgn0085260,FBgn0000556,FBgn0033665,FBgn0033659,FBgn0050036
FBgn0265372	FBgn0033710,FBgn0033701,FBgn0264560,FBgn0033697,FBgn0033691,FBgn0020377,FBgn0000253,FBgn0262889,FBgn0033692,FBgn0033699,FBgn0261611,FBgn0033713,FBgn0000426,FBgn0033698,FBgn0050203,FBgn0085261,FBgn0027504,FBgn0033703,FBgn0033683,FBgn0033686,FBgn0033685,FBgn0263020,FBgn0033696,FBgn0033688,FBgn0033690,FBgn0026176,FBgn0053964,FBgn0010621,FBgn0061197,FBgn0033712,FBgn0263021,FBgn0040759,FBgn0025454,FBg…
FBgn0265374	FBgn0033708,FBgn0014184,FBgn0033717,FBgn0033687,FBgn0050046,FBgn0033706,FBgn0033702,FBgn0023167,FBgn0033690,FBgn0054021,FBgn0010621,FBgn0053964,FBgn0033715,FBgn0033712,FBgn0263021,FBgn0061197,FBgn0033705,FBgn0025454,FBgn0033693,FBgn0040759,FBgn0033699,FBgn0261611,FBgn0033692,FBgn0033716,FBgn0000426,FBgn0033698,FBgn0033713,FBgn0050203,FBgn0085261,FBgn0027504,FBgn0033688,FBgn0263020,FBgn0033696,FBg…
FBgn0265375	FBgn0262889,FBgn0050043,FBgn0033720,FBgn0266111,FBgn0000253,FBgn0033728,FBgn0033726,FBgn0050045,FBgn0264560,FBgn0053626,FBgn0261853,FBgn0033710,FBgn0033723,FBgn0050042,FBgn0053627,FBgn0033703,FBgn0033733,FBgn0033725,FBgn0263020,FBgn0050203,FBgn0033713,FBgn0033716,FBgn0261611,FBgn0033724,FBgn0033705,FBgn0061197,FBgn0033732,FBgn0050047,FBgn0263021,FBgn0033712,FBgn0033715,FBgn0053012,FBgn0054021,FBg…
FBgn0265377	FBgn0051464,FBgn0037556,FBgn0037571,FBgn0037566,FBgn0037570,FBgn0261290,FBgn0037578,FBgn0037579,FBgn0037565,FBgn0037555,FBgn0266801,FBgn0037562,FBgn0037583,FBgn0037576,FBgn0064126,FBgn0004908,FBgn0010433,FBgn0040529,FBgn0037561,FBgn0037574,FBgn0051463,FBgn0265351,FBgn0037569,FBgn0014861,FBgn0037584,FBgn0260386,FBgn0003129,FBgn0037554,FBgn0040528,FBgn0020249,FBgn0037581,FBgn0037553,FBgn0010173,FBg…
FBgn0265378	FBgn0039411,FBgn0002592,FBgn0002735,FBgn0002632,FBgn0002633,FBgn0051324,FBgn0039415,FBgn0039413,FBgn0083966,FBgn0260224,FBgn0002732,FBgn0001139,FBgn0002629,FBgn0002609,FBgn0039403,FBgn0039404,FBgn0002631,FBgn0015269,FBgn0002734,FBgn0083965,FBgn0002733,FBgn0002578,FBgn0028833,FBgn0266668,FBgn0039406,FBgn0051323,FBgn0000591,FBgn0039402,FBgn0051086,FBgn0039417,FBgn0039407,FBgn0262576,FBgn0039408,FBg…
FBgn0265379	FBgn0051324,FBgn0039415,Novel000158,FBgn0039413,FBgn0051323,FBgn0083965,FBgn0051086,FBgn0039420,FBgn0000064,FBgn0039417,FBgn0039411,FBgn0053970,FBgn0083966,FBgn0039419
FBgn0265380	FBgn0039419,FBgn0039421,FBgn0083965,FBgn0039420,FBgn0000064,FBgn0039417,FBgn0051086,FBgn0053970,FBgn0083966,Novel000158,FBgn0051323
FBgn0265381	FBgn0039078,FBgn0039071,FBgn0039069,FBgn0004882,FBgn0039077,FBgn0039075,FBgn0264326,FBgn0039070,FBgn0259194,FBgn0262009,FBgn0259193,FBgn0039073,FBgn0262010,FBgn0024509,FBgn0003118,FBgn0263777,FBgn0002622,FBgn0051515,FBgn0016119,FBgn0025781
FBgn0265382	FBgn0002622,FBgn0051515,FBgn0263777,FBgn0016119,FBgn0039079,FBgn0262009,FBgn0259193,FBgn0003118,FBgn0039073,FBgn0024509,FBgn0262010,FBgn0264326,FBgn0259194,FBgn0039077,FBgn0039075,FBgn0039080,FBgn0039078,FBgn0051225
FBgn0265383	FBgn0051515,FBgn0263777,FBgn0039086,FBgn0039079,FBgn0259193,FBgn0085318,Novel000185,FBgn0039089,FBgn0039084,FBgn0039081,FBgn0259194,FBgn0039077,FBgn0039085,FBgn0039083,FBgn0039087,FBgn0039080,FBgn0039088,FBgn0039078,FBgn0051225
FBgn0265414	FBgn0031887,FBgn0000053,FBgn0051907,FBgn0031888,FBgn0004838,FBgn0031869,FBgn0031877,FBgn0052829,FBgn0020616,FBgn0051908,FBgn0031871,FBgn0031875,FBgn0003046,FBgn0031873,FBgn0262872,FBgn0031883,FBgn0026196,FBgn0031876,FBgn0031872,FBgn0031866,FBgn0031881,FBgn0016978,FBgn0263026,FBgn0031874,FBgn0266666,FBgn0031882,FBgn0021944,FBgn0031885,FBgn0011737,FBgn0028554,FBgn0262877,FBgn0031879,FBgn0264922,FBg…
FBgn0265418	FBgn0037548,FBgn0037550,FBgn0262362,FBgn0010812,FBgn0037540,FBgn0001255,FBgn0037543,FBgn0040524,FBgn0037537,FBgn0037546,FBgn0037539,FBgn0037536,FBgn0037544,FBgn0037551,FBgn0037541,FBgn0263596,FBgn0037534,FBgn0243512,FBgn0266598,FBgn0037547,FBgn0037538,FBgn0262363,FBgn0001138,FBgn0037549,FBgn0037535
FBgn0265419	FBgn0037543,FBgn0037540,FBgn0010812,FBgn0001255,FBgn0037548,FBgn0037550,FBgn0262362,FBgn0037539,FBgn0261290,FBgn0037546,FBgn0243512,FBgn0037551,FBgn0037541,FBgn0263596,FBgn0037544,FBgn0037549,FBgn0262363,FBgn0001138,FBgn0037547
FBgn0265420	FBgn0015574,FBgn0083963,FBgn0015568,FBgn0015571,FBgn0015570,FBgn0015831,FBgn0037512,FBgn0051146,FBgn0261393,FBgn0267105,FBgn0015572,FBgn0003885
FBgn0265421	FBgn0267337,FBgn0004174,FBgn0037486,FBgn0004172,FBgn0028400,FBgn0262982,FBgn0037500,FBgn0037489,FBgn0011282,FBgn0051496,FBgn0004173,FBgn0037498,FBgn0001112,FBgn0045843,FBgn0037490,FBgn0037487,FBgn0260713,FBgn0004175,FBgn0086372,FBgn0265423,FBgn0037485,FBgn0051501,FBgn0037483,FBgn0037482,FBgn0037493,FBgn0015770,FBgn0037488,FBgn0037492,FBgn0037491,FBgn0250845
FBgn0265422	FBgn0045843,FBgn0037490,FBgn0037501,FBgn0004173,FBgn0037498,FBgn0011282,FBgn0051496,FBgn0001112,FBgn0037500,FBgn0037489,FBgn0004174,FBgn0267337,FBgn0028400,FBgn0262982,FBgn0037486,FBgn0004172,FBgn0037492,FBgn0037491,FBgn0015770,FBgn0037488,FBgn0265423,FBgn0261502,FBgn0051501,FBgn0037493,FBgn0037485,FBgn0260713,FBgn0037487,FBgn0004175
FBgn0265424	FBgn0262982,FBgn0028400,FBgn0004172,FBgn0054023,FBgn0004174,FBgn0267337,FBgn0037489,FBgn0037500,FBgn0001112,FBgn0037501,FBgn0037498,FBgn0004173,FBgn0011282,FBgn0051496,FBgn0037490,FBgn0045843,FBgn0004175,FBgn0260713,FBgn0037487,FBgn0051544,FBgn0261502,FBgn0037493,FBgn0051501,FBgn0037502,FBgn0265423,FBgn0037488,FBgn0015770,FBgn0037491,FBgn0037492
FBgn0265425	FBgn0045843,FBgn0037490,FBgn0004173,FBgn0037501,FBgn0037498,FBgn0051496,FBgn0011282,FBgn0001112,FBgn0037500,FBgn0037489,FBgn0004174,FBgn0267337,FBgn0262982,FBgn0028400,FBgn0004172,FBgn0054023,FBgn0037492,FBgn0037491,FBgn0015770,FBgn0037488,FBgn0037502,FBgn0265423,FBgn0051544,FBgn0261502,FBgn0051501,FBgn0037493,FBgn0260713,FBgn0037487,FBgn0004175
FBgn0265426	FBgn0086372,FBgn0004175,FBgn0260713,FBgn0037487,FBgn0037493,FBgn0051501,FBgn0037483,FBgn0037485,FBgn0037482,FBgn0265423,FBgn0037488,FBgn0037491,FBgn0250845,FBgn0037492,FBgn0262982,FBgn0028400,FBgn0037486,FBgn0002306,FBgn0004174,FBgn0267337,FBgn0037489,FBgn0037500,FBgn0001112,FBgn0037498,FBgn0051496,FBgn0011282,FBgn0037490,FBgn0045843
FBgn0265427	FBgn0265623,FBgn0033782,FBgn0053798,FBgn0004512,FBgn0033781,FBgn0033783,FBgn0033791,FBgn0265186,FBgn0033787,FBgn0265185,FBgn0033785,FBgn0005624,FBgn0003975,FBgn0033784,FBgn0010488,FBgn0050487,FBgn0033789,FBgn0033788
FBgn0265428	FBgn0031033,FBgn0031031,FBgn0031034,FBgn0000257,FBgn0027291,FBgn0031026,FBgn0052533,FBgn0020261,FBgn0040890,FBgn0031032,FBgn0031016,FBgn0261573,FBgn0052532,FBgn0031022,FBgn0031021,FBgn0031023,FBgn0031030,FBgn0031020,FBgn0026430,FBgn0044030,FBgn0031018,FBgn0027621
FBgn0265443	FBgn0033816,FBgn0033813,FBgn0085341,FBgn0033821,FBgn0053137,FBgn0033826,FBgn0085264,FBgn0259219,FBgn0033812,FBgn0020370,FBgn0033817,FBgn0005654,FBgn0033806,FBgn0033820,FBgn0050058,Novel000093,FBgn0002789,FBgn0027079,FBgn0033810,FBgn0033798,FBgn0033827,FBgn0085344,FBgn0033818,FBgn0053182,FBgn0033808,FBgn0033809,FBgn0053138,FBgn0028991,FBgn0033799,FBgn0011763,FBgn0033815,Novel000092,FBgn0086532,FBg…
FBgn0265444	FBgn0028953,FBgn0034215,FBgn0050101,FBgn0034219,FBgn0021818,FBgn0016697,FBgn0034225,FBgn0034210,FBgn0050104,FBgn0262570,FBgn0263233,FBgn0022987,FBgn0024196,FBgn0034221,FBgn0022029,FBgn0034217,FBgn0034214,FBgn0027506,FBgn0025716,FBgn0010620,FBgn0265487,FBgn0034224,FBgn0034218,FBgn0028956,FBgn0034223
FBgn0265445	FBgn0011274,FBgn0032637,FBgn0051804,FBgn0032635,FBgn0020503,FBgn0085199,FBgn0267255,FBgn0053928,FBgn0260632,FBgn0032636,FBgn0032638,FBgn0051803,FBgn0032633,FBgn0032632,FBgn0032631,FBgn0032634,FBgn0032629
FBgn0265446	FBgn0267255,FBgn0053928,FBgn0260632,FBgn0051804,FBgn0032635,FBgn0020503,FBgn0085199,FBgn0000183,FBgn0032639,FBgn0011274,FBgn0032637,FBgn0032634,FBgn0032632,FBgn0032631,FBgn0032638,FBgn0051803,FBgn0032633,FBgn0032636
FBgn0265447	FBgn0036105,FBgn0036102,FBgn0036107,FBgn0036104,FBgn0036108,FBgn0036111,FBgn0262890,FBgn0036110,FBgn0026160,FBgn0027615,FBgn0036106,FBgn0036109,FBgn0262020
FBgn0265448	FBgn0036024,FBgn0036031,FBgn0044048,FBgn0264489,FBgn0045823,FBgn0087040,FBgn0261530,FBgn0259163,FBgn0036035,FBgn0036040,FBgn0036043,FBgn0028429,FBgn0036039,FBgn0036044,FBgn0036028,FBgn0036030,FBgn0044328,FBgn0044050,FBgn0036038,FBgn0016081,FBgn0015321,FBgn0036036,FBgn0015618,FBgn0036029,FBgn0040475,FBgn0004390,FBgn0044051,FBgn0036032,FBgn0053696,FBgn0036046,FBgn0019644,FBgn0044049
FBgn0265449	FBgn0038515,FBgn0004554,FBgn0264899,FBgn0025571,FBgn0261046,FBgn0038516,FBgn0038511,FBgn0000564,FBgn0038523,FBgn0038524,FBgn0003375,FBgn0040565,FBgn0038519,FBgn0085310,FBgn0038509,FBgn0038526,FBgn0262023,FBgn0010926,FBgn0262024,FBgn0038512,FBgn0038525,FBgn0038527,FBgn0038510,FBgn0264005
FBgn0265450	FBgn0039025,FBgn0039016,FBgn0086253,FBgn0039013,FBgn0039015,FBgn0039024,FBgn0039019,FBgn0039027,FBgn0262538,FBgn0262537,FBgn0039028,FBgn0039030,FBgn0024958,FBgn0262539,FBgn0262540,FBgn0039023,FBgn0263143,FBgn0039029,FBgn0039020,FBgn0039017,FBgn0039026,FBgn0017590,FBgn0039022,FBgn0266409,FBgn0040588,FBgn0051139,FBgn0262541
FBgn0265452	FBgn0051708,FBgn0032084,FBgn0052984,FBgn0032094,FBgn0051609,FBgn0032088,FBgn0085427,FBgn0032080,FBgn0032079,FBgn0032078,FBgn0040963,FBgn0032074,FBgn0032076,FBgn0011705,FBgn0032075,FBgn0032082,FBgn0015316,FBgn0032096,FBgn0032085,FBgn0032086,FBgn0032077,FBgn0032090,FBgn0013746,FBgn0040964,FBgn0032095,FBgn0052982,FBgn0052985,FBgn0032083,FBgn0032089,FBgn0032087
FBgn0265453	FBgn0030659,FBgn0030648,FBgn0030660,FBgn0026433,FBgn0030642,FBgn0004391,FBgn0030655,FBgn0267977,FBgn0030645,FBgn0030654,FBgn0040285,FBgn0030647,FBgn0259196,FBgn0030653,FBgn0030643,FBgn0003463,FBgn0259195,FBgn0022710,FBgn0030657,FBgn0030638,FBgn0027287,FBgn0030658,FBgn0030663,FBgn0030662,FBgn0030661,FBgn0014455,FBgn0030640,FBgn0030641
FBgn0265454	FBgn0027287,FBgn0030663,FBgn0030658,FBgn0030662,FBgn0030661,FBgn0030640,FBgn0014455,FBgn0030641,FBgn0030654,FBgn0030647,FBgn0040285,FBgn0030653,FBgn0259196,FBgn0030643,FBgn0003463,FBgn0259195,FBgn0030657,FBgn0022710,FBgn0030638,FBgn0004391,FBgn0030655,FBgn0267977,FBgn0030645,FBgn0030659,FBgn0030648,FBgn0026433,FBgn0030660,FBgn0030642
FBgn0265457	FBgn0085366,Novel000221,FBgn0262827,FBgn0029950,FBgn0029941,FBgn0024250,FBgn0029943,FBgn0026144,FBgn0025549,FBgn0261849,FBgn0029936,FBgn0029932,FBgn0029935,FBgn0027342,FBgn0040923,FBgn0040922,FBgn0029942,FBgn0261848,FBgn0029939,FBgn0052726,FBgn0029949,FBgn0029946,FBgn0029948,FBgn0029945,FBgn0264270,FBgn0261615,FBgn0259098,FBgn0265265,FBgn0029940,FBgn0029947,FBgn0029937,FBgn0261616,FBgn0029944
FBgn0265458	FBgn0030277,FBgn0052667,FBgn0030259,FBgn0030266,FBgn0030260,FBgn0030270,FBgn0052668,FBgn0265535,FBgn0030272,FBgn0030257,FBgn0030268,FBgn0010391,FBgn0030274,FBgn0026268,FBgn0030271,FBgn0028686,FBgn0259241,FBgn0027498,FBgn0030276,FBgn0030262,FBgn0030269,FBgn0003366,FBgn0261277,FBgn0030263,FBgn0030261,FBgn0020255,FBgn0030258,FBgn0015245,FBgn0259101
FBgn0265467	FBgn0052241,FBgn0035528,FBgn0052251,FBgn0040699,FBgn0035537,FBgn0035547,FBgn0035524,FBgn0053514,FBgn0052250,FBgn0035526,FBgn0035546,FBgn0066365,FBgn0052240,FBgn0035522,FBgn0035529,FBgn0000038,FBgn0261952,FBgn0035550,FBgn0035545,FBgn0035541,FBgn0015829,FBgn0041630,FBgn0035548,FBgn0035538,FBgn0052249,FBgn0035533,FBgn0035544,FBgn0035532,FBgn0035534,FBgn0035542,FBgn0035540,FBgn0035543,FBgn0052248,FBg…
FBgn0265468	FBgn0041094,FBgn0265469,FBgn0036150,FBgn0036154,FBgn0036153,FBgn0036156,FBgn0036152,FBgn0036155,FBgn0261553
FBgn0265470	FBgn0036159,FBgn0036160,FBgn0036156,FBgn0036155,FBgn0036157,FBgn0028668,FBgn0036162,FBgn0028667,FBgn0036158,FBgn0036161,FBgn0265469,FBgn0036154,FBgn0036153,FBgn0036165
FBgn0265496	FBgn0000633,FBgn0024556,FBgn0262360,FBgn0053156,FBgn0033862,FBgn0033860,FBgn0033845,FBgn0033851,FBgn0033856,FBgn0033863,FBgn0033846,FBgn0000119,FBgn0027581,FBgn0033864,FBgn0033855,FBgn0260964,FBgn0261990,FBgn0040477,FBgn0262821,FBgn0033861,FBgn0266489,FBgn0033848,FBgn0033853,FBgn0033859,FBgn0014877,FBgn0004638,FBgn0033842,FBgn0085265,FBgn0033844,FBgn0261989,FBgn0033850
FBgn0265497	FBgn0033863,FBgn0033846,FBgn0033855,FBgn0000119,FBgn0027581,FBgn0033864,FBgn0033862,FBgn0033845,FBgn0033860,FBgn0000633,FBgn0053156,FBgn0262360,FBgn0024556,FBgn0033856,FBgn0033851,FBgn0033842,FBgn0033850,FBgn0033844,FBgn0085265,FBgn0261989,FBgn0033861,FBgn0262821,FBgn0266489,FBgn0033848,FBgn0260964,FBgn0040477,FBgn0261990,FBgn0033859,FBgn0014877,FBgn0004638,FBgn0033853
FBgn0265500	FBgn0085471,FBgn0085408,FBgn0050072,FBgn0033934,FBgn0085473,FBgn0261823,FBgn0085213,FBgn0050073,FBgn0033926,FBgn0050075,FBgn0050074,FBgn0033933,FBgn0261613,FBgn0033935,FBgn0033931,FBgn0033928,FBgn0033932,FBgn0267824,FBgn0085214,FBgn0033936,FBgn0050067,FBgn0033929,FBgn0085472,FBgn0024698,FBgn0013725,FBgn0033924,FBgn0033925
FBgn0265509	FBgn0265194,FBgn0026370,FBgn0034005,FBgn0000996,FBgn0011660,FBgn0034011,FBgn0034007,FBgn0034013,FBgn0004698,FBgn0050472,FBgn0263980,FBgn0034008,FBgn0034012,FBgn0085217,FBgn0003328,FBgn0259878,FBgn0014865,FBgn0034009,FBgn0034010,FBgn0013750
FBgn0265511	FBgn0034050,FBgn0034057,FBgn0034052,FBgn0034060,FBgn0034051,FBgn0050085,FBgn0034047,FBgn0053463,FBgn0034059,FBgn0264089,FBgn0034045,FBgn0034066,FBgn0034053,FBgn0020236,FBgn0034049,FBgn0050093,FBgn0034062,FBgn0265991,FBgn0265045,FBgn0034063,FBgn0003130,FBgn0034058,FBgn0034061,FBgn0053465,FBgn0010590,FBgn0034046,FBgn0034065,FBgn0015247,FBgn0034054,FBgn0022160
FBgn0265524	FBgn0031149,FBgn0031150,FBgn0064123,FBgn0031157,FBgn0031146,FBgn0031145,FBgn0052521,FBgn0031164,FBgn0052523,FBgn0031159,FBgn0052512,FBgn0031142,FBgn0031163,FBgn0003950,FBgn0031148,FBgn0031155,FBgn0025814,FBgn0266647,FBgn0031161,FBgn0083956,FBgn0031144,FBgn0031143
FBgn0265526	FBgn0050462,FBgn0034181,FBgn0026721,FBgn0034175,FBgn0085220,FBgn0085219,FBgn0034187,FBgn0034180,FBgn0034184,FBgn0034165,FBgn0046999,FBgn0034183,FBgn0086350,FBgn0265174,FBgn0262513,FBgn0034162,FBgn0003091,FBgn0004580,FBgn0034179,FBgn0050461,FBgn0263864,FBgn0264330,FBgn0085444,Novel000099,FBgn0034173,FBgn0263114,FBgn0025833,FBgn0263032,FBgn0026402,FBgn0264329,Novel000098,FBgn0034176,FBgn0034172,FBg…
FBgn0265527	FBgn0034183,FBgn0086350,FBgn0034162,FBgn0003091,FBgn0262513,FBgn0265174,FBgn0034187,FBgn0034180,FBgn0034184,FBgn0034165,FBgn0046999,FBgn0034175,FBgn0085220,FBgn0085219,FBgn0050462,FBgn0026721,FBgn0034181,FBgn0023172,FBgn0034172,FBgn0004784,FBgn0034166,FBgn0034168,FBgn0034186,FBgn0034177,FBgn0034182,FBgn0263033,FBgn0025827,FBgn0264329,FBgn0034176,Novel000098,Novel000099,FBgn0025833,FBgn0263114,FBg…
FBgn0265529	FBgn0026754,Novel000095,FBgn0259738,FBgn0025833,FBgn0267002,FBgn0034151,FBgn0010213,FBgn0085488,FBgn0034166,FBgn0014870,FBgn0028737,FBgn0034154,FBgn0004784,FBgn0034158,FBgn0053544,FBgn0025827,FBgn0025832,FBgn0011743,Novel000096,FBgn0040743,FBgn0034157,FBgn0034156,FBgn0034159,FBgn0053530,FBgn0085489,FBgn0026533,FBgn0034153,FBgn0050463,FBgn0034162,Novel000097,FBgn0015584,FBgn0259967,FBgn0085218,FBg…
FBgn0265530	FBgn0053530,FBgn0026533,FBgn0085489,FBgn0034156,FBgn0034157,Novel000096,FBgn0040743,FBgn0034159,FBgn0085218,FBgn0259967,FBgn0015584,FBgn0034165,FBgn0034160,FBgn0034152,FBgn0025830,FBgn0046999,FBgn0034153,FBgn0034162,Novel000097,FBgn0050463,FBgn0010213,FBgn0034151,FBgn0085488,FBgn0259738,FBgn0026754,Novel000095,FBgn0267002,FBgn0025833,FBgn0025832,FBgn0011743,FBgn0034154,FBgn0004784,FBgn0028737,FBg…
FBgn0265531	FBgn0040395,FBgn0000382,FBgn0000667,FBgn0023507,FBgn0264562,FBgn0005670,FBgn0025627,FBgn0004655,FBgn0003964,FBgn0040394,FBgn0025629,FBgn0025626,FBgn0029596,FBgn0025625,FBgn0004654,FBgn0025628,FBgn0025624,FBgn0025630,FBgn0004860,FBgn0004861,FBgn0023540,FBgn0025631,FBgn0261954,FBgn0023545,FBgn0025632,FBgn0013432,FBgn0026878
FBgn0265532	FBgn0003964,FBgn0025627,FBgn0004655,FBgn0264562,FBgn0005670,FBgn0025626,FBgn0025629,FBgn0040394,FBgn0000667,FBgn0023507,FBgn0040395,FBgn0000382,FBgn0025632,FBgn0023540,FBgn0023545,FBgn0261954,FBgn0025631,FBgn0004861,FBgn0004860,FBgn0026878,FBgn0013432,FBgn0004654,FBgn0025625,FBgn0029596,FBgn0025630,FBgn0025624,FBgn0025628
FBgn0265534	FBgn0030675,FBgn0030683,FBgn0065035,FBgn0030696,FBgn0053172,FBgn0030674,FBgn0000319,FBgn0001092,FBgn0030687,FBgn0030673,FBgn0030676,FBgn0030679,FBgn0030684,FBgn0030697,FBgn0026076,FBgn0030701,FBgn0002914,FBgn0030691,FBgn0052581,Novel000208,FBgn0030672,FBgn0027329,FBgn0010315,FBgn0003392,FBgn0030693,FBgn0027093,FBgn0263748,FBgn0030694,FBgn0030685,FBgn0030700,FBgn0030704,FBgn0001105,FBgn0030678,FBg…
FBgn0265537	FBgn0262568,FBgn0034201,FBgn0034191,FBgn0034200,FBgn0265487,FBgn0083936,FBgn0262563,FBgn0262567,FBgn0010591,FBgn0050456,FBgn0034205,FBgn0050457,FBgn0034196,FBgn0262882,FBgn0050458,FBgn0046294,FBgn0034195,FBgn0034204,FBgn0034198,FBgn0034206,FBgn0050460,FBgn0034199,FBgn0034197,FBgn0000078,FBgn0010226,FBgn0034194,FBgn0000079,FBgn0262961,FBgn0034202
FBgn0265538	FBgn0046294,FBgn0034195,FBgn0034204,FBgn0262882,FBgn0034196,FBgn0050458,FBgn0034206,FBgn0034198,FBgn0265487,FBgn0083936,FBgn0034201,FBgn0262568,FBgn0034191,FBgn0034200,FBgn0034205,FBgn0050457,FBgn0262567,FBgn0010591,FBgn0262563,FBgn0050456,FBgn0034194,FBgn0000079,FBgn0262961,FBgn0034202,FBgn0034199,FBgn0050460,FBgn0000078,FBgn0010226,FBgn0034197
FBgn0265539	FBgn0050458,FBgn0262882,FBgn0034196,FBgn0034204,FBgn0034195,FBgn0046294,FBgn0034198,FBgn0034206,FBgn0034200,FBgn0034191,FBgn0262568,FBgn0034201,FBgn0083936,FBgn0265487,FBgn0050456,FBgn0010591,FBgn0262567,FBgn0262563,FBgn0050457,FBgn0034205,FBgn0000079,FBgn0034194,FBgn0034202,FBgn0262961,FBgn0034199,FBgn0034197,FBgn0010226,FBgn0000078
FBgn0265542	FBgn0032613,FBgn0000406,FBgn0266492,Novel000020,FBgn0264695,FBgn0022213,FBgn0086673,FBgn0040260,FBgn0052832,FBgn0051739,FBgn0051806,FBgn0051810,FBgn0260758,FBgn0032612,FBgn0032609,FBgn0004797,FBgn0032614,FBgn0265579,FBgn0085342,FBgn0051809,FBgn0040262,FBgn0032615,FBgn0026150,FBgn0032603,FBgn0032620,FBgn0040261,FBgn0053179,FBgn0261671,Novel000019,FBgn0040985,FBgn0032618,FBgn0051805,FBgn0266491
FBgn0265543	FBgn0032614,FBgn0265579,FBgn0032624,FBgn0032615,FBgn0026150,FBgn0085342,FBgn0051809,FBgn0032625,Novel000020,FBgn0261671,FBgn0053179,FBgn0052832,FBgn0032620,FBgn0032618,FBgn0260758,FBgn0051805,FBgn0051806,FBgn0051810,FBgn0040985,Novel000019
FBgn0265545	FBgn0046888,FBgn0045485,FBgn0045486,FBgn0032632,FBgn0085198,FBgn0032631,FBgn0085199,FBgn0045487,FBgn0265607,FBgn0083942,FBgn0267255,FBgn0032629
FBgn0265546	FBgn0085198,FBgn0032632,FBgn0045486,FBgn0085199,FBgn0032631,FBgn0046888,FBgn0045485,FBgn0267255,FBgn0032629,FBgn0045487,FBgn0265607,FBgn0083942
FBgn0265547	FBgn0032656,FBgn0261358,FBgn0051742,FBgn0040989,FBgn0032658,FBgn0023096,FBgn0262960,FBgn0243486,FBgn0032660,FBgn0261357,FBgn0262018,FBgn0051740,FBgn0261531
FBgn0265548	FBgn0261357,FBgn0262018,FBgn0051740,FBgn0261531,FBgn0032656,FBgn0261358,FBgn0051742,FBgn0032658,FBgn0040989,FBgn0023096,FBgn0262960,FBgn0243486,FBgn0032660
FBgn0265549	FBgn0261358,FBgn0032656,FBgn0051742,FBgn0032658,FBgn0040989,FBgn0023096,FBgn0262960,FBgn0032660,FBgn0243486,FBgn0261357,FBgn0262018,FBgn0051740,FBgn0261531
FBgn0265550	FBgn0038808,FBgn0067783,FBgn0038805,FBgn0016917,Novel000152,FBgn0023212,FBgn0038797,FBgn0002869,FBgn0038803,FBgn0054008,FBgn0038796,FBgn0043457,FBgn0038798,FBgn0262146,FBgn0053192,FBgn0067782,FBgn0038804,FBgn0038806,FBgn0038809,FBgn0040575,FBgn0038795,FBgn0262869,FBgn0038799
FBgn0265551	FBgn0262869,FBgn0038799,FBgn0038795,FBgn0040575,FBgn0038809,FBgn0038806,FBgn0067782,FBgn0038804,FBgn0053192,FBgn0262146,FBgn0038798,FBgn0043457,FBgn0038796,FBgn0054008,FBgn0038803,FBgn0002869,FBgn0038797,FBgn0023212,Novel000152,FBgn0016917,FBgn0038805,FBgn0067783,FBgn0014029,FBgn0038808
FBgn0265577	FBgn0034258,FBgn0034278,FBgn0034262,FBgn0260763,FBgn0034261,FBgn0034269,FBgn0265576,FBgn0003545,FBgn0050105,FBgn0034276,FBgn0260764,FBgn0034263,FBgn0034248,FBgn0034247,FBgn0004400,FBgn0027572,FBgn0250868,FBgn0029006,FBgn0050106,FBgn0034272,FBgn0034259,FBgn0034255,FBgn0034267,FBgn0034265,FBgn0034270,FBgn0034274,FBgn0034245,FBgn0029079,FBgn0261501,FBgn0034264,FBgn0085224,FBgn0050109,FBgn0022740,FBg…
FBgn0265580	FBgn0032280,FBgn0032276,FBgn0032295,FBgn0267254,FBgn0051869,FBgn0011676,FBgn0265264,FBgn0051871,FBgn0051870,FBgn0032293,FBgn0032282,FBgn0027550,FBgn0024740,FBgn0051872,FBgn0027868,FBgn0040496,FBgn0032292,FBgn0032291,FBgn0032286,FBgn0032271,FBgn0032299,FBgn0032290,FBgn0032296,FBgn0032298,FBgn0032283,FBgn0043825,FBgn0032294,FBgn0015320,FBgn0032289,FBgn0023496,FBgn0032285,FBgn0032281,FBgn0032297,FBg…
FBgn0265581	FBgn0032620,FBgn0032624,FBgn0265579,FBgn0053179,FBgn0261671,FBgn0032625,FBgn0040985,FBgn0051806,FBgn0085342,FBgn0051805,FBgn0260758,FBgn0032618,FBgn0026150
FBgn0265582	FBgn0032637,FBgn0032646,FBgn0032640,FBgn0011274,FBgn0032639,FBgn0020503,FBgn0032648,FBgn0000183,FBgn0003187,FBgn0051804,FBgn0032635,FBgn0027885,FBgn0053928,FBgn0260632,FBgn0032645,FBgn0032643,FBgn0032649,FBgn0032647,FBgn0032636,FBgn0051803,FBgn0032633,FBgn0013810,FBgn0032642,FBgn0262856,FBgn0032638,FBgn0262857,FBgn0024689,FBgn0263654,FBgn0032634,FBgn0032644
FBgn0265583	FBgn0262356,FBgn0032645,FBgn0032648,FBgn0032654,FBgn0003187,FBgn0032651,FBgn0013810,FBgn0015609,FBgn0032650,FBgn0032652,FBgn0032646,FBgn0032649,FBgn0032647,FBgn0261089
FBgn0265584	FBgn0032645,FBgn0262356,FBgn0003187,FBgn0032648,FBgn0032654,FBgn0015609,FBgn0013810,FBgn0032650,FBgn0032651,FBgn0032646,FBgn0032652,FBgn0032647,FBgn0261089,FBgn0032649
FBgn0265585	FBgn0262356,FBgn0032654,FBgn0032648,FBgn0015609,FBgn0032650,FBgn0013810,FBgn0032651,FBgn0032647,FBgn0262876,FBgn0261089,FBgn0032649,FBgn0032652
FBgn0265586	FBgn0032650,FBgn0015609,FBgn0013810,FBgn0032651,FBgn0261089,FBgn0262876,FBgn0032649,FBgn0032652,FBgn0262356,FBgn0032654,FBgn0032648
FBgn0265587	FBgn0052988,FBgn0052985,FBgn0032069,FBgn0261627,FBgn0052983,FBgn0052986,FBgn0032077,FBgn0032067,FBgn0032068,FBgn0032066,FBgn0032072,FBgn0032082,FBgn0032075,FBgn0032076,FBgn0261630,FBgn0032074,FBgn0032078,FBgn0032079,FBgn0029123,FBgn0032080,FBgn0052987,FBgn0085427,FBgn0052984
FBgn0265588	FBgn0032074,FBgn0032076,FBgn0261630,FBgn0011705,FBgn0032075,FBgn0032082,FBgn0032072,FBgn0052984,FBgn0032084,FBgn0052987,FBgn0085427,FBgn0029123,FBgn0032080,FBgn0032078,FBgn0040963,FBgn0032079,FBgn0032083,FBgn0052985,FBgn0052988,FBgn0032077,FBgn0052983,FBgn0052986
FBgn0265590	FBgn0261362,FBgn0026316,FBgn0028743,FBgn0028744,FBgn0028741,FBgn0259211,FBgn0003140,FBgn0050323,FBgn0028740,FBgn0026309,FBgn0050110,FBgn0034279,FBgn0011589,FBgn0041585,FBgn0034281,FBgn0034283,FBgn0015522,FBgn0034282,FBgn0250851,FBgn0050325,FBgn0034284,FBgn0003701
FBgn0265591	FBgn0050110,FBgn0034281,FBgn0041585,FBgn0011589,FBgn0034291,FBgn0034294,FBgn0034282,FBgn0003701,FBgn0034292,FBgn0034284,FBgn0034286,FBgn0050325,FBgn0034290,FBgn0034283,FBgn0261362,FBgn0034295,FBgn0034289,FBgn0054005,FBgn0034288,FBgn0003140,FBgn0034293
FBgn0265592	FBgn0034299,FBgn0034300,FBgn0034295,FBgn0034289,FBgn0054005,FBgn0003140,FBgn0034288,FBgn0034301,FBgn0034293,FBgn0085415,FBgn0011589,FBgn0034291,FBgn0034294,FBgn0034292,FBgn0034286,FBgn0034296,FBgn0034290
FBgn0265593	FBgn0053958,FBgn0034315,FBgn0000057,FBgn0034323,FBgn0034313,FBgn0260392,FBgn0050114,FBgn0034307,FBgn0034322,FBgn0034321,FBgn0034314,FBgn0040737,FBgn0034324,FBgn0034318,FBgn0062440,FBgn0022238,FBgn0034325,FBgn0027836,FBgn0034317,FBgn0260401,FBgn0034310,FBgn0266420,FBgn0010575,FBgn0034308,FBgn0000658,FBgn0034327,FBgn0034326,FBgn0034312,FBgn0034304,FBgn0053198
FBgn0265594	FBgn0034325,FBgn0027836,FBgn0022238,FBgn0034317,FBgn0260401,FBgn0034310,FBgn0266420,FBgn0034324,FBgn0034318,FBgn0010575,FBgn0034308,FBgn0000658,FBgn0034312,FBgn0034327,FBgn0034326,FBgn0053198,FBgn0034313,FBgn0034323,FBgn0053958,FBgn0034315,FBgn0034321,FBgn0034322,FBgn0034314,FBgn0040737,FBgn0260392,FBgn0050114,FBgn0034307
FBgn0265596	FBgn0030662,FBgn0030674,FBgn0030663,FBgn0030676,FBgn0030658,FBgn0030666,FBgn0030673,FBgn0026666,FBgn0030665,FBgn0011741,FBgn0030661,FBgn0030675,FBgn0030654,FBgn0030670,FBgn0030664,FBgn0030667,FBgn0030657,FBgn0022710,FBgn0259195,FBgn0003463,FBgn0030668,FBgn0259196,FBgn0030653,FBgn0030655,FBgn0030669,FBgn0030659,FBgn0030672,FBgn0030660,FBgn0030671
FBgn0265609	FBgn0030502,FBgn0052631,FBgn0030499,FBgn0030503,FBgn0030495,FBgn0004169,FBgn0052633,FBgn0030492,FBgn0086674,FBgn0030493,FBgn0265416,FBgn0030504,FBgn0030494,FBgn0030500,FBgn0030501,FBgn0030505,FBgn0085353,FBgn0265610
FBgn0265611	FBgn0015926,FBgn0030629,FBgn0004924,FBgn0030622,FBgn0030625,FBgn0030630,FBgn0052588,FBgn0000028,FBgn0030634,FBgn0030624,FBgn0030623,FBgn0263257,FBgn0262486,FBgn0003132,FBgn0030620,FBgn0026428,FBgn0030631,FBgn0262485,Novel000235,FBgn0030628,FBgn0261703
FBgn0265612	FBgn0261703,FBgn0030623,FBgn0030624,Novel000235,FBgn0030616,FBgn0052588,FBgn0262485,FBgn0030617,FBgn0030625,FBgn0260006,FBgn0030622,FBgn0004924,FBgn0030620,FBgn0262486,FBgn0263994
FBgn0265613	FBgn0040648,FBgn0031161,FBgn0025814,FBgn0031155,FBgn0031148,FBgn0031144,FBgn0031143,FBgn0083956,FBgn0031157,FBgn0031145,FBgn0031141,FBgn0031146,FBgn0031149,FBgn0011834,FBgn0064123,FBgn0031150,FBgn0031142,FBgn0052512,FBgn0003950,FBgn0031159,FBgn0265608
FBgn0265614	FBgn0034425,FBgn0004003,FBgn0264753,FBgn0034427,FBgn0263395,FBgn0034429,FBgn0034426,FBgn0034430,FBgn0053454,FBgn0034428,FBgn0034435,FBgn0053453,FBgn0003254,FBgn0034432,FBgn0034422,FBgn0054045,FBgn0034420,FBgn0034423,FBgn0086358,FBgn0034433,FBgn0034436,FBgn0010434,FBgn0000578,FBgn0013954
FBgn0265633	FBgn0052000,FBgn0267363,FBgn0085432,FBgn0017545,FBgn0004859,FBgn0025740,FBgn0011747
FBgn0265635	FBgn0265003,FBgn0033100,FBgn0042083,FBgn0040674,FBgn0085421,FBgn0050158,FBgn0028988,FBgn0033112,FBgn0265137,FBgn0085244,FBgn0022224,FBgn0033101,FBgn0033110,FBgn0265935,FBgn0014028,FBgn0027066,FBgn0010482,FBgn0033113,FBgn0028579,FBgn0033108,FBgn0000473,FBgn0033104,FBgn0033115
FBgn0265636	FBgn0026389,FBgn0024294,FBgn0003090,FBgn0027558,FBgn0033129,FBgn0033141,FBgn0033145,FBgn0050384,FBgn0016032,FBgn0033149,FBgn0033134,FBgn0033138,FBgn0033135,FBgn0033136,FBgn0002930,FBgn0033132,FBgn0033139,FBgn0263934,FBgn0033140,FBgn0015038,FBgn0053914,FBgn0033137,FBgn0015039,FBgn0033133,FBgn0044011,FBgn0050385,FBgn0033130,FBgn0024293,FBgn0053140
FBgn0265637	FBgn0033215,FBgn0033187,FBgn0033205,FBgn0042135,FBgn0033192,FBgn0004132,FBgn0264294,FBgn0050495,FBgn0050499,FBgn0050491,FBgn0033190,FBgn0033206,FBgn0033212,FBgn0050496,FBgn0050493,FBgn0033210,FBgn0085245,FBgn0033207,FBgn0033214,FBgn0004133,FBgn0033209,FBgn0028687,FBgn0033216,FBgn0033204,FBgn0033208,FBgn0033203,FBgn0022772,FBgn0261385,FBgn0033195,FBgn0033188,FBgn0263046,FBgn0003733,FBgn0033196,FBg…
FBgn0265638	FBgn0033275,FBgn0033277,FBgn0010109,FBgn0050376,FBgn0011659,FBgn0050373,FBgn0261588,Novel000053,FBgn0263593,FBgn0033271,FBgn0265632,FBgn0033272,FBgn0021995,FBgn0033274,FBgn0033273,FBgn0033280,FBgn0033278,FBgn0033279,FBgn0050369,FBgn0053087,FBgn0085246,FBgn0050375,FBgn0050371,FBgn0010504,FBgn0013726
FBgn0265639	FBgn0053087,FBgn0050369,FBgn0085246,FBgn0050375,FBgn0010504,FBgn0050371,FBgn0013726,FBgn0033280,FBgn0033278,FBgn0033279,FBgn0263593,FBgn0033271,FBgn0265632,FBgn0033272,FBgn0021995,FBgn0033273,FBgn0033274,FBgn0033275,FBgn0033277,FBgn0010109,FBgn0050376,FBgn0011659,FBgn0050373,FBgn0261588,Novel000053
FBgn0265640	FBgn0050375,FBgn0250827,FBgn0050371,FBgn0013726,FBgn0050369,FBgn0053087,FBgn0085246,FBgn0033286,FBgn0033278,FBgn0033287,FBgn0033279,FBgn0050365,FBgn0033280,FBgn0033283,FBgn0050363,FBgn0265632,FBgn0261588,FBgn0033289,FBgn0050362,FBgn0033277,FBgn0033275,FBgn0033285,FBgn0050366,FBgn0050376,FBgn0010109,FBgn0050364
FBgn0265641	FBgn0033283,FBgn0050365,FBgn0033280,FBgn0033279,FBgn0033286,FBgn0033278,FBgn0033287,FBgn0085246,FBgn0053087,FBgn0050369,FBgn0250827,FBgn0050371,FBgn0013726,FBgn0050375,FBgn0050376,FBgn0050364,FBgn0010109,FBgn0033277,FBgn0033285,FBgn0050366,FBgn0261588,FBgn0050362,FBgn0033289,FBgn0265632,FBgn0050363
FBgn0265642	FBgn0265632,FBgn0050363,FBgn0010109,FBgn0050364,FBgn0050376,FBgn0033285,FBgn0050366,FBgn0033277,FBgn0050362,FBgn0033289,FBgn0261588,FBgn0085246,FBgn0050369,FBgn0053087,FBgn0013726,FBgn0050371,FBgn0250827,FBgn0050375,FBgn0033283,FBgn0050365,FBgn0033280,FBgn0033279,FBgn0033287,FBgn0033278,FBgn0033286
FBgn0265643	FBgn0085246,FBgn0053087,FBgn0050369,FBgn0013726,FBgn0050371,FBgn0250827,FBgn0050375,FBgn0033283,FBgn0033280,FBgn0050365,FBgn0033279,FBgn0033287,FBgn0033286,FBgn0033278,FBgn0265632,FBgn0050363,FBgn0010109,FBgn0050364,FBgn0050376,FBgn0050366,FBgn0033285,FBgn0033277,FBgn0033289,FBgn0050362,FBgn0261588
FBgn0265644	FBgn0033397,FBgn0033381,FBgn0020621,FBgn0010114,FBgn0050344,FBgn0262515,FBgn0033401,FBgn0033391,FBgn0033387,FBgn0033403,FBgn0015037,FBgn0002567,FBgn0003612,FBgn0265313,FBgn0086656,FBgn0033400,FBgn0033392,FBgn0033402,FBgn0260972,FBgn0033388,FBgn0028955,FBgn0028408,FBgn0015561,FBgn0033389,FBgn0033382,FBgn0015477,FBgn0050343,FBgn0033380,FBgn0050345,FBgn0033405,FBgn0027561,FBgn0266486,FBgn0259728,FBg…
FBgn0265645	FBgn0033543,FBgn0024836,FBgn0033538,FBgn0033541,FBgn0033539,Novel000090,FBgn0005586,FBgn0024956,FBgn0033542,FBgn0033540,FBgn0053144,FBgn0033544,FBgn0263102
FBgn0265646	Novel000091,FBgn0026619,FBgn0028963,FBgn0025692,FBgn0250842,FBgn0033781,FBgn0261545,FBgn0033783,FBgn0033773,FBgn0086904,FBgn0026741,FBgn0033782,FBgn0050487,FBgn0020930,FBgn0040755,FBgn0050488,FBgn0033784,FBgn0010488,Novel000065,FBgn0050486,FBgn0002069,FBgn0033774,FBgn0033785,FBgn0013305,FBgn0003326,FBgn0033775,FBgn0011227,Novel000066,FBgn0000181,FBgn0033777,FBgn0003975,FBgn0033778
FBgn0265648	FBgn0034821,FBgn0003900,FBgn0041236,FBgn0263707,FBgn0261705,FBgn0261363,FBgn0045482,FBgn0021979,FBgn0261614,FBgn0045483,FBgn0034834,FBgn0034827,FBgn0034825,FBgn0034816,FBgn0003062,FBgn0050192,FBgn0010622,FBgn0034819,FBgn0034833,FBgn0034817,FBgn0034826,FBgn0034820,FBgn0265188,FBgn0085400,FBgn0034822,FBgn0262843,FBgn0265187,FBgn0034828,FBgn0034814,FBgn0041235,FBgn0034829,FBgn0034824
FBgn0265649	FBgn0034825,FBgn0034827,FBgn0034834,FBgn0045483,FBgn0261614,FBgn0021979,FBgn0045482,FBgn0263707,FBgn0261705,FBgn0261363,FBgn0034821,FBgn0041236,FBgn0003900,FBgn0041235,FBgn0034829,FBgn0034824,FBgn0034828,FBgn0265187,FBgn0262843,FBgn0034822,FBgn0034814,FBgn0034820,FBgn0265188,FBgn0085400,FBgn0034826,FBgn0034833,FBgn0034817,FBgn0034819,FBgn0050192,FBgn0010622,FBgn0034816,FBgn0003062
FBgn0265650	FBgn0033994,FBgn0033989,FBgn0013467,FBgn0053467,FBgn0033990,FBgn0262954,FBgn0033993,FBgn0043530,FBgn0262478,FBgn0029082,FBgn0262547,FBgn0015371
FBgn0265651	FBgn0034021,FBgn0014865,FBgn0034009,FBgn0034010,FBgn0013750,FBgn0026370,FBgn0265194,FBgn0000996,FBgn0034007,FBgn0011660,FBgn0034011,FBgn0034013,FBgn0263980,FBgn0004698,FBgn0050472,FBgn0085217,FBgn0034012,FBgn0034008
FBgn0265652	FBgn0034021,FBgn0013750,FBgn0034010,FBgn0034009,FBgn0014865,FBgn0011660,FBgn0034011,FBgn0034007,FBgn0000996,FBgn0026370,FBgn0265194,FBgn0034008,FBgn0085217,FBgn0034012,FBgn0050472,FBgn0263980,FBgn0004698,FBgn0034013
FBgn0265653	FBgn0050447,FBgn0034477,FBgn0265762,FBgn0261580,FBgn0043532,FBgn0034475,FBgn0262824,FBgn0034478,FBgn0034474,FBgn0034476,FBgn0265833,FBgn0261581,FBgn0265834,FBgn0034473
FBgn0265654	FBgn0053798,Novel000066,FBgn0004512,FBgn0033782,FBgn0265623,FBgn0033775,FBgn0013305,Novel000091,FBgn0028963,FBgn0250842,FBgn0025692,FBgn0033783,FBgn0033781,FBgn0050486,FBgn0033777,FBgn0002069,Novel000065,FBgn0265185,FBgn0005624,FBgn0033785,FBgn0033787,FBgn0265186,FBgn0003975,FBgn0033778,FBgn0050487,FBgn0040755,FBgn0033784,FBgn0050488,FBgn0000181,FBgn0010488
FBgn0265655	FBgn0267824,FBgn0033936,FBgn0033942,FBgn0050076,FBgn0024698,FBgn0013725,FBgn0264540,FBgn0261613,FBgn0033935,FBgn0033932,FBgn0050075,FBgn0010397,FBgn0033933,FBgn0050197,FBgn0033934,FBgn0261823,FBgn0265974
FBgn0265656	FBgn0050081,FBgn0013467,FBgn0259878,FBgn0003328,FBgn0034000,FBgn0033999,FBgn0264377,FBgn0034009,FBgn0033993,FBgn0033998,FBgn0034001,FBgn0015371,FBgn0259737,FBgn0001187,FBgn0265194,FBgn0033994,FBgn0034005,FBgn0034002,FBgn0034007,FBgn0259966,FBgn0262478,FBgn0004698,FBgn0033996,FBgn0262954,FBgn0033995,FBgn0034008
FBgn0265657	FBgn0085489,FBgn0085486,FBgn0040505,FBgn0053530,FBgn0034159,FBgn0040743,Novel000096,FBgn0034157,FBgn0034156,FBgn0013763,FBgn0034152,FBgn0024315,FBgn0034160,FBgn0015584,FBgn0259967,FBgn0085487,FBgn0085218,FBgn0050463,Novel000097,FBgn0034153,FBgn0085488,FBgn0034151,FBgn0010213,FBgn0024232,FBgn0267002,Novel000095,FBgn0259738,FBgn0020506,FBgn0011743,FBgn0034158,FBgn0053544,FBgn0024319,FBgn0034154
FBgn0265658	FBgn0025832,FBgn0011743,FBgn0014870,FBgn0034166,FBgn0034154,FBgn0004784,FBgn0028737,FBgn0034158,FBgn0025827,FBgn0053544,FBgn0010213,FBgn0034151,FBgn0085488,FBgn0259738,FBgn0026754,Novel000095,FBgn0267002,FBgn0025833,FBgn0259967,FBgn0015584,FBgn0085218,FBgn0034152,FBgn0025830,FBgn0046999,FBgn0034165,FBgn0034160,FBgn0034153,FBgn0050463,FBgn0034162,Novel000097,FBgn0053530,FBgn0085489,FBgn0026533,FBg…
FBgn0265659	FBgn0085488,FBgn0264330,FBgn0010213,FBgn0034151,FBgn0267002,FBgn0025833,FBgn0259738,FBgn0026754,Novel000095,FBgn0011743,FBgn0025832,FBgn0264329,FBgn0025827,FBgn0053544,FBgn0034158,FBgn0004784,FBgn0034154,FBgn0028737,FBgn0014870,FBgn0034166,FBgn0034168,FBgn0026533,FBgn0085489,FBgn0053530,FBgn0034159,FBgn0034157,FBgn0034156,Novel000096,FBgn0040743,FBgn0034165,FBgn0034160,FBgn0034152,FBgn0046999,FBg…
FBgn0265660	FBgn0026754,Novel000095,FBgn0259738,FBgn0025833,FBgn0267002,FBgn0010213,FBgn0085488,FBgn0264330,FBgn0085444,FBgn0028737,FBgn0004784,FBgn0034154,FBgn0034168,FBgn0034166,FBgn0014870,FBgn0053544,FBgn0025827,FBgn0034158,FBgn0025832,FBgn0264329,FBgn0011743,FBgn0034156,FBgn0034157,Novel000096,FBgn0040743,FBgn0034159,FBgn0085219,FBgn0053530,FBgn0026533,FBgn0085489,FBgn0034153,FBgn0003091,FBgn0034162,Nov…
FBgn0265661	FBgn0262481,FBgn0034390,FBgn0053998,FBgn0010551,FBgn0034406,FBgn0259682,FBgn0262569,FBgn0034403,FBgn0034396,FBgn0034392,FBgn0010053,FBgn0010651,FBgn0034391,FBgn0034381,FBgn0034402,FBgn0034380,FBgn0034394,FBgn0053147,FBgn0034405,FBgn0004240,FBgn0034399,FBgn0034383,FBgn0034401,FBgn0034407,FBgn0034408,FBgn0034382,FBgn0262103,FBgn0262480,FBgn0262479,FBgn0034400,FBgn0034387,FBgn0034389,FBgn0034397,Nov…
FBgn0265662	FBgn0029535,FBgn0264449,FBgn0025620,FBgn0040383,FBgn0086368,FBgn0015288,FBgn0025616,FBgn0027343,FBgn0029532,FBgn0040892,FBgn0260855,FBgn0040343,FBgn0021764,FBgn0026874,FBgn0040341,FBgn0029531,FBgn0025621,FBgn0040382,FBgn0015799
FBgn0265663	FBgn0024993,FBgn0040334,FBgn0024995,FBgn0001404,FBgn0000927,FBgn0011276,FBgn0040336,FBgn0011606,FBgn0024991,FBgn0024992,FBgn0028369,FBgn0024996,FBgn0000928,FBgn0011566,FBgn0024994,FBgn0250874,FBgn0040333,FBgn0025838,FBgn0024977,FBgn0000376,FBgn0040384,FBgn0024980,FBgn0267350,FBgn0000520,FBgn0024975,FBgn0040066,FBgn0040376,FBgn0003068,FBgn0040375,FBgn0000092,FBgn0004643,FBgn0024997,FBgn0029629,FBg…
FBgn0265664	FBgn0029771,FBgn0029769,FBgn0029762,FBgn0029768,FBgn0029765,FBgn0029761,FBgn0263512,FBgn0029763,FBgn0263987,FBgn0010014,FBgn0029770,FBgn0029766,FBgn0052762
FBgn0265665	FBgn0012051,FBgn0034454,FBgn0013325,FBgn0034456,FBgn0262170,FBgn0262571,FBgn0034452,FBgn0034457,FBgn0020440,FBgn0026378,FBgn0263391,FBgn0034446,FBgn0034447,FBgn0261456,FBgn0003435,FBgn0040273,FBgn0040732,FBgn0002716,FBgn0003887,FBgn0034458,FBgn0034451,FBgn0266711,FBgn0034455,FBgn0260934,FBgn0034459
FBgn0265666	FBgn0034463,FBgn0034457,FBgn0034468,FBgn0046879,FBgn0034461,FBgn0262571,FBgn0262966,FBgn0046880,FBgn0040729,FBgn0034460,FBgn0262170,FBgn0034456,FBgn0034462,FBgn0034459,FBgn0040730,FBgn0034458,FBgn0034455,FBgn0015949,FBgn0034464,FBgn0261807,FBgn0034470,FBgn0034467,FBgn0003435,FBgn0085227,FBgn0028372
FBgn0265667	FBgn0028372,FBgn0085227,FBgn0003435,FBgn0034470,FBgn0034467,FBgn0261807,FBgn0034464,FBgn0015949,FBgn0034458,FBgn0040730,FBgn0034459,FBgn0034462,FBgn0034460,FBgn0040729,FBgn0034456,FBgn0262170,FBgn0262966,FBgn0046880,FBgn0262571,FBgn0034461,FBgn0046879,FBgn0034457,FBgn0034468,FBgn0034463
FBgn0265671	FBgn0032668,FBgn0041184,FBgn0032671,FBgn0243486,FBgn0000120,FBgn0032663,FBgn0051785,FBgn0032665,FBgn0261804,FBgn0032669,FBgn0265669,FBgn0001301,FBgn0051802,FBgn0032670,FBgn0267486,FBgn0051741,FBgn0032664,FBgn0002939,FBgn0032666
FBgn0265672	FBgn0265670,FBgn0015400,FBgn0032369,FBgn0259960,FBgn0259962,FBgn0267327,FBgn0032373,FBgn0032370,FBgn0032371,FBgn0032368,FBgn0032372,FBgn0259961,FBgn0262786,FBgn0028412
FBgn0265673	FBgn0265670,FBgn0015400,FBgn0032369,FBgn0259960,FBgn0032373,FBgn0259962,FBgn0267327,FBgn0032371,FBgn0032370,FBgn0032368,FBgn0032372,FBgn0259961,FBgn0262786,FBgn0028412
FBgn0265674	FBgn0259960,FBgn0032369,FBgn0015400,FBgn0265670,FBgn0028412,FBgn0259961,FBgn0262786,FBgn0032372,FBgn0032368,FBgn0032373,FBgn0259962,FBgn0032370,FBgn0267327,FBgn0032371
FBgn0265675	FBgn0032089,FBgn0032101,FBgn0032087,FBgn0041092,FBgn0032100,FBgn0032095,FBgn0052982,FBgn0032090,FBgn0051609,FBgn0032096,FBgn0032088,FBgn0032094,FBgn0015316,FBgn0051708
FBgn0265676	FBgn0015316,FBgn0032096,FBgn0032086,FBgn0032085,FBgn0040964,FBgn0013746,FBgn0032090,FBgn0052982,FBgn0032095,FBgn0032083,FBgn0032089,FBgn0032101,FBgn0032087,FBgn0032094,FBgn0051708,FBgn0032084,FBgn0032088,FBgn0051609,FBgn0040963,FBgn0032100,FBgn0041092,FBgn0011705
FBgn0265677	FBgn0020445,FBgn0053282,FBgn0031518,FBgn0051698,FBgn0031523,FBgn0053281,FBgn0031516,FBgn0085422,FBgn0031522,FBgn0031526,FBgn0031517,FBgn0031513,FBgn0031520,FBgn0085423,FBgn0031512,FBgn0014906,FBgn0031515,FBgn0264744,FBgn0031514,FBgn0031519
FBgn0265678	FBgn0259950,FBgn0053282,FBgn0020445,FBgn0031518,FBgn0031523,FBgn0053281,FBgn0085422,FBgn0031516,FBgn0031522,FBgn0031526,FBgn0031528,FBgn0031529,FBgn0031520,FBgn0031513,FBgn0031517,FBgn0085423,FBgn0016698,FBgn0259949,FBgn0031515,FBgn0031514,FBgn0031519
FBgn0265679	FBgn0032683,FBgn0085200,FBgn0000636,FBgn0011559,FBgn0086707,FBgn0032682,FBgn0032679,FBgn0261597,FBgn0032681,FBgn0263086,FBgn0032680
FBgn0265680	FBgn0085200,FBgn0032683,FBgn0086707,FBgn0011559,FBgn0000636,FBgn0032679,FBgn0032682,FBgn0261597,FBgn0032681,FBgn0263086,FBgn0032680
FBgn0265681	FBgn0032681,FBgn0261597,FBgn0032685,FBgn0032680,FBgn0032684,FBgn0085200,FBgn0085370,FBgn0032683,FBgn0011559,FBgn0086707,FBgn0000636,FBgn0032679,FBgn0032682
FBgn0265682	FBgn0263086,FBgn0051787,FBgn0263094,FBgn0051788,FBgn0261804,FBgn0085200,FBgn0000636,FBgn0011559,FBgn0032677,FBgn0261057
FBgn0265683	FBgn0051870,FBgn0069354,FBgn0260453,FBgn0010612,FBgn0000018,FBgn0004872,FBgn0032318,FBgn0032322,FBgn0032311,FBgn0260454,Novel000033,FBgn0262599,FBgn0032305,FBgn0041781,FBgn0032314,FBgn0032304,FBgn0032313,FBgn0032321,FBgn0032315,FBgn0024227,FBgn0027453,FBgn0032312,FBgn0053129,FBgn0261871,FBgn0011676,FBgn0004363,FBgn0027363,FBgn0051869,FBgn0032303
FBgn0265684	FBgn0260453,FBgn0010612,FBgn0000018,FBgn0026147,FBgn0069354,FBgn0032311,FBgn0032322,FBgn0260454,FBgn0026148,FBgn0004872,FBgn0032318,Novel000033,FBgn0032314,FBgn0032304,FBgn0032313,FBgn0032321,FBgn0262599,FBgn0041781,FBgn0032305,FBgn0053129,FBgn0032312,FBgn0024227,FBgn0032315,FBgn0027453,FBgn0261871,FBgn0032303,FBgn0051869,FBgn0011676,FBgn0027363,FBgn0004363
FBgn0265685	FBgn0004363,FBgn0261871,FBgn0040967,FBgn0032315,FBgn0024227,FBgn0262599,FBgn0250837,FBgn0032314,Novel000033,FBgn0004872,FBgn0026148,FBgn0000146,FBgn0032322,FBgn0032311,FBgn0026147,FBgn0069354,FBgn0260453,FBgn0027363,FBgn0032329,FBgn0027453,FBgn0053129,FBgn0032312,FBgn0032330,FBgn0041781,FBgn0032305,FBgn0032313,FBgn0032321,FBgn0040096,FBgn0015756,FBgn0032318,FBgn0260454,FBgn0021761,FBgn0032331,FBg…
FBgn0265686	FBgn0260453,FBgn0069354,FBgn0026147,Novel000033,FBgn0032311,FBgn0032322,FBgn0004872,FBgn0026148,FBgn0000146,FBgn0040967,FBgn0032315,FBgn0024227,FBgn0032314,FBgn0250837,FBgn0262599,FBgn0004363,FBgn0261871,FBgn0000018,FBgn0010612,FBgn0032331,FBgn0023415,FBgn0260454,FBgn0021761,FBgn0040096,FBgn0015756,FBgn0032318,FBgn0053129,FBgn0032312,FBgn0027453,FBgn0032313,FBgn0032321,FBgn0032330,FBgn0041781,FBg…
FBgn0265687	FBgn0003313,FBgn0032363,FBgn0032362,FBgn0032366,FBgn0032368,FBgn0267327,FBgn0085191,FBgn0032361,FBgn0032365,FBgn0263087,FBgn0051706,FBgn0028412,FBgn0262683,FBgn0263386,FBgn0028490,FBgn0032369,FBgn0015400,FBgn0032364
FBgn0265688	FBgn0032364,FBgn0015400,FBgn0032369,FBgn0028490,FBgn0262786,FBgn0263386,FBgn0028412,FBgn0262683,FBgn0032365,FBgn0032361,FBgn0263087,FBgn0085191,FBgn0051706,FBgn0003313,FBgn0032366,FBgn0032362,FBgn0032363,FBgn0032370,FBgn0032371,FBgn0267327,FBgn0032368
FBgn0265689	FBgn0032365,FBgn0032361,FBgn0085191,FBgn0051706,FBgn0032363,FBgn0032362,FBgn0032366,FBgn0032371,FBgn0032370,FBgn0267327,FBgn0032368,FBgn0265670,FBgn0015400,FBgn0032364,FBgn0032369,FBgn0028490,FBgn0263386,FBgn0262786,FBgn0262683,FBgn0028412
FBgn0265690	FBgn0032368,FBgn0267327,FBgn0259962,FBgn0032373,FBgn0032371,FBgn0032370,FBgn0028412,FBgn0259961,FBgn0262786,FBgn0032372,FBgn0032369,FBgn0015400,FBgn0265670,FBgn0259960
FBgn0265691	FBgn0029837,FBgn0029821,FBgn0029831,FBgn0029839,FBgn0005390,FBgn0262575,FBgn0029826,FBgn0029824,FBgn0027546,FBgn0052755,FBgn0029827,FBgn0029823,FBgn0029828,FBgn0003302,FBgn0052756,FBgn0026060,FBgn0029834,FBgn0029830,FBgn0029836,FBgn0029840,FBgn0029838,FBgn0029833,FBgn0029822,FBgn0264386,FBgn0029825,FBgn0029003,FBgn0029835,FBgn0029843,FBgn0000042
FBgn0265692	FBgn0029835,FBgn0029843,FBgn0029838,FBgn0029833,FBgn0264386,FBgn0029825,FBgn0029003,FBgn0029840,FBgn0029834,FBgn0029830,FBgn0029836,FBgn0029828,FBgn0029823,FBgn0052756,FBgn0003302,FBgn0026060,FBgn0029827,FBgn0029826,FBgn0262575,FBgn0027546,FBgn0029824,FBgn0052755,FBgn0029837,FBgn0029831,FBgn0005390,FBgn0029839
FBgn0265693	FBgn0262827,FBgn0052726,FBgn0029950,FBgn0029949,FBgn0029948,FBgn0029941,FBgn0052720,FBgn0085366,FBgn0040922,FBgn0040923,FBgn0261616,FBgn0261615,FBgn0261849,FBgn0262612,FBgn0052719,FBgn0259098,FBgn0265265
FBgn0265694	FBgn0029952,FBgn0052720,FBgn0029951,FBgn0052719,FBgn0262612,FBgn0004198
FBgn0265695	FBgn0262612,FBgn0052719,FBgn0004198,FBgn0052720,FBgn0029951,FBgn0029952
FBgn0265696	FBgn0034459,FBgn0034462,FBgn0034472,FBgn0040730,FBgn0015949,FBgn0034464,FBgn0034467,FBgn0034470,FBgn0261807,FBgn0003435,FBgn0085227,FBgn0028372,FBgn0034471,FBgn0034463,FBgn0043533,FBgn0046879,FBgn0034461,FBgn0034468,FBgn0262571,FBgn0262966,FBgn0046880,FBgn0040729,FBgn0262170,FBgn0034460
FBgn0265697	FBgn0034464,FBgn0015949,FBgn0040730,FBgn0034459,FBgn0034462,FBgn0034472,FBgn0028372,FBgn0085227,FBgn0003435,FBgn0034467,FBgn0034470,FBgn0261807,FBgn0034461,FBgn0046879,FBgn0034468,FBgn0043533,FBgn0034471,FBgn0034463,FBgn0034460,FBgn0040729,FBgn0262170,FBgn0046880,FBgn0262966
FBgn0265698	FBgn0262966,FBgn0046880,FBgn0034460,FBgn0040729,FBgn0262170,FBgn0034463,FBgn0034471,FBgn0034468,FBgn0034461,FBgn0046879,FBgn0043533,FBgn0003435,FBgn0034474,FBgn0261807,FBgn0034467,FBgn0034470,FBgn0034473,FBgn0028372,FBgn0085227,FBgn0040730,FBgn0034472,FBgn0034459,FBgn0034462,FBgn0034464,FBgn0015949
FBgn0265699	FBgn0046879,FBgn0034461,FBgn0034468,FBgn0043533,FBgn0034471,FBgn0034463,FBgn0034460,FBgn0040729,FBgn0046880,FBgn0262966,FBgn0034464,FBgn0015949,FBgn0040730,FBgn0034462,FBgn0034459,FBgn0034472,FBgn0028372,FBgn0034473,FBgn0085227,FBgn0003435,FBgn0034470,FBgn0034467,FBgn0034474,FBgn0261807
FBgn0265700	FBgn0041629,FBgn0030060,FBgn0004102,FBgn0026411,FBgn0030063,FBgn0030061,FBgn0030056,FBgn0027330,FBgn0030058,FBgn0027864,FBgn0030055,FBgn0030057
FBgn0265701	FBgn0027330,FBgn0030058,FBgn0030055,FBgn0027864,FBgn0030061,FBgn0030056,FBgn0030057,FBgn0041629,FBgn0030060,FBgn0026411,FBgn0004102,FBgn0030063
FBgn0265703	FBgn0035099,FBgn0040688,FBgn0002564,FBgn0020386,FBgn0035101,FBgn0035097,FBgn0263988,FBgn0052475,FBgn0262679
FBgn0265704	FBgn0262679,FBgn0052475,FBgn0263988,FBgn0035097,FBgn0035101,FBgn0020386,FBgn0002564,FBgn0040688,FBgn0035099
FBgn0265705	FBgn0031059,FBgn0031030,FBgn0031043,FBgn0031060,FBgn0031047,FBgn0031068,FBgn0040089,FBgn0004057,FBgn0031041,FBgn0031064,FBgn0010380,FBgn0031070,FBgn0052528,FBgn0027358,FBgn0031057,FBgn0031054,FBgn0031040,FBgn0031062,FBgn0031034,FBgn0031033,FBgn0031053,FBgn0031042,FBgn0031048,FBgn0031050,FBgn0010341,FBgn0031037,FBgn0259789,FBgn0066304,FBgn0031049,FBgn0087008,FBgn0031045,FBgn0086384,FBgn0031069,FBg…
FBgn0265706	FBgn0035152,FBgn0025676,FBgn0035140,FBgn0035147,FBgn0035158,FBgn0085298,FBgn0052483,FBgn0035157,FBgn0035144,FBgn0001316,FBgn0016715,FBgn0035142,FBgn0260862,FBgn0035146,FBgn0263042,FBgn0035143,FBgn0035155,FBgn0035151,FBgn0035148,Novel000126,FBgn0035153,FBgn0035154,FBgn0035145,FBgn0035150,FBgn0035149,FBgn0035141
FBgn0265707	FBgn0035160,FBgn0035158,FBgn0052483,FBgn0035147,FBgn0035152,FBgn0025676,Novel000128,FBgn0263042,FBgn0260862,FBgn0035157,FBgn0016715,FBgn0035153,Novel000126,FBgn0035150,FBgn0035159,FBgn0035154,FBgn0035161,FBgn0035148,FBgn0035151,Novel000127,FBgn0035155,FBgn0000575,FBgn0035149
FBgn0265708	FBgn0035604,FBgn0004380,FBgn0260856,FBgn0016031,FBgn0035600,FBgn0052423,FBgn0035603,FBgn0085420,FBgn0035601
FBgn0265709	FBgn0004380,FBgn0035604,FBgn0260856,FBgn0052423,FBgn0035600,FBgn0016031,FBgn0035603,FBgn0035601,FBgn0085420
FBgn0265710	FBgn0030104,FBgn0052708,FBgn0030108,FBgn0030105,FBgn0030091,FBgn0265413,FBgn0030082,FBgn0030107,FBgn0030081,FBgn0030086,FBgn0030090,FBgn0260789,FBgn0040931,FBgn0030093,FBgn0030087,Novel000223,FBgn0030109,FBgn0014868,FBgn0086450,FBgn0030101,FBgn0004856,FBgn0030089,FBgn0265725,FBgn0030097,FBgn0004828,FBgn0086367,Novel000222,FBgn0030102,FBgn0030103,FBgn0026206,FBgn0030092,FBgn0052706,Novel000226,FBg…
FBgn0265711	FBgn0035612,FBgn0035608,FBgn0010894,FBgn0029118,FBgn0035617,FBgn0015766,FBgn0085371,FBgn0035611,FBgn0035619,FBgn0035621,FBgn0003486,FBgn0040239,FBgn0085420,FBgn0029121,FBgn0035610,FBgn0035620,FBgn0035607
FBgn0265712	FBgn0029118,FBgn0035617,FBgn0015766,FBgn0035611,FBgn0085371,FBgn0035619,FBgn0035612,FBgn0035608,FBgn0010894,FBgn0085420,FBgn0029121,FBgn0035622,FBgn0035610,FBgn0035620,FBgn0035607,FBgn0035621,FBgn0003486,FBgn0040239
FBgn0265713	FBgn0035607,FBgn0035619,FBgn0035610,FBgn0035611,FBgn0085371,FBgn0015766,FBgn0029118,FBgn0085420,FBgn0029121,FBgn0035617,FBgn0040239,FBgn0003486,FBgn0010894,FBgn0035612,FBgn0035608
FBgn0265715	FBgn0261631,FBgn0001258,FBgn0035688,FBgn0024921,FBgn0041623,FBgn0047334,FBgn0035696,FBgn0035699,FBgn0035695,FBgn0022699,FBgn0035687,FBgn0035691,FBgn0035692,FBgn0004513,FBgn0022935,FBgn0035690,FBgn0262787,FBgn0035693,FBgn0041624,FBgn0002526,FBgn0035697,FBgn0035694,FBgn0041625,FBgn0035689,FBgn0262985,FBgn0047000,FBgn0259969
FBgn0265716	FBgn0035714,FBgn0041232,FBgn0086680,FBgn0035713,FBgn0035711,FBgn0005626,FBgn0052392,FBgn0035709,FBgn0004619,FBgn0261934,FBgn0035710,FBgn0035715
FBgn0265717	FBgn0264502,FBgn0263705,FBgn0030240,FBgn0030243,FBgn0017561,FBgn0052670,FBgn0030241,FBgn0030237,FBgn0262735,FBgn0030251,FBgn0052671,FBgn0040850,FBgn0003965,FBgn0030246,FBgn0030247,FBgn0030242,FBgn0021742,FBgn0003321,FBgn0030239,FBgn0030244,FBgn0030245,FBgn0259241,FBgn0052669
FBgn0265718	FBgn0015033,FBgn0035770,FBgn0015298,FBgn0014011,FBgn0035777,FBgn0264303,FBgn0035769,FBgn0259935,FBgn0035789,FBgn0052383,FBgn0264302,FBgn0035791,FBgn0035760,FBgn0035780,FBgn0035768,FBgn0035772,FBgn0035788,FBgn0019662,FBgn0035762,FBgn0035790,FBgn0053278,FBgn0261536,FBgn0082598,FBgn0035767,FBgn0035763,FBgn0035771,FBgn0262984,FBgn0261537,FBgn0259203,FBgn0035781,FBgn0035766,FBgn0035785,FBgn0052379,FBg…
FBgn0265719	FBgn0000356,FBgn0003149,FBgn0035922,FBgn0262508,FBgn0035914,FBgn0035923,FBgn0035915,FBgn0000355,FBgn0017430,FBgn0001168,FBgn0035916,FBgn0035918,FBgn0266084,FBgn0000121,FBgn0052351,FBgn0000357,FBgn0264696,FBgn0035924,FBgn0052029,FBgn0035926,FBgn0000358,FBgn0052022,FBgn0040828,FBgn0017579,FBgn0017429,FBgn0035921,FBgn0011509,FBgn0035917
FBgn0265720	FBgn0011509,FBgn0052024,FBgn0263930,FBgn0040828,FBgn0035928,FBgn0052026,FBgn0035933,FBgn0035924,FBgn0035926,FBgn0035929,FBgn0000358,FBgn0052022,FBgn0085456,FBgn0035931,FBgn0000357,FBgn0264696,FBgn0266084,FBgn0052023,FBgn0085455,FBgn0001168,FBgn0035932,FBgn0000355,FBgn0035923,FBgn0003149,FBgn0000356
FBgn0265721	FBgn0035570,FBgn0035582,FBgn0047330,FBgn0261797,FBgn0042131,FBgn0052237,FBgn0035575,FBgn0035572,FBgn0035577,FBgn0035574,FBgn0035581,FBgn0027085,FBgn0035578,FBgn0035583,FBgn0035571
FBgn0265722	FBgn0260985,FBgn0035497,FBgn0035522,FBgn0011653,FBgn0041171,FBgn0035501,FBgn0004574,FBgn0053764,FBgn0259986,FBgn0035515,FBgn0035520,FBgn0035505,FBgn0035495,FBgn0052260,FBgn0052259,FBgn0024179,FBgn0001257,FBgn0003710,FBgn0035498,FBgn0035504,FBgn0035511,FBgn0035517,FBgn0028664,FBgn0016013,FBgn0035510,FBgn0035512,FBgn0035518,FBgn0035521,FBgn0035499,FBgn0261274,FBgn0035496,FBgn0035508,FBgn0264693,FBg…
FBgn0265723	FBgn0262593,FBgn0263392,FBgn0035384,FBgn0035393,FBgn0035390,FBgn0052846,FBgn0035382,FBgn0035385,FBgn0035388,FBgn0035397,FBgn0052484,FBgn0035380,FBgn0035379,FBgn0035392,FBgn0052485,FBgn0052488,FBgn0266918,FBgn0054025,FBgn0004372,FBgn0035383,FBgn0052487,FBgn0040308
FBgn0265724	FBgn0035375,FBgn0054025,FBgn0035383,FBgn0052846,FBgn0035382,FBgn0262593,FBgn0035379,FBgn0035380,FBgn0263392
FBgn0265727	FBgn0261260,FBgn0028292,FBgn0085478,Novel000202,FBgn0040235,FBgn0030109,FBgn0040236,FBgn0052704,FBgn0085479,FBgn0052703,FBgn0260789,FBgn0002576,FBgn0030122,FBgn0030107,FBgn0030105,FBgn0260771,FBgn0030108,FBgn0030120,FBgn0030103,FBgn0030121,FBgn0000077,FBgn0010269,FBgn0030114,FBgn0086367,FBgn0030104,FBgn0040234,FBgn0026149
FBgn0265728	FBgn0259701,FBgn0259703,FBgn0265988,FBgn0261723,FBgn0262030,FBgn0035295,FBgn0035299,FBgn0035294,FBgn0035298,FBgn0027547,FBgn0085288,FBgn0035300,FBgn0259702,FBgn0035293,FBgn0035290,FBgn0086906,FBgn0002872
FBgn0265729	FBgn0265988,FBgn0259703,FBgn0035283,FBgn0259701,FBgn0035287,FBgn0042712,FBgn0035299,FBgn0035295,FBgn0262624,FBgn0262030,FBgn0261723,FBgn0035285,FBgn0002183,FBgn0035300,FBgn0000109,FBgn0085288,FBgn0027547,FBgn0035298,FBgn0035294,FBgn0086906,FBgn0004636,FBgn0002872,FBgn0035282,FBgn0035286,FBgn0035290,FBgn0035281,FBgn0035293,FBgn0259702
FBgn0265730	FBgn0035162,FBgn0035169,FBgn0000575,FBgn0035170,FBgn0035176,FBgn0035166,FBgn0035168,FBgn0054057,Novel000127,FBgn0035165,FBgn0035161,FBgn0054056,FBgn0260756,FBgn0035171,FBgn0028999,FBgn0052479,Novel000128,FBgn0035173,FBgn0264574,FBgn0035164,FBgn0035167,FBgn0260755,FBgn0035160
FBgn0265731	FBgn0000451,FBgn0036078,FBgn0036075,FBgn0036070,FBgn0052057,FBgn0052055,FBgn0036072,FBgn0036080,FBgn0011569,FBgn0052056,FBgn0040823
FBgn0265732	FBgn0052055,FBgn0036072,FBgn0036080,FBgn0011569,FBgn0052056,FBgn0000451,FBgn0036078,FBgn0036075,FBgn0036070,FBgn0052057
FBgn0265733	FBgn0036075,FBgn0000451,FBgn0036078,FBgn0052057,FBgn0036070,FBgn0036080,FBgn0036072,FBgn0052055,FBgn0011569,FBgn0052056
FBgn0265734	FBgn0036070,FBgn0052057,FBgn0000451,FBgn0036078,FBgn0036075,FBgn0011569,FBgn0052056,FBgn0052055,FBgn0036080,FBgn0036072
FBgn0265735	FBgn0052055,FBgn0036072,FBgn0036080,FBgn0011569,FBgn0052056,FBgn0040823,FBgn0000451,FBgn0036078,FBgn0036075,FBgn0036070,FBgn0052057
FBgn0265736	FBgn0011802,FBgn0036083,FBgn0052061,FBgn0052062,FBgn0052058,FBgn0052064,FBgn0045770,FBgn0036082
FBgn0265737	FBgn0036104,FBgn0036101,FBgn0036105,FBgn0036107,FBgn0036102,FBgn0010762,FBgn0036099,FBgn0047038,FBgn0262890,FBgn0262020,FBgn0036106,FBgn0027615,FBgn0053493,FBgn0026160
FBgn0265738	FBgn0036104,FBgn0036101,FBgn0036102,FBgn0036107,FBgn0036105,FBgn0026160,FBgn0036106,FBgn0262020,FBgn0053493,FBgn0027615,FBgn0262890,FBgn0010762,FBgn0036099,FBgn0047038
FBgn0265739	FBgn0036110,FBgn0262890,FBgn0036111,FBgn0027615,FBgn0036106,FBgn0036109,FBgn0262020,FBgn0026160,FBgn0036107,FBgn0036102,FBgn0036105,FBgn0036101,FBgn0036104,FBgn0036108
FBgn0265740	FBgn0052074,FBgn0052073,FBgn0013469,FBgn0083068,FBgn0052075,FBgn0036112,FBgn0036136,FBgn0036121,FBgn0261112,FBgn0266540,FBgn0036128,FBgn0260795,FBgn0010741,FBgn0052081,FBgn0054012,FBgn0029172,FBgn0003462,FBgn0036117,FBgn0036134,FBgn0036125,FBgn0020412,FBgn0036138,FBgn0014368,FBgn0036116,FBgn0052069,FBgn0052071,FBgn0036135,FBgn0052079,FBgn0263241,FBgn0036133,FBgn0036118,FBgn0025355,FBgn0036126,FBg…
FBgn0265741	FBgn0265469,FBgn0028667,FBgn0028668,FBgn0036165,FBgn0036156,FBgn0036160,FBgn0053272,FBgn0036168,FBgn0036158,FBgn0036161,FBgn0003377,FBgn0036170,FBgn0036162,FBgn0036169,FBgn0003378,FBgn0053500,FBgn0259481,FBgn0036159,FBgn0003373,FBgn0036157,FBgn0036155
FBgn0265742	FBgn0053272,FBgn0036168,FBgn0036160,FBgn0036156,FBgn0036165,FBgn0265469,FBgn0028668,FBgn0028667,FBgn0036155,FBgn0036157,FBgn0036159,FBgn0259481,FBgn0003373,FBgn0003378,FBgn0036169,FBgn0053500,FBgn0036158,FBgn0036161,FBgn0003377,FBgn0036170,FBgn0036162
FBgn0265743	FBgn0052100,FBgn0036273,FBgn0036282,FBgn0036277,FBgn0052104,FBgn0036272,FBgn0022709,FBgn0265455,FBgn0036279,FBgn0036271,FBgn0036266,FBgn0036278,FBgn0052105,FBgn0260941,FBgn0011279,FBgn0036274
FBgn0265744	FBgn0052103,FBgn0036282,FBgn0052100,FBgn0036273,FBgn0036279,FBgn0036271,FBgn0036277,FBgn0052104,FBgn0022709,FBgn0265455,FBgn0036272,FBgn0036278,FBgn0052105,FBgn0036266,FBgn0036274,FBgn0260941,FBgn0011279
FBgn0265745	FBgn0014343,FBgn0010235,FBgn0036306,Novel000104,FBgn0261933,FBgn0015904,FBgn0052109,FBgn0052113,FBgn0052112,FBgn0036305,FBgn0036302,FBgn0014007,FBgn0015919
FBgn0265746	FBgn0014007,FBgn0015919,FBgn0036302,FBgn0052113,FBgn0036305,FBgn0052112,FBgn0052109,FBgn0015904,FBgn0261933,FBgn0036306,Novel000104,FBgn0010235,FBgn0014343
FBgn0265747	FBgn0036336,FBgn0036346,FBgn0036342,FBgn0036330,FBgn0036331,FBgn0036337,FBgn0085457,FBgn0036345,FBgn0086916,FBgn0036333,FBgn0011284,FBgn0036332,FBgn0036335,FBgn0083978,FBgn0036334,FBgn0053262,FBgn0036341,FBgn0010452,FBgn0085458,FBgn0036343,FBgn0260441,FBgn0036340,FBgn0266709
FBgn0265748	FBgn0052119,FBgn0259970,FBgn0262623,FBgn0036349,FBgn0002573,FBgn0036351,FBgn0259971,FBgn0040813,FBgn0001256,FBgn0036350,FBgn0036352,FBgn0023095,FBgn0003034,FBgn0036348,FBgn0036354,FBgn0040814,FBgn0036353
FBgn0265749	FBgn0030297,FBgn0045502,FBgn0000618,Novel000203,FBgn0030309,FBgn0030304,FBgn0001145,FBgn0030306,FBgn0030311,FBgn0027259,FBgn0030316,FBgn0030313,FBgn0030314,FBgn0030301,FBgn0030307,FBgn0030296,Novel000204,FBgn0030310,FBgn0030300,FBgn0052666,FBgn0003277,FBgn0262740,FBgn0030317,FBgn0262685,FBgn0030298,FBgn0001624,FBgn0030305,FBgn0002948
FBgn0265750	FBgn0262623,FBgn0052119,FBgn0259970,FBgn0002573,FBgn0036349,FBgn0036351,FBgn0036350,FBgn0259971,FBgn0040813,FBgn0001256,FBgn0036348,FBgn0003034,FBgn0023095,FBgn0036352,FBgn0036354,FBgn0040814,FBgn0036353
FBgn0265751	FBgn0053263,FBgn0052121,FBgn0036356,FBgn0036353,FBgn0040814,FBgn0036354,FBgn0003034,FBgn0023095,FBgn0036348,FBgn0036352,FBgn0036350,FBgn0259971,FBgn0001256,FBgn0040813,FBgn0036351,FBgn0002573,FBgn0036349,FBgn0259970,FBgn0052119,FBgn0262623,FBgn0260049,FBgn0260459
FBgn0265752	FBgn0036351,FBgn0036350,FBgn0036363,FBgn0040813,FBgn0001256,FBgn0259971,FBgn0023095,FBgn0003034,FBgn0036348,FBgn0036352,FBgn0036365,FBgn0260049,FBgn0260459,FBgn0262623,FBgn0036359,FBgn0052119,FBgn0259970,FBgn0002573,FBgn0036349,FBgn0036356,FBgn0036360,FBgn0052121,FBgn0053263,FBgn0036361,FBgn0036362,FBgn0036354,FBgn0040814,FBgn0036364,FBgn0036353
FBgn0265753	FBgn0036416,FBgn0036414,FBgn0085273,FBgn0036415,FBgn0000411,FBgn0001085,FBgn0036417,FBgn0013718,FBgn0052141,FBgn0036419
FBgn0265754	FBgn0000411,FBgn0036415,FBgn0036416,FBgn0036414,FBgn0085273,FBgn0036419,FBgn0052141,FBgn0036417,FBgn0013718,FBgn0001085
FBgn0265755	FBgn0036488,FBgn0014002,FBgn0036481,FBgn0052847,FBgn0036482,FBgn0266441,FBgn0036485,FBgn0036484,FBgn0036483,FBgn0086690,FBgn0036489,FBgn0029114,FBgn0036479,FBgn0266452,FBgn0036487,FBgn0027088,FBgn0036480,FBgn0036476,FBgn0036490,FBgn0047178,FBgn0036486
FBgn0265756	FBgn0036712,Novel000106,FBgn0036723,FBgn0053052,FBgn0036709,FBgn0036703,FBgn0036713,FBgn0015550,FBgn0036706,FBgn0036702,FBgn0036708,FBgn0026197,FBgn0052176,FBgn0260943,FBgn0036717,FBgn0027660,FBgn0036714,FBgn0040793,FBgn0036715,FBgn0036711,FBgn0036704,FBgn0042641,FBgn0036710,FBgn0036716,FBgn0052174,FBgn0036705,FBgn0036707,FBgn0053051,FBgn0266669
FBgn0265757	FBgn0053052,FBgn0036723,Novel000106,FBgn0036712,FBgn0027660,FBgn0036717,FBgn0036714,FBgn0040793,FBgn0036702,FBgn0036708,FBgn0052176,FBgn0260943,FBgn0026197,FBgn0036706,FBgn0015550,FBgn0036709,FBgn0036713,FBgn0036703,FBgn0042641,FBgn0036710,FBgn0036704,FBgn0036711,FBgn0036715,FBgn0053051,FBgn0266669,FBgn0036707,FBgn0052174,FBgn0036705,FBgn0036716
FBgn0265758	FBgn0026197,FBgn0036726,FBgn0040793,FBgn0036733,FBgn0036738,FBgn0015550,FBgn0036725,FBgn0036729,FBgn0053052,FBgn0036728,FBgn0036731,FBgn0053051,FBgn0266669,FBgn0259174,FBgn0036732,FBgn0052174,FBgn0025455,FBgn0052176,FBgn0027660,FBgn0036717,FBgn0023197,FBgn0036730,FBgn0036735,FBgn0036734,FBgn0036723,FBgn0036716,FBgn0052185,FBgn0085279,FBgn0036727,FBgn0000567,FBgn0042641,FBgn0036715
FBgn0265759	FBgn0036747,FBgn0036746,FBgn0261294,FBgn0052177,FBgn0036740,FBgn0052179,FBgn0262531,FBgn0036738,FBgn0023197,FBgn0085280,FBgn0036742,FBgn0000567,FBgn0004401,FBgn0036745,FBgn0025455,FBgn0259174,FBgn0036741,FBgn0052183
FBgn0265760	FBgn0023197,FBgn0036742,FBgn0085280,FBgn0036738,FBgn0262531,FBgn0052179,FBgn0052177,FBgn0036747,FBgn0261294,FBgn0036746,FBgn0036740,FBgn0259174,FBgn0052183,FBgn0036741,FBgn0036745,FBgn0025455,FBgn0000567,FBgn0004401
FBgn0265761	FBgn0041203,FBgn0030412,FBgn0030410,FBgn0052654,FBgn0030406,FBgn0030408,FBgn0015024,FBgn0011837,FBgn0030409,FBgn0030411,FBgn0265523,FBgn0030398,FBgn0264542,FBgn0030400,FBgn0030407,FBgn0030417,FBgn0030403
FBgn0265763	FBgn0265833,FBgn0034476,FBgn0034478,FBgn0034474,FBgn0265834,FBgn0034473,FBgn0261581,FBgn0034477,FBgn0265762,FBgn0050447,FBgn0262824,FBgn0034475,FBgn0261580,FBgn0043532
FBgn0265764	FBgn0034476,FBgn0265833,FBgn0034478,FBgn0034474,FBgn0265834,FBgn0034473,FBgn0261581,FBgn0034477,FBgn0265762,FBgn0050447,FBgn0262824,FBgn0034475,FBgn0043532,FBgn0261580
FBgn0265765	FBgn0265834,FBgn0261581,FBgn0034479,FBgn0265833,FBgn0034476,FBgn0034478,Novel000069,FBgn0262824,FBgn0034475,FBgn0043532,FBgn0261580,FBgn0034477,FBgn0265762,FBgn0050447
FBgn0265766	FBgn0265834,FBgn0034479,FBgn0261581,FBgn0034476,FBgn0265833,Novel000069,FBgn0034478,FBgn0034475,FBgn0262824,FBgn0043532,FBgn0261580,FBgn0265762,FBgn0034477,FBgn0034480,FBgn0050447
FBgn0265786	FBgn0031745,FBgn0031739,FBgn0054011,FBgn0031732,FBgn0085410,FBgn0262814,FBgn0031736,FBgn0031731,FBgn0002856,FBgn0031737,FBgn0031738,FBgn0002855,FBgn0265785,FBgn0031730,FBgn0031734,FBgn0031740,FBgn0051913,FBgn0262999,FBgn0031746,FBgn0259959,FBgn0031741,FBgn0031733,FBgn0031735,FBgn0031749,FBgn0043362,FBgn0051644,FBgn0024191,FBgn0031747
FBgn0265787	FBgn0031745,FBgn0031732,FBgn0054011,FBgn0031739,FBgn0031738,FBgn0002855,FBgn0265785,FBgn0031731,FBgn0031736,FBgn0262814,FBgn0085410,FBgn0031737,FBgn0002856,FBgn0262999,FBgn0031740,FBgn0051913,FBgn0031746,FBgn0031730,FBgn0031734,FBgn0051644,FBgn0043362,FBgn0031747,FBgn0024191,FBgn0031735,FBgn0031733,FBgn0259959,FBgn0031741,FBgn0031749
FBgn0265788	FBgn0085410,FBgn0031738,FBgn0086266,FBgn0031739,FBgn0001941,FBgn0001128,FBgn0031758,FBgn0086265,FBgn0261055,FBgn0003979,FBgn0259959,FBgn0000308,FBgn0043362,FBgn0040949,FBgn0051644,FBgn0001942,FBgn0015381,FBgn0031740,FBgn0031757,FBgn0002856,FBgn0262814,FBgn0265785,FBgn0002855,FBgn0031756,FBgn0031745,FBgn0003980,FBgn0031749,FBgn0031741,FBgn0031747,FBgn0031751,FBgn0031752,FBgn0031753,FBgn0031746,FBg…
FBgn0265789	FBgn0031745,FBgn0031756,FBgn0003980,FBgn0002856,FBgn0262814,FBgn0265785,FBgn0002855,FBgn0031753,FBgn0031746,FBgn0262999,FBgn0031749,FBgn0031741,FBgn0031751,FBgn0031747,FBgn0031752,FBgn0031739,FBgn0001941,FBgn0001128,FBgn0031758,FBgn0086265,FBgn0261055,FBgn0003979,FBgn0085410,FBgn0031738,FBgn0086266,FBgn0001942,FBgn0015381,FBgn0031757,FBgn0031740,FBgn0259959,FBgn0000308,FBgn0043362,FBgn0051644,FBg…
FBgn0265790	FBgn0002855,FBgn0265785,FBgn0262814,FBgn0002856,FBgn0003980,FBgn0031756,FBgn0031745,FBgn0031752,FBgn0031751,FBgn0031747,FBgn0031741,FBgn0031749,FBgn0262999,FBgn0031746,FBgn0031753,FBgn0031738,FBgn0086266,FBgn0031760,FBgn0085410,FBgn0003979,FBgn0261055,FBgn0086265,FBgn0001128,FBgn0031758,FBgn0001941,FBgn0031739,FBgn0040949,FBgn0051644,FBgn0043362,FBgn0000308,FBgn0031759,FBgn0259959,FBgn0031757,FBg…
FBgn0265791	FBgn0032268,FBgn0024740,FBgn0051872,FBgn0027868,FBgn0051871,FBgn0265264,FBgn0032282,FBgn0032293,FBgn0032280,FBgn0032276,FBgn0032269,FBgn0032295,FBgn0267254,FBgn0032297,FBgn0032287,FBgn0250826,FBgn0032284,FBgn0051721,FBgn0032289,FBgn0023496,FBgn0085190,FBgn0032285,FBgn0032281,FBgn0043825,FBgn0032294,FBgn0032292,FBgn0040496,FBgn0032271,FBgn0032286,FBgn0032291,FBgn0032296,FBgn0032290,FBgn0032283
FBgn0265792	FBgn0027550,FBgn0260454,FBgn0024740,FBgn0027868,FBgn0051870,FBgn0032293,FBgn0032303,FBgn0051869,FBgn0027363,FBgn0011676,FBgn0032312,FBgn0027453,FBgn0032313,FBgn0032295,FBgn0032304,FBgn0032305,FBgn0032297,Novel000033,FBgn0032287,FBgn0032311,FBgn0260453,FBgn0032289,FBgn0069354,FBgn0004363,FBgn0032294,FBgn0015320,FBgn0032292,FBgn0024227,FBgn0032291,FBgn0032290,FBgn0032296,FBgn0032299,FBgn0032298,FBg…
FBgn0265793	FBgn0027453,FBgn0032304,FBgn0032295,FBgn0032305,FBgn0051869,FBgn0032303,FBgn0027363,FBgn0011676,FBgn0051870,FBgn0032293,FBgn0027550,FBgn0024740,FBgn0260454,FBgn0027868,FBgn0032292,FBgn0032286,FBgn0024227,FBgn0032291,FBgn0032296,FBgn0032299,FBgn0032290,FBgn0032298,FBgn0032283,FBgn0262599,FBgn0004363,FBgn0032294,FBgn0015320,FBgn0260453,FBgn0023496,FBgn0032289,FBgn0069354,FBgn0032285,FBgn0032297,FBg…
FBgn0265794	FBgn0264442,FBgn0052831,FBgn0032360,FBgn0020270,FBgn0032359,FBgn0000287,FBgn0040233,FBgn0032358,FBgn0040232
FBgn0265795	FBgn0040233,FBgn0032359,FBgn0000287,FBgn0020270,FBgn0052831,FBgn0032360,Novel000017,FBgn0264442,FBgn0040232,FBgn0032358
FBgn0265796	FBgn0052831,FBgn0032360,Novel000017,FBgn0264442,FBgn0040233,FBgn0000287,FBgn0032359,FBgn0020270,FBgn0261648,FBgn0040232,FBgn0032358
FBgn0265797	FBgn0032358,FBgn0040232,FBgn0261648,FBgn0000287,FBgn0032359,FBgn0020270,FBgn0040233,Novel000017,FBgn0264442,FBgn0032360,FBgn0052831
FBgn0265798	FBgn0042126,FBgn0028425,FBgn0032397,FBgn0028707,FBgn0029137,FBgn0032402,FBgn0051865,FBgn0032388,FBgn0032400,FBgn0032404,FBgn0032401,FBgn0032407,FBgn0032406,FBgn0042125,FBgn0032393,FBgn0026392,FBgn0032385,FBgn0042127,FBgn0032390,FBgn0010497,FBgn0261266,Novel000036,FBgn0051864,FBgn0032391,FBgn0032394,FBgn0026391,FBgn0027081,FBgn0032398,FBgn0264815,FBgn0027505,FBgn0005664,FBgn0015797,FBgn0014019,FBg…
FBgn0265799	FBgn0032406,FBgn0032407,FBgn0042125,FBgn0032393,FBgn0026392,FBgn0032385,FBgn0042127,FBgn0032390,FBgn0261266,FBgn0010497,FBgn0028425,FBgn0042126,FBgn0032397,FBgn0028707,FBgn0032402,FBgn0029137,FBgn0051865,FBgn0032388,FBgn0032400,FBgn0032404,FBgn0032401,FBgn0003145,FBgn0032399,FBgn0032395,FBgn0032409,FBgn0085193,Novel000037,FBgn0263235,FBgn0026390,FBgn0032387,FBgn0032408,Novel000035,FBgn0085192,Nov…
FBgn0265800	FBgn0032402,FBgn0029137,FBgn0032388,FBgn0051865,FBgn0032404,FBgn0032401,FBgn0032400,FBgn0032415,FBgn0028707,FBgn0028425,FBgn0051760,FBgn0042126,FBgn0032397,FBgn0032390,FBgn0261266,FBgn0010497,FBgn0032416,FBgn0042125,FBgn0032406,FBgn0032407,FBgn0032393,FBgn0032385,FBgn0042127,FBgn0015797,FBgn0027505,FBgn0005664,FBgn0051866,FBgn0014019,FBgn0032405,FBgn0263234,FBgn0032391,FBgn0051864,Novel000036,FBg…
FBgn0265801	FBgn0028707,FBgn0028425,FBgn0051760,FBgn0042126,FBgn0032397,FBgn0032415,FBgn0032420,FBgn0032404,FBgn0032401,FBgn0032400,FBgn0000114,FBgn0029137,FBgn0032402,FBgn0051865,FBgn0032388,FBgn0032393,FBgn0042127,FBgn0032416,FBgn0042125,FBgn0032406,FBgn0032407,FBgn0261266,FBgn0010497,FBgn0032390,FBgn0032398,FBgn0027081,FBgn0032394,FBgn0051864,FBgn0032391,FBgn0051866,FBgn0014019,FBgn0263234,FBgn0032405,FBg…
FBgn0265802	FBgn0032414,FBgn0003145,FBgn0032421,FBgn0032399,FBgn0051861,FBgn0051860,FBgn0085193,FBgn0032409,FBgn0032395,Novel000037,FBgn0263235,FBgn0032422,FBgn0032408,FBgn0032387,FBgn0032419,FBgn0085192,FBgn0032391,FBgn0051864,FBgn0032394,FBgn0027081,FBgn0032398,FBgn0027505,FBgn0015797,FBgn0014019,FBgn0263234,FBgn0032405,FBgn0051866,FBgn0032407,FBgn0032406,FBgn0032416,FBgn0042125,FBgn0032393,FBgn0042127,FBg…
FBgn0265803	FBgn0032422,Novel000037,FBgn0263235,FBgn0032408,FBgn0032419,FBgn0085192,FBgn0003145,FBgn0032421,FBgn0032414,FBgn0051860,FBgn0032399,FBgn0051861,FBgn0085193,FBgn0032409,FBgn0032395,FBgn0027505,FBgn0015797,FBgn0032405,FBgn0263234,FBgn0014019,FBgn0051866,FBgn0051864,FBgn0032391,FBgn0032394,FBgn0027081,FBgn0032398,FBgn0032390,FBgn0261266,FBgn0010497,FBgn0032406,FBgn0032407,FBgn0042125,FBgn0032416,FBg…
FBgn0265804	FBgn0028707,FBgn0032397,FBgn0028425,FBgn0051760,FBgn0042126,FBgn0032415,FBgn0032401,FBgn0032404,FBgn0032420,FBgn0032400,FBgn0000114,FBgn0029137,FBgn0032402,FBgn0051865,FBgn0032388,FBgn0042127,FBgn0032393,FBgn0042125,FBgn0032416,FBgn0032406,FBgn0032407,FBgn0010497,FBgn0261266,FBgn0032390,FBgn0027081,FBgn0032398,FBgn0032394,FBgn0051864,FBgn0032391,FBgn0051866,FBgn0032405,FBgn0263234,FBgn0014019,FBg…
FBgn0265805	FBgn0032419,FBgn0032408,FBgn0263235,Novel000037,FBgn0032422,FBgn0032409,FBgn0032395,FBgn0085193,FBgn0051861,FBgn0032399,FBgn0051860,FBgn0032414,FBgn0003145,FBgn0032421,FBgn0051866,FBgn0014019,FBgn0032405,FBgn0263234,FBgn0015797,FBgn0027505,FBgn0027081,FBgn0032398,FBgn0032394,FBgn0051864,FBgn0032391,FBgn0010497,FBgn0032393,FBgn0042127,FBgn0032416,FBgn0042125,FBgn0032407,FBgn0032406,FBgn0032404,FBg…
FBgn0265806	FBgn0004394,FBgn0032439,FBgn0032442,FBgn0259176,FBgn0051858,FBgn0085424
FBgn0265807	FBgn0085424,FBgn0051858,FBgn0259176,FBgn0032442,FBgn0032439,FBgn0004394
FBgn0265808	FBgn0004394,FBgn0032439,FBgn0085424,FBgn0032442,FBgn0051858,FBgn0259176
FBgn0265809	FBgn0032442,FBgn0051858,FBgn0259176,FBgn0085424,FBgn0004394,FBgn0032439
FBgn0265812	FBgn0265668,FBgn0261925,FBgn0051826,FBgn0028645,FBgn0028901,FBgn0001986,FBgn0262150,FBgn0001987,FBgn0032577,FBgn0264260,FBgn0001990,FBgn0028903,FBgn0028507,FBgn0028935,FBgn0028902,FBgn0041183,FBgn0051821,FBgn0010382,FBgn0051735,FBgn0028900,FBgn0041627,FBgn0051823,FBgn0001989
FBgn0265813	FBgn0028901,FBgn0001986,FBgn0262150,FBgn0001987,FBgn0264260,FBgn0028903,FBgn0264545,FBgn0001990,FBgn0265668,FBgn0261925,FBgn0051826,FBgn0028645,FBgn0051821,FBgn0010382,FBgn0051735,FBgn0041627,FBgn0028900,FBgn0051823,FBgn0001989,FBgn0028507,FBgn0028935,FBgn0028902,FBgn0028863,FBgn0041183
FBgn0265814	FBgn0021906,FBgn0261509,FBgn0051935,FBgn0086698,FBgn0031359,FBgn0086758,FBgn0264881,FBgn0031356,FBgn0011570,FBgn0031357,FBgn0026397,FBgn0026398,FBgn0031351,FBgn0031347
FBgn0265815	FBgn0261357,FBgn0000120,FBgn0032663,FBgn0261531,FBgn0051740,FBgn0262960,FBgn0261358,FBgn0032656,FBgn0051742,FBgn0040989,FBgn0243486,FBgn0032660,FBgn0051741,FBgn0032664,FBgn0002939,FBgn0023096,FBgn0032658
FBgn0265816	FBgn0262960,FBgn0261358,FBgn0032656,FBgn0051742,FBgn0040989,FBgn0243486,FBgn0032660,FBgn0261357,FBgn0000120,FBgn0261531,FBgn0032663,FBgn0051740,FBgn0023096,FBgn0032658,FBgn0051741,FBgn0032664,FBgn0002939
FBgn0265817	FBgn0032907,FBgn0032908,FBgn0263996,FBgn0032906,FBgn0051676,FBgn0032894,FBgn0266369,FBgn0032899,FBgn0250867,FBgn0051675,FBgn0032901,FBgn0032896,FBgn0032895,FBgn0032897,FBgn0032900
FBgn0265818	FBgn0031436,FBgn0000490,FBgn0031428,FBgn0051948,FBgn0031430,FBgn0085343,FBgn0250835,FBgn0026778,FBgn0031434,FBgn0085476,FBgn0026479,FBgn0031426,FBgn0085477,FBgn0031431,FBgn0011818,FBgn0264988,FBgn0031435,FBgn0264978,FBgn0031424,FBgn0031437,FBgn0031432,FBgn0041337
FBgn0265819	FBgn0026394,FBgn0028482,FBgn0031592,FBgn0031589,FBgn0003941,FBgn0040102,FBgn0010473,FBgn0031585,FBgn0001075,FBgn0265269,FBgn0031590,FBgn0051961
FBgn0265820	FBgn0083938,FBgn0031620,FBgn0031623,FBgn0000227,FBgn0264342,FBgn0031621,FBgn0085380,FBgn0031617,FBgn0031619,FBgn0031613,FBgn0053196,Novel000029,FBgn0031622
FBgn0265821	Novel000014,FBgn0264343,FBgn0031897,FBgn0085407,FBgn0263133,FBgn0031888,FBgn0264344,FBgn0031900,FBgn0031893,FBgn0259111,FBgn0010453,FBgn0031895,FBgn0031896,FBgn0031894,FBgn0051909
FBgn0265822	FBgn0051908,FBgn0031885,FBgn0031888,FBgn0031882,FBgn0266666,FBgn0085407,FBgn0031887,FBgn0263026,FBgn0000053,FBgn0051907,FBgn0031881,FBgn0262872,FBgn0031883,FBgn0003046,FBgn0263027,FBgn0031879,FBgn0031886
FBgn0265823	FBgn0031893,FBgn0031885,FBgn0031896,FBgn0031887,FBgn0051907,Novel000014,FBgn0266666,FBgn0031888,FBgn0085407,FBgn0264344,FBgn0262872,FBgn0031894,FBgn0031895,FBgn0259111,FBgn0263133,FBgn0031897,FBgn0264343,FBgn0031886
FBgn0265824	FBgn0031893,FBgn0031900,FBgn0264344,FBgn0031894,FBgn0031896,FBgn0031895,FBgn0051909,FBgn0010453,FBgn0259111,Novel000014,FBgn0263133,FBgn0031888,FBgn0264343,FBgn0085407,FBgn0031897
FBgn0265825	FBgn0029095,FBgn0020305,FBgn0031283,FBgn0031285,FBgn0031276,FBgn0031286,FBgn0031282,FBgn0031284,FBgn0053526,FBgn0041250,FBgn0000497,FBgn0010583,FBgn0000442,FBgn0031277,FBgn0031281,FBgn0031279,FBgn0086130,FBgn0031289,FBgn0015621,FBgn0026438,FBgn0020545,FBgn0011244,FBgn0040725,FBgn0020304,FBgn0031288,FBgn0031287,FBgn0051658,FBgn0031275
FBgn0265826	FBgn0051708,FBgn0032094,FBgn0051609,FBgn0032096,FBgn0032090,FBgn0032095,FBgn0032100,FBgn0052982,FBgn0041092,FBgn0032101
FBgn0265827	FBgn0032101,FBgn0041092,FBgn0052982,FBgn0032100,FBgn0032095,FBgn0032090,FBgn0051609,FBgn0032096,FBgn0051708,FBgn0032094
FBgn0265828	FBgn0032100,FBgn0052982,FBgn0032095,FBgn0041092,FBgn0032101,FBgn0032094,FBgn0051708,FBgn0051609,FBgn0032096,FBgn0032090
FBgn0265829	FBgn0032258,FBgn0032253,FBgn0032264,FBgn0065110,FBgn0267828,FBgn0085190,FBgn0032259,FBgn0250826,FBgn0032268,FBgn0051872,FBgn0026431,FBgn0051721,FBgn0032266,FBgn0032265,FBgn0032252,FBgn0032269,FBgn0032256,FBgn0032271,FBgn0010398,FBgn0051719,FBgn0032261,FBgn0086347,FBgn0032260,FBgn0032262,FBgn0027611
FBgn0265830	FBgn0030421,FBgn0030418,FBgn0015024,FBgn0030425,FBgn0011837,FBgn0020513,FBgn0052647,FBgn0265523,FBgn0259171,FBgn0030420,FBgn0030412,FBgn0030417
FBgn0265831	FBgn0030479,FBgn0030466,FBgn0010198,FBgn0040309,FBgn0030485,FBgn0266375,FBgn0030468,FBgn0030486,FBgn0030482,FBgn0030477,FBgn0265416,FBgn0030474,FBgn0030483,FBgn0026749,FBgn0261085,FBgn0030484,FBgn0085353,FBgn0030478,FBgn0030467,FBgn0030481,FBgn0030480
FBgn0265832	FBgn0010198,FBgn0040309,FBgn0030479,FBgn0030482,FBgn0030468,FBgn0030486,FBgn0266375,FBgn0030485,FBgn0030483,FBgn0030474,FBgn0265416,FBgn0030477,FBgn0030480,FBgn0030478,FBgn0030481,FBgn0030467,FBgn0261085,FBgn0026749,FBgn0085353,FBgn0030484
FBgn0265837	FBgn0265833,FBgn0034476,FBgn0034478,Novel000069,FBgn0265834,FBgn0261581,FBgn0034479,FBgn0034477,FBgn0265762,FBgn0050447,FBgn0034480,FBgn0262824,FBgn0261580,FBgn0043532
FBgn0265838	FBgn0034480,FBgn0050447,FBgn0034477,FBgn0265762,FBgn0261580,FBgn0043532,FBgn0262824,FBgn0034478,Novel000069,FBgn0265833,FBgn0261581,FBgn0034479,FBgn0265834
FBgn0265839	FBgn0265833,FBgn0034478,Novel000069,FBgn0265834,FBgn0261581,FBgn0034479,FBgn0050447,FBgn0034480,FBgn0262824,FBgn0261580
FBgn0265840	FBgn0050447,FBgn0034480,FBgn0262824,FBgn0261580,FBgn0265833,FBgn0034478,Novel000069,FBgn0265834,FBgn0004364,FBgn0261581,FBgn0034479
FBgn0265841	FBgn0261580,FBgn0262824,FBgn0034480,FBgn0050447,FBgn0261581,FBgn0034479,FBgn0004364,FBgn0265834,FBgn0034478,Novel000069,FBgn0265833
FBgn0265842	FBgn0034481,FBgn0034479,FBgn0004364,FBgn0034480,Novel000069
FBgn0265843	FBgn0034481,FBgn0004364,Novel000069,FBgn0034480
FBgn0265844	FBgn0034480,Novel000069,FBgn0004364,FBgn0034481
FBgn0265845	FBgn0034484,FBgn0265835,FBgn0034483,FBgn0034485,FBgn0265836,FBgn0004364,FBgn0034481
FBgn0265846	FBgn0034484,FBgn0265835,FBgn0034483,FBgn0034485,FBgn0265836,FBgn0004364,FBgn0034481
FBgn0265847	FBgn0034485,FBgn0034483,FBgn0265835,FBgn0034484,FBgn0004364,FBgn0265836,FBgn0034481
FBgn0265849	FBgn0034502,FBgn0034485,FBgn0034500,FBgn0085228,FBgn0025720,FBgn0034506,FBgn0034495,FBgn0034493,FBgn0034491,FBgn0034497,FBgn0034505,FBgn0034483,FBgn0027529,FBgn0034484,FBgn0034494,FBgn0005655,FBgn0010411,FBgn0026136,FBgn0034507,FBgn0034503,FBgn0034498,FBgn0034504,FBgn0034501,FBgn0265836,FBgn0034489,FBgn0034488,FBgn0034496,FBgn0034487,FBgn0042198,Novel000070,FBgn0265835,FBgn0034486,FBgn0034490,FBg…
FBgn0265850	FBgn0034490,FBgn0034499,FBgn0003114,FBgn0034496,FBgn0034487,FBgn0042198,Novel000070,FBgn0265835,FBgn0034486,FBgn0265836,FBgn0034489,FBgn0034488,FBgn0034503,FBgn0034498,FBgn0034504,FBgn0034501,FBgn0027529,FBgn0034484,FBgn0034483,FBgn0005655,FBgn0034494,FBgn0026136,FBgn0010411,FBgn0034507,FBgn0034493,FBgn0034495,FBgn0034491,FBgn0034497,FBgn0034505,FBgn0034500,FBgn0085228,FBgn0025720,FBgn0034506,FBg…
FBgn0265851	FBgn0034485,FBgn0034502,FBgn0034506,FBgn0025720,FBgn0085228,FBgn0034500,FBgn0034505,FBgn0034497,FBgn0034495,FBgn0034493,FBgn0034491,FBgn0034507,FBgn0026136,FBgn0010411,FBgn0034494,FBgn0005655,FBgn0027529,FBgn0034483,FBgn0034484,FBgn0034501,FBgn0034504,FBgn0034503,FBgn0034498,FBgn0034488,FBgn0265836,FBgn0034489,FBgn0034486,FBgn0265835,Novel000070,FBgn0042198,FBgn0034487,FBgn0034496,FBgn0003114,FBg…
FBgn0265852	FBgn0034507,FBgn0026136,FBgn0010411,FBgn0034494,FBgn0005655,FBgn0027529,FBgn0034483,FBgn0034484,FBgn0034495,FBgn0034491,FBgn0034493,FBgn0034505,FBgn0034497,FBgn0025720,FBgn0085228,FBgn0034500,FBgn0034506,FBgn0034502,FBgn0034485,FBgn0034499,FBgn0034490,FBgn0003114,Novel000070,FBgn0042198,FBgn0034487,FBgn0034496,FBgn0034486,FBgn0265835,FBgn0034488,FBgn0265836,FBgn0034489,FBgn0034498,FBgn0034503,FBg…
FBgn0265853	FBgn0034497,FBgn0034505,FBgn0034495,FBgn0034493,FBgn0034491,FBgn0034484,FBgn0027529,FBgn0034494,FBgn0005655,FBgn0010411,FBgn0026136,FBgn0034507,FBgn0034485,FBgn0034502,FBgn0034506,FBgn0034500,FBgn0085228,FBgn0025720,FBgn0265835,FBgn0034486,FBgn0034496,FBgn0034487,FBgn0042198,Novel000070,FBgn0003114,FBgn0034490,FBgn0034499,FBgn0034504,FBgn0034501,FBgn0034498,FBgn0034503,FBgn0034489,FBgn0265836,FBg…
FBgn0265854	FBgn0043534,FBgn0034511,FBgn0034512,FBgn0050154,FBgn0034515,FBgn0050151,FBgn0050148,FBgn0034521,FBgn0028622,FBgn0034520,FBgn0034510,FBgn0043536,FBgn0034518,FBgn0034519,FBgn0263000,FBgn0267791,FBgn0086604,FBgn0050145,FBgn0043535,FBgn0034513,FBgn0034514,FBgn0034517,FBgn0034523,FBgn0034509
FBgn0265855	FBgn0034514,FBgn0043535,FBgn0034513,FBgn0034523,FBgn0034517,FBgn0034509,FBgn0267791,FBgn0263000,FBgn0034519,FBgn0050145,FBgn0086604,FBgn0034510,FBgn0028622,FBgn0034520,FBgn0043536,FBgn0034518,FBgn0050154,FBgn0034515,FBgn0050148,FBgn0050151,FBgn0043534,FBgn0034511,FBgn0034512,FBgn0034521
FBgn0265856	FBgn0267791,FBgn0263000,FBgn0034519,FBgn0050145,FBgn0086604,FBgn0034514,FBgn0034513,FBgn0043535,FBgn0034523,FBgn0034517,FBgn0034509,FBgn0050154,FBgn0050151,FBgn0050148,FBgn0034515,FBgn0034511,FBgn0034512,FBgn0043534,FBgn0034521,FBgn0034510,FBgn0034520,FBgn0028622,FBgn0034518,FBgn0043536,FBgn0050147
FBgn0265857	FBgn0086604,FBgn0050145,FBgn0263000,FBgn0034519,FBgn0267791,FBgn0034509,FBgn0034523,FBgn0034517,FBgn0034513,FBgn0043535,FBgn0034514,FBgn0034521,FBgn0034512,FBgn0034511,FBgn0043534,FBgn0050151,FBgn0050154,FBgn0034515,FBgn0050148,FBgn0034518,FBgn0050147,FBgn0043536,FBgn0028622,FBgn0034520,FBgn0034510
FBgn0265858	FBgn0034510,FBgn0034520,FBgn0028622,FBgn0034518,FBgn0043536,FBgn0050147,FBgn0050151,FBgn0034515,FBgn0050148,FBgn0050154,FBgn0034512,FBgn0034511,FBgn0043534,FBgn0034521,FBgn0034514,FBgn0034513,FBgn0043535,FBgn0034517,FBgn0034523,FBgn0034509,FBgn0267791,FBgn0034519,FBgn0263000,FBgn0050145,FBgn0086604
FBgn0265859	FBgn0034521,FBgn0050151,FBgn0050154,FBgn0050148,FBgn0034515,FBgn0043534,FBgn0034512,FBgn0034511,FBgn0050147,FBgn0043536,FBgn0034518,FBgn0034510,FBgn0034520,FBgn0028622,FBgn0050145,FBgn0086604,FBgn0267791,FBgn0034519,FBgn0263000,FBgn0034523,FBgn0034509,FBgn0034517,FBgn0034514,FBgn0043535,FBgn0034513
FBgn0265860	FBgn0034520,FBgn0028622,FBgn0034510,FBgn0043536,FBgn0050147,FBgn0034518,FBgn0043534,FBgn0034512,FBgn0034511,FBgn0050151,FBgn0050154,FBgn0034515,FBgn0050148,FBgn0034521,FBgn0043535,FBgn0034513,FBgn0034514,FBgn0034523,FBgn0034517,FBgn0034509,FBgn0263000,FBgn0034519,FBgn0267791,FBgn0050145,FBgn0086604
FBgn0265861	FBgn0034511,FBgn0034512,FBgn0043534,FBgn0050154,FBgn0050151,FBgn0034515,FBgn0050148,FBgn0034521,FBgn0028622,FBgn0034520,FBgn0034510,FBgn0034528,FBgn0034518,FBgn0050147,FBgn0043536,FBgn0263000,FBgn0034519,FBgn0267791,FBgn0034527,FBgn0050145,FBgn0086604,FBgn0034513,FBgn0043535,FBgn0034514,FBgn0034529,FBgn0034523,FBgn0034517,FBgn0034509
FBgn0265862	FBgn0034521,FBgn0034511,FBgn0034512,FBgn0043534,FBgn0050151,FBgn0050148,FBgn0034515,FBgn0050154,FBgn0034518,FBgn0043536,FBgn0050147,FBgn0034520,FBgn0028622,FBgn0034528,FBgn0034530,FBgn0034510,FBgn0050145,FBgn0086604,FBgn0263000,FBgn0034519,FBgn0034527,FBgn0267791,FBgn0034529,FBgn0034523,FBgn0034517,FBgn0034509,FBgn0034513,FBgn0043535,FBgn0034514
FBgn0265863	FBgn0034521,FBgn0034515,FBgn0050154,FBgn0050148,FBgn0034534,FBgn0034512,FBgn0043534,FBgn0050147,FBgn0034510,FBgn0034532,FBgn0086604,FBgn0050145,FBgn0034527,FBgn0034519,FBgn0263000,FBgn0250850,FBgn0034529,FBgn0034523,FBgn0034517,FBgn0034514,FBgn0034513,FBgn0043535,FBgn0050151,FBgn0034511,FBgn0034518,FBgn0043536,FBgn0034528,FBgn0034530,FBgn0034520,FBgn0028622,FBgn0267791,FBgn0034509
FBgn0265865	FBgn0030504,FBgn0265416,FBgn0030494,FBgn0030512,FBgn0265726,FBgn0030493,FBgn0030511,FBgn0030505,FBgn0030506,FBgn0265610,FBgn0030510,FBgn0030500,FBgn0030501,FBgn0030507,FBgn0030508,FBgn0030503,FBgn0030502,FBgn0030499,FBgn0052631,FBgn0086674,FBgn0030509,FBgn0004169,FBgn0030495,FBgn0052633,FBgn0030492
FBgn0265866	FBgn0053240,FBgn0053236,FBgn0053241,FBgn0053237,FBgn0030536,FBgn0053238,FBgn0053247,FBgn0267033,FBgn0053245,FBgn0000173,FBgn0053243,FBgn0053246,FBgn0053244,FBgn0053239,FBgn0044817,FBgn0053242
FBgn0265868	FBgn0030544,FBgn0030542,FBgn0053238,FBgn0030540,FBgn0053237,FBgn0053241,FBgn0053236,FBgn0040153,FBgn0053240,FBgn0040871,FBgn0053242,FBgn0026713,FBgn0053244,FBgn0053239,FBgn0053246,FBgn0053243,FBgn0053247,FBgn0030541,FBgn0053245,FBgn0030545,FBgn0030538,FBgn0052603,FBgn0004649,FBgn0030539,FBgn0030537,FBgn0030543
FBgn0265869	FBgn0053244,FBgn0053242,FBgn0053247,FBgn0052603,FBgn0030545,FBgn0030543,FBgn0030537,FBgn0030539,FBgn0030544,FBgn0053238,FBgn0030552,FBgn0053236,FBgn0053237,FBgn0053246,FBgn0053239,FBgn0026713,FBgn0040871,FBgn0030541,FBgn0053245,FBgn0053243,FBgn0004649,FBgn0030538,FBgn0030555,FBgn0030551,FBgn0030542,FBgn0030556,FBgn0030554,FBgn0053240,FBgn0040153,FBgn0053241,FBgn0259166,FBgn0030540
FBgn0265870	FBgn0061361,FBgn0000615,FBgn0263741,FBgn0263850,FBgn0267791,FBgn0041240,FBgn0061362,FBgn0034530,FBgn0034528,FBgn0034537,FBgn0034539,FBgn0263743,FBgn0034542,FBgn0085231,FBgn0034545,FBgn0250850,FBgn0034529,FBgn0034532,FBgn0263849,FBgn0034541,FBgn0034548,FBgn0034527,FBgn0050147,FBgn0263848,FBgn0034546,FBgn0263760,FBgn0034535,FBgn0034540,FBgn0263742,FBgn0040726,FBgn0034538,FBgn0034543,FBgn0085230,FBg…
FBgn0265871	FBgn0034537,FBgn0034530,FBgn0034528,FBgn0011674,FBgn0034545,FBgn0085231,FBgn0034542,FBgn0034539,FBgn0263743,FBgn0000615,FBgn0061361,FBgn0061362,FBgn0041240,FBgn0263850,FBgn0263741,FBgn0034540,FBgn0034535,FBgn0263760,FBgn0034546,FBgn0263848,FBgn0034551,FBgn0034534,FBgn0085230,FBgn0034543,FBgn0034538,FBgn0040726,FBgn0263742,FBgn0250850,FBgn0034529,FBgn0034548,FBgn0034541,FBgn0263849,FBgn0034532
FBgn0265872	FBgn0053177,FBgn0030608,FBgn0000535,FBgn0030616,FBgn0030600,FBgn0030605,FBgn0030611,FBgn0030607,FBgn0263994,FBgn0053178,FBgn0264389,FBgn0030613,FBgn0030612,FBgn0030614,FBgn0030617,FBgn0030603,FBgn0030610,FBgn0030615,FBgn0260006,Novel000234,FBgn0052594
FBgn0265873	FBgn0030616,FBgn0000535,FBgn0030608,FBgn0053177,FBgn0263994,FBgn0030607,FBgn0030611,FBgn0030605,FBgn0030600,FBgn0030617,FBgn0030614,FBgn0030613,FBgn0030612,FBgn0264389,FBgn0053178,FBgn0052594,Novel000234,FBgn0030615,FBgn0260006,FBgn0030610,FBgn0030603
FBgn0265874	Novel000235,FBgn0261703,FBgn0030628,FBgn0262485,FBgn0030631,FBgn0026428,FBgn0030620,FBgn0003132,FBgn0263994,FBgn0262486,FBgn0263257,FBgn0030624,FBgn0030634,FBgn0030623,FBgn0000028,FBgn0052588,FBgn0030622,FBgn0004924,FBgn0030630,FBgn0030625,FBgn0030629,FBgn0015926
FBgn0265875	FBgn0003132,FBgn0030620,FBgn0263257,FBgn0262486,Novel000235,FBgn0030628,FBgn0261703,FBgn0030631,FBgn0026428,FBgn0262485,FBgn0004924,FBgn0030622,FBgn0030625,FBgn0030630,FBgn0015926,FBgn0030629,FBgn0030634,FBgn0030624,FBgn0030623,FBgn0000028,FBgn0052588
FBgn0265876	FBgn0034554,FBgn0000615,FBgn0263850,FBgn0034548,FBgn0263741,FBgn0263849,FBgn0041240,FBgn0016984,FBgn0263848,FBgn0011674,FBgn0034552,FBgn0263760,FBgn0034546,FBgn0034543,FBgn0034542,FBgn0085230,FBgn0263743,FBgn0040726,FBgn0263742,FBgn0034551,FBgn0034545,FBgn0085231,FBgn0034553
FBgn0265877	FBgn0263760,FBgn0040653,FBgn0034546,FBgn0067905,FBgn0263848,FBgn0011674,FBgn0034552,FBgn0034545,FBgn0034551,FBgn0085231,FBgn0034553,FBgn0085230,FBgn0034558,FBgn0040726,FBgn0050295,FBgn0263743,FBgn0263742,FBgn0034554,FBgn0041240,FBgn0016984,FBgn0263850,FBgn0034548,FBgn0263741,FBgn0263849
FBgn0265878	FBgn0034553,FBgn0085231,FBgn0034551,FBgn0263742,FBgn0050295,FBgn0263743,FBgn0040726,FBgn0034558,FBgn0085230,FBgn0040653,FBgn0034560,FBgn0263760,FBgn0034552,FBgn0011674,FBgn0015524,FBgn0067905,FBgn0263848,FBgn0016984,FBgn0263849,FBgn0263741,FBgn0020617,FBgn0263850,FBgn0034548,FBgn0034554
FBgn0265879	FBgn0052190,FBgn0052182,FBgn0036764,FBgn0036754,FBgn0036762,FBgn0036750,FBgn0036759,FBgn0036751,FBgn0052181,FBgn0052188,FBgn0261997,FBgn0261998,FBgn0036765,FBgn0261401,FBgn0043025,FBgn0036752,FBgn0261402,FBgn0052187,FBgn0001134,FBgn0036763,Novel000107,FBgn0036766,FBgn0036749,FBgn0036761,FBgn0054002,FBgn0052183,FBgn0036760,FBgn0036756,FBgn0036747,FBgn0261294,FBgn0052191,FBgn0036757,FBgn0052189
FBgn0265880	FBgn0052195,FBgn0264746,FBgn0036775,FBgn0262100,Novel000131,FBgn0264747,FBgn0259739,FBgn0003997,FBgn0036778,FBgn0036777,FBgn0036774,FBgn0020300,FBgn0036781,FBgn0036780,FBgn0085282,FBgn0052192,FBgn0002901,FBgn0036782,FBgn0036773,FBgn0000568,Novel000130,FBgn0264748
FBgn0265881	FBgn0011706,FBgn0036786,FBgn0028415,FBgn0036789,FBgn0052196,FBgn0052198,FBgn0028416,FBgn0036787
FBgn0265882	FBgn0028415,FBgn0036789,FBgn0011706,FBgn0036786,FBgn0036787,FBgn0028416,FBgn0052196,FBgn0052198
FBgn0265883	FBgn0052198,FBgn0052196,FBgn0028416,FBgn0036787,FBgn0036790,FBgn0036786,FBgn0011706,FBgn0036789,FBgn0028415
FBgn0265884	FBgn0036789,FBgn0028415,FBgn0036786,FBgn0011706,FBgn0036787,FBgn0028416,FBgn0036790,FBgn0052198,FBgn0052196
FBgn0265885	FBgn0036814,FBgn0036806,FBgn0036809,FBgn0052199,FBgn0040322,FBgn0001078,FBgn0036810,FBgn0036808,FBgn0036799,FBgn0036793,FBgn0040323,FBgn0042134,FBgn0052201,FBgn0036807,FBgn0260027,FBgn0036811,FBgn0052202,FBgn0259791,FBgn0013717,FBgn0036796,FBgn0085283,FBgn0036801,FBgn0036804,FBgn0036813,FBgn0036812,FBgn0036805
FBgn0265886	FBgn0085285,FBgn0036834,FBgn0052203,FBgn0036846,FBgn0036842,FBgn0036849,FBgn0036844,FBgn0036837,FBgn0015586,FBgn0036835,FBgn0016797,FBgn0002945,FBgn0263326,FBgn0036851,FBgn0036836,FBgn0036838,FBgn0036847,FBgn0036843,FBgn0036850,FBgn0036848,FBgn0036839
FBgn0265887	FBgn0036872,FBgn0036875,FBgn0036881,FBgn0036897,FBgn0036882,FBgn0036888,FBgn0036870,FBgn0262517,FBgn0052213,FBgn0036878,FBgn0264477,FBgn0036871,FBgn0036895,FBgn0036893,FBgn0005386,FBgn0260461,FBgn0036887,FBgn0020277,FBgn0036890,FBgn0036874,FBgn0052208,FBgn0036899,FBgn0036886,FBgn0036896,FBgn0036877,FBgn0260655,FBgn0036879,FBgn0052214,FBgn0036880,FBgn0010417,FBgn0036891,FBgn0036889,FBgn0036892,FBg…
FBgn0265888	FBgn0264477,FBgn0036895,FBgn0036871,FBgn0036878,FBgn0052213,FBgn0036887,FBgn0036890,FBgn0020277,FBgn0005386,FBgn0036893,FBgn0260461,FBgn0036875,FBgn0036881,FBgn0036872,FBgn0036870,FBgn0262517,FBgn0036897,FBgn0036888,FBgn0036882,FBgn0036889,FBgn0036892,FBgn0022774,FBgn0029094,FBgn0052212,FBgn0036876,FBgn0005564,FBgn0036873,FBgn0036886,FBgn0036896,FBgn0036899,FBgn0260655,FBgn0036877,FBgn0036874,FBg…
FBgn0265889	FBgn0036891,FBgn0010417,FBgn0260434,FBgn0260653,FBgn0036888,FBgn0262516,FBgn0266136,FBgn0036897,FBgn0261360,FBgn0260655,FBgn0036896,FBgn0261341,FBgn0036899,FBgn0020277,FBgn0036890,FBgn0036900,FBgn0036887,FBgn0029094,FBgn0005386,FBgn0005564,FBgn0036893,FBgn0004623,FBgn0022774,FBgn0036895,FBgn0036889,FBgn0036905,FBgn0036892,FBgn0261361
FBgn0265890	FBgn0036932,FBgn0036934,FBgn0262022,FBgn0036936,FBgn0036939,FBgn0036945,FBgn0261574,FBgn0261556,FBgn0036929,FBgn0036941,FBgn0036949,FBgn0036938,FBgn0036942,FBgn0036940,FBgn0036947,FBgn0005198,FBgn0036937,FBgn0036948,FBgn0036935,FBgn0036931
FBgn0265891	FBgn0001323,FBgn0037011,FBgn0037014,FBgn0001320,FBgn0037013,FBgn0085289,FBgn0037012,FBgn0037015
FBgn0265892	FBgn0037016,FBgn0085289,FBgn0037012,FBgn0037015,FBgn0001323,FBgn0037014,FBgn0037013,FBgn0001320
FBgn0265893	FBgn0037013,FBgn0001320,FBgn0001323,FBgn0037014,FBgn0037012,FBgn0037015,FBgn0037016,FBgn0085289
FBgn0265894	FBgn0001320,FBgn0037013,FBgn0037011,FBgn0001323,FBgn0037014,FBgn0037012,FBgn0037015,FBgn0085289
FBgn0265895	FBgn0037015,FBgn0037012,FBgn0085289,FBgn0037010,FBgn0001320,FBgn0037013,FBgn0037014,FBgn0001323,FBgn0037011
FBgn0265896	FBgn0037015,FBgn0001320,FBgn0001323,FBgn0045474,FBgn0085289,FBgn0037014,FBgn0037016
FBgn0265897	FBgn0053287,FBgn0037040,FBgn0259972,FBgn0027364,FBgn0052432,FBgn0037022,FBgn0011591,FBgn0037035,FBgn0037025,FBgn0037030,FBgn0037027,FBgn0037023,FBgn0037024,FBgn0037026,FBgn0037037,FBgn0027055,FBgn0040636,FBgn0259243,FBgn0053286,FBgn0037038,FBgn0086915,FBgn0040637,FBgn0037031,FBgn0037039,FBgn0264552,FBgn0037028,FBgn0037036
FBgn0265898	FBgn0037147,FBgn0004514,FBgn0029091,FBgn0037146,FBgn0037149,FBgn0000100,FBgn0037140,FBgn0037144,FBgn0037151,FBgn0037150,FBgn0037141,FBgn0263249,FBgn0004414,FBgn0027532,FBgn0000045,FBgn0262737,FBgn0259973,FBgn0037142
FBgn0265899	FBgn0027339,FBgn0052459,FBgn0052457,FBgn0044324,FBgn0266977,FBgn0037205,FBgn0052461,FBgn0037206,FBgn0037204,FBgn0037200,FBgn0037203,FBgn0037197,FBgn0010348,FBgn0037195,FBgn0053170,FBgn0037207,FBgn0052462,FBgn0053169,Novel000114,FBgn0037202,FBgn0037199
FBgn0265900	FBgn0052462,FBgn0037207,FBgn0053169,FBgn0037195,FBgn0262509,FBgn0053170,Novel000114,FBgn0037202,FBgn0037199,FBgn0052459,FBgn0027339,FBgn0037205,FBgn0266977,FBgn0037206,FBgn0052461,FBgn0037204,FBgn0037200,FBgn0037203,FBgn0037197,FBgn0010348,FBgn0052457,FBgn0044324
FBgn0265901	FBgn0024984,FBgn0000382,FBgn0040395,FBgn0023541,FBgn0023550,FBgn0040900,FBgn0053548,FBgn0005670,FBgn0004397,FBgn0040394,FBgn0003116,FBgn0025629,FBgn0023526,FBgn0011576,FBgn0023529,FBgn0025624,FBgn0023542,FBgn0023523,FBgn0040899,FBgn0085362,FBgn0004861,FBgn0013432,FBgn0000377,FBgn0029608,FBgn0023507,FBgn0027296,FBgn0023527,FBgn0000810,FBgn0004655,FBgn0003048,FBgn0023528,FBgn0029606,FBgn0004654,FBg…
FBgn0265902	FBgn0030869,FBgn0030874,FBgn0030868,FBgn0030880,FBgn0000617,FBgn0030872,FBgn0052495,FBgn0030878,FBgn0030870,FBgn0026058,FBgn0030876,FBgn0052554,FBgn0030873,FBgn0024184,FBgn0030883,FBgn0003380,FBgn0259168,FBgn0030877,FBgn0027605,FBgn0030871,FBgn0030881,FBgn0030884,FBgn0030882,FBgn0261570,FBgn0052557
FBgn0265903	FBgn0263706,FBgn0040877,FBgn0027602,FBgn0030839,FBgn0030844,FBgn0030846,FBgn0030841,FBgn0030847,FBgn0011758,FBgn0028343,FBgn0030840
FBgn0265904	FBgn0261057,FBgn0051802,FBgn0000636,FBgn0011559,FBgn0032677,FBgn0261804,FBgn0085200,FBgn0051788,FBgn0263086,FBgn0051787,FBgn0263094
FBgn0265905	FBgn0051788,FBgn0263094,FBgn0263086,FBgn0051787,FBgn0261057,FBgn0011559,FBgn0032677,FBgn0000636,FBgn0085200,FBgn0261804
FBgn0265906	FBgn0051788,FBgn0263086,FBgn0051787,FBgn0263094,FBgn0000636,FBgn0011559,FBgn0032677,FBgn0261057,FBgn0261804,FBgn0085200
FBgn0265907	FBgn0000636,FBgn0032677,FBgn0011559,FBgn0261057,FBgn0051802,FBgn0261804,FBgn0085200,FBgn0051788,FBgn0051787,FBgn0263086,FBgn0263094
FBgn0265908	FBgn0031596,FBgn0031598,FBgn0022153,FBgn0085207,FBgn0265269,FBgn0027609,FBgn0031603,FBgn0031602,FBgn0020762,FBgn0031597,FBgn0031601,FBgn0261976,FBgn0026319,FBgn0010473,FBgn0027560,FBgn0025684,FBgn0259958,FBgn0262357,FBgn0262358,FBgn0028482,FBgn0031592,FBgn0053003,FBgn0031604,FBgn0031600,FBgn0085206
FBgn0265909	FBgn0085206,FBgn0031600,FBgn0031604,FBgn0053003,FBgn0031592,FBgn0028482,FBgn0262358,FBgn0262357,FBgn0259958,FBgn0025684,FBgn0027560,FBgn0010473,FBgn0026319,FBgn0031601,FBgn0261976,FBgn0031597,FBgn0020762,FBgn0031602,FBgn0027609,FBgn0031603,FBgn0265269,FBgn0085207,FBgn0022153,FBgn0031598,FBgn0031596
FBgn0265910	FBgn0085207,FBgn0022153,FBgn0031598,FBgn0031596,FBgn0031602,FBgn0031606,FBgn0027609,FBgn0031603,FBgn0265269,FBgn0026319,FBgn0031601,FBgn0261976,FBgn0031597,FBgn0020762,FBgn0010473,FBgn0027560,FBgn0259958,FBgn0025684,FBgn0028482,FBgn0031592,FBgn0262357,FBgn0262358,FBgn0085206,FBgn0031600,FBgn0031604,FBgn0053003
FBgn0265911	FBgn0259958,FBgn0025684,FBgn0031592,FBgn0028482,FBgn0262358,FBgn0262357,FBgn0031600,FBgn0085206,FBgn0053003,FBgn0031604,FBgn0085207,FBgn0022153,FBgn0031596,FBgn0031598,FBgn0031603,FBgn0027609,FBgn0031602,FBgn0031606,FBgn0265269,FBgn0031601,FBgn0261976,FBgn0026319,FBgn0020762,FBgn0031597,FBgn0027560,FBgn0010473
FBgn0265912	FBgn0032154,FBgn0032168,FBgn0032162,FBgn0032169,FBgn0032153,FBgn0040064,FBgn0032149,FBgn0029174,FBgn0032163,FBgn0032157,FBgn0032147,FBgn0051713,FBgn0032151,FBgn0011272,FBgn0032167,FBgn0051712,FBgn0032171,FBgn0259712,FBgn0032170,FBgn0024285,FBgn0032166,FBgn0032156,FBgn0015664,FBgn0004867,FBgn0032161,FBgn0032172,FBgn0259713,FBgn0032150,FBgn0053300,FBgn0051876,FBgn0010520,FBgn0032160,FBgn0000180,FBg…
FBgn0265913	FBgn0036451,FBgn0036460,FBgn0001120,FBgn0040809,FBgn0000216,FBgn0036454,FBgn0259099,FBgn0029148,FBgn0036450,FBgn0040487,FBgn0026320,FBgn0002778,FBgn0085274,FBgn0036459,FBgn0040296,FBgn0036449
FBgn0265916	FBgn0030943,FBgn0265598,FBgn0030947,FBgn0030944,FBgn0030940,FBgn0001079,FBgn0010383,FBgn0030937,FBgn0030938,FBgn0027335,FBgn0030946,FBgn0030949,FBgn0004959,FBgn0259231,FBgn0030941,FBgn0030945
FBgn0265918	FBgn0004959,FBgn0030949,FBgn0030946,FBgn0259198,FBgn0030952,FBgn0027335,FBgn0010383,FBgn0001079,FBgn0030940,FBgn0030944,FBgn0030951,FBgn0030943,FBgn0030947,FBgn0030956,FBgn0030954,FBgn0030955,FBgn0030945,FBgn0030941,FBgn0259231
FBgn0265919	FBgn0030976,FBgn0030974,FBgn0030975,FBgn0085430,FBgn0030970,FBgn0030966,FBgn0030964,FBgn0030969,FBgn0085451,FBgn0264090,FBgn0259927,FBgn0052544,FBgn0030968,FBgn0030973,FBgn0030963
FBgn0265920	FBgn0035557,FBgn0035542,FBgn0035546,FBgn0035544,FBgn0052249,FBgn0000038,FBgn0035555,FBgn0035554,FBgn0035550,FBgn0053777,FBgn0035539,FBgn0035543,FBgn0261526,FBgn0052248,FBgn0260657,FBgn0035540,FBgn0035551,FBgn0035558,FBgn0035545,FBgn0035541,FBgn0014073,FBgn0052241,FBgn0035552,FBgn0035553,FBgn0035547,FBgn0052243,FBgn0262733,FBgn0040699,FBgn0035548
FBgn0265921	FBgn0085387,FBgn0052507,FBgn0031132,FBgn0031127,FBgn0031130,FBgn0003300,FBgn0031128,FBgn0031126,FBgn0031129
FBgn0265922	FBgn0052820,FBgn0052819,FBgn0024807,FBgn0053502,Novel000209,FBgn0027588,FBgn0031182,FBgn0040028,FBgn0052857,FBgn0052500
FBgn0265923	FBgn0052857,FBgn0052500,FBgn0040028,FBgn0027588,FBgn0052820,FBgn0024807,FBgn0052819,FBgn0053502
FBgn0265924	FBgn0036152,FBgn0061469,FBgn0036144,FBgn0261553,FBgn0036147,FBgn0041094,FBgn0036139,FBgn0036153,FBgn0036150,FBgn0036141,FBgn0036145,FBgn0052082,FBgn0036146,FBgn0052076,FBgn0036154,FBgn0036143,FBgn0036142,FBgn0064766
FBgn0265925	FBgn0041094,FBgn0036153,FBgn0036139,FBgn0036141,FBgn0036150,FBgn0061469,FBgn0036152,FBgn0036144,FBgn0261553,FBgn0036147,FBgn0036146,FBgn0036154,FBgn0052076,FBgn0036142,FBgn0064766,FBgn0036143,FBgn0036145,FBgn0052082
FBgn0265926	FBgn0041094,FBgn0036150,FBgn0036141,FBgn0036139,FBgn0036153,FBgn0036144,FBgn0036152,FBgn0061469,FBgn0036147,FBgn0261553,FBgn0036146,FBgn0036143,FBgn0064766,FBgn0036142,FBgn0052076,FBgn0036154,FBgn0036145,FBgn0052082
FBgn0265927	FBgn0052082,FBgn0036145,FBgn0036154,FBgn0052076,FBgn0036142,FBgn0064766,FBgn0036143,FBgn0036146,FBgn0261553,FBgn0036147,FBgn0061469,FBgn0036152,FBgn0036144,FBgn0036153,FBgn0036139,FBgn0036141,FBgn0036150,FBgn0041094
FBgn0265928	FBgn0036144,FBgn0061469,FBgn0036152,FBgn0036147,FBgn0261553,FBgn0041094,FBgn0036141,FBgn0036150,FBgn0036153,FBgn0036139,FBgn0036145,FBgn0052082,FBgn0036146,FBgn0064766,FBgn0036142,FBgn0036143,FBgn0036154,FBgn0052076
FBgn0265929	FBgn0036146,FBgn0052076,FBgn0036154,FBgn0036143,FBgn0036142,FBgn0064766,FBgn0036145,FBgn0052082,FBgn0041094,FBgn0036139,FBgn0036153,FBgn0036150,FBgn0036141,FBgn0036152,FBgn0061469,FBgn0036144,FBgn0261553,FBgn0036147
FBgn0265930	FBgn0036147,FBgn0261553,FBgn0036144,FBgn0061469,FBgn0036152,FBgn0036141,FBgn0036150,FBgn0036153,FBgn0036139,FBgn0041094,FBgn0052082,FBgn0036145,FBgn0064766,FBgn0036142,FBgn0036143,FBgn0036154,FBgn0052076,FBgn0036146
FBgn0265931	FBgn0036155,FBgn0036147,FBgn0261553,FBgn0036144,FBgn0036152,FBgn0061469,FBgn0036145,FBgn0036150,FBgn0036143,FBgn0064766,FBgn0036153,FBgn0036154,FBgn0036146,FBgn0041094
FBgn0265932	FBgn0036150,FBgn0036154,FBgn0036153,FBgn0041094,FBgn0265469,FBgn0036155,FBgn0261553,FBgn0036152,FBgn0036156
FBgn0265933	FBgn0265469,FBgn0041094,FBgn0036150,FBgn0036153,FBgn0036154,FBgn0036156,FBgn0036152,FBgn0036155,FBgn0261553
FBgn0265934	FBgn0041094,FBgn0265469,FBgn0036153,FBgn0036154,FBgn0036150,FBgn0036156,FBgn0036152,FBgn0261553,FBgn0036155
FBgn0265938	FBgn0034636,FBgn0034642,FBgn0003731,FBgn0043070,FBgn0034639,FBgn0069056,FBgn0000326,FBgn0053225,FBgn0010415,FBgn0016641,FBgn0260477,FBgn0026369,FBgn0034641,FBgn0010470,FBgn0034631,FBgn0050286,FBgn0042180,FBgn0050288,FBgn0034634,Novel000071,FBgn0034638,FBgn0050289,FBgn0050287,FBgn0050222
FBgn0265939	FBgn0028847,FBgn0028546,FBgn0028527,FBgn0028848,FBgn0051814,FBgn0259984,FBgn0023407,FBgn0028513,FBgn0051813,FBgn0028941
FBgn0265940	FBgn0028916,FBgn0263037,FBgn0261529,FBgn0261563,FBgn0028906,FBgn0016930,FBgn0052971,FBgn0263038
FBgn0265941	FBgn0261563,FBgn0028906,FBgn0052971,FBgn0016930,FBgn0263038,FBgn0028916,FBgn0261529,FBgn0263037
FBgn0265942	FBgn0264253,FBgn0015546,FBgn0028531,FBgn0261529,FBgn0261563,FBgn0001970,FBgn0052971,FBgn0261534,Novel000018,FBgn0028916,FBgn0028530,FBgn0261535,Novel000038,FBgn0262354,FBgn0016930,FBgn0263038,FBgn0015791
FBgn0265943	FBgn0250844,Novel000038,FBgn0001970,FBgn0015791,FBgn0028871,FBgn0053648,FBgn0005771,FBgn0028844,FBgn0004858,FBgn0015546,FBgn0264810,FBgn0020258
FBgn0265944	FBgn0250844,FBgn0028913,FBgn0005771,FBgn0053648,FBgn0028871,FBgn0028844,FBgn0004858,FBgn0264810
FBgn0265945	FBgn0028844,FBgn0028531,FBgn0004858,FBgn0015546,FBgn0264253,FBgn0261529,FBgn0264810,FBgn0001970,Novel000018,FBgn0005771,FBgn0028871,FBgn0261534,FBgn0020258,FBgn0028916,Novel000038,FBgn0028530,FBgn0261535,FBgn0015791,FBgn0053648,FBgn0262354
FBgn0265946	FBgn0001970,FBgn0261563,FBgn0261534,FBgn0028871,FBgn0005771,Novel000018,FBgn0015546,FBgn0264253,FBgn0004858,FBgn0028844,FBgn0028531,FBgn0264810,FBgn0261529,FBgn0261535,FBgn0028530,Novel000038,FBgn0262354,FBgn0015791,FBgn0020258,FBgn0028916
FBgn0265947	FBgn0028515,FBgn0028897,FBgn0028884,FBgn0262000,FBgn0001992,FBgn0085197,FBgn0024734,FBgn0028520,FBgn0002673,FBgn0001991,FBgn0261999,FBgn0028896,FBgn0032582,FBgn0028893,FBgn0040079,FBgn0001994
FBgn0265948	FBgn0001994,FBgn0040079,FBgn0032582,FBgn0028893,FBgn0028896,FBgn0002673,FBgn0001991,FBgn0261999,FBgn0028375,FBgn0028520,FBgn0024734,FBgn0028897,FBgn0028515,FBgn0085197,FBgn0001992,FBgn0262000,FBgn0028884
FBgn0265949	FBgn0028375,FBgn0024734,FBgn0028897,FBgn0028894,FBgn0028515,FBgn0028895,FBgn0001992,FBgn0085197,FBgn0028884,FBgn0262000,FBgn0001994,FBgn0040079,FBgn0032582,FBgn0028893,FBgn0028525,FBgn0002673,FBgn0001991,FBgn0261999,FBgn0028896
FBgn0265950	FBgn0032719,FBgn0015808,FBgn0032725,FBgn0040992,FBgn0032721,FBgn0032727,FBgn0046302,FBgn0260228,FBgn0032723,FBgn0032731,FBgn0032732,FBgn0032717,FBgn0032713,FBgn0032733,FBgn0053120,FBgn0032734,FBgn0032724,FBgn0032726,FBgn0027070,FBgn0015772,FBgn0003896,FBgn0051752,FBgn0040993,FBgn0032729,FBgn0032715,FBgn0032720,FBgn0032730,FBgn0264362,FBgn0259201,FBgn0032728,FBgn0027074
FBgn0265951	FBgn0032723,FBgn0032721,FBgn0032731,FBgn0032733,FBgn0032713,FBgn0015772,FBgn0051792,FBgn0003896,FBgn0032724,FBgn0032734,FBgn0032729,FBgn0051793,FBgn0032720,FBgn0040992,FBgn0032719,FBgn0015808,FBgn0032725,FBgn0260228,FBgn0046302,FBgn0032727,FBgn0032717,FBgn0032732,FBgn0027070,FBgn0053120,FBgn0032726,FBgn0051752,FBgn0040993,FBgn0032715,FBgn0032730,FBgn0259201,FBgn0027074,FBgn0032728
FBgn0265952	FBgn0032715,FBgn0040993,FBgn0051752,FBgn0027070,FBgn0032726,FBgn0053120,FBgn0027074,FBgn0032728,FBgn0259201,FBgn0264362,FBgn0032730,FBgn0046302,FBgn0032727,FBgn0260228,FBgn0040992,FBgn0015808,FBgn0032725,FBgn0032719,FBgn0032732,FBgn0032717,FBgn0032729,FBgn0003896,FBgn0051792,FBgn0015772,FBgn0032734,FBgn0032724,FBgn0032720,FBgn0032723,FBgn0032721,FBgn0032733,FBgn0032713,FBgn0032731
FBgn0265953	FBgn0001202,FBgn0032741,FBgn0032728,FBgn0086710,FBgn0032730,FBgn0032720,FBgn0051793,FBgn0032729,FBgn0032726,FBgn0032734,FBgn0032724,FBgn0003896,FBgn0051792,FBgn0015772,FBgn0032732,FBgn0086442,FBgn0028569,FBgn0032733,FBgn0032740,FBgn0263198,FBgn0032744,FBgn0002022,FBgn0032731,FBgn0032721,FBgn0051800,FBgn0032723,FBgn0046302,FBgn0032727,FBgn0032725,FBgn0032719
FBgn0265954	FBgn0032732,FBgn0002021,FBgn0032744,FBgn0002022,FBgn0032727,FBgn0046302,FBgn0032725,FBgn0032719,FBgn0032748,FBgn0001202,FBgn0086710,FBgn0032728,FBgn0032730,FBgn0032726,FBgn0028569,FBgn0086442,FBgn0032740,FBgn0032733,FBgn0263198,FBgn0032746,FBgn0032731,FBgn0032721,FBgn0051800,FBgn0032723,FBgn0032741,FBgn0032720,FBgn0051793,FBgn0032729,FBgn0032724,FBgn0032734,FBgn0051792,FBgn0261396,FBgn0003896,FBg…
FBgn0265955	FBgn0031690,FBgn0031696,FBgn0031698,FBgn0031702,FBgn0015031,FBgn0031695,FBgn0250847,FBgn0031694,FBgn0031697,FBgn0261836,FBgn0031701,FBgn0003716,FBgn0031700,FBgn0031693,FBgn0016920,FBgn0031692,FBgn0016076,FBgn0031688,FBgn0000228,FBgn0031689,FBgn0031703
FBgn0265956	FBgn0031703,FBgn0031688,FBgn0016076,FBgn0031689,FBgn0000228,FBgn0031693,FBgn0031692,FBgn0016920,FBgn0003716,FBgn0031701,FBgn0031700,FBgn0031694,FBgn0250847,FBgn0261836,FBgn0031697,FBgn0015031,FBgn0031695,FBgn0031698,FBgn0031690,FBgn0031696,FBgn0031702
FBgn0265957	FBgn0031694,FBgn0250847,FBgn0261836,FBgn0031697,FBgn0003716,FBgn0031701,FBgn0031700,FBgn0031698,FBgn0031690,FBgn0031696,FBgn0031702,FBgn0015031,FBgn0031695,FBgn0031703,FBgn0031693,FBgn0031692,FBgn0016920,FBgn0031688,FBgn0016076,FBgn0000228,FBgn0031689
FBgn0265958	FBgn0031700,FBgn0031701,FBgn0031703,FBgn0261963,FBgn0031697,FBgn0015031,FBgn0016076,FBgn0016920,FBgn0031702,FBgn0016660,FBgn0031698
FBgn0265960	FBgn0002985,FBgn0024244,FBgn0031554,FBgn0051956,FBgn0031540,FBgn0005616,FBgn0261560,FBgn0000721,FBgn0014396,FBgn0085369,FBgn0015663,FBgn0031550,FBgn0021967,FBgn0031546,FBgn0031542,FBgn0264363,FBgn0031544,FBgn0031549,FBgn0031545,FBgn0031548,FBgn0053123,FBgn0051954,FBgn0004892,FBgn0051776,FBgn0031547
FBgn0265961	FBgn0034641,FBgn0259710,FBgn0050263,FBgn0016641,FBgn0034650,FBgn0000326,FBgn0034657,FBgn0259711,FBgn0034642,FBgn0003687,FBgn0259726,FBgn0010228,FBgn0050222,FBgn0034643,FBgn0260223,FBgn0034638,FBgn0042180,FBgn0034658,FBgn0266346,FBgn0259727,FBgn0050404,FBgn0034645,FBgn0034647,FBgn0034655,FBgn0050290,FBgn0050284,FBgn0034651,FBgn0053225,FBgn0050398,FBgn0050403,FBgn0034639,FBgn0034654,FBgn0034636,FBg…
FBgn0265962	FBgn0260223,FBgn0010228,FBgn0034643,FBgn0042180,FBgn0034658,FBgn0085233,FBgn0266346,FBgn0034647,FBgn0264714,FBgn0050404,FBgn0259727,FBgn0034645,FBgn0034641,FBgn0016641,FBgn0034650,FBgn0259710,FBgn0050263,FBgn0259711,FBgn0034660,FBgn0000326,FBgn0034657,FBgn0259726,FBgn0034661,FBgn0003687,FBgn0034642,FBgn0034649,FBgn0259709,FBgn0034659,FBgn0034646,FBgn0034644,FBgn0050285,FBgn0050395,FBgn0027360,FBg…
FBgn0265963	FBgn0034661,FBgn0259726,FBgn0034642,FBgn0003687,FBgn0034660,FBgn0259711,FBgn0034657,FBgn0034650,FBgn0050263,FBgn0259710,FBgn0034641,FBgn0034647,FBgn0034645,FBgn0264714,FBgn0050404,FBgn0259727,FBgn0085233,FBgn0266346,FBgn0034662,FBgn0034658,FBgn0260223,FBgn0034643,FBgn0010228,FBgn0004362,FBgn0259708,FBgn0034654,FBgn0050403,FBgn0050398,FBgn0050284,FBgn0034651,FBgn0050290,FBgn0042098,FBgn0034655,FBg…
FBgn0265964	FBgn0000137,FBgn0040371,FBgn0266572,FBgn0011822,FBgn0029522,FBgn0262811,FBgn0029521,FBgn0024989,FBgn0040370,FBgn0002561,FBgn0052816,FBgn0262810,FBgn0004170,FBgn0010019,FBgn0000022,FBgn0004034,FBgn0005427
FBgn0265966	FBgn0000137,FBgn0040371,FBgn0266572,FBgn0052817,FBgn0023537,FBgn0011822,FBgn0023536,FBgn0262811,FBgn0029522,FBgn0024989,FBgn0029521,FBgn0040370,FBgn0002561,FBgn0052816,FBgn0262810,FBgn0029524,FBgn0004170,FBgn0010019,FBgn0000022,FBgn0004034,FBgn0029525
FBgn0265967	FBgn0030797,FBgn0053252,FBgn0030792,FBgn0030798,FBgn0030803,FBgn0030802,FBgn0030801,Novel000236,FBgn0030793,FBgn0030805,FBgn0030800,FBgn0030799,FBgn0030795,FBgn0030804,FBgn0024941,FBgn0030807,FBgn0030808,FBgn0030796,FBgn0030794,FBgn0030809,FBgn0027556,FBgn0030806,FBgn0266354
FBgn0265976	FBgn0085237,FBgn0085236,FBgn0013272,FBgn0034708,FBgn0034720,FBgn0034709,FBgn0016053,FBgn0020307,FBgn0034718,FBgn0034700,FBgn0034706,FBgn0034717,FBgn0000008,FBgn0050277,FBgn0034715,FBgn0034711,FBgn0034707,FBgn0029084,FBgn0034704,FBgn0050278,FBgn0034710,FBgn0025186,FBgn0034713,FBgn0034703,FBgn0034705,FBgn0034716,FBgn0034712,FBgn0017482,FBgn0085235
FBgn0265977	FBgn0022986,FBgn0034716,FBgn0053200,FBgn0017482,FBgn0034724,FBgn0022985,FBgn0022984,FBgn0020307,FBgn0034722,FBgn0034718,FBgn0034717,FBgn0085237,FBgn0013272,FBgn0085236,FBgn0034720,FBgn0016053,FBgn0034726,FBgn0034715,FBgn0034721,FBgn0034723,FBgn0034727,FBgn0034725,FBgn0050277,FBgn0025878
FBgn0265978	FBgn0017482,FBgn0266433,FBgn0053200,FBgn0266432,FBgn0034724,FBgn0034734,FBgn0022985,FBgn0022984,FBgn0022986,FBgn0034728,FBgn0034723,FBgn0034721,FBgn0034726,FBgn0034730,FBgn0034725,FBgn0034727,FBgn0025878,FBgn0034733,FBgn0034718,FBgn0034722,FBgn0034717,FBgn0016053,FBgn0034731,FBgn0034729,FBgn0085237,FBgn0013272,FBgn0085236,FBgn0034720
FBgn0265979	FBgn0016053,FBgn0034720,FBgn0085237,FBgn0013272,FBgn0085236,FBgn0034717,FBgn0034718,FBgn0034722,FBgn0020307,FBgn0034725,FBgn0050277,FBgn0025878,FBgn0034723,FBgn0034721,FBgn0050278,FBgn0034726,FBgn0034715,FBgn0022986,FBgn0025186,FBgn0022984,FBgn0022985,FBgn0034724,FBgn0017482,FBgn0053200,FBgn0034716
FBgn0265980	FBgn0034717,FBgn0034718,FBgn0034722,FBgn0020307,FBgn0016053,FBgn0034731,FBgn0034720,FBgn0085236,FBgn0034729,FBgn0085237,FBgn0013272,FBgn0034723,FBgn0034721,FBgn0034726,FBgn0025878,FBgn0034730,FBgn0034727,FBgn0034725,FBgn0022986,FBgn0034728,FBgn0017482,FBgn0053200,FBgn0266432,FBgn0022984,FBgn0022985,FBgn0034724
FBgn0265981	FBgn0022986,FBgn0034728,FBgn0034735,FBgn0017482,FBgn0003175,FBgn0266433,FBgn0053200,FBgn0266432,FBgn0034724,FBgn0022985,FBgn0034734,FBgn0022984,FBgn0034718,FBgn0034722,FBgn0016053,FBgn0034731,FBgn0034729,FBgn0085236,FBgn0085237,FBgn0013272,FBgn0034720,FBgn0034721,FBgn0034723,FBgn0034726,FBgn0034730,FBgn0034725,FBgn0034727,FBgn0025878,FBgn0034733
FBgn0265982	FBgn0034741,FBgn0019949,FBgn0040091,FBgn0050275,FBgn0260768,FBgn0053143,FBgn0050196,FBgn0034743,FBgn0263030,FBgn0085475,FBgn0260767,FBgn0085474,FBgn0050273,FBgn0034774,FBgn0026261,FBgn0034761,FBgn0005631,FBgn0034763,FBgn0034739,FBgn0050268,FBgn0040658,FBgn0034745,FBgn0034756,FBgn0020257,FBgn0262141,FBgn0034769,FBgn0050269,FBgn0034768,FBgn0260866,FBgn0050259,FBgn0261596,FBgn0050195,FBgn0034770,FBg…
FBgn0265983	FBgn0034761,FBgn0026261,FBgn0050273,FBgn0034774,FBgn0085475,FBgn0260767,FBgn0085474,FBgn0050196,FBgn0034743,FBgn0053143,FBgn0260768,FBgn0263030,FBgn0050275,FBgn0019949,FBgn0061435,FBgn0040091,FBgn0034741,FBgn0034776,FBgn0263031,FBgn0034755,Novel000072,FBgn0259145,FBgn0034758,FBgn0034766,FBgn0034759,FBgn0034740,FBgn0034742,FBgn0034744,FBgn0034748,FBgn0034753,FBgn0034750,FBgn0034770,FBgn0034768,FBg…
FBgn0265984	FBgn0034756,FBgn0034745,FBgn0040658,FBgn0050268,FBgn0034739,FBgn0034763,FBgn0005631,FBgn0259145,Novel000072,FBgn0034758,FBgn0034776,FBgn0034755,FBgn0263031,FBgn0034742,FBgn0034744,FBgn0034748,FBgn0034753,FBgn0034759,FBgn0034766,FBgn0034740,FBgn0028371,FBgn0034770,FBgn0034750,FBgn0034768,FBgn0050259,FBgn0050195,FBgn0260866,FBgn0261596,FBgn0050269,FBgn0034769,FBgn0262141,FBgn0020257,FBgn0263030,FBg…
FBgn0265985	FBgn0050196,FBgn0034743,FBgn0260768,FBgn0053143,FBgn0263030,FBgn0050275,FBgn0019949,FBgn0061435,FBgn0040091,FBgn0034741,FBgn0034761,FBgn0026261,FBgn0050273,FBgn0034774,FBgn0085475,FBgn0260767,FBgn0085474,FBgn0040658,FBgn0034745,FBgn0034756,FBgn0034739,FBgn0050268,FBgn0005631,FBgn0034763,FBgn0034776,FBgn0263031,FBgn0034755,Novel000072,FBgn0259145,FBgn0034758,FBgn0034759,FBgn0034766,FBgn0034740,FBg…
FBgn0265986	FBgn0028686,FBgn0030271,FBgn0030276,FBgn0027498,FBgn0261277,FBgn0030278,FBgn0030269,FBgn0020255,FBgn0030280,FBgn0259101,FBgn0015245,FBgn0030277,FBgn0265595,FBgn0030283,FBgn0030266,FBgn0052667,FBgn0030270,FBgn0030272,FBgn0265535,FBgn0052668,FBgn0030268,FBgn0010391,FBgn0030274,FBgn0026268
FBgn0265987	FBgn0003360,FBgn0025111,FBgn0003321,FBgn0030228,FBgn0052675,FBgn0052669,FBgn0030230,FBgn0030224,FBgn0052676,FBgn0052672,FBgn0030234,FBgn0052673,FBgn0052677,FBgn0030237,FBgn0262735,FBgn0030223,FBgn0003204,FBgn0040850
FBgn0265992	FBgn0040989,FBgn0032656,FBgn0051742,FBgn0261358,FBgn0262960,FBgn0032660,FBgn0243486,FBgn0000120,FBgn0261357,FBgn0051740,FBgn0261531,FBgn0032663,FBgn0032658,FBgn0023096,FBgn0051741,FBgn0002939
FBgn0265993	FBgn0032698,FBgn0032703,FBgn0032707,FBgn0032706,FBgn0032713,FBgn0005617,FBgn0263079,FBgn0015553,FBgn0032702,FBgn0032699,FBgn0261806,FBgn0260228,FBgn0032693,FBgn0261349,FBgn0040992,FBgn0015808,FBgn0032709,FBgn0032700,FBgn0086909,FBgn0045852,FBgn0032705,FBgn0032715,FBgn0040993,FBgn0263078,FBgn0025608,FBgn0027070,FBgn0032704,FBgn0027074,FBgn0259201,FBgn0032694,FBgn0086681,FBgn0264362,FBgn0032701
FBgn0265994	FBgn0015808,FBgn0040992,FBgn0261349,FBgn0032693,FBgn0260228,FBgn0032705,FBgn0086909,FBgn0045852,FBgn0032700,FBgn0032717,FBgn0032709,FBgn0032704,FBgn0027070,FBgn0025608,FBgn0263078,FBgn0032715,FBgn0040993,FBgn0264362,FBgn0086681,FBgn0032701,FBgn0032694,FBgn0259201,FBgn0027074,FBgn0032707,FBgn0032703,FBgn0032698,FBgn0005617,FBgn0032713,FBgn0032706,FBgn0032702,FBgn0015553,FBgn0263079,FBgn0261806,FBg…
FBgn0265995	FBgn0024183,FBgn0259965,FBgn0010422,FBgn0028878,FBgn0262526,FBgn0028516,FBgn0259982,FBgn0028862,FBgn0045842,FBgn0262875,FBgn0028879,FBgn0001978,FBgn0027559,FBgn0028888
FBgn0265996	FBgn0028516,FBgn0259982,FBgn0028862,FBgn0010422,FBgn0028878,FBgn0259965,FBgn0024183,FBgn0262526,FBgn0028879,FBgn0028888,FBgn0027559,FBgn0001978,FBgn0262875,FBgn0045842
FBgn0265997	FBgn0031467,FBgn0031473,FBgn0031452,FBgn0031462,FBgn0031470,FBgn0051690,FBgn0031460,FBgn0031450,FBgn0031444,FBgn0031453,FBgn0250906,FBgn0031455,FBgn0031463,FBgn0031458,FBgn0031456,FBgn0004242,FBgn0026324,FBgn0031464,FBgn0031459,FBgn0041248,FBgn0031446,FBgn0031471,FBgn0019830,FBgn0031472,FBgn0031461,FBgn0031474,FBgn0031451,FBgn0031469,FBgn0031468,FBgn0031454,FBgn0031466,FBgn0028398,FBgn0031449,FBg…
FBgn0265999	FBgn0031774,FBgn0085208,FBgn0031771,FBgn0031769,FBgn0261683,FBgn0085409,FBgn0001170,FBgn0025742,FBgn0051642,FBgn0031776,FBgn0051643,FBgn0031784,FBgn0031764,FBgn0266450,FBgn0031772,FBgn0031785,FBgn0031770,FBgn0031765,FBgn0031766,FBgn0085209,FBgn0051639,FBgn0031775,FBgn0031777,FBgn0031773,FBgn0031759,FBgn0000308,FBgn0266449,FBgn0266445,FBgn0029161,FBgn0001089,FBgn0031779,FBgn0001942,FBgn0031786,FBg…
FBgn0266001	FBgn0263916,FBgn0031815,FBgn0027496,FBgn0031820,FBgn0031835,FBgn0259714,FBgn0031824,FBgn0051638,FBgn0031831,FBgn0263278,FBgn0031813,FBgn0031818,FBgn0031834,FBgn0011722,FBgn0259749,FBgn0086357,FBgn0031811,FBgn0031830,FBgn0031816,FBgn0000320,FBgn0031822,FBgn0031829,FBgn0031821,FBgn0031817,FBgn0031814,FBgn0031826,FBgn0051637,FBgn0031832
FBgn0266002	FBgn0259749,FBgn0031837,FBgn0031834,FBgn0031818,FBgn0085374,FBgn0051638,FBgn0031824,FBgn0031831,FBgn0263916,FBgn0031815,FBgn0027496,FBgn0031820,FBgn0031835,FBgn0051634,FBgn0031842,FBgn0031814,FBgn0031826,FBgn0051637,FBgn0051635,FBgn0031832,FBgn0031836,FBgn0031817,FBgn0031829,FBgn0031822,FBgn0031821,FBgn0031816,FBgn0000320,FBgn0086357,FBgn0031830
FBgn0266003	FBgn0031799,FBgn0260452,FBgn0053531,FBgn0031805,FBgn0031814,FBgn0264543,FBgn0031804,FBgn0259715,FBgn0031811,FBgn0031801,FBgn0031816,FBgn0043854,FBgn0031792,FBgn0031813,FBgn0011722,FBgn0265778,FBgn0031803,FBgn0031800,FBgn0031815,FBgn0015623,FBgn0259716,FBgn0259714,FBgn0263278,FBgn0031802,FBgn0031808
FBgn0266004	FBgn0263278,FBgn0031802,FBgn0031808,FBgn0259714,FBgn0259716,FBgn0015623,FBgn0031800,FBgn0031815,FBgn0031803,FBgn0265778,FBgn0011722,FBgn0031813,FBgn0031792,FBgn0031816,FBgn0043854,FBgn0031801,FBgn0031811,FBgn0259715,FBgn0031804,FBgn0264543,FBgn0031814,FBgn0031805,FBgn0260452,FBgn0053531,FBgn0031799
FBgn0266005	FBgn0026143,FBgn0040363,FBgn0085349,FBgn0040351,FBgn0040338,FBgn0052814,FBgn0040362,FBgn0053082,FBgn0040398,FBgn0040368,FBgn0040361,FBgn0042146,FBgn0003638,FBgn0040349,FBgn0040365,FBgn0266569,FBgn0040360,FBgn0029552,FBgn0040364,FBgn0040397,FBgn0014903,FBgn0040337,FBgn0040350
FBgn0266007	FBgn0052834,FBgn0261564,FBgn0034808,FBgn0001263,FBgn0265187,FBgn0034803,FBgn0034793,FBgn0034802,FBgn0050187,FBgn0004896,FBgn0034804,FBgn0052833,FBgn0034796,FBgn0003900,FBgn0261584,FBgn0034795,FBgn0034797,FBgn0261705,FBgn0034788,FBgn0034807,FBgn0267823,FBgn0034789,FBgn0010660,FBgn0034800,FBgn0034792,FBgn0034791
FBgn0266008	FBgn0034834,FBgn0045483,FBgn0034825,FBgn0034827,FBgn0261614,FBgn0021979,FBgn0045482,FBgn0034821,FBgn0041236,FBgn0003900,FBgn0263707,FBgn0261705,FBgn0261363,FBgn0265187,FBgn0034828,FBgn0262843,FBgn0034822,FBgn0034814,FBgn0041235,FBgn0034824,FBgn0034829,FBgn0034826,FBgn0265188,FBgn0034820,FBgn0085400,FBgn0034819,FBgn0034833,FBgn0034817,FBgn0034816,FBgn0003062,FBgn0050192,FBgn0010622
FBgn0266009	FBgn0034816,FBgn0003062,FBgn0050192,FBgn0010622,FBgn0034819,FBgn0034833,FBgn0034817,FBgn0034826,FBgn0265188,FBgn0034820,FBgn0085400,FBgn0262843,FBgn0034822,FBgn0034828,FBgn0265187,FBgn0034814,FBgn0041235,FBgn0034829,FBgn0034824,FBgn0034821,FBgn0003900,FBgn0041236,FBgn0263707,FBgn0261705,FBgn0261363,FBgn0045482,FBgn0021979,FBgn0261614,FBgn0045483,FBgn0034834,FBgn0034827,FBgn0034825
FBgn0266010	FBgn0034838,FBgn0085453,FBgn0250838,FBgn0050409,FBgn0034839,FBgn0034850,FBgn0050412,FBgn0034844,FBgn0085400,FBgn0050416,FBgn0050410,FBgn0034853,FBgn0034856,FBgn0085452,FBgn0040660,FBgn0003009,FBgn0050417,FBgn0034842,FBgn0034846,FBgn0085239,FBgn0050414,FBgn0034849,FBgn0040063,FBgn0034858,FBgn0046253,FBgn0034835,Novel000073,FBgn0041712,FBgn0050413,FBgn0263084,FBgn0028497,FBgn0034841,FBgn0003977,FBg…
FBgn0266011	FBgn0050411,FBgn0050409,FBgn0085453,FBgn0034861,FBgn0250838,FBgn0034844,FBgn0034863,FBgn0034850,FBgn0050412,FBgn0085452,FBgn0034856,FBgn0034853,FBgn0040660,FBgn0026384,FBgn0050416,FBgn0034866,FBgn0050410,FBgn0050417,FBgn0034842,FBgn0034860,FBgn0034858,FBgn0046253,FBgn0034849,FBgn0034867,FBgn0041712,FBgn0034859,FBgn0085239,FBgn0034846,FBgn0050414,FBgn0050413,FBgn0264339,FBgn0003977,FBgn0263084,FBg…
FBgn0266020	FBgn0053803,FBgn0032943,FBgn0023091,FBgn0264556,FBgn0051626,FBgn0023090,FBgn0053910,FBgn0032946,FBgn0032940,FBgn0032938,FBgn0032935,FBgn0053801,FBgn0261239,FBgn0053909,FBgn0032945,FBgn0021856,FBgn0000370,FBgn0041245,FBgn0026577
FBgn0266021	FBgn0051612,FBgn0051600,FBgn0086779,FBgn0003866,FBgn0032966,FBgn0032968,FBgn0051619,FBgn0032961,FBgn0032964,FBgn0032965,FBgn0032967
FBgn0266022	FBgn0054049,FBgn0031412,FBgn0031399,FBgn0051949,FBgn0052463,FBgn0031409,FBgn0051682,FBgn0262126,FBgn0028570,FBgn0042186,FBgn0053124,FBgn0085203,FBgn0031406,FBgn0011832,FBgn0051681,FBgn0031401,FBgn0085201,FBgn0264979,FBgn0031407,FBgn0250841,FBgn0031403,FBgn0010288,FBgn0261523,FBgn0031410,FBgn0031397,FBgn0051679,FBgn0040715,FBgn0031398,FBgn0031413,FBgn0051668,FBgn0031395,FBgn0031414,FBgn0259717,FBg…
FBgn0266023	FBgn0042187,FBgn0259717,FBgn0031414,FBgn0031395,FBgn0267378,FBgn0000097,FBgn0031398,FBgn0031413,FBgn0014010,FBgn0051668,FBgn0051679,FBgn0040715,FBgn0031397,FBgn0031410,FBgn0010288,FBgn0031403,FBgn0261523,FBgn0031407,FBgn0250841,FBgn0264979,FBgn0085201,FBgn0031401,FBgn0053124,FBgn0085203,FBgn0031406,FBgn0011832,FBgn0051681,FBgn0028570,FBgn0042186,FBgn0031409,FBgn0051949,FBgn0052463,FBgn0051682,FBg…
FBgn0266024	FBgn0031431,FBgn0264433,FBgn0031441,FBgn0031442,FBgn0031446,FBgn0041248,FBgn0031435,FBgn0041337,FBgn0031432,FBgn0031437,FBgn0263322,FBgn0031436,FBgn0026395,FBgn0053125,FBgn0085343,FBgn0031430,FBgn0051690,FBgn0031443,FBgn0031444,FBgn0026479,FBgn0031440,FBgn0250835,FBgn0026778,FBgn0031434
FBgn0266025	FBgn0053125,FBgn0085343,FBgn0051690,FBgn0031430,FBgn0031443,FBgn0026479,FBgn0031444,FBgn0031440,FBgn0250835,FBgn0026778,FBgn0031434,FBgn0263322,FBgn0031436,FBgn0026395,FBgn0031446,FBgn0031442,FBgn0041248,FBgn0031435,FBgn0041337,FBgn0031432,FBgn0031437,FBgn0011818,FBgn0031431,FBgn0264433,FBgn0031441
FBgn0266026	FBgn0259949,FBgn0051776,FBgn0085423,FBgn0031538,FBgn0266670,FBgn0031519,FBgn0031536,FBgn0259950,FBgn0031542,FBgn0053282,FBgn0031530,FBgn0031523,FBgn0031531,FBgn0031528,FBgn0031520,FBgn0031529,FBgn0031522,FBgn0051956,FBgn0005616,FBgn0031534,FBgn0031533,FBgn0085204,FBgn0016698,FBgn0031515,FBgn0051952,FBgn0031516,FBgn0020445,FBgn0031518,FBgn0021967,FBgn0053281,FBgn0031535,FBgn0031526,FBgn0031517,FBg…
FBgn0266027	FBgn0259950,FBgn0031542,FBgn0053282,FBgn0031531,FBgn0031523,FBgn0031530,FBgn0051956,FBgn0031522,FBgn0031534,FBgn0005616,FBgn0031528,FBgn0031529,FBgn0031520,FBgn0085423,FBgn0259949,FBgn0051776,FBgn0031536,FBgn0266670,FBgn0031538,FBgn0031519,FBgn0021967,FBgn0020445,FBgn0031518,FBgn0053281,FBgn0031535,FBgn0014396,FBgn0031516,FBgn0051952,FBgn0031540,FBgn0261560,FBgn0031526,FBgn0031517,FBgn0085204,FBg…
FBgn0266029	FBgn0031719,FBgn0031707,FBgn0051915,FBgn0031717,FBgn0031708,FBgn0031723,FBgn0051648,Novel000030,FBgn0004620,FBgn0014189,FBgn0031718,FBgn0051989,FBgn0031715,FBgn0031713,FBgn0031722,FBgn0031711,Novel000031,FBgn0000318,FBgn0031721,FBgn0031716,FBgn0051646,FBgn0031728,FBgn0261963,FBgn0031720,FBgn0031725,FBgn0031710,FBgn0031726,FBgn0002525,FBgn0031724,FBgn0020429
FBgn0266030	FBgn0031707,FBgn0014189,FBgn0051989,FBgn0031715,FBgn0031713,FBgn0031711,FBgn0031721,FBgn0031716,FBgn0031729,FBgn0031710,FBgn0031725,FBgn0020429,FBgn0031719,FBgn0051915,FBgn0031717,FBgn0031731,FBgn0031708,FBgn0031723,FBgn0051648,Novel000030,FBgn0004620,FBgn0031718,FBgn0031722,Novel000031,FBgn0000318,FBgn0051646,FBgn0031728,FBgn0031720,FBgn0031726,FBgn0002525,FBgn0031730,FBgn0031724
FBgn0266031	FBgn0054011,FBgn0031718,FBgn0031732,Novel000030,FBgn0004620,FBgn0031723,FBgn0051648,FBgn0031717,FBgn0031708,FBgn0031731,FBgn0051915,FBgn0031719,FBgn0031724,FBgn0031730,FBgn0031726,FBgn0002525,FBgn0031720,FBgn0031728,FBgn0051646,FBgn0031722,FBgn0000318,Novel000031,FBgn0031715,FBgn0031713,FBgn0014189,FBgn0051989,FBgn0020429,FBgn0031710,FBgn0031725,FBgn0031729,FBgn0031721,FBgn0031716,FBgn0031711
FBgn0266032	FBgn0031263,FBgn0031267,FBgn0000497,FBgn0031273,FBgn0040106,FBgn0023489,FBgn0013323,FBgn0031266,FBgn0003963,FBgn0031261,FBgn0031264,FBgn0040107,FBgn0031265,FBgn0021874,Novel000028,FBgn0031270,FBgn0031268,FBgn0260933,FBgn0010602,FBgn0010323,FBgn0005660,FBgn0031260
FBgn0266033	FBgn0010602,FBgn0260933,FBgn0005660,FBgn0010323,FBgn0031260,FBgn0021874,FBgn0040107,FBgn0031265,FBgn0031264,Novel000028,FBgn0031270,FBgn0031268,FBgn0013323,FBgn0031266,FBgn0003963,FBgn0031261,FBgn0031263,FBgn0031273,FBgn0000497,FBgn0031267,FBgn0023489,FBgn0040106
FBgn0266034	FBgn0262880,FBgn0041182,FBgn0031939,FBgn0264895,FBgn0040299,FBgn0053296,FBgn0041181,FBgn0031926,FBgn0260479,FBgn0031925,FBgn0031937,FBgn0264087,FBgn0083141,FBgn0031935,FBgn0031936,FBgn0031929,FBgn0031930,FBgn0267326
FBgn0266035	FBgn0267326,FBgn0031930,FBgn0031929,FBgn0031935,FBgn0031936,FBgn0083141,FBgn0264087,FBgn0031937,FBgn0031925,FBgn0260479,FBgn0031926,FBgn0041181,FBgn0053296,FBgn0040299,FBgn0264895,FBgn0031939,FBgn0041182,FBgn0262880
FBgn0266036	FBgn0046113,FBgn0031299,FBgn0031296,FBgn0015905,FBgn0031298,FBgn0031295,FBgn0031294,FBgn0002563,FBgn0003310,FBgn0028481
FBgn0266037	FBgn0032111,FBgn0010314,FBgn0267252,FBgn0040097,FBgn0000640,FBgn0032104,FBgn0002973,FBgn0263082,FBgn0032116,FBgn0026439,FBgn0085210,FBgn0085395,FBgn0032110,FBgn0032117,FBgn0262036,FBgn0032119,FBgn0085211,FBgn0032105,FBgn0053723,FBgn0032109,FBgn0032115,FBgn0011232,FBgn0012036
FBgn0266038	FBgn0085202,FBgn0084001,FBgn0051601,FBgn0051600,FBgn0032965,FBgn0051693,FBgn0032968,FBgn0032966,FBgn0032967,FBgn0028979,FBgn0032969
FBgn0266039	FBgn0085202,FBgn0084001,FBgn0051600,FBgn0051601,FBgn0051693,FBgn0032965,FBgn0032968,FBgn0032966,FBgn0032969,FBgn0032967,FBgn0028979
FBgn0266040	FBgn0034903,FBgn0034919,FBgn0023477,FBgn0034907,FBgn0034920,FBgn0263006,FBgn0025352,FBgn0034908,FBgn0261794,FBgn0015268,FBgn0034921,FBgn0034901,FBgn0010278,FBgn0034924,FBgn0034899,FBgn0034923,FBgn0034918,FBgn0050177,FBgn0034900,FBgn0034910,FBgn0000562,FBgn0028411,FBgn0034913,FBgn0034928,FBgn0025334,FBgn0083941,FBgn0025336,FBgn0034902,FBgn0025790,FBgn0021895,FBgn0034933,FBgn0003401,FBgn0034915,FBg…
FBgn0266043	FBgn0004507,FBgn0259192,FBgn0031384,FBgn0040718,FBgn0053543,FBgn0000097,FBgn0259230,FBgn0043539,FBgn0031388,FBgn0001125,FBgn0031393,FBgn0026396,FBgn0053516,FBgn0003557,FBgn0031389,FBgn0031392,FBgn0028952,FBgn0031379,FBgn0027509,FBgn0031381,FBgn0031390,FBgn0031391,FBgn0040717,FBgn0031378
FBgn0266044	FBgn0032974,FBgn0032981,FBgn0051703,FBgn0032973,FBgn0259683,FBgn0032987,FBgn0025674,FBgn0040519,FBgn0032988,FBgn0032979,FBgn0032972,FBgn0261802,FBgn0051702,FBgn0032986,Novel000042,FBgn0032971,FBgn0083973
FBgn0266045	FBgn0034996,FBgn0050418,FBgn0003888,FBgn0035000,FBgn0034997,FBgn0010414,FBgn0000037,FBgn0004101,FBgn0005638,FBgn0034999,FBgn0035001,FBgn0034998,FBgn0002787,FBgn0034994,FBgn0259210,FBgn0005636,FBgn0266439,FBgn0259729,FBgn0035003,FBgn0266047,FBgn0050419,FBgn0266438
FBgn0266046	FBgn0005638,FBgn0004101,FBgn0000037,FBgn0035010,FBgn0034997,FBgn0010414,FBgn0050418,FBgn0034996,FBgn0035006,FBgn0035000,FBgn0003888,FBgn0266047,FBgn0266438,FBgn0035005,FBgn0266439,FBgn0035003,FBgn0259729,FBgn0259210,FBgn0035004,FBgn0005636,FBgn0035001,FBgn0034999,FBgn0002787,FBgn0034998
FBgn0266048	FBgn0000037,FBgn0035009,FBgn0004101,FBgn0005638,FBgn0035007,FBgn0035010,FBgn0010414,FBgn0035008,FBgn0035006,FBgn0035000,FBgn0003888,FBgn0266047,FBgn0035005,FBgn0266438,FBgn0266439,FBgn0259729,FBgn0035003,FBgn0259210,FBgn0035004,FBgn0005636,FBgn0035001,FBgn0034999,FBgn0002787
FBgn0266049	FBgn0013764,FBgn0260775,FBgn0264299,FBgn0005612,FBgn0085242,FBgn0050178,FBgn0023081,FBgn0259209,FBgn0019948,FBgn0034964,FBgn0061198,FBgn0034965,FBgn0028552,FBgn0011695,FBgn0264297,FBgn0041706,FBgn0034972,FBgn0034946,FBgn0034970,FBgn0034943,FBgn0034957,FBgn0034945,FBgn0015544,FBgn0034963,FBgn0034973,FBgn0022708,FBgn0034961,FBgn0034942,FBgn0034950,FBgn0034974,FBgn0053519,FBgn0034966,FBgn0260770,FBg…
FBgn0266051	FBgn0029868,FBgn0029860,FBgn0053669,FBgn0029863,FBgn0003139,FBgn0250869,FBgn0026015,FBgn0029859,FBgn0261955,FBgn0029858,FBgn0029866,FBgn0029861,FBgn0043796,FBgn0029856,FBgn0259242,FBgn0028685,FBgn0003655,FBgn0028982,FBgn0029864,FBgn0029870,FBgn0086558,FBgn0029857,FBgn0053664,FBgn0029854,FBgn0053668,FBgn0029867
FBgn0266052	FBgn0029885,FBgn0025815,FBgn0029879,FBgn0029880,FBgn0029896,FBgn0029882,FBgn0029888,FBgn0029893,FBgn0028360,FBgn0029878,FBgn0029891,FBgn0062413,FBgn0265362,FBgn0029894,FBgn0029895,FBgn0029892,FBgn0029887,FBgn0000524,FBgn0028336,FBgn0085446,FBgn0029890,FBgn0029877,FBgn0029881
FBgn0266068	FBgn0031736,FBgn0031731,FBgn0031723,FBgn0031732,FBgn0054011,FBgn0031722,FBgn0024191,FBgn0051646,FBgn0031728,FBgn0031735,FBgn0031729,FBgn0031733,FBgn0031725,FBgn0031726,FBgn0031734,FBgn0031730,FBgn0031724,FBgn0020429
FBgn0266070	FBgn0031785,FBgn0026755,FBgn0031784,FBgn0051639,FBgn0040950,FBgn0031786,FBgn0031792,FBgn0260452,FBgn0053531,FBgn0031791,FBgn0265778,FBgn0264543,FBgn0085409
FBgn0266071	FBgn0051642,FBgn0031776,FBgn0051643,FBgn0031784,FBgn0031772,FBgn0266450,FBgn0031785,FBgn0031770,FBgn0031774,FBgn0085208,FBgn0031771,FBgn0031769,FBgn0261683,FBgn0085409,FBgn0031786,FBgn0040950,FBgn0031781,FBgn0261697,FBgn0266521,FBgn0026755,FBgn0031782,FBgn0000052,FBgn0031768,FBgn0085209,FBgn0051639,FBgn0031775,FBgn0031777,FBgn0031773,FBgn0266449,FBgn0029161,FBgn0266445,FBgn0031779
FBgn0266072	FBgn0085450,FBgn0040099,FBgn0004177,FBgn0031941,FBgn0031957,FBgn0031942,FBgn0020880,FBgn0267326,FBgn0031935,FBgn0031946,FBgn0083968,FBgn0041182,FBgn0261790,FBgn0031961,FBgn0003961,FBgn0041181,FBgn0014454,FBgn0031948,FBgn0027515,FBgn0051902,FBgn0053296,FBgn0031959,FBgn0031950,FBgn0045038,FBgn0031955,FBgn0031937,FBgn0053121,FBgn0031947,FBgn0020618,FBgn0261800,FBgn0031936,FBgn0267689,FBgn0031952,FBg…
FBgn0266073	FBgn0034978,FBgn0034967,FBgn0023170,FBgn0003353,FBgn0034982,FBgn0034976,FBgn0034986,FBgn0034971,FBgn0041582,FBgn0086129,FBgn0011726,FBgn0034968,FBgn0025806,FBgn0260770,FBgn0034966,FBgn0266083,FBgn0019643,FBgn0034975,FBgn0264298,FBgn0021875,FBgn0034985,FBgn0034989,FBgn0034970,FBgn0034972,FBgn0264297,FBgn0041706,FBgn0015544,FBgn0259937,FBgn0034973,FBgn0034990,FBgn0034974,FBgn0034988,FBgn0260775,FBg…
FBgn0266074	FBgn0034998,FBgn0260770,FBgn0034994,FBgn0034999,FBgn0260775,FBgn0005636,FBgn0266083,FBgn0019643,FBgn0050419,FBgn0034985,FBgn0034989,FBgn0003888,FBgn0034982,FBgn0034996,FBgn0050418,FBgn0015544,FBgn0034986,FBgn0034997,FBgn0259937,FBgn0005638,FBgn0034990,FBgn0034988
FBgn0266086	FBgn0035068,FBgn0035064,Novel000075,FBgn0053988,FBgn0050161,FBgn0027590,FBgn0035059,FBgn0035063,FBgn0085243,FBgn0035056,FBgn0035049,FBgn0023181,FBgn0035042,FBgn0035046,FBgn0035057,FBgn0035050,FBgn0035060,FBgn0035065,FBgn0262098,FBgn0000157,FBgn0260456,FBgn0015801,FBgn0040666,Novel000076,FBgn0050421,Novel000074,FBgn0035044,FBgn0261373,FBgn0035043,FBgn0041205,FBgn0086908,FBgn0050163,FBgn0035047,FBg…
FBgn0266087	FBgn0027599,FBgn0265193,FBgn0066084,FBgn0035086,Novel000074,FBgn0035087,FBgn0040666,FBgn0015801,Novel000076,FBgn0000157,FBgn0262098,FBgn0035060,FBgn0035065,FBgn0022343,FBgn0025578,FBgn0035069,FBgn0028738,FBgn0035083,FBgn0041205,FBgn0086908,FBgn0050423,FBgn0035070,FBgn0035077,FBgn0043792,FBgn0035059,FBgn0027590,FBgn0035078,FBgn0085434,FBgn0035076,Novel000075,FBgn0085442,FBgn0035064,FBgn0035068,FBg…
FBgn0266088	FBgn0035090,FBgn0035083,FBgn0001147,FBgn0035073,FBgn0050423,FBgn0035077,FBgn0010435,FBgn0060296,FBgn0035085,FBgn0035088,FBgn0050424,FBgn0035091,FBgn0265182,FBgn0004055,FBgn0035092,FBgn0265434,FBgn0035076,FBgn0085434,FBgn0085442,FBgn0022343,FBgn0035084,FBgn0035082,FBgn0066084,FBgn0265193,FBgn0035086,FBgn0043792,FBgn0027599,FBgn0002607,FBgn0035089,FBgn0035087,FBgn0035078
FBgn0266094	FBgn0000535,FBgn0030594,FBgn0030593,FBgn0030595,FBgn0266435,FBgn0027601,FBgn0030599,FBgn0030600,FBgn0030597,FBgn0030589,FBgn0264078,FBgn0052594,FBgn0030592,Novel000234,FBgn0030598,FBgn0030588,FBgn0030596,FBgn0266434,FBgn0030590,FBgn0052591,FBgn0030603
FBgn0266095	FBgn0052758,FBgn0029818,FBgn0029811,FBgn0029820,FBgn0029807,FBgn0000394,FBgn0029804,FBgn0029809,FBgn0261610,FBgn0013987,FBgn0265417,FBgn0029819,FBgn0029799,FBgn0029816,FBgn0029810,FBgn0053080,FBgn0029795,FBgn0029813,Novel000201,FBgn0029812,FBgn0029817,FBgn0027564,FBgn0014340,FBgn0029801,FBgn0029798,FBgn0261383,FBgn0029791,FBgn0262610,FBgn0029800,FBgn0259149,FBgn0029814,FBgn0262611
FBgn0266096	FBgn0029733,FBgn0052772,FBgn0052767,FBgn0029737,FBgn0029746,FBgn0260971,FBgn0003028,Novel000217,FBgn0029740,FBgn0029736,FBgn0004368,FBgn0061196,FBgn0029730,FBgn0029745,FBgn0266098,FBgn0266000
FBgn0266097	FBgn0266098,FBgn0029746,FBgn0029745,FBgn0029747
FBgn0266114	FBgn0030440,FBgn0030443,FBgn0030438,FBgn0010303,FBgn0052638,FBgn0030452,FBgn0052644,FBgn0265597,FBgn0052643,FBgn0030439,FBgn0030451,FBgn0250862,FBgn0052645,FBgn0030455,FBgn0263005,FBgn0030441,FBgn0052642,FBgn0030437,FBgn0261524,FBgn0030449,FBgn0030447
FBgn0266115	FBgn0030955,FBgn0052544,FBgn0030954,FBgn0030956,FBgn0030963,FBgn0001090,FBgn0085430,FBgn0030975,FBgn0030976,FBgn0004462,FBgn0085451,FBgn0259231,FBgn0030968,FBgn0030952,FBgn0259198,FBgn0259927,FBgn0030949,FBgn0030973,FBgn0030959,FBgn0030966,FBgn0030961,FBgn0030970,FBgn0030974,FBgn0030951,FBgn0030960,FBgn0030969,FBgn0030964
FBgn0266116	FBgn0035228,FBgn0035229,FBgn0035217,FBgn0052313,FBgn0261243,FBgn0041342,FBgn0035232,FBgn0020248,FBgn0003295,FBgn0053971,FBgn0035227,FBgn0035235,FBgn0267487,FBgn0052319,FBgn0028577,FBgn0043865,FBgn0052320,FBgn0028567,FBgn0004635,FBgn0011204,FBgn0035216,FBgn0035218,FBgn0035233,Novel000102,FBgn0035231,FBgn0043458
FBgn0266138	FBgn0085196,FBgn0051820,FBgn0266459,FBgn0028645,FBgn0028514,FBgn0028856,FBgn0028520,FBgn0264364,FBgn0028644,FBgn0013433,FBgn0028858,FBgn0000182,FBgn0045827,FBgn0032577,FBgn0028857
FBgn0266139	FBgn0051720,FBgn0032214,FBgn0265002,FBgn0085188,FBgn0032208,FBgn0032202,FBgn0032189,FBgn0026379,FBgn0051874,FBgn0032195,FBgn0032194,FBgn0005322,FBgn0032188,FBgn0032198,FBgn0032204,FBgn0032187,FBgn0032205,FBgn0032211,FBgn0005593,FBgn0032192,FBgn0027491,Novel000032,FBgn0032191,FBgn0083945,FBgn0028675,FBgn0000229,FBgn0260750,FBgn0032197,FBgn0032210,FBgn0051717,FBgn0024320,FBgn0011305,FBgn0032209,FBg…
FBgn0266140	FBgn0000153,FBgn0053306,FBgn0028532,FBgn0028847,FBgn0026373,FBgn0051813,FBgn0015271,FBgn0028533,FBgn0064115,FBgn0028931,FBgn0028919,FBgn0053307,FBgn0028539,FBgn0028540,FBgn0004406,FBgn0024846,FBgn0051814,FBgn0028538,FBgn0032533,FBgn0001965,FBgn0263206,FBgn0028848,FBgn0028534,FBgn0028527,FBgn0028658,FBgn0028541,FBgn0028509,FBgn0028920,FBgn0028932,FBgn0260407,FBgn0027844,FBgn0001961,FBgn0004407
FBgn0266142	FBgn0028931,FBgn0012037,FBgn0028533,FBgn0064115,FBgn0015271,FBgn0000153,FBgn0053306,FBgn0032535,FBgn0028532,FBgn0026373,FBgn0032536,FBgn0053307,FBgn0028544,FBgn0004406,FBgn0028539,FBgn0028540,FBgn0028543,FBgn0028919,FBgn0261514,FBgn0261628,FBgn0032533,FBgn0001965,FBgn0263206,FBgn0024846,FBgn0028538,FBgn0028920,FBgn0028932,FBgn0028541,FBgn0028938,FBgn0025115,FBgn0028509,FBgn0004407,FBgn0001961,FBg…
FBgn0266145	FBgn0020258,FBgn0028916,FBgn0261535,FBgn0028530,Novel000038,FBgn0262354,FBgn0015791,FBgn0264253,FBgn0015546,FBgn0004858,FBgn0028531,FBgn0028844,FBgn0264810,FBgn0261529,FBgn0001970,FBgn0261563,FBgn0261534,FBgn0052971,FBgn0028871,Novel000018
FBgn0266146	FBgn0000056,FBgn0003016,FBgn0261566,FBgn0028844,FBgn0000055,FBgn0005771,FBgn0053648,FBgn0250844,FBgn0028913
FBgn0266147	FBgn0028913,FBgn0250844,FBgn0005771,FBgn0053648,FBgn0000055,FBgn0028844,FBgn0261566,FBgn0003016,FBgn0000056
FBgn0266148	FBgn0028913,FBgn0250844,FBgn0005771,FBgn0053648,FBgn0000055,FBgn0003016,FBgn0000056,FBgn0261566
FBgn0266149	FBgn0005771,FBgn0053648,FBgn0028913,FBgn0250844,FBgn0261566,FBgn0003016,FBgn0000056,FBgn0000055
FBgn0266150	FBgn0053648,FBgn0005771,FBgn0250844,FBgn0028913,FBgn0000056,FBgn0003016,FBgn0261566,FBgn0000055
FBgn0266151	FBgn0260955,FBgn0053309,FBgn0028537,FBgn0032549,FBgn0085195,FBgn0032551,FBgn0028870,FBgn0028855,FBgn0028866,FBgn0260954,FBgn0261571,FBgn0003016,FBgn0250834,FBgn0028838,FBgn0028868,FBgn0261567,FBgn0260953,FBgn0085194,FBgn0051835
FBgn0266152	FBgn0085195,FBgn0032551,FBgn0028870,FBgn0028855,FBgn0260955,FBgn0053309,FBgn0028537,FBgn0032549,FBgn0261568,FBgn0250834,FBgn0028838,FBgn0028868,FBgn0261567,FBgn0028886,FBgn0260953,FBgn0051835,FBgn0085194,FBgn0028866,FBgn0260954,FBgn0261571,FBgn0003016
FBgn0266153	FBgn0020371,FBgn0001981,FBgn0041103,FBgn0001983,FBgn0266163,FBgn0028892,FBgn0032563,FBgn0003448,FBgn0028852
FBgn0266154	FBgn0001981,FBgn0001983,FBgn0041103,FBgn0028892,FBgn0266163,FBgn0002524,FBgn0032563,FBgn0003448,FBgn0020371
FBgn0266155	FBgn0032563,FBgn0002524,FBgn0003448,FBgn0001981,FBgn0028892,FBgn0266163,FBgn0001983,FBgn0020371
FBgn0266156	FBgn0001983,FBgn0020371,FBgn0266163,FBgn0028892,FBgn0003448,FBgn0002524,FBgn0032563
FBgn0266157	FBgn0002524,FBgn0259922,FBgn0003448,FBgn0028880,FBgn0001983,FBgn0028892,FBgn0028370,FBgn0266163,FBgn0020371
FBgn0266158	FBgn0003448,FBgn0028948,FBgn0259922,FBgn0028950,FBgn0002524,FBgn0028370,FBgn0028892,FBgn0266163,FBgn0001983,FBgn0028949,FBgn0028880,FBgn0020371,FBgn0028944
FBgn0266159	FBgn0028880,FBgn0028949,FBgn0028950,FBgn0259922,FBgn0028945,FBgn0028517,FBgn0051827,FBgn0264545,FBgn0264989,FBgn0028370,FBgn0028864,FBgn0028518,FBgn0028863,FBgn0264990,FBgn0028948,FBgn0051780,FBgn0028947,FBgn0028944,FBgn0028946,FBgn0264544
FBgn0266160	FBgn0051826,FBgn0264989,FBgn0001990,FBgn0264545,FBgn0264260,FBgn0051827,FBgn0028517,FBgn0001987,FBgn0262150,FBgn0001986,FBgn0028901,FBgn0264990,FBgn0028863,FBgn0028864,FBgn0028507,FBgn0001989,FBgn0264544,FBgn0028900,FBgn0041627,FBgn0010382,FBgn0051780
FBgn0266161	FBgn0032577,FBgn0028903,FBgn0264364,FBgn0262150,FBgn0028858,FBgn0028645,FBgn0265668,FBgn0085196,FBgn0261925,FBgn0045827,FBgn0051823,FBgn0028857,FBgn0051821,FBgn0028644,FBgn0028856,FBgn0051735,FBgn0028900,FBgn0041183,FBgn0028514,FBgn0051820,FBgn0028935,FBgn0028902
FBgn0266162	FBgn0261925,FBgn0265668,FBgn0085196,FBgn0028645,FBgn0028858,FBgn0264364,FBgn0028903,FBgn0032577,FBgn0028902,FBgn0028935,FBgn0051820,FBgn0041183,FBgn0028514,FBgn0051735,FBgn0028900,FBgn0051821,FBgn0028644,FBgn0028856,FBgn0028857,FBgn0045827,FBgn0051823
FBgn0266164	FBgn0085196,FBgn0051820,FBgn0001991,FBgn0266459,FBgn0085197,FBgn0028884,FBgn0264364,FBgn0028520,FBgn0028644,FBgn0000182,FBgn0013433,FBgn0028858,FBgn0045827
FBgn0266165	FBgn0028644,FBgn0028520,FBgn0000182,FBgn0013433,FBgn0085197,FBgn0028884,FBgn0028893,FBgn0266459,FBgn0261999,FBgn0001991
FBgn0266166	FBgn0259712,FBgn0032175,FBgn0032171,FBgn0051712,FBgn0032167,FBgn0032166,FBgn0032170,FBgn0024285,FBgn0015664,FBgn0032161,FBgn0004867,FBgn0027600,FBgn0032156,FBgn0053302,FBgn0051755,FBgn0032154,FBgn0029174,FBgn0032157,FBgn0032163,FBgn0032162,FBgn0032168,FBgn0032153,FBgn0032169,FBgn0040064,FBgn0011272,FBgn0051713,FBgn0053301,FBgn0032151,FBgn0051875,FBgn0010520,FBgn0000180,FBgn0032160,FBgn0085212,FBg…
FBgn0266168	FBgn0083945,FBgn0032175,FBgn0032171,FBgn0032170,FBgn0015664,FBgn0000180,FBgn0032187,FBgn0027600,FBgn0032178,FBgn0053302,FBgn0011584,FBgn0032184,FBgn0051755,FBgn0032172,FBgn0032168,FBgn0032169,FBgn0265002,FBgn0267727,FBgn0043456,FBgn0011272,FBgn0032181,FBgn0032176,FBgn0051875,FBgn0053301
FBgn0266169	FBgn0053302,FBgn0032178,FBgn0027600,FBgn0032187,FBgn0015664,FBgn0000180,FBgn0032170,FBgn0032175,FBgn0032171,FBgn0083945,FBgn0053301,FBgn0032176,FBgn0051875,FBgn0032181,FBgn0011272,FBgn0265002,FBgn0043456,FBgn0267727,FBgn0032169,FBgn0032168,FBgn0032172,FBgn0011584,FBgn0032184,FBgn0051755
FBgn0266179	FBgn0010341,FBgn0259789,FBgn0066304,FBgn0042132,FBgn0052529,FBgn0031061,FBgn0031058,FBgn0031066,FBgn0066303,FBgn0031062,FBgn0026174,FBgn0031074,FBgn0026175,FBgn0261811,FBgn0031057,FBgn0031077,FBgn0052528,FBgn0031070,FBgn0031065,FBgn0010380,FBgn0031064,FBgn0040089,FBgn0031078,FBgn0031068,FBgn0086782,FBgn0031069,FBgn0031059,FBgn0086384,FBgn0031060
FBgn0266180	FBgn0029656,FBgn0029657,FBgn0010295,FBgn0000479,FBgn0040393,FBgn0010294,FBgn0029658,FBgn0003374,FBgn0262656,FBgn0002933,FBgn0003086,FBgn0010296
FBgn0266181	FBgn0038897,FBgn0038915,FBgn0261060,FBgn0038909,FBgn0053092,FBgn0045468,FBgn0262143,FBgn0064912,FBgn0038914,FBgn0051233,FBgn0038901,FBgn0013759,FBgn0003867,FBgn0051465,FBgn0067317,FBgn0027575,FBgn0051174,FBgn0045470,FBgn0038903,FBgn0051176,FBgn0259237,FBgn0038902,FBgn0260940,FBgn0083984,FBgn0045469,FBgn0051431,FBgn0051343,FBgn0041229,FBgn0051198,FBgn0262144,FBgn0038916,FBgn0054034,FBgn0015229,FBg…
FBgn0266182	FBgn0030638,FBgn0022710,FBgn0030657,FBgn0259195,FBgn0263257,FBgn0259196,FBgn0030653,FBgn0030643,FBgn0040285,FBgn0030647,FBgn0030654,FBgn0030641,FBgn0014455,FBgn0030640,FBgn0030661,FBgn0030662,FBgn0030658,FBgn0027287,FBgn0030660,FBgn0026433,FBgn0030642,FBgn0030648,FBgn0030659,FBgn0030645,FBgn0267977,FBgn0030655,FBgn0004391
FBgn0266183	FBgn0031057,FBgn0027358,FBgn0052528,FBgn0031070,FBgn0010380,FBgn0031064,FBgn0031041,FBgn0004057,FBgn0040089,FBgn0031068,FBgn0031047,FBgn0031060,FBgn0031043,FBgn0031059,FBgn0259789,FBgn0066304,FBgn0031049,FBgn0087008,FBgn0010341,FBgn0031050,FBgn0031048,FBgn0031042,FBgn0031053,FBgn0031062,FBgn0031040,FBgn0031054,FBgn0031044,FBgn0031065,FBgn0031052,FBgn0031055,FBgn0031069,FBgn0086384,FBgn0031045,FBg…
FBgn0266196	FBgn0000137,FBgn0025633,FBgn0023535,FBgn0266572,FBgn0052817,FBgn0023537,FBgn0023536,FBgn0011822,FBgn0029522,FBgn0023534,FBgn0024983,FBgn0000108,FBgn0261930,FBgn0002561,FBgn0052816,FBgn0029524,FBgn0004648,FBgn0260400,FBgn0010019,FBgn0004170,FBgn0029525
FBgn0266197	FBgn0004648,FBgn0260400,FBgn0010019,FBgn0029525,FBgn0261930,FBgn0052816,FBgn0002561,FBgn0029524,FBgn0011822,FBgn0023536,FBgn0029522,FBgn0023534,FBgn0024983,FBgn0000108,FBgn0000137,FBgn0025633,FBgn0023535,FBgn0052817,FBgn0266572,FBgn0023537
FBgn0266198	FBgn0030680,FBgn0030663,FBgn0011741,FBgn0026666,FBgn0030670,FBgn0003463,FBgn0259195,FBgn0030678,FBgn0022710,FBgn0030657,FBgn0030667,FBgn0030669,FBgn0030655,FBgn0030659,FBgn0030671,FBgn0030660,FBgn0030672,FBgn0030666,FBgn0030673,FBgn0030676,FBgn0030658,FBgn0030662,FBgn0030674,FBgn0030661,FBgn0030665,FBgn0030679,FBgn0030664,FBgn0030654,FBgn0030675,FBgn0030653,FBgn0030668,FBgn0259196
FBgn0266199	FBgn0040941,FBgn0052685,FBgn0030186,FBgn0264503,FBgn0030187,Novel000230,FBgn0085437,FBgn0004045,FBgn0030174,FBgn0030183,FBgn0083940,Novel000229,FBgn0030181,FBgn0030178,FBgn0259170,FBgn0263220,FBgn0263132,FBgn0028342,Novel000228,FBgn0052693,FBgn0005391,FBgn0040942,FBgn0030177
FBgn0266200	FBgn0028336,FBgn0029912,FBgn0029502,FBgn0029905,FBgn0029890,FBgn0029899,FBgn0062413,FBgn0029907,FBgn0029894,FBgn0029892,FBgn0029882,FBgn0028360,FBgn0029893,FBgn0029898,FBgn0029891,FBgn0029906,FBgn0025815,FBgn0029911,FBgn0029887,FBgn0029909,FBgn0263968,FBgn0029881,FBgn0029897,FBgn0029903,FBgn0265362,FBgn0086693,FBgn0029895,FBgn0029896,FBgn0029888,FBgn0003390,FBgn0259228,FBgn0029885
FBgn0266201	FBgn0025632,FBgn0261954,FBgn0023545,FBgn0025631,FBgn0004861,FBgn0004860,FBgn0026878,FBgn0013432,FBgn0004654,FBgn0025625,FBgn0029596,FBgn0025630,FBgn0025624,FBgn0025628,FBgn0003964,FBgn0004655,FBgn0025627,FBgn0264562,FBgn0025626,FBgn0025629,FBgn0040394,FBgn0023507,FBgn0000667,FBgn0000382,FBgn0040395
FBgn0266203	FBgn0026141,FBgn0011294,FBgn0263320,FBgn0053923,FBgn0041097,FBgn0263321,FBgn0053126,Novel000013,FBgn0051659,FBgn0031333,FBgn0051924,FBgn0031332,FBgn0031337,FBgn0031331,FBgn0031335,FBgn0002543,FBgn0053922
FBgn0266204	FBgn0259151,FBgn0001994,FBgn0087041,FBgn0040079,FBgn0028841,FBgn0000307,FBgn0028506,FBgn0032582,FBgn0028896,FBgn0261999,FBgn0040984,FBgn0024734,FBgn0028897,FBgn0028894,FBgn0028515,FBgn0011708,FBgn0014092,FBgn0001995,FBgn0001086,FBgn0000339,FBgn0028899,FBgn0028525,FBgn0015338,FBgn0028893,FBgn0002673,FBgn0028375,FBgn0265578,FBgn0001992,FBgn0028895,FBgn0262000,FBgn0025678,FBgn0000250
FBgn0266205	FBgn0032671,FBgn0032668,FBgn0041184,FBgn0032663,FBgn0051788,FBgn0032665,FBgn0051785,FBgn0001301,FBgn0051802,FBgn0261804,FBgn0032669,FBgn0265669,FBgn0032664,FBgn0032666,FBgn0032670,FBgn0051787,FBgn0267486,FBgn0051741
FBgn0266206	FBgn0051787,FBgn0263086,FBgn0263094,FBgn0267486,FBgn0051788,FBgn0261804,FBgn0261057,FBgn0051802,FBgn0000636,FBgn0032677,FBgn0011559
FBgn0266207	FBgn0051788,FBgn0263086,FBgn0051787,FBgn0267486,FBgn0263094,FBgn0261057,FBgn0051802,FBgn0000636,FBgn0032677,FBgn0011559,FBgn0261804,FBgn0085200
FBgn0266208	FBgn0003270,FBgn0032681,FBgn0051789,FBgn0032694,FBgn0032684,FBgn0085370,FBgn0032692,FBgn0032688,FBgn0261597,FBgn0032690,FBgn0032689,FBgn0032685,FBgn0032680,FBgn0032691,FBgn0032683,FBgn0032682,FBgn0032679,FBgn0086707
FBgn0266209	FBgn0045852,FBgn0032705,FBgn0032709,FBgn0032717,FBgn0032700,FBgn0032713,FBgn0032706,FBgn0032703,FBgn0040992,FBgn0015808,FBgn0032719,FBgn0032707,FBgn0260228,FBgn0032721,FBgn0032701,FBgn0264362,FBgn0032720,FBgn0027074,FBgn0259201,FBgn0261806,FBgn0003896,FBgn0032702,FBgn0032704,FBgn0027070,FBgn0053120,FBgn0040993,FBgn0032715,FBgn0051752,FBgn0025608
FBgn0266210	FBgn0086446,FBgn0032741,FBgn0010300,FBgn0010309,FBgn0261396,FBgn0032749,FBgn0032752,FBgn0263198,FBgn0032746,FBgn0032740,FBgn0086444,FBgn0263982,FBgn0028569,FBgn0086442,FBgn0002023,FBgn0032753,FBgn0051800,FBgn0265263,FBgn0267726,FBgn0001202,FBgn0086710,FBgn0010097,FBgn0002031,FBgn0086443,FBgn0032751,FBgn0032755,FBgn0002022,FBgn0000422,Novel000039,FBgn0032744,FBgn0032763,FBgn0002021,FBgn0015380,FBg…
FBgn0266213	FBgn0042129,FBgn0263873,FBgn0045064,FBgn0263773,FBgn0003978,FBgn0032835,FBgn0014127,FBgn0003141,FBgn0004374,FBgn0054051,FBgn0032843,FBgn0262140,FBgn0044811,FBgn0032847,FBgn0032834,FBgn0032840,FBgn0032839,FBgn0032850,FBgn0032849,FBgn0264443,FBgn0032833,FBgn0032845,FBgn0053117,FBgn0014000,FBgn0032848,FBgn0019686,FBgn0032836,FBgn0032846
FBgn0266214	FBgn0054007,FBgn0032869,FBgn0086657,FBgn0032878,FBgn0032877,FBgn0032873,FBgn0261787,FBgn0265256,FBgn0051680,FBgn0032870,FBgn0014859,FBgn0032867,FBgn0032876,FBgn0032868,FBgn0051678,FBgn0032871,Novel000021,FBgn0261058,FBgn0051677,FBgn0016054,FBgn0042133
FBgn0266216	FBgn0011829,FBgn0032913,FBgn0026255,FBgn0032916,FBgn0051988,FBgn0053510,FBgn0032934,FBgn0051627,FBgn0261239,FBgn0053511,FBgn0021856,FBgn0026577,FBgn0263050,FBgn0040297,FBgn0032914,FBgn0032922,FBgn0032925,FBgn0032935,FBgn0032919,FBgn0051626,FBgn0032921,FBgn0024371,FBgn0000239,FBgn0032923,FBgn0032929,FBgn0023388,FBgn0010100,FBgn0032915,FBgn0083972,FBgn0051624,FBgn0086251,FBgn0032911,FBgn0032924,FBg…
FBgn0266217	FBgn0261647,FBgn0264978,FBgn0264672,FBgn0031424,FBgn0031418,FBgn0031423,FBgn0085477,FBgn0031414,FBgn0011818,FBgn0264988,FBgn0031420,FBgn0031413,FBgn0014010,FBgn0031430,FBgn0031419,FBgn0085476,FBgn0031426,FBgn0000490,FBgn0031417,FBgn0031422,FBgn0031428,FBgn0264081,FBgn0051948
FBgn0266218	FBgn0051633,FBgn0031849,FBgn0000351,FBgn0031837,FBgn0031850,FBgn0028467,FBgn0085374,FBgn0031834,FBgn0031831,FBgn0028990,FBgn0263200,FBgn0031835,FBgn0051636,FBgn0263916,FBgn0025777,FBgn0031832,FBgn0028703,FBgn0051635,FBgn0025595,FBgn0051637,FBgn0051634,FBgn0031842,FBgn0000392,FBgn0031829,FBgn0031848,FBgn0085339,FBgn0031836,FBgn0000320,FBgn0031851,FBgn0031830,FBgn0031844
FBgn0266219	FBgn0086451,FBgn0031873,FBgn0031861,FBgn0051632,FBgn0031866,FBgn0016978,FBgn0031860,FBgn0026196,FBgn0031876,FBgn0031872,FBgn0031859,FBgn0031877,FBgn0015776,FBgn0004838,FBgn0031869,FBgn0020616,FBgn0052829,FBgn0015777,FBgn0031871,FBgn0031875,FBgn0017551,FBgn0262877,FBgn0264922,FBgn0031879,FBgn0031868,FBgn0031878,FBgn0031858,FBgn0042092,FBgn0031874,FBgn0042189,FBgn0021944,FBgn0031865,FBgn0028554,FBg…
FBgn0266220	FBgn0031865,FBgn0028554,FBgn0011737,FBgn0042189,FBgn0031874,FBgn0021944,FBgn0031878,FBgn0031858,FBgn0031868,FBgn0042092,FBgn0262877,FBgn0264922,FBgn0020616,FBgn0052829,FBgn0031875,FBgn0031871,FBgn0015777,FBgn0017551,FBgn0031859,FBgn0015776,FBgn0031877,FBgn0004838,FBgn0031869,FBgn0031873,FBgn0031857,FBgn0051632,FBgn0031861,FBgn0016978,FBgn0031866,FBgn0031876,FBgn0031872,FBgn0026196,FBgn0031860,FBg…
FBgn0266221	FBgn0051601,FBgn0051600,FBgn0032971,FBgn0051702,FBgn0084001,FBgn0085202,FBgn0032969,FBgn0028979,FBgn0032967,FBgn0260996,FBgn0032966,FBgn0032968,FBgn0051693
FBgn0266222	FBgn0051600,FBgn0086779,FBgn0003866,FBgn0051612,FBgn0032967,FBgn0032966,FBgn0032968,FBgn0032961,FBgn0032964,FBgn0032965
FBgn0266223	FBgn0032968,FBgn0032966,FBgn0032964,FBgn0032965,FBgn0032967,FBgn0051612,FBgn0051600,FBgn0003866
FBgn0266224	FBgn0003866,FBgn0051600,FBgn0051612,FBgn0032967,FBgn0032964,FBgn0032965,FBgn0032968,FBgn0032966
FBgn0266225	FBgn0032967,FBgn0032968,FBgn0032966,FBgn0032964,FBgn0032965,FBgn0051600,FBgn0003866,FBgn0051612
FBgn0266226	FBgn0046875,FBgn0010403,FBgn0037395,FBgn0037398,FBgn0083949,FBgn0011281,FBgn0037396,FBgn0046876,FBgn0026077,FBgn0051559,FBgn0040679,FBgn0037402,FBgn0037399,FBgn0003261,FBgn0046878
FBgn0266227	FBgn0263594,FBgn0037235,FBgn0037241,FBgn0037249,FBgn0037248,FBgn0261086,FBgn0037236,FBgn0037232,FBgn0003882,FBgn0037252,FBgn0051522,FBgn0037244,FBgn0037230,FBgn0037250,FBgn0040687,FBgn0086608,FBgn0037231,FBgn0037238,FBgn0261434,FBgn0037240,FBgn0051525,FBgn0051528,FBgn0037229,FBgn0086605,FBgn0037242,FBgn0027866,FBgn0052944,FBgn0041605,FBgn0037251,FBgn0027930,FBgn0037239,FBgn0037234,FBgn0051523
FBgn0266228	FBgn0026417,FBgn0263346,FBgn0260794,FBgn0087013,FBgn0264897,FBgn0037262,FBgn0037263,FBgn0027570,Novel000140,FBgn0087012,FBgn0037265,FBgn0037282,FBgn0037275,FBgn0022981,FBgn0037276,FBgn0037280,FBgn0010750,FBgn0026620,FBgn0053927,FBgn0037261,FBgn0040466,FBgn0037279,FBgn0037270,FBgn0264907
FBgn0266229	FBgn0027608,FBgn0037365,FBgn0262125,FBgn0266672,FBgn0037372,FBgn0046222,FBgn0051546,FBgn0261561,FBgn0051551,FBgn0037368,FBgn0037382,FBgn0037374,FBgn0037363,FBgn0044823,FBgn0037379,FBgn0037370,FBgn0037384,FBgn0037359,FBgn0037350,FBgn0261261,FBgn0037356,FBgn0027497,FBgn0037351,FBgn0037376,FBgn0037375,FBgn0051549,FBgn0263353,FBgn0004878,FBgn0027951,FBgn0028690,FBgn0037369,FBgn0037377,FBgn0037360,FBg…
FBgn0266230	FBgn0083949,FBgn0011281,FBgn0037398,FBgn0010403,FBgn0037395,FBgn0037396,FBgn0040679,FBgn0003261
FBgn0266231	FBgn0040679,FBgn0003261,FBgn0011281,FBgn0083949,FBgn0010403,FBgn0037398,FBgn0037395,FBgn0037396
FBgn0266232	FBgn0003261,FBgn0026077,FBgn0037399,FBgn0040679,FBgn0037396,FBgn0010403,FBgn0037398,FBgn0037395,FBgn0011281,FBgn0083949
FBgn0266233	FBgn0003261,FBgn0026077,FBgn0040679,FBgn0037399,FBgn0037396,FBgn0010403,FBgn0037398,FBgn0037395,FBgn0083949,FBgn0011281
FBgn0266234	FBgn0037405,FBgn0037396,FBgn0046875,FBgn0037398,FBgn0037395,FBgn0046878,FBgn0003261,FBgn0037409,FBgn0037406,FBgn0046876,FBgn0026077,FBgn0051559,FBgn0037408,FBgn0037402,FBgn0037399
FBgn0266235	FBgn0000071,FBgn0000439,FBgn0085326,FBgn0003339,FBgn0000552,FBgn0004781,FBgn0000166,FBgn0002522,FBgn0004778,FBgn0004777,FBgn0004782,FBgn0001077,FBgn0004053,FBgn0004780,FBgn0004054,FBgn0004779,FBgn0051481,FBgn0004783
FBgn0266236	FBgn0003339,FBgn0260642,FBgn0001077,FBgn0000439
FBgn0266237	FBgn0000439,FBgn0001077,FBgn0260642,FBgn0003339
FBgn0266238	FBgn0037468,FBgn0037472,Novel000172,FBgn0026563,FBgn0037475,Novel000170,FBgn0037466,FBgn0037469,FBgn0260642,FBgn0051493,FBgn0037470,FBgn0051248,FBgn0261238,FBgn0040670,Novel000174,FBgn0003884,Novel000173,FBgn0037467,Novel000175,FBgn0019828,FBgn0037463,Novel000171,FBgn0024289,FBgn0010774,FBgn0037464,FBgn0014863,FBgn0037473,FBgn0037465
FBgn0266239	FBgn0015576,FBgn0015575,FBgn0015568,FBgn0054023,FBgn0037503,FBgn0017456,FBgn0015571,FBgn0015831,FBgn0267105,FBgn0015572,FBgn0037501,FBgn0037506,FBgn0261393,FBgn0037502,FBgn0015574,FBgn0261502,FBgn0015577,FBgn0051544,FBgn0037504,FBgn0015570,FBgn0015569,FBgn0003885,FBgn0015770,FBgn0261508
FBgn0266240	FBgn0262899,FBgn0037514,FBgn0037512,FBgn0042103,FBgn0051473,FBgn0037519,FBgn0042105,FBgn0042104,FBgn0037518,FBgn0037521,FBgn0037517,FBgn0037515,FBgn0051472,FBgn0042102,FBgn0085413,FBgn0051146,FBgn0037520,FBgn0042101,FBgn0037513,FBgn0037516
FBgn0266241	FBgn0037536,FBgn0037544,FBgn0037534,FBgn0263596,FBgn0037541,FBgn0037551,FBgn0266598,FBgn0259974,FBgn0243512,FBgn0037538,FBgn0037547,FBgn0262363,FBgn0010401,FBgn0037535,FBgn0037549,FBgn0000504,FBgn0262362,FBgn0037550,FBgn0037548,FBgn0001255,FBgn0010812,FBgn0037540,FBgn0037543,FBgn0037537,FBgn0037546,FBgn0040524,FBgn0037533,FBgn0037539
FBgn0266242	FBgn0037619,FBgn0037610,FBgn0037606,FBgn0037621,FBgn0037627,FBgn0037620,FBgn0001180,FBgn0037614,FBgn0263231,FBgn0037623,FBgn0024326,FBgn0037612,FBgn0053325,FBgn0037626,FBgn0083971,FBgn0085330,FBgn0037607,FBgn0037603,FBgn0265158,FBgn0037624,FBgn0037601,FBgn0261015,FBgn0026399,FBgn0037625,FBgn0037618,FBgn0046874,FBgn0037616,FBgn0037615,FBgn0000447,FBgn0037617,FBgn0053189,FBgn0053191,FBgn0037608,FBg…
FBgn0266243	FBgn0037815,FBgn0051406,FBgn0037811,FBgn0262617,FBgn0037807,FBgn0045443,FBgn0020379,FBgn0266717,FBgn0278600,FBgn0037817,FBgn0037816,FBgn0015396,FBgn0037812,FBgn0037814,FBgn0037809,FBgn0024957,FBgn0037810,FBgn0259938
FBgn0266244	FBgn0024957,FBgn0045443,FBgn0259938,FBgn0020379,FBgn0037817,FBgn0278600,FBgn0037815,FBgn0037816,FBgn0037814,FBgn0001235,FBgn0015396
FBgn0266245	FBgn0026315,FBgn0263403,FBgn0083950,FBgn0040257,FBgn0040250,FBgn0040252,FBgn0040255,FBgn0037860,FBgn0040253,FBgn0040251,FBgn0037862,FBgn0261291,FBgn0027584,FBgn0040259,FBgn0026314,FBgn0040256
FBgn0266246	FBgn0043043,FBgn0264830,FBgn0010042,FBgn0004103,FBgn0042206,FBgn0259975,FBgn0001149,FBgn0038051,FBgn0038011,FBgn0038033,FBgn0264829,FBgn0010040,FBgn0266261,FBgn0038038,FBgn0038016,FBgn0038008,FBgn0003651,FBgn0082831,FBgn0038017,FBgn0010044,FBgn0038032,FBgn0038037,FBgn0038035,FBgn0010043,FBgn0038012,FBgn0038006,FBgn0038009,FBgn0038043,FBgn0038046,FBgn0038049,FBgn0010039,FBgn0038020,FBgn0010041,FBg…
FBgn0266247	FBgn0038071,FBgn0038078,FBgn0038076,FBgn0250910,FBgn0005355,FBgn0026207,FBgn0038079,FBgn0038069,FBgn0038065,FBgn0002905,FBgn0038067,FBgn0011745,FBgn0038073,FBgn0002719,FBgn0038080,FBgn0016693,FBgn0042207,FBgn0038074,FBgn0028374,FBgn0038070,FBgn0263621,FBgn0038063,FBgn0005671,FBgn0038072,FBgn0260444,FBgn0001296,FBgn0051347,FBgn0038068
FBgn0266248	FBgn0011474,FBgn0024321,FBgn0051321,FBgn0038225,FBgn0038220,FBgn0013767,FBgn0038221,FBgn0038224,FBgn0086901,FBgn0038223,FBgn0004855,FBgn0051320,FBgn0085417,FBgn0003480,FBgn0003862,FBgn0003567
FBgn0266249	FBgn0038285,FBgn0038280,FBgn0038282,FBgn0038291,FBgn0261859,FBgn0038286,FBgn0038281,FBgn0038290
FBgn0266250	FBgn0015230,FBgn0000014,FBgn0063261,FBgn0003944
FBgn0266251	FBgn0038611,FBgn0038621,FBgn0264816,FBgn0038617,FBgn0024432,FBgn0038607,FBgn0038603,FBgn0038601,FBgn0038613,FBgn0264751,FBgn0038598,FBgn0038610,FBgn0038602,FBgn0038606,FBgn0051235,FBgn0038619,FBgn0051122,FBgn0038608,FBgn0028670,FBgn0038596,FBgn0010877,FBgn0004618,FBgn0038609,FBgn0038597,FBgn0038595,FBgn0004652,FBgn0040569,FBgn0026250,FBgn0038612
FBgn0266252	FBgn0038832,FBgn0027493,FBgn0038839,FBgn0038829,FBgn0038826,FBgn0013995,FBgn0044810,FBgn0051223,FBgn0019936,FBgn0051191,FBgn0038828,FBgn0038830,FBgn0053094,FBgn0044809,FBgn0038842,FBgn0038840,FBgn0038837,FBgn0263400,FBgn0038834,FBgn0038838,FBgn0038827,FBgn0044812,FBgn0259215,FBgn0038833,FBgn0002921,FBgn0028396
FBgn0266253	FBgn0039342,FBgn0051439,FBgn0039335,FBgn0039339,FBgn0261287,FBgn0053494,FBgn0039341,FBgn0259991,FBgn0039336,FBgn0011666,FBgn0004509,FBgn0040212,FBgn0039337,FBgn0039338,FBgn0039343,FBgn0039344
FBgn0266254	FBgn0011670,FBgn0039395,FBgn0028717,FBgn0039380,FBgn0051093,FBgn0011668,FBgn0039374,FBgn0039396,FBgn0066101,FBgn0039387,FBgn0051092,FBgn0027865,FBgn0051089,FBgn0039368,FBgn0011669,FBgn0039378,FBgn0039386,FBgn0039371,FBgn0039376,FBgn0039366,FBgn0039369,FBgn0039367,FBgn0039381,FBgn0039370,FBgn0039379,FBgn0250831,FBgn0040602,FBgn0039373,FBgn0250757,FBgn0261061,FBgn0051380,FBgn0051091,FBgn0011273,FBg…
FBgn0266255	FBgn0028833,FBgn0002578,FBgn0002632,FBgn0002733,FBgn0002735,FBgn0039411,FBgn0002592,FBgn0002734,FBgn0000591,FBgn0051323,FBgn0259146,FBgn0039406,FBgn0039413,FBgn0266668,FBgn0039415,FBgn0051324,FBgn0002633,FBgn0002609,FBgn0001139,FBgn0002629,FBgn0260224,FBgn0002732,FBgn0039402,FBgn0039405,FBgn0015269,FBgn0002631,FBgn0039408,FBgn0039404,FBgn0262576,FBgn0039403,FBgn0039407
FBgn0266256	FBgn0039435,FBgn0039439,FBgn0039440,FBgn0039448,FBgn0023179,FBgn0039437,FBgn0039441,FBgn0051080,FBgn0039434,FBgn0039443,FBgn0250908,FBgn0039444,FBgn0263289,FBgn0243586,FBgn0039431,FBgn0051081,FBgn0039436,FBgn0039438
FBgn0266257	FBgn0039609,FBgn0265274,FBgn0039600,FBgn0085324,FBgn0039596,FBgn0039611,FBgn0024273,FBgn0039595,FBgn0039599,FBgn0039601,FBgn0027655,FBgn0053203,FBgn0039602,FBgn0264324,FBgn0039598,FBgn0005642,FBgn0039597,FBgn0015589,FBgn0261289,FBgn0039594
FBgn0266258	FBgn0025457,FBgn0039686,FBgn0039684,FBgn0000247,FBgn0039680,FBgn0002924,FBgn0039694,FBgn0039696,FBgn0039691,FBgn0266137,FBgn0019972,FBgn0085325,FBgn0262112,FBgn0024841,FBgn0039678,FBgn0039685,FBgn0039683,FBgn0260969,FBgn0039676,FBgn0039697,FBgn0039682,FBgn0039677,FBgn0039687,FBgn0039688,FBgn0039710,FBgn0039703,FBgn0039690,FBgn0039709,FBgn0001297,FBgn0039707,FBgn0039681,FBgn0039702,FBgn0260990,FBg…
FBgn0266260	FBgn0037817,FBgn0278600,FBgn0259938,FBgn0020379,FBgn0024957,FBgn0045443,FBgn0001235,FBgn0037814,FBgn0037816,FBgn0037815
FBgn0266262	FBgn0029702,FBgn0040905,FBgn0052774,Novel000216,FBgn0029701,FBgn0029707,FBgn0029706,FBgn0002707,FBgn0000179,FBgn0040906,FBgn0040907,FBgn0029697,FBgn0040904,FBgn0029696,FBgn0262980,FBgn0262609,FBgn0266570,Novel000215,FBgn0262738,FBgn0041252,FBgn0029703,FBgn0262608,FBgn0029700,FBgn0029705
FBgn0266263	FBgn0250904,Novel000201,FBgn0259994,FBgn0029795,FBgn0053080,FBgn0046687,FBgn0085464,FBgn0029799,FBgn0259150,FBgn0261610,FBgn0013987,FBgn0029804,FBgn0000394,FBgn0029778,FBgn0029807,FBgn0026702,FBgn0029785,FBgn0052758,FBgn0029783,FBgn0263511,FBgn0028474,FBgn0029789,FBgn0259149,FBgn0029800,FBgn0003747,FBgn0004687,FBgn0029791,FBgn0259926,FBgn0029798,FBgn0261383,FBgn0029801,FBgn0027564,FBgn0015794
FBgn0266264	FBgn0262575,FBgn0027546,FBgn0029831,FBgn0029837,FBgn0029839,FBgn0003302,FBgn0026060,FBgn0029840,FBgn0029834,FBgn0029836,FBgn0029835,FBgn0029843,FBgn0029833,FBgn0029838,FBgn0264386,FBgn0029003
FBgn0266275	Novel000234,FBgn0052594,FBgn0030603,FBgn0030610,FBgn0260006,FBgn0030615,FBgn0030613,FBgn0030612,FBgn0030614,FBgn0030617,FBgn0053178,FBgn0264389,FBgn0263994,FBgn0030600,FBgn0030605,FBgn0030611,FBgn0030607,FBgn0030608,FBgn0000535,FBgn0030616,FBgn0053177
FBgn0266276	FBgn0030622,FBgn0004924,FBgn0030630,FBgn0030625,FBgn0030629,FBgn0015926,FBgn0030624,FBgn0030634,FBgn0030623,FBgn0000028,FBgn0003132,FBgn0262486,FBgn0263257,Novel000235,FBgn0261703,FBgn0030628,FBgn0262485,FBgn0030631,FBgn0026428
FBgn0266277	FBgn0030330,FBgn0030328,FBgn0030351,FBgn0030350,FBgn0030339,FBgn0002577,FBgn0000259,FBgn0030326,FBgn0030327,FBgn0266019,FBgn0030334,FBgn0004511,FBgn0030341,FBgn0030336,FBgn0030344,FBgn0260812,FBgn0259918,FBgn0030340,FBgn0030352,FBgn0030342,FBgn0030345,FBgn0030347,FBgn0030348,FBgn0030349,FBgn0014133,FBgn0030331,FBgn0030343,FBgn0030338,FBgn0085351,FBgn0030329,FBgn0030346,FBgn0011754,FBgn0030332,FBg…
FBgn0266278	FBgn0052598,FBgn0004649,FBgn0030566,FBgn0052601,FBgn0030545,FBgn0030555,FBgn0030551,FBgn0030559,FBgn0026713,FBgn0030562,FBgn0030558,FBgn0002873,FBgn0052600,FBgn0030552,FBgn0260482,FBgn0040153,FBgn0030563,FBgn0259166,FBgn0052602,FBgn0030554,FBgn0030556,FBgn0002917
FBgn0266279	FBgn0029882,FBgn0029891,FBgn0029898,FBgn0029893,FBgn0028360,FBgn0025815,FBgn0029906,FBgn0029911,FBgn0029912,FBgn0028336,FBgn0029905,FBgn0029890,FBgn0029502,FBgn0029907,FBgn0062413,FBgn0029899,FBgn0029892,FBgn0029894,FBgn0029896,FBgn0259228,FBgn0003390,FBgn0029888,FBgn0029885,FBgn0029913,FBgn0029909,FBgn0263968,FBgn0029887,FBgn0029897,FBgn0029881,FBgn0086693,FBgn0029895,FBgn0029903,FBgn0265362
FBgn0266280	FBgn0027343,FBgn0029532,FBgn0025616,FBgn0015288,FBgn0086368,FBgn0264449,FBgn0025620,FBgn0040383,FBgn0029535,FBgn0040382,FBgn0015799,FBgn0025621,FBgn0029531,FBgn0021764,FBgn0026874,FBgn0260855,FBgn0040343
FBgn0266281	FBgn0025616,FBgn0029532,FBgn0027343,FBgn0264449,FBgn0025620,FBgn0040383,FBgn0015288,FBgn0086368,FBgn0029535,FBgn0040382,FBgn0015799,FBgn0025621,FBgn0029531,FBgn0040343,FBgn0040892,FBgn0260855,FBgn0021764,FBgn0026874
FBgn0266302	FBgn0003308,FBgn0038107,FBgn0001217,FBgn0038108,FBgn0038114,FBgn0038115,FBgn0260962,FBgn0038123,FBgn0038122,FBgn0266615,FBgn0038109,FBgn0020496,FBgn0262365,FBgn0004666,FBgn0002354,FBgn0051157,FBgn0038102,FBgn0003450,FBgn0051342,FBgn0038105,FBgn0038113,FBgn0260793,FBgn0085337,FBgn0038118,FBgn0041710,FBgn0038110,FBgn0038106,FBgn0038111,FBgn0265083
FBgn0266305	FBgn0040510,FBgn0032456,FBgn0015399,FBgn0040506,FBgn0040509,FBgn0032457,FBgn0040508
FBgn0266306	FBgn0015399,FBgn0032456,FBgn0040510,FBgn0040506,FBgn0032457,FBgn0040509,FBgn0040508
FBgn0266308	FBgn0028943,FBgn0053640,FBgn0053645,FBgn0259984,FBgn0023407,FBgn0028941,FBgn0032530,FBgn0053641,FBgn0051814,FBgn0028942,FBgn0028513,FBgn0263354,FBgn0053644,FBgn0053642,FBgn0053643,FBgn0028546,FBgn0028527
FBgn0266309	FBgn0051826,FBgn0001987,FBgn0262150,FBgn0001986,FBgn0028901,FBgn0264989,FBgn0264545,FBgn0001990,FBgn0264260,FBgn0051827,FBgn0028517,FBgn0028864,FBgn0028507,FBgn0264990,FBgn0028863,FBgn0041627,FBgn0028900,FBgn0051780,FBgn0010382,FBgn0001989,FBgn0264544
FBgn0266312	Novel000039,FBgn0000422,FBgn0032752,FBgn0000075,FBgn0263982,FBgn0015380,FBgn0086444,FBgn0032763,FBgn0086445,FBgn0086447,FBgn0032750,FBgn0032748,FBgn0002036,FBgn0002023,FBgn0032754,FBgn0265263,FBgn0032753,FBgn0267726,FBgn0086446,FBgn0002031,FBgn0010097,FBgn0010309,FBgn0010300,FBgn0086443,FBgn0032749,FBgn0032755,FBgn0032751
FBgn0266313	FBgn0000464,FBgn0005590,FBgn0041180,FBgn0032799,FBgn0264845,FBgn0032801,FBgn0051697,FBgn0032800,FBgn0027949,FBgn0032805,FBgn0267964,FBgn0032797,FBgn0032813,FBgn0040268,FBgn0032809,FBgn0053116,FBgn0003231,FBgn0032798,FBgn0032812,FBgn0032796,FBgn0032803,FBgn0032811,FBgn0032810,FBgn0032814,FBgn0032804,FBgn0005672
FBgn0266314	FBgn0032816,FBgn0032809,FBgn0032813,FBgn0032815,FBgn0032805,FBgn0027949,FBgn0267964,FBgn0041180,FBgn0264845,FBgn0005590,FBgn0000464,FBgn0005672,FBgn0032814,FBgn0032810,FBgn0032812,FBgn0032811,FBgn0003231
FBgn0266315	FBgn0026756,FBgn0051683,FBgn0032857,FBgn0054007,FBgn0042175,FBgn0032859,FBgn0051687,FBgn0032858,FBgn0032856,FBgn0265256,FBgn0015803,FBgn0032863,FBgn0262878,FBgn0263355,FBgn0032860,FBgn0032864,Novel000021
FBgn0266318	FBgn0000256,FBgn0051960,FBgn0031574,FBgn0031568,FBgn0051958,FBgn0051773,FBgn0031573,FBgn0004567,FBgn0051957,FBgn0263842,FBgn0051774,FBgn0003430,FBgn0031575,FBgn0004893,FBgn0263846,FBgn0031571,FBgn0021800
FBgn0266320	FBgn0031693,FBgn0016920,FBgn0016076,FBgn0000228,FBgn0031703,FBgn0031698,FBgn0031696,FBgn0016660,FBgn0031702,FBgn0015031,FBgn0031695,FBgn0031694,FBgn0031697,FBgn0003716,FBgn0031701,FBgn0031700
FBgn0266321	FBgn0031763,FBgn0086266,FBgn0031760,FBgn0085410,FBgn0086265,FBgn0031758,FBgn0001128,FBgn0003979,FBgn0000052,FBgn0261055,FBgn0031762,FBgn0031768,FBgn0001941,FBgn0040949,FBgn0043362,FBgn0031759,FBgn0000308,FBgn0259959,FBgn0029161,FBgn0015381,FBgn0031757,FBgn0001089,FBgn0001942,FBgn0265785,FBgn0025742,FBgn0002855,FBgn0051643,FBgn0002856,FBgn0262814,FBgn0031764,FBgn0003980,FBgn0031765,FBgn0031766,FBg…
FBgn0266322	FBgn0025683,FBgn0031224,FBgn0031214,FBgn0026787,FBgn0031219,FBgn0031229,FBgn0051975,FBgn0067779,FBgn0031217,FBgn0031213,FBgn0005278,FBgn0031216,FBgn0016977,FBgn0031228,FBgn0053635,FBgn0031208,FBgn0051976,FBgn0031227,FBgn0002931,FBgn0031220,FBgn0002121,FBgn0031209,FBgn0051973,FBgn0001142,FBgn0259818,FBgn0051974
FBgn0266323	FBgn0031276,FBgn0000497,FBgn0041250,FBgn0031273,FBgn0000442,FBgn0031277,FBgn0031281,FBgn0031279,FBgn0040106,FBgn0086130,FBgn0026438,FBgn0011244,FBgn0040725,FBgn0040107,Novel000028,FBgn0051658,FBgn0031275
FBgn0266326	FBgn0027932,FBgn0032022,FBgn0032040,FBgn0032025,FBgn0053194,FBgn0014417,FBgn0032016,FBgn0051897,FBgn0264340,FBgn0263852,FBgn0010265,FBgn0027094,FBgn0032047,FBgn0027780,FBgn0262029,FBgn0032021,FBgn0040958,FBgn0032032,FBgn0032048,FBgn0002887,FBgn0043002,FBgn0262598,FBgn0032030,FBgn0032031,FBgn0262001,FBgn0032042,FBgn0032018,FBgn0026718,FBgn0051901,FBgn0051898,FBgn0032033,FBgn0020497,FBgn0032024,FBg…
FBgn0266328	FBgn0053863,Novel000041,FBgn0023416,FBgn0053861,FBgn0053869,FBgn0016919,FBgn0053868,FBgn0032949,FBgn0032955,FBgn0053870,FBgn0032957,FBgn0053862,FBgn0053865,FBgn0053860,FBgn0053866,FBgn0022893,FBgn0053864,FBgn0000559,FBgn0032956,Novel000022,FBgn0051619,Novel000023,FBgn0053871,FBgn0053859
FBgn0266329	FBgn0259735,FBgn0005677,FBgn0032587,FBgn0028523,FBgn0032585,FBgn0032588,FBgn0051816,FBgn0020416,FBgn0020415,FBgn0032586,FBgn0020414
FBgn0266348	FBgn0259677,FBgn0000719,FBgn0263829,FBgn0031201,FBgn0052499
FBgn0266349	FBgn0030631,FBgn0026428,Novel000235,FBgn0261703,FBgn0030628,FBgn0263257,FBgn0003132,FBgn0000028,FBgn0030624,FBgn0030634,FBgn0030623,FBgn0030629,FBgn0015926,FBgn0004924,FBgn0030630,FBgn0030625
FBgn0266350	FBgn0029659,FBgn0266429,FBgn0029662,FBgn0029657,FBgn0029663,FBgn0052791,FBgn0029660,FBgn0029658,FBgn0052792,FBgn0029661,Novel000200,FBgn0029656,FBgn0000479,FBgn0029665,FBgn0262656,FBgn0029672,FBgn0029664,FBgn0029666,FBgn0029669,FBgn0029667
FBgn0266351	FBgn0052580,FBgn0001092,FBgn0030721,FBgn0000319,FBgn0053180,FBgn0030697,FBgn0026076,FBgn0030710,FBgn0065035,FBgn0010240,FBgn0027093,FBgn0030711,FBgn0030701,FBgn0030707,FBgn0002914,FBgn0003969,Novel000208,FBgn0030719,FBgn0010315,FBgn0030720,FBgn0003392,FBgn0030699,FBgn0030717,FBgn0030716,FBgn0030715,FBgn0030700,FBgn0030704,FBgn0001105,FBgn0261834,FBgn0259110,FBgn0260938,FBgn0003345,FBgn0030703,FBg…
FBgn0266352	FBgn0011826,FBgn0267912,FBgn0025743,FBgn0052573,FBgn0030775,FBgn0011742,FBgn0267384,FBgn0030769,FBgn0030756,FBgn0026181,FBgn0030761,FBgn0264255,FBgn0030777,FBgn0030766,FBgn0010412,FBgn0030757,FBgn0015336,FBgn0030763,FBgn0015615,FBgn0030770,FBgn0030773,FBgn0260238,FBgn0030759,FBgn0030764,FBgn0259923,FBgn0261791,FBgn0085354,FBgn0030768,FBgn0061200,FBgn0027528,FBgn0052571,FBgn0261245,FBgn0030778,FBg…
FBgn0266355	FBgn0031181,FBgn0001565,FBgn0031174,FBgn0000709,FBgn0029067,FBgn0031171,FBgn0028583,FBgn0064116,FBgn0031176,FBgn0024182,FBgn0003423,FBgn0031178,FBgn0015558,FBgn0003464,FBgn0015379,FBgn0020272,FBgn0015527,FBgn0011710,FBgn0259245,FBgn0024251,FBgn0020369,FBgn0064117
FBgn0266356	FBgn0032878,FBgn0086657,FBgn0032881,FBgn0032877,FBgn0032869,FBgn0032870,FBgn0032883,FBgn0032873,FBgn0261787,FBgn0051680,FBgn0262743,FBgn0032876,FBgn0014859,FBgn0032867,FBgn0032879,FBgn0011202,FBgn0051677,FBgn0016054,FBgn0032882,FBgn0042133,FBgn0032868,FBgn0032871,FBgn0051678,FBgn0032880,FBgn0261058
FBgn0266357	Novel000013,FBgn0053126,FBgn0051659,FBgn0031333,FBgn0026141,FBgn0011294,FBgn0263320,FBgn0053923,FBgn0263321,FBgn0041097,FBgn0031337,FBgn0031331,FBgn0002543,FBgn0053922,FBgn0031335,FBgn0051924,FBgn0031332
FBgn0266358	FBgn0053126,Novel000013,FBgn0051659,FBgn0031333,FBgn0026141,FBgn0011294,FBgn0263320,FBgn0053923,FBgn0041097,FBgn0263321,FBgn0031337,FBgn0031331,FBgn0053922,FBgn0002543,FBgn0031335,FBgn0051924,FBgn0031332
FBgn0266361	FBgn0040031,FBgn0003559,FBgn0039943,FBgn0039941,FBgn0040514,FBgn0039965,FBgn0263830,FBgn0016976,FBgn0039944,FBgn0016975,FBgn0039945,FBgn0265767,FBgn0069938,FBgn0039966,FBgn0069973,FBgn0039946,FBgn0039942,FBgn0044872
FBgn0266362	FBgn0039946,FBgn0039942,FBgn0044872,FBgn0069938,FBgn0265767,FBgn0039966,FBgn0069973,FBgn0016976,FBgn0263830,FBgn0039945,FBgn0039944,FBgn0016975,FBgn0003559,FBgn0039943,FBgn0040031,FBgn0039965,FBgn0040514,FBgn0039941
FBgn0266365	FBgn0032375,FBgn0266363,FBgn0032378,FBgn0032376,FBgn0020309,FBgn0032381,FBgn0259963,FBgn0266364,FBgn0259961,FBgn0032382,FBgn0261805,FBgn0026392,FBgn0032377,FBgn0032373,FBgn0259962,FBgn0265349,FBgn0259960,FBgn0259989,FBgn0051704,FBgn0259964,Novel000034,FBgn0032374,FBgn0264750,FBgn0000588,FBgn0264815,FBgn0040968
FBgn0266366	FBgn0259960,FBgn0265349,FBgn0051704,FBgn0259964,Novel000034,FBgn0259989,FBgn0264750,FBgn0032374,FBgn0000588,FBgn0026391,FBgn0264815,FBgn0040968,FBgn0266363,FBgn0032375,FBgn0032381,FBgn0032376,FBgn0032378,FBgn0020309,FBgn0259961,FBgn0259963,FBgn0266364,FBgn0032377,FBgn0032373,FBgn0259962,FBgn0032382,FBgn0261805,FBgn0026392
FBgn0266378	FBgn0014865,FBgn0050468,FBgn0034009,FBgn0034010,FBgn0013750,FBgn0034022,FBgn0034021,FBgn0034013,FBgn0004698,FBgn0263980,FBgn0050472,FBgn0034008,FBgn0034012,FBgn0085217,FBgn0034023,FBgn0026370,FBgn0265194,FBgn0050469,FBgn0000996,FBgn0034011,FBgn0011660
FBgn0266379	FBgn0034071,FBgn0034062,FBgn0050093,FBgn0034066,FBgn0034059,FBgn0264089,FBgn0020236,FBgn0034053,FBgn0034049,FBgn0034051,FBgn0053463,FBgn0034052,FBgn0034060,FBgn0034050,FBgn0034057,FBgn0034054,FBgn0015247,FBgn0034065,FBgn0034058,FBgn0034061,FBgn0034067,FBgn0010590,FBgn0034070,FBgn0034068,FBgn0034063,FBgn0265045,FBgn0034072,FBgn0034069
FBgn0266380	FBgn0034295,FBgn0034307,FBgn0265297,FBgn0260392,FBgn0054005,FBgn0034299,FBgn0034300,FBgn0085225,FBgn0034296,FBgn0034286,FBgn0034292,FBgn0034304,FBgn0034290,FBgn0085415,FBgn0260401,FBgn0003520,FBgn0027836,FBgn0028983,FBgn0034294,FBgn0034288,FBgn0003044,FBgn0034289,FBgn0034293,FBgn0034301,FBgn0000057,FBgn0040465,FBgn0034312,FBgn0034308,FBgn0062440,FBgn0001222,FBgn0034310,FBgn0034291,FBgn0022238
FBgn0266381	FBgn0038784,FBgn0262582,FBgn0261550,FBgn0038787,FBgn0038783,FBgn0038796,FBgn0262869,FBgn0038788,FBgn0038789,FBgn0038795,FBgn0038790
FBgn0266382	FBgn0023212,FBgn0046689,FBgn0038818,FBgn0259222,FBgn0038810,FBgn0054008,FBgn0038826,FBgn0001169,FBgn0038820,FBgn0028422,FBgn0014029,FBgn0038814,FBgn0023097,FBgn0038808,FBgn0038819,FBgn0024944,FBgn0051205,FBgn0004107,FBgn0265606,FBgn0038809,FBgn0051195,FBgn0038806,FBgn0038811,FBgn0038821,FBgn0015279,FBgn0051199,FBgn0038815,FBgn0051200,FBgn0038816,FBgn0051201
FBgn0266383	FBgn0262580,FBgn0036422,FBgn0036421,FBgn0087007,FBgn0085273,FBgn0036423,FBgn0036416,FBgn0003459,FBgn0036419,FBgn0001085,FBgn0013718,FBgn0036417
FBgn0266384	FBgn0035630,FBgn0035641,FBgn0035640,FBgn0260458,FBgn0260936,FBgn0040298,FBgn0085447,FBgn0035631,FBgn0016756,FBgn0035632,FBgn0015806,FBgn0035638,FBgn0052418,FBgn0044419,FBgn0035639,FBgn0003984,FBgn0035642,FBgn0265714,FBgn0035636,FBgn0259167,FBgn0263106,FBgn0086694
FBgn0266389	FBgn0037762,FBgn0267336,FBgn0037754,FBgn0002868,FBgn0037761,FBgn0037759,FBgn0037753,FBgn0037764,FBgn0037757,FBgn0037766,FBgn0037755,FBgn0037763,FBgn0262104,FBgn0261599,Novel000177,FBgn0037760,FBgn0085331,FBgn0037756,FBgn0037758,FBgn0037751,FBgn0037765
FBgn0266390	FBgn0039621,FBgn0041780,FBgn0039625,FBgn0039626,FBgn0039634,FBgn0028692,FBgn0003093,FBgn0039632,FBgn0014869,FBgn0039642,FBgn0039645,FBgn0039647,FBgn0039631,FBgn0041588,FBgn0039628,FBgn0039638,FBgn0039636,FBgn0039633,FBgn0039637,FBgn0039627,FBgn0039635,FBgn0005596,FBgn0039629,FBgn0039622,FBgn0028671,FBgn0039620,FBgn0039641,FBgn0039644,FBgn0039630,FBgn0039623,FBgn0039640,FBgn0027873,FBgn0039639,FBg…
FBgn0266391	FBgn0033866,FBgn0033859,FBgn0261990,FBgn0266489,FBgn0033861,FBgn0085265,FBgn0261989,FBgn0033867,FBgn0262360,FBgn0000633,FBgn0033860,FBgn0033862,FBgn0033864,FBgn0027581,FBgn0033865,FBgn0033863
FBgn0266392	FBgn0033865,FBgn0033863,FBgn0033864,FBgn0027581,FBgn0085265,FBgn0261990,FBgn0262360,FBgn0000633,FBgn0033860,FBgn0266489,FBgn0033862,FBgn0033861,FBgn0033866,FBgn0033867,FBgn0033859
FBgn0266394	FBgn0052263,FBgn0003943,FBgn0064227,FBgn0052266,FBgn0035462,FBgn0015585,FBgn0035470,FBgn0052262,FBgn0035468,FBgn0026592,FBgn0035461,FBgn0004888,FBgn0035469,FBgn0035464,FBgn0035471,FBgn0013751,FBgn0004875,FBgn0035458,FBgn0052264,FBgn0004910,FBgn0035473,FBgn0041147
FBgn0266395	FBgn0037156,FBgn0004449,FBgn0015075,Novel000133,FBgn0011771,FBgn0025702,FBgn0027086,FBgn0028500,FBgn0004179,FBgn0037153
FBgn0266396	FBgn0036152,FBgn0036156,FBgn0036160,FBgn0036159,FBgn0036157,FBgn0036155,FBgn0265469,FBgn0036161,FBgn0036158,FBgn0036162,FBgn0036154,FBgn0036153
FBgn0266397	FBgn0039395,FBgn0015269,FBgn0002631,FBgn0039404,FBgn0039403,FBgn0002609,FBgn0002629,FBgn0001139,FBgn0260224,FBgn0002732,FBgn0039396,FBgn0002633,FBgn0051089,FBgn0002632,FBgn0002735,FBgn0039411,FBgn0002592,FBgn0039405,FBgn0039408,FBgn0262576,FBgn0039407,FBgn0000206,FBgn0039402,FBgn0000591,FBgn0259146,FBgn0039406,FBgn0266668,FBgn0039398,FBgn0051091,FBgn0028833,FBgn0002578,FBgn0250757,FBgn0002733,FBg…
FBgn0266398	FBgn0002733,FBgn0002734,FBgn0028833,FBgn0002578,FBgn0250757,FBgn0039398,FBgn0000591,FBgn0039406,FBgn0259146,FBgn0266668,FBgn0000206,FBgn0039402,FBgn0262576,FBgn0039407,FBgn0039405,FBgn0039408,FBgn0002735,FBgn0039411,FBgn0002592,FBgn0002632,FBgn0002633,FBgn0260224,FBgn0002732,FBgn0039396,FBgn0002609,FBgn0002629,FBgn0001139,FBgn0039404,FBgn0039403,FBgn0015269,FBgn0039395,FBgn0002631
FBgn0266399	FBgn0051324,FBgn0002633,FBgn0002632,FBgn0002735,FBgn0039411,FBgn0002592,FBgn0039395,FBgn0015269,FBgn0002631,FBgn0039404,FBgn0039403,FBgn0002609,FBgn0001139,FBgn0002629,FBgn0260224,FBgn0002732,FBgn0039396,FBgn0000591,FBgn0259146,FBgn0039406,FBgn0266668,FBgn0039398,FBgn0028833,FBgn0002578,FBgn0250757,FBgn0002733,FBgn0002734,FBgn0039405,FBgn0039408,FBgn0262576,FBgn0039407,FBgn0000206,FBgn0039402
FBgn0266400	FBgn0002632,FBgn0039411,FBgn0002592,FBgn0002735,FBgn0002633,FBgn0051324,FBgn0002609,FBgn0002629,FBgn0001139,FBgn0039396,FBgn0260224,FBgn0002732,FBgn0039395,FBgn0015269,FBgn0002631,FBgn0039403,FBgn0039404,FBgn0002578,FBgn0028833,FBgn0250757,FBgn0002733,FBgn0002734,FBgn0259146,FBgn0039406,FBgn0000591,FBgn0266668,FBgn0039398,FBgn0000206,FBgn0039402,FBgn0039405,FBgn0039408,FBgn0262576,FBgn0039407
FBgn0266401	Novel000160,FBgn0262587,FBgn0085466,FBgn0004171,FBgn0039576,FBgn0262588,FBgn0002865,FBgn0261618,FBgn0085383,FBgn0039577,FBgn0085465,FBgn0039580
FBgn0266402	FBgn0035496,FBgn0027552,FBgn0035499,FBgn0004910,FBgn0035477,FBgn0045476,FBgn0016013,FBgn0263832,FBgn0035478,FBgn0035498,FBgn0264516,FBgn0052255,FBgn0035483,FBgn0004516,FBgn0028484,FBgn0035482,FBgn0000449,FBgn0264693,FBgn0035491,FBgn0035480,FBgn0042179,FBgn0035488,FBgn0035481,FBgn0004895,FBgn0035479,FBgn0035476,FBgn0035484,FBgn0045478,FBgn0035497,FBgn0024179,FBgn0004880,FBgn0035486,FBgn0035475,FBg…
FBgn0266403	FBgn0035452,FBgn0005640,FBgn0262484,FBgn0026259,FBgn0041164,FBgn0040694,FBgn0052267,FBgn0035453,FBgn0001254,FBgn0014388,FBgn0010317,FBgn0259224,FBgn0035449
FBgn0266405	FBgn0038525,FBgn0038541,FBgn0051251,FBgn0038528,FBgn0038527,FBgn0038530,FBgn0038529,FBgn0264005,FBgn0038540,FBgn0038526,FBgn0261885,FBgn0016650,FBgn0038524,FBgn0003375,FBgn0051360,FBgn0261987,FBgn0038532,FBgn0038531,FBgn0085310,FBgn0051249,FBgn0038535,FBgn0038533,FBgn0040565,FBgn0038539,FBgn0262794,FBgn0004554,FBgn0038542,FBgn0038523,FBgn0038536,FBgn0000063
FBgn0266407	FBgn0038740,FBgn0038756,FBgn0021776,FBgn0038753,FBgn0038744,FBgn0038755,FBgn0038735,FBgn0038739,FBgn0038751,FBgn0051459,FBgn0038749,FBgn0038738,FBgn0038746,FBgn0038737,FBgn0002940,FBgn0038741,FBgn0038745,FBgn0038742,FBgn0038747,FBgn0260234,FBgn0051213,FBgn0038752,FBgn0014135,FBgn0038750,FBgn0014006,FBgn0261984
FBgn0266408	FBgn0261984,FBgn0014006,FBgn0038750,FBgn0014135,FBgn0051213,FBgn0038752,FBgn0260234,FBgn0038747,FBgn0038745,FBgn0038742,FBgn0002940,FBgn0038741,FBgn0038737,FBgn0038746,FBgn0038760,FBgn0038738,FBgn0038749,FBgn0051459,FBgn0038751,FBgn0038739,FBgn0038735,FBgn0038755,FBgn0038744,FBgn0038753,FBgn0021776,FBgn0038756,FBgn0038740
FBgn0266412	FBgn0250755,FBgn0039858,Novel000164,FBgn0039861,FBgn0039879,FBgn0039864,FBgn0261583,FBgn0039873,FBgn0039875,FBgn0261479,FBgn0039870,FBgn0039859,FBgn0039862,FBgn0017448,FBgn0039863,FBgn0003065,FBgn0270927,FBgn0000557,FBgn0039868,FBgn0039867,FBgn0039860,FBgn0039869,FBgn0039881,FBgn0039876,FBgn0000150,FBgn0011655,FBgn0022349,FBgn0039872,FBgn0039877,FBgn0027620,FBgn0005632,FBgn0003870
FBgn0266413	FBgn0260463,FBgn0024833,FBgn0002431,FBgn0027950,FBgn0005585,FBgn0037734,FBgn0278604,FBgn0037705,FBgn0003886,FBgn0037716,FBgn0000244,FBgn0012344,FBgn0037719,FBgn0037730,Novel000145,FBgn0053654,FBgn0037717,FBgn0028997,FBgn0053105,FBgn0037731,FBgn0051352,FBgn0037710,FBgn0262477,FBgn0037722,FBgn0037707,FBgn0037726,FBgn0037712,FBgn0037721,FBgn0037723,FBgn0052939,FBgn0027338,FBgn0037727,FBgn0037709,FBg…
FBgn0266414	FBgn0027524,FBgn0037780,FBgn0086359,Novel000147,FBgn0045473,FBgn0037779,FBgn0037783,FBgn0037788,FBgn0037792,FBgn0037778,FBgn0037786,Novel000146,FBgn0051407,FBgn0037796,FBgn0037777,FBgn0040238,FBgn0085332,FBgn0037770,Novel000178,FBgn0037794,FBgn0041105,FBgn0053631,FBgn0037772,FBgn0053208,FBgn0037782,FBgn0004889,FBgn0261817,FBgn0037773,FBgn0001321,FBgn0051477,Novel000179,FBgn0053783,FBgn0037781,FBg…
FBgn0266415	FBgn0026064,FBgn0264694,FBgn0020910,FBgn0037879,FBgn0037884,FBgn0037875,FBgn0037883,FBgn0004595,FBgn0037885,FBgn0037891,FBgn0037877,FBgn0037892,FBgn0051441,FBgn0037880,FBgn0011774,FBgn0037890,FBgn0037882,FBgn0086472,FBgn0037874,FBgn0037888,FBgn0037876,FBgn0037889,FBgn0026063,FBgn0037881,FBgn0037878,FBgn0051388
FBgn0266416	FBgn0037910,FBgn0037911,FBgn0042205,FBgn0262081,FBgn0037922,FBgn0037924,FBgn0053512,FBgn0037913,FBgn0051374,FBgn0046225,FBgn0037915,FBgn0037908,FBgn0037920,FBgn0037917,FBgn0037902,FBgn0037916,FBgn0037912,FBgn0037906,FBgn0037918,FBgn0037923,FBgn0263316,FBgn0051363,FBgn0037921,FBgn0037901
FBgn0266419	FBgn0031129,FBgn0031126,FBgn0031128,FBgn0031127,FBgn0031130,FBgn0003300,FBgn0052507,FBgn0031132,FBgn0085387
FBgn0266457	FBgn0031178,FBgn0052857,FBgn0040028,FBgn0031176,FBgn0031182,FBgn0259245,FBgn0027588,Novel000209,FBgn0028583,FBgn0031181,FBgn0053502,FBgn0052820,FBgn0052819
FBgn0266535	FBgn0053262,FBgn0259971,FBgn0023095,FBgn0003034,FBgn0262623,FBgn0259970,FBgn0052119,FBgn0086916,FBgn0010452
FBgn0266536	FBgn0053262,FBgn0259971,FBgn0023095,FBgn0003034,FBgn0262623,FBgn0052119,FBgn0259970,FBgn0086916,FBgn0010452
FBgn0266537	FBgn0053262,FBgn0259971,FBgn0003034,FBgn0023095,FBgn0086916,FBgn0262623,FBgn0259970,FBgn0052119
FBgn0266549	FBgn0044046,FBgn0023215,FBgn0264954,FBgn0260484,FBgn0023216,FBgn0266429,FBgn0029676,Novel000200,FBgn0015286,FBgn0021738,FBgn0086899
FBgn0266564	FBgn0038585,FBgn0028499,FBgn0038577,FBgn0020238,FBgn0003499,FBgn0022943,FBgn0038566,FBgn0011701,FBgn0038578,FBgn0038576,FBgn0266195,FBgn0265041,FBgn0038569,FBgn0038589,FBgn0038582,FBgn0038584,FBgn0042693,FBgn0261019,FBgn0038570,FBgn0038581,FBgn0038579,FBgn0038583,FBgn0038571,FBgn0038590,FBgn0038575,FBgn0263738,FBgn0038567,FBgn0038586,FBgn0011481,FBgn0038588,FBgn0263757,FBgn0261532,FBgn0038568,FBg…
FBgn0266578	FBgn0038126,FBgn0038113,FBgn0260793,FBgn0085337,FBgn0038118,FBgn0051157,FBgn0038127,FBgn0003450,FBgn0262365,FBgn0000024,FBgn0004666,FBgn0266615,FBgn0038115,FBgn0260962,FBgn0038125,FBgn0038123,FBgn0038122,FBgn0001217,FBgn0038124,FBgn0038114,FBgn0003308
FBgn0266586	FBgn0003187,FBgn0032648,FBgn0032645,FBgn0032646,FBgn0032652,FBgn0015609,FBgn0032651,FBgn0262857,FBgn0032654,FBgn0032644,FBgn0263654,FBgn0262356,FBgn0032643,FBgn0261089,FBgn0032647,FBgn0032649,FBgn0032650,FBgn0013810,FBgn0262856
FBgn0266587	FBgn0032649,FBgn0261089,FBgn0032647,FBgn0032650,FBgn0013810,FBgn0262856,FBgn0032654,FBgn0262857,FBgn0263654,FBgn0262356,FBgn0032644,FBgn0032652,FBgn0032646,FBgn0032651,FBgn0015609,FBgn0032648,FBgn0003187,FBgn0032645
FBgn0266588	FBgn0261631,FBgn0001258,FBgn0047334,FBgn0035696,FBgn0041623,FBgn0035695,FBgn0035699,FBgn0004513,FBgn0262787,FBgn0261801,FBgn0041624,FBgn0041625,FBgn0035694,FBgn0002526,FBgn0035697,FBgn0259969,FBgn0047000
FBgn0266589	FBgn0035699,FBgn0035695,FBgn0004513,FBgn0001258,FBgn0261631,FBgn0041623,FBgn0047334,FBgn0035696,FBgn0047000,FBgn0259969,FBgn0262787,FBgn0261801,FBgn0041624,FBgn0002526,FBgn0035697,FBgn0041625,FBgn0035694
FBgn0266592	FBgn0085298,FBgn0035140,FBgn0035142,FBgn0035144,FBgn0001316,FBgn0016715,FBgn0263042,FBgn0035146,FBgn0085296,FBgn0035143,Novel000126,FBgn0035145,Novel000101,FBgn0085297,FBgn0035139,FBgn0035141
FBgn0266593	FBgn0035139,FBgn0035141,FBgn0085297,Novel000101,Novel000126,FBgn0035145,FBgn0035143,FBgn0035146,FBgn0085296,FBgn0263042,FBgn0035144,FBgn0001316,FBgn0016715,FBgn0035142,FBgn0035140,FBgn0085298
FBgn0266594	FBgn0052074,FBgn0052075,FBgn0083068,FBgn0013469,FBgn0052073,FBgn0261112,FBgn0036136,FBgn0036121,FBgn0036112,FBgn0260795,FBgn0036128,FBgn0266540,FBgn0036139,FBgn0052081,FBgn0010741,FBgn0036117,FBgn0003462,FBgn0029172,FBgn0054012,FBgn0036134,FBgn0036125,FBgn0020412,FBgn0036138,FBgn0014368,FBgn0052071,FBgn0052082,FBgn0052069,FBgn0036116,FBgn0052079,FBgn0036135,FBgn0036133,FBgn0263241,FBgn0036126,FBg…
FBgn0266595	FBgn0086785,FBgn0036374,FBgn0264001,FBgn0036376,FBgn0036377,FBgn0036373
FBgn0266596	FBgn0045823,FBgn0087040,FBgn0259163,FBgn0261530,FBgn0261555,FBgn0036035,FBgn0036040,FBgn0036024,FBgn0036031,FBgn0036018,FBgn0036039,FBgn0036044,FBgn0036043,FBgn0036014,FBgn0267796,FBgn0036020,FBgn0044328,FBgn0036023,FBgn0036028,FBgn0036030,FBgn0036015,FBgn0036038,FBgn0016081,FBgn0015321,FBgn0036036,FBgn0040475,FBgn0036029,FBgn0036022,FBgn0036032,FBgn0036019,FBgn0053696,FBgn0019644,FBgn0267348,FBg…
FBgn0266616	FBgn0052016,FBgn0023213,FBgn0039938,FBgn0039939,FBgn0025726,FBgn0019985,FBgn0005666,FBgn0039923,FBgn0039937,FBgn0039936
FBgn0266617	FBgn0052000,FBgn0267363,FBgn0085432,FBgn0017545,FBgn0004859,FBgn0025740,FBgn0011747
FBgn0266618	FBgn0039907,FBgn0259214,Novel000192,FBgn0026262,FBgn0052850,FBgn0039908,Novel000198,FBgn0039904,FBgn0039900,Novel000193,FBgn0262636,FBgn0016126,Novel000194,Novel000195,FBgn0039902,FBgn0026777,Novel000197,Novel000196
FBgn0266619	FBgn0016126,Novel000194,FBgn0262636,FBgn0022361,FBgn0039904,Novel000193,Novel000196,Novel000197,FBgn0004607,Novel000195,FBgn0039907,FBgn0039908,Novel000198,FBgn0026262,Novel000192,FBgn0026869
FBgn0266620	Novel000052,FBgn0033076,Novel000051,FBgn0086655
FBgn0266621	FBgn0033089,FBgn0033079,FBgn0033092,FBgn0010482,FBgn0259483,FBgn0033095,FBgn0050443,FBgn0262736,FBgn0050446,FBgn0033100,FBgn0033096,FBgn0033090,FBgn0026761,FBgn0033087,FBgn0033093,FBgn0033088,FBgn0259977,FBgn0033085,FBgn0266518,FBgn0028579,FBgn0033097,FBgn0000054,FBgn0027066,FBgn0033081,FBgn0013732,FBgn0033086,FBgn0266525,FBgn0053919,FBgn0014009,FBgn0042085,FBgn0042083,FBgn0085421,FBgn0086655,FBg…
FBgn0266622	FBgn0003174,FBgn0260991,FBgn0033153,FBgn0033155,FBgn0033160,FBgn0033158,FBgn0033166,FBgn0033164,FBgn0033159,FBgn0033167,FBgn0262583,FBgn0033168,FBgn0033154,FBgn0000352,FBgn0041243,FBgn0026602,FBgn0262948,FBgn0026389,FBgn0003460,FBgn0033162,FBgn0033165
FBgn0266623	FBgn0264294,FBgn0050495,FBgn0050499,FBgn0033192,FBgn0004132,FBgn0033187,FBgn0259745,FBgn0033184,FBgn0033205,FBgn0033207,FBgn0033210,FBgn0033190,FBgn0033206,FBgn0033183,FBgn0033212,FBgn0025185,FBgn0050491,FBgn0033203,FBgn0022772,FBgn0261385,FBgn0028687,FBgn0033204,FBgn0033208,FBgn0033209,FBgn0004133,FBgn0263077,FBgn0033191,FBgn0033202,FBgn0033196,FBgn0033194,FBgn0033199,FBgn0033186,FBgn0261397,FBg…
FBgn0266624	FBgn0033205,FBgn0033215,FBgn0050495,FBgn0264294,FBgn0050499,FBgn0033192,FBgn0004132,FBgn0042135,FBgn0033190,FBgn0033206,FBgn0033212,FBgn0050491,FBgn0033207,FBgn0033214,FBgn0050496,FBgn0050493,FBgn0085245,FBgn0033210,FBgn0028687,FBgn0033208,FBgn0033216,FBgn0033204,FBgn0004133,FBgn0033209,FBgn0033203,FBgn0261385,FBgn0263046,FBgn0003733,FBgn0033188,FBgn0033195,FBgn0263077,FBgn0033202,FBgn0033191,FBg…
FBgn0266625	FBgn0083977,FBgn0266486,FBgn0033403,FBgn0015037,FBgn0002567,FBgn0033402,FBgn0033400,FBgn0033392,FBgn0033404,FBgn0026326,FBgn0033395,FBgn0040775,FBgn0050343,FBgn0020621,FBgn0033397,FBgn0015561,FBgn0028408,FBgn0033391,FBgn0033405,FBgn0010114,FBgn0033401,FBgn0262515
FBgn0266626	FBgn0010531,FBgn0003071,FBgn0033491,FBgn0005619,FBgn0265512,FBgn0033483,FBgn0085250,FBgn0033497,FBgn0033498,FBgn0003660,FBgn0033494,FBgn0010385,FBgn0033484,FBgn0033499,FBgn0033479,FBgn0033482,FBgn0000448,FBgn0028560,FBgn0001291,FBgn0033486,FBgn0004907,FBgn0050011,FBgn0033490,FBgn0033500,FBgn0026388,FBgn0013435,FBgn0033481,FBgn0033480,FBgn0262169,FBgn0033485
FBgn0266627	FBgn0033519,FBgn0262114,FBgn0053475,FBgn0033526,FBgn0033527,FBgn0005630,FBgn0033529,FBgn0033516,FBgn0033520,FBgn0033528,FBgn0033518,FBgn0263102,FBgn0053477,FBgn0033515,FBgn0033523,FBgn0053474,FBgn0033524,FBgn0001122,FBgn0053476,FBgn0033521,FBgn0261862,FBgn0264817,FBgn0261698
FBgn0266628	FBgn0005630,FBgn0264817,FBgn0033529,FBgn0261862,FBgn0263102,FBgn0033528,FBgn0001122,FBgn0033524,FBgn0033538,FBgn0033539,FBgn0033526,FBgn0033527
FBgn0266629	FBgn0050016,FBgn0050018,FBgn0033555,FBgn0027525,FBgn0053144,FBgn0033570,FBgn0033569,FBgn0010356,FBgn0033550,FBgn0017414,Novel000059,FBgn0033548,FBgn0033557,FBgn0050015,FBgn0050020,FBgn0033572,FBgn0033564,FBgn0033549,FBgn0263510,FBgn0033556,FBgn0033554,FBgn0033547,FBgn0033573,FBgn0033566,FBgn0086898,FBgn0033551,FBgn0029134,FBgn0061356,FBgn0033571,FBgn0033558,FBgn0027499,FBgn0033574
FBgn0266630	FBgn0003326,FBgn0013305,FBgn0033775,Novel000091,FBgn0028963,FBgn0026619,FBgn0033766,FBgn0250842,FBgn0025692,FBgn0261545,FBgn0011227,FBgn0033773,FBgn0033769,FBgn0086904,Novel000066,FBgn0050053,FBgn0026741,FBgn0020930,FBgn0033767,FBgn0040755,FBgn0050488,FBgn0000181,FBgn0002069,Novel000065,FBgn0050486,FBgn0033777,FBgn0050052,FBgn0033774,FBgn0033770,FBgn0003975,FBgn0033778
FBgn0266631	FBgn0033464,FBgn0033446,FBgn0033466,FBgn0011656,FBgn0050010,FBgn0050007,FBgn0027619,FBgn0033469,FBgn0033467,FBgn0000715,FBgn0266186,FBgn0033457,FBgn0033451,FBgn0050001,FBgn0033468,FBgn0033463,FBgn0033447,FBgn0023175,FBgn0040093,FBgn0027589,FBgn0050008,FBgn0033443,FBgn0033461,FBgn0033465,FBgn0040092,FBgn0033453,FBgn0033449,FBgn0033450,FBgn0033454,FBgn0054033,FBgn0033458,FBgn0033459,FBgn0027580,FBg…
FBgn0266632	FBgn0046706,FBgn0262124
FBgn0266633	FBgn0050486,FBgn0033777,FBgn0002069,Novel000065,FBgn0005624,FBgn0265185,FBgn0033785,FBgn0033787,FBgn0265186,FBgn0033778,FBgn0003975,FBgn0050487,FBgn0040755,FBgn0033784,FBgn0050488,FBgn0000181,FBgn0010488,Novel000066,FBgn0004512,FBgn0033782,FBgn0033775,FBgn0003326,FBgn0013305,Novel000091,FBgn0028963,FBgn0025692,FBgn0250842,FBgn0033783,FBgn0033781
FBgn0266634	FBgn0025692,FBgn0250842,FBgn0033783,FBgn0033781,FBgn0033775,FBgn0013305,FBgn0003326,Novel000091,FBgn0028963,FBgn0033782,Novel000066,FBgn0004512,FBgn0033784,FBgn0000181,FBgn0050488,FBgn0010488,FBgn0050487,FBgn0040755,FBgn0033785,FBgn0005624,FBgn0265185,FBgn0033787,FBgn0265186,FBgn0033778,FBgn0003975,FBgn0050486,FBgn0033777,Novel000065,FBgn0002069
FBgn0266635	FBgn0033799,FBgn0011763,FBgn0033815,FBgn0033808,FBgn0033792,FBgn0033794,FBgn0033809,FBgn0028991,FBgn0053138,FBgn0265429,FBgn0033819,FBgn0040754,FBgn0033814,FBgn0033802,FBgn0043010,FBgn0020391,FBgn0085468,FBgn0052843,FBgn0086532,FBgn0033807,FBgn0033821,FBgn0053137,FBgn0085264,FBgn0259876,FBgn0259219,FBgn0033816,FBgn0033813,FBgn0085341,FBgn0033810,FBgn0033798,FBgn0027079,FBgn0002789,FBgn0033791,FBg…
FBgn0266636	FBgn0053460,FBgn0034035,FBgn0265991,FBgn0266708,FBgn0262512,FBgn0050090,FBgn0050091,FBgn0050089,FBgn0023441,FBgn0260429,FBgn0053139,FBgn0050080,FBgn0050088,FBgn0050087,FBgn0050082,FBgn0050083,FBgn0261538,FBgn0053462,FBgn0053461
FBgn0266637	FBgn0034182,FBgn0263033,FBgn0034200,FBgn0034191,FBgn0034168,FBgn0034186,FBgn0034177,FBgn0023172,FBgn0034172,FBgn0034195,Novel000098,FBgn0034176,FBgn0034196,FBgn0264329,FBgn0026402,FBgn0050460,FBgn0263032,FBgn0263114,FBgn0034173,FBgn0000078,FBgn0010226,Novel000099,FBgn0263864,FBgn0050461,FBgn0085444,FBgn0264330,FBgn0004580,FBgn0034194,FBgn0034179,FBgn0000079,FBgn0083936,FBgn0003091,FBgn0265174,FBg…
FBgn0266638	FBgn0263114,FBgn0034173,FBgn0050460,FBgn0026402,FBgn0263032,Novel000099,FBgn0000078,FBgn0010226,FBgn0004580,FBgn0034194,FBgn0034179,FBgn0000079,FBgn0263864,FBgn0085444,FBgn0050461,FBgn0263033,FBgn0034182,FBgn0034200,FBgn0034191,FBgn0023172,FBgn0034172,FBgn0034168,FBgn0034177,FBgn0034186,FBgn0034196,Novel000098,FBgn0034195,FBgn0034176,FBgn0085220,FBgn0034199,FBgn0085219,FBgn0034197,FBgn0034175,FBg…
FBgn0266639	FBgn0034277,FBgn0034253,FBgn0027872,FBgn0028741,FBgn0028494,FBgn0264541,FBgn0050108,FBgn0034275,FBgn0028740,FBgn0034279,FBgn0016059,FBgn0250851,FBgn0034271,FBgn0034266,FBgn0034267,FBgn0034255,FBgn0034265,FBgn0026316,FBgn0034270,FBgn0034274,FBgn0028743,FBgn0029006,FBgn0034272,FBgn0050106,FBgn0028744,FBgn0034259,FBgn0085224,FBgn0050109,FBgn0022740,FBgn0261501,FBgn0034264,FBgn0260763,FBgn0034261,FBg…
FBgn0266640	FBgn0034308,FBgn0034312,FBgn0022238,FBgn0034325,FBgn0001222,FBgn0034310,FBgn0034324,FBgn0034318,FBgn0062440,FBgn0034321,FBgn0034322,FBgn0003044,FBgn0034323,FBgn0040465,FBgn0000057,FBgn0000658,FBgn0010575,FBgn0053198,FBgn0034327,FBgn0034304,FBgn0034326,FBgn0034317,FBgn0027836,FBgn0028983,FBgn0266420,FBgn0260401,FBgn0003520,FBgn0034314,FBgn0050114,FBgn0260392,FBgn0265297,FBgn0034307,FBgn0034313,FBg…
FBgn0266641	FBgn0083951,FBgn0020617,FBgn0020312,FBgn0008636,FBgn0022700,FBgn0000044,FBgn0034565,FBgn0261394,FBgn0050291,FBgn0034570,FBgn0034568,FBgn0034578,FBgn0034576,FBgn0050293,FBgn0034582,FBgn0003748,FBgn0034564,FBgn0034590,FBgn0034585,FBgn0034579,FBgn0034566,FBgn0053704,FBgn0034567,FBgn0050296,FBgn0034577,FBgn0001133,FBgn0034572,FBgn0034583,FBgn0034573,FBgn0034569,FBgn0085425,FBgn0034588,FBgn0011824,FBg…
FBgn0266642	FBgn0034624,FBgn0261554,FBgn0034627,FBgn0050393,FBgn0265180,FBgn0034626,FBgn0034623,FBgn0034612,FBgn0034629,FBgn0027073,FBgn0085232,FBgn0034611,FBgn0250824,FBgn0034628,FBgn0050391,FBgn0020306,FBgn0034606,FBgn0034618,FBgn0034614,FBgn0010415,FBgn0265191,FBgn0085426,FBgn0016726,FBgn0050390,FBgn0050394,FBgn0034622,FBgn0050392,FBgn0000395,FBgn0034605,FBgn0034617
FBgn0266643	FBgn0034645,FBgn0259727,FBgn0034647,FBgn0266346,FBgn0034638,FBgn0050286,FBgn0042180,FBgn0034643,FBgn0010228,FBgn0050222,FBgn0260223,FBgn0050287,FBgn0003687,FBgn0034642,FBgn0003731,FBgn0259726,FBgn0000326,FBgn0259711,FBgn0050263,FBgn0259710,FBgn0034650,FBgn0016641,FBgn0034641,FBgn0260477,FBgn0260222,FBgn0259725,FBgn0027360,FBgn0050285,FBgn0034644,Novel000071,FBgn0034634,FBgn0050288,FBgn0259709,FBg…
FBgn0266644	FBgn0034716,FBgn0067102,FBgn0034712,FBgn0034703,FBgn0034692,FBgn0050280,FBgn0034693,FBgn0029084,FBgn0050278,FBgn0034715,FBgn0034711,FBgn0050277,FBgn0263250,FBgn0000008,FBgn0020307,FBgn0034706,FBgn0034709,FBgn0034697,FBgn0029147,FBgn0085235,FBgn0034705,FBgn0265046,FBgn0002715,FBgn0034691,FBgn0034710,FBgn0034713,FBgn0025186,FBgn0243516,FBgn0034704,FBgn0034689,FBgn0034707,FBgn0034694,FBgn0050281,FBg…
FBgn0266645	FBgn0034735,FBgn0034728,FBgn0022986,FBgn0022985,FBgn0034734,FBgn0022984,FBgn0034724,FBgn0266432,FBgn0053200,FBgn0266433,FBgn0003175,FBgn0017482,FBgn0034720,FBgn0085237,FBgn0034729,FBgn0013272,FBgn0085236,FBgn0016053,FBgn0034731,FBgn0034722,FBgn0034733,FBgn0034725,FBgn0034730,FBgn0034727,FBgn0025878,FBgn0034726,FBgn0034721,FBgn0034723
FBgn0266646	FBgn0015277,FBgn0041234,FBgn0015903,FBgn0041233,FBgn0000241,FBgn0034897,FBgn0034893,FBgn0034882,FBgn0260455,FBgn0034878,FBgn0260761,FBgn0265052,FBgn0260762,FBgn0034898,FBgn0013548,FBgn0034885,FBgn0050183,FBgn0034880,FBgn0002174,FBgn0034883,FBgn0034894,FBgn0262845,FBgn0262728,FBgn0050181,FBgn0011297,FBgn0034877,FBgn0034884,FBgn0266377,FBgn0016762,FBgn0034887,FBgn0000562,FBgn0011296,FBgn0034879,FBg…
FBgn0266648	FBgn0259932,FBgn0040823,FBgn0026404,FBgn0262007,FBgn0036063,FBgn0052054,FBgn0036062,FBgn0052053,FBgn0263251,FBgn0085385,FBgn0262008,FBgn0036066
FBgn0266649	FBgn0052251,FBgn0035528,FBgn0035537,FBgn0053514,FBgn0035524,FBgn0052250,FBgn0053764,FBgn0035520,FBgn0035526,FBgn0066365,FBgn0052240,FBgn0035522,FBgn0035529,FBgn0000038,FBgn0041171,FBgn0261952,FBgn0035545,FBgn0011692,FBgn0035541,FBgn0035519,FBgn0015829,FBgn0041630,FBgn0035538,FBgn0035518,FBgn0035533,FBgn0035532,FBgn0035544,FBgn0035521,FBgn0035534,FBgn0035542,FBgn0035540,FBgn0035543,FBgn0035517,FBg…
FBgn0266650	FBgn0010452,FBgn0085458,FBgn0036343,FBgn0260441,FBgn0036329,FBgn0036340,FBgn0266709,FBgn0036332,FBgn0036328,FBgn0036335,FBgn0083978,FBgn0036334,FBgn0036341,FBgn0036330,FBgn0036331,FBgn0036337,FBgn0085457,FBgn0036345,FBgn0036333,FBgn0041622,FBgn0011284,FBgn0036346,FBgn0036336,FBgn0036342,FBgn0036327,FBgn0036325
FBgn0266651	FBgn0052091,FBgn0036177,FBgn0036183,FBgn0036180,FBgn0036195,FBgn0036187,FBgn0036173,FBgn0259481,FBgn0036184,FBgn0052086,FBgn0053490,FBgn0036193,FBgn0052088,FBgn0036181,FBgn0052085,FBgn0263247,FBgn0053267,FBgn0053269,FBgn0052087,FBgn0262021,FBgn0003292,FBgn0036196,FBgn0261381,FBgn0036198,FBgn0036179,FBgn0036199,FBgn0042138,FBgn0086254,FBgn0036186,FBgn0040817,FBgn0036194,FBgn0053489,FBgn0053271,FBg…
FBgn0266652	FBgn0011288,FBgn0259697
FBgn0266653	FBgn0035589,FBgn0035593,FBgn0035591,FBgn0035588,FBgn0028962,FBgn0035586,FBgn0052423,FBgn0005775,FBgn0035598,FBgn0010747,FBgn0035590,FBgn0263831,FBgn0035592,FBgn0040842,FBgn0040843,FBgn0035594,FBgn0035587
FBgn0266654	FBgn0036934,FBgn0005633,FBgn0028695,FBgn0261574,FBgn0052220,FBgn0014037,FBgn0052219,FBgn0036918,FBgn0036927,FBgn0261507,FBgn0036923,FBgn0262519,FBgn0036919,FBgn0053710,FBgn0259148,FBgn0004852,FBgn0036926,FBgn0036932,FBgn0036921,FBgn0036922,FBgn0036928,FBgn0013303,FBgn0036924,FBgn0036929,FBgn0036915,FBgn0036916,FBgn0020887,FBgn0085287,FBgn0036931,FBgn0036925,FBgn0261506,FBgn0036920
FBgn0266655	FBgn0037067,FBgn0053054,FBgn0053056,FBgn0037074,FBgn0024150,FBgn0262855,FBgn0037070,FBgn0041100,FBgn0270926,FBgn0052437,FBgn0037076,FBgn0021760,FBgn0263841,FBgn0037061,FBgn0037069,FBgn0037060,FBgn0003042,FBgn0052440,FBgn0262854,FBgn0004865,FBgn0259239,FBgn0037068,FBgn0037064,FBgn0037065,FBgn0085290,FBgn0037057,FBgn0000551,FBgn0037073,FBgn0037078,FBgn0027945,FBgn0052436,FBgn0037059,FBgn0086913,FBg…
FBgn0266656	FBgn0052452,FBgn0037174,FBgn0037176,FBgn0037195,FBgn0010830,FBgn0037178,FBgn0037180,FBgn0053772,FBgn0037175,FBgn0053771,FBgn0037188,FBgn0037184,FBgn0037179,FBgn0053770,FBgn0052451,FBgn0037186,FBgn0260481,FBgn0037185,FBgn0037182,FBgn0053769,FBgn0037191,FBgn0027339,FBgn0037181,FBgn0266591,FBgn0053766,FBgn0037183,FBgn0037177,FBgn0053767,FBgn0016034,FBgn0052453,FBgn0053768,FBgn0266977
FBgn0266657	Novel000115,FBgn0266347,FBgn0052350,FBgn0264492,FBgn0054031,FBgn0053217,FBgn0024733
FBgn0266675	FBgn0036735,FBgn0036729,FBgn0036740,FBgn0036723,FBgn0036734,FBgn0052176,FBgn0036733,FBgn0036738,FBgn0036726,FBgn0036730,FBgn0023197,FBgn0036725,FBgn0042641,FBgn0000567,FBgn0036727,FBgn0025455,FBgn0036728,FBgn0036731,FBgn0036732,FBgn0259174,FBgn0085279,FBgn0052185,FBgn0036741,FBgn0052174
FBgn0266676	FBgn0010786,FBgn0035216,FBgn0264272,FBgn0035218,FBgn0035208,FBgn0262937,FBgn0035193,FBgn0035210,FBgn0035197,FBgn0035198,FBgn0035192,FBgn0052320,FBgn0052333,FBgn0035195,FBgn0035204,FBgn0053965,FBgn0004378,FBgn0035213,FBgn0267487,FBgn0053966,FBgn0035199,FBgn0004430,FBgn0035211,FBgn0035205,FBgn0029514,FBgn0035196,FBgn0035209,FBgn0035194,FBgn0010333,FBgn0035203,FBgn0035206,FBgn0025682,FBgn0003295,FBg…
FBgn0266677	FBgn0035649,FBgn0002638,FBgn0035656,FBgn0035647,FBgn0035642,FBgn0003984,FBgn0035643,FBgn0035645,FBgn0052406,FBgn0053523,FBgn0035648,FBgn0035641,FBgn0035644,FBgn0052413,FBgn0052409,FBgn0053993,FBgn0052407,FBgn0035657,FBgn0052412
FBgn0266678	FBgn0085271,FBgn0036291,FBgn0036287,FBgn0036299,FBgn0036300,FBgn0053725,FBgn0015904,FBgn0036301,FBgn0015919,FBgn0004926,FBgn0036294,FBgn0036285,FBgn0262524,FBgn0036289,FBgn0052102,FBgn0020388,FBgn0036288,FBgn0036286,FBgn0002466,FBgn0036292,FBgn0036298,FBgn0041775,FBgn0264848,FBgn0020655,FBgn0052103,FBgn0036290,FBgn0036302,FBgn0000625
FBgn0266679	FBgn0036108,FBgn0036104,FBgn0036107,FBgn0036102,FBgn0036105,FBgn0026160,FBgn0036109,FBgn0036106,FBgn0262020,FBgn0027615,FBgn0036111,FBgn0262890,FBgn0036110
FBgn0266680	FBgn0062517,FBgn0035355,FBgn0035346,FBgn0011828,FBgn0266696,FBgn0010905,FBgn0035348,FBgn0035343,FBgn0010909,FBgn0028504,FBgn0260480,FBgn0035344,FBgn0261602,FBgn0035356,FBgn0016794
FBgn0266681	FBgn0027615,FBgn0036109,FBgn0036106,FBgn0262020,FBgn0026160,FBgn0013469,FBgn0036110,FBgn0036111,FBgn0036108,FBgn0036102,FBgn0036105,FBgn0036107,FBgn0036112,FBgn0036104
FBgn0266682	FBgn0085458,FBgn0036343,FBgn0260441,FBgn0010452,FBgn0036340,FBgn0036329,FBgn0266709,FBgn0036328,FBgn0036335,FBgn0036332,FBgn0036341,FBgn0036334,FBgn0083978,FBgn0036337,FBgn0085457,FBgn0036331,FBgn0036330,FBgn0011284,FBgn0041622,FBgn0036333,FBgn0036345,FBgn0036346,FBgn0036336,FBgn0036325,FBgn0036327,FBgn0036342
FBgn0266683	FBgn0004619,FBgn0035715,FBgn0035707,FBgn0035711,FBgn0052392,FBgn0035713,FBgn0042185,FBgn0024177,FBgn0035714,FBgn0035708,FBgn0261934,FBgn0035710,FBgn0005626,FBgn0035709,FBgn0002926,FBgn0041232,FBgn0263973
FBgn0266684	FBgn0039977,FBgn0040056,FBgn0058298,FBgn0264699,FBgn0250816
FBgn0266685	FBgn0036756,FBgn0036769,FBgn0036772,FBgn0036760,FBgn0052189,FBgn0036770,FBgn0036757,FBgn0052191,FBgn0036761,FBgn0036749,FBgn0036766,FBgn0036763,Novel000107,FBgn0001134,FBgn0052187,FBgn0036771,FBgn0052183,FBgn0054002,FBgn0036768,FBgn0261401,FBgn0261998,FBgn0036765,FBgn0036752,FBgn0261402,FBgn0043025,FBgn0036751,FBgn0036759,FBgn0036750,FBgn0036762,FBgn0036754,FBgn0036764,FBgn0052190,FBgn0052182,FBg…
FBgn0266686	FBgn0037001,FBgn0036995,FBgn0036980,FBgn0052428,FBgn0036987,FBgn0036994,FBgn0036991,FBgn0261832,FBgn0036999,FBgn0001259,FBgn0036996,FBgn0036985,FBgn0036974,FBgn0037004,FBgn0036978,FBgn0011205,FBgn0036979,FBgn0036998,FBgn0036970,FBgn0037007,FBgn0036993,FBgn0036973,FBgn0036977,FBgn0019947,FBgn0027565,FBgn0036992,FBgn0259676,FBgn0037003,FBgn0037009,FBgn0036988,FBgn0036984,FBgn0036990,FBgn0024887,FBg…
FBgn0266687	FBgn0260987,FBgn0063670
FBgn0266688	FBgn0036368,FBgn0036374,FBgn0086785,FBgn0036377,FBgn0036373,FBgn0086708,FBgn0036369,FBgn0036372,FBgn0036376,FBgn0264001
FBgn0266689	FBgn0036659,FBgn0036652,FBgn0036654,FBgn0036661,FBgn0036662,FBgn0004465,FBgn0262099,FBgn0004556,FBgn0003741,FBgn0000414,FBgn0040512,FBgn0036663,FBgn0043577,FBgn0010223,FBgn0036648,FBgn0002283,FBgn0036655,FBgn0000017,FBgn0063485,FBgn0025582,FBgn0017572,FBgn0002284,FBgn0004108,FBgn0036656,FBgn0260960,FBgn0043578,FBgn0042177,FBgn0027500,FBgn0042178,FBgn0036660,FBgn0025558,FBgn0264605
FBgn0266690	Novel000122,FBgn0267429,FBgn0040001,FBgn0058178
FBgn0266691	FBgn0063670,FBgn0260987
FBgn0266692	FBgn0058178,FBgn0040001
FBgn0266693	FBgn0263873,FBgn0032839,FBgn0032840,FBgn0042129,FBgn0032835,FBgn0032827,FBgn0264443,FBgn0014000,FBgn0053117,FBgn0054051,FBgn0032833,FBgn0044811,FBgn0032836,FBgn0262140,FBgn0032834
FBgn0266697	FBgn0051522,FBgn0037244,FBgn0037254,FBgn0037255,FBgn0037250,FBgn0040687,FBgn0086608,FBgn0263594,FBgn0037241,FBgn0037235,FBgn0037248,FBgn0261086,FBgn0037249,FBgn0037236,FBgn0037232,FBgn0037252,FBgn0003882,FBgn0041605,FBgn0037251,FBgn0027930,FBgn0037239,FBgn0051523,FBgn0037234,FBgn0037231,FBgn0037238,FBgn0261434,FBgn0037240,FBgn0051525,FBgn0085386,FBgn0051528,FBgn0086605,FBgn0037242,FBgn0027866,FBg…
FBgn0266698	FBgn0265082,FBgn0250839,FBgn0037290,FBgn0003002,FBgn0020280,FBgn0037291,FBgn0004913,FBgn0037288,FBgn0004436,FBgn0037292,Novel000141
FBgn0266699	FBgn0039800,FBgn0000416,FBgn0039799,FBgn0004606,FBgn0039798,FBgn0003720,FBgn0011739,FBgn0039797,FBgn0039804,FBgn0051010,FBgn0000274,FBgn0039806,FBgn0039809,FBgn0039801,FBgn0039805,FBgn0027598,FBgn0039796,FBgn0039802,FBgn0039808,FBgn0039795,FBgn0039807
FBgn0266700	FBgn0028968,FBgn0039858,FBgn0043900,FBgn0011655,FBgn0039860,FBgn0039861,FBgn0039855,FBgn0039863,FBgn0039854,FBgn0039856,FBgn0039864,FBgn0039857,FBgn0039859,FBgn0039862,FBgn0039852,FBgn0003268,FBgn0039851
FBgn0266701	FBgn0051013,FBgn0039795,FBgn0039787,FBgn0085461,FBgn0039789,FBgn0051016,FBgn0039801,FBgn0051021,FBgn0039788,FBgn0039796,FBgn0051017,FBgn0000274,FBgn0051010,FBgn0039797,FBgn0051015,FBgn0082582,FBgn0039790,FBgn0266259,FBgn0039800,FBgn0039792,FBgn0004606,FBgn0039799,FBgn0051019,FBgn0039798,FBgn0085462
FBgn0266702	FBgn0037386,FBgn0263353,FBgn0037387,FBgn0261561,FBgn0037374,FBgn0028690,FBgn0037385,FBgn0028436,FBgn0037377,FBgn0037369,FBgn0037388,FBgn0037382,FBgn0037375,FBgn0027608,FBgn0037372,FBgn0266672,FBgn0085316,FBgn0037378,FBgn0029088,FBgn0037376,Novel000169,FBgn0037371,FBgn0027497,FBgn0037370,FBgn0037379,FBgn0037391,FBgn0037384,FBgn0037383,FBgn0083949
FBgn0266703	FBgn0038412,FBgn0027095,FBgn0051279,FBgn0038425,FBgn0038432,FBgn0038423,FBgn0040271,FBgn0038427,FBgn0264836,FBgn0038426,FBgn0259917,FBgn0038424,FBgn0038422,FBgn0038435,FBgn0038420,FBgn0038418,FBgn0040284,FBgn0038415,FBgn0038414,FBgn0038421,FBgn0261286,FBgn0250754,FBgn0038416,FBgn0027053,FBgn0038428,FBgn0038419,FBgn0038429,FBgn0044826,FBgn0038431,FBgn0250823,FBgn0003513
FBgn0266705	FBgn0037838,FBgn0037836,FBgn0011768,FBgn0261356,FBgn0037832,FBgn0261380,FBgn0022359,FBgn0267376,FBgn0017577,FBgn0037835,FBgn0037846,FBgn0037844,FBgn0037834,FBgn0266446,FBgn0037856,FBgn0037853,FBgn0083950,FBgn0261053,FBgn0042094,FBgn0037855,FBgn0037845,FBgn0266448,FBgn0037842,FBgn0037849,FBgn0037843,FBgn0266451,FBgn0037852,FBgn0037848,FBgn0037841,FBgn0037857,FBgn0260944,FBgn0037850,FBgn0259740,FBg…
FBgn0266706	FBgn0037672,FBgn0010803,FBgn0037669,FBgn0003165,FBgn0037675,FBgn0037671,FBgn0037662,FBgn0037664,FBgn0260935,FBgn0037670,FBgn0037667,Novel000144,FBgn0261241,FBgn0037676,FBgn0037668,FBgn0037665,FBgn0000412,FBgn0037677
FBgn0266707	FBgn0029629,FBgn0024973,FBgn0004643,FBgn0024997,FBgn0003371,FBgn0024998,FBgn0024980,FBgn0024977,FBgn0260753,FBgn0000376,FBgn0040376,FBgn0003068,FBgn0040375,FBgn0000092,FBgn0267350,FBgn0000520,FBgn0040066,FBgn0024975,FBgn0028369,FBgn0024996,FBgn0000928,FBgn0024994,FBgn0011566,FBgn0024991,FBgn0024992,FBgn0040333,FBgn0250874,FBgn0025838,FBgn0024995,FBgn0024993,FBgn0040334,FBgn0040336,FBgn0011606,FBg…
FBgn0266725	FBgn0039889,FBgn0039890,FBgn0024811,FBgn0039897,FBgn0011747,FBgn0259216,FBgn0053978,FBgn0051999,FBgn0052000,FBgn0051998,FBgn0039896,FBgn0042696,FBgn0085432,FBgn0053481,FBgn0052006,FBgn0051997
FBgn0266726	FBgn0025936,FBgn0039909,FBgn0026869,FBgn0040324,FBgn0039911,FBgn0026199,FBgn0039914,FBgn0005558,FBgn0028996,FBgn0004607,FBgn0024728,FBgn0039915,FBgn0022361,FBgn0039920,FBgn0039916,FBgn0051992
FBgn0266727	FBgn0005666,FBgn0026199,FBgn0025726,FBgn0039920,FBgn0039936,FBgn0039937,FBgn0039923,FBgn0005558,FBgn0039939,FBgn0039938
FBgn0266728	FBgn0025726,FBgn0264607,FBgn0019985,FBgn0025741,FBgn0039936,FBgn0011642,FBgn0039930,FBgn0010217,FBgn0023213,FBgn0019650,FBgn0052016,FBgn0039929,FBgn0039932
FBgn0266729	FBgn0033348,FBgn0033358,FBgn0085248,FBgn0033356,FBgn0004921,FBgn0033337,FBgn0027607,FBgn0011286,FBgn0265011,FBgn0011300,FBgn0003074,FBgn0002552,FBgn0050349,FBgn0033340,FBgn0033349,FBgn0024189,FBgn0033355,FBgn0033350,FBgn0050350,FBgn0033357,FBgn0033351,FBgn0021825,FBgn0033342,FBgn0053199,FBgn0033359,FBgn0033353,FBgn0033354,FBgn0033344,FBgn0033339,FBgn0033352,FBgn0033341,FBgn0033347,FBgn0027513
FBgn0266730	FBgn0014380,FBgn0037686,FBgn0037698,Novel000176,FBgn0037717,FBgn0083953,FBgn0043791,FBgn0003889,FBgn0053654,FBgn0265201,FBgn0037705,FBgn0037716,FBgn0000244,FBgn0037700,FBgn0037696,FBgn0024833,FBgn0003205,FBgn0037689,FBgn0027950,FBgn0000723,FBgn0014023,FBgn0037685,FBgn0261552,FBgn0037690,FBgn0267790,FBgn0261049,FBgn0011740,FBgn0037714,FBgn0037688,FBgn0037715,FBgn0037702,FBgn0027338,FBgn0014022,FBg…
FBgn0266731	FBgn0030240,FBgn0052672,FBgn0052676,FBgn0030234,FBgn0017561,FBgn0030243,FBgn0052677,FBgn0030237,FBgn0262735,FBgn0030241,FBgn0003204,FBgn0040850,FBgn0003360,FBgn0025111,FBgn0030246,FBgn0003321,FBgn0030228,FBgn0030242,FBgn0030244,FBgn0030239,FBgn0052675,FBgn0052669,FBgn0030245,FBgn0030230
FBgn0266732	FBgn0037772,FBgn0037773,FBgn0261817,FBgn0004889,FBgn0037782,FBgn0053208,FBgn0040238,FBgn0085332,FBgn0037770,FBgn0037777,FBgn0037794,FBgn0053631,FBgn0041105,Novel000178,FBgn0266721,FBgn0037781,FBgn0053783,FBgn0267336,FBgn0028734,FBgn0053784,FBgn0053630,FBgn0051410,FBgn0051477,FBgn0001321,Novel000179,FBgn0037788,FBgn0037783,FBgn0086359,FBgn0037780,FBgn0027524,FBgn0045473,FBgn0037779,Novel000147,FBg…
FBgn0266734	FBgn0038356,FBgn0017567,FBgn0038361,FBgn0038355,FBgn0051446,FBgn0038359,FBgn0085303,FBgn0038371,FBgn0038358,FBgn0003483,FBgn0265048,FBgn0263022,FBgn0038376,FBgn0038365,FBgn0038360,FBgn0051183,FBgn0000246,FBgn0038377,FBgn0038366,FBgn0051294,FBgn0038354,FBgn0038357,FBgn0026616,FBgn0038353,FBgn0263023,FBgn0038373,FBgn0038363,FBgn0003227,FBgn0038369,FBgn0262527,FBgn0053207
FBgn0266738	FBgn0038366,FBgn0051294,FBgn0038377,FBgn0000246,FBgn0026616,FBgn0263023,FBgn0038357,FBgn0038381,FBgn0038373,FBgn0038369,FBgn0262527,FBgn0027657,FBgn0038363,FBgn0003227,FBgn0038355,FBgn0038361,FBgn0038380,FBgn0038356,FBgn0017567,FBgn0266566,FBgn0085303,FBgn0038359,FBgn0003483,FBgn0038371,FBgn0038358,FBgn0265048,FBgn0051183,FBgn0038376,FBgn0263022,FBgn0038365,FBgn0038360
FBgn0266739	FBgn0038402,FBgn0003507,FBgn0038390,FBgn0051088,FBgn0038396,FBgn0038394,Novel000182,FBgn0038388,FBgn0002783,FBgn0024222,FBgn0022787,FBgn0038395,FBgn0052856,FBgn0027948,FBgn0026059,FBgn0010379,FBgn0038400,FBgn0052855,FBgn0003117,FBgn0038389,FBgn0038397,FBgn0013334,FBgn0038398,FBgn0038391,FBgn0003319,FBgn0038401
FBgn0266740	FBgn0038467,FBgn0004577,FBgn0038478,FBgn0266465,FBgn0038461,FBgn0020493,FBgn0038463,FBgn0038460,FBgn0038471,FBgn0038473,FBgn0051274,FBgn0038466,FBgn0038469,FBgn0015011,FBgn0038474,FBgn0038470,FBgn0038476,FBgn0038465,FBgn0266053,FBgn0014141,FBgn0266917,FBgn0051268,FBgn0038458,FBgn0038462,FBgn0038468,FBgn0043069,FBgn0038475,FBgn0015008,FBgn0038472,FBgn0000015
FBgn0266741	FBgn0039290,FBgn0045761,FBgn0039313,FBgn0039324,FBgn0051104,FBgn0039296,FBgn0022800,FBgn0039286,FBgn0039304,FBgn0051098,FBgn0039301,FBgn0051102,FBgn0039323,FBgn0039316,FBgn0000158,FBgn0039308,FBgn0083946,FBgn0051099,FBgn0039329,FBgn0027090,FBgn0039300,FBgn0027376,FBgn0039321,FBgn0039331,FBgn0051436,FBgn0039288,FBgn0039325,FBgn0039305,FBgn0028647,FBgn0039315,FBgn0261575,FBgn0051087,FBgn0039309,FBg…
FBgn0266742	FBgn0037571,FBgn0037556,FBgn0051464,FBgn0037570,FBgn0037579,FBgn0037578,FBgn0037566,FBgn0037565,FBgn0037555,FBgn0037562,FBgn0266801,FBgn0037576,FBgn0064126,FBgn0037583,FBgn0004908,FBgn0010433,FBgn0040529,FBgn0037574,FBgn0037561,FBgn0037569,FBgn0265351,FBgn0051463,FBgn0003129,FBgn0037554,FBgn0014861,FBgn0037584,FBgn0260386,FBgn0020249,FBgn0040528,FBgn0037581,FBgn0037553,FBgn0010173,FBgn0261108,FBg…
FBgn0266743	FBgn0043799,FBgn0039225,FBgn0039241,FBgn0039239,FBgn0039246,FBgn0039237,FBgn0039251,FBgn0004885,FBgn0051105,FBgn0039227,FBgn0039250,FBgn0000140,FBgn0051118,FBgn0045980,FBgn0013949,FBgn0020626,FBgn0053658,FBgn0039249,FBgn0015591,FBgn0259233,FBgn0039235,Novel000188,FBgn0039228,Novel000187,FBgn0039233,FBgn0027617,FBgn0039244,FBgn0051119,FBgn0262962,FBgn0003719,FBgn0051357,FBgn0083986,FBgn0039224,FBg…
FBgn0266744	FBgn0039167,FBgn0039182,FBgn0263398,FBgn0259685,FBgn0039156,FBgn0039155,FBgn0019952,FBgn0085319,FBgn0039172,FBgn0043884,FBgn0039180,FBgn0039170,FBgn0029503,FBgn0028471,FBgn0039163,FBgn0039159,FBgn0039165,FBgn0039158,FBgn0026257,FBgn0039153,FBgn0026598,FBgn0086365,FBgn0051133,FBgn0039177,FBgn0011785,FBgn0039160,FBgn0015765,FBgn0011225,FBgn0002863,FBgn0039175,FBgn0026317,FBgn0039178,FBgn0039154,FBg…
FBgn0266747	FBgn0267430
FBgn0266748	FBgn0038469,FBgn0015011,FBgn0038474,FBgn0038470,FBgn0038476,FBgn0038471,FBgn0038473,FBgn0038466,FBgn0051274,FBgn0038461,FBgn0020493,FBgn0038463,FBgn0038460,FBgn0038467,FBgn0038478,FBgn0266465,FBgn0004577,FBgn0015008,FBgn0038472,FBgn0000015,FBgn0043069,FBgn0038475,FBgn0038458,FBgn0051268,FBgn0266917,FBgn0038462,FBgn0038468,FBgn0266053,FBgn0038465,FBgn0014141
FBgn0266749	FBgn0038526,FBgn0261885,FBgn0038530,FBgn0038528,FBgn0038527,FBgn0264005,FBgn0004554,FBgn0025571,FBgn0038523,FBgn0003375,FBgn0016650,FBgn0261987,FBgn0038531,FBgn0038532,FBgn0038533,FBgn0051249,FBgn0085310,FBgn0038519,FBgn0038540,FBgn0010926,FBgn0038525,FBgn0038541,FBgn0038529,FBgn0051251,FBgn0262794,FBgn0038539,FBgn0038536,FBgn0000063,FBgn0038524,FBgn0051360,FBgn0040565,FBgn0038535
FBgn0266750	FBgn0261987,FBgn0051360,FBgn0003375,FBgn0016650,FBgn0038524,FBgn0051249,FBgn0085310,FBgn0038535,FBgn0038533,FBgn0040565,FBgn0038532,FBgn0038531,FBgn0262794,FBgn0038539,FBgn0004554,FBgn0038542,FBgn0000063,FBgn0038523,FBgn0038536,FBgn0038541,FBgn0038525,FBgn0264005,FBgn0051251,FBgn0038528,FBgn0038527,FBgn0038529,FBgn0038530,FBgn0038526,FBgn0038540,FBgn0261885
FBgn0266751	FBgn0051163,FBgn0051423,FBgn0259736,FBgn0038934,FBgn0038938,FBgn0051424,FBgn0263117,FBgn0051164,FBgn0038931
FBgn0266752	FBgn0039354,FBgn0039349,FBgn0039344,FBgn0051092,FBgn0027508,FBgn0039346,FBgn0039357,FBgn0011666,FBgn0039348,FBgn0039350,FBgn0039368,FBgn0039355,FBgn0261986,FBgn0039359,FBgn0039358,FBgn0261287,FBgn0039367,FBgn0039356,FBgn0039360,FBgn0066101,FBgn0039347,FBgn0039366,FBgn0039369
FBgn0266753	FBgn0042710,FBgn0263118,FBgn0085320,FBgn0039431,FBgn0039429,FBgn0040606,FBgn0023178,FBgn0262577,FBgn0042711,FBgn0039427,FBgn0263289,FBgn0039430,FBgn0039435,FBgn0039434,FBgn0039428
FBgn0266763	FBgn0010356,FBgn0033570,FBgn0033566,FBgn0033569,FBgn0033573,FBgn0263510,FBgn0040765,FBgn0050016,FBgn0033572,FBgn0033564,FBgn0050020,FBgn0033574,FBgn0033571,FBgn0061356,FBgn0050015,FBgn0017414
FBgn0266764	FBgn0034483,FBgn0034484,FBgn0265836,FBgn0034490,FBgn0034489,FBgn0034488,FBgn0004364,FBgn0265835,FBgn0034485,FBgn0034486,FBgn0034481,FBgn0034487
FBgn0266766	FBgn0034477,FBgn0034471,FBgn0043533,FBgn0046879,FBgn0034475,FBgn0034468,FBgn0046880,FBgn0040729,FBgn0034472,FBgn0265762,FBgn0043532,FBgn0034467,FBgn0034470,FBgn0034474,FBgn0034476,FBgn0034473
FBgn0266768	FBgn0262580,FBgn0003459,FBgn0036421,FBgn0036422,FBgn0036423,FBgn0087007,FBgn0036419,FBgn0001085
FBgn0266769	FBgn0036775,FBgn0002901,FBgn0036783,FBgn0036784,FBgn0036782,FBgn0036773,FBgn0262100,FBgn0003997,FBgn0036774,FBgn0036777,FBgn0036778,FBgn0020300,FBgn0036781,FBgn0036780,FBgn0052195
FBgn0266770	FBgn0037153,FBgn0037149,FBgn0000100,FBgn0004514,FBgn0037147,FBgn0263249,FBgn0004414,FBgn0027532,FBgn0037151,FBgn0259973,Novel000133,FBgn0037150
FBgn0266771	FBgn0037151,FBgn0027532,FBgn0037150,Novel000133,FBgn0259973,FBgn0263249,FBgn0004414,FBgn0037147,FBgn0004514,FBgn0037153,FBgn0037149,FBgn0000100
FBgn0266772	FBgn0263004,FBgn0037164,FBgn0052450,FBgn0037162,FBgn0037163,FBgn0004449,FBgn0037165,FBgn0037166,FBgn0263034,FBgn0037167,FBgn0263035,FBgn0263036
FBgn0266773	FBgn0002926,FBgn0024177,FBgn0042185,FBgn0035708,FBgn0041232,FBgn0263973,FBgn0020251,FBgn0035710,FBgn0004619,FBgn0261934,FBgn0035707,FBgn0035709,FBgn0005626,FBgn0035711
FBgn0266775	FBgn0259236,FBgn0036534,FBgn0052150,FBgn0036537,FBgn0036527,FBgn0015025,FBgn0260776,FBgn0036528,FBgn0041160,FBgn0036531,FBgn0010105,FBgn0014848,FBgn0004588,FBgn0036532,FBgn0261722,FBgn0004591,FBgn0014849,FBgn0260777,FBgn0262529,FBgn0004594,FBgn0036538,FBgn0004592,FBgn0040230,FBgn0262528,FBgn0264908,FBgn0014850,FBgn0004593,FBgn0085481,FBgn0004590,FBgn0036529,FBgn0262530,FBgn0004589,FBgn0014851,FBg…
FBgn0266776	FBgn0260960,FBgn0036656,FBgn0004108,FBgn0250814,FBgn0002284,FBgn0017572,FBgn0063485,FBgn0000017,FBgn0052163,FBgn0036641,FBgn0036655,FBgn0002283,FBgn0043577,FBgn0036648,FBgn0010223,FBgn0264605,FBgn0025558,FBgn0042178,FBgn0027500,FBgn0042177,FBgn0036643,FBgn0043578,FBgn0004465,FBgn0026061,FBgn0036654,FBgn0036652,FBgn0036659,FBgn0040512,FBgn0000414,FBgn0262732,FBgn0036640,FBgn0003741,FBgn0004556,FBg…
FBgn0266777	FBgn0036075,FBgn0036078,FBgn0000451,FBgn0052057,FBgn0036080,FBgn0052055,FBgn0052056,FBgn0011569
FBgn0266778	FBgn0037039,FBgn0264552,FBgn0037036,FBgn0003415,FBgn0040637,FBgn0037042,FBgn0037038,FBgn0053286,FBgn0037037,FBgn0037035,FBgn0037046,FBgn0028402,FBgn0037045,FBgn0011591,FBgn0052432,FBgn0053287,FBgn0037040,FBgn0259972,FBgn0037044,FBgn0026179
FBgn0266780	FBgn0036082,FBgn0052062,FBgn0052061,FBgn0052058,FBgn0036083,FBgn0011802,FBgn0045770
FBgn0266781	FBgn0036104,FBgn0036107,FBgn0036105,FBgn0036102,FBgn0036108,FBgn0262890,FBgn0036111,FBgn0036110,FBgn0026160,FBgn0036109,FBgn0262020,FBgn0036106,FBgn0027615
FBgn0266782	FBgn0036110,FBgn0036111,FBgn0262890,FBgn0027615,FBgn0262020,FBgn0036109,FBgn0036106,FBgn0026160,FBgn0036105,FBgn0036102,FBgn0036107,FBgn0036104,FBgn0036108
FBgn0266783	FBgn0026160,FBgn0013469,FBgn0036108,FBgn0052079,FBgn0036116,FBgn0036107,FBgn0036104,FBgn0036112,FBgn0052081,FBgn0027615,FBgn0036109,FBgn0036106,FBgn0036111,FBgn0036110,FBgn0263776,FBgn0036105,FBgn0036117,FBgn0029172
FBgn0266784	FBgn0263776,FBgn0036105,FBgn0029172,FBgn0036117,FBgn0036118,FBgn0036109,FBgn0036106,FBgn0052081,FBgn0027615,FBgn0036111,FBgn0036110,FBgn0052079,FBgn0036108,FBgn0036104,FBgn0036112,FBgn0052069,FBgn0036107,FBgn0036116,FBgn0013469,FBgn0026160
FBgn0266785	FBgn0265469,FBgn0036158,FBgn0041094,FBgn0036154,FBgn0036153,FBgn0036156,FBgn0036152,FBgn0036157,FBgn0036155
FBgn0266786	FBgn0036159,FBgn0036156,FBgn0036152,FBgn0036155,FBgn0036157,FBgn0036158,FBgn0041094,FBgn0265469,FBgn0036153,FBgn0036154
FBgn0266787	FBgn0010435,FBgn0060296,FBgn0035077,FBgn0050423,FBgn0035083,FBgn0001147,FBgn0035090,FBgn0004055,FBgn0035092,FBgn0265182,FBgn0035091,FBgn0050424,FBgn0035085,FBgn0035088,FBgn0001148,FBgn0035082,FBgn0035084,FBgn0022343,FBgn0085434,FBgn0035076,FBgn0004919,FBgn0085442,FBgn0265434,FBgn0035089,FBgn0035087,FBgn0035078,FBgn0027599,FBgn0043792,FBgn0002607,FBgn0066084,FBgn0035086
FBgn0266788	FBgn0040813,FBgn0259971,FBgn0001256,FBgn0036350,FBgn0036352,FBgn0023095,FBgn0003034,FBgn0036348,FBgn0036351,FBgn0036349,FBgn0002573,FBgn0259970,FBgn0052119,FBgn0262623,FBgn0036353,FBgn0036354,FBgn0040814
FBgn0266789	FBgn0040814,FBgn0036354,FBgn0036353,FBgn0036351,FBgn0023095,FBgn0036348,FBgn0003034,FBgn0036352,FBgn0036350,FBgn0259971,FBgn0040813,FBgn0001256,FBgn0259970,FBgn0052119,FBgn0262623,FBgn0002573,FBgn0036349
FBgn0266790	FBgn0036352,FBgn0023095,FBgn0003034,FBgn0036348,FBgn0259971,FBgn0001256,FBgn0040813,FBgn0036350,FBgn0036351,FBgn0036349,FBgn0002573,FBgn0052119,FBgn0262623,FBgn0259970,FBgn0036353,FBgn0040814,FBgn0036354
FBgn0266791	FBgn0043530,FBgn0040747,FBgn0033983,FBgn0029082,FBgn0033990,FBgn0015371,FBgn0262547,FBgn0261854,FBgn0033985,FBgn0027596,FBgn0033988,FBgn0033984,FBgn0033987,FBgn0053467,FBgn0033989
FBgn0266796	FBgn0053532,FBgn0051797,FBgn0032772,FBgn0032775,FBgn0032770,FBgn0032774,FBgn0041789,FBgn0032769,FBgn0024245,FBgn0032780,FBgn0032771,FBgn0053533,FBgn0051798,FBgn0032773,FBgn0016675,FBgn0032768,FBgn0032779
FBgn0266797	FBgn0031288,FBgn0020304,FBgn0031287,FBgn0051658,FBgn0031275,FBgn0031289,FBgn0002563,FBgn0086130,FBgn0020545,FBgn0011244,FBgn0015621,FBgn0026438,FBgn0040725,FBgn0031284,FBgn0053526,FBgn0010583,FBgn0002936,FBgn0000442,FBgn0000497,FBgn0041250,FBgn0031281,FBgn0031277,FBgn0031279,FBgn0031292,FBgn0029095,FBgn0020305,FBgn0031283,FBgn0031285,FBgn0031276,FBgn0031282,FBgn0031286
FBgn0266799	FBgn0028481,FBgn0015621,FBgn0020545,FBgn0086130,FBgn0002563,FBgn0031289,FBgn0031287,FBgn0051658,FBgn0020304,FBgn0031288,FBgn0031282,FBgn0031286,FBgn0031283,FBgn0020305,FBgn0031285,FBgn0029095,FBgn0031292,FBgn0031281,FBgn0010583,FBgn0002936,FBgn0053526,FBgn0031284,FBgn0046113
FBgn0266800	FBgn0032100,FBgn0052982,FBgn0041092,FBgn0032104,FBgn0010314,FBgn0032111,FBgn0267252,FBgn0032110,FBgn0032101,FBgn0040097,FBgn0026439,FBgn0032105,FBgn0032109,FBgn0263082
FBgn0266802	FBgn0033703,FBgn0033683,FBgn0033686,FBgn0033685,FBgn0033688,FBgn0263020,FBgn0033696,FBgn0085261,FBgn0027504,FBgn0000426,FBgn0033698,FBgn0033692,FBgn0033699,FBgn0262889,FBgn0033691,FBgn0020377,FBgn0000253,FBgn0033697,FBgn0033701,FBgn0033679,FBgn0027495,FBgn0033687,FBgn0033706,FBgn0033702,FBgn0023167,FBgn0033680,FBgn0014184,FBgn0040759,FBgn0025454,FBgn0033705,FBgn0033693,FBgn0086677,FBgn0263021,FBg…
FBgn0266803	FBgn0033498,FBgn0033497,FBgn0085250,FBgn0265512,FBgn0005619,FBgn0033491,FBgn0033507,FBgn0250822,FBgn0033508,FBgn0033501,FBgn0033499,FBgn0003660,FBgn0028426,FBgn0033494,FBgn0033504,FBgn0026403,FBgn0000448,FBgn0261698,FBgn0026388,FBgn0033490,FBgn0033500,FBgn0033502
FBgn0266804	FBgn0033767,FBgn0020930,FBgn0261625,FBgn0040755,FBgn0000181,FBgn0050488,FBgn0002069,Novel000065,FBgn0033777,FBgn0050486,FBgn0050052,FBgn0033774,FBgn0033770,FBgn0033778,FBgn0003326,FBgn0013305,FBgn0033775,FBgn0026619,FBgn0028963,FBgn0033766,FBgn0250842,FBgn0025692,FBgn0261545,FBgn0011227,FBgn0033773,FBgn0033769,FBgn0086904,Novel000066,FBgn0026741,FBgn0050053
FBgn0266805	FBgn0033240,FBgn0027548,FBgn0033241,FBgn0026722,FBgn0033261,FBgn0028561,FBgn0050372,FBgn0033246,FBgn0050381,FBgn0033264,FBgn0020279,FBgn0033248,FBgn0050380,FBgn0033257,FBgn0027788,FBgn0033258,FBgn0028563,FBgn0013308,FBgn0033238,FBgn0023171,FBgn0033233,FBgn0033244,FBgn0033259,FBgn0033260,FBgn0033234,FBgn0085460,FBgn0033247,FBgn0050378,FBgn0033265,FBgn0015509,FBgn0085459,FBgn0033252,FBgn0040778,FBg…
FBgn0266806	FBgn0034748,FBgn0034753,FBgn0034742,FBgn0034744,FBgn0034740,FBgn0034759,FBgn0034766,FBgn0259145,Novel000072,FBgn0034758,FBgn0034755,FBgn0263031,FBgn0034769,FBgn0262141,FBgn0050269,FBgn0020257,FBgn0028371,FBgn0034768,FBgn0260866,FBgn0050259,FBgn0050195,FBgn0261596,FBgn0034770,FBgn0034750,FBgn0050268,FBgn0034739,FBgn0034745,FBgn0034756,FBgn0040658,FBgn0034763,FBgn0005631,FBgn0026261,FBgn0034737,FBg…
FBgn0266807	FBgn0034756,FBgn0034745,FBgn0040658,FBgn0050268,FBgn0034739,FBgn0034763,FBgn0005631,Novel000072,FBgn0259145,FBgn0034758,FBgn0034755,FBgn0263031,FBgn0034776,FBgn0034753,FBgn0034748,FBgn0034742,FBgn0034744,FBgn0034740,FBgn0034766,FBgn0034759,FBgn0028371,FBgn0034768,FBgn0050259,FBgn0260866,FBgn0261596,FBgn0050195,FBgn0034770,FBgn0034750,FBgn0034769,FBgn0262141,FBgn0050269,FBgn0020257,FBgn0263030,FBg…
FBgn0266808	FBgn0028741,FBgn0261362,FBgn0034277,FBgn0050323,FBgn0028494,FBgn0011589,FBgn0034279,FBgn0028740,FBgn0034275,FBgn0034266,FBgn0034284,FBgn0250851,FBgn0034271,FBgn0015522,FBgn0259211,FBgn0028744,FBgn0034272,FBgn0028743,FBgn0026316,FBgn0034274,FBgn0034270,FBgn0034265,FBgn0034267,FBgn0034264,FBgn0022740,FBgn0085224,FBgn0041585,FBgn0034281,FBgn0034278,FBgn0050110,FBgn0026309,FBgn0034269,FBgn0034276,FBg…
FBgn0266809	FBgn0033708,FBgn0033727,FBgn0033702,FBgn0033706,FBgn0050046,FBgn0033717,FBgn0050049,FBgn0033721,FBgn0050048,FBgn0054021,FBgn0033715,FBgn0053012,FBgn0050047,FBgn0061197,FBgn0263021,FBgn0033712,FBgn0033705,FBgn0261611,FBgn0033699,FBgn0033724,FBgn0033713,FBgn0033698,FBgn0033716,FBgn0050203,FBgn0050042,FBgn0033703,FBgn0033725,FBgn0263020,FBgn0033701,FBgn0033710,FBgn0033723,FBgn0033726,FBgn0050045,FBg…
FBgn0266810	FBgn0083936,FBgn0050457,FBgn0034205,FBgn0086350,FBgn0050456,FBgn0034183,FBgn0010591,FBgn0262563,FBgn0262567,FBgn0034184,FBgn0034198,FBgn0034187,FBgn0034199,FBgn0034197,FBgn0026721,FBgn0034202,FBgn0265487,FBgn0034191,FBgn0034200,FBgn0034201,FBgn0034182,FBgn0263033,FBgn0034186,FBgn0023172,FBgn0034204,Novel000098,FBgn0034195,FBgn0050458,FBgn0262882,FBgn0034196,FBgn0263032,FBgn0050460,FBgn0263114,FBg…
FBgn0266811	FBgn0000078,FBgn0010226,FBgn0050460,FBgn0263032,FBgn0263114,FBgn0034194,FBgn0000079,FBgn0034186,FBgn0023172,FBgn0265487,FBgn0034201,FBgn0034182,FBgn0263033,FBgn0034200,FBgn0034191,FBgn0034195,FBgn0034204,FBgn0034196,FBgn0262882,FBgn0050458,FBgn0034197,FBgn0034199,FBgn0026721,FBgn0034202,FBgn0034205,FBgn0086350,FBgn0050457,FBgn0010591,FBgn0034183,FBgn0262563,FBgn0262567,FBgn0050456,FBgn0083936,FBg…
FBgn0266812	FBgn0050103,FBgn0050109,FBgn0085222,FBgn0261501,FBgn0029079,FBgn0034245,FBgn0050104,FBgn0028382,FBgn0034255,FBgn0034259,FBgn0263113,FBgn0029006,FBgn0250868,FBgn0050106,FBgn0034247,FBgn0034240,FBgn0004400,FBgn0034248,FBgn0263197,FBgn0050105,FBgn0034232,FBgn0265576,FBgn0034261,FBgn0034258,FBgn0263076,FBgn0034230,FBgn0034249,FBgn0263029,FBgn0010409,FBgn0264541,FBgn0050108,FBgn0034253,FBgn0085223,FBg…
FBgn0266813	FBgn0040294,FBgn0262720,FBgn0034237,FBgn0034242,FBgn0034246,FBgn0016701,FBgn0034251,FBgn0034243,FBgn0016059,FBgn0034231,FBgn0034249,FBgn0263029,FBgn0010409,FBgn0264541,FBgn0050108,FBgn0034253,FBgn0085223,FBgn0034229,FBgn0034247,FBgn0004400,FBgn0034240,FBgn0260764,FBgn0034248,FBgn0263197,FBgn0050105,FBgn0034232,FBgn0265576,FBgn0260763,FBgn0034261,FBgn0263076,FBgn0034258,FBgn0034230,FBgn0050103,FBg…
FBgn0266814	FBgn0033701,FBgn0033710,FBgn0033697,FBgn0033691,FBgn0000253,FBgn0020377,FBgn0262889,FBgn0033692,FBgn0261611,FBgn0033699,FBgn0000426,FBgn0033698,FBgn0085261,FBgn0027504,FBgn0033683,FBgn0033686,FBgn0033703,FBgn0033688,FBgn0263020,FBgn0033696,FBgn0033685,FBgn0033690,FBgn0026176,FBgn0053964,FBgn0010621,FBgn0061197,FBgn0263021,FBgn0086677,FBgn0040759,FBgn0033693,FBgn0033705,FBgn0025454,FBgn0033708,FBg…
FBgn0266815	FBgn0050075,FBgn0033926,FBgn0050073,FBgn0033933,FBgn0050074,FBgn0261823,FBgn0085473,FBgn0050197,FBgn0033934,FBgn0085408,FBgn0050072,FBgn0085471,FBgn0265974,FBgn0085213,FBgn0050067,FBgn0033942,FBgn0033936,FBgn0033929,FBgn0085472,FBgn0085214,FBgn0267824,FBgn0033925,FBgn0013725,FBgn0033924,FBgn0024698,FBgn0033932,FBgn0033931,FBgn0033928,FBgn0261613,FBgn0033935
FBgn0266816	FBgn0259219,FBgn0085264,FBgn0033826,FBgn0033821,FBgn0053137,FBgn0033813,FBgn0085341,FBgn0033816,FBgn0033818,FBgn0053182,FBgn0033827,FBgn0263998,FBgn0085344,FBgn0002789,FBgn0033810,FBgn0027079,FBgn0033798,FBgn0050058,Novel000093,FBgn0033820,FBgn0033812,FBgn0020370,FBgn0033817,FBgn0033806,FBgn0005654,Novel000092,FBgn0033815,FBgn0011763,FBgn0033799,FBgn0053138,FBgn0028991,FBgn0033809,FBgn0033808,FBg…
FBgn0266817	FBgn0033769,FBgn0053792,FBgn0050053,FBgn0033763,FBgn0033761,Novel000062,FBgn0045063,FBgn0028683,FBgn0003527,FBgn0033760,FBgn0053632,FBgn0033751,Novel000064,FBgn0033753,FBgn0053752,FBgn0011592,FBgn0061359,FBgn0033749,FBgn0033767,FBgn0261673,FBgn0053775,FBgn0033757,FBgn0011604,FBgn0033756,FBgn0050056,FBgn0033754,FBgn0266487,FBgn0033750,FBgn0050054,FBgn0050044,FBgn0004435,FBgn0033766,FBgn0033748,FBg…
FBgn0266818	FBgn0003174,FBgn0050385,FBgn0044011,FBgn0053140,FBgn0260991,FBgn0033155,FBgn0033153,FBgn0033158,FBgn0033159,FBgn0002930,FBgn0033154,FBgn0033149,FBgn0026602,FBgn0050384,FBgn0003090,FBgn0026389
FBgn0266819	FBgn0261016,FBgn0259234,FBgn0050340,FBgn0050338,FBgn0033438,FBgn0259246,FBgn0033426,FBgn0050339,FBgn0010342,FBgn0033423,FBgn0033421,FBgn0033422,FBgn0033427,Novel000058,FBgn0050000,FBgn0033431,FBgn0033434,FBgn0050005,FBgn0004360,FBgn0025286,FBgn0033428,FBgn0033429,FBgn0033437,FBgn0085436
FBgn0266820	FBgn0032424,FBgn0264361,FBgn0041195,FBgn0051862,FBgn0262475,FBgn0000114,FBgn0043841
FBgn0266821	FBgn0032424,FBgn0264361,FBgn0041195,FBgn0051862,FBgn0000114,FBgn0262475,FBgn0043841
FBgn0266822	FBgn0028906,FBgn0028872,FBgn0028526,FBgn0028519,FBgn0259896,FBgn0001967,FBgn0028542,FBgn0051769,FBgn0032536,FBgn0028875,FBgn0028940,FBgn0003255,FBgn0261582,FBgn0028939,FBgn0028430,FBgn0027929,FBgn0260011,FBgn0028936,FBgn0028544,FBgn0027348,FBgn0028904,FBgn0054003,FBgn0261514,FBgn0032538,FBgn0028543
FBgn0266823	FBgn0032624,FBgn0265579,FBgn0085342,FBgn0032625,Novel000020,FBgn0026150,FBgn0032620,FBgn0053179,FBgn0052832,FBgn0261671,FBgn0051806,FBgn0040985,Novel000019,FBgn0260758,FBgn0051805,FBgn0032618
FBgn0266824	FBgn0031422,FBgn0000490,FBgn0031428,FBgn0264081,FBgn0051948,FBgn0031430,FBgn0031426,FBgn0031419,FBgn0085476,FBgn0011818,FBgn0085477,FBgn0031431,FBgn0264988,FBgn0031420,FBgn0031424,FBgn0264672,FBgn0031418,FBgn0031423,FBgn0264978,FBgn0041337,FBgn0031432
FBgn0266825	FBgn0261963,FBgn0031722,Novel000031,FBgn0031711,FBgn0000318,FBgn0031721,FBgn0031716,FBgn0020429,FBgn0031720,FBgn0031710,FBgn0002525,FBgn0031717,FBgn0031708,FBgn0031719,FBgn0031707,FBgn0051915,FBgn0014189,FBgn0031718,FBgn0051989,FBgn0016660,FBgn0031715,FBgn0031713,FBgn0051648,FBgn0031723,Novel000030,FBgn0004620
FBgn0266826	FBgn0085410,FBgn0086266,FBgn0031760,FBgn0031763,FBgn0001941,FBgn0031762,FBgn0003979,FBgn0261055,FBgn0086265,FBgn0001128,FBgn0031758,FBgn0000308,FBgn0031759,FBgn0259959,FBgn0040949,FBgn0043362,FBgn0001942,FBgn0001089,FBgn0031757,FBgn0015381,FBgn0262814,FBgn0031764,FBgn0002856,FBgn0002855,FBgn0051643,FBgn0025742,FBgn0265785,FBgn0031756,FBgn0031745,FBgn0031765,FBgn0031766,FBgn0003980,FBgn0031749,FBg…
FBgn0266827	FBgn0261055,FBgn0000052,FBgn0003979,FBgn0031758,FBgn0001128,FBgn0086265,FBgn0001941,FBgn0031762,FBgn0031760,FBgn0086266,FBgn0031763,FBgn0085410,FBgn0031757,FBgn0015381,FBgn0001942,FBgn0001089,FBgn0043362,FBgn0040949,FBgn0259959,FBgn0031759,FBgn0000308,FBgn0003980,FBgn0031745,FBgn0031756,FBgn0031765,FBgn0031766,FBgn0051643,FBgn0002855,FBgn0025742,FBgn0265785,FBgn0262814,FBgn0031764,FBgn0002856,FBg…
FBgn0266828	FBgn0031392,FBgn0031403,FBgn0261523,FBgn0010288,FBgn0031389,FBgn0031390,FBgn0031391,FBgn0031410,FBgn0031397,FBgn0051679,FBgn0040715,FBgn0031398,FBgn0051668,FBgn0267378,FBgn0259717,FBgn0031395,FBgn0000097,FBgn0042187,FBgn0054049,FBgn0031399,FBgn0031409,FBgn0052463,FBgn0051682,FBgn0027509,FBgn0262126,FBgn0031393,FBgn0042186,FBgn0085203,FBgn0053124,FBgn0053516,FBgn0051681,FBgn0031406,FBgn0011832,FBg…
FBgn0266829	FBgn0260451,FBgn0261608,FBgn0031659,FBgn0031675,FBgn0260470,FBgn0000299,FBgn0031677,FBgn0264742,FBgn0031681,FBgn0031664,FBgn0031663,FBgn0028694,FBgn0031668,FBgn0031678,FBgn0031670,FBgn0031676,FBgn0083960,FBgn0016075,FBgn0261836,FBgn0031682,FBgn0031661,FBgn0262467,FBgn0083962,FBgn0264743,FBgn0015834,FBgn0028572,FBgn0053113,FBgn0265968,FBgn0031662,FBgn0010607,FBgn0031684,FBgn0083961,FBgn0031657,FBg…
FBgn0266830	FBgn0032732,FBgn0000075,FBgn0002021,FBgn0032744,FBgn0002022,FBgn0032754,FBgn0046302,FBgn0032727,FBgn0032725,FBgn0032750,FBgn0032748,FBgn0001202,FBgn0032728,FBgn0086710,FBgn0032730,FBgn0032755,FBgn0032751,FBgn0032726,FBgn0086442,FBgn0028569,FBgn0263982,FBgn0032733,FBgn0032740,FBgn0032746,FBgn0263198,FBgn0032731,FBgn0032752,FBgn0051800,FBgn0032753,FBgn0032723,FBgn0002023,FBgn0032741,FBgn0051793,FBg…
FBgn0266831	FBgn0001983,FBgn0028370,FBgn0028892,FBgn0266163,FBgn0028880,FBgn0003448,FBgn0002524,FBgn0259922,FBgn0020371
FBgn0266832	FBgn0003941,FBgn0010473,FBgn0040102,FBgn0026394,FBgn0020762,FBgn0031592,FBgn0028482,FBgn0031589,FBgn0265269,FBgn0031590,FBgn0051961,FBgn0031596,FBgn0001075
FBgn0266833	FBgn0031589,FBgn0031592,FBgn0028482,FBgn0026394,FBgn0020762,FBgn0040102,FBgn0010473,FBgn0003941,FBgn0001075,FBgn0031596,FBgn0051961,FBgn0031590,FBgn0265269
FBgn0266834	FBgn0040102,FBgn0010473,FBgn0003941,FBgn0028482,FBgn0031592,FBgn0031589,FBgn0020762,FBgn0026394,FBgn0051961,FBgn0265269,FBgn0031590,FBgn0001075,FBgn0031596
FBgn0266835	FBgn0031635,FBgn0031627,FBgn0031638,FBgn0031636,FBgn0031637,FBgn0031630,FBgn0031634,FBgn0051660,FBgn0031629,FBgn0031645,FBgn0031632,FBgn0260428,FBgn0031646,FBgn0031639,FBgn0000286,FBgn0031643,FBgn0031631,FBgn0031628,FBgn0031644,FBgn0031626,FBgn0085380,FBgn0041150,FBgn0031633,FBgn0031640
FBgn0266836	FBgn0053516,FBgn0026396,FBgn0001125,FBgn0031388,FBgn0031391,FBgn0031390,FBgn0031377,FBgn0040717,FBgn0031378,FBgn0053673,FBgn0031379,FBgn0031381,FBgn0028952,FBgn0003557,FBgn0031389,FBgn0031384,FBgn0040719,FBgn0267972,FBgn0004507,FBgn0259192,FBgn0259230,FBgn0043539,FBgn0031375,FBgn0053543,FBgn0040718
FBgn0266837	FBgn0031538,FBgn0266670,FBgn0031545,FBgn0031536,FBgn0051776,FBgn0004892,FBgn0053123,FBgn0051954,FBgn0031533,FBgn0031548,FBgn0031547,FBgn0002985,FBgn0005616,FBgn0261560,FBgn0031534,FBgn0024244,FBgn0051956,FBgn0031540,FBgn0051952,FBgn0031550,FBgn0014396,FBgn0031530,FBgn0031549,FBgn0031544,FBgn0031531,FBgn0031535,FBgn0264363,FBgn0031542,FBgn0031546,FBgn0021967
FBgn0266839	FBgn0031515,FBgn0031533,FBgn0085204,FBgn0016698,FBgn0031526,FBgn0031517,FBgn0031540,FBgn0261560,FBgn0031516,FBgn0051952,FBgn0021967,FBgn0031518,FBgn0020445,FBgn0053281,FBgn0031535,FBgn0031538,FBgn0266670,FBgn0031519,FBgn0031536,FBgn0259949,FBgn0051776,FBgn0085423,FBgn0031528,FBgn0031529,FBgn0031520,FBgn0031522,FBgn0051956,FBgn0031534,FBgn0005616,FBgn0259950,FBgn0031542,FBgn0053282,FBgn0031531,FBg…
FBgn0266840	FBgn0053309,FBgn0028866,FBgn0032554,FBgn0261568,FBgn0013300,FBgn0259213,FBgn0028887,FBgn0250834,FBgn0086711,FBgn0032553,FBgn0028886,FBgn0013301
FBgn0266841	FBgn0005771,FBgn0028871,FBgn0053648,FBgn0250844,FBgn0028913,FBgn0261566,FBgn0264810,FBgn0028844,FBgn0004858
FBgn0266842	FBgn0031904,FBgn0031908,FBgn0031910,FBgn0010453,FBgn0259111,FBgn0004009,FBgn0264344,FBgn0031907,FBgn0028387,FBgn0031906,FBgn0031905,Novel000015,FBgn0002938,FBgn0031909,FBgn0031903,FBgn0031912,FBgn0031902,FBgn0051909,FBgn0031900
FBgn0266844	FBgn0032876,FBgn0014859,FBgn0053322,FBgn0032879,FBgn0032884,FBgn0011202,FBgn0250785,FBgn0016054,FBgn0032882,FBgn0042133,FBgn0067311,FBgn0032868,FBgn0032886,FBgn0032871,FBgn0051678,FBgn0261058,FBgn0032880,FBgn0032878,FBgn0032888,FBgn0086657,FBgn0032881,FBgn0032877,FBgn0067312,FBgn0032869,FBgn0032870,FBgn0000251,FBgn0032873,FBgn0032883,FBgn0261787,FBgn0051680,FBgn0262743
FBgn0266846	FBgn0259226,FBgn0033316,FBgn0050361,FBgn0033307,FBgn0267792,FBgn0033301,FBgn0033317,FBgn0033297,FBgn0033302,FBgn0033309,FBgn0033308,FBgn0003892,FBgn0033313,FBgn0033296,FBgn0050359,FBgn0033294,FBgn0050360,FBgn0033312,FBgn0033304,FBgn0262812,FBgn0033315,FBgn0022027
FBgn0266847	FBgn0033395,FBgn0026326,FBgn0259728,FBgn0266486,FBgn0083977,FBgn0050342,FBgn0033380,FBgn0033405,FBgn0027561,FBgn0050345,FBgn0033389,FBgn0028408,FBgn0015561,FBgn0033388,FBgn0028955,FBgn0050343,FBgn0015477,FBgn0033382,FBgn0033392,FBgn0086656,FBgn0033400,FBgn0260972,FBgn0033402,FBgn0003612,FBgn0015037,FBgn0002567,FBgn0033403,FBgn0265313,FBgn0033379,FBgn0262515,FBgn0033401,FBgn0050344,FBgn0010114,FBg…
FBgn0266849	FBgn0010575,FBgn0000658,FBgn0034326,FBgn0034327,FBgn0034304,FBgn0053198,FBgn0027836,FBgn0028983,FBgn0034317,FBgn0260401,FBgn0266420,FBgn0050114,FBgn0260392,FBgn0034307,FBgn0265297,FBgn0034314,FBgn0040737,FBgn0053958,FBgn0034315,FBgn0034313,FBgn0034308,FBgn0034312,FBgn0034324,FBgn0062440,FBgn0034318,FBgn0034325,FBgn0022238,FBgn0034310,FBgn0001222,FBgn0034322,FBgn0034321,FBgn0003044,FBgn0000057,FBg…
FBgn0266850	FBgn0034324,FBgn0034318,FBgn0062440,FBgn0022238,FBgn0034325,FBgn0034310,FBgn0001222,FBgn0034308,FBgn0034312,FBgn0000057,FBgn0040465,FBgn0034323,FBgn0034322,FBgn0034321,FBgn0003044,FBgn0027836,FBgn0028983,FBgn0034317,FBgn0260401,FBgn0266420,FBgn0010575,FBgn0000658,FBgn0034304,FBgn0034327,FBgn0034326,FBgn0053198,FBgn0053958,FBgn0034315,FBgn0034313,FBgn0050114,FBgn0260392,FBgn0034307,FBgn0265297,FBg…
FBgn0266851	FBgn0053470,FBgn0033830,FBgn0265272,FBgn0259219,Novel000092,FBgn0263774,FBgn0019928,FBgn0050065,FBgn0033826,FBgn0259221,FBgn0041579,FBgn0013765,FBgn0260475,FBgn0033835,FBgn0033827,FBgn0033834,FBgn0086757,FBgn0000119,FBgn0033836,Novel000093,FBgn0033828,FBgn0050062,FBgn0052843
FBgn0266852	FBgn0085225,FBgn0034300,FBgn0040465,FBgn0034299,FBgn0000057,FBgn0034301,FBgn0034293,FBgn0003044,FBgn0034289,FBgn0003140,FBgn0054005,FBgn0034288,FBgn0265297,FBgn0034295,FBgn0034294,FBgn0022238,FBgn0028983,FBgn0034291,FBgn0003520,FBgn0001222,FBgn0085415,FBgn0062440,FBgn0034290,FBgn0034304,FBgn0034292,FBgn0034296,FBgn0034286
FBgn0266853	FBgn0085415,FBgn0062440,FBgn0034294,FBgn0022238,FBgn0028983,FBgn0034291,FBgn0003520,FBgn0001222,FBgn0034292,FBgn0034296,FBgn0034286,FBgn0034290,FBgn0034304,FBgn0040465,FBgn0034300,FBgn0034299,FBgn0000057,FBgn0085225,FBgn0265297,FBgn0034307,FBgn0034295,FBgn0034301,FBgn0034293,FBgn0003044,FBgn0034289,FBgn0054005,FBgn0034288
FBgn0266854	FBgn0003044,FBgn0034314,FBgn0034301,FBgn0034307,FBgn0265297,FBgn0260392,FBgn0050114,FBgn0085225,FBgn0034313,FBgn0034300,FBgn0040465,FBgn0034299,FBgn0000057,FBgn0034315,FBgn0053958,FBgn0034312,FBgn0034304,FBgn0000658,FBgn0034308,FBgn0260401,FBgn0034310,FBgn0001222,FBgn0003520,FBgn0034317,FBgn0028983,FBgn0027836,FBgn0022238,FBgn0062440,FBgn0034318,FBgn0085415
FBgn0266855	FBgn0262511,FBgn0050096,FBgn0034120,FBgn0029154,FBgn0261293,FBgn0034118,FBgn0034113,FBgn0034105,FBgn0262560,FBgn0050100,FBgn0034110,FBgn0034103,FBgn0034109,FBgn0085428,FBgn0034106,FBgn0050099,FBgn0029153,FBgn0028424,FBgn0034129,FBgn0034122,FBgn0034114,FBgn0264273,FBgn0034117,FBgn0034104,FBgn0261292,FBgn0050098,FBgn0034127,FBgn0050324,FBgn0034126,FBgn0262816,FBgn0010611,FBgn0259718,FBgn0034121,FBg…
FBgn0266856	FBgn0034105,FBgn0034113,FBgn0029154,FBgn0261293,FBgn0034118,FBgn0262511,FBgn0050096,FBgn0034120,FBgn0034106,FBgn0050099,FBgn0085428,FBgn0034103,FBgn0034109,FBgn0262560,FBgn0050100,FBgn0034110,FBgn0034117,FBgn0034104,FBgn0261292,FBgn0034129,FBgn0034122,FBgn0034114,FBgn0264273,FBgn0028424,FBgn0029153,FBgn0034128,FBgn0010611,FBgn0259718,FBgn0034121,FBgn0050324,FBgn0034127,FBgn0034126,FBgn0262816,FBg…
FBgn0266857	FBgn0260012,FBgn0050036,FBgn0050037,FBgn0262820,FBgn0033665,FBgn0000556,FBgn0033668,FBgn0033669,FBgn0010339,FBgn0085260,FBgn0011704,FBgn0033673,FBgn0033667,FBgn0028407,FBgn0265373,FBgn0026573,FBgn0260959,FBgn0086677,FBgn0033672,FBgn0053145,FBgn0004839,FBgn0033680,FBgn0259985,FBgn0033679,FBgn0267728,FBgn0004463,FBgn0024732,FBgn0050039,FBgn0033677
FBgn0266858	FBgn0010339,FBgn0033669,FBgn0085260,FBgn0033668,FBgn0000556,FBgn0033665,FBgn0262820,FBgn0050037,FBgn0050036,FBgn0260012,FBgn0086677,FBgn0033672,FBgn0260959,FBgn0028407,FBgn0026573,FBgn0265373,FBgn0033667,FBgn0033673,FBgn0011704,FBgn0259985,FBgn0033680,FBgn0004839,FBgn0053145,FBgn0033677,FBgn0050039,FBgn0024732,FBgn0004463,FBgn0033679,FBgn0267728
FBgn0266859	FBgn0025885,FBgn0033170,FBgn0033192,FBgn0264294,FBgn0033164,FBgn0033166,FBgn0033177,FBgn0259745,FBgn0033187,FBgn0050502,FBgn0033184,FBgn0050503,FBgn0262948,FBgn0033169,FBgn0041243,FBgn0000352,FBgn0033174,FBgn0033190,FBgn0025185,FBgn0033183,FBgn0022772,FBgn0040513,FBgn0033159,FBgn0010548,FBgn0033179,FBgn0033160,FBgn0033165,FBgn0033162,FBgn0003460,FBgn0033186,FBgn0033191,FBgn0263240,FBgn0033188,FBg…
FBgn0266860	FBgn0017558,FBgn0016078,FBgn0040775,FBgn0033413,FBgn0004360,FBgn0028473,FBgn0053757,FBgn0029092,FBgn0033412,FBgn0033405,FBgn0033408,FBgn0041087,FBgn0053774,FBgn0010549,FBgn0259234,FBgn0033403,FBgn0259246,FBgn0033421,FBgn0016970,FBgn0033404,FBgn0053758
FBgn0266861	FBgn0028424,FBgn0001308,FBgn0029153,FBgn0025519,FBgn0034104,FBgn0034117,FBgn0034114,FBgn0034122,FBgn0264273,FBgn0015925,FBgn0034129,FBgn0262816,FBgn0050324,FBgn0034127,FBgn0034126,FBgn0024249,FBgn0050098,FBgn0034128,FBgn0034121,FBgn0010611,FBgn0259718,FBgn0262511,FBgn0050096,FBgn0034120,FBgn0034113,FBgn0034105,FBgn0053017,FBgn0034118,FBgn0029154,FBgn0034103,FBgn0034109,FBgn0034110,FBgn0262560,FBg…
FBgn0266862	FBgn0034198,FBgn0034206,FBgn0050458,FBgn0262882,FBgn0034196,FBgn0034204,FBgn0046294,FBgn0034195,FBgn0050456,FBgn0010591,FBgn0262567,FBgn0262563,FBgn0050457,FBgn0034205,FBgn0034200,FBgn0034191,FBgn0262568,FBgn0034201,FBgn0083936,FBgn0265487,FBgn0262961,FBgn0034202,FBgn0000079,FBgn0034194,FBgn0034197,FBgn0010226,FBgn0000078,FBgn0034199
FBgn0266863	FBgn0033465,FBgn0028560,FBgn0050008,FBgn0033461,FBgn0085249,FBgn0033463,FBgn0033468,FBgn0033480,FBgn0013435,FBgn0263260,FBgn0033476,FBgn0033473,FBgn0000715,FBgn0033483,FBgn0050007,FBgn0033484,FBgn0010385,FBgn0033467,FBgn0033469,FBgn0027619,FBgn0033474,FBgn0033466,FBgn0033464,FBgn0265342,FBgn0011656,FBgn0033482,FBgn0033479,FBgn0033475,FBgn0040773,FBgn0262169,FBgn0033481,FBgn0022382,FBgn0033471,FBg…
FBgn0266864	FBgn0034894,FBgn0034907,FBgn0034908,FBgn0034909,FBgn0083941,FBgn0262728,FBgn0034902,FBgn0034903,FBgn0034897,FBgn0011297,FBgn0034893,FBgn0034911,FBgn0265052,FBgn0028411,FBgn0000562,FBgn0034887,FBgn0011296,FBgn0034900,FBgn0050177,FBgn0016762,FBgn0266377,FBgn0034906,FBgn0050183,FBgn0004795,FBgn0034901,FBgn0034898,FBgn0034904,FBgn0013548,FBgn0034899,FBgn0002174,FBgn0010278
FBgn0266866	FBgn0266433,FBgn0053200,FBgn0017482,FBgn0034724,FBgn0022984,FBgn0022985,FBgn0266432,FBgn0034728,FBgn0022986,FBgn0034726,FBgn0034723,FBgn0034721,FBgn0025878,FBgn0034730,FBgn0034727,FBgn0034725,FBgn0034733,FBgn0020307,FBgn0034722,FBgn0034718,FBgn0034717,FBgn0085237,FBgn0034729,FBgn0013272,FBgn0085236,FBgn0034720,FBgn0034731,FBgn0016053
FBgn0266867	FBgn0034750,FBgn0261596,FBgn0260866,FBgn0050195,FBgn0020257,FBgn0050269,FBgn0262141,FBgn0263031,FBgn0034755,Novel000072,FBgn0034758,FBgn0034759,FBgn0034740,FBgn0034744,FBgn0034742,FBgn0034753,FBgn0034748,FBgn0005631,FBgn0034763,FBgn0040658,FBgn0034756,FBgn0034745,FBgn0034739,FBgn0050273,FBgn0085475,FBgn0260767,FBgn0085474,FBgn0034761,FBgn0034737,FBgn0026261,FBgn0019949,FBgn0040091,FBgn0034741,FBg…
FBgn0266868	FBgn0016684,FBgn0050476,FBgn0033971,FBgn0033969,FBgn0013771,FBgn0033972,FBgn0010388,FBgn0033958,FBgn0033960,FBgn0264962,FBgn0053505,FBgn0012042,FBgn0027783,FBgn0033970,FBgn0266723,FBgn0053506,FBgn0013773,FBgn0033961,FBgn0028434,FBgn0013772,FBgn0001319,FBgn0033979,FBgn0027596,FBgn0028689,FBgn0033963,FBgn0033978,FBgn0015602,Novel000094,FBgn0033982,FBgn0033980,FBgn0033981,FBgn0041581,FBgn0033968,FBg…
FBgn0266869	FBgn0051848,FBgn0032474,FBgn0032484,FBgn0032479,FBgn0027586,FBgn0040972,FBgn0024291,FBgn0264546,FBgn0051730,FBgn0032487,FBgn0040973,FBgn0032493,FBgn0032494,FBgn0032490,FBgn0028410,FBgn0032477,FBgn0032499,FBgn0051729,FBgn0051728,FBgn0028406,FBgn0032476,FBgn0264894,FBgn0032480,FBgn0264308,FBgn0032485,FBgn0032478,FBgn0032475,FBgn0032489,FBgn0032481,FBgn0032472,FBgn0032495,FBgn0051849,FBgn0264301,FBg…
FBgn0266870	FBgn0013301,FBgn0000317,FBgn0028879,FBgn0261881,FBgn0261882,FBgn0001977,FBgn0010422,FBgn0041713,FBgn0259213,FBgn0053679,FBgn0001974,FBgn0053310,FBgn0051832,FBgn0028926,FBgn0086711,FBgn0004837,FBgn0024183,FBgn0032554,FBgn0040228,FBgn0028887,FBgn0262526,FBgn0013300,FBgn0260446
FBgn0266871	FBgn0032658,FBgn0051742,FBgn0032656,FBgn0262018,FBgn0262960,FBgn0023096,FBgn0262017
FBgn0266872	FBgn0023096,FBgn0262960,FBgn0262018,FBgn0051742,FBgn0032656,FBgn0032658,FBgn0262017
FBgn0266873	FBgn0051600,FBgn0003866,FBgn0032966,FBgn0032968,FBgn0051693,FBgn0032965,FBgn0032969,FBgn0028979,FBgn0032967
FBgn0266874	FBgn0051693,FBgn0261802,FBgn0032972,FBgn0032969,FBgn0028979,FBgn0084001,FBgn0051702,FBgn0051601,FBgn0032971,FBgn0051703,FBgn0032973,FBgn0032974,FBgn0260996,FBgn0040519,FBgn0085202,FBgn0025674
FBgn0266875	FBgn0031505,FBgn0011648,FBgn0005779,FBgn0031512,FBgn0260817,FBgn0014906,FBgn0264744,FBgn0031515,FBgn0031514,FBgn0031518,FBgn0051698,FBgn0031504,FBgn0015600,FBgn0031516,FBgn0085422,FBgn0031513,FBgn0031517
FBgn0266876	FBgn0031518,FBgn0020445,FBgn0053282,FBgn0031523,FBgn0053281,FBgn0051698,FBgn0031516,FBgn0085422,FBgn0031522,FBgn0031526,FBgn0031517,FBgn0031513,FBgn0031520,FBgn0085423,FBgn0031512,FBgn0260817,FBgn0014906,FBgn0031515,FBgn0264744,FBgn0031514,FBgn0031519
[truncated: 2,271 more rows]
