# Supplementary material for: LncRNA mediated regulation of aging pathways in Drosophila melanogaster during dietary restriction
Source: publisher site journal article supplement (doi:10.18632/aging.101062), 2016-09-27
Supplement: Supplementary file 8 [file aging-v8i9-101062-supplementary-material-SD3.xls]

## Sheet: novel_lncRNA
Chromosome	Software	Type of transcripts	Start of chromosome	End of chromosome	Strand	LncRNA ID
211000022278174	Cufflinks	exon	617	1151	+	gene_id "XLOC_000043"; transcript_id "TCONS_00000097"; exon_number "1"; gene_type "lincRNA";
211000022278174	Cufflinks	exon	617	1145	-	gene_id "XLOC_000044"; transcript_id "TCONS_00000098"; exon_number "1"; gene_type "lincRNA";
211000022278224	Cufflinks	exon	13	1507	+	gene_id "XLOC_000071"; transcript_id "TCONS_00000138"; exon_number "1"; gene_type "lincRNA";
211000022278227	Cufflinks	exon	6	1350	+	gene_id "XLOC_000080"; transcript_id "TCONS_00000149"; exon_number "1"; gene_type "lincRNA";
211000022278227	Cufflinks	exon	1	1350	-	gene_id "XLOC_000081"; transcript_id "TCONS_00000150"; exon_number "1"; gene_type "lincRNA";
211000022278231	Cufflinks	exon	48	259	-	gene_id "XLOC_000084"; transcript_id "TCONS_00000155"; exon_number "1"; gene_type "lincRNA";
211000022278312	Cufflinks	exon	633	1010	-	gene_id "XLOC_000138"; transcript_id "TCONS_00000233"; exon_number "1"; gene_type "lincRNA";
211000022278312	Cufflinks	exon	1120	1244	-	gene_id "XLOC_000138"; transcript_id "TCONS_00000233"; exon_number "2"; gene_type "lincRNA";
211000022278312	Cufflinks	exon	681	873	-	gene_id "XLOC_000138"; transcript_id "TCONS_00000234"; exon_number "1"; gene_type "lincRNA";
211000022278312	Cufflinks	exon	931	1010	-	gene_id "XLOC_000138"; transcript_id "TCONS_00000234"; exon_number "2"; gene_type "lincRNA";
211000022278312	Cufflinks	exon	1120	1258	-	gene_id "XLOC_000138"; transcript_id "TCONS_00000234"; exon_number "3"; gene_type "lincRNA";
211000022278327	Cufflinks	exon	22	256	+	gene_id "XLOC_000176"; transcript_id "TCONS_00000318"; exon_number "1"; gene_type "lincRNA";
211000022278411	Cufflinks	exon	1403	1611	+	gene_id "XLOC_000218"; transcript_id "TCONS_00000404"; exon_number "1"; gene_type "lincRNA";
211000022278413	Cufflinks	exon	1031	1235	-	gene_id "XLOC_000223"; transcript_id "TCONS_00000408"; exon_number "1"; gene_type "lincRNA";
211000022278421	Cufflinks	exon	1	2697	-	gene_id "XLOC_000236"; transcript_id "TCONS_00000426"; exon_number "1"; gene_type "lincRNA";
211000022278435	Cufflinks	exon	3	1886	+	gene_id "XLOC_000241"; transcript_id "TCONS_00000443"; exon_number "1"; gene_type "lincRNA";
211000022278451	Cufflinks	exon	4	1527	-	gene_id "XLOC_000246"; transcript_id "TCONS_00000460"; exon_number "1"; gene_type "lincRNA";
211000022278465	Cufflinks	exon	2	1723	-	gene_id "XLOC_000275"; transcript_id "TCONS_00000520"; exon_number "1"; gene_type "lincRNA";
211000022278470	Cufflinks	exon	457	669	-	gene_id "XLOC_000286"; transcript_id "TCONS_00000560"; exon_number "1"; gene_type "lincRNA";
211000022278477	Cufflinks	exon	825	1030	-	gene_id "XLOC_000300"; transcript_id "TCONS_00000590"; exon_number "1"; gene_type "lincRNA";
211000022278487	Cufflinks	exon	78	284	+	gene_id "XLOC_000326"; transcript_id "TCONS_00000636"; exon_number "1"; gene_type "lincRNA";
211000022278487	Cufflinks	exon	65	302	-	gene_id "XLOC_000328"; transcript_id "TCONS_00000637"; exon_number "1"; gene_type "lincRNA";
211000022278634	Cufflinks	exon	34	1729	-	gene_id "XLOC_000504"; transcript_id "TCONS_00000996"; exon_number "1"; gene_type "lincRNA";
211000022278640	Cufflinks	exon	995	1233	-	gene_id "XLOC_000512"; transcript_id "TCONS_00001011"; exon_number "1"; gene_type "lincRNA";
211000022278652	Cufflinks	exon	137	447	-	gene_id "XLOC_000534"; transcript_id "TCONS_00001045"; exon_number "1"; gene_type "lincRNA";
211000022278655	Cufflinks	exon	7	216	+	gene_id "XLOC_000541"; transcript_id "TCONS_00001064"; exon_number "1"; gene_type "lincRNA";
211000022278655	Cufflinks	exon	7	318	-	gene_id "XLOC_000544"; transcript_id "TCONS_00001068"; exon_number "1"; gene_type "lincRNA";
211000022278774	Cufflinks	exon	477	698	-	gene_id "XLOC_000634"; transcript_id "TCONS_00001258"; exon_number "1"; gene_type "lincRNA";
211000022278833	Cufflinks	exon	128	341	+	gene_id "XLOC_000724"; transcript_id "TCONS_00001440"; exon_number "1"; gene_type "lincRNA";
211000022278853	Cufflinks	exon	770	1157	+	gene_id "XLOC_000756"; transcript_id "TCONS_00001506"; exon_number "1"; gene_type "lincRNA";
211000022278882	Scripture	exon	192	641	+	gene_id "XLOC_000794"; transcript_id "TCONS_00001565"; exon_number "1"; gene_type "lincRNA";
211000022278911	Cufflinks	exon	47	259	+	gene_id "XLOC_000836"; transcript_id "TCONS_00001647"; exon_number "1"; gene_type "lincRNA";
211000022278921	Scripture	exon	26	1423	+	gene_id "XLOC_000847"; transcript_id "TCONS_00001667"; exon_number "1"; gene_type "lincRNA";
211000022278928	Cufflinks	exon	467	666	+	gene_id "XLOC_000860"; transcript_id "TCONS_00001686"; exon_number "1"; gene_type "lincRNA";
211000022278928	Cufflinks	exon	453	670	-	gene_id "XLOC_000861"; transcript_id "TCONS_00001685"; exon_number "1"; gene_type "lincRNA";
211000022278942	Cufflinks	exon	1730	1773	+	gene_id "XLOC_000873"; transcript_id "TCONS_00001721"; exon_number "1"; gene_type "lincRNA";
211000022278942	Cufflinks	exon	1838	2375	+	gene_id "XLOC_000873"; transcript_id "TCONS_00001721"; exon_number "2"; gene_type "lincRNA";
211000022278976	Cufflinks	exon	1095	1297	-	gene_id "XLOC_000902"; transcript_id "TCONS_00001759"; exon_number "1"; gene_type "lincRNA";
211000022279006	Cufflinks	exon	21	608	+	gene_id "XLOC_000916"; transcript_id "TCONS_00001782"; exon_number "1"; gene_type "lincRNA";
211000022279016	Cufflinks	exon	128	460	+	gene_id "XLOC_000928"; transcript_id "TCONS_00001833"; exon_number "1"; gene_type "lincRNA";
211000022279056	Cufflinks	exon	453	472	+	gene_id "XLOC_000957"; transcript_id "TCONS_00001892"; exon_number "1"; gene_type "lincRNA";
211000022279056	Cufflinks	exon	540	560	+	gene_id "XLOC_000957"; transcript_id "TCONS_00001892"; exon_number "2"; gene_type "lincRNA";
211000022279056	Cufflinks	exon	678	764	+	gene_id "XLOC_000957"; transcript_id "TCONS_00001892"; exon_number "3"; gene_type "lincRNA";
211000022279056	Cufflinks	exon	832	1009	+	gene_id "XLOC_000957"; transcript_id "TCONS_00001892"; exon_number "4"; gene_type "lincRNA";
211000022279056	Cufflinks	exon	1076	1187	+	gene_id "XLOC_000957"; transcript_id "TCONS_00001892"; exon_number "5"; gene_type "lincRNA";
211000022279056	Cufflinks	exon	1249	1602	+	gene_id "XLOC_000957"; transcript_id "TCONS_00001892"; exon_number "6"; gene_type "lincRNA";
211000022279056	Cufflinks	exon	621	764	+	gene_id "XLOC_000957"; transcript_id "TCONS_00001897"; exon_number "1"; gene_type "lincRNA";
211000022279056	Cufflinks	exon	832	1009	+	gene_id "XLOC_000957"; transcript_id "TCONS_00001897"; exon_number "2"; gene_type "lincRNA";
211000022279056	Cufflinks	exon	1076	1557	+	gene_id "XLOC_000957"; transcript_id "TCONS_00001897"; exon_number "3"; gene_type "lincRNA";
211000022279066	Cufflinks	exon	63	305	-	gene_id "XLOC_000970"; transcript_id "TCONS_00001917"; exon_number "1"; gene_type "lincRNA";
211000022279078	Cufflinks	exon	1517	1729	+	gene_id "XLOC_001000"; transcript_id "TCONS_00001986"; exon_number "1"; gene_type "lincRNA";
211000022279078	Cufflinks	exon	1501	1730	-	gene_id "XLOC_001003"; transcript_id "TCONS_00001987"; exon_number "1"; gene_type "lincRNA";
211000022279081	Cufflinks	exon	9	301	-	gene_id "XLOC_001013"; transcript_id "TCONS_00002005"; exon_number "1"; gene_type "lincRNA";
211000022279081	Cufflinks	exon	415	1060	-	gene_id "XLOC_001014"; transcript_id "TCONS_00002006"; exon_number "1"; gene_type "lincRNA";
211000022279082	Cufflinks	exon	1339	1541	+	gene_id "XLOC_001019"; transcript_id "TCONS_00002026"; exon_number "1"; gene_type "lincRNA";
211000022279103	Cufflinks	exon	720	1001	-	gene_id "XLOC_001059"; transcript_id "TCONS_00002123"; exon_number "1"; gene_type "lincRNA";
211000022279218	Cufflinks	exon	796	1015	-	gene_id "XLOC_001145"; transcript_id "TCONS_00002309"; exon_number "1"; gene_type "lincRNA";
211000022279246	Cufflinks	exon	9	1536	+	gene_id "XLOC_001163"; transcript_id "TCONS_00002348"; exon_number "1"; gene_type "lincRNA";
211000022279356	Cufflinks	exon	151	490	+	gene_id "XLOC_001276"; transcript_id "TCONS_00002606"; exon_number "1"; gene_type "lincRNA";
211000022279388	Cufflinks	exon	807	1260	+	gene_id "XLOC_001297"; transcript_id "TCONS_00002630"; exon_number "1"; gene_type "lincRNA";
211000022279430	Cufflinks	exon	366	599	-	gene_id "XLOC_001318"; transcript_id "TCONS_00002669"; exon_number "1"; gene_type "lincRNA";
211000022279501	Cufflinks	exon	774	1061	+	gene_id "XLOC_001372"; transcript_id "TCONS_00002822"; exon_number "1"; gene_type "lincRNA";
211000022279542	Cufflinks	exon	45	327	+	gene_id "XLOC_001439"; transcript_id "TCONS_00002990"; exon_number "1"; gene_type "lincRNA";
211000022279605	Cufflinks	exon	6	1085	+	gene_id "XLOC_001501"; transcript_id "TCONS_00003126"; exon_number "1"; gene_type "lincRNA";
211000022279605	Cufflinks	exon	1	1081	-	gene_id "XLOC_001502"; transcript_id "TCONS_00003125"; exon_number "1"; gene_type "lincRNA";
211000022279810	Scripture	exon	17	203	-	gene_id "XLOC_001635"; transcript_id "TCONS_00003463"; exon_number "1"; gene_type "lincRNA";
211000022279810	Scripture	exon	279	555	-	gene_id "XLOC_001635"; transcript_id "TCONS_00003463"; exon_number "2"; gene_type "lincRNA";
211000022279991	Cufflinks	exon	87	330	-	gene_id "XLOC_001821"; transcript_id "TCONS_00003895"; exon_number "1"; gene_type "lincRNA";
211000022280302	Cufflinks	exon	1247	1502	-	gene_id "XLOC_002137"; transcript_id "TCONS_00004570"; exon_number "1"; gene_type "lincRNA";
211000022280453	Cufflinks	exon	1337	1548	+	gene_id "XLOC_002192"; transcript_id "TCONS_00004723"; exon_number "1"; gene_type "lincRNA";
211000022280534	Cufflinks	exon	1394	1599	+	gene_id "XLOC_002322"; transcript_id "TCONS_00005150"; exon_number "1"; gene_type "lincRNA";
211000022280577	Cufflinks	exon	2200	3011	-	gene_id "XLOC_002415"; transcript_id "TCONS_00005282"; exon_number "1"; gene_type "lincRNA";
211000022280593	Cufflinks	exon	694	922	+	gene_id "XLOC_002454"; transcript_id "TCONS_00005369"; exon_number "1"; gene_type "lincRNA";
211000022280607	Cufflinks	exon	828	1087	-	gene_id "XLOC_002495"; transcript_id "TCONS_00005456"; exon_number "1"; gene_type "lincRNA";
211000022280607	Cufflinks	exon	4282	4513	-	gene_id "XLOC_002499"; transcript_id "TCONS_00005450"; exon_number "1"; gene_type "lincRNA";
211000022280641	Cufflinks	exon	125	433	+	gene_id "XLOC_002565"; transcript_id "TCONS_00005649"; exon_number "1"; gene_type "lincRNA";
211000022280687	Cufflinks	exon	1941	2152	+	gene_id "XLOC_002657"; transcript_id "TCONS_00005958"; exon_number "1"; gene_type "lincRNA";
211000022280687	Cufflinks	exon	1931	2167	-	gene_id "XLOC_002658"; transcript_id "TCONS_00005959"; exon_number "1"; gene_type "lincRNA";
2L	Cufflinks	exon	289056	289256	+	gene_id "XLOC_002734"; transcript_id "TCONS_00112415"; exon_number "1"; gene_type "anti-sense_lncRNA";
2L	Cufflinks	exon	683569	683770	+	gene_id "XLOC_002994"; transcript_id "TCONS_00031530"; exon_number "1"; gene_type "intronic_lncRNA";
2L	Cufflinks	exon	720829	721057	+	gene_id "XLOC_003026"; transcript_id "TCONS_00031557"; exon_number "1"; gene_type "lincRNA";
2L	Cufflinks	exon	1027251	1027466	+	gene_id "XLOC_003284"; transcript_id "TCONS_00078072"; exon_number "1"; gene_type "intronic_lncRNA";
2L	Cufflinks	exon	1215916	1216119	+	gene_id "XLOC_003385"; transcript_id "TCONS_00031817"; exon_number "1"; gene_type "lincRNA";
2L	Cufflinks	exon	1556965	1557174	+	gene_id "XLOC_003865"; transcript_id "TCONS_00006952"; exon_number "1"; gene_type "intronic_lncRNA";
2L	Cufflinks	exon	1693342	1693550	+	gene_id "XLOC_003980"; transcript_id "TCONS_00007046"; exon_number "1"; gene_type "intronic_lncRNA";
2L	Cufflinks	exon	1721834	1722055	+	gene_id "XLOC_004055"; transcript_id "TCONS_00097366"; exon_number "1"; gene_type "intronic_lncRNA";
2L	Cufflinks	exon	1947956	1948204	+	gene_id "XLOC_004207"; transcript_id "TCONS_00058159"; exon_number "1"; gene_type "lincRNA";
2L	Cufflinks	exon	1970657	1970866	+	gene_id "XLOC_004233"; transcript_id "TCONS_00032309"; exon_number "1"; gene_type "lincRNA";
2L	Cufflinks	exon	1989461	1989841	+	gene_id "XLOC_004242"; transcript_id "TCONS_00097418"; exon_number "1"; gene_type "lincRNA";
2L	Cufflinks	exon	1989913	1990377	+	gene_id "XLOC_004242"; transcript_id "TCONS_00097418"; exon_number "2"; gene_type "lincRNA";
2L	Cufflinks	exon	2086149	2086362	+	gene_id "XLOC_004337"; transcript_id "TCONS_00032387"; exon_number "1"; gene_type "intronic_lncRNA";
2L	Cufflinks	exon	2651980	2652188	+	gene_id "XLOC_004877"; transcript_id "TCONS_00078895"; exon_number "1"; gene_type "anti-sense_lncRNA";
2L	Cufflinks	exon	2688582	2688799	+	gene_id "XLOC_004927"; transcript_id "TCONS_00078927"; exon_number "1"; gene_type "intronic_lncRNA";
2L	Cufflinks	exon	2710072	2710288	+	gene_id "XLOC_004965"; transcript_id "TCONS_00032840"; exon_number "1"; gene_type "intronic_lncRNA";
2L	Cufflinks	exon	3136157	3136370	+	gene_id "XLOC_005199"; transcript_id "TCONS_00058733"; exon_number "1"; gene_type "intronic_lncRNA";
2L	Cufflinks	exon	3220338	3220545	+	gene_id "XLOC_005278"; transcript_id "TCONS_00033022"; exon_number "1"; gene_type "lincRNA";
2L	Cufflinks	exon	3285345	3285544	+	gene_id "XLOC_005376"; transcript_id "TCONS_00079127"; exon_number "1"; gene_type "lincRNA";
2L	Cufflinks	exon	3381288	3381493	+	gene_id "XLOC_005423"; transcript_id "TCONS_00033106"; exon_number "1"; gene_type "lincRNA";
2L	Cufflinks	exon	3423026	3423125	+	gene_id "XLOC_005483"; transcript_id "TCONS_00058837"; exon_number "1"; gene_type "anti-sense_lncRNA";
2L	Cufflinks	exon	3432215	3432389	+	gene_id "XLOC_005483"; transcript_id "TCONS_00058837"; exon_number "2"; gene_type "anti-sense_lncRNA";
2L	Cufflinks	exon	3476360	3477011	+	gene_id "XLOC_005540"; transcript_id "TCONS_00097953"; exon_number "1"; gene_type "lincRNA";
2L	Cufflinks	exon	3477077	3477577	+	gene_id "XLOC_005540"; transcript_id "TCONS_00097953"; exon_number "2"; gene_type "lincRNA";
2L	Cufflinks	exon	3616305	3616516	+	gene_id "XLOC_005682"; transcript_id "TCONS_00008130"; exon_number "1"; gene_type "lincRNA";
2L	Cufflinks	exon	3616668	3617915	+	gene_id "XLOC_005682"; transcript_id "TCONS_00008130"; exon_number "2"; gene_type "lincRNA";
2L	Cufflinks	exon	3667186	3667409	+	gene_id "XLOC_005708"; transcript_id "TCONS_00079303"; exon_number "1"; gene_type "intronic_lncRNA";
2L	Cufflinks	exon	3846468	3846671	+	gene_id "XLOC_005873"; transcript_id "TCONS_00008298"; exon_number "1"; gene_type "lincRNA";
2L	Cufflinks	exon	3857792	3857992	+	gene_id "XLOC_005893"; transcript_id "TCONS_00008305"; exon_number "1"; gene_type "lincRNA";
2L	Cufflinks	exon	4585796	4586053	+	gene_id "XLOC_006488"; transcript_id "TCONS_00008703"; exon_number "1"; gene_type "intronic_lncRNA";
2L	Cufflinks	exon	4746680	4746929	+	gene_id "XLOC_006681"; transcript_id "TCONS_00079808"; exon_number "1"; gene_type "intronic_lncRNA";
2L	Cufflinks	exon	5508950	5509159	+	gene_id "XLOC_007184"; transcript_id "TCONS_00034298"; exon_number "1"; gene_type "lincRNA";
2L	Cufflinks	exon	5847352	5847551	+	gene_id "XLOC_007506"; transcript_id "TCONS_00059968"; exon_number "1"; gene_type "intronic_lncRNA";
2L	Cufflinks	exon	5874603	5874811	+	gene_id "XLOC_007531"; transcript_id "TCONS_00034532"; exon_number "1"; gene_type "intronic_lncRNA";
2L	Cufflinks	exon	6079737	6079834	+	gene_id "XLOC_007686"; transcript_id "TCONS_00080319"; exon_number "1"; gene_type "lincRNA";
2L	Cufflinks	exon	6079892	6080022	+	gene_id "XLOC_007686"; transcript_id "TCONS_00080319"; exon_number "2"; gene_type "lincRNA";
2L	Cufflinks	exon	6086716	6086982	+	gene_id "XLOC_007695"; transcript_id "TCONS_00080323"; exon_number "1"; gene_type "intronic_lncRNA";
2L	Cufflinks	exon	6319133	6319344	+	gene_id "XLOC_007983"; transcript_id "TCONS_00009707"; exon_number "1"; gene_type "intronic_lncRNA";
2L	Cufflinks	exon	6321249	6321460	+	gene_id "XLOC_007987"; transcript_id "TCONS_00080487"; exon_number "1"; gene_type "intronic_lncRNA";
2L	Cufflinks	exon	6547315	6547335	+	gene_id "XLOC_008083"; transcript_id "TCONS_00034923"; exon_number "1"; gene_type "lincRNA";
2L	Cufflinks	exon	6551852	6552374	+	gene_id "XLOC_008083"; transcript_id "TCONS_00034923"; exon_number "2"; gene_type "lincRNA";
2L	Cufflinks	exon	6703102	6703330	+	gene_id "XLOC_008196"; transcript_id "TCONS_00009824"; exon_number "1"; gene_type "intronic_lncRNA";
2L	Cufflinks	exon	6707458	6707681	+	gene_id "XLOC_008202"; transcript_id "TCONS_00080585"; exon_number "1"; gene_type "intronic_lncRNA";
2L	Scripture	exon	6866329	6867063	+	gene_id "XLOC_008357"; transcript_id "TCONS_00182447"; exon_number "1"; gene_type "intronic_lncRNA";
2L	Scripture	exon	6869002	6869354	+	gene_id "XLOC_008357"; transcript_id "TCONS_00182447"; exon_number "2"; gene_type "intronic_lncRNA";
2L	Cufflinks	exon	6872724	6873058	+	gene_id "XLOC_008357"; transcript_id "TCONS_00035084"; exon_number "1"; gene_type "lincRNA";
2L	Cufflinks	exon	6873130	6873680	+	gene_id "XLOC_008357"; transcript_id "TCONS_00035084"; exon_number "2"; gene_type "lincRNA";
2L	Cufflinks	exon	7113473	7113720	+	gene_id "XLOC_008508"; transcript_id "TCONS_00060452"; exon_number "1"; gene_type "intronic_lncRNA";
2L	Cufflinks	exon	7142284	7142503	+	gene_id "XLOC_008538"; transcript_id "TCONS_00010013"; exon_number "1"; gene_type "intronic_lncRNA";
2L	Cufflinks	exon	7212016	7212223	+	gene_id "XLOC_008606"; transcript_id "TCONS_00080730"; exon_number "1"; gene_type "intronic_lncRNA";
2L	Cufflinks	exon	7262264	7262463	+	gene_id "XLOC_008645"; transcript_id "TCONS_00035218"; exon_number "1"; gene_type "intronic_lncRNA";
2L	Cufflinks	exon	7350486	7350691	+	gene_id "XLOC_008775"; transcript_id "TCONS_00010106"; exon_number "1"; gene_type "intronic_lncRNA";
2L	Scripture	exon	7423857	7423976	+	gene_id "XLOC_008833"; transcript_id "TCONS_00182517"; exon_number "1"; gene_type "lincRNA";
2L	Scripture	exon	7425172	7426218	+	gene_id "XLOC_008833"; transcript_id "TCONS_00182517"; exon_number "2"; gene_type "lincRNA";
2L	Scripture	exon	7423859	7423991	+	gene_id "XLOC_008833"; transcript_id "TCONS_00169868"; exon_number "1"; gene_type "lincRNA";
2L	Scripture	exon	7425172	7426420	+	gene_id "XLOC_008833"; transcript_id "TCONS_00169868"; exon_number "2"; gene_type "lincRNA";
2L	Scripture	exon	7423859	7424363	+	gene_id "XLOC_008833"; transcript_id "TCONS_00010148"; exon_number "1"; gene_type "lincRNA";
2L	Scripture	exon	7425172	7426420	+	gene_id "XLOC_008833"; transcript_id "TCONS_00010148"; exon_number "2"; gene_type "lincRNA";
2L	Cufflinks	exon	7555063	7555271	+	gene_id "XLOC_008925"; transcript_id "TCONS_00010185"; exon_number "1"; gene_type "intronic_lncRNA";
2L	Cufflinks	exon	7602217	7602426	+	gene_id "XLOC_008975"; transcript_id "TCONS_00010213"; exon_number "1"; gene_type "lincRNA";
2L	Cufflinks	exon	7844653	7844874	+	gene_id "XLOC_009157"; transcript_id "TCONS_00060730"; exon_number "1"; gene_type "lincRNA";
2L	Cufflinks	exon	8236903	8237144	+	gene_id "XLOC_009321"; transcript_id "TCONS_00035599"; exon_number "1"; gene_type "intronic_lncRNA";
2L	Cufflinks	exon	8295799	8296008	+	gene_id "XLOC_009352"; transcript_id "TCONS_00010440"; exon_number "1"; gene_type "intronic_lncRNA";
2L	Cufflinks	exon	8330052	8330280	+	gene_id "XLOC_009373"; transcript_id "TCONS_00035611"; exon_number "1"; gene_type "intronic_lncRNA";
2L	Cufflinks	exon	8389310	8389553	+	gene_id "XLOC_009412"; transcript_id "TCONS_00010485"; exon_number "1"; gene_type "anti-sense_lncRNA";
2L	Cufflinks	exon	8394446	8394779	+	gene_id "XLOC_009418"; transcript_id "TCONS_00010487"; exon_number "1"; gene_type "anti-sense_lncRNA";
2L	Cufflinks	exon	8433619	8433820	+	gene_id "XLOC_009431"; transcript_id "TCONS_00060826"; exon_number "1"; gene_type "lincRNA";
2L	Cufflinks	exon	8470053	8470271	+	gene_id "XLOC_009446"; transcript_id "TCONS_00035657"; exon_number "1"; gene_type "intronic_lncRNA";
2L	Cufflinks	exon	8760501	8760702	+	gene_id "XLOC_009600"; transcript_id "TCONS_00010624"; exon_number "1"; gene_type "lincRNA";
2L	Cufflinks	exon	8882107	8882310	+	gene_id "XLOC_009773"; transcript_id "TCONS_00035868"; exon_number "1"; gene_type "lincRNA";
2L	Cufflinks	exon	8906540	8908534	+	gene_id "XLOC_009798"; transcript_id "TCONS_00115887"; exon_number "1"; gene_type "intronic_lncRNA";
2L	Cufflinks	exon	8908596	8909815	+	gene_id "XLOC_009798"; transcript_id "TCONS_00115887"; exon_number "2"; gene_type "intronic_lncRNA";
2L	Cufflinks	exon	8974760	8974973	+	gene_id "XLOC_009834"; transcript_id "TCONS_00035907"; exon_number "1"; gene_type "anti-sense_lncRNA";
2L	Cufflinks	exon	9104007	9104212	+	gene_id "XLOC_009989"; transcript_id "TCONS_00134944"; exon_number "1"; gene_type "lincRNA";
2L	Cufflinks	exon	9180811	9181053	+	gene_id "XLOC_010097"; transcript_id "TCONS_00010899"; exon_number "1"; gene_type "intronic_lncRNA";
2L	Cufflinks	exon	9377053	9377261	+	gene_id "XLOC_010226"; transcript_id "TCONS_00010981"; exon_number "1"; gene_type "intronic_lncRNA";
2L	Cufflinks	exon	9470327	9470345	+	gene_id "XLOC_010279"; transcript_id "TCONS_00011030"; exon_number "1"; gene_type "lincRNA";
2L	Cufflinks	exon	9470420	9470628	+	gene_id "XLOC_010279"; transcript_id "TCONS_00011030"; exon_number "2"; gene_type "lincRNA";
2L	Cufflinks	exon	9625958	9626163	+	gene_id "XLOC_010378"; transcript_id "TCONS_00011098"; exon_number "1"; gene_type "lincRNA";
2L	Cufflinks	exon	9820467	9820666	+	gene_id "XLOC_010524"; transcript_id "TCONS_00011188"; exon_number "1"; gene_type "intronic_lncRNA";
2L	Cufflinks	exon	10043952	10044187	+	gene_id "XLOC_010702"; transcript_id "TCONS_00061447"; exon_number "1"; gene_type "lincRNA";
2L	Cufflinks	exon	10120001	10120202	+	gene_id "XLOC_010814"; transcript_id "TCONS_00011350"; exon_number "1"; gene_type "anti-sense_lncRNA";
2L	Scripture	exon	10297705	10297936	+	gene_id "XLOC_010902"; transcript_id "TCONS_00170440"; exon_number "1"; gene_type "anti-sense_lncRNA";
2L	Cufflinks	exon	10524283	10524496	+	gene_id "XLOC_010976"; transcript_id "TCONS_00061576"; exon_number "1"; gene_type "lincRNA";
2L	Cufflinks	exon	10570384	10570587	+	gene_id "XLOC_011037"; transcript_id "TCONS_00036670"; exon_number "1"; gene_type "intronic_lncRNA";
2L	Cufflinks	exon	10695075	10698184	+	gene_id "XLOC_011186"; transcript_id "TCONS_00011579"; exon_number "1"; gene_type "anti-sense_lncRNA";
2L	Cufflinks	exon	10827435	10827639	+	gene_id "XLOC_011296"; transcript_id "TCONS_00061685"; exon_number "1"; gene_type "intronic_lncRNA";
2L	Cufflinks	exon	10936427	10936629	+	gene_id "XLOC_011398"; transcript_id "TCONS_00036893"; exon_number "1"; gene_type "intronic_lncRNA";
2L	Cufflinks	exon	11243822	11244028	+	gene_id "XLOC_011626"; transcript_id "TCONS_00135659"; exon_number "1"; gene_type "intronic_lncRNA";
2L	Cufflinks	exon	11289657	11289857	+	gene_id "XLOC_011650"; transcript_id "TCONS_00011834"; exon_number "1"; gene_type "lincRNA";
2L	Cufflinks	exon	11354327	11354528	+	gene_id "XLOC_011760"; transcript_id "TCONS_00082086"; exon_number "1"; gene_type "lincRNA";
2L	Cufflinks	exon	11736431	11736801	+	gene_id "XLOC_012280"; transcript_id "TCONS_00012211"; exon_number "1"; gene_type "lincRNA";
2L	Cufflinks	exon	11736871	11737546	+	gene_id "XLOC_012280"; transcript_id "TCONS_00012211"; exon_number "2"; gene_type "lincRNA";
2L	Cufflinks	exon	11758267	11758474	+	gene_id "XLOC_012306"; transcript_id "TCONS_00012230"; exon_number "1"; gene_type "lincRNA";
2L	Cufflinks	exon	12198516	12198722	+	gene_id "XLOC_012722"; transcript_id "TCONS_00082524"; exon_number "1"; gene_type "intronic_lncRNA";
2L	Cufflinks	exon	12344804	12345010	+	gene_id "XLOC_012860"; transcript_id "TCONS_00037829"; exon_number "1"; gene_type "intronic_lncRNA";
2L	Cufflinks	exon	12394918	12395155	+	gene_id "XLOC_012921"; transcript_id "TCONS_00012616"; exon_number "1"; gene_type "intronic_lncRNA";
2L	Cufflinks	exon	12527734	12527979	+	gene_id "XLOC_012991"; transcript_id "TCONS_00037883"; exon_number "1"; gene_type "intronic_lncRNA";
2L	Cufflinks	exon	12568811	12569011	+	gene_id "XLOC_013027"; transcript_id "TCONS_00136321"; exon_number "1"; gene_type "lincRNA";
2L	Cufflinks	exon	12593363	12593580	+	gene_id "XLOC_013075"; transcript_id "TCONS_00117402"; exon_number "1"; gene_type "intronic_lncRNA";
2L	Cufflinks	exon	12606425	12606646	+	gene_id "XLOC_013097"; transcript_id "TCONS_00037933"; exon_number "1"; gene_type "intronic_lncRNA";
2L	Cufflinks	exon	12830079	12830281	+	gene_id "XLOC_013338"; transcript_id "TCONS_00038104"; exon_number "1"; gene_type "lincRNA";
2L	Cufflinks	exon	12910232	12910470	+	gene_id "XLOC_013460"; transcript_id "TCONS_00136492"; exon_number "1"; gene_type "lincRNA";
2L	Cufflinks	exon	12990164	12990374	+	gene_id "XLOC_013567"; transcript_id "TCONS_00062743"; exon_number "1"; gene_type "lincRNA";
2L	Cufflinks	exon	13041365	13041579	+	gene_id "XLOC_013589"; transcript_id "TCONS_00038255"; exon_number "1"; gene_type "intronic_lncRNA";
2L	Cufflinks	exon	13052111	13052316	+	gene_id "XLOC_013599"; transcript_id "TCONS_00117656"; exon_number "1"; gene_type "intronic_lncRNA";
2L	Cufflinks	exon	13174104	13175267	+	gene_id "XLOC_013739"; transcript_id "TCONS_00013087"; exon_number "1"; gene_type "intronic_lncRNA";
2L	Scripture	exon	13211905	13212024	+	gene_id "XLOC_013744"; transcript_id "TCONS_00170779"; exon_number "1"; gene_type "anti-sense_lncRNA";
2L	Scripture	exon	13215898	13216408	+	gene_id "XLOC_013744"; transcript_id "TCONS_00170779"; exon_number "2"; gene_type "anti-sense_lncRNA";
2L	Cufflinks	exon	13479250	13479481	+	gene_id "XLOC_013901"; transcript_id "TCONS_00136741"; exon_number "1"; gene_type "intronic_lncRNA";
2L	Cufflinks	exon	14116519	14116718	+	gene_id "XLOC_014300"; transcript_id "TCONS_00038793"; exon_number "1"; gene_type "lincRNA";
2L	Cufflinks	exon	14173601	14173862	+	gene_id "XLOC_014367"; transcript_id "TCONS_00038856"; exon_number "1"; gene_type "intronic_lncRNA";
2L	Cufflinks	exon	14190778	14191011	+	gene_id "XLOC_014386"; transcript_id "TCONS_00063287"; exon_number "1"; gene_type "intronic_lncRNA";
2L	Cufflinks	exon	14439924	14440131	+	gene_id "XLOC_014628"; transcript_id "TCONS_00137147"; exon_number "1"; gene_type "lincRNA";
2L	Cufflinks	exon	14564404	14564608	+	gene_id "XLOC_014801"; transcript_id "TCONS_00039190"; exon_number "1"; gene_type "lincRNA";
2L	Cufflinks	exon	14669297	14669512	+	gene_id "XLOC_014892"; transcript_id "TCONS_00063559"; exon_number "1"; gene_type "intronic_lncRNA";
2L	Cufflinks	exon	14670327	14670526	+	gene_id "XLOC_014893"; transcript_id "TCONS_00013969"; exon_number "1"; gene_type "intronic_lncRNA";
2L	Cufflinks	exon	14679226	14679425	+	gene_id "XLOC_014901"; transcript_id "TCONS_00101573"; exon_number "1"; gene_type "intronic_lncRNA";
2L	Cufflinks	exon	14890997	14891215	+	gene_id "XLOC_015184"; transcript_id "TCONS_00039454"; exon_number "1"; gene_type "lincRNA";
2L	Cufflinks	exon	14896363	14896573	+	gene_id "XLOC_015191"; transcript_id "TCONS_00101660"; exon_number "1"; gene_type "lincRNA";
2L	Cufflinks	exon	15156904	15157113	+	gene_id "XLOC_015430"; transcript_id "TCONS_00014280"; exon_number "1"; gene_type "lincRNA";
2L	Cufflinks	exon	15408534	15408744	+	gene_id "XLOC_015726"; transcript_id "TCONS_00063962"; exon_number "1"; gene_type "lincRNA";
2L	Cufflinks	exon	15468610	15468813	+	gene_id "XLOC_015807"; transcript_id "TCONS_00014498"; exon_number "1"; gene_type "lincRNA";
2L	Cufflinks	exon	15554289	15554495	+	gene_id "XLOC_015916"; transcript_id "TCONS_00101948"; exon_number "1"; gene_type "intronic_lncRNA";
2L	Cufflinks	exon	15626685	15626886	+	gene_id "XLOC_015986"; transcript_id "TCONS_00118999"; exon_number "1"; gene_type "lincRNA";
2L	Scripture	exon	15746455	15746460	+	gene_id "XLOC_016010"; transcript_id "TCONS_00170941"; exon_number "1"; gene_type "intronic_lncRNA";
2L	Scripture	exon	15746519	15747205	+	gene_id "XLOC_016010"; transcript_id "TCONS_00170941"; exon_number "2"; gene_type "intronic_lncRNA";
2L	Cufflinks	exon	15869400	15869600	+	gene_id "XLOC_016136"; transcript_id "TCONS_00064192"; exon_number "1"; gene_type "lincRNA";
2L	Cufflinks	exon	15997316	15997523	+	gene_id "XLOC_016284"; transcript_id "TCONS_00084288"; exon_number "1"; gene_type "lincRNA";
2L	Cufflinks	exon	16066862	16067084	+	gene_id "XLOC_016359"; transcript_id "TCONS_00014877"; exon_number "1"; gene_type "intronic_lncRNA";
2L	Cufflinks	exon	16181539	16181774	+	gene_id "XLOC_016509"; transcript_id "TCONS_00014965"; exon_number "1"; gene_type "intronic_lncRNA";
2L	Cufflinks	exon	16397494	16397694	+	gene_id "XLOC_016706"; transcript_id "TCONS_00040532"; exon_number "1"; gene_type "lincRNA";
2L	Cufflinks	exon	16562806	16563021	+	gene_id "XLOC_016861"; transcript_id "TCONS_00138189"; exon_number "1"; gene_type "intronic_lncRNA";
2L	Cufflinks	exon	16986193	16986433	+	gene_id "XLOC_017131"; transcript_id "TCONS_00138362"; exon_number "1"; gene_type "intronic_lncRNA";
2L	Cufflinks	exon	17338675	17338880	+	gene_id "XLOC_017629"; transcript_id "TCONS_00064956"; exon_number "1"; gene_type "lincRNA";
2L	Cufflinks	exon	17355800	17356005	+	gene_id "XLOC_017662"; transcript_id "TCONS_00041211"; exon_number "1"; gene_type "lincRNA";
2L	Cufflinks	exon	17552461	17552662	+	gene_id "XLOC_017768"; transcript_id "TCONS_00065036"; exon_number "1"; gene_type "lincRNA";
2L	Cufflinks	exon	17582129	17582341	+	gene_id "XLOC_017811"; transcript_id "TCONS_00015770"; exon_number "1"; gene_type "lincRNA";
2L	Cufflinks	exon	17642517	17642716	+	gene_id "XLOC_017897"; transcript_id "TCONS_00065100"; exon_number "1"; gene_type "lincRNA";
2L	Cufflinks	exon	18316258	18316465	+	gene_id "XLOC_018647"; transcript_id "TCONS_00041812"; exon_number "1"; gene_type "lincRNA";
2L	Cufflinks	exon	18404807	18405029	+	gene_id "XLOC_018677"; transcript_id "TCONS_00041836"; exon_number "1"; gene_type "lincRNA";
2L	Cufflinks	exon	18406448	18406649	+	gene_id "XLOC_018680"; transcript_id "TCONS_00085369"; exon_number "1"; gene_type "lincRNA";
2L	Cufflinks	exon	18439973	18440232	+	gene_id "XLOC_018729"; transcript_id "TCONS_00041868"; exon_number "1"; gene_type "lincRNA";
2L	Cufflinks	exon	18440356	18440621	+	gene_id "XLOC_018729"; transcript_id "TCONS_00041868"; exon_number "2"; gene_type "lincRNA";
2L	Cufflinks	exon	18455518	18455963	+	gene_id "XLOC_018733"; transcript_id "TCONS_00016255"; exon_number "1"; gene_type "anti-sense_lncRNA";
2L	Cufflinks	exon	18470869	18470931	+	gene_id "XLOC_018733"; transcript_id "TCONS_00016255"; exon_number "2"; gene_type "anti-sense_lncRNA";
2L	Cufflinks	exon	18471154	18471197	+	gene_id "XLOC_018733"; transcript_id "TCONS_00016255"; exon_number "3"; gene_type "anti-sense_lncRNA";
2L	Cufflinks	exon	18471259	18473030	+	gene_id "XLOC_018733"; transcript_id "TCONS_00016255"; exon_number "4"; gene_type "anti-sense_lncRNA";
2L	Cufflinks	exon	18455518	18455963	+	gene_id "XLOC_018733"; transcript_id "TCONS_00016254"; exon_number "1"; gene_type "anti-sense_lncRNA";
2L	Cufflinks	exon	18470869	18470928	+	gene_id "XLOC_018733"; transcript_id "TCONS_00016254"; exon_number "2"; gene_type "anti-sense_lncRNA";
2L	Cufflinks	exon	18471154	18471197	+	gene_id "XLOC_018733"; transcript_id "TCONS_00016254"; exon_number "3"; gene_type "anti-sense_lncRNA";
2L	Cufflinks	exon	18471259	18473030	+	gene_id "XLOC_018733"; transcript_id "TCONS_00016254"; exon_number "4"; gene_type "anti-sense_lncRNA";
2L	Scripture	exon	18455690	18455814	+	gene_id "XLOC_018733"; transcript_id "TCONS_00178308"; exon_number "1"; gene_type "lincRNA";
2L	Scripture	exon	18455869	18457956	+	gene_id "XLOC_018733"; transcript_id "TCONS_00178308"; exon_number "2"; gene_type "lincRNA";
2L	Cufflinks	exon	18455740	18455814	+	gene_id "XLOC_018733"; transcript_id "TCONS_00085390"; exon_number "1"; gene_type "lincRNA";
2L	Cufflinks	exon	18455869	18455963	+	gene_id "XLOC_018733"; transcript_id "TCONS_00085390"; exon_number "2"; gene_type "lincRNA";
2L	Cufflinks	exon	18470869	18470931	+	gene_id "XLOC_018733"; transcript_id "TCONS_00085390"; exon_number "3"; gene_type "lincRNA";
2L	Cufflinks	exon	18471154	18471197	+	gene_id "XLOC_018733"; transcript_id "TCONS_00085390"; exon_number "4"; gene_type "lincRNA";
2L	Cufflinks	exon	18471259	18472537	+	gene_id "XLOC_018733"; transcript_id "TCONS_00085390"; exon_number "5"; gene_type "lincRNA";
2L	Cufflinks	exon	18468447	18468650	+	gene_id "XLOC_018744"; transcript_id "TCONS_00016268"; exon_number "1"; gene_type "lincRNA";
2L	Cufflinks	exon	18574494	18574504	+	gene_id "XLOC_018797"; transcript_id "TCONS_00041909"; exon_number "1"; gene_type "intronic_lncRNA";
2L	Cufflinks	exon	18579323	18579674	+	gene_id "XLOC_018797"; transcript_id "TCONS_00041909"; exon_number "2"; gene_type "intronic_lncRNA";
2L	Cufflinks	exon	18760608	18760808	+	gene_id "XLOC_018917"; transcript_id "TCONS_00065582"; exon_number "1"; gene_type "lincRNA";
2L	Cufflinks	exon	18903158	18903358	+	gene_id "XLOC_019064"; transcript_id "TCONS_00016478"; exon_number "1"; gene_type "lincRNA";
2L	Cufflinks	exon	18906364	18906568	+	gene_id "XLOC_019070"; transcript_id "TCONS_00016481"; exon_number "1"; gene_type "lincRNA";
2L	Cufflinks	exon	19109065	19109227	+	gene_id "XLOC_019196"; transcript_id "TCONS_00016579"; exon_number "1"; gene_type "lincRNA";
2L	Cufflinks	exon	19109419	19109493	+	gene_id "XLOC_019196"; transcript_id "TCONS_00016579"; exon_number "2"; gene_type "lincRNA";
2L	Cufflinks	exon	19212744	19212962	+	gene_id "XLOC_019229"; transcript_id "TCONS_00016630"; exon_number "1"; gene_type "lincRNA";
2L	Cufflinks	exon	19316810	19317009	+	gene_id "XLOC_019411"; transcript_id "TCONS_00065852"; exon_number "1"; gene_type "lincRNA";
2L	Cufflinks	exon	19812655	19813509	+	gene_id "XLOC_019637"; transcript_id "TCONS_00120716"; exon_number "1"; gene_type "intronic_lncRNA";
2L	Cufflinks	exon	20248371	20248577	+	gene_id "XLOC_019952"; transcript_id "TCONS_00086079"; exon_number "1"; gene_type "lincRNA";
2L	Cufflinks	exon	20512903	20513105	+	gene_id "XLOC_020146"; transcript_id "TCONS_00042899"; exon_number "1"; gene_type "lincRNA";
2L	Scripture	exon	20647534	20647667	+	gene_id "XLOC_020319"; transcript_id "TCONS_00198337"; exon_number "1"; gene_type "lincRNA";
2L	Scripture	exon	20648198	20648479	+	gene_id "XLOC_020319"; transcript_id "TCONS_00198337"; exon_number "2"; gene_type "lincRNA";
2L	Scripture	exon	20648785	20648860	+	gene_id "XLOC_020319"; transcript_id "TCONS_00198337"; exon_number "3"; gene_type "lincRNA";
2L	Scripture	exon	20647534	20647788	+	gene_id "XLOC_020319"; transcript_id "TCONS_00194944"; exon_number "1"; gene_type "lincRNA";
2L	Scripture	exon	20648189	20648479	+	gene_id "XLOC_020319"; transcript_id "TCONS_00194944"; exon_number "2"; gene_type "lincRNA";
2L	Scripture	exon	20648785	20648860	+	gene_id "XLOC_020319"; transcript_id "TCONS_00194944"; exon_number "3"; gene_type "lincRNA";
2L	Scripture	exon	21628391	21628586	+	gene_id "XLOC_020714"; transcript_id "TCONS_00178714"; exon_number "1"; gene_type "anti-sense_lncRNA";
2L	Scripture	exon	21628651	21629720	+	gene_id "XLOC_020714"; transcript_id "TCONS_00178714"; exon_number "2"; gene_type "anti-sense_lncRNA";
2L	Cufflinks	exon	21765344	21765551	+	gene_id "XLOC_020802"; transcript_id "TCONS_00017789"; exon_number "1"; gene_type "intronic_lncRNA";
2L	Cufflinks	exon	21803935	21804148	+	gene_id "XLOC_020838"; transcript_id "TCONS_00066738"; exon_number "1"; gene_type "lincRNA";
2L	Cufflinks	exon	22044658	22044896	+	gene_id "XLOC_021142"; transcript_id "TCONS_00066939"; exon_number "1"; gene_type "lincRNA";
2L	Cufflinks	exon	22179090	22179566	+	gene_id "XLOC_021247"; transcript_id "TCONS_00121651"; exon_number "1"; gene_type "intronic_lncRNA";
2L	Cufflinks	exon	22179632	22180206	+	gene_id "XLOC_021247"; transcript_id "TCONS_00121651"; exon_number "2"; gene_type "intronic_lncRNA";
2L	Cufflinks	exon	22193380	22193581	+	gene_id "XLOC_021259"; transcript_id "TCONS_00043692"; exon_number "1"; gene_type "intronic_lncRNA";
2L	Cufflinks	exon	22522685	22522888	+	gene_id "XLOC_021399"; transcript_id "TCONS_00067132"; exon_number "1"; gene_type "lincRNA";
2L	Cufflinks	exon	22707348	22707566	+	gene_id "XLOC_021458"; transcript_id "TCONS_00043856"; exon_number "1"; gene_type "intronic_lncRNA";
2L	Scripture	exon	71915	73642	-	gene_id "XLOC_021826"; transcript_id "TCONS_00172241"; exon_number "1"; gene_type "anti-sense_lncRNA";
2L	Scripture	exon	73755	74175	-	gene_id "XLOC_021826"; transcript_id "TCONS_00172241"; exon_number "2"; gene_type "anti-sense_lncRNA";
2L	Cufflinks	exon	521600	521823	-	gene_id "XLOC_022002"; transcript_id "TCONS_00044283"; exon_number "1"; gene_type "intronic_lncRNA";
2L	Cufflinks	exon	973800	974002	-	gene_id "XLOC_022440"; transcript_id "TCONS_00044585"; exon_number "1"; gene_type "lincRNA";
2L	Cufflinks	exon	993376	993589	-	gene_id "XLOC_022456"; transcript_id "TCONS_00067825"; exon_number "1"; gene_type "lincRNA";
2L	Cufflinks	exon	1097685	1097903	-	gene_id "XLOC_022488"; transcript_id "TCONS_00019052"; exon_number "1"; gene_type "intronic_lncRNA";
2L	Cufflinks	exon	1338192	1338401	-	gene_id "XLOC_022732"; transcript_id "TCONS_00087600"; exon_number "1"; gene_type "lincRNA";
2L	Cufflinks	exon	1432569	1432775	-	gene_id "XLOC_022860"; transcript_id "TCONS_00044841"; exon_number "1"; gene_type "lincRNA";
2L	Cufflinks	exon	1478296	1478514	-	gene_id "XLOC_022930"; transcript_id "TCONS_00068070"; exon_number "1"; gene_type "lincRNA";
2L	Cufflinks	exon	1693334	1693553	-	gene_id "XLOC_023194"; transcript_id "TCONS_00045022"; exon_number "1"; gene_type "intronic_lncRNA";
2L	Cufflinks	exon	1743071	1743271	-	gene_id "XLOC_023209"; transcript_id "TCONS_00087856"; exon_number "1"; gene_type "intronic_lncRNA";
2L	Cufflinks	exon	1760307	1760521	-	gene_id "XLOC_023227"; transcript_id "TCONS_00068227"; exon_number "1"; gene_type "lincRNA";
2L	Cufflinks	exon	1959074	1959275	-	gene_id "XLOC_023375"; transcript_id "TCONS_00045132"; exon_number "1"; gene_type "intronic_lncRNA";
2L	Cufflinks	exon	2086145	2086378	-	gene_id "XLOC_023497"; transcript_id "TCONS_00105203"; exon_number "1"; gene_type "intronic_lncRNA";
2L	Cufflinks	exon	2221470	2221679	-	gene_id "XLOC_023560"; transcript_id "TCONS_00019720"; exon_number "1"; gene_type "intronic_lncRNA";
2L	Cufflinks	exon	2259079	2259295	-	gene_id "XLOC_023585"; transcript_id "TCONS_00122970"; exon_number "1"; gene_type "lincRNA";
2L	Cufflinks	exon	2283862	2284325	-	gene_id "XLOC_023623"; transcript_id "TCONS_00019761"; exon_number "1"; gene_type "lincRNA";
2L	Cufflinks	exon	2284767	2284985	-	gene_id "XLOC_023623"; transcript_id "TCONS_00019761"; exon_number "2"; gene_type "lincRNA";
2L	Cufflinks	exon	2432488	2432701	-	gene_id "XLOC_023715"; transcript_id "TCONS_00045446"; exon_number "1"; gene_type "intronic_lncRNA";
2L	Cufflinks	exon	2526642	2526842	-	gene_id "XLOC_023841"; transcript_id "TCONS_00019911"; exon_number "1"; gene_type "lincRNA";
2L	Cufflinks	exon	2728014	2728217	-	gene_id "XLOC_024098"; transcript_id "TCONS_00141751"; exon_number "1"; gene_type "intronic_lncRNA";
2L	Cufflinks	exon	3269111	3269315	-	gene_id "XLOC_024460"; transcript_id "TCONS_00045895"; exon_number "1"; gene_type "lincRNA";
2L	Cufflinks	exon	3369321	3370138	-	gene_id "XLOC_024513"; transcript_id "TCONS_00020275"; exon_number "1"; gene_type "intronic_lncRNA";
2L	Cufflinks	exon	4132612	4132876	-	gene_id "XLOC_025288"; transcript_id "TCONS_00046403"; exon_number "1"; gene_type "lincRNA";
2L	Cufflinks	exon	4171982	4172197	-	gene_id "XLOC_025345"; transcript_id "TCONS_00046460"; exon_number "1"; gene_type "lincRNA";
2L	Cufflinks	exon	4235973	4236181	-	gene_id "XLOC_025395"; transcript_id "TCONS_00020835"; exon_number "1"; gene_type "lincRNA";
2L	Cufflinks	exon	4317143	4317344	-	gene_id "XLOC_025509"; transcript_id "TCONS_00046583"; exon_number "1"; gene_type "intronic_lncRNA";
2L	Cufflinks	exon	4337550	4337764	-	gene_id "XLOC_025525"; transcript_id "TCONS_00020903"; exon_number "1"; gene_type "intronic_lncRNA";
2L	Cufflinks	exon	4427769	4427989	-	gene_id "XLOC_025595"; transcript_id "TCONS_00046632"; exon_number "1"; gene_type "intronic_lncRNA";
2L	Scripture	exon	5264696	5265280	-	gene_id "XLOC_026015"; transcript_id "TCONS_00173024"; exon_number "1"; gene_type "anti-sense_lncRNA";
2L	Scripture	exon	5267804	5268747	-	gene_id "XLOC_026015"; transcript_id "TCONS_00173024"; exon_number "2"; gene_type "anti-sense_lncRNA";
2L	Cufflinks	exon	5096795	5097022	-	gene_id "XLOC_026025"; transcript_id "TCONS_00124089"; exon_number "1"; gene_type "intronic_lncRNA";
2L	Cufflinks	exon	5565501	5565755	-	gene_id "XLOC_026404"; transcript_id "TCONS_00021463"; exon_number "1"; gene_type "lincRNA";
2L	Cufflinks	exon	5697177	5697390	-	gene_id "XLOC_026581"; transcript_id "TCONS_00089519"; exon_number "1"; gene_type "lincRNA";
2L	Cufflinks	exon	6057393	6057631	-	gene_id "XLOC_026845"; transcript_id "TCONS_00089616"; exon_number "1"; gene_type "anti-sense_lncRNA";
2L	Cufflinks	exon	6085015	6085245	-	gene_id "XLOC_026858"; transcript_id "TCONS_00069949"; exon_number "1"; gene_type "intronic_lncRNA";
2L	Cufflinks	exon	6274027	6274229	-	gene_id "XLOC_027072"; transcript_id "TCONS_00047546"; exon_number "1"; gene_type "intronic_lncRNA";
2L	Cufflinks	exon	6281746	6281961	-	gene_id "XLOC_027078"; transcript_id "TCONS_00143016"; exon_number "1"; gene_type "intronic_lncRNA";
2L	Cufflinks	exon	6741082	6741299	-	gene_id "XLOC_027400"; transcript_id "TCONS_00070196"; exon_number "1"; gene_type "lincRNA";
2L	Scripture	exon	7048840	7048958	-	gene_id "XLOC_027607"; transcript_id "TCONS_00173240"; exon_number "1"; gene_type "intronic_lncRNA";
2L	Scripture	exon	7049176	7049747	-	gene_id "XLOC_027607"; transcript_id "TCONS_00173240"; exon_number "2"; gene_type "intronic_lncRNA";
2L	Cufflinks	exon	7163019	7163254	-	gene_id "XLOC_027736"; transcript_id "TCONS_00070378"; exon_number "1"; gene_type "lincRNA";
2L	Cufflinks	exon	7284729	7284935	-	gene_id "XLOC_027829"; transcript_id "TCONS_00048017"; exon_number "1"; gene_type "lincRNA";
2L	Cufflinks	exon	7311020	7311249	-	gene_id "XLOC_027869"; transcript_id "TCONS_00090094"; exon_number "1"; gene_type "intronic_lncRNA";
2L	Cufflinks	exon	7513065	7513285	-	gene_id "XLOC_028049"; transcript_id "TCONS_00090155"; exon_number "1"; gene_type "intronic_lncRNA";
2L	Cufflinks	exon	7513954	7514242	-	gene_id "XLOC_028051"; transcript_id "TCONS_00090156"; exon_number "1"; gene_type "intronic_lncRNA";
2L	Cufflinks	exon	7597298	7597521	-	gene_id "XLOC_028096"; transcript_id "TCONS_00048177"; exon_number "1"; gene_type "lincRNA";
2L	Cufflinks	exon	7668518	7668740	-	gene_id "XLOC_028192"; transcript_id "TCONS_00090230"; exon_number "1"; gene_type "anti-sense_lncRNA";
2L	Cufflinks	exon	7838539	7838806	-	gene_id "XLOC_028285"; transcript_id "TCONS_00048334"; exon_number "1"; gene_type "lincRNA";
2L	Cufflinks	exon	7955909	7956199	-	gene_id "XLOC_028369"; transcript_id "TCONS_00048381"; exon_number "1"; gene_type "intronic_lncRNA";
2L	Cufflinks	exon	8347408	8347613	-	gene_id "XLOC_028493"; transcript_id "TCONS_00070780"; exon_number "1"; gene_type "intronic_lncRNA";
2L	Cufflinks	exon	8610425	8610658	-	gene_id "XLOC_028635"; transcript_id "TCONS_00022887"; exon_number "1"; gene_type "intronic_lncRNA";
2L	Cufflinks	exon	8697988	8698480	-	gene_id "XLOC_028708"; transcript_id "TCONS_00070852"; exon_number "1"; gene_type "intronic_lncRNA";
2L	Cufflinks	exon	8910189	8910418	-	gene_id "XLOC_028952"; transcript_id "TCONS_00048703"; exon_number "1"; gene_type "intronic_lncRNA";
2L	Cufflinks	exon	8936578	8936623	-	gene_id "XLOC_028969"; transcript_id "TCONS_00070985"; exon_number "1"; gene_type "lincRNA";
2L	Cufflinks	exon	8936726	8936948	-	gene_id "XLOC_028969"; transcript_id "TCONS_00070985"; exon_number "2"; gene_type "lincRNA";
2L	Cufflinks	exon	9011258	9011498	-	gene_id "XLOC_029007"; transcript_id "TCONS_00023105"; exon_number "1"; gene_type "anti-sense_lncRNA";
2L	Cufflinks	exon	9194466	9194692	-	gene_id "XLOC_029256"; transcript_id "TCONS_00071102"; exon_number "1"; gene_type "intronic_lncRNA";
2L	Cufflinks	exon	9195623	9195843	-	gene_id "XLOC_029257"; transcript_id "TCONS_00023229"; exon_number "1"; gene_type "intronic_lncRNA";
2L	Cufflinks	exon	9202694	9202912	-	gene_id "XLOC_029264"; transcript_id "TCONS_00125494"; exon_number "1"; gene_type "intronic_lncRNA";
2L	Cufflinks	exon	9206273	9206480	-	gene_id "XLOC_029269"; transcript_id "TCONS_00090670"; exon_number "1"; gene_type "intronic_lncRNA";
2L	Cufflinks	exon	9263617	9263839	-	gene_id "XLOC_029306"; transcript_id "TCONS_00071115"; exon_number "1"; gene_type "intronic_lncRNA";
2L	Cufflinks	exon	9742085	9742311	-	gene_id "XLOC_029665"; transcript_id "TCONS_00049115"; exon_number "1"; gene_type "intronic_lncRNA";
2L	Cufflinks	exon	9777463	9777663	-	gene_id "XLOC_029699"; transcript_id "TCONS_00071335"; exon_number "1"; gene_type "lincRNA";
2L	Scripture	exon	9894067	9894132	-	gene_id "XLOC_029850"; transcript_id "TCONS_00180134"; exon_number "1"; gene_type "anti-sense_lncRNA";
2L	Scripture	exon	9894331	9894401	-	gene_id "XLOC_029850"; transcript_id "TCONS_00180134"; exon_number "2"; gene_type "anti-sense_lncRNA";
2L	Scripture	exon	9894576	9894725	-	gene_id "XLOC_029850"; transcript_id "TCONS_00180134"; exon_number "3"; gene_type "anti-sense_lncRNA";
2L	Scripture	exon	9894980	9895380	-	gene_id "XLOC_029850"; transcript_id "TCONS_00180134"; exon_number "4"; gene_type "anti-sense_lncRNA";
2L	Scripture	exon	9894067	9894401	-	gene_id "XLOC_029850"; transcript_id "TCONS_00180132"; exon_number "1"; gene_type "anti-sense_lncRNA";
2L	Scripture	exon	9894576	9894725	-	gene_id "XLOC_029850"; transcript_id "TCONS_00180132"; exon_number "2"; gene_type "anti-sense_lncRNA";
2L	Scripture	exon	9894980	9895380	-	gene_id "XLOC_029850"; transcript_id "TCONS_00180132"; exon_number "3"; gene_type "anti-sense_lncRNA";
2L	Cufflinks	exon	10041612	10041813	-	gene_id "XLOC_029951"; transcript_id "TCONS_00023695"; exon_number "1"; gene_type "lincRNA";
2L	Cufflinks	exon	10148583	10148785	-	gene_id "XLOC_030095"; transcript_id "TCONS_00023768"; exon_number "1"; gene_type "anti-sense_lncRNA";
2L	Cufflinks	exon	10480107	10480314	-	gene_id "XLOC_030222"; transcript_id "TCONS_00049508"; exon_number "1"; gene_type "intronic_lncRNA";
2L	Cufflinks	exon	10896353	10896573	-	gene_id "XLOC_030600"; transcript_id "TCONS_00024077"; exon_number "1"; gene_type "lincRNA";
2L	Scripture	exon	11272302	11272595	-	gene_id "XLOC_030868"; transcript_id "TCONS_00173925"; exon_number "1"; gene_type "anti-sense_lncRNA";
2L	Scripture	exon	11277346	11277375	-	gene_id "XLOC_030868"; transcript_id "TCONS_00173925"; exon_number "2"; gene_type "anti-sense_lncRNA";
2L	Cufflinks	exon	11329470	11329680	-	gene_id "XLOC_030946"; transcript_id "TCONS_00071927"; exon_number "1"; gene_type "lincRNA";
2L	Cufflinks	exon	11481372	11481573	-	gene_id "XLOC_031187"; transcript_id "TCONS_00024437"; exon_number "1"; gene_type "lincRNA";
2L	Cufflinks	exon	11552867	11553091	-	gene_id "XLOC_031248"; transcript_id "TCONS_00050135"; exon_number "1"; gene_type "lincRNA";
2L	Cufflinks	exon	11656122	11656324	-	gene_id "XLOC_031382"; transcript_id "TCONS_00050210"; exon_number "1"; gene_type "lincRNA";
2L	Cufflinks	exon	11682376	11682576	-	gene_id "XLOC_031429"; transcript_id "TCONS_00126476"; exon_number "1"; gene_type "lincRNA";
2L	Cufflinks	exon	11931891	11932091	-	gene_id "XLOC_031676"; transcript_id "TCONS_00072293"; exon_number "1"; gene_type "lincRNA";
2L	Cufflinks	exon	12211936	12212176	-	gene_id "XLOC_031908"; transcript_id "TCONS_00024909"; exon_number "1"; gene_type "intronic_lncRNA";
2L	Cufflinks	exon	12267118	12267256	-	gene_id "XLOC_032003"; transcript_id "TCONS_00072447"; exon_number "1"; gene_type "intronic_lncRNA";
2L	Cufflinks	exon	12270247	12270548	-	gene_id "XLOC_032003"; transcript_id "TCONS_00072447"; exon_number "2"; gene_type "intronic_lncRNA";
2L	Cufflinks	exon	12360739	12360960	-	gene_id "XLOC_032088"; transcript_id "TCONS_00091941"; exon_number "1"; gene_type "intronic_lncRNA";
2L	Cufflinks	exon	12527723	12527952	-	gene_id "XLOC_032178"; transcript_id "TCONS_00072501"; exon_number "1"; gene_type "intronic_lncRNA";
2L	Cufflinks	exon	12533900	12534179	-	gene_id "XLOC_032183"; transcript_id "TCONS_00025030"; exon_number "1"; gene_type "intronic_lncRNA";
2L	Cufflinks	exon	12835196	12835399	-	gene_id "XLOC_032520"; transcript_id "TCONS_00050882"; exon_number "1"; gene_type "lincRNA";
2L	Cufflinks	exon	12840429	12840643	-	gene_id "XLOC_032531"; transcript_id "TCONS_00050888"; exon_number "1"; gene_type "lincRNA";
2L	Cufflinks	exon	12847008	12847208	-	gene_id "XLOC_032544"; transcript_id "TCONS_00025208"; exon_number "1"; gene_type "lincRNA";
2L	Cufflinks	exon	12982364	12982576	-	gene_id "XLOC_032748"; transcript_id "TCONS_00072707"; exon_number "1"; gene_type "lincRNA";
2L	Cufflinks	exon	13056739	13056999	-	gene_id "XLOC_032785"; transcript_id "TCONS_00092172"; exon_number "1"; gene_type "intronic_lncRNA";
2L	Cufflinks	exon	13122942	13123009	-	gene_id "XLOC_032876"; transcript_id "TCONS_00051078"; exon_number "1"; gene_type "lincRNA";
2L	Cufflinks	exon	13129668	13129816	-	gene_id "XLOC_032876"; transcript_id "TCONS_00051078"; exon_number "2"; gene_type "lincRNA";
2L	Cufflinks	exon	13294166	13294399	-	gene_id "XLOC_032999"; transcript_id "TCONS_00092260"; exon_number "1"; gene_type "intronic_lncRNA";
2L	Scripture	exon	13399193	13399660	-	gene_id "XLOC_033083"; transcript_id "TCONS_00127122"; exon_number "1"; gene_type "anti-sense_lncRNA";
2L	Scripture	exon	13399764	13400146	-	gene_id "XLOC_033083"; transcript_id "TCONS_00127122"; exon_number "2"; gene_type "anti-sense_lncRNA";
2L	Cufflinks	exon	13756990	13757195	-	gene_id "XLOC_033348"; transcript_id "TCONS_00092421"; exon_number "1"; gene_type "intronic_lncRNA";
2L	Cufflinks	exon	14119229	14119439	-	gene_id "XLOC_033643"; transcript_id "TCONS_00073131"; exon_number "1"; gene_type "lincRNA";
2L	Cufflinks	exon	14158490	14158722	-	gene_id "XLOC_033697"; transcript_id "TCONS_00025861"; exon_number "1"; gene_type "anti-sense_lncRNA";
2L	Cufflinks	exon	14191834	14192040	-	gene_id "XLOC_033721"; transcript_id "TCONS_00092580"; exon_number "1"; gene_type "intronic_lncRNA";
2L	Cufflinks	exon	14475656	14475864	-	gene_id "XLOC_034019"; transcript_id "TCONS_00051750"; exon_number "1"; gene_type "lincRNA";
2L	Cufflinks	exon	14665682	14665911	-	gene_id "XLOC_034222"; transcript_id "TCONS_00051895"; exon_number "1"; gene_type "intronic_lncRNA";
2L	Cufflinks	exon	14708891	14709093	-	gene_id "XLOC_034292"; transcript_id "TCONS_00051927"; exon_number "1"; gene_type "lincRNA";
2L	Cufflinks	exon	14801731	14801935	-	gene_id "XLOC_034428"; transcript_id "TCONS_00052018"; exon_number "1"; gene_type "lincRNA";
2L	Cufflinks	exon	15013839	15014040	-	gene_id "XLOC_034692"; transcript_id "TCONS_00052180"; exon_number "1"; gene_type "lincRNA";
2L	Cufflinks	exon	15153279	15153492	-	gene_id "XLOC_034824"; transcript_id "TCONS_00093118"; exon_number "1"; gene_type "lincRNA";
2L	Cufflinks	exon	15323100	15323310	-	gene_id "XLOC_034999"; transcript_id "TCONS_00093215"; exon_number "1"; gene_type "lincRNA";
2L	Cufflinks	exon	15430018	15430245	-	gene_id "XLOC_035160"; transcript_id "TCONS_00052519"; exon_number "1"; gene_type "lincRNA";
2L	Cufflinks	exon	15465232	15465432	-	gene_id "XLOC_035202"; transcript_id "TCONS_00052549"; exon_number "1"; gene_type "lincRNA";
2L	Cufflinks	exon	15468653	15468870	-	gene_id "XLOC_035209"; transcript_id "TCONS_00073957"; exon_number "1"; gene_type "lincRNA";
2L	Cufflinks	exon	15531045	15531246	-	gene_id "XLOC_035307"; transcript_id "TCONS_00026826"; exon_number "1"; gene_type "lincRNA";
2L	Cufflinks	exon	15640665	15640870	-	gene_id "XLOC_035445"; transcript_id "TCONS_00146528"; exon_number "1"; gene_type "lincRNA";
2L	Cufflinks	exon	15810018	15810018	-	gene_id "XLOC_035510"; transcript_id "TCONS_00093415"; exon_number "1"; gene_type "lincRNA";
2L	Cufflinks	exon	15810075	15810286	-	gene_id "XLOC_035510"; transcript_id "TCONS_00093415"; exon_number "2"; gene_type "lincRNA";
2L	Cufflinks	exon	16055546	16055772	-	gene_id "XLOC_035828"; transcript_id "TCONS_00027118"; exon_number "1"; gene_type "intronic_lncRNA";
2L	Cufflinks	exon	16220471	16220673	-	gene_id "XLOC_036061"; transcript_id "TCONS_00053124"; exon_number "1"; gene_type "lincRNA";
2L	Cufflinks	exon	16490105	16490323	-	gene_id "XLOC_036282"; transcript_id "TCONS_00074464"; exon_number "1"; gene_type "anti-sense_lncRNA";
2L	Cufflinks	exon	16490386	16490542	-	gene_id "XLOC_036282"; transcript_id "TCONS_00074464"; exon_number "2"; gene_type "anti-sense_lncRNA";
2L	Cufflinks	exon	16490616	16490697	-	gene_id "XLOC_036282"; transcript_id "TCONS_00074464"; exon_number "3"; gene_type "anti-sense_lncRNA";
2L	Cufflinks	exon	16490796	16490992	-	gene_id "XLOC_036283"; transcript_id "TCONS_00027387"; exon_number "1"; gene_type "lincRNA";
2L	Cufflinks	exon	16491055	16491228	-	gene_id "XLOC_036283"; transcript_id "TCONS_00027387"; exon_number "2"; gene_type "lincRNA";
2L	Cufflinks	exon	16578856	16579057	-	gene_id "XLOC_036347"; transcript_id "TCONS_00027420"; exon_number "1"; gene_type "intronic_lncRNA";
2L	Scripture	exon	16719645	16720785	-	gene_id "XLOC_036462"; transcript_id "TCONS_00174328"; exon_number "1"; gene_type "anti-sense_lncRNA";
2L	Scripture	exon	16721107	16721196	-	gene_id "XLOC_036462"; transcript_id "TCONS_00174328"; exon_number "2"; gene_type "anti-sense_lncRNA";
2L	Scripture	exon	16719679	16720785	-	gene_id "XLOC_036462"; transcript_id "TCONS_00180760"; exon_number "1"; gene_type "anti-sense_lncRNA";
2L	Scripture	exon	16720988	16721198	-	gene_id "XLOC_036462"; transcript_id "TCONS_00180760"; exon_number "2"; gene_type "anti-sense_lncRNA";
2L	Cufflinks	exon	16856929	16857134	-	gene_id "XLOC_036533"; transcript_id "TCONS_00053410"; exon_number "1"; gene_type "intronic_lncRNA";
2L	Cufflinks	exon	16881861	16882081	-	gene_id "XLOC_036557"; transcript_id "TCONS_00093825"; exon_number "1"; gene_type "intronic_lncRNA";
2L	Cufflinks	exon	17085707	17085951	-	gene_id "XLOC_036845"; transcript_id "TCONS_00147064"; exon_number "1"; gene_type "lincRNA";
2L	Cufflinks	exon	17119155	17119377	-	gene_id "XLOC_036908"; transcript_id "TCONS_00053615"; exon_number "1"; gene_type "lincRNA";
2L	Cufflinks	exon	17170168	17170376	-	gene_id "XLOC_036968"; transcript_id "TCONS_00110025"; exon_number "1"; gene_type "anti-sense_lncRNA";
2L	Cufflinks	exon	17316823	17317047	-	gene_id "XLOC_037209"; transcript_id "TCONS_00053751"; exon_number "1"; gene_type "lincRNA";
2L	Cufflinks	exon	17574224	17574425	-	gene_id "XLOC_037392"; transcript_id "TCONS_00094083"; exon_number "1"; gene_type "lincRNA";
2L	Cufflinks	exon	17692372	17692587	-	gene_id "XLOC_037538"; transcript_id "TCONS_00028060"; exon_number "1"; gene_type "intronic_lncRNA";
2L	Cufflinks	exon	17951938	17951999	-	gene_id "XLOC_037870"; transcript_id "TCONS_00129268"; exon_number "1"; gene_type "lincRNA";
2L	Cufflinks	exon	17953414	17953561	-	gene_id "XLOC_037870"; transcript_id "TCONS_00129268"; exon_number "2"; gene_type "lincRNA";
2L	Cufflinks	exon	18075739	18075940	-	gene_id "XLOC_037996"; transcript_id "TCONS_00054312"; exon_number "1"; gene_type "lincRNA";
2L	Cufflinks	exon	18370786	18371002	-	gene_id "XLOC_038269"; transcript_id "TCONS_00110521"; exon_number "1"; gene_type "intronic_lncRNA";
2L	Cufflinks	exon	18397124	18397327	-	gene_id "XLOC_038291"; transcript_id "TCONS_00054513"; exon_number "1"; gene_type "lincRNA";
2L	Cufflinks	exon	18427460	18427668	-	gene_id "XLOC_038333"; transcript_id "TCONS_00054543"; exon_number "1"; gene_type "lincRNA";
2L	Cufflinks	exon	19576956	19577180	-	gene_id "XLOC_039180"; transcript_id "TCONS_00129944"; exon_number "1"; gene_type "intronic_lncRNA";
2L	Cufflinks	exon	19625097	19625317	-	gene_id "XLOC_039217"; transcript_id "TCONS_00029269"; exon_number "1"; gene_type "intronic_lncRNA";
2L	Cufflinks	exon	19684478	19684701	-	gene_id "XLOC_039248"; transcript_id "TCONS_00110919"; exon_number "1"; gene_type "intronic_lncRNA";
2L	Cufflinks	exon	19736984	19737455	-	gene_id "XLOC_039276"; transcript_id "TCONS_00029276"; exon_number "1"; gene_type "anti-sense_lncRNA";
2L	Cufflinks	exon	19832445	19832649	-	gene_id "XLOC_039345"; transcript_id "TCONS_00148225"; exon_number "1"; gene_type "intronic_lncRNA";
2L	Cufflinks	exon	19937719	19937927	-	gene_id "XLOC_039470"; transcript_id "TCONS_00095165"; exon_number "1"; gene_type "intronic_lncRNA";
2L	Cufflinks	exon	19982936	19983141	-	gene_id "XLOC_039498"; transcript_id "TCONS_00076066"; exon_number "1"; gene_type "intronic_lncRNA";
2L	Cufflinks	exon	20002336	20002545	-	gene_id "XLOC_039529"; transcript_id "TCONS_00076088"; exon_number "1"; gene_type "intronic_lncRNA";
2L	Cufflinks	exon	20243570	20243867	-	gene_id "XLOC_039656"; transcript_id "TCONS_00076165"; exon_number "1"; gene_type "lincRNA";
2L	Cufflinks	exon	20436206	20436407	-	gene_id "XLOC_039827"; transcript_id "TCONS_00076259"; exon_number "1"; gene_type "intronic_lncRNA";
2L	Cufflinks	exon	20477316	20477526	-	gene_id "XLOC_039855"; transcript_id "TCONS_00055549"; exon_number "1"; gene_type "lincRNA";
2L	Cufflinks	exon	20596435	20596665	-	gene_id "XLOC_040034"; transcript_id "TCONS_00095479"; exon_number "1"; gene_type "lincRNA";
2L	Cufflinks	exon	20625894	20626118	-	gene_id "XLOC_040081"; transcript_id "TCONS_00111268"; exon_number "1"; gene_type "lincRNA";
2L	Cufflinks	exon	20636299	20638070	-	gene_id "XLOC_040096"; transcript_id "TCONS_00076397"; exon_number "1"; gene_type "lincRNA";
2L	Cufflinks	exon	20638152	20638378	-	gene_id "XLOC_040096"; transcript_id "TCONS_00076397"; exon_number "2"; gene_type "lincRNA";
2L	Cufflinks	exon	21190496	21190705	-	gene_id "XLOC_040305"; transcript_id "TCONS_00029984"; exon_number "1"; gene_type "intronic_lncRNA";
2L	Cufflinks	exon	21323201	21323406	-	gene_id "XLOC_040357"; transcript_id "TCONS_00076577"; exon_number "1"; gene_type "lincRNA";
2L	Cufflinks	exon	21327588	21327791	-	gene_id "XLOC_040366"; transcript_id "TCONS_00030034"; exon_number "1"; gene_type "lincRNA";
2L	Cufflinks	exon	21398746	21401435	-	gene_id "XLOC_040413"; transcript_id "TCONS_00076601"; exon_number "1"; gene_type "lincRNA";
2L	Cufflinks	exon	21401488	21401533	-	gene_id "XLOC_040413"; transcript_id "TCONS_00076601"; exon_number "2"; gene_type "lincRNA";
2L	Cufflinks	exon	21683731	21683940	-	gene_id "XLOC_040496"; transcript_id "TCONS_00055998"; exon_number "1"; gene_type "lincRNA";
2L	Cufflinks	exon	21879710	21879918	-	gene_id "XLOC_040644"; transcript_id "TCONS_00030234"; exon_number "1"; gene_type "lincRNA";
2L	Cufflinks	exon	21900510	21900713	-	gene_id "XLOC_040676"; transcript_id "TCONS_00130720"; exon_number "1"; gene_type "lincRNA";
2L	Cufflinks	exon	22081228	22081443	-	gene_id "XLOC_040912"; transcript_id "TCONS_00111678"; exon_number "1"; gene_type "lincRNA";
2L	Cufflinks	exon	22239165	22239357	-	gene_id "XLOC_041079"; transcript_id "TCONS_00096033"; exon_number "1"; gene_type "lincRNA";
2L	Cufflinks	exon	22239427	22239437	-	gene_id "XLOC_041079"; transcript_id "TCONS_00096033"; exon_number "2"; gene_type "lincRNA";
2L	Cufflinks	exon	22543195	22544498	-	gene_id "XLOC_041081"; transcript_id "TCONS_00056464"; exon_number "1"; gene_type "lincRNA";
2L	Cufflinks	exon	22546344	22546757	-	gene_id "XLOC_041081"; transcript_id "TCONS_00056464"; exon_number "2"; gene_type "lincRNA";
2L	Cufflinks	exon	22543195	22544498	-	gene_id "XLOC_041081"; transcript_id "TCONS_00056463"; exon_number "1"; gene_type "lincRNA";
2L	Cufflinks	exon	22546070	22546210	-	gene_id "XLOC_041081"; transcript_id "TCONS_00056463"; exon_number "2"; gene_type "lincRNA";
2L	Cufflinks	exon	22546344	22546757	-	gene_id "XLOC_041081"; transcript_id "TCONS_00056463"; exon_number "3"; gene_type "lincRNA";
2L	Cufflinks	exon	22923846	22924055	-	gene_id "XLOC_041273"; transcript_id "TCONS_00111844"; exon_number "1"; gene_type "lincRNA";
2R	Cufflinks	exon	125561	125768	+	gene_id "XLOC_045560"; transcript_id "TCONS_00290493"; exon_number "1"; gene_type "lincRNA";
2R	Cufflinks	exon	460178	460385	+	gene_id "XLOC_045613"; transcript_id "TCONS_00204032"; exon_number "1"; gene_type "intronic_lncRNA";
2R	Cufflinks	exon	386583	386797	+	gene_id "XLOC_045634"; transcript_id "TCONS_00204010"; exon_number "1"; gene_type "lincRNA";
2R	Cufflinks	exon	900261	900469	+	gene_id "XLOC_045911"; transcript_id "TCONS_00228619"; exon_number "1"; gene_type "lincRNA";
2R	Scripture	exon	999434	1000181	+	gene_id "XLOC_046011"; transcript_id "TCONS_00204181"; exon_number "1"; gene_type "lincRNA";
2R	Scripture	exon	1000263	1000435	+	gene_id "XLOC_046011"; transcript_id "TCONS_00204181"; exon_number "2"; gene_type "lincRNA";
2R	Cufflinks	exon	1023155	1023386	+	gene_id "XLOC_046032"; transcript_id "TCONS_00252866"; exon_number "1"; gene_type "lincRNA";
2R	Cufflinks	exon	1359323	1359664	+	gene_id "XLOC_046208"; transcript_id "TCONS_00204311"; exon_number "1"; gene_type "intronic_lncRNA";
2R	Cufflinks	exon	1485414	1485622	+	gene_id "XLOC_046344"; transcript_id "TCONS_00306592"; exon_number "1"; gene_type "lincRNA";
2R	Cufflinks	exon	2145283	2145511	+	gene_id "XLOC_046673"; transcript_id "TCONS_00229030"; exon_number "1"; gene_type "intronic_lncRNA";
2R	Cufflinks	exon	2184868	2185074	+	gene_id "XLOC_046685"; transcript_id "TCONS_00253197"; exon_number "1"; gene_type "intronic_lncRNA";
2R	Cufflinks	exon	2255770	2255975	+	gene_id "XLOC_046721"; transcript_id "TCONS_00253209"; exon_number "1"; gene_type "intronic_lncRNA";
2R	Cufflinks	exon	2701919	2702141	+	gene_id "XLOC_046894"; transcript_id "TCONS_00204717"; exon_number "1"; gene_type "lincRNA";
2R	Cufflinks	exon	3129531	3129735	+	gene_id "XLOC_047118"; transcript_id "TCONS_00307035"; exon_number "1"; gene_type "intronic_lncRNA";
2R	Scripture	exon	4100018	4100551	+	gene_id "XLOC_047626"; transcript_id "TCONS_00361296"; exon_number "1"; gene_type "lincRNA";
2R	Cufflinks	exon	4160855	4161057	+	gene_id "XLOC_047651"; transcript_id "TCONS_00229678"; exon_number "1"; gene_type "lincRNA";
2R	Cufflinks	exon	4204285	4204500	+	gene_id "XLOC_047689"; transcript_id "TCONS_00273346"; exon_number "1"; gene_type "lincRNA";
2R	Cufflinks	exon	4272586	4273035	+	gene_id "XLOC_047731"; transcript_id "TCONS_00307364"; exon_number "1"; gene_type "lincRNA";
2R	Cufflinks	exon	4273097	4274016	+	gene_id "XLOC_047731"; transcript_id "TCONS_00307364"; exon_number "2"; gene_type "lincRNA";
2R	Cufflinks	exon	4272637	4273035	+	gene_id "XLOC_047731"; transcript_id "TCONS_00253752"; exon_number "1"; gene_type "lincRNA";
2R	Cufflinks	exon	4273094	4274111	+	gene_id "XLOC_047731"; transcript_id "TCONS_00253752"; exon_number "2"; gene_type "lincRNA";
2R	Cufflinks	exon	4871340	4871847	+	gene_id "XLOC_047973"; transcript_id "TCONS_00205546"; exon_number "1"; gene_type "lincRNA";
2R	Cufflinks	exon	4871936	4872012	+	gene_id "XLOC_047973"; transcript_id "TCONS_00205546"; exon_number "2"; gene_type "lincRNA";
2R	Cufflinks	exon	5008100	5008300	+	gene_id "XLOC_048112"; transcript_id "TCONS_00230141"; exon_number "1"; gene_type "intronic_lncRNA";
2R	Scripture	exon	5049278	5050976	+	gene_id "XLOC_048157"; transcript_id "TCONS_00393498"; exon_number "1"; gene_type "lincRNA";
2R	Scripture	exon	5051185	5051802	+	gene_id "XLOC_048157"; transcript_id "TCONS_00393498"; exon_number "2"; gene_type "lincRNA";
2R	Cufflinks	exon	5097836	5098074	+	gene_id "XLOC_048205"; transcript_id "TCONS_00254116"; exon_number "1"; gene_type "lincRNA";
2R	Cufflinks	exon	5136670	5136875	+	gene_id "XLOC_048228"; transcript_id "TCONS_00230245"; exon_number "1"; gene_type "lincRNA";
2R	Cufflinks	exon	5138683	5138743	+	gene_id "XLOC_048229"; transcript_id "TCONS_00230246"; exon_number "1"; gene_type "lincRNA";
2R	Cufflinks	exon	5138796	5139147	+	gene_id "XLOC_048229"; transcript_id "TCONS_00230246"; exon_number "2"; gene_type "lincRNA";
2R	Cufflinks	exon	5365580	5366737	+	gene_id "XLOC_048336"; transcript_id "TCONS_00205887"; exon_number "1"; gene_type "lincRNA";
2R	Cufflinks	exon	5366804	5367738	+	gene_id "XLOC_048336"; transcript_id "TCONS_00205887"; exon_number "2"; gene_type "lincRNA";
2R	Cufflinks	exon	5720461	5720677	+	gene_id "XLOC_048545"; transcript_id "TCONS_00308005"; exon_number "1"; gene_type "intronic_lncRNA";
2R	Cufflinks	exon	5835254	5835457	+	gene_id "XLOC_048653"; transcript_id "TCONS_00230587"; exon_number "1"; gene_type "intronic_lncRNA";
2R	Cufflinks	exon	6072782	6073004	+	gene_id "XLOC_048832"; transcript_id "TCONS_00274169"; exon_number "1"; gene_type "lincRNA";
2R	Cufflinks	exon	6110854	6111063	+	gene_id "XLOC_048848"; transcript_id "TCONS_00230771"; exon_number "1"; gene_type "intronic_lncRNA";
2R	Cufflinks	exon	6140312	6140549	+	gene_id "XLOC_048866"; transcript_id "TCONS_00230780"; exon_number "1"; gene_type "intronic_lncRNA";
2R	Cufflinks	exon	6142713	6142919	+	gene_id "XLOC_048868"; transcript_id "TCONS_00292221"; exon_number "1"; gene_type "intronic_lncRNA";
2R	Cufflinks	exon	6323817	6330291	+	gene_id "XLOC_048931"; transcript_id "TCONS_00206377"; exon_number "1"; gene_type "lincRNA";
2R	Cufflinks	exon	6338087	6342255	+	gene_id "XLOC_048931"; transcript_id "TCONS_00206377"; exon_number "2"; gene_type "lincRNA";
2R	Scripture	exon	6872938	6873265	+	gene_id "XLOC_049126"; transcript_id "TCONS_00372319"; exon_number "1"; gene_type "anti-sense_lncRNA";
2R	Scripture	exon	6875982	6876197	+	gene_id "XLOC_049126"; transcript_id "TCONS_00372319"; exon_number "2"; gene_type "anti-sense_lncRNA";
2R	Scripture	exon	6876273	6876431	+	gene_id "XLOC_049126"; transcript_id "TCONS_00372319"; exon_number "3"; gene_type "anti-sense_lncRNA";
2R	Cufflinks	exon	6926881	6927088	+	gene_id "XLOC_049172"; transcript_id "TCONS_00274499"; exon_number "1"; gene_type "intronic_lncRNA";
2R	Cufflinks	exon	6948706	6948923	+	gene_id "XLOC_049182"; transcript_id "TCONS_00231137"; exon_number "1"; gene_type "intronic_lncRNA";
2R	Cufflinks	exon	7333794	7333910	+	gene_id "XLOC_049403"; transcript_id "TCONS_00206996"; exon_number "1"; gene_type "intronic_lncRNA";
2R	Cufflinks	exon	7334401	7334513	+	gene_id "XLOC_049403"; transcript_id "TCONS_00206996"; exon_number "2"; gene_type "intronic_lncRNA";
2R	Cufflinks	exon	7599728	7599935	+	gene_id "XLOC_049537"; transcript_id "TCONS_00231483"; exon_number "1"; gene_type "intronic_lncRNA";
2R	Cufflinks	exon	7615368	7615571	+	gene_id "XLOC_049545"; transcript_id "TCONS_00292765"; exon_number "1"; gene_type "intronic_lncRNA";
2R	Cufflinks	exon	7861133	7861379	+	gene_id "XLOC_049617"; transcript_id "TCONS_00231527"; exon_number "1"; gene_type "intronic_lncRNA";
2R	Cufflinks	exon	8523686	8523891	+	gene_id "XLOC_050043"; transcript_id "TCONS_00275089"; exon_number "1"; gene_type "intronic_lncRNA";
2R	Cufflinks	exon	8562881	8563092	+	gene_id "XLOC_050100"; transcript_id "TCONS_00275120"; exon_number "1"; gene_type "lincRNA";
2R	Scripture	exon	9094936	9095339	+	gene_id "XLOC_050502"; transcript_id "TCONS_00362500"; exon_number "1"; gene_type "anti-sense_lncRNA";
2R	Scripture	exon	9095578	9095629	+	gene_id "XLOC_050502"; transcript_id "TCONS_00362500"; exon_number "2"; gene_type "anti-sense_lncRNA";
2R	Scripture	exon	9095898	9095958	+	gene_id "XLOC_050502"; transcript_id "TCONS_00362500"; exon_number "3"; gene_type "anti-sense_lncRNA";
2R	Scripture	exon	9096150	9096202	+	gene_id "XLOC_050502"; transcript_id "TCONS_00362500"; exon_number "4"; gene_type "anti-sense_lncRNA";
2R	Scripture	exon	9096383	9096438	+	gene_id "XLOC_050502"; transcript_id "TCONS_00362500"; exon_number "5"; gene_type "anti-sense_lncRNA";
2R	Scripture	exon	9096671	9096735	+	gene_id "XLOC_050502"; transcript_id "TCONS_00362500"; exon_number "6"; gene_type "anti-sense_lncRNA";
2R	Scripture	exon	9096926	9097045	+	gene_id "XLOC_050502"; transcript_id "TCONS_00362500"; exon_number "7"; gene_type "anti-sense_lncRNA";
2R	Scripture	exon	9095062	9095339	+	gene_id "XLOC_050502"; transcript_id "TCONS_00373238"; exon_number "1"; gene_type "lincRNA";
2R	Scripture	exon	9095578	9095629	+	gene_id "XLOC_050502"; transcript_id "TCONS_00373238"; exon_number "2"; gene_type "lincRNA";
2R	Scripture	exon	9095898	9095958	+	gene_id "XLOC_050502"; transcript_id "TCONS_00373238"; exon_number "3"; gene_type "lincRNA";
2R	Scripture	exon	9096150	9096202	+	gene_id "XLOC_050502"; transcript_id "TCONS_00373238"; exon_number "4"; gene_type "lincRNA";
2R	Scripture	exon	9096383	9096438	+	gene_id "XLOC_050502"; transcript_id "TCONS_00373238"; exon_number "5"; gene_type "lincRNA";
2R	Scripture	exon	9096671	9096905	+	gene_id "XLOC_050502"; transcript_id "TCONS_00373238"; exon_number "6"; gene_type "lincRNA";
2R	Scripture	exon	9095221	9095629	+	gene_id "XLOC_050502"; transcript_id "TCONS_00362502"; exon_number "1"; gene_type "anti-sense_lncRNA";
2R	Scripture	exon	9095898	9095958	+	gene_id "XLOC_050502"; transcript_id "TCONS_00362502"; exon_number "2"; gene_type "anti-sense_lncRNA";
2R	Scripture	exon	9096150	9096202	+	gene_id "XLOC_050502"; transcript_id "TCONS_00362502"; exon_number "3"; gene_type "anti-sense_lncRNA";
2R	Scripture	exon	9096383	9096438	+	gene_id "XLOC_050502"; transcript_id "TCONS_00362502"; exon_number "4"; gene_type "anti-sense_lncRNA";
2R	Scripture	exon	9096671	9096735	+	gene_id "XLOC_050502"; transcript_id "TCONS_00362502"; exon_number "5"; gene_type "anti-sense_lncRNA";
2R	Scripture	exon	9096926	9097044	+	gene_id "XLOC_050502"; transcript_id "TCONS_00362502"; exon_number "6"; gene_type "anti-sense_lncRNA";
2R	Scripture	exon	9095822	9095958	+	gene_id "XLOC_050502"; transcript_id "TCONS_00381778"; exon_number "1"; gene_type "anti-sense_lncRNA";
2R	Scripture	exon	9096150	9096202	+	gene_id "XLOC_050502"; transcript_id "TCONS_00381778"; exon_number "2"; gene_type "anti-sense_lncRNA";
2R	Scripture	exon	9096383	9096438	+	gene_id "XLOC_050502"; transcript_id "TCONS_00381778"; exon_number "3"; gene_type "anti-sense_lncRNA";
2R	Scripture	exon	9096671	9096735	+	gene_id "XLOC_050502"; transcript_id "TCONS_00381778"; exon_number "4"; gene_type "anti-sense_lncRNA";
2R	Scripture	exon	9096926	9097045	+	gene_id "XLOC_050502"; transcript_id "TCONS_00381778"; exon_number "5"; gene_type "anti-sense_lncRNA";
2R	Cufflinks	exon	9226664	9226892	+	gene_id "XLOC_050563"; transcript_id "TCONS_00275387"; exon_number "1"; gene_type "lincRNA";
2R	Scripture	exon	9284662	9285195	+	gene_id "XLOC_050593"; transcript_id "TCONS_00381851"; exon_number "1"; gene_type "anti-sense_lncRNA";
2R	Scripture	exon	9285424	9285538	+	gene_id "XLOC_050593"; transcript_id "TCONS_00381851"; exon_number "2"; gene_type "anti-sense_lncRNA";
2R	Cufflinks	exon	9332334	9332582	+	gene_id "XLOC_050615"; transcript_id "TCONS_00207928"; exon_number "1"; gene_type "intronic_lncRNA";
2R	Cufflinks	exon	9620482	9620693	+	gene_id "XLOC_050761"; transcript_id "TCONS_00232399"; exon_number "1"; gene_type "intronic_lncRNA";
2R	Cufflinks	exon	9927728	9927943	+	gene_id "XLOC_050966"; transcript_id "TCONS_00208187"; exon_number "1"; gene_type "intronic_lncRNA";
2R	Cufflinks	exon	9953450	9953649	+	gene_id "XLOC_050993"; transcript_id "TCONS_00256114"; exon_number "1"; gene_type "intronic_lncRNA";
2R	Scripture	exon	10031085	10031244	+	gene_id "XLOC_051040"; transcript_id "TCONS_00381930"; exon_number "1"; gene_type "anti-sense_lncRNA";
2R	Scripture	exon	10031306	10031446	+	gene_id "XLOC_051040"; transcript_id "TCONS_00381930"; exon_number "2"; gene_type "anti-sense_lncRNA";
2R	Cufflinks	exon	10202186	10202393	+	gene_id "XLOC_051111"; transcript_id "TCONS_00232605"; exon_number "1"; gene_type "lincRNA";
2R	Cufflinks	exon	10394703	10394909	+	gene_id "XLOC_051242"; transcript_id "TCONS_00309773"; exon_number "1"; gene_type "intronic_lncRNA";
2R	Scripture	exon	10473269	10474111	+	gene_id "XLOC_051268"; transcript_id "TCONS_00382069"; exon_number "1"; gene_type "anti-sense_lncRNA";
2R	Scripture	exon	10474172	10474791	+	gene_id "XLOC_051268"; transcript_id "TCONS_00382069"; exon_number "2"; gene_type "anti-sense_lncRNA";
2R	Scripture	exon	10478360	10478863	+	gene_id "XLOC_051270"; transcript_id "TCONS_00362900"; exon_number "1"; gene_type "anti-sense_lncRNA";
2R	Scripture	exon	10539300	10541773	+	gene_id "XLOC_051283"; transcript_id "TCONS_00362915"; exon_number "1"; gene_type "anti-sense_lncRNA";
2R	Scripture	exon	10541841	10543116	+	gene_id "XLOC_051283"; transcript_id "TCONS_00362915"; exon_number "2"; gene_type "anti-sense_lncRNA";
2R	Cufflinks	exon	10758642	10758882	+	gene_id "XLOC_051395"; transcript_id "TCONS_00208498"; exon_number "1"; gene_type "intronic_lncRNA";
2R	Cufflinks	exon	10767772	10767984	+	gene_id "XLOC_051403"; transcript_id "TCONS_00208502"; exon_number "1"; gene_type "intronic_lncRNA";
2R	Cufflinks	exon	10787818	10788026	+	gene_id "XLOC_051423"; transcript_id "TCONS_00232796"; exon_number "1"; gene_type "intronic_lncRNA";
2R	Cufflinks	exon	10861377	10861594	+	gene_id "XLOC_051480"; transcript_id "TCONS_00208533"; exon_number "1"; gene_type "intronic_lncRNA";
2R	Cufflinks	exon	10933293	10933493	+	gene_id "XLOC_051552"; transcript_id "TCONS_00328740"; exon_number "1"; gene_type "lincRNA";
2R	Cufflinks	exon	11045739	11045958	+	gene_id "XLOC_051653"; transcript_id "TCONS_00232904"; exon_number "1"; gene_type "intronic_lncRNA";
2R	Cufflinks	exon	12014938	12015091	+	gene_id "XLOC_052472"; transcript_id "TCONS_00233456"; exon_number "1"; gene_type "intronic_lncRNA";
2R	Cufflinks	exon	12015189	12015490	+	gene_id "XLOC_052472"; transcript_id "TCONS_00233456"; exon_number "2"; gene_type "intronic_lncRNA";
2R	Cufflinks	exon	12102971	12103312	+	gene_id "XLOC_052548"; transcript_id "TCONS_00233501"; exon_number "1"; gene_type "intronic_lncRNA";
2R	Cufflinks	exon	12103528	12103649	+	gene_id "XLOC_052548"; transcript_id "TCONS_00233501"; exon_number "2"; gene_type "intronic_lncRNA";
2R	Cufflinks	exon	12769077	12769295	+	gene_id "XLOC_052958"; transcript_id "TCONS_00209510"; exon_number "1"; gene_type "lincRNA";
2R	Scripture	exon	12875842	12876024	+	gene_id "XLOC_053065"; transcript_id "TCONS_00363419"; exon_number "1"; gene_type "anti-sense_lncRNA";
2R	Scripture	exon	12876082	12876207	+	gene_id "XLOC_053065"; transcript_id "TCONS_00363419"; exon_number "2"; gene_type "anti-sense_lncRNA";
2R	Cufflinks	exon	13432672	13432875	+	gene_id "XLOC_053564"; transcript_id "TCONS_00209864"; exon_number "1"; gene_type "intronic_lncRNA";
2R	Cufflinks	exon	13464307	13464509	+	gene_id "XLOC_053574"; transcript_id "TCONS_00209867"; exon_number "1"; gene_type "intronic_lncRNA";
2R	Cufflinks	exon	13475929	13476129	+	gene_id "XLOC_053580"; transcript_id "TCONS_00310893"; exon_number "1"; gene_type "intronic_lncRNA";
2R	Scripture	exon	13538198	13538353	+	gene_id "XLOC_053605"; transcript_id "TCONS_00363523"; exon_number "1"; gene_type "anti-sense_lncRNA";
2R	Scripture	exon	13549110	13549536	+	gene_id "XLOC_053605"; transcript_id "TCONS_00363523"; exon_number "2"; gene_type "anti-sense_lncRNA";
2R	Cufflinks	exon	13611093	13611309	+	gene_id "XLOC_053676"; transcript_id "TCONS_00276836"; exon_number "1"; gene_type "lincRNA";
2R	Cufflinks	exon	13638251	13638452	+	gene_id "XLOC_053722"; transcript_id "TCONS_00234237"; exon_number "1"; gene_type "intronic_lncRNA";
2R	Cufflinks	exon	13659450	13659654	+	gene_id "XLOC_053751"; transcript_id "TCONS_00209995"; exon_number "1"; gene_type "intronic_lncRNA";
2R	Cufflinks	exon	13692272	13692490	+	gene_id "XLOC_053793"; transcript_id "TCONS_00210033"; exon_number "1"; gene_type "anti-sense_lncRNA";
2R	Cufflinks	exon	13791417	13791637	+	gene_id "XLOC_053919"; transcript_id "TCONS_00234431"; exon_number "1"; gene_type "lincRNA";
2R	Cufflinks	exon	14129542	14129749	+	gene_id "XLOC_054082"; transcript_id "TCONS_00277065"; exon_number "1"; gene_type "intronic_lncRNA";
2R	Cufflinks	exon	14143126	14143329	+	gene_id "XLOC_054095"; transcript_id "TCONS_00234512"; exon_number "1"; gene_type "lincRNA";
2R	Cufflinks	exon	14265882	14266086	+	gene_id "XLOC_054141"; transcript_id "TCONS_00311167"; exon_number "1"; gene_type "intronic_lncRNA";
2R	Cufflinks	exon	14318767	14319014	+	gene_id "XLOC_054177"; transcript_id "TCONS_00210294"; exon_number "1"; gene_type "intronic_lncRNA";
2R	Cufflinks	exon	14337288	14337526	+	gene_id "XLOC_054195"; transcript_id "TCONS_00234583"; exon_number "1"; gene_type "intronic_lncRNA";
2R	Cufflinks	exon	14338176	14338420	+	gene_id "XLOC_054197"; transcript_id "TCONS_00210311"; exon_number "1"; gene_type "intronic_lncRNA";
2R	Cufflinks	exon	14339549	14339914	+	gene_id "XLOC_054199"; transcript_id "TCONS_00210313"; exon_number "1"; gene_type "intronic_lncRNA";
2R	Cufflinks	exon	14407966	14408176	+	gene_id "XLOC_054268"; transcript_id "TCONS_00210369"; exon_number "1"; gene_type "lincRNA";
2R	Cufflinks	exon	14419041	14419251	+	gene_id "XLOC_054275"; transcript_id "TCONS_00210379"; exon_number "1"; gene_type "lincRNA";
2R	Cufflinks	exon	14456832	14457040	+	gene_id "XLOC_054332"; transcript_id "TCONS_00330060"; exon_number "1"; gene_type "intronic_lncRNA";
2R	Scripture	exon	14621524	14621750	+	gene_id "XLOC_054386"; transcript_id "TCONS_00363918"; exon_number "1"; gene_type "lincRNA";
2R	Scripture	exon	14621960	14622176	+	gene_id "XLOC_054386"; transcript_id "TCONS_00363918"; exon_number "2"; gene_type "lincRNA";
2R	Scripture	exon	14622240	14622294	+	gene_id "XLOC_054386"; transcript_id "TCONS_00363918"; exon_number "3"; gene_type "lincRNA";
2R	Scripture	exon	14622478	14622531	+	gene_id "XLOC_054386"; transcript_id "TCONS_00363918"; exon_number "4"; gene_type "lincRNA";
2R	Scripture	exon	14622713	14622766	+	gene_id "XLOC_054386"; transcript_id "TCONS_00363918"; exon_number "5"; gene_type "lincRNA";
2R	Scripture	exon	14622945	14623004	+	gene_id "XLOC_054386"; transcript_id "TCONS_00363918"; exon_number "6"; gene_type "lincRNA";
2R	Scripture	exon	14623189	14623245	+	gene_id "XLOC_054386"; transcript_id "TCONS_00363918"; exon_number "7"; gene_type "lincRNA";
2R	Scripture	exon	14623417	14623469	+	gene_id "XLOC_054386"; transcript_id "TCONS_00363918"; exon_number "8"; gene_type "lincRNA";
2R	Scripture	exon	14623687	14623731	+	gene_id "XLOC_054386"; transcript_id "TCONS_00363918"; exon_number "9"; gene_type "lincRNA";
2R	Scripture	exon	14623920	14623978	+	gene_id "XLOC_054386"; transcript_id "TCONS_00363918"; exon_number "10"; gene_type "lincRNA";
2R	Scripture	exon	14624157	14624220	+	gene_id "XLOC_054386"; transcript_id "TCONS_00363918"; exon_number "11"; gene_type "lincRNA";
2R	Scripture	exon	14624403	14624617	+	gene_id "XLOC_054386"; transcript_id "TCONS_00363918"; exon_number "12"; gene_type "lincRNA";
2R	Scripture	exon	14621524	14621750	+	gene_id "XLOC_054386"; transcript_id "TCONS_00363920"; exon_number "1"; gene_type "lincRNA";
2R	Scripture	exon	14621812	14622020	+	gene_id "XLOC_054386"; transcript_id "TCONS_00363920"; exon_number "2"; gene_type "lincRNA";
2R	Scripture	exon	14622240	14622294	+	gene_id "XLOC_054386"; transcript_id "TCONS_00363920"; exon_number "3"; gene_type "lincRNA";
2R	Scripture	exon	14622478	14622531	+	gene_id "XLOC_054386"; transcript_id "TCONS_00363920"; exon_number "4"; gene_type "lincRNA";
2R	Scripture	exon	14622713	14622766	+	gene_id "XLOC_054386"; transcript_id "TCONS_00363920"; exon_number "5"; gene_type "lincRNA";
2R	Scripture	exon	14622945	14623004	+	gene_id "XLOC_054386"; transcript_id "TCONS_00363920"; exon_number "6"; gene_type "lincRNA";
2R	Scripture	exon	14623189	14623245	+	gene_id "XLOC_054386"; transcript_id "TCONS_00363920"; exon_number "7"; gene_type "lincRNA";
2R	Scripture	exon	14623417	14623469	+	gene_id "XLOC_054386"; transcript_id "TCONS_00363920"; exon_number "8"; gene_type "lincRNA";
2R	Scripture	exon	14623687	14623731	+	gene_id "XLOC_054386"; transcript_id "TCONS_00363920"; exon_number "9"; gene_type "lincRNA";
2R	Scripture	exon	14623920	14623978	+	gene_id "XLOC_054386"; transcript_id "TCONS_00363920"; exon_number "10"; gene_type "lincRNA";
2R	Scripture	exon	14624157	14624220	+	gene_id "XLOC_054386"; transcript_id "TCONS_00363920"; exon_number "11"; gene_type "lincRNA";
2R	Scripture	exon	14624403	14624617	+	gene_id "XLOC_054386"; transcript_id "TCONS_00363920"; exon_number "12"; gene_type "lincRNA";
2R	Scripture	exon	14621524	14621750	+	gene_id "XLOC_054386"; transcript_id "TCONS_00363915"; exon_number "1"; gene_type "lincRNA";
2R	Scripture	exon	14621960	14622020	+	gene_id "XLOC_054386"; transcript_id "TCONS_00363915"; exon_number "2"; gene_type "lincRNA";
2R	Scripture	exon	14622240	14622294	+	gene_id "XLOC_054386"; transcript_id "TCONS_00363915"; exon_number "3"; gene_type "lincRNA";
2R	Scripture	exon	14622713	14622766	+	gene_id "XLOC_054386"; transcript_id "TCONS_00363915"; exon_number "4"; gene_type "lincRNA";
2R	Scripture	exon	14622945	14623004	+	gene_id "XLOC_054386"; transcript_id "TCONS_00363915"; exon_number "5"; gene_type "lincRNA";
2R	Scripture	exon	14623189	14623245	+	gene_id "XLOC_054386"; transcript_id "TCONS_00363915"; exon_number "6"; gene_type "lincRNA";
2R	Scripture	exon	14623417	14623469	+	gene_id "XLOC_054386"; transcript_id "TCONS_00363915"; exon_number "7"; gene_type "lincRNA";
2R	Scripture	exon	14623687	14623731	+	gene_id "XLOC_054386"; transcript_id "TCONS_00363915"; exon_number "8"; gene_type "lincRNA";
2R	Scripture	exon	14623920	14623978	+	gene_id "XLOC_054386"; transcript_id "TCONS_00363915"; exon_number "9"; gene_type "lincRNA";
2R	Scripture	exon	14624157	14624220	+	gene_id "XLOC_054386"; transcript_id "TCONS_00363915"; exon_number "10"; gene_type "lincRNA";
2R	Scripture	exon	14624403	14624617	+	gene_id "XLOC_054386"; transcript_id "TCONS_00363915"; exon_number "11"; gene_type "lincRNA";
2R	Scripture	exon	14621524	14621750	+	gene_id "XLOC_054386"; transcript_id "TCONS_00277228"; exon_number "1"; gene_type "lincRNA";
2R	Scripture	exon	14621960	14622020	+	gene_id "XLOC_054386"; transcript_id "TCONS_00277228"; exon_number "2"; gene_type "lincRNA";
2R	Scripture	exon	14622240	14622294	+	gene_id "XLOC_054386"; transcript_id "TCONS_00277228"; exon_number "3"; gene_type "lincRNA";
2R	Scripture	exon	14622478	14622531	+	gene_id "XLOC_054386"; transcript_id "TCONS_00277228"; exon_number "4"; gene_type "lincRNA";
2R	Scripture	exon	14622713	14622766	+	gene_id "XLOC_054386"; transcript_id "TCONS_00277228"; exon_number "5"; gene_type "lincRNA";
2R	Scripture	exon	14622945	14623004	+	gene_id "XLOC_054386"; transcript_id "TCONS_00277228"; exon_number "6"; gene_type "lincRNA";
2R	Scripture	exon	14623189	14623245	+	gene_id "XLOC_054386"; transcript_id "TCONS_00277228"; exon_number "7"; gene_type "lincRNA";
2R	Scripture	exon	14623417	14623469	+	gene_id "XLOC_054386"; transcript_id "TCONS_00277228"; exon_number "8"; gene_type "lincRNA";
2R	Scripture	exon	14623687	14623731	+	gene_id "XLOC_054386"; transcript_id "TCONS_00277228"; exon_number "9"; gene_type "lincRNA";
2R	Scripture	exon	14623920	14623978	+	gene_id "XLOC_054386"; transcript_id "TCONS_00277228"; exon_number "10"; gene_type "lincRNA";
2R	Scripture	exon	14624157	14624220	+	gene_id "XLOC_054386"; transcript_id "TCONS_00277228"; exon_number "11"; gene_type "lincRNA";
2R	Scripture	exon	14624403	14624617	+	gene_id "XLOC_054386"; transcript_id "TCONS_00277228"; exon_number "12"; gene_type "lincRNA";
2R	Cufflinks	exon	14621578	14621750	+	gene_id "XLOC_054386"; transcript_id "TCONS_00234717"; exon_number "1"; gene_type "lincRNA";
2R	Cufflinks	exon	14621960	14622020	+	gene_id "XLOC_054386"; transcript_id "TCONS_00234717"; exon_number "2"; gene_type "lincRNA";
2R	Cufflinks	exon	14622240	14622294	+	gene_id "XLOC_054386"; transcript_id "TCONS_00234717"; exon_number "3"; gene_type "lincRNA";
2R	Cufflinks	exon	14622478	14622531	+	gene_id "XLOC_054386"; transcript_id "TCONS_00234717"; exon_number "4"; gene_type "lincRNA";
2R	Cufflinks	exon	14622713	14622766	+	gene_id "XLOC_054386"; transcript_id "TCONS_00234717"; exon_number "5"; gene_type "lincRNA";
2R	Cufflinks	exon	14622945	14623004	+	gene_id "XLOC_054386"; transcript_id "TCONS_00234717"; exon_number "6"; gene_type "lincRNA";
2R	Cufflinks	exon	14623189	14623245	+	gene_id "XLOC_054386"; transcript_id "TCONS_00234717"; exon_number "7"; gene_type "lincRNA";
2R	Cufflinks	exon	14623417	14623657	+	gene_id "XLOC_054386"; transcript_id "TCONS_00234717"; exon_number "8"; gene_type "lincRNA";
2R	Cufflinks	exon	14659476	14659682	+	gene_id "XLOC_054440"; transcript_id "TCONS_00311320"; exon_number "1"; gene_type "lincRNA";
2R	Cufflinks	exon	14779817	14780022	+	gene_id "XLOC_054561"; transcript_id "TCONS_00258025"; exon_number "1"; gene_type "intronic_lncRNA";
2R	Cufflinks	exon	14912441	14912645	+	gene_id "XLOC_054668"; transcript_id "TCONS_00210606"; exon_number "1"; gene_type "intronic_lncRNA";
2R	Cufflinks	exon	15232819	15233023	+	gene_id "XLOC_054932"; transcript_id "TCONS_00277442"; exon_number "1"; gene_type "intronic_lncRNA";
2R	Cufflinks	exon	15235393	15235600	+	gene_id "XLOC_054934"; transcript_id "TCONS_00210787"; exon_number "1"; gene_type "intronic_lncRNA";
2R	Cufflinks	exon	15372370	15372570	+	gene_id "XLOC_055018"; transcript_id "TCONS_00295122"; exon_number "1"; gene_type "lincRNA";
2R	Cufflinks	exon	15419562	15420310	+	gene_id "XLOC_055037"; transcript_id "TCONS_00295157"; exon_number "1"; gene_type "intronic_lncRNA";
2R	Cufflinks	exon	15701253	15701462	+	gene_id "XLOC_055307"; transcript_id "TCONS_00258442"; exon_number "1"; gene_type "anti-sense_lncRNA";
2R	Cufflinks	exon	15805931	15806143	+	gene_id "XLOC_055396"; transcript_id "TCONS_00330567"; exon_number "1"; gene_type "anti-sense_lncRNA";
2R	Cufflinks	exon	15889507	15889741	+	gene_id "XLOC_055459"; transcript_id "TCONS_00235410"; exon_number "1"; gene_type "intronic_lncRNA";
2R	Cufflinks	exon	16067882	16068085	+	gene_id "XLOC_055542"; transcript_id "TCONS_00211236"; exon_number "1"; gene_type "lincRNA";
2R	Cufflinks	exon	16352280	16352375	+	gene_id "XLOC_055665"; transcript_id "TCONS_00258655"; exon_number "1"; gene_type "lincRNA";
2R	Cufflinks	exon	16352464	16352578	+	gene_id "XLOC_055665"; transcript_id "TCONS_00258655"; exon_number "2"; gene_type "lincRNA";
2R	Cufflinks	exon	16356390	16356603	+	gene_id "XLOC_055673"; transcript_id "TCONS_00211340"; exon_number "1"; gene_type "lincRNA";
2R	Cufflinks	exon	16358633	16358843	+	gene_id "XLOC_055675"; transcript_id "TCONS_00235543"; exon_number "1"; gene_type "lincRNA";
2R	Cufflinks	exon	16509682	16509908	+	gene_id "XLOC_055866"; transcript_id "TCONS_00211467"; exon_number "1"; gene_type "intronic_lncRNA";
2R	Cufflinks	exon	16638842	16639043	+	gene_id "XLOC_055924"; transcript_id "TCONS_00258821"; exon_number "1"; gene_type "intronic_lncRNA";
2R	Cufflinks	exon	16707047	16707250	+	gene_id "XLOC_055956"; transcript_id "TCONS_00211553"; exon_number "1"; gene_type "intronic_lncRNA";
2R	Cufflinks	exon	16805676	16805756	+	gene_id "XLOC_056042"; transcript_id "TCONS_00295630"; exon_number "1"; gene_type "lincRNA";
2R	Cufflinks	exon	16807099	16807240	+	gene_id "XLOC_056042"; transcript_id "TCONS_00295630"; exon_number "2"; gene_type "lincRNA";
2R	Scripture	exon	16829100	16830805	+	gene_id "XLOC_056059"; transcript_id "TCONS_00364335"; exon_number "1"; gene_type "lincRNA";
2R	Scripture	exon	16831170	16831557	+	gene_id "XLOC_056059"; transcript_id "TCONS_00364335"; exon_number "2"; gene_type "lincRNA";
2R	Cufflinks	exon	16911457	16911661	+	gene_id "XLOC_056107"; transcript_id "TCONS_00235899"; exon_number "1"; gene_type "lincRNA";
2R	Cufflinks	exon	17140581	17140869	+	gene_id "XLOC_056155"; transcript_id "TCONS_00235964"; exon_number "1"; gene_type "anti-sense_lncRNA";
2R	Cufflinks	exon	17140927	17141488	+	gene_id "XLOC_056155"; transcript_id "TCONS_00235964"; exon_number "2"; gene_type "anti-sense_lncRNA";
2R	Scripture	exon	17145622	17145860	+	gene_id "XLOC_056155"; transcript_id "TCONS_00364439"; exon_number "1"; gene_type "lincRNA";
2R	Scripture	exon	17145915	17146645	+	gene_id "XLOC_056155"; transcript_id "TCONS_00364439"; exon_number "2"; gene_type "lincRNA";
2R	Cufflinks	exon	17338353	17338586	+	gene_id "XLOC_056494"; transcript_id "TCONS_00211931"; exon_number "1"; gene_type "intronic_lncRNA";
2R	Scripture	exon	17700420	17700433	+	gene_id "XLOC_056633"; transcript_id "TCONS_00389227"; exon_number "1"; gene_type "lincRNA";
2R	Scripture	exon	17700635	17700703	+	gene_id "XLOC_056633"; transcript_id "TCONS_00389227"; exon_number "2"; gene_type "lincRNA";
2R	Scripture	exon	17700901	17700942	+	gene_id "XLOC_056633"; transcript_id "TCONS_00389227"; exon_number "3"; gene_type "lincRNA";
2R	Scripture	exon	17701134	17701321	+	gene_id "XLOC_056633"; transcript_id "TCONS_00389227"; exon_number "4"; gene_type "lincRNA";
2R	Cufflinks	exon	17700439	17700703	+	gene_id "XLOC_056633"; transcript_id "TCONS_00212103"; exon_number "1"; gene_type "lincRNA";
2R	Cufflinks	exon	17700901	17700942	+	gene_id "XLOC_056633"; transcript_id "TCONS_00212103"; exon_number "2"; gene_type "lincRNA";
2R	Cufflinks	exon	17701134	17701334	+	gene_id "XLOC_056633"; transcript_id "TCONS_00212103"; exon_number "3"; gene_type "lincRNA";
2R	Cufflinks	exon	17700446	17700703	+	gene_id "XLOC_056633"; transcript_id "TCONS_00236246"; exon_number "1"; gene_type "lincRNA";
2R	Cufflinks	exon	17700901	17700942	+	gene_id "XLOC_056633"; transcript_id "TCONS_00236246"; exon_number "2"; gene_type "lincRNA";
2R	Cufflinks	exon	17701134	17701192	+	gene_id "XLOC_056633"; transcript_id "TCONS_00236246"; exon_number "3"; gene_type "lincRNA";
2R	Cufflinks	exon	17701369	17701543	+	gene_id "XLOC_056633"; transcript_id "TCONS_00236246"; exon_number "4"; gene_type "lincRNA";
2R	Scripture	exon	17698939	17699168	+	gene_id "XLOC_056713"; transcript_id "TCONS_00236245"; exon_number "1"; gene_type "lincRNA";
2R	Scripture	exon	17699351	17699449	+	gene_id "XLOC_056713"; transcript_id "TCONS_00236245"; exon_number "2"; gene_type "lincRNA";
2R	Scripture	exon	17699858	17699897	+	gene_id "XLOC_056713"; transcript_id "TCONS_00236245"; exon_number "3"; gene_type "lincRNA";
2R	Scripture	exon	17700081	17700148	+	gene_id "XLOC_056713"; transcript_id "TCONS_00236245"; exon_number "4"; gene_type "lincRNA";
2R	Scripture	exon	17698939	17699168	+	gene_id "XLOC_056713"; transcript_id "TCONS_00312582"; exon_number "1"; gene_type "lincRNA";
2R	Scripture	exon	17699351	17699449	+	gene_id "XLOC_056713"; transcript_id "TCONS_00312582"; exon_number "2"; gene_type "lincRNA";
2R	Scripture	exon	17699858	17699897	+	gene_id "XLOC_056713"; transcript_id "TCONS_00312582"; exon_number "3"; gene_type "lincRNA";
2R	Scripture	exon	17700085	17700148	+	gene_id "XLOC_056713"; transcript_id "TCONS_00312582"; exon_number "4"; gene_type "lincRNA";
2R	Scripture	exon	17698939	17699286	+	gene_id "XLOC_056713"; transcript_id "TCONS_00374735"; exon_number "1"; gene_type "lincRNA";
2R	Scripture	exon	17699351	17699449	+	gene_id "XLOC_056713"; transcript_id "TCONS_00374735"; exon_number "2"; gene_type "lincRNA";
2R	Scripture	exon	17699858	17699897	+	gene_id "XLOC_056713"; transcript_id "TCONS_00374735"; exon_number "3"; gene_type "lincRNA";
2R	Scripture	exon	17700085	17700148	+	gene_id "XLOC_056713"; transcript_id "TCONS_00374735"; exon_number "4"; gene_type "lincRNA";
2R	Scripture	exon	17698939	17699286	+	gene_id "XLOC_056713"; transcript_id "TCONS_00374736"; exon_number "1"; gene_type "lincRNA";
2R	Scripture	exon	17699351	17699449	+	gene_id "XLOC_056713"; transcript_id "TCONS_00374736"; exon_number "2"; gene_type "lincRNA";
2R	Scripture	exon	17699858	17699897	+	gene_id "XLOC_056713"; transcript_id "TCONS_00374736"; exon_number "3"; gene_type "lincRNA";
2R	Scripture	exon	17700081	17700148	+	gene_id "XLOC_056713"; transcript_id "TCONS_00374736"; exon_number "4"; gene_type "lincRNA";
2R	Scripture	exon	17698939	17699286	+	gene_id "XLOC_056713"; transcript_id "TCONS_00374733"; exon_number "1"; gene_type "lincRNA";
2R	Scripture	exon	17699351	17699444	+	gene_id "XLOC_056713"; transcript_id "TCONS_00374733"; exon_number "2"; gene_type "lincRNA";
2R	Scripture	exon	17699858	17699897	+	gene_id "XLOC_056713"; transcript_id "TCONS_00374733"; exon_number "3"; gene_type "lincRNA";
2R	Scripture	exon	17700081	17700148	+	gene_id "XLOC_056713"; transcript_id "TCONS_00374733"; exon_number "4"; gene_type "lincRNA";
2R	Scripture	exon	17698939	17699168	+	gene_id "XLOC_056713"; transcript_id "TCONS_00236244"; exon_number "1"; gene_type "lincRNA";
2R	Scripture	exon	17699351	17699444	+	gene_id "XLOC_056713"; transcript_id "TCONS_00236244"; exon_number "2"; gene_type "lincRNA";
2R	Scripture	exon	17699858	17699897	+	gene_id "XLOC_056713"; transcript_id "TCONS_00236244"; exon_number "3"; gene_type "lincRNA";
2R	Scripture	exon	17700081	17700148	+	gene_id "XLOC_056713"; transcript_id "TCONS_00236244"; exon_number "4"; gene_type "lincRNA";
2R	Scripture	exon	17698953	17699168	+	gene_id "XLOC_056713"; transcript_id "TCONS_00389221"; exon_number "1"; gene_type "lincRNA";
2R	Scripture	exon	17699351	17699897	+	gene_id "XLOC_056713"; transcript_id "TCONS_00389221"; exon_number "2"; gene_type "lincRNA";
2R	Scripture	exon	17700081	17700143	+	gene_id "XLOC_056713"; transcript_id "TCONS_00389221"; exon_number "3"; gene_type "lincRNA";
2R	Scripture	exon	17698953	17699168	+	gene_id "XLOC_056713"; transcript_id "TCONS_00389220"; exon_number "1"; gene_type "lincRNA";
2R	Scripture	exon	17699351	17699897	+	gene_id "XLOC_056713"; transcript_id "TCONS_00389220"; exon_number "2"; gene_type "lincRNA";
2R	Scripture	exon	17700085	17700143	+	gene_id "XLOC_056713"; transcript_id "TCONS_00389220"; exon_number "3"; gene_type "lincRNA";
2R	Scripture	exon	17698953	17699168	+	gene_id "XLOC_056713"; transcript_id "TCONS_00212102"; exon_number "1"; gene_type "lincRNA";
2R	Scripture	exon	17699351	17699449	+	gene_id "XLOC_056713"; transcript_id "TCONS_00212102"; exon_number "2"; gene_type "lincRNA";
2R	Scripture	exon	17699858	17700143	+	gene_id "XLOC_056713"; transcript_id "TCONS_00212102"; exon_number "3"; gene_type "lincRNA";
2R	Scripture	exon	17701636	17701649	+	gene_id "XLOC_056714"; transcript_id "TCONS_00348878"; exon_number "1"; gene_type "anti-sense_lncRNA";
2R	Scripture	exon	17701834	17701894	+	gene_id "XLOC_056714"; transcript_id "TCONS_00348878"; exon_number "2"; gene_type "anti-sense_lncRNA";
2R	Scripture	exon	17702075	17702125	+	gene_id "XLOC_056714"; transcript_id "TCONS_00348878"; exon_number "3"; gene_type "anti-sense_lncRNA";
2R	Scripture	exon	17702315	17702369	+	gene_id "XLOC_056714"; transcript_id "TCONS_00348878"; exon_number "4"; gene_type "anti-sense_lncRNA";
2R	Scripture	exon	17702547	17702598	+	gene_id "XLOC_056714"; transcript_id "TCONS_00348878"; exon_number "5"; gene_type "anti-sense_lncRNA";
2R	Scripture	exon	17702779	17702841	+	gene_id "XLOC_056714"; transcript_id "TCONS_00348878"; exon_number "6"; gene_type "anti-sense_lncRNA";
2R	Scripture	exon	17703021	17703064	+	gene_id "XLOC_056714"; transcript_id "TCONS_00348878"; exon_number "7"; gene_type "anti-sense_lncRNA";
2R	Scripture	exon	17703244	17705190	+	gene_id "XLOC_056714"; transcript_id "TCONS_00348878"; exon_number "8"; gene_type "anti-sense_lncRNA";
2R	Cufflinks	exon	17709237	17709450	+	gene_id "XLOC_056716"; transcript_id "TCONS_00236248"; exon_number "1"; gene_type "intronic_lncRNA";
2R	Scripture	exon	17868956	17870490	+	gene_id "XLOC_056809"; transcript_id "TCONS_00364548"; exon_number "1"; gene_type "anti-sense_lncRNA";
2R	Scripture	exon	17871794	17872027	+	gene_id "XLOC_056809"; transcript_id "TCONS_00364548"; exon_number "2"; gene_type "anti-sense_lncRNA";
2R	Cufflinks	exon	17936888	17937088	+	gene_id "XLOC_056884"; transcript_id "TCONS_00236376"; exon_number "1"; gene_type "lincRNA";
2R	Cufflinks	exon	17944021	17944221	+	gene_id "XLOC_056895"; transcript_id "TCONS_00212265"; exon_number "1"; gene_type "lincRNA";
2R	Cufflinks	exon	18499651	18499855	+	gene_id "XLOC_057410"; transcript_id "TCONS_00278699"; exon_number "1"; gene_type "lincRNA";
2R	Cufflinks	exon	18526554	18526904	+	gene_id "XLOC_057432"; transcript_id "TCONS_00212576"; exon_number "1"; gene_type "lincRNA";
2R	Cufflinks	exon	18527044	18527089	+	gene_id "XLOC_057432"; transcript_id "TCONS_00212576"; exon_number "2"; gene_type "lincRNA";
2R	Cufflinks	exon	18889717	18889918	+	gene_id "XLOC_057649"; transcript_id "TCONS_00212738"; exon_number "1"; gene_type "intronic_lncRNA";
2R	Cufflinks	exon	18917314	18917556	+	gene_id "XLOC_057682"; transcript_id "TCONS_00212768"; exon_number "1"; gene_type "intronic_lncRNA";
2R	Cufflinks	exon	19042416	19042658	+	gene_id "XLOC_057806"; transcript_id "TCONS_00313148"; exon_number "1"; gene_type "lincRNA";
2R	Cufflinks	exon	19094174	19094386	+	gene_id "XLOC_057847"; transcript_id "TCONS_00212932"; exon_number "1"; gene_type "anti-sense_lncRNA";
2R	Cufflinks	exon	19087615	19087817	+	gene_id "XLOC_057880"; transcript_id "TCONS_00259807"; exon_number "1"; gene_type "intronic_lncRNA";
2R	Cufflinks	exon	19550743	19550980	+	gene_id "XLOC_058108"; transcript_id "TCONS_00259962"; exon_number "1"; gene_type "intronic_lncRNA";
2R	Cufflinks	exon	19810354	19810555	+	gene_id "XLOC_058346"; transcript_id "TCONS_00213248"; exon_number "1"; gene_type "lincRNA";
2R	Cufflinks	exon	19821398	19821616	+	gene_id "XLOC_058358"; transcript_id "TCONS_00213262"; exon_number "1"; gene_type "lincRNA";
2R	Cufflinks	exon	19922371	19922570	+	gene_id "XLOC_058488"; transcript_id "TCONS_00213354"; exon_number "1"; gene_type "lincRNA";
2R	Cufflinks	exon	20184724	20184928	+	gene_id "XLOC_058859"; transcript_id "TCONS_00213589"; exon_number "1"; gene_type "lincRNA";
2R	Cufflinks	exon	20202140	20202346	+	gene_id "XLOC_058885"; transcript_id "TCONS_00260370"; exon_number "1"; gene_type "lincRNA";
2R	Cufflinks	exon	20302483	20302575	+	gene_id "XLOC_058981"; transcript_id "TCONS_00237819"; exon_number "1"; gene_type "lincRNA";
2R	Cufflinks	exon	20302632	20303583	+	gene_id "XLOC_058981"; transcript_id "TCONS_00237819"; exon_number "2"; gene_type "lincRNA";
2R	Cufflinks	exon	20389870	20390076	+	gene_id "XLOC_059066"; transcript_id "TCONS_00213712"; exon_number "1"; gene_type "lincRNA";
2R	Cufflinks	exon	20438629	20438842	+	gene_id "XLOC_059143"; transcript_id "TCONS_00237951"; exon_number "1"; gene_type "intronic_lncRNA";
2R	Cufflinks	exon	20497776	20497978	+	gene_id "XLOC_059217"; transcript_id "TCONS_00213833"; exon_number "1"; gene_type "lincRNA";
2R	Cufflinks	exon	20518471	20518675	+	gene_id "XLOC_059225"; transcript_id "TCONS_00213855"; exon_number "1"; gene_type "lincRNA";
2R	Cufflinks	exon	20531694	20532061	+	gene_id "XLOC_059259"; transcript_id "TCONS_00260588"; exon_number "1"; gene_type "lincRNA";
2R	Cufflinks	exon	20532525	20533004	+	gene_id "XLOC_059259"; transcript_id "TCONS_00260588"; exon_number "2"; gene_type "lincRNA";
2R	Cufflinks	exon	20656906	20657120	+	gene_id "XLOC_059335"; transcript_id "TCONS_00213917"; exon_number "1"; gene_type "intronic_lncRNA";
2R	Cufflinks	exon	20680686	20680904	+	gene_id "XLOC_059354"; transcript_id "TCONS_00297148"; exon_number "1"; gene_type "lincRNA";
2R	Cufflinks	exon	20892308	20892518	+	gene_id "XLOC_059587"; transcript_id "TCONS_00238283"; exon_number "1"; gene_type "intronic_lncRNA";
2R	Cufflinks	exon	21663164	21663360	+	gene_id "XLOC_060157"; transcript_id "TCONS_00214497"; exon_number "1"; gene_type "lincRNA";
2R	Cufflinks	exon	21663425	21663921	+	gene_id "XLOC_060157"; transcript_id "TCONS_00214497"; exon_number "2"; gene_type "lincRNA";
2R	Cufflinks	exon	21675570	21675780	+	gene_id "XLOC_060162"; transcript_id "TCONS_00238670"; exon_number "1"; gene_type "intronic_lncRNA";
2R	Cufflinks	exon	21750190	21750391	+	gene_id "XLOC_060211"; transcript_id "TCONS_00280192"; exon_number "1"; gene_type "lincRNA";
2R	Cufflinks	exon	21856708	21856913	+	gene_id "XLOC_060348"; transcript_id "TCONS_00214608"; exon_number "1"; gene_type "lincRNA";
2R	Cufflinks	exon	22522456	22522657	+	gene_id "XLOC_060935"; transcript_id "TCONS_00215007"; exon_number "1"; gene_type "intronic_lncRNA";
2R	Cufflinks	exon	22557413	22557622	+	gene_id "XLOC_060962"; transcript_id "TCONS_00261530"; exon_number "1"; gene_type "intronic_lncRNA";
2R	Cufflinks	exon	22623597	22623807	+	gene_id "XLOC_061001"; transcript_id "TCONS_00239259"; exon_number "1"; gene_type "intronic_lncRNA";
2R	Scripture	exon	22643343	22643416	+	gene_id "XLOC_061011"; transcript_id "TCONS_00383572"; exon_number "1"; gene_type "anti-sense_lncRNA";
2R	Scripture	exon	22643479	22643653	+	gene_id "XLOC_061011"; transcript_id "TCONS_00383572"; exon_number "2"; gene_type "anti-sense_lncRNA";
2R	Cufflinks	exon	22904836	22905058	+	gene_id "XLOC_061197"; transcript_id "TCONS_00239411"; exon_number "1"; gene_type "intronic_lncRNA";
2R	Scripture	exon	22982327	22982879	+	gene_id "XLOC_061262"; transcript_id "TCONS_00261713"; exon_number "1"; gene_type "anti-sense_lncRNA";
2R	Scripture	exon	22982988	22983232	+	gene_id "XLOC_061262"; transcript_id "TCONS_00261713"; exon_number "2"; gene_type "anti-sense_lncRNA";
2R	Scripture	exon	22983329	22984255	+	gene_id "XLOC_061262"; transcript_id "TCONS_00261713"; exon_number "3"; gene_type "anti-sense_lncRNA";
2R	Scripture	exon	22982348	22982879	+	gene_id "XLOC_061262"; transcript_id "TCONS_00390042"; exon_number "1"; gene_type "anti-sense_lncRNA";
2R	Scripture	exon	22982988	22983227	+	gene_id "XLOC_061262"; transcript_id "TCONS_00390042"; exon_number "2"; gene_type "anti-sense_lncRNA";
2R	Scripture	exon	22983324	22984287	+	gene_id "XLOC_061262"; transcript_id "TCONS_00390042"; exon_number "3"; gene_type "anti-sense_lncRNA";
2R	Cufflinks	exon	23016442	23016668	+	gene_id "XLOC_061314"; transcript_id "TCONS_00280774"; exon_number "1"; gene_type "anti-sense_lncRNA";
2R	Cufflinks	exon	23112494	23112721	+	gene_id "XLOC_061439"; transcript_id "TCONS_00280833"; exon_number "1"; gene_type "lincRNA";
2R	Cufflinks	exon	23291840	23292043	+	gene_id "XLOC_061699"; transcript_id "TCONS_00239717"; exon_number "1"; gene_type "lincRNA";
2R	Cufflinks	exon	23629786	23629988	+	gene_id "XLOC_062003"; transcript_id "TCONS_00281105"; exon_number "1"; gene_type "lincRNA";
2R	Scripture	exon	23905605	23905760	+	gene_id "XLOC_062152"; transcript_id "TCONS_00365855"; exon_number "1"; gene_type "anti-sense_lncRNA";
2R	Scripture	exon	23905819	23905996	+	gene_id "XLOC_062152"; transcript_id "TCONS_00365855"; exon_number "2"; gene_type "anti-sense_lncRNA";
2R	Cufflinks	exon	24322838	24323043	+	gene_id "XLOC_062373"; transcript_id "TCONS_00315557"; exon_number "1"; gene_type "lincRNA";
2R	Cufflinks	exon	24643771	24643972	+	gene_id "XLOC_062581"; transcript_id "TCONS_00216230"; exon_number "1"; gene_type "lincRNA";
2R	Cufflinks	exon	24688776	24689000	+	gene_id "XLOC_062609"; transcript_id "TCONS_00262486"; exon_number "1"; gene_type "lincRNA";
2R	Cufflinks	exon	24691149	24691357	+	gene_id "XLOC_062613"; transcript_id "TCONS_00240429"; exon_number "1"; gene_type "lincRNA";
2R	Cufflinks	exon	25244356	25244564	+	gene_id "XLOC_063048"; transcript_id "TCONS_00298734"; exon_number "1"; gene_type "intronic_lncRNA";
2R	Cufflinks	exon	25248152	25248360	+	gene_id "XLOC_063052"; transcript_id "TCONS_00240747"; exon_number "1"; gene_type "intronic_lncRNA";
2R	Cufflinks	exon	25268988	25269131	+	gene_id "XLOC_063063"; transcript_id "TCONS_00262727"; exon_number "1"; gene_type "lincRNA";
2R	Cufflinks	exon	25269226	25270064	+	gene_id "XLOC_063063"; transcript_id "TCONS_00262727"; exon_number "2"; gene_type "lincRNA";
2R	Cufflinks	exon	693092	693298	-	gene_id "XLOC_063439"; transcript_id "TCONS_00334401"; exon_number "1"; gene_type "intronic_lncRNA";
2R	Cufflinks	exon	1263440	1263642	-	gene_id "XLOC_063780"; transcript_id "TCONS_00263004"; exon_number "1"; gene_type "lincRNA";
2R	Cufflinks	exon	1368942	1369083	-	gene_id "XLOC_063814"; transcript_id "TCONS_00263069"; exon_number "1"; gene_type "intronic_lncRNA";
2R	Cufflinks	exon	1369151	1369205	-	gene_id "XLOC_063814"; transcript_id "TCONS_00263069"; exon_number "2"; gene_type "intronic_lncRNA";
2R	Cufflinks	exon	1369385	1369569	-	gene_id "XLOC_063814"; transcript_id "TCONS_00263069"; exon_number "3"; gene_type "intronic_lncRNA";
2R	Cufflinks	exon	3342061	3342270	-	gene_id "XLOC_064852"; transcript_id "TCONS_00241679"; exon_number "1"; gene_type "lincRNA";
2R	Cufflinks	exon	3344654	3344854	-	gene_id "XLOC_064854"; transcript_id "TCONS_00299324"; exon_number "1"; gene_type "lincRNA";
2R	Cufflinks	exon	3352841	3353060	-	gene_id "XLOC_064863"; transcript_id "TCONS_00241695"; exon_number "1"; gene_type "lincRNA";
2R	Cufflinks	exon	4004758	4004966	-	gene_id "XLOC_065108"; transcript_id "TCONS_00299484"; exon_number "1"; gene_type "lincRNA";
2R	Cufflinks	exon	4675932	4675964	-	gene_id "XLOC_065402"; transcript_id "TCONS_00217785"; exon_number "1"; gene_type "lincRNA";
2R	Cufflinks	exon	4676018	4676187	-	gene_id "XLOC_065402"; transcript_id "TCONS_00217785"; exon_number "2"; gene_type "lincRNA";
2R	Cufflinks	exon	4677124	4677840	-	gene_id "XLOC_065402"; transcript_id "TCONS_00242137"; exon_number "1"; gene_type "lincRNA";
2R	Scripture	exon	4782738	4783049	-	gene_id "XLOC_065442"; transcript_id "TCONS_00384195"; exon_number "1"; gene_type "lincRNA";
2R	Scripture	exon	4783108	4783286	-	gene_id "XLOC_065442"; transcript_id "TCONS_00384195"; exon_number "2"; gene_type "lincRNA";
2R	Cufflinks	exon	4860007	4860247	-	gene_id "XLOC_065483"; transcript_id "TCONS_00317146"; exon_number "1"; gene_type "lincRNA";
2R	Scripture	exon	5257850	5258483	-	gene_id "XLOC_065797"; transcript_id "TCONS_00366730"; exon_number "1"; gene_type "anti-sense_lncRNA";
2R	Scripture	exon	5259769	5259819	-	gene_id "XLOC_065797"; transcript_id "TCONS_00366730"; exon_number "2"; gene_type "anti-sense_lncRNA";
2R	Cufflinks	exon	5466100	5466364	-	gene_id "XLOC_065917"; transcript_id "TCONS_00218199"; exon_number "1"; gene_type "lincRNA";
2R	Cufflinks	exon	5466423	5466477	-	gene_id "XLOC_065917"; transcript_id "TCONS_00218199"; exon_number "2"; gene_type "lincRNA";
2R	Cufflinks	exon	5967463	5967559	-	gene_id "XLOC_066349"; transcript_id "TCONS_00218438"; exon_number "1"; gene_type "lincRNA";
2R	Cufflinks	exon	5967679	5967984	-	gene_id "XLOC_066349"; transcript_id "TCONS_00218438"; exon_number "2"; gene_type "lincRNA";
2R	Cufflinks	exon	6164586	6164834	-	gene_id "XLOC_066405"; transcript_id "TCONS_00264388"; exon_number "1"; gene_type "intronic_lncRNA";
2R	Cufflinks	exon	6200322	6200523	-	gene_id "XLOC_066439"; transcript_id "TCONS_00218523"; exon_number "1"; gene_type "lincRNA";
2R	Cufflinks	exon	6500659	6501595	-	gene_id "XLOC_066509"; transcript_id "TCONS_00242858"; exon_number "1"; gene_type "lincRNA";
2R	Cufflinks	exon	6501673	6501707	-	gene_id "XLOC_066509"; transcript_id "TCONS_00242858"; exon_number "2"; gene_type "lincRNA";
2R	Cufflinks	exon	6562934	6563136	-	gene_id "XLOC_066572"; transcript_id "TCONS_00317725"; exon_number "1"; gene_type "intronic_lncRNA";
2R	Cufflinks	exon	6612103	6612179	-	gene_id "XLOC_066627"; transcript_id "TCONS_00218638"; exon_number "1"; gene_type "intronic_lncRNA";
2R	Cufflinks	exon	6612253	6612457	-	gene_id "XLOC_066627"; transcript_id "TCONS_00218638"; exon_number "2"; gene_type "intronic_lncRNA";
2R	Cufflinks	exon	6714518	6714857	-	gene_id "XLOC_066648"; transcript_id "TCONS_00242937"; exon_number "1"; gene_type "intronic_lncRNA";
2R	Cufflinks	exon	6821909	6822115	-	gene_id "XLOC_066696"; transcript_id "TCONS_00218720"; exon_number "1"; gene_type "lincRNA";
2R	Cufflinks	exon	6822243	6822763	-	gene_id "XLOC_066696"; transcript_id "TCONS_00218720"; exon_number "2"; gene_type "lincRNA";
2R	Cufflinks	exon	6891311	6891514	-	gene_id "XLOC_066746"; transcript_id "TCONS_00218763"; exon_number "1"; gene_type "lincRNA";
2R	Cufflinks	exon	7584366	7584632	-	gene_id "XLOC_067206"; transcript_id "TCONS_00300558"; exon_number "1"; gene_type "intronic_lncRNA";
2R	Cufflinks	exon	8330149	8330391	-	gene_id "XLOC_067583"; transcript_id "TCONS_00265105"; exon_number "1"; gene_type "intronic_lncRNA";
2R	Cufflinks	exon	8437578	8437798	-	gene_id "XLOC_067699"; transcript_id "TCONS_00219412"; exon_number "1"; gene_type "anti-sense_lncRNA";
2R	Cufflinks	exon	8563251	8563445	-	gene_id "XLOC_067790"; transcript_id "TCONS_00219509"; exon_number "1"; gene_type "lincRNA";
2R	Cufflinks	exon	8563518	8563566	-	gene_id "XLOC_067790"; transcript_id "TCONS_00219509"; exon_number "2"; gene_type "lincRNA";
2R	Cufflinks	exon	8650800	8651053	-	gene_id "XLOC_067857"; transcript_id "TCONS_00265273"; exon_number "1"; gene_type "intronic_lncRNA";
2R	Cufflinks	exon	8651251	8651808	-	gene_id "XLOC_067857"; transcript_id "TCONS_00265273"; exon_number "2"; gene_type "intronic_lncRNA";
2R	Scripture	exon	8669850	8670047	-	gene_id "XLOC_067865"; transcript_id "TCONS_00390973"; exon_number "1"; gene_type "intronic_lncRNA";
2R	Scripture	exon	8670116	8670698	-	gene_id "XLOC_067865"; transcript_id "TCONS_00390973"; exon_number "2"; gene_type "intronic_lncRNA";
2R	Scripture	exon	8669850	8670047	-	gene_id "XLOC_067865"; transcript_id "TCONS_00390972"; exon_number "1"; gene_type "intronic_lncRNA";
2R	Scripture	exon	8670140	8670698	-	gene_id "XLOC_067865"; transcript_id "TCONS_00390972"; exon_number "2"; gene_type "intronic_lncRNA";
2R	Cufflinks	exon	8785334	8785552	-	gene_id "XLOC_067962"; transcript_id "TCONS_00265327"; exon_number "1"; gene_type "lincRNA";
2R	Cufflinks	exon	8795225	8795460	-	gene_id "XLOC_067973"; transcript_id "TCONS_00265333"; exon_number "1"; gene_type "lincRNA";
2R	Cufflinks	exon	9004732	9004950	-	gene_id "XLOC_068108"; transcript_id "TCONS_00244019"; exon_number "1"; gene_type "intronic_lncRNA";
2R	Cufflinks	exon	9982044	9982261	-	gene_id "XLOC_068631"; transcript_id "TCONS_00244428"; exon_number "1"; gene_type "lincRNA";
2R	Cufflinks	exon	10052655	10052985	-	gene_id "XLOC_068645"; transcript_id "TCONS_00220182"; exon_number "1"; gene_type "intronic_lncRNA";
2R	Cufflinks	exon	10076124	10076149	-	gene_id "XLOC_068653"; transcript_id "TCONS_00318888"; exon_number "1"; gene_type "lincRNA";
2R	Cufflinks	exon	10076246	10076469	-	gene_id "XLOC_068653"; transcript_id "TCONS_00318888"; exon_number "2"; gene_type "lincRNA";
2R	Cufflinks	exon	10129966	10130229	-	gene_id "XLOC_068681"; transcript_id "TCONS_00220198"; exon_number "1"; gene_type "intronic_lncRNA";
2R	Cufflinks	exon	10138225	10138426	-	gene_id "XLOC_068685"; transcript_id "TCONS_00244452"; exon_number "1"; gene_type "anti-sense_lncRNA";
2R	Cufflinks	exon	10263371	10263617	-	gene_id "XLOC_068812"; transcript_id "TCONS_00220288"; exon_number "1"; gene_type "lincRNA";
2R	Cufflinks	exon	10263681	10263750	-	gene_id "XLOC_068812"; transcript_id "TCONS_00220288"; exon_number "2"; gene_type "lincRNA";
2R	Cufflinks	exon	10438413	10438614	-	gene_id "XLOC_068910"; transcript_id "TCONS_00220327"; exon_number "1"; gene_type "intronic_lncRNA";
2R	Cufflinks	exon	10791751	10791954	-	gene_id "XLOC_069078"; transcript_id "TCONS_00284894"; exon_number "1"; gene_type "anti-sense_lncRNA";
2R	Cufflinks	exon	11042082	11042294	-	gene_id "XLOC_069301"; transcript_id "TCONS_00220604"; exon_number "1"; gene_type "intronic_lncRNA";
2R	Cufflinks	exon	11443242	11443465	-	gene_id "XLOC_069640"; transcript_id "TCONS_00266259"; exon_number "1"; gene_type "intronic_lncRNA";
2R	Cufflinks	exon	11477720	11477940	-	gene_id "XLOC_069656"; transcript_id "TCONS_00220887"; exon_number "1"; gene_type "intronic_lncRNA";
2R	Cufflinks	exon	11483054	11483277	-	gene_id "XLOC_069663"; transcript_id "TCONS_00245039"; exon_number "1"; gene_type "intronic_lncRNA";
2R	Cufflinks	exon	11766114	11766324	-	gene_id "XLOC_069904"; transcript_id "TCONS_00221034"; exon_number "1"; gene_type "intronic_lncRNA";
2R	Cufflinks	exon	12320539	12320821	-	gene_id "XLOC_070390"; transcript_id "TCONS_00221333"; exon_number "1"; gene_type "lincRNA";
2R	Cufflinks	exon	12320879	12321086	-	gene_id "XLOC_070390"; transcript_id "TCONS_00221333"; exon_number "2"; gene_type "lincRNA";
2R	Cufflinks	exon	12776970	12777174	-	gene_id "XLOC_070666"; transcript_id "TCONS_00221467"; exon_number "1"; gene_type "lincRNA";
2R	Cufflinks	exon	12890743	12890964	-	gene_id "XLOC_070763"; transcript_id "TCONS_00338076"; exon_number "1"; gene_type "intronic_lncRNA";
2R	Cufflinks	exon	12987127	12987397	-	gene_id "XLOC_070832"; transcript_id "TCONS_00338112"; exon_number "1"; gene_type "lincRNA";
2R	Cufflinks	exon	13255539	13255709	-	gene_id "XLOC_071035"; transcript_id "TCONS_00266909"; exon_number "1"; gene_type "lincRNA";
2R	Cufflinks	exon	13255783	13255834	-	gene_id "XLOC_071035"; transcript_id "TCONS_00266909"; exon_number "2"; gene_type "lincRNA";
2R	Scripture	exon	13255951	13255982	-	gene_id "XLOC_071036"; transcript_id "TCONS_00368470"; exon_number "1"; gene_type "anti-sense_lncRNA";
2R	Scripture	exon	13256154	13256697	-	gene_id "XLOC_071036"; transcript_id "TCONS_00368470"; exon_number "2"; gene_type "anti-sense_lncRNA";
2R	Cufflinks	exon	13273299	13273527	-	gene_id "XLOC_071049"; transcript_id "TCONS_00285757"; exon_number "1"; gene_type "intronic_lncRNA";
2R	Cufflinks	exon	13274091	13274296	-	gene_id "XLOC_071050"; transcript_id "TCONS_00221741"; exon_number "1"; gene_type "intronic_lncRNA";
2R	Cufflinks	exon	13303271	13303473	-	gene_id "XLOC_071078"; transcript_id "TCONS_00221771"; exon_number "1"; gene_type "lincRNA";
2R	Cufflinks	exon	13315268	13315476	-	gene_id "XLOC_071101"; transcript_id "TCONS_00302084"; exon_number "1"; gene_type "lincRNA";
2R	Cufflinks	exon	13386417	13386617	-	gene_id "XLOC_071173"; transcript_id "TCONS_00221856"; exon_number "1"; gene_type "lincRNA";
2R	Cufflinks	exon	13557220	13558159	-	gene_id "XLOC_071213"; transcript_id "TCONS_00267024"; exon_number "1"; gene_type "anti-sense_lncRNA";
2R	Cufflinks	exon	13799551	13799763	-	gene_id "XLOC_071472"; transcript_id "TCONS_00267125"; exon_number "1"; gene_type "intronic_lncRNA";
2R	Cufflinks	exon	14145370	14145858	-	gene_id "XLOC_071586"; transcript_id "TCONS_00246235"; exon_number "1"; gene_type "lincRNA";
2R	Cufflinks	exon	14147173	14147234	-	gene_id "XLOC_071586"; transcript_id "TCONS_00246235"; exon_number "2"; gene_type "lincRNA";
2R	Cufflinks	exon	14330323	14330529	-	gene_id "XLOC_071668"; transcript_id "TCONS_00267210"; exon_number "1"; gene_type "intronic_lncRNA";
2R	Cufflinks	exon	14455055	14455262	-	gene_id "XLOC_071802"; transcript_id "TCONS_00246352"; exon_number "1"; gene_type "intronic_lncRNA";
2R	Cufflinks	exon	14825054	14825258	-	gene_id "XLOC_072148"; transcript_id "TCONS_00246580"; exon_number "1"; gene_type "lincRNA";
2R	Cufflinks	exon	14998730	14998955	-	gene_id "XLOC_072226"; transcript_id "TCONS_00338729"; exon_number "1"; gene_type "lincRNA";
2R	Cufflinks	exon	15238855	15239240	-	gene_id "XLOC_072476"; transcript_id "TCONS_00222635"; exon_number "1"; gene_type "intronic_lncRNA";
2R	Cufflinks	exon	15417858	15418079	-	gene_id "XLOC_072583"; transcript_id "TCONS_00246807"; exon_number "1"; gene_type "intronic_lncRNA";
2R	Cufflinks	exon	15598303	15598503	-	gene_id "XLOC_072749"; transcript_id "TCONS_00302659"; exon_number "1"; gene_type "lincRNA";
2R	Cufflinks	exon	16119824	16120048	-	gene_id "XLOC_073098"; transcript_id "TCONS_00223011"; exon_number "1"; gene_type "anti-sense_lncRNA";
2R	Cufflinks	exon	16734259	16734460	-	gene_id "XLOC_073515"; transcript_id "TCONS_00247351"; exon_number "1"; gene_type "lincRNA";
2R	Scripture	exon	17142490	17143695	-	gene_id "XLOC_073604"; transcript_id "TCONS_00386221"; exon_number "1"; gene_type "lincRNA";
2R	Scripture	exon	17145622	17145746	-	gene_id "XLOC_073604"; transcript_id "TCONS_00386221"; exon_number "2"; gene_type "lincRNA";
2R	Cufflinks	exon	17028378	17028577	-	gene_id "XLOC_073762"; transcript_id "TCONS_00223431"; exon_number "1"; gene_type "intronic_lncRNA";
2R	Cufflinks	exon	17207116	17207321	-	gene_id "XLOC_073900"; transcript_id "TCONS_00286961"; exon_number "1"; gene_type "lincRNA";
2R	Cufflinks	exon	17355018	17355241	-	gene_id "XLOC_074061"; transcript_id "TCONS_00268352"; exon_number "1"; gene_type "intronic_lncRNA";
2R	Cufflinks	exon	17815574	17816455	-	gene_id "XLOC_074300"; transcript_id "TCONS_00247796"; exon_number "1"; gene_type "intronic_lncRNA";
2R	Cufflinks	exon	17819744	17819821	-	gene_id "XLOC_074300"; transcript_id "TCONS_00247796"; exon_number "2"; gene_type "intronic_lncRNA";
2R	Cufflinks	exon	17874080	17874288	-	gene_id "XLOC_074333"; transcript_id "TCONS_00287123"; exon_number "1"; gene_type "intronic_lncRNA";
2R	Cufflinks	exon	17957069	17957273	-	gene_id "XLOC_074442"; transcript_id "TCONS_00247875"; exon_number "1"; gene_type "lincRNA";
2R	Cufflinks	exon	17970661	17970867	-	gene_id "XLOC_074465"; transcript_id "TCONS_00268552"; exon_number "1"; gene_type "lincRNA";
2R	Cufflinks	exon	18127328	18127537	-	gene_id "XLOC_074614"; transcript_id "TCONS_00268657"; exon_number "1"; gene_type "intronic_lncRNA";
2R	Cufflinks	exon	18323165	18323383	-	gene_id "XLOC_074800"; transcript_id "TCONS_00224035"; exon_number "1"; gene_type "intronic_lncRNA";
2R	Cufflinks	exon	18341060	18341277	-	gene_id "XLOC_074823"; transcript_id "TCONS_00303457"; exon_number "1"; gene_type "intronic_lncRNA";
2R	Cufflinks	exon	18379006	18379218	-	gene_id "XLOC_074860"; transcript_id "TCONS_00224064"; exon_number "1"; gene_type "lincRNA";
2R	Cufflinks	exon	18402655	18402874	-	gene_id "XLOC_074883"; transcript_id "TCONS_00287344"; exon_number "1"; gene_type "lincRNA";
2R	Cufflinks	exon	18404115	18404314	-	gene_id "XLOC_074884"; transcript_id "TCONS_00287345"; exon_number "1"; gene_type "lincRNA";
2R	Cufflinks	exon	18696456	18696699	-	gene_id "XLOC_075084"; transcript_id "TCONS_00268867"; exon_number "1"; gene_type "anti-sense_lncRNA";
2R	Cufflinks	exon	18766289	18766516	-	gene_id "XLOC_075143"; transcript_id "TCONS_00224213"; exon_number "1"; gene_type "intronic_lncRNA";
2R	Cufflinks	exon	18916450	18916665	-	gene_id "XLOC_075259"; transcript_id "TCONS_00287476"; exon_number "1"; gene_type "intronic_lncRNA";
2R	Cufflinks	exon	19009080	19009288	-	gene_id "XLOC_075351"; transcript_id "TCONS_00268976"; exon_number "1"; gene_type "lincRNA";
2R	Cufflinks	exon	19247690	19247896	-	gene_id "XLOC_075567"; transcript_id "TCONS_00269081"; exon_number "1"; gene_type "lincRNA";
2R	Cufflinks	exon	19548831	19549135	-	gene_id "XLOC_075759"; transcript_id "TCONS_00248621"; exon_number "1"; gene_type "intronic_lncRNA";
2R	Cufflinks	exon	19989975	19990180	-	gene_id "XLOC_076198"; transcript_id "TCONS_00248954"; exon_number "1"; gene_type "lincRNA";
2R	Cufflinks	exon	20065864	20065910	-	gene_id "XLOC_076307"; transcript_id "TCONS_00249034"; exon_number "1"; gene_type "lincRNA";
2R	Cufflinks	exon	20065967	20067081	-	gene_id "XLOC_076307"; transcript_id "TCONS_00249034"; exon_number "2"; gene_type "lincRNA";
2R	Cufflinks	exon	20158246	20158454	-	gene_id "XLOC_076429"; transcript_id "TCONS_00249115"; exon_number "1"; gene_type "lincRNA";
2R	Cufflinks	exon	20180578	20180816	-	gene_id "XLOC_076474"; transcript_id "TCONS_00269583"; exon_number "1"; gene_type "lincRNA";
2R	Cufflinks	exon	20816469	20816676	-	gene_id "XLOC_077149"; transcript_id "TCONS_00249539"; exon_number "1"; gene_type "lincRNA";
2R	Cufflinks	exon	20909505	20909711	-	gene_id "XLOC_077247"; transcript_id "TCONS_00249621"; exon_number "1"; gene_type "anti-sense_lncRNA";
2R	Cufflinks	exon	20934832	20935042	-	gene_id "XLOC_077291"; transcript_id "TCONS_00249637"; exon_number "1"; gene_type "intronic_lncRNA";
2R	Cufflinks	exon	21047692	21048847	-	gene_id "XLOC_077394"; transcript_id "TCONS_00225554"; exon_number "1"; gene_type "lincRNA";
2R	Cufflinks	exon	21048963	21049424	-	gene_id "XLOC_077394"; transcript_id "TCONS_00225554"; exon_number "2"; gene_type "lincRNA";
2R	Cufflinks	exon	21114189	21114389	-	gene_id "XLOC_077440"; transcript_id "TCONS_00270036"; exon_number "1"; gene_type "intronic_lncRNA";
2R	Scripture	exon	21297554	21298192	-	gene_id "XLOC_077552"; transcript_id "TCONS_00370101"; exon_number "1"; gene_type "intronic_lncRNA";
2R	Scripture	exon	21298258	21298285	-	gene_id "XLOC_077552"; transcript_id "TCONS_00370101"; exon_number "2"; gene_type "intronic_lncRNA";
2R	Scripture	exon	21297554	21298192	-	gene_id "XLOC_077552"; transcript_id "TCONS_00370100"; exon_number "1"; gene_type "intronic_lncRNA";
2R	Scripture	exon	21298263	21298285	-	gene_id "XLOC_077552"; transcript_id "TCONS_00370100"; exon_number "2"; gene_type "intronic_lncRNA";
2R	Scripture	exon	21329768	21330313	-	gene_id "XLOC_077561"; transcript_id "TCONS_00379772"; exon_number "1"; gene_type "anti-sense_lncRNA";
2R	Scripture	exon	21330616	21331256	-	gene_id "XLOC_077561"; transcript_id "TCONS_00379772"; exon_number "2"; gene_type "anti-sense_lncRNA";
2R	Cufflinks	exon	21663267	21663484	-	gene_id "XLOC_077741"; transcript_id "TCONS_00270168"; exon_number "1"; gene_type "lincRNA";
2R	Cufflinks	exon	21947919	21948125	-	gene_id "XLOC_078044"; transcript_id "TCONS_00270306"; exon_number "1"; gene_type "lincRNA";
2R	Cufflinks	exon	21972098	21972308	-	gene_id "XLOC_078095"; transcript_id "TCONS_00225875"; exon_number "1"; gene_type "lincRNA";
2R	Cufflinks	exon	22197133	22197369	-	gene_id "XLOC_078295"; transcript_id "TCONS_00226010"; exon_number "1"; gene_type "intronic_lncRNA";
2R	Cufflinks	exon	22261829	22262033	-	gene_id "XLOC_078348"; transcript_id "TCONS_00250270"; exon_number "1"; gene_type "intronic_lncRNA";
2R	Scripture	exon	22317661	22320622	-	gene_id "XLOC_078401"; transcript_id "TCONS_00370195"; exon_number "1"; gene_type "anti-sense_lncRNA";
2R	Scripture	exon	22320782	22324606	-	gene_id "XLOC_078401"; transcript_id "TCONS_00370195"; exon_number "2"; gene_type "anti-sense_lncRNA";
2R	Cufflinks	exon	22384773	22384983	-	gene_id "XLOC_078451"; transcript_id "TCONS_00304633"; exon_number "1"; gene_type "intronic_lncRNA";
2R	Cufflinks	exon	22501766	22501980	-	gene_id "XLOC_078545"; transcript_id "TCONS_00250359"; exon_number "1"; gene_type "intronic_lncRNA";
2R	Cufflinks	exon	22590169	22590472	-	gene_id "XLOC_078622"; transcript_id "TCONS_00250391"; exon_number "1"; gene_type "intronic_lncRNA";
2R	Cufflinks	exon	22903246	22903463	-	gene_id "XLOC_078847"; transcript_id "TCONS_00226363"; exon_number "1"; gene_type "intronic_lncRNA";
2R	Cufflinks	exon	22905537	22905736	-	gene_id "XLOC_078850"; transcript_id "TCONS_00250564"; exon_number "1"; gene_type "intronic_lncRNA";
2R	Cufflinks	exon	23215038	23215256	-	gene_id "XLOC_079236"; transcript_id "TCONS_00270912"; exon_number "1"; gene_type "lincRNA";
2R	Cufflinks	exon	23436352	23436553	-	gene_id "XLOC_079479"; transcript_id "TCONS_00251042"; exon_number "1"; gene_type "lincRNA";
2R	Cufflinks	exon	23459131	23459330	-	gene_id "XLOC_079519"; transcript_id "TCONS_00226814"; exon_number "1"; gene_type "intronic_lncRNA";
2R	Cufflinks	exon	23710576	23710811	-	gene_id "XLOC_079725"; transcript_id "TCONS_00251169"; exon_number "1"; gene_type "lincRNA";
2R	Scripture	exon	23713744	23714160	-	gene_id "XLOC_079728"; transcript_id "TCONS_00392861"; exon_number "1"; gene_type "anti-sense_lncRNA";
2R	Scripture	exon	23714270	23714742	-	gene_id "XLOC_079728"; transcript_id "TCONS_00392861"; exon_number "2"; gene_type "anti-sense_lncRNA";
2R	Cufflinks	exon	23729267	23729477	-	gene_id "XLOC_079735"; transcript_id "TCONS_00226923"; exon_number "1"; gene_type "intronic_lncRNA";
2R	Cufflinks	exon	23819666	23819883	-	gene_id "XLOC_079790"; transcript_id "TCONS_00251198"; exon_number "1"; gene_type "lincRNA";
2R	Cufflinks	exon	24055370	24055473	-	gene_id "XLOC_079862"; transcript_id "TCONS_00289512"; exon_number "1"; gene_type "anti-sense_lncRNA";
2R	Cufflinks	exon	24055559	24056042	-	gene_id "XLOC_079862"; transcript_id "TCONS_00289512"; exon_number "2"; gene_type "anti-sense_lncRNA";
2R	Cufflinks	exon	24059448	24059735	-	gene_id "XLOC_079864"; transcript_id "TCONS_00227038"; exon_number "1"; gene_type "anti-sense_lncRNA";
2R	Cufflinks	exon	24059814	24060010	-	gene_id "XLOC_079864"; transcript_id "TCONS_00227038"; exon_number "2"; gene_type "anti-sense_lncRNA";
2R	Cufflinks	exon	24081952	24082172	-	gene_id "XLOC_079875"; transcript_id "TCONS_00227050"; exon_number "1"; gene_type "anti-sense_lncRNA";
2R	Cufflinks	exon	24083273	24083481	-	gene_id "XLOC_079877"; transcript_id "TCONS_00271201"; exon_number "1"; gene_type "anti-sense_lncRNA";
2R	Cufflinks	exon	24340818	24341017	-	gene_id "XLOC_080084"; transcript_id "TCONS_00227179"; exon_number "1"; gene_type "lincRNA";
2R	Cufflinks	exon	24724061	24724265	-	gene_id "XLOC_080329"; transcript_id "TCONS_00289773"; exon_number "1"; gene_type "intronic_lncRNA";
2R	Cufflinks	exon	24724972	24725194	-	gene_id "XLOC_080329"; transcript_id "TCONS_00251603"; exon_number "1"; gene_type "intronic_lncRNA";
2R	Cufflinks	exon	25205540	25205744	-	gene_id "XLOC_080695"; transcript_id "TCONS_00227672"; exon_number "1"; gene_type "intronic_lncRNA";
3Cen_mapped_Scaffold_31_D1643_D1653_D1791	Cufflinks	exon	29123	29332	+	gene_id "XLOC_085509"; transcript_id "TCONS_00412437"; exon_number "1"; gene_type "lincRNA";
3L	Cufflinks	exon	89384	90024	+	gene_id "XLOC_085618"; transcript_id "TCONS_00529500"; exon_number "1"; gene_type "lincRNA";
3L	Cufflinks	exon	90385	90501	+	gene_id "XLOC_085618"; transcript_id "TCONS_00529500"; exon_number "2"; gene_type "lincRNA";
3L	Cufflinks	exon	90739	91722	+	gene_id "XLOC_085618"; transcript_id "TCONS_00529500"; exon_number "3"; gene_type "lincRNA";
3L	Cufflinks	exon	91904	92561	+	gene_id "XLOC_085618"; transcript_id "TCONS_00440139"; exon_number "1"; gene_type "lincRNA";
3L	Cufflinks	exon	93021	94362	+	gene_id "XLOC_085618"; transcript_id "TCONS_00440139"; exon_number "2"; gene_type "lincRNA";
3L	Cufflinks	exon	616470	616693	+	gene_id "XLOC_085825"; transcript_id "TCONS_00468239"; exon_number "1"; gene_type "lincRNA";
3L	Cufflinks	exon	621414	621619	+	gene_id "XLOC_085832"; transcript_id "TCONS_00468243"; exon_number "1"; gene_type "anti-sense_lncRNA";
3L	Cufflinks	exon	638516	640186	+	gene_id "XLOC_085839"; transcript_id "TCONS_00412803"; exon_number "1"; gene_type "lincRNA";
3L	Cufflinks	exon	640296	644500	+	gene_id "XLOC_085839"; transcript_id "TCONS_00412803"; exon_number "2"; gene_type "lincRNA";
3L	Cufflinks	exon	639130	640186	+	gene_id "XLOC_085839"; transcript_id "TCONS_00468255"; exon_number "1"; gene_type "lincRNA";
3L	Cufflinks	exon	640296	640686	+	gene_id "XLOC_085839"; transcript_id "TCONS_00468255"; exon_number "2"; gene_type "lincRNA";
3L	Cufflinks	exon	640892	643629	+	gene_id "XLOC_085839"; transcript_id "TCONS_00468255"; exon_number "3"; gene_type "lincRNA";
3L	Scripture	exon	681857	682211	+	gene_id "XLOC_085884"; transcript_id "TCONS_00608876"; exon_number "1"; gene_type "anti-sense_lncRNA";
3L	Scripture	exon	682276	682594	+	gene_id "XLOC_085884"; transcript_id "TCONS_00608876"; exon_number "2"; gene_type "anti-sense_lncRNA";
3L	Cufflinks	exon	739585	739792	+	gene_id "XLOC_085949"; transcript_id "TCONS_00440403"; exon_number "1"; gene_type "intronic_lncRNA";
3L	Cufflinks	exon	1119507	1119726	+	gene_id "XLOC_086247"; transcript_id "TCONS_00440611"; exon_number "1"; gene_type "lincRNA";
3L	Cufflinks	exon	1182273	1182511	+	gene_id "XLOC_086319"; transcript_id "TCONS_00491042"; exon_number "1"; gene_type "lincRNA";
3L	Cufflinks	exon	1480884	1480995	+	gene_id "XLOC_086607"; transcript_id "TCONS_00512224"; exon_number "1"; gene_type "intronic_lncRNA";
3L	Cufflinks	exon	1481082	1481680	+	gene_id "XLOC_086607"; transcript_id "TCONS_00512224"; exon_number "2"; gene_type "intronic_lncRNA";
3L	Cufflinks	exon	1481721	1481752	+	gene_id "XLOC_086607"; transcript_id "TCONS_00468721"; exon_number "1"; gene_type "intronic_lncRNA";
3L	Cufflinks	exon	1481816	1482516	+	gene_id "XLOC_086607"; transcript_id "TCONS_00468721"; exon_number "2"; gene_type "intronic_lncRNA";
3L	Cufflinks	exon	1482633	1483490	+	gene_id "XLOC_086608"; transcript_id "TCONS_00491199"; exon_number "1"; gene_type "intronic_lncRNA";
3L	Cufflinks	exon	1483792	1483875	+	gene_id "XLOC_086608"; transcript_id "TCONS_00491199"; exon_number "2"; gene_type "intronic_lncRNA";
3L	Cufflinks	exon	1487509	1487596	+	gene_id "XLOC_086610"; transcript_id "TCONS_00440863"; exon_number "1"; gene_type "anti-sense_lncRNA";
3L	Cufflinks	exon	1487652	1487945	+	gene_id "XLOC_086610"; transcript_id "TCONS_00440863"; exon_number "2"; gene_type "anti-sense_lncRNA";
3L	Cufflinks	exon	1488457	1489530	+	gene_id "XLOC_086610"; transcript_id "TCONS_00413373"; exon_number "1"; gene_type "anti-sense_lncRNA";
3L	Scripture	exon	2088433	2089139	+	gene_id "XLOC_087009"; transcript_id "TCONS_00413624"; exon_number "1"; gene_type "intronic_lncRNA";
3L	Scripture	exon	2089196	2091129	+	gene_id "XLOC_087009"; transcript_id "TCONS_00413624"; exon_number "2"; gene_type "intronic_lncRNA";
3L	Cufflinks	exon	2142921	2143125	+	gene_id "XLOC_087030"; transcript_id "TCONS_00413633"; exon_number "1"; gene_type "intronic_lncRNA";
3L	Cufflinks	exon	2192364	2192564	+	gene_id "XLOC_087085"; transcript_id "TCONS_00468935"; exon_number "1"; gene_type "lincRNA";
3L	Cufflinks	exon	2221651	2221850	+	gene_id "XLOC_087129"; transcript_id "TCONS_00441159"; exon_number "1"; gene_type "lincRNA";
3L	Cufflinks	exon	2319907	2320109	+	gene_id "XLOC_087213"; transcript_id "TCONS_00441239"; exon_number "1"; gene_type "lincRNA";
3L	Cufflinks	exon	2860790	2860994	+	gene_id "XLOC_087548"; transcript_id "TCONS_00441466"; exon_number "1"; gene_type "intronic_lncRNA";
3L	Cufflinks	exon	2876836	2877064	+	gene_id "XLOC_087566"; transcript_id "TCONS_00441473"; exon_number "1"; gene_type "intronic_lncRNA";
3L	Cufflinks	exon	2951786	2951991	+	gene_id "XLOC_087644"; transcript_id "TCONS_00414052"; exon_number "1"; gene_type "intronic_lncRNA";
3L	Cufflinks	exon	3407759	3407989	+	gene_id "XLOC_087912"; transcript_id "TCONS_00469400"; exon_number "1"; gene_type "intronic_lncRNA";
3L	Cufflinks	exon	3409994	3410206	+	gene_id "XLOC_087913"; transcript_id "TCONS_00414278"; exon_number "1"; gene_type "intronic_lncRNA";
3L	Cufflinks	exon	3763317	3763522	+	gene_id "XLOC_088134"; transcript_id "TCONS_00551937"; exon_number "1"; gene_type "intronic_lncRNA";
3L	Scripture	exon	3940007	3940710	+	gene_id "XLOC_088268"; transcript_id "TCONS_00592240"; exon_number "1"; gene_type "anti-sense_lncRNA";
3L	Scripture	exon	3941112	3941304	+	gene_id "XLOC_088268"; transcript_id "TCONS_00592240"; exon_number "2"; gene_type "anti-sense_lncRNA";
3L	Cufflinks	exon	4077037	4077247	+	gene_id "XLOC_088385"; transcript_id "TCONS_00442114"; exon_number "1"; gene_type "intronic_lncRNA";
3L	Scripture	exon	4256560	4257052	+	gene_id "XLOC_088473"; transcript_id "TCONS_00592268"; exon_number "1"; gene_type "anti-sense_lncRNA";
3L	Scripture	exon	4257146	4257256	+	gene_id "XLOC_088473"; transcript_id "TCONS_00592268"; exon_number "2"; gene_type "anti-sense_lncRNA";
3L	Cufflinks	exon	4345558	4346288	+	gene_id "XLOC_088539"; transcript_id "TCONS_00512991"; exon_number "1"; gene_type "intronic_lncRNA";
3L	Cufflinks	exon	4346809	4348225	+	gene_id "XLOC_088539"; transcript_id "TCONS_00512991"; exon_number "2"; gene_type "intronic_lncRNA";
3L	Scripture	exon	4345850	4346284	+	gene_id "XLOC_088539"; transcript_id "TCONS_00552109"; exon_number "1"; gene_type "intronic_lncRNA";
3L	Scripture	exon	4346809	4348321	+	gene_id "XLOC_088539"; transcript_id "TCONS_00552109"; exon_number "2"; gene_type "intronic_lncRNA";
3L	Cufflinks	exon	4363593	4363822	+	gene_id "XLOC_088552"; transcript_id "TCONS_00414700"; exon_number "1"; gene_type "intronic_lncRNA";
3L	Cufflinks	exon	4422894	4423103	+	gene_id "XLOC_088590"; transcript_id "TCONS_00442259"; exon_number "1"; gene_type "intronic_lncRNA";
3L	Cufflinks	exon	4634710	4634913	+	gene_id "XLOC_088760"; transcript_id "TCONS_00442374"; exon_number "1"; gene_type "anti-sense_lncRNA";
3L	Cufflinks	exon	4734483	4734730	+	gene_id "XLOC_088845"; transcript_id "TCONS_00414868"; exon_number "1"; gene_type "intronic_lncRNA";
3L	Cufflinks	exon	4764185	4764409	+	gene_id "XLOC_088879"; transcript_id "TCONS_00414917"; exon_number "1"; gene_type "intronic_lncRNA";
3L	Cufflinks	exon	4853779	4854035	+	gene_id "XLOC_088956"; transcript_id "TCONS_00414982"; exon_number "1"; gene_type "lincRNA";
3L	Cufflinks	exon	5027354	5027595	+	gene_id "XLOC_089157"; transcript_id "TCONS_00492446"; exon_number "1"; gene_type "intronic_lncRNA";
3L	Cufflinks	exon	5245646	5245862	+	gene_id "XLOC_089344"; transcript_id "TCONS_00442690"; exon_number "1"; gene_type "intronic_lncRNA";
3L	Cufflinks	exon	5800765	5800966	+	gene_id "XLOC_089920"; transcript_id "TCONS_00443025"; exon_number "1"; gene_type "intronic_lncRNA";
3L	Cufflinks	exon	5853212	5853442	+	gene_id "XLOC_089961"; transcript_id "TCONS_00492752"; exon_number "1"; gene_type "lincRNA";
3L	Scripture	exon	6232264	6232792	+	gene_id "XLOC_090350"; transcript_id "TCONS_00615467"; exon_number "1"; gene_type "anti-sense_lncRNA";
3L	Scripture	exon	6232853	6233721	+	gene_id "XLOC_090350"; transcript_id "TCONS_00615467"; exon_number "2"; gene_type "anti-sense_lncRNA";
3L	Cufflinks	exon	6312676	6312883	+	gene_id "XLOC_090440"; transcript_id "TCONS_00443382"; exon_number "1"; gene_type "lincRNA";
3L	Cufflinks	exon	6666292	6666499	+	gene_id "XLOC_090775"; transcript_id "TCONS_00443560"; exon_number "1"; gene_type "lincRNA";
3L	Cufflinks	exon	6723997	6724204	+	gene_id "XLOC_090846"; transcript_id "TCONS_00470835"; exon_number "1"; gene_type "lincRNA";
3L	Cufflinks	exon	6759183	6759386	+	gene_id "XLOC_090864"; transcript_id "TCONS_00443609"; exon_number "1"; gene_type "intronic_lncRNA";
3L	Cufflinks	exon	6816607	6816813	+	gene_id "XLOC_090948"; transcript_id "TCONS_00443671"; exon_number "1"; gene_type "lincRNA";
3L	Cufflinks	exon	6877022	6877231	+	gene_id "XLOC_091048"; transcript_id "TCONS_00416162"; exon_number "1"; gene_type "lincRNA";
3L	Cufflinks	exon	7392441	7392647	+	gene_id "XLOC_091568"; transcript_id "TCONS_00514089"; exon_number "1"; gene_type "intronic_lncRNA";
3L	Cufflinks	exon	7714885	7715112	+	gene_id "XLOC_091820"; transcript_id "TCONS_00532449"; exon_number "1"; gene_type "anti-sense_lncRNA";
3L	Cufflinks	exon	7792647	7792872	+	gene_id "XLOC_091887"; transcript_id "TCONS_00532471"; exon_number "1"; gene_type "intronic_lncRNA";
3L	Cufflinks	exon	8294336	8294536	+	gene_id "XLOC_092148"; transcript_id "TCONS_00416824"; exon_number "1"; gene_type "intronic_lncRNA";
3L	Cufflinks	exon	8672262	8672474	+	gene_id "XLOC_092363"; transcript_id "TCONS_00444543"; exon_number "1"; gene_type "lincRNA";
3L	Cufflinks	exon	9158812	9159021	+	gene_id "XLOC_092607"; transcript_id "TCONS_00553737"; exon_number "1"; gene_type "intronic_lncRNA";
3L	Cufflinks	exon	9236542	9236748	+	gene_id "XLOC_092705"; transcript_id "TCONS_00417270"; exon_number "1"; gene_type "anti-sense_lncRNA";
3L	Scripture	exon	9510282	9510624	+	gene_id "XLOC_092909"; transcript_id "TCONS_00593240"; exon_number "1"; gene_type "anti-sense_lncRNA";
3L	Cufflinks	exon	9528697	9528901	+	gene_id "XLOC_092935"; transcript_id "TCONS_00444909"; exon_number "1"; gene_type "lincRNA";
3L	Cufflinks	exon	9598444	9598652	+	gene_id "XLOC_092986"; transcript_id "TCONS_00417458"; exon_number "1"; gene_type "intronic_lncRNA";
3L	Cufflinks	exon	9737783	9738028	+	gene_id "XLOC_093037"; transcript_id "TCONS_00417512"; exon_number "1"; gene_type "intronic_lncRNA";
3L	Cufflinks	exon	10160725	10160940	+	gene_id "XLOC_093358"; transcript_id "TCONS_00514888"; exon_number "1"; gene_type "intronic_lncRNA";
3L	Cufflinks	exon	10280473	10280682	+	gene_id "XLOC_093525"; transcript_id "TCONS_00472230"; exon_number "1"; gene_type "lincRNA";
3L	Cufflinks	exon	10332227	10332800	+	gene_id "XLOC_093566"; transcript_id "TCONS_00554193"; exon_number "1"; gene_type "lincRNA";
3L	Cufflinks	exon	10333078	10333497	+	gene_id "XLOC_093566"; transcript_id "TCONS_00554193"; exon_number "2"; gene_type "lincRNA";
3L	Cufflinks	exon	10332236	10332800	+	gene_id "XLOC_093566"; transcript_id "TCONS_00417821"; exon_number "1"; gene_type "lincRNA";
3L	Cufflinks	exon	10348193	10348243	+	gene_id "XLOC_093566"; transcript_id "TCONS_00417821"; exon_number "2"; gene_type "lincRNA";
3L	Cufflinks	exon	10332236	10332800	+	gene_id "XLOC_093566"; transcript_id "TCONS_00417822"; exon_number "1"; gene_type "lincRNA";
3L	Cufflinks	exon	10348193	10348230	+	gene_id "XLOC_093566"; transcript_id "TCONS_00417822"; exon_number "2"; gene_type "lincRNA";
3L	Cufflinks	exon	10358991	10360695	+	gene_id "XLOC_093566"; transcript_id "TCONS_00417822"; exon_number "3"; gene_type "lincRNA";
3L	Cufflinks	exon	10376588	10376836	+	gene_id "XLOC_093613"; transcript_id "TCONS_00554232"; exon_number "1"; gene_type "lincRNA";
3L	Cufflinks	exon	10428557	10428782	+	gene_id "XLOC_093697"; transcript_id "TCONS_00533400"; exon_number "1"; gene_type "lincRNA";
3L	Cufflinks	exon	10437399	10437600	+	gene_id "XLOC_093709"; transcript_id "TCONS_00417926"; exon_number "1"; gene_type "lincRNA";
3L	Cufflinks	exon	10605081	10605284	+	gene_id "XLOC_093908"; transcript_id "TCONS_00418013"; exon_number "1"; gene_type "lincRNA";
3L	Cufflinks	exon	10699721	10699951	+	gene_id "XLOC_093971"; transcript_id "TCONS_00445532"; exon_number "1"; gene_type "lincRNA";
3L	Cufflinks	exon	10784598	10784626	+	gene_id "XLOC_094117"; transcript_id "TCONS_00418109"; exon_number "1"; gene_type "lincRNA";
3L	Cufflinks	exon	10784892	10785563	+	gene_id "XLOC_094117"; transcript_id "TCONS_00418109"; exon_number "2"; gene_type "lincRNA";
3L	Cufflinks	exon	10917820	10918094	+	gene_id "XLOC_094301"; transcript_id "TCONS_00494783"; exon_number "1"; gene_type "lincRNA";
3L	Cufflinks	exon	10921584	10921783	+	gene_id "XLOC_094311"; transcript_id "TCONS_00418209"; exon_number "1"; gene_type "lincRNA";
3L	Cufflinks	exon	10950402	10950634	+	gene_id "XLOC_094362"; transcript_id "TCONS_00445762"; exon_number "1"; gene_type "lincRNA";
3L	Cufflinks	exon	11094386	11094610	+	gene_id "XLOC_094517"; transcript_id "TCONS_00418308"; exon_number "1"; gene_type "anti-sense_lncRNA";
3L	Cufflinks	exon	11297983	11298459	+	gene_id "XLOC_094638"; transcript_id "TCONS_00418384"; exon_number "1"; gene_type "lincRNA";
3L	Cufflinks	exon	11301677	11302286	+	gene_id "XLOC_094638"; transcript_id "TCONS_00418384"; exon_number "2"; gene_type "lincRNA";
3L	Cufflinks	exon	11338193	11338399	+	gene_id "XLOC_094695"; transcript_id "TCONS_00445979"; exon_number "1"; gene_type "lincRNA";
3L	Cufflinks	exon	11385869	11386070	+	gene_id "XLOC_094773"; transcript_id "TCONS_00446034"; exon_number "1"; gene_type "lincRNA";
3L	Cufflinks	exon	11652504	11652780	+	gene_id "XLOC_095050"; transcript_id "TCONS_00418598"; exon_number "1"; gene_type "intronic_lncRNA";
3L	Cufflinks	exon	11652843	11652872	+	gene_id "XLOC_095050"; transcript_id "TCONS_00418598"; exon_number "2"; gene_type "intronic_lncRNA";
3L	Cufflinks	exon	11656516	11656551	+	gene_id "XLOC_095055"; transcript_id "TCONS_00418600"; exon_number "1"; gene_type "intronic_lncRNA";
3L	Cufflinks	exon	11656637	11657091	+	gene_id "XLOC_095055"; transcript_id "TCONS_00418600"; exon_number "2"; gene_type "intronic_lncRNA";
3L	Cufflinks	exon	11745300	11745501	+	gene_id "XLOC_095116"; transcript_id "TCONS_00533999"; exon_number "1"; gene_type "intronic_lncRNA";
3L	Cufflinks	exon	11918461	11918661	+	gene_id "XLOC_095287"; transcript_id "TCONS_00534058"; exon_number "1"; gene_type "intronic_lncRNA";
3L	Cufflinks	exon	12094807	12095006	+	gene_id "XLOC_095439"; transcript_id "TCONS_00473088"; exon_number "1"; gene_type "lincRNA";
3L	Cufflinks	exon	12377401	12377620	+	gene_id "XLOC_095689"; transcript_id "TCONS_00446593"; exon_number "1"; gene_type "intronic_lncRNA";
3L	Cufflinks	exon	12459652	12459862	+	gene_id "XLOC_095776"; transcript_id "TCONS_00473219"; exon_number "1"; gene_type "lincRNA";
3L	Cufflinks	exon	12606151	12606362	+	gene_id "XLOC_095882"; transcript_id "TCONS_00495420"; exon_number "1"; gene_type "lincRNA";
3L	Cufflinks	exon	12667682	12667749	+	gene_id "XLOC_095955"; transcript_id "TCONS_00473323"; exon_number "1"; gene_type "lincRNA";
3L	Cufflinks	exon	12668208	12668347	+	gene_id "XLOC_095955"; transcript_id "TCONS_00473323"; exon_number "2"; gene_type "lincRNA";
3L	Cufflinks	exon	13125555	13125773	+	gene_id "XLOC_096381"; transcript_id "TCONS_00419376"; exon_number "1"; gene_type "lincRNA";
3L	Cufflinks	exon	13216056	13216268	+	gene_id "XLOC_096535"; transcript_id "TCONS_00473649"; exon_number "1"; gene_type "lincRNA";
3L	Cufflinks	exon	13345517	13345722	+	gene_id "XLOC_096654"; transcript_id "TCONS_00473706"; exon_number "1"; gene_type "lincRNA";
3L	Cufflinks	exon	13750722	13750934	+	gene_id "XLOC_097070"; transcript_id "TCONS_00496018"; exon_number "1"; gene_type "intronic_lncRNA";
3L	Cufflinks	exon	13877102	13877315	+	gene_id "XLOC_097197"; transcript_id "TCONS_00473916"; exon_number "1"; gene_type "intronic_lncRNA";
3L	Cufflinks	exon	14114703	14114922	+	gene_id "XLOC_097308"; transcript_id "TCONS_00496113"; exon_number "1"; gene_type "intronic_lncRNA";
3L	Cufflinks	exon	14153239	14153464	+	gene_id "XLOC_097367"; transcript_id "TCONS_00535010"; exon_number "1"; gene_type "lincRNA";
3L	Cufflinks	exon	14272007	14272083	+	gene_id "XLOC_097475"; transcript_id "TCONS_00419973"; exon_number "1"; gene_type "lincRNA";
3L	Cufflinks	exon	14272211	14272819	+	gene_id "XLOC_097475"; transcript_id "TCONS_00419973"; exon_number "2"; gene_type "lincRNA";
3L	Cufflinks	exon	14436834	14437042	+	gene_id "XLOC_097531"; transcript_id "TCONS_00474059"; exon_number "1"; gene_type "intronic_lncRNA";
3L	Cufflinks	exon	14440375	14440575	+	gene_id "XLOC_097533"; transcript_id "TCONS_00420014"; exon_number "1"; gene_type "intronic_lncRNA";
3L	Cufflinks	exon	14515392	14515594	+	gene_id "XLOC_097567"; transcript_id "TCONS_00420019"; exon_number "1"; gene_type "intronic_lncRNA";
3L	Cufflinks	exon	14902632	14902853	+	gene_id "XLOC_097778"; transcript_id "TCONS_00555953"; exon_number "1"; gene_type "lincRNA";
3L	Cufflinks	exon	15356646	15356860	+	gene_id "XLOC_098254"; transcript_id "TCONS_00420466"; exon_number "1"; gene_type "lincRNA";
3L	Cufflinks	exon	15478398	15478634	+	gene_id "XLOC_098465"; transcript_id "TCONS_00516571"; exon_number "1"; gene_type "lincRNA";
3L	Cufflinks	exon	15483132	15483332	+	gene_id "XLOC_098472"; transcript_id "TCONS_00448495"; exon_number "1"; gene_type "lincRNA";
3L	Cufflinks	exon	15490485	15490696	+	gene_id "XLOC_098483"; transcript_id "TCONS_00448502"; exon_number "1"; gene_type "lincRNA";
3L	Cufflinks	exon	15643824	15644030	+	gene_id "XLOC_098579"; transcript_id "TCONS_00448575"; exon_number "1"; gene_type "intronic_lncRNA";
3L	Cufflinks	exon	15766122	15766329	+	gene_id "XLOC_098747"; transcript_id "TCONS_00420757"; exon_number "1"; gene_type "lincRNA";
3L	Cufflinks	exon	16012320	16012529	+	gene_id "XLOC_098904"; transcript_id "TCONS_00516723"; exon_number "1"; gene_type "lincRNA";
3L	Cufflinks	exon	16018587	16018803	+	gene_id "XLOC_098915"; transcript_id "TCONS_00474734"; exon_number "1"; gene_type "lincRNA";
3L	Cufflinks	exon	16245012	16245220	+	gene_id "XLOC_099075"; transcript_id "TCONS_00556569"; exon_number "1"; gene_type "lincRNA";
3L	Cufflinks	exon	16535250	16535477	+	gene_id "XLOC_099270"; transcript_id "TCONS_00421079"; exon_number "1"; gene_type "intronic_lncRNA";
3L	Scripture	exon	16653040	16654034	+	gene_id "XLOC_099333"; transcript_id "TCONS_00594481"; exon_number "1"; gene_type "intronic_lncRNA";
3L	Scripture	exon	16656646	16659007	+	gene_id "XLOC_099334"; transcript_id "TCONS_00611097"; exon_number "1"; gene_type "intronic_lncRNA";
3L	Cufflinks	exon	16707868	16708067	+	gene_id "XLOC_099362"; transcript_id "TCONS_00421129"; exon_number "1"; gene_type "intronic_lncRNA";
3L	Cufflinks	exon	17447667	17447875	+	gene_id "XLOC_099880"; transcript_id "TCONS_00449360"; exon_number "1"; gene_type "intronic_lncRNA";
3L	Cufflinks	exon	17709072	17709277	+	gene_id "XLOC_100034"; transcript_id "TCONS_00475278"; exon_number "1"; gene_type "intronic_lncRNA";
3L	Cufflinks	exon	17914053	17914449	+	gene_id "XLOC_100197"; transcript_id "TCONS_00517195"; exon_number "1"; gene_type "lincRNA";
3L	Cufflinks	exon	17914646	17914704	+	gene_id "XLOC_100197"; transcript_id "TCONS_00517195"; exon_number "2"; gene_type "lincRNA";
3L	Cufflinks	exon	17948396	17948610	+	gene_id "XLOC_100229"; transcript_id "TCONS_00421706"; exon_number "1"; gene_type "lincRNA";
3L	Cufflinks	exon	18077597	18078107	+	gene_id "XLOC_100337"; transcript_id "TCONS_00449668"; exon_number "1"; gene_type "lincRNA";
3L	Cufflinks	exon	18081315	18081341	+	gene_id "XLOC_100337"; transcript_id "TCONS_00449668"; exon_number "2"; gene_type "lincRNA";
3L	Cufflinks	exon	18188469	18188697	+	gene_id "XLOC_100429"; transcript_id "TCONS_00449713"; exon_number "1"; gene_type "lincRNA";
3L	Cufflinks	exon	18241422	18241650	+	gene_id "XLOC_100524"; transcript_id "TCONS_00449769"; exon_number "1"; gene_type "lincRNA";
3L	Cufflinks	exon	18540292	18540496	+	gene_id "XLOC_100962"; transcript_id "TCONS_00475734"; exon_number "1"; gene_type "lincRNA";
3L	Scripture	exon	18896409	18896794	+	gene_id "XLOC_101234"; transcript_id "TCONS_00611278"; exon_number "1"; gene_type "intronic_lncRNA";
3L	Scripture	exon	18896852	18897017	+	gene_id "XLOC_101234"; transcript_id "TCONS_00611278"; exon_number "2"; gene_type "intronic_lncRNA";
3L	Cufflinks	exon	18976211	18976440	+	gene_id "XLOC_101327"; transcript_id "TCONS_00422264"; exon_number "1"; gene_type "lincRNA";
3L	Cufflinks	exon	19155581	19155784	+	gene_id "XLOC_101485"; transcript_id "TCONS_00497920"; exon_number "1"; gene_type "intronic_lncRNA";
3L	Cufflinks	exon	19186567	19186768	+	gene_id "XLOC_101526"; transcript_id "TCONS_00422348"; exon_number "1"; gene_type "intronic_lncRNA";
3L	Cufflinks	exon	19305010	19305222	+	gene_id "XLOC_101637"; transcript_id "TCONS_00450395"; exon_number "1"; gene_type "intronic_lncRNA";
3L	Scripture	exon	19989350	19989998	+	gene_id "XLOC_102031"; transcript_id "TCONS_00631041"; exon_number "1"; gene_type "anti-sense_lncRNA";
3L	Scripture	exon	19990295	19990304	+	gene_id "XLOC_102031"; transcript_id "TCONS_00631041"; exon_number "2"; gene_type "anti-sense_lncRNA";
3L	Cufflinks	exon	19989373	19989670	+	gene_id "XLOC_102031"; transcript_id "TCONS_00450634"; exon_number "1"; gene_type "anti-sense_lncRNA";
3L	Cufflinks	exon	19989769	19990791	+	gene_id "XLOC_102031"; transcript_id "TCONS_00450634"; exon_number "2"; gene_type "anti-sense_lncRNA";
3L	Cufflinks	exon	20166754	20166960	+	gene_id "XLOC_102169"; transcript_id "TCONS_00450718"; exon_number "1"; gene_type "intronic_lncRNA";
3L	Cufflinks	exon	20453225	20453516	+	gene_id "XLOC_102302"; transcript_id "TCONS_00422816"; exon_number "1"; gene_type "lincRNA";
3L	Cufflinks	exon	20453902	20454300	+	gene_id "XLOC_102302"; transcript_id "TCONS_00422816"; exon_number "2"; gene_type "lincRNA";
3L	Cufflinks	exon	20490097	20490317	+	gene_id "XLOC_102314"; transcript_id "TCONS_00450828"; exon_number "1"; gene_type "intronic_lncRNA";
3L	Cufflinks	exon	20492869	20493072	+	gene_id "XLOC_102315"; transcript_id "TCONS_00476375"; exon_number "1"; gene_type "anti-sense_lncRNA";
3L	Cufflinks	exon	20624496	20624697	+	gene_id "XLOC_102439"; transcript_id "TCONS_00476438"; exon_number "1"; gene_type "lincRNA";
3L	Cufflinks	exon	20670615	20670819	+	gene_id "XLOC_102500"; transcript_id "TCONS_00498395"; exon_number "1"; gene_type "lincRNA";
3L	Cufflinks	exon	20677908	20678108	+	gene_id "XLOC_102507"; transcript_id "TCONS_00537325"; exon_number "1"; gene_type "lincRNA";
3L	Cufflinks	exon	20919753	20919990	+	gene_id "XLOC_102706"; transcript_id "TCONS_00451132"; exon_number "1"; gene_type "lincRNA";
3L	Cufflinks	exon	20929865	20930081	+	gene_id "XLOC_102711"; transcript_id "TCONS_00423104"; exon_number "1"; gene_type "intronic_lncRNA";
3L	Cufflinks	exon	20932221	20932421	+	gene_id "XLOC_102713"; transcript_id "TCONS_00423105"; exon_number "1"; gene_type "intronic_lncRNA";
3L	Cufflinks	exon	20948955	20949157	+	gene_id "XLOC_102723"; transcript_id "TCONS_00451141"; exon_number "1"; gene_type "intronic_lncRNA";
3L	Cufflinks	exon	20971377	20971580	+	gene_id "XLOC_102749"; transcript_id "TCONS_00537461"; exon_number "1"; gene_type "anti-sense_lncRNA";
3L	Scripture	exon	21195186	21195646	+	gene_id "XLOC_102876"; transcript_id "TCONS_00616999"; exon_number "1"; gene_type "anti-sense_lncRNA";
3L	Scripture	exon	21195787	21196117	+	gene_id "XLOC_102876"; transcript_id "TCONS_00616999"; exon_number "2"; gene_type "anti-sense_lncRNA";
3L	Cufflinks	exon	21268045	21268384	+	gene_id "XLOC_102910"; transcript_id "TCONS_00451306"; exon_number "1"; gene_type "anti-sense_lncRNA";
3L	Cufflinks	exon	21268470	21268531	+	gene_id "XLOC_102910"; transcript_id "TCONS_00451306"; exon_number "2"; gene_type "anti-sense_lncRNA";
3L	Cufflinks	exon	21356211	21356442	+	gene_id "XLOC_102948"; transcript_id "TCONS_00498706"; exon_number "1"; gene_type "anti-sense_lncRNA";
3L	Cufflinks	exon	21687167	21687373	+	gene_id "XLOC_103149"; transcript_id "TCONS_00423500"; exon_number "1"; gene_type "lincRNA";
3L	Cufflinks	exon	22003930	22004156	+	gene_id "XLOC_103359"; transcript_id "TCONS_00498996"; exon_number "1"; gene_type "lincRNA";
3L	Cufflinks	exon	22012459	22012665	+	gene_id "XLOC_103375"; transcript_id "TCONS_00499003"; exon_number "1"; gene_type "lincRNA";
3L	Cufflinks	exon	22143573	22143780	+	gene_id "XLOC_103506"; transcript_id "TCONS_00477240"; exon_number "1"; gene_type "intronic_lncRNA";
3L	Cufflinks	exon	22479533	22479734	+	gene_id "XLOC_103724"; transcript_id "TCONS_00424012"; exon_number "1"; gene_type "lincRNA";
3L	Cufflinks	exon	23149530	23150329	+	gene_id "XLOC_104224"; transcript_id "TCONS_00424441"; exon_number "1"; gene_type "anti-sense_lncRNA";
3L	Cufflinks	exon	23150453	23150547	+	gene_id "XLOC_104224"; transcript_id "TCONS_00424441"; exon_number "2"; gene_type "anti-sense_lncRNA";
3L	Cufflinks	exon	23315195	23315897	+	gene_id "XLOC_104271"; transcript_id "TCONS_00538488"; exon_number "1"; gene_type "lincRNA";
3L	Cufflinks	exon	23315967	23316051	+	gene_id "XLOC_104271"; transcript_id "TCONS_00538488"; exon_number "2"; gene_type "lincRNA";
3L	Cufflinks	exon	23397715	23397917	+	gene_id "XLOC_104301"; transcript_id "TCONS_00424537"; exon_number "1"; gene_type "lincRNA";
3L	Cufflinks	exon	23427955	23428156	+	gene_id "XLOC_104335"; transcript_id "TCONS_00499657"; exon_number "1"; gene_type "lincRNA";
3L	Cufflinks	exon	24388341	24388546	+	gene_id "XLOC_104748"; transcript_id "TCONS_00478177"; exon_number "1"; gene_type "intronic_lncRNA";
3L	Cufflinks	exon	24648875	24649085	+	gene_id "XLOC_104896"; transcript_id "TCONS_00500019"; exon_number "1"; gene_type "lincRNA";
3L	Cufflinks	exon	24729495	24729701	+	gene_id "XLOC_104956"; transcript_id "TCONS_00538898"; exon_number "1"; gene_type "intronic_lncRNA";
3L	Cufflinks	exon	25200320	25200472	+	gene_id "XLOC_105149"; transcript_id "TCONS_00453057"; exon_number "1"; gene_type "lincRNA";
3L	Cufflinks	exon	25200536	25200992	+	gene_id "XLOC_105149"; transcript_id "TCONS_00453057"; exon_number "2"; gene_type "lincRNA";
3L	Cufflinks	exon	25380907	25381131	+	gene_id "XLOC_105239"; transcript_id "TCONS_00453112"; exon_number "1"; gene_type "intronic_lncRNA";
3L	Cufflinks	exon	25671163	25671188	+	gene_id "XLOC_105392"; transcript_id "TCONS_00478527"; exon_number "1"; gene_type "lincRNA";
3L	Cufflinks	exon	25708394	25708930	+	gene_id "XLOC_105392"; transcript_id "TCONS_00478527"; exon_number "2"; gene_type "lincRNA";
3L	Cufflinks	exon	25673583	25673685	+	gene_id "XLOC_105392"; transcript_id "TCONS_00478530"; exon_number "1"; gene_type "lincRNA";
3L	Cufflinks	exon	25673744	25673943	+	gene_id "XLOC_105392"; transcript_id "TCONS_00478530"; exon_number "2"; gene_type "lincRNA";
3L	Cufflinks	exon	25708517	25708572	+	gene_id "XLOC_105392"; transcript_id "TCONS_00500406"; exon_number "1"; gene_type "lincRNA";
3L	Cufflinks	exon	25708624	25708978	+	gene_id "XLOC_105392"; transcript_id "TCONS_00500406"; exon_number "2"; gene_type "lincRNA";
3L	Cufflinks	exon	25709037	25709408	+	gene_id "XLOC_105392"; transcript_id "TCONS_00500406"; exon_number "3"; gene_type "lincRNA";
3L	Cufflinks	exon	26277782	26277983	+	gene_id "XLOC_105583"; transcript_id "TCONS_00453321"; exon_number "1"; gene_type "lincRNA";
3L	Cufflinks	exon	26564918	26565123	+	gene_id "XLOC_105747"; transcript_id "TCONS_00539486"; exon_number "1"; gene_type "lincRNA";
3L	Cufflinks	exon	26566323	26566578	+	gene_id "XLOC_105748"; transcript_id "TCONS_00453416"; exon_number "1"; gene_type "lincRNA";
3L	Cufflinks	exon	26662733	26664070	+	gene_id "XLOC_105769"; transcript_id "TCONS_00560115"; exon_number "1"; gene_type "lincRNA";
3L	Cufflinks	exon	26695186	26695262	+	gene_id "XLOC_105769"; transcript_id "TCONS_00560115"; exon_number "2"; gene_type "lincRNA";
3L	Cufflinks	exon	26694703	26694909	+	gene_id "XLOC_105777"; transcript_id "TCONS_00539519"; exon_number "1"; gene_type "lincRNA";
3L	Cufflinks	exon	26819147	26819347	+	gene_id "XLOC_105842"; transcript_id "TCONS_00539599"; exon_number "1"; gene_type "lincRNA";
3L	Cufflinks	exon	28059797	28060553	+	gene_id "XLOC_106174"; transcript_id "TCONS_00479043"; exon_number "1"; gene_type "lincRNA";
3L	Cufflinks	exon	28076528	28077430	+	gene_id "XLOC_106174"; transcript_id "TCONS_00479043"; exon_number "2"; gene_type "lincRNA";
3L	Cufflinks	exon	110203	110260	-	gene_id "XLOC_106247"; transcript_id "TCONS_00426177"; exon_number "1"; gene_type "lincRNA";
3L	Cufflinks	exon	119375	119826	-	gene_id "XLOC_106247"; transcript_id "TCONS_00426177"; exon_number "2"; gene_type "lincRNA";
3L	Cufflinks	exon	122016	122215	-	gene_id "XLOC_106250"; transcript_id "TCONS_00426183"; exon_number "1"; gene_type "lincRNA";
3L	Cufflinks	exon	296791	296997	-	gene_id "XLOC_106314"; transcript_id "TCONS_00426238"; exon_number "1"; gene_type "intronic_lncRNA";
3L	Cufflinks	exon	557328	557566	-	gene_id "XLOC_106404"; transcript_id "TCONS_00426289"; exon_number "1"; gene_type "intronic_lncRNA";
3L	Cufflinks	exon	588493	588712	-	gene_id "XLOC_106418"; transcript_id "TCONS_00501049"; exon_number "1"; gene_type "intronic_lncRNA";
3L	Cufflinks	exon	1184220	1184425	-	gene_id "XLOC_106991"; transcript_id "TCONS_00501331"; exon_number "1"; gene_type "lincRNA";
3L	Cufflinks	exon	1482011	1482250	-	gene_id "XLOC_107292"; transcript_id "TCONS_00454525"; exon_number "1"; gene_type "intronic_lncRNA";
3L	Cufflinks	exon	1565640	1565999	-	gene_id "XLOC_107309"; transcript_id "TCONS_00479739"; exon_number "1"; gene_type "anti-sense_lncRNA";
3L	Cufflinks	exon	1711543	1711748	-	gene_id "XLOC_107416"; transcript_id "TCONS_00426870"; exon_number "1"; gene_type "intronic_lncRNA";
3L	Cufflinks	exon	1796902	1797385	-	gene_id "XLOC_107428"; transcript_id "TCONS_00454621"; exon_number "1"; gene_type "anti-sense_lncRNA";
3L	Cufflinks	exon	1974468	1974691	-	gene_id "XLOC_107577"; transcript_id "TCONS_00521060"; exon_number "1"; gene_type "lincRNA";
3L	Cufflinks	exon	1993779	1993989	-	gene_id "XLOC_107615"; transcript_id "TCONS_00454736"; exon_number "1"; gene_type "lincRNA";
3L	Cufflinks	exon	2299255	2299492	-	gene_id "XLOC_107864"; transcript_id "TCONS_00454932"; exon_number "1"; gene_type "anti-sense_lncRNA";
3L	Cufflinks	exon	2385521	2385760	-	gene_id "XLOC_107963"; transcript_id "TCONS_00501758"; exon_number "1"; gene_type "intronic_lncRNA";
3L	Cufflinks	exon	2386529	2386732	-	gene_id "XLOC_107964"; transcript_id "TCONS_00521221"; exon_number "1"; gene_type "intronic_lncRNA";
3L	Cufflinks	exon	2462837	2463052	-	gene_id "XLOC_108011"; transcript_id "TCONS_00427268"; exon_number "1"; gene_type "intronic_lncRNA";
3L	Cufflinks	exon	2765495	2765717	-	gene_id "XLOC_108182"; transcript_id "TCONS_00427396"; exon_number "1"; gene_type "intronic_lncRNA";
3L	Cufflinks	exon	2848693	2848896	-	gene_id "XLOC_108244"; transcript_id "TCONS_00427467"; exon_number "1"; gene_type "intronic_lncRNA";
3L	Cufflinks	exon	2956850	2957057	-	gene_id "XLOC_108369"; transcript_id "TCONS_00480301"; exon_number "1"; gene_type "intronic_lncRNA";
3L	Cufflinks	exon	3005540	3005739	-	gene_id "XLOC_108436"; transcript_id "TCONS_00455282"; exon_number "1"; gene_type "intronic_lncRNA";
3L	Cufflinks	exon	3240259	3240468	-	gene_id "XLOC_108554"; transcript_id "TCONS_00455354"; exon_number "1"; gene_type "lincRNA";
3L	Cufflinks	exon	3412028	3412285	-	gene_id "XLOC_108693"; transcript_id "TCONS_00541090"; exon_number "1"; gene_type "intronic_lncRNA";
3L	Cufflinks	exon	3501710	3501910	-	gene_id "XLOC_108755"; transcript_id "TCONS_00455464"; exon_number "1"; gene_type "intronic_lncRNA";
3L	Cufflinks	exon	3661258	3661482	-	gene_id "XLOC_108871"; transcript_id "TCONS_00541168"; exon_number "1"; gene_type "lincRNA";
3L	Scripture	exon	3813117	3813165	-	gene_id "XLOC_108960"; transcript_id "TCONS_00597106"; exon_number "1"; gene_type "anti-sense_lncRNA";
3L	Scripture	exon	3813261	3813437	-	gene_id "XLOC_108960"; transcript_id "TCONS_00597106"; exon_number "2"; gene_type "anti-sense_lncRNA";
3L	Cufflinks	exon	3828695	3828899	-	gene_id "XLOC_108968"; transcript_id "TCONS_00427863"; exon_number "1"; gene_type "intronic_lncRNA";
3L	Cufflinks	exon	3830381	3830587	-	gene_id "XLOC_108969"; transcript_id "TCONS_00480572"; exon_number "1"; gene_type "intronic_lncRNA";
3L	Cufflinks	exon	3888843	3889045	-	gene_id "XLOC_109044"; transcript_id "TCONS_00480602"; exon_number "1"; gene_type "lincRNA";
3L	Cufflinks	exon	3892867	3893332	-	gene_id "XLOC_109049"; transcript_id "TCONS_00427904"; exon_number "1"; gene_type "anti-sense_lncRNA";
3L	Cufflinks	exon	4274562	4274782	-	gene_id "XLOC_109296"; transcript_id "TCONS_00502388"; exon_number "1"; gene_type "anti-sense_lncRNA";
3L	Cufflinks	exon	4531096	4531325	-	gene_id "XLOC_109513"; transcript_id "TCONS_00480852"; exon_number "1"; gene_type "intronic_lncRNA";
3L	Cufflinks	exon	4741410	4741642	-	gene_id "XLOC_109670"; transcript_id "TCONS_00502528"; exon_number "1"; gene_type "intronic_lncRNA";
3L	Cufflinks	exon	4987586	4987790	-	gene_id "XLOC_109945"; transcript_id "TCONS_00456159"; exon_number "1"; gene_type "intronic_lncRNA";
3L	Cufflinks	exon	5285075	5285283	-	gene_id "XLOC_110162"; transcript_id "TCONS_00428546"; exon_number "1"; gene_type "lincRNA";
3L	Cufflinks	exon	5388489	5388720	-	gene_id "XLOC_110305"; transcript_id "TCONS_00428609"; exon_number "1"; gene_type "lincRNA";
3L	Cufflinks	exon	5641211	5641416	-	gene_id "XLOC_110585"; transcript_id "TCONS_00456580"; exon_number "1"; gene_type "intronic_lncRNA";
3L	Cufflinks	exon	5664590	5664791	-	gene_id "XLOC_110607"; transcript_id "TCONS_00541918"; exon_number "1"; gene_type "intronic_lncRNA";
3L	Cufflinks	exon	5724294	5724505	-	gene_id "XLOC_110661"; transcript_id "TCONS_00456613"; exon_number "1"; gene_type "intronic_lncRNA";
3L	Cufflinks	exon	5735496	5735696	-	gene_id "XLOC_110668"; transcript_id "TCONS_00481350"; exon_number "1"; gene_type "intronic_lncRNA";
3L	Cufflinks	exon	5876377	5876583	-	gene_id "XLOC_110780"; transcript_id "TCONS_00456672"; exon_number "1"; gene_type "lincRNA";
3L	Cufflinks	exon	5891896	5892104	-	gene_id "XLOC_110802"; transcript_id "TCONS_00456692"; exon_number "1"; gene_type "lincRNA";
3L	Cufflinks	exon	6161494	6161717	-	gene_id "XLOC_111102"; transcript_id "TCONS_00456868"; exon_number "1"; gene_type "anti-sense_lncRNA";
3L	Cufflinks	exon	6364117	6364322	-	gene_id "XLOC_111262"; transcript_id "TCONS_00456993"; exon_number "1"; gene_type "lincRNA";
3L	Cufflinks	exon	6391759	6392007	-	gene_id "XLOC_111306"; transcript_id "TCONS_00429187"; exon_number "1"; gene_type "lincRNA";
3L	Cufflinks	exon	6837068	6837271	-	gene_id "XLOC_111694"; transcript_id "TCONS_00503408"; exon_number "1"; gene_type "lincRNA";
3L	Cufflinks	exon	6984673	6984877	-	gene_id "XLOC_111875"; transcript_id "TCONS_00457373"; exon_number "1"; gene_type "lincRNA";
3L	Cufflinks	exon	7169800	7170011	-	gene_id "XLOC_112044"; transcript_id "TCONS_00457468"; exon_number "1"; gene_type "intronic_lncRNA";
3L	Cufflinks	exon	7218584	7218799	-	gene_id "XLOC_112121"; transcript_id "TCONS_00503590"; exon_number "1"; gene_type "lincRNA";
3L	Cufflinks	exon	7562262	7562482	-	gene_id "XLOC_112458"; transcript_id "TCONS_00457721"; exon_number "1"; gene_type "lincRNA";
3L	Cufflinks	exon	7831846	7832402	-	gene_id "XLOC_112603"; transcript_id "TCONS_00429962"; exon_number "1"; gene_type "intronic_lncRNA";
3L	Cufflinks	exon	7864733	7865477	-	gene_id "XLOC_112603"; transcript_id "TCONS_00457855"; exon_number "1"; gene_type "intronic_lncRNA";
3L	Cufflinks	exon	7793406	7793693	-	gene_id "XLOC_112621"; transcript_id "TCONS_00429931"; exon_number "1"; gene_type "intronic_lncRNA";
3L	Cufflinks	exon	7874660	7874870	-	gene_id "XLOC_112666"; transcript_id "TCONS_00457856"; exon_number "1"; gene_type "intronic_lncRNA";
3L	Cufflinks	exon	8226234	8226489	-	gene_id "XLOC_112870"; transcript_id "TCONS_00457963"; exon_number "1"; gene_type "lincRNA";
3L	Cufflinks	exon	8280645	8280849	-	gene_id "XLOC_112938"; transcript_id "TCONS_00457982"; exon_number "1"; gene_type "anti-sense_lncRNA";
3L	Scripture	exon	8339876	8340171	-	gene_id "XLOC_112986"; transcript_id "TCONS_00583802"; exon_number "1"; gene_type "anti-sense_lncRNA";
3L	Scripture	exon	8340347	8340426	-	gene_id "XLOC_112986"; transcript_id "TCONS_00583802"; exon_number "2"; gene_type "anti-sense_lncRNA";
3L	Scripture	exon	8339876	8340171	-	gene_id "XLOC_112986"; transcript_id "TCONS_00563304"; exon_number "1"; gene_type "anti-sense_lncRNA";
3L	Scripture	exon	8340351	8340426	-	gene_id "XLOC_112986"; transcript_id "TCONS_00563304"; exon_number "2"; gene_type "anti-sense_lncRNA";
3L	Cufflinks	exon	8589280	8589498	-	gene_id "XLOC_113137"; transcript_id "TCONS_00458079"; exon_number "1"; gene_type "intronic_lncRNA";
3L	Cufflinks	exon	8727960	8728730	-	gene_id "XLOC_113215"; transcript_id "TCONS_00543099"; exon_number "1"; gene_type "anti-sense_lncRNA";
3L	Cufflinks	exon	8865721	8865929	-	gene_id "XLOC_113301"; transcript_id "TCONS_00430351"; exon_number "1"; gene_type "intronic_lncRNA";
3L	Cufflinks	exon	9036318	9036526	-	gene_id "XLOC_113388"; transcript_id "TCONS_00504191"; exon_number "1"; gene_type "lincRNA";
3L	Scripture	exon	9094722	9095113	-	gene_id "XLOC_113403"; transcript_id "TCONS_00458278"; exon_number "1"; gene_type "anti-sense_lncRNA";
3L	Scripture	exon	9095192	9095345	-	gene_id "XLOC_113403"; transcript_id "TCONS_00458278"; exon_number "2"; gene_type "anti-sense_lncRNA";
3L	Scripture	exon	9094722	9095116	-	gene_id "XLOC_113403"; transcript_id "TCONS_00458277"; exon_number "1"; gene_type "anti-sense_lncRNA";
3L	Scripture	exon	9095192	9095345	-	gene_id "XLOC_113403"; transcript_id "TCONS_00458277"; exon_number "2"; gene_type "anti-sense_lncRNA";
3L	Scripture	exon	9094722	9095116	-	gene_id "XLOC_113403"; transcript_id "TCONS_00430449"; exon_number "1"; gene_type "anti-sense_lncRNA";
3L	Scripture	exon	9095192	9095291	-	gene_id "XLOC_113403"; transcript_id "TCONS_00430449"; exon_number "2"; gene_type "anti-sense_lncRNA";
3L	Scripture	exon	9095398	9095473	-	gene_id "XLOC_113403"; transcript_id "TCONS_00430449"; exon_number "3"; gene_type "anti-sense_lncRNA";
3L	Cufflinks	exon	9094757	9095113	-	gene_id "XLOC_113403"; transcript_id "TCONS_00430450"; exon_number "1"; gene_type "anti-sense_lncRNA";
3L	Cufflinks	exon	9095192	9095291	-	gene_id "XLOC_113403"; transcript_id "TCONS_00430450"; exon_number "2"; gene_type "anti-sense_lncRNA";
3L	Cufflinks	exon	9095398	9096255	-	gene_id "XLOC_113403"; transcript_id "TCONS_00430450"; exon_number "3"; gene_type "anti-sense_lncRNA";
3L	Cufflinks	exon	9173335	9173542	-	gene_id "XLOC_113442"; transcript_id "TCONS_00458319"; exon_number "1"; gene_type "intronic_lncRNA";
3L	Cufflinks	exon	9253919	9254119	-	gene_id "XLOC_113558"; transcript_id "TCONS_00523258"; exon_number "1"; gene_type "intronic_lncRNA";
3L	Cufflinks	exon	9289282	9289516	-	gene_id "XLOC_113590"; transcript_id "TCONS_00482806"; exon_number "1"; gene_type "lincRNA";
3L	Cufflinks	exon	9290969	9291187	-	gene_id "XLOC_113593"; transcript_id "TCONS_00458418"; exon_number "1"; gene_type "lincRNA";
3L	Cufflinks	exon	9339089	9339290	-	gene_id "XLOC_113679"; transcript_id "TCONS_00482839"; exon_number "1"; gene_type "intronic_lncRNA";
3L	Cufflinks	exon	9583290	9583527	-	gene_id "XLOC_113804"; transcript_id "TCONS_00430685"; exon_number "1"; gene_type "intronic_lncRNA";
3L	Cufflinks	exon	9584155	9584359	-	gene_id "XLOC_113805"; transcript_id "TCONS_00563655"; exon_number "1"; gene_type "intronic_lncRNA";
3L	Cufflinks	exon	10048153	10048393	-	gene_id "XLOC_114084"; transcript_id "TCONS_00458649"; exon_number "1"; gene_type "intronic_lncRNA";
3L	Cufflinks	exon	10107542	10107764	-	gene_id "XLOC_114141"; transcript_id "TCONS_00458678"; exon_number "1"; gene_type "intronic_lncRNA";
3L	Cufflinks	exon	10230317	10230518	-	gene_id "XLOC_114315"; transcript_id "TCONS_00483121"; exon_number "1"; gene_type "lincRNA";
3L	Cufflinks	exon	10278305	10278508	-	gene_id "XLOC_114386"; transcript_id "TCONS_00430999"; exon_number "1"; gene_type "lincRNA";
3L	Cufflinks	exon	10421489	10421690	-	gene_id "XLOC_114581"; transcript_id "TCONS_00543696"; exon_number "1"; gene_type "lincRNA";
3L	Cufflinks	exon	10448359	10448560	-	gene_id "XLOC_114633"; transcript_id "TCONS_00459014"; exon_number "1"; gene_type "lincRNA";
3L	Cufflinks	exon	10465390	10465590	-	gene_id "XLOC_114658"; transcript_id "TCONS_00459029"; exon_number "1"; gene_type "anti-sense_lncRNA";
3L	Cufflinks	exon	10506731	10506987	-	gene_id "XLOC_114658"; transcript_id "TCONS_00459029"; exon_number "2"; gene_type "anti-sense_lncRNA";
3L	Cufflinks	exon	10734992	10735192	-	gene_id "XLOC_114943"; transcript_id "TCONS_00431261"; exon_number "1"; gene_type "lincRNA";
3L	Cufflinks	exon	10962313	10962515	-	gene_id "XLOC_115282"; transcript_id "TCONS_00431422"; exon_number "1"; gene_type "lincRNA";
3L	Cufflinks	exon	11163852	11164238	-	gene_id "XLOC_115416"; transcript_id "TCONS_00523822"; exon_number "1"; gene_type "anti-sense_lncRNA";
3L	Cufflinks	exon	11273467	11273692	-	gene_id "XLOC_115471"; transcript_id "TCONS_00431572"; exon_number "1"; gene_type "lincRNA";
3L	Scripture	exon	11349428	11349840	-	gene_id "XLOC_115569"; transcript_id "TCONS_00505067"; exon_number "1"; gene_type "lincRNA";
3L	Scripture	exon	11351399	11351478	-	gene_id "XLOC_115569"; transcript_id "TCONS_00505067"; exon_number "2"; gene_type "lincRNA";
3L	Cufflinks	exon	11515438	11515638	-	gene_id "XLOC_115820"; transcript_id "TCONS_00431743"; exon_number "1"; gene_type "intronic_lncRNA";
3L	Cufflinks	exon	11908790	11908997	-	gene_id "XLOC_116150"; transcript_id "TCONS_00459920"; exon_number "1"; gene_type "intronic_lncRNA";
3L	Cufflinks	exon	12111354	12111553	-	gene_id "XLOC_116307"; transcript_id "TCONS_00460038"; exon_number "1"; gene_type "lincRNA";
3L	Cufflinks	exon	12132455	12133035	-	gene_id "XLOC_116328"; transcript_id "TCONS_00432099"; exon_number "1"; gene_type "anti-sense_lncRNA";
3L	Cufflinks	exon	12133304	12133604	-	gene_id "XLOC_116328"; transcript_id "TCONS_00432099"; exon_number "2"; gene_type "anti-sense_lncRNA";
3L	Cufflinks	exon	12299964	12300172	-	gene_id "XLOC_116420"; transcript_id "TCONS_00484109"; exon_number "1"; gene_type "lincRNA";
3L	Cufflinks	exon	12333119	12333325	-	gene_id "XLOC_116471"; transcript_id "TCONS_00460150"; exon_number "1"; gene_type "intronic_lncRNA";
3L	Cufflinks	exon	12407436	12407720	-	gene_id "XLOC_116525"; transcript_id "TCONS_00505522"; exon_number "1"; gene_type "intronic_lncRNA";
3L	Cufflinks	exon	12481201	12481413	-	gene_id "XLOC_116597"; transcript_id "TCONS_00505567"; exon_number "1"; gene_type "intronic_lncRNA";
3L	Cufflinks	exon	12575833	12576045	-	gene_id "XLOC_116619"; transcript_id "TCONS_00432296"; exon_number "1"; gene_type "lincRNA";
3L	Cufflinks	exon	12806337	12806337	-	gene_id "XLOC_116859"; transcript_id "TCONS_00505678"; exon_number "1"; gene_type "anti-sense_lncRNA";
3L	Cufflinks	exon	12806853	12808606	-	gene_id "XLOC_116859"; transcript_id "TCONS_00505678"; exon_number "2"; gene_type "anti-sense_lncRNA";
3L	Cufflinks	exon	12848096	12848313	-	gene_id "XLOC_116867"; transcript_id "TCONS_00432415"; exon_number "1"; gene_type "intronic_lncRNA";
3L	Cufflinks	exon	13198195	13198406	-	gene_id "XLOC_117324"; transcript_id "TCONS_00505900"; exon_number "1"; gene_type "lincRNA";
3L	Cufflinks	exon	13207816	13208023	-	gene_id "XLOC_117344"; transcript_id "TCONS_00544914"; exon_number "1"; gene_type "lincRNA";
3L	Cufflinks	exon	13232519	13232720	-	gene_id "XLOC_117377"; transcript_id "TCONS_00544931"; exon_number "1"; gene_type "intronic_lncRNA";
3L	Cufflinks	exon	13453239	13453442	-	gene_id "XLOC_117622"; transcript_id "TCONS_00524644"; exon_number "1"; gene_type "intronic_lncRNA";
3L	Cufflinks	exon	13500532	13500733	-	gene_id "XLOC_117650"; transcript_id "TCONS_00484671"; exon_number "1"; gene_type "intronic_lncRNA";
3L	Cufflinks	exon	13610031	13610248	-	gene_id "XLOC_117735"; transcript_id "TCONS_00432965"; exon_number "1"; gene_type "intronic_lncRNA";
3L	Cufflinks	exon	13786414	13786637	-	gene_id "XLOC_118002"; transcript_id "TCONS_00461261"; exon_number "1"; gene_type "intronic_lncRNA";
3L	Cufflinks	exon	13944262	13944469	-	gene_id "XLOC_118104"; transcript_id "TCONS_00524881"; exon_number "1"; gene_type "intronic_lncRNA";
3L	Cufflinks	exon	13947147	13947376	-	gene_id "XLOC_118108"; transcript_id "TCONS_00484933"; exon_number "1"; gene_type "intronic_lncRNA";
3L	Cufflinks	exon	14036723	14036924	-	gene_id "XLOC_118143"; transcript_id "TCONS_00506348"; exon_number "1"; gene_type "anti-sense_lncRNA";
3L	Cufflinks	exon	14256901	14257100	-	gene_id "XLOC_118356"; transcript_id "TCONS_00485049"; exon_number "1"; gene_type "lincRNA";
3L	Cufflinks	exon	14530977	14531197	-	gene_id "XLOC_118535"; transcript_id "TCONS_00525028"; exon_number "1"; gene_type "intronic_lncRNA";
3L	Cufflinks	exon	14570484	14570688	-	gene_id "XLOC_118567"; transcript_id "TCONS_00461636"; exon_number "1"; gene_type "lincRNA";
3L	Cufflinks	exon	14613211	14613350	-	gene_id "XLOC_118627"; transcript_id "TCONS_00461690"; exon_number "1"; gene_type "lincRNA";
3L	Cufflinks	exon	14613409	14613623	-	gene_id "XLOC_118627"; transcript_id "TCONS_00461690"; exon_number "2"; gene_type "lincRNA";
3L	Cufflinks	exon	14684993	14685193	-	gene_id "XLOC_118666"; transcript_id "TCONS_00506577"; exon_number "1"; gene_type "anti-sense_lncRNA";
3L	Cufflinks	exon	14839909	14840132	-	gene_id "XLOC_118740"; transcript_id "TCONS_00461726"; exon_number "1"; gene_type "intronic_lncRNA";
3L	Cufflinks	exon	14967302	14967543	-	gene_id "XLOC_118872"; transcript_id "TCONS_00461810"; exon_number "1"; gene_type "lincRNA";
3L	Scripture	exon	15097715	15098787	-	gene_id "XLOC_118990"; transcript_id "TCONS_00598661"; exon_number "1"; gene_type "anti-sense_lncRNA";
3L	Scripture	exon	15098844	15098865	-	gene_id "XLOC_118990"; transcript_id "TCONS_00598661"; exon_number "2"; gene_type "anti-sense_lncRNA";
3L	Scripture	exon	15099261	15099340	-	gene_id "XLOC_118990"; transcript_id "TCONS_00598661"; exon_number "3"; gene_type "anti-sense_lncRNA";
3L	Cufflinks	exon	15319294	15319497	-	gene_id "XLOC_119226"; transcript_id "TCONS_00462023"; exon_number "1"; gene_type "lincRNA";
3L	Cufflinks	exon	15395032	15395238	-	gene_id "XLOC_119340"; transcript_id "TCONS_00433988"; exon_number "1"; gene_type "lincRNA";
3L	Cufflinks	exon	15396755	15396973	-	gene_id "XLOC_119345"; transcript_id "TCONS_00433989"; exon_number "1"; gene_type "lincRNA";
3L	Cufflinks	exon	15418074	15418273	-	gene_id "XLOC_119380"; transcript_id "TCONS_00434007"; exon_number "1"; gene_type "lincRNA";
3L	Cufflinks	exon	15538989	15539387	-	gene_id "XLOC_119540"; transcript_id "TCONS_00462230"; exon_number "1"; gene_type "intronic_lncRNA";
3L	Cufflinks	exon	15539486	15539743	-	gene_id "XLOC_119540"; transcript_id "TCONS_00462230"; exon_number "2"; gene_type "intronic_lncRNA";
3L	Cufflinks	exon	15624460	15624663	-	gene_id "XLOC_119575"; transcript_id "TCONS_00525381"; exon_number "1"; gene_type "intronic_lncRNA";
3L	Cufflinks	exon	15735577	15735786	-	gene_id "XLOC_119709"; transcript_id "TCONS_00434225"; exon_number "1"; gene_type "lincRNA";
3L	Cufflinks	exon	16144942	16145218	-	gene_id "XLOC_120008"; transcript_id "TCONS_00462534"; exon_number "1"; gene_type "intronic_lncRNA";
3L	Cufflinks	exon	16216211	16216421	-	gene_id "XLOC_120093"; transcript_id "TCONS_00485868"; exon_number "1"; gene_type "intronic_lncRNA";
3L	Cufflinks	exon	16530661	16530919	-	gene_id "XLOC_120328"; transcript_id "TCONS_00462752"; exon_number "1"; gene_type "intronic_lncRNA";
3L	Cufflinks	exon	16831417	16831620	-	gene_id "XLOC_120488"; transcript_id "TCONS_00507445"; exon_number "1"; gene_type "lincRNA";
3L	Cufflinks	exon	16987219	16987421	-	gene_id "XLOC_120586"; transcript_id "TCONS_00525828"; exon_number "1"; gene_type "intronic_lncRNA";
3L	Cufflinks	exon	18029613	18029836	-	gene_id "XLOC_121417"; transcript_id "TCONS_00463438"; exon_number "1"; gene_type "intronic_lncRNA";
3L	Cufflinks	exon	18250931	18251140	-	gene_id "XLOC_121666"; transcript_id "TCONS_00463600"; exon_number "1"; gene_type "lincRNA";
3L	Cufflinks	exon	18347809	18348013	-	gene_id "XLOC_121829"; transcript_id "TCONS_00463701"; exon_number "1"; gene_type "lincRNA";
3L	Cufflinks	exon	18952427	18952632	-	gene_id "XLOC_122417"; transcript_id "TCONS_00508369"; exon_number "1"; gene_type "intronic_lncRNA";
3L	Cufflinks	exon	19221348	19221549	-	gene_id "XLOC_122645"; transcript_id "TCONS_00487287"; exon_number "1"; gene_type "intronic_lncRNA";
3L	Cufflinks	exon	19394600	19394799	-	gene_id "XLOC_122819"; transcript_id "TCONS_00464424"; exon_number "1"; gene_type "intronic_lncRNA";
3L	Cufflinks	exon	19511172	19511378	-	gene_id "XLOC_122872"; transcript_id "TCONS_00436307"; exon_number "1"; gene_type "lincRNA";
3L	Cufflinks	exon	19580593	19580794	-	gene_id "XLOC_122949"; transcript_id "TCONS_00436355"; exon_number "1"; gene_type "intronic_lncRNA";
3L	Scripture	exon	20023953	20024059	-	gene_id "XLOC_123129"; transcript_id "TCONS_00614000"; exon_number "1"; gene_type "anti-sense_lncRNA";
3L	Scripture	exon	20024124	20024287	-	gene_id "XLOC_123129"; transcript_id "TCONS_00614000"; exon_number "2"; gene_type "anti-sense_lncRNA";
3L	Cufflinks	exon	20091955	20092159	-	gene_id "XLOC_123216"; transcript_id "TCONS_00526951"; exon_number "1"; gene_type "lincRNA";
3L	Scripture	exon	20315398	20315538	-	gene_id "XLOC_123324"; transcript_id "TCONS_00599310"; exon_number "1"; gene_type "anti-sense_lncRNA";
3L	Scripture	exon	20316891	20317416	-	gene_id "XLOC_123324"; transcript_id "TCONS_00599310"; exon_number "2"; gene_type "anti-sense_lncRNA";
3L	Scripture	exon	20390268	20390435	-	gene_id "XLOC_123339"; transcript_id "TCONS_00607702"; exon_number "1"; gene_type "anti-sense_lncRNA";
3L	Scripture	exon	20390500	20390634	-	gene_id "XLOC_123339"; transcript_id "TCONS_00607702"; exon_number "2"; gene_type "anti-sense_lncRNA";
3L	Cufflinks	exon	20415172	20415375	-	gene_id "XLOC_123350"; transcript_id "TCONS_00436690"; exon_number "1"; gene_type "intronic_lncRNA";
3L	Cufflinks	exon	20442187	20442386	-	gene_id "XLOC_123365"; transcript_id "TCONS_00464789"; exon_number "1"; gene_type "lincRNA";
3L	Cufflinks	exon	20740589	20740811	-	gene_id "XLOC_123636"; transcript_id "TCONS_00548007"; exon_number "1"; gene_type "intronic_lncRNA";
3L	Cufflinks	exon	20795174	20795369	-	gene_id "XLOC_123676"; transcript_id "TCONS_00487912"; exon_number "1"; gene_type "lincRNA";
3L	Cufflinks	exon	20795452	20795521	-	gene_id "XLOC_123676"; transcript_id "TCONS_00487912"; exon_number "2"; gene_type "lincRNA";
3L	Cufflinks	exon	20853695	20853902	-	gene_id "XLOC_123692"; transcript_id "TCONS_00527173"; exon_number "1"; gene_type "intronic_lncRNA";
3L	Cufflinks	exon	20921382	20921479	-	gene_id "XLOC_123796"; transcript_id "TCONS_00437045"; exon_number "1"; gene_type "lincRNA";
3L	Cufflinks	exon	20921569	20921806	-	gene_id "XLOC_123796"; transcript_id "TCONS_00437045"; exon_number "2"; gene_type "lincRNA";
3L	Cufflinks	exon	21238232	21238436	-	gene_id "XLOC_124031"; transcript_id "TCONS_00465277"; exon_number "1"; gene_type "intronic_lncRNA";
3L	Cufflinks	exon	21401727	21401950	-	gene_id "XLOC_124135"; transcript_id "TCONS_00568311"; exon_number "1"; gene_type "intronic_lncRNA";
3L	Cufflinks	exon	21407317	21407522	-	gene_id "XLOC_124142"; transcript_id "TCONS_00437271"; exon_number "1"; gene_type "intronic_lncRNA";
3L	Cufflinks	exon	21602427	21602629	-	gene_id "XLOC_124275"; transcript_id "TCONS_00465445"; exon_number "1"; gene_type "intronic_lncRNA";
3L	Cufflinks	exon	22011182	22011383	-	gene_id "XLOC_124621"; transcript_id "TCONS_00509535"; exon_number "1"; gene_type "lincRNA";
3L	Cufflinks	exon	22197349	22197550	-	gene_id "XLOC_124833"; transcript_id "TCONS_00509639"; exon_number "1"; gene_type "intronic_lncRNA";
3L	Cufflinks	exon	22924365	22924573	-	gene_id "XLOC_125307"; transcript_id "TCONS_00438081"; exon_number "1"; gene_type "lincRNA";
3L	Cufflinks	exon	22926021	22926223	-	gene_id "XLOC_125308"; transcript_id "TCONS_00438083"; exon_number "1"; gene_type "lincRNA";
3L	Cufflinks	exon	22982598	22982809	-	gene_id "XLOC_125377"; transcript_id "TCONS_00509998"; exon_number "1"; gene_type "lincRNA";
3L	Cufflinks	exon	23010149	23010372	-	gene_id "XLOC_125402"; transcript_id "TCONS_00488931"; exon_number "1"; gene_type "intronic_lncRNA";
3L	Cufflinks	exon	23189022	23189237	-	gene_id "XLOC_125517"; transcript_id "TCONS_00489013"; exon_number "1"; gene_type "lincRNA";
3L	Cufflinks	exon	24144969	24145201	-	gene_id "XLOC_126021"; transcript_id "TCONS_00438557"; exon_number "1"; gene_type "intronic_lncRNA";
3L	Cufflinks	exon	24674693	24674912	-	gene_id "XLOC_126259"; transcript_id "TCONS_00510490"; exon_number "1"; gene_type "lincRNA";
3L	Cufflinks	exon	24911602	24911816	-	gene_id "XLOC_126404"; transcript_id "TCONS_00510600"; exon_number "1"; gene_type "lincRNA";
3L	Cufflinks	exon	25022431	25022641	-	gene_id "XLOC_126464"; transcript_id "TCONS_00438855"; exon_number "1"; gene_type "lincRNA";
3L	Scripture	exon	25181118	25182156	-	gene_id "XLOC_126532"; transcript_id "TCONS_00599692"; exon_number "1"; gene_type "lincRNA";
3L	Cufflinks	exon	25282147	25282390	-	gene_id "XLOC_126599"; transcript_id "TCONS_00489666"; exon_number "1"; gene_type "intronic_lncRNA";
3L	Cufflinks	exon	25385773	25386014	-	gene_id "XLOC_126656"; transcript_id "TCONS_00439008"; exon_number "1"; gene_type "intronic_lncRNA";
3L	Cufflinks	exon	25610806	25611144	-	gene_id "XLOC_126816"; transcript_id "TCONS_00439055"; exon_number "1"; gene_type "intronic_lncRNA";
3L	Cufflinks	exon	25626779	25627376	-	gene_id "XLOC_126816"; transcript_id "TCONS_00439055"; exon_number "2"; gene_type "intronic_lncRNA";
3L	Cufflinks	exon	25665366	25665585	-	gene_id "XLOC_126868"; transcript_id "TCONS_00439069"; exon_number "1"; gene_type "intronic_lncRNA";
3L	Cufflinks	exon	26160812	26163035	-	gene_id "XLOC_127001"; transcript_id "TCONS_00439186"; exon_number "1"; gene_type "lincRNA";
3L	Cufflinks	exon	26163515	26163603	-	gene_id "XLOC_127001"; transcript_id "TCONS_00439186"; exon_number "2"; gene_type "lincRNA";
3L	Cufflinks	exon	26245170	26245390	-	gene_id "XLOC_127034"; transcript_id "TCONS_00549970"; exon_number "1"; gene_type "lincRNA";
3L	Cufflinks	exon	27091336	27091920	-	gene_id "XLOC_127353"; transcript_id "TCONS_00439399"; exon_number "1"; gene_type "lincRNA";
3L	Cufflinks	exon	27091976	27092347	-	gene_id "XLOC_127353"; transcript_id "TCONS_00439399"; exon_number "2"; gene_type "lincRNA";
3L	Cufflinks	exon	27680951	27681161	-	gene_id "XLOC_127510"; transcript_id "TCONS_00511053"; exon_number "1"; gene_type "lincRNA";
3R	Cufflinks	exon	451809	452082	+	gene_id "XLOC_132147"; transcript_id "TCONS_00705485"; exon_number "1"; gene_type "lincRNA";
3R	Cufflinks	exon	727338	730181	+	gene_id "XLOC_132298"; transcript_id "TCONS_00637545"; exon_number "1"; gene_type "intronic_lncRNA";
3R	Cufflinks	exon	972753	972956	+	gene_id "XLOC_132501"; transcript_id "TCONS_00705783"; exon_number "1"; gene_type "intronic_lncRNA";
3R	Cufflinks	exon	1058120	1058341	+	gene_id "XLOC_132558"; transcript_id "TCONS_00807262"; exon_number "1"; gene_type "intronic_lncRNA";
3R	Cufflinks	exon	1059989	1060192	+	gene_id "XLOC_132562"; transcript_id "TCONS_00759563"; exon_number "1"; gene_type "intronic_lncRNA";
3R	Cufflinks	exon	1210666	1210879	+	gene_id "XLOC_132683"; transcript_id "TCONS_00705935"; exon_number "1"; gene_type "intronic_lncRNA";
3R	Cufflinks	exon	2211032	2211255	+	gene_id "XLOC_133399"; transcript_id "TCONS_00706539"; exon_number "1"; gene_type "intronic_lncRNA";
3R	Cufflinks	exon	3118211	3118277	+	gene_id "XLOC_134140"; transcript_id "TCONS_00672734"; exon_number "1"; gene_type "intronic_lncRNA";
3R	Cufflinks	exon	3119282	3119906	+	gene_id "XLOC_134140"; transcript_id "TCONS_00672734"; exon_number "2"; gene_type "intronic_lncRNA";
3R	Cufflinks	exon	3118220	3118277	+	gene_id "XLOC_134140"; transcript_id "TCONS_00760330"; exon_number "1"; gene_type "intronic_lncRNA";
3R	Cufflinks	exon	3119056	3119389	+	gene_id "XLOC_134140"; transcript_id "TCONS_00760330"; exon_number "2"; gene_type "intronic_lncRNA";
3R	Cufflinks	exon	3119456	3119782	+	gene_id "XLOC_134140"; transcript_id "TCONS_00760330"; exon_number "3"; gene_type "intronic_lncRNA";
3R	Cufflinks	exon	3118240	3118277	+	gene_id "XLOC_134140"; transcript_id "TCONS_00638919"; exon_number "1"; gene_type "intronic_lncRNA";
3R	Cufflinks	exon	3119456	3119906	+	gene_id "XLOC_134140"; transcript_id "TCONS_00638919"; exon_number "2"; gene_type "intronic_lncRNA";
3R	Cufflinks	exon	3118254	3118277	+	gene_id "XLOC_134140"; transcript_id "TCONS_00638918"; exon_number "1"; gene_type "intronic_lncRNA";
3R	Cufflinks	exon	3119056	3119906	+	gene_id "XLOC_134140"; transcript_id "TCONS_00638918"; exon_number "2"; gene_type "intronic_lncRNA";
3R	Cufflinks	exon	3199214	3199418	+	gene_id "XLOC_134207"; transcript_id "TCONS_00672769"; exon_number "1"; gene_type "intronic_lncRNA";
3R	Cufflinks	exon	3321351	3321551	+	gene_id "XLOC_134305"; transcript_id "TCONS_00760385"; exon_number "1"; gene_type "lincRNA";
3R	Cufflinks	exon	3635607	3635808	+	gene_id "XLOC_134412"; transcript_id "TCONS_00706969"; exon_number "1"; gene_type "lincRNA";
3R	Cufflinks	exon	3845738	3845813	+	gene_id "XLOC_134471"; transcript_id "TCONS_00707053"; exon_number "1"; gene_type "lincRNA";
3R	Cufflinks	exon	3845880	3846149	+	gene_id "XLOC_134471"; transcript_id "TCONS_00707053"; exon_number "2"; gene_type "lincRNA";
3R	Cufflinks	exon	4162527	4162731	+	gene_id "XLOC_134674"; transcript_id "TCONS_00639341"; exon_number "1"; gene_type "lincRNA";
3R	Cufflinks	exon	4189350	4189444	+	gene_id "XLOC_134692"; transcript_id "TCONS_00639369"; exon_number "1"; gene_type "anti-sense_lncRNA";
3R	Cufflinks	exon	4189525	4189692	+	gene_id "XLOC_134692"; transcript_id "TCONS_00639369"; exon_number "2"; gene_type "anti-sense_lncRNA";
3R	Cufflinks	exon	4229932	4230076	+	gene_id "XLOC_134703"; transcript_id "TCONS_00782450"; exon_number "1"; gene_type "lincRNA";
3R	Cufflinks	exon	4230132	4230186	+	gene_id "XLOC_134703"; transcript_id "TCONS_00782450"; exon_number "2"; gene_type "lincRNA";
3R	Cufflinks	exon	4375138	4377695	+	gene_id "XLOC_134762"; transcript_id "TCONS_00639454"; exon_number "1"; gene_type "lincRNA";
3R	Scripture	exon	4393828	4395728	+	gene_id "XLOC_134764"; transcript_id "TCONS_00857551"; exon_number "1"; gene_type "anti-sense_lncRNA";
3R	Scripture	exon	4395890	4396036	+	gene_id "XLOC_134764"; transcript_id "TCONS_00857551"; exon_number "2"; gene_type "anti-sense_lncRNA";
3R	Scripture	exon	4396118	4396303	+	gene_id "XLOC_134764"; transcript_id "TCONS_00857551"; exon_number "3"; gene_type "anti-sense_lncRNA";
3R	Scripture	exon	4396380	4396828	+	gene_id "XLOC_134764"; transcript_id "TCONS_00857551"; exon_number "4"; gene_type "anti-sense_lncRNA";
3R	Cufflinks	exon	4575552	4575752	+	gene_id "XLOC_134897"; transcript_id "TCONS_00639546"; exon_number "1"; gene_type "lincRNA";
3R	Cufflinks	exon	4616216	4616438	+	gene_id "XLOC_134965"; transcript_id "TCONS_00782582"; exon_number "1"; gene_type "intronic_lncRNA";
3R	Cufflinks	exon	4866350	4866554	+	gene_id "XLOC_135104"; transcript_id "TCONS_00782664"; exon_number "1"; gene_type "intronic_lncRNA";
3R	Cufflinks	exon	5014899	5015971	+	gene_id "XLOC_135203"; transcript_id "TCONS_00673476"; exon_number "1"; gene_type "lincRNA";
3R	Cufflinks	exon	5021070	5021077	+	gene_id "XLOC_135203"; transcript_id "TCONS_00673476"; exon_number "2"; gene_type "lincRNA";
3R	Cufflinks	exon	5074608	5074812	+	gene_id "XLOC_135254"; transcript_id "TCONS_00639804"; exon_number "1"; gene_type "lincRNA";
3R	Cufflinks	exon	5103368	5103588	+	gene_id "XLOC_135280"; transcript_id "TCONS_00673545"; exon_number "1"; gene_type "lincRNA";
3R	Scripture	exon	5463731	5463872	+	gene_id "XLOC_135503"; transcript_id "TCONS_00857753"; exon_number "1"; gene_type "anti-sense_lncRNA";
3R	Scripture	exon	5465182	5465618	+	gene_id "XLOC_135503"; transcript_id "TCONS_00857753"; exon_number "2"; gene_type "anti-sense_lncRNA";
3R	Scripture	exon	5465682	5465731	+	gene_id "XLOC_135503"; transcript_id "TCONS_00857753"; exon_number "3"; gene_type "anti-sense_lncRNA";
3R	Scripture	exon	5599280	5599414	+	gene_id "XLOC_135547"; transcript_id "TCONS_00890910"; exon_number "1"; gene_type "anti-sense_lncRNA";
3R	Scripture	exon	5599488	5600157	+	gene_id "XLOC_135547"; transcript_id "TCONS_00890910"; exon_number "2"; gene_type "anti-sense_lncRNA";
3R	Cufflinks	exon	5931507	5931733	+	gene_id "XLOC_135733"; transcript_id "TCONS_00673876"; exon_number "1"; gene_type "intronic_lncRNA";
3R	Cufflinks	exon	6103252	6103464	+	gene_id "XLOC_135935"; transcript_id "TCONS_00708009"; exon_number "1"; gene_type "lincRNA";
3R	Cufflinks	exon	6967593	6967796	+	gene_id "XLOC_136812"; transcript_id "TCONS_00640905"; exon_number "1"; gene_type "intronic_lncRNA";
3R	Cufflinks	exon	7158110	7158331	+	gene_id "XLOC_136969"; transcript_id "TCONS_00809841"; exon_number "1"; gene_type "lincRNA";
3R	Cufflinks	exon	7623614	7623834	+	gene_id "XLOC_137512"; transcript_id "TCONS_00675115"; exon_number "1"; gene_type "intronic_lncRNA";
3R	Cufflinks	exon	7680393	7680593	+	gene_id "XLOC_137582"; transcript_id "TCONS_00761984"; exon_number "1"; gene_type "intronic_lncRNA";
3R	Cufflinks	exon	7690391	7690593	+	gene_id "XLOC_137597"; transcript_id "TCONS_00641379"; exon_number "1"; gene_type "intronic_lncRNA";
3R	Cufflinks	exon	7992529	7992729	+	gene_id "XLOC_137771"; transcript_id "TCONS_00762103"; exon_number "1"; gene_type "intronic_lncRNA";
3R	Cufflinks	exon	8211237	8211460	+	gene_id "XLOC_137916"; transcript_id "TCONS_00784249"; exon_number "1"; gene_type "lincRNA";
3R	Cufflinks	exon	8478410	8478612	+	gene_id "XLOC_138115"; transcript_id "TCONS_00810451"; exon_number "1"; gene_type "lincRNA";
3R	Cufflinks	exon	8918598	8918797	+	gene_id "XLOC_138409"; transcript_id "TCONS_00709385"; exon_number "1"; gene_type "intronic_lncRNA";
3R	Cufflinks	exon	8929072	8929275	+	gene_id "XLOC_138415"; transcript_id "TCONS_00709387"; exon_number "1"; gene_type "intronic_lncRNA";
3R	Cufflinks	exon	9147309	9147542	+	gene_id "XLOC_138531"; transcript_id "TCONS_00709431"; exon_number "1"; gene_type "intronic_lncRNA";
3R	Cufflinks	exon	9378810	9379022	+	gene_id "XLOC_138636"; transcript_id "TCONS_00642142"; exon_number "1"; gene_type "intronic_lncRNA";
3R	Cufflinks	exon	9833369	9833581	+	gene_id "XLOC_138829"; transcript_id "TCONS_00709544"; exon_number "1"; gene_type "intronic_lncRNA";
3R	Cufflinks	exon	9885682	9885895	+	gene_id "XLOC_138870"; transcript_id "TCONS_00676087"; exon_number "1"; gene_type "intronic_lncRNA";
3R	Cufflinks	exon	9887464	9887670	+	gene_id "XLOC_138871"; transcript_id "TCONS_00784762"; exon_number "1"; gene_type "intronic_lncRNA";
3R	Cufflinks	exon	9913099	9913365	+	gene_id "XLOC_138887"; transcript_id "TCONS_00642328"; exon_number "1"; gene_type "intronic_lncRNA";
3R	Cufflinks	exon	10564654	10564890	+	gene_id "XLOC_139271"; transcript_id "TCONS_00737557"; exon_number "1"; gene_type "intronic_lncRNA";
3R	Cufflinks	exon	10681371	10681663	+	gene_id "XLOC_139404"; transcript_id "TCONS_00676392"; exon_number "1"; gene_type "lincRNA";
3R	Cufflinks	exon	10683623	10684103	+	gene_id "XLOC_139404"; transcript_id "TCONS_00676392"; exon_number "2"; gene_type "lincRNA";
3R	Cufflinks	exon	10757266	10758280	+	gene_id "XLOC_139483"; transcript_id "TCONS_00642725"; exon_number "1"; gene_type "anti-sense_lncRNA";
3R	Cufflinks	exon	10825142	10825385	+	gene_id "XLOC_139530"; transcript_id "TCONS_00676474"; exon_number "1"; gene_type "lincRNA";
3R	Scripture	exon	10859595	10860734	+	gene_id "XLOC_139557"; transcript_id "TCONS_00869960"; exon_number "1"; gene_type "anti-sense_lncRNA";
3R	Scripture	exon	10860804	10861044	+	gene_id "XLOC_139557"; transcript_id "TCONS_00869960"; exon_number "2"; gene_type "anti-sense_lncRNA";
3R	Cufflinks	exon	10902459	10902680	+	gene_id "XLOC_139576"; transcript_id "TCONS_00676500"; exon_number "1"; gene_type "lincRNA";
3R	Cufflinks	exon	10936661	10936870	+	gene_id "XLOC_139631"; transcript_id "TCONS_00737713"; exon_number "1"; gene_type "lincRNA";
3R	Cufflinks	exon	11075274	11075473	+	gene_id "XLOC_139781"; transcript_id "TCONS_00676686"; exon_number "1"; gene_type "lincRNA";
3R	Cufflinks	exon	11280596	11280821	+	gene_id "XLOC_139999"; transcript_id "TCONS_00710260"; exon_number "1"; gene_type "lincRNA";
3R	Cufflinks	exon	11477782	11478009	+	gene_id "XLOC_140178"; transcript_id "TCONS_00710385"; exon_number "1"; gene_type "lincRNA";
3R	Scripture	exon	11637070	11637738	+	gene_id "XLOC_140295"; transcript_id "TCONS_00858908"; exon_number "1"; gene_type "anti-sense_lncRNA";
3R	Scripture	exon	11637799	11637936	+	gene_id "XLOC_140295"; transcript_id "TCONS_00858908"; exon_number "2"; gene_type "anti-sense_lncRNA";
3R	Scripture	exon	11638015	11638552	+	gene_id "XLOC_140295"; transcript_id "TCONS_00858908"; exon_number "3"; gene_type "anti-sense_lncRNA";
3R	Cufflinks	exon	11691413	11691525	+	gene_id "XLOC_140306"; transcript_id "TCONS_00677078"; exon_number "1"; gene_type "anti-sense_lncRNA";
3R	Cufflinks	exon	11691620	11693372	+	gene_id "XLOC_140306"; transcript_id "TCONS_00677078"; exon_number "2"; gene_type "anti-sense_lncRNA";
3R	Cufflinks	exon	12619328	12619527	+	gene_id "XLOC_140999"; transcript_id "TCONS_00738492"; exon_number "1"; gene_type "lincRNA";
3R	Cufflinks	exon	12777074	12777285	+	gene_id "XLOC_141129"; transcript_id "TCONS_00738573"; exon_number "1"; gene_type "intronic_lncRNA";
3R	Cufflinks	exon	12876314	12876513	+	gene_id "XLOC_141288"; transcript_id "TCONS_00738632"; exon_number "1"; gene_type "lincRNA";
3R	Cufflinks	exon	13376909	13377805	+	gene_id "XLOC_141653"; transcript_id "TCONS_00644278"; exon_number "1"; gene_type "anti-sense_lncRNA";
3R	Cufflinks	exon	13524193	13524418	+	gene_id "XLOC_141831"; transcript_id "TCONS_00644373"; exon_number "1"; gene_type "lincRNA";
3R	Cufflinks	exon	13596847	13597060	+	gene_id "XLOC_141945"; transcript_id "TCONS_00812283"; exon_number "1"; gene_type "lincRNA";
3R	Cufflinks	exon	13604966	13605165	+	gene_id "XLOC_141957"; transcript_id "TCONS_00763884"; exon_number "1"; gene_type "lincRNA";
3R	Cufflinks	exon	13721972	13722205	+	gene_id "XLOC_142035"; transcript_id "TCONS_00786405"; exon_number "1"; gene_type "intronic_lncRNA";
3R	Cufflinks	exon	13737623	13737868	+	gene_id "XLOC_142055"; transcript_id "TCONS_00678240"; exon_number "1"; gene_type "intronic_lncRNA";
3R	Cufflinks	exon	13844025	13844229	+	gene_id "XLOC_142171"; transcript_id "TCONS_00644576"; exon_number "1"; gene_type "lincRNA";
3R	Cufflinks	exon	13880677	13880884	+	gene_id "XLOC_142235"; transcript_id "TCONS_00644612"; exon_number "1"; gene_type "lincRNA";
3R	Cufflinks	exon	13909718	13909917	+	gene_id "XLOC_142295"; transcript_id "TCONS_00678382"; exon_number "1"; gene_type "lincRNA";
3R	Cufflinks	exon	14230495	14230698	+	gene_id "XLOC_142597"; transcript_id "TCONS_00764093"; exon_number "1"; gene_type "lincRNA";
3R	Cufflinks	exon	14257964	14258171	+	gene_id "XLOC_142613"; transcript_id "TCONS_00644833"; exon_number "1"; gene_type "intronic_lncRNA";
3R	Cufflinks	exon	14405585	14405799	+	gene_id "XLOC_142700"; transcript_id "TCONS_00739236"; exon_number "1"; gene_type "intronic_lncRNA";
3R	Cufflinks	exon	14568867	14568995	+	gene_id "XLOC_142856"; transcript_id "TCONS_00644952"; exon_number "1"; gene_type "anti-sense_lncRNA";
3R	Cufflinks	exon	14569148	14569924	+	gene_id "XLOC_142856"; transcript_id "TCONS_00644952"; exon_number "2"; gene_type "anti-sense_lncRNA";
3R	Cufflinks	exon	14568974	14569013	+	gene_id "XLOC_142856"; transcript_id "TCONS_00678700"; exon_number "1"; gene_type "anti-sense_lncRNA";
3R	Cufflinks	exon	14569148	14569994	+	gene_id "XLOC_142856"; transcript_id "TCONS_00678700"; exon_number "2"; gene_type "anti-sense_lncRNA";
3R	Cufflinks	exon	14587154	14587353	+	gene_id "XLOC_142872"; transcript_id "TCONS_00644967"; exon_number "1"; gene_type "intronic_lncRNA";
3R	Cufflinks	exon	14599488	14599716	+	gene_id "XLOC_142888"; transcript_id "TCONS_00711789"; exon_number "1"; gene_type "intronic_lncRNA";
3R	Cufflinks	exon	14676122	14676330	+	gene_id "XLOC_142916"; transcript_id "TCONS_00645002"; exon_number "1"; gene_type "intronic_lncRNA";
3R	Cufflinks	exon	14694882	14695110	+	gene_id "XLOC_142928"; transcript_id "TCONS_00678739"; exon_number "1"; gene_type "intronic_lncRNA";
3R	Cufflinks	exon	14718275	14718482	+	gene_id "XLOC_142945"; transcript_id "TCONS_00678745"; exon_number "1"; gene_type "intronic_lncRNA";
3R	Cufflinks	exon	14860533	14860742	+	gene_id "XLOC_142997"; transcript_id "TCONS_00786807"; exon_number "1"; gene_type "intronic_lncRNA";
3R	Cufflinks	exon	14912881	14913128	+	gene_id "XLOC_143049"; transcript_id "TCONS_00645064"; exon_number "1"; gene_type "lincRNA";
3R	Cufflinks	exon	15009845	15010060	+	gene_id "XLOC_143201"; transcript_id "TCONS_00711942"; exon_number "1"; gene_type "lincRNA";
3R	Cufflinks	exon	15023429	15023637	+	gene_id "XLOC_143219"; transcript_id "TCONS_00812816"; exon_number "1"; gene_type "lincRNA";
3R	Cufflinks	exon	15118233	15118442	+	gene_id "XLOC_143287"; transcript_id "TCONS_00645194"; exon_number "1"; gene_type "intronic_lncRNA";
3R	Cufflinks	exon	15130884	15131429	+	gene_id "XLOC_143294"; transcript_id "TCONS_00678952"; exon_number "1"; gene_type "intronic_lncRNA";
3R	Cufflinks	exon	15157150	15157382	+	gene_id "XLOC_143314"; transcript_id "TCONS_00711996"; exon_number "1"; gene_type "intronic_lncRNA";
3R	Cufflinks	exon	15700175	15700380	+	gene_id "XLOC_143690"; transcript_id "TCONS_00645537"; exon_number "1"; gene_type "lincRNA";
3R	Cufflinks	exon	15701170	15701495	+	gene_id "XLOC_143690"; transcript_id "TCONS_00645537"; exon_number "2"; gene_type "lincRNA";
3R	Cufflinks	exon	15724544	15724751	+	gene_id "XLOC_143721"; transcript_id "TCONS_00679293"; exon_number "1"; gene_type "lincRNA";
3R	Cufflinks	exon	15726114	15726315	+	gene_id "XLOC_143723"; transcript_id "TCONS_00679297"; exon_number "1"; gene_type "lincRNA";
3R	Cufflinks	exon	15876259	15876481	+	gene_id "XLOC_143848"; transcript_id "TCONS_00679363"; exon_number "1"; gene_type "lincRNA";
3R	Cufflinks	exon	16078103	16078311	+	gene_id "XLOC_143946"; transcript_id "TCONS_00645734"; exon_number "1"; gene_type "intronic_lncRNA";
3R	Cufflinks	exon	16161332	16161554	+	gene_id "XLOC_144031"; transcript_id "TCONS_00645792"; exon_number "1"; gene_type "intronic_lncRNA";
3R	Scripture	exon	16352089	16352345	+	gene_id "XLOC_144119"; transcript_id "TCONS_00879946"; exon_number "1"; gene_type "anti-sense_lncRNA";
3R	Scripture	exon	16356796	16357113	+	gene_id "XLOC_144119"; transcript_id "TCONS_00879946"; exon_number "2"; gene_type "anti-sense_lncRNA";
3R	Cufflinks	exon	16384595	16384822	+	gene_id "XLOC_144154"; transcript_id "TCONS_00645896"; exon_number "1"; gene_type "intronic_lncRNA";
3R	Cufflinks	exon	16413456	16413656	+	gene_id "XLOC_144194"; transcript_id "TCONS_00787481"; exon_number "1"; gene_type "lincRNA";
3R	Scripture	exon	16428264	16429179	+	gene_id "XLOC_144220"; transcript_id "TCONS_00645936"; exon_number "1"; gene_type "lincRNA";
3R	Cufflinks	exon	16523453	16523652	+	gene_id "XLOC_144283"; transcript_id "TCONS_00764808"; exon_number "1"; gene_type "intronic_lncRNA";
3R	Cufflinks	exon	16797719	16797919	+	gene_id "XLOC_144545"; transcript_id "TCONS_00712741"; exon_number "1"; gene_type "lincRNA";
3R	Cufflinks	exon	17228315	17228515	+	gene_id "XLOC_144948"; transcript_id "TCONS_00765046"; exon_number "1"; gene_type "lincRNA";
3R	Cufflinks	exon	17342075	17342283	+	gene_id "XLOC_145108"; transcript_id "TCONS_00646533"; exon_number "1"; gene_type "intronic_lncRNA";
3R	Cufflinks	exon	17827938	17828162	+	gene_id "XLOC_145537"; transcript_id "TCONS_00646783"; exon_number "1"; gene_type "intronic_lncRNA";
3R	Cufflinks	exon	18065143	18065342	+	gene_id "XLOC_145820"; transcript_id "TCONS_00646931"; exon_number "1"; gene_type "lincRNA";
3R	Cufflinks	exon	18085387	18085644	+	gene_id "XLOC_145860"; transcript_id "TCONS_00765336"; exon_number "1"; gene_type "lincRNA";
3R	Cufflinks	exon	18233020	18233225	+	gene_id "XLOC_146029"; transcript_id "TCONS_00740879"; exon_number "1"; gene_type "lincRNA";
3R	Cufflinks	exon	18311542	18311744	+	gene_id "XLOC_146074"; transcript_id "TCONS_00647076"; exon_number "1"; gene_type "intronic_lncRNA";
3R	Cufflinks	exon	18343673	18343904	+	gene_id "XLOC_146118"; transcript_id "TCONS_00740907"; exon_number "1"; gene_type "intronic_lncRNA";
3R	Cufflinks	exon	18436094	18436304	+	gene_id "XLOC_146172"; transcript_id "TCONS_00713482"; exon_number "1"; gene_type "intronic_lncRNA";
3R	Cufflinks	exon	18545920	18546132	+	gene_id "XLOC_146295"; transcript_id "TCONS_00740943"; exon_number "1"; gene_type "lincRNA";
3R	Scripture	exon	18760699	18760905	+	gene_id "XLOC_146407"; transcript_id "TCONS_00859929"; exon_number "1"; gene_type "anti-sense_lncRNA";
3R	Scripture	exon	18760969	18761154	+	gene_id "XLOC_146407"; transcript_id "TCONS_00859929"; exon_number "2"; gene_type "anti-sense_lncRNA";
3R	Cufflinks	exon	18865632	18865848	+	gene_id "XLOC_146486"; transcript_id "TCONS_00681099"; exon_number "1"; gene_type "lincRNA";
3R	Cufflinks	exon	19278161	19278378	+	gene_id "XLOC_146759"; transcript_id "TCONS_00741182"; exon_number "1"; gene_type "lincRNA";
3R	Cufflinks	exon	19345218	19345425	+	gene_id "XLOC_146848"; transcript_id "TCONS_00647580"; exon_number "1"; gene_type "lincRNA";
3R	Cufflinks	exon	19722619	19722841	+	gene_id "XLOC_146959"; transcript_id "TCONS_00765862"; exon_number "1"; gene_type "lincRNA";
3R	Cufflinks	exon	19792925	19793141	+	gene_id "XLOC_147034"; transcript_id "TCONS_00647734"; exon_number "1"; gene_type "lincRNA";
3R	Cufflinks	exon	20188731	20188931	+	gene_id "XLOC_147368"; transcript_id "TCONS_00714110"; exon_number "1"; gene_type "lincRNA";
3R	Cufflinks	exon	20519560	20519783	+	gene_id "XLOC_147669"; transcript_id "TCONS_00681889"; exon_number "1"; gene_type "lincRNA";
3R	Scripture	exon	20574162	20574372	+	gene_id "XLOC_147703"; transcript_id "TCONS_00766163"; exon_number "1"; gene_type "anti-sense_lncRNA";
3R	Scripture	exon	20574629	20575826	+	gene_id "XLOC_147703"; transcript_id "TCONS_00766163"; exon_number "2"; gene_type "anti-sense_lncRNA";
3R	Scripture	exon	20585137	20585284	+	gene_id "XLOC_147708"; transcript_id "TCONS_00871170"; exon_number "1"; gene_type "anti-sense_lncRNA";
3R	Scripture	exon	20585781	20585875	+	gene_id "XLOC_147708"; transcript_id "TCONS_00871170"; exon_number "2"; gene_type "anti-sense_lncRNA";
3R	Cufflinks	exon	20712742	20712943	+	gene_id "XLOC_147780"; transcript_id "TCONS_00814917"; exon_number "1"; gene_type "intronic_lncRNA";
3R	Scripture	exon	20827025	20827338	+	gene_id "XLOC_147861"; transcript_id "TCONS_00860314"; exon_number "1"; gene_type "anti-sense_lncRNA";
3R	Scripture	exon	20827926	20830690	+	gene_id "XLOC_147861"; transcript_id "TCONS_00860314"; exon_number "2"; gene_type "anti-sense_lncRNA";
3R	Scripture	exon	20911449	20911538	+	gene_id "XLOC_147932"; transcript_id "TCONS_00682061"; exon_number "1"; gene_type "anti-sense_lncRNA";
3R	Scripture	exon	20912124	20912345	+	gene_id "XLOC_147932"; transcript_id "TCONS_00682061"; exon_number "2"; gene_type "anti-sense_lncRNA";
3R	Scripture	exon	20912422	20913139	+	gene_id "XLOC_147932"; transcript_id "TCONS_00682061"; exon_number "3"; gene_type "anti-sense_lncRNA";
3R	Scripture	exon	20911478	20911709	+	gene_id "XLOC_147932"; transcript_id "TCONS_00741762"; exon_number "1"; gene_type "anti-sense_lncRNA";
3R	Scripture	exon	20911771	20912345	+	gene_id "XLOC_147932"; transcript_id "TCONS_00741762"; exon_number "2"; gene_type "anti-sense_lncRNA";
3R	Scripture	exon	20912422	20913081	+	gene_id "XLOC_147932"; transcript_id "TCONS_00741762"; exon_number "3"; gene_type "anti-sense_lncRNA";
3R	Scripture	exon	20911484	20912345	+	gene_id "XLOC_147932"; transcript_id "TCONS_00648284"; exon_number "1"; gene_type "anti-sense_lncRNA";
3R	Scripture	exon	20912422	20913153	+	gene_id "XLOC_147932"; transcript_id "TCONS_00648284"; exon_number "2"; gene_type "anti-sense_lncRNA";
3R	Scripture	exon	21296827	21297144	+	gene_id "XLOC_148093"; transcript_id "TCONS_00871508"; exon_number "1"; gene_type "lincRNA";
3R	Scripture	exon	21297810	21298141	+	gene_id "XLOC_148093"; transcript_id "TCONS_00871508"; exon_number "2"; gene_type "lincRNA";
3R	Cufflinks	exon	21600962	21601181	+	gene_id "XLOC_148381"; transcript_id "TCONS_00741962"; exon_number "1"; gene_type "intronic_lncRNA";
3R	Cufflinks	exon	21659100	21659308	+	gene_id "XLOC_148407"; transcript_id "TCONS_00815232"; exon_number "1"; gene_type "intronic_lncRNA";
3R	Cufflinks	exon	21671809	21672013	+	gene_id "XLOC_148413"; transcript_id "TCONS_00682366"; exon_number "1"; gene_type "lincRNA";
3R	Cufflinks	exon	21861176	21861382	+	gene_id "XLOC_148566"; transcript_id "TCONS_00766530"; exon_number "1"; gene_type "lincRNA";
3R	Cufflinks	exon	21924817	21925036	+	gene_id "XLOC_148628"; transcript_id "TCONS_00648749"; exon_number "1"; gene_type "lincRNA";
3R	Cufflinks	exon	22394887	22395095	+	gene_id "XLOC_148870"; transcript_id "TCONS_00682670"; exon_number "1"; gene_type "lincRNA";
3R	Cufflinks	exon	22503773	22503982	+	gene_id "XLOC_148940"; transcript_id "TCONS_00682732"; exon_number "1"; gene_type "intronic_lncRNA";
3R	Cufflinks	exon	22717935	22718135	+	gene_id "XLOC_149064"; transcript_id "TCONS_00649078"; exon_number "1"; gene_type "intronic_lncRNA";
3R	Cufflinks	exon	22859830	22860042	+	gene_id "XLOC_149176"; transcript_id "TCONS_00715107"; exon_number "1"; gene_type "lincRNA";
3R	Cufflinks	exon	22877451	22877660	+	gene_id "XLOC_149212"; transcript_id "TCONS_00649177"; exon_number "1"; gene_type "lincRNA";
3R	Cufflinks	exon	23158426	23158628	+	gene_id "XLOC_149505"; transcript_id "TCONS_00683142"; exon_number "1"; gene_type "anti-sense_lncRNA";
3R	Cufflinks	exon	23392832	23393034	+	gene_id "XLOC_149669"; transcript_id "TCONS_00742579"; exon_number "1"; gene_type "lincRNA";
3R	Cufflinks	exon	23634097	23634312	+	gene_id "XLOC_149947"; transcript_id "TCONS_00742691"; exon_number "1"; gene_type "intronic_lncRNA";
3R	Cufflinks	exon	23661200	23661413	+	gene_id "XLOC_149966"; transcript_id "TCONS_00742693"; exon_number "1"; gene_type "intronic_lncRNA";
3R	Scripture	exon	23826333	23826414	+	gene_id "XLOC_150011"; transcript_id "TCONS_00861063"; exon_number "1"; gene_type "intronic_lncRNA";
3R	Scripture	exon	23827889	23828950	+	gene_id "XLOC_150011"; transcript_id "TCONS_00861063"; exon_number "2"; gene_type "intronic_lncRNA";
3R	Scripture	exon	23826339	23826430	+	gene_id "XLOC_150011"; transcript_id "TCONS_00886918"; exon_number "1"; gene_type "intronic_lncRNA";
3R	Scripture	exon	23827874	23828296	+	gene_id "XLOC_150011"; transcript_id "TCONS_00886918"; exon_number "2"; gene_type "intronic_lncRNA";
3R	Scripture	exon	23826339	23826476	+	gene_id "XLOC_150011"; transcript_id "TCONS_00886919"; exon_number "1"; gene_type "intronic_lncRNA";
3R	Scripture	exon	23827878	23828656	+	gene_id "XLOC_150011"; transcript_id "TCONS_00886919"; exon_number "2"; gene_type "intronic_lncRNA";
3R	Scripture	exon	23826339	23826454	+	gene_id "XLOC_150011"; transcript_id "TCONS_00861064"; exon_number "1"; gene_type "intronic_lncRNA";
3R	Scripture	exon	23827887	23828656	+	gene_id "XLOC_150011"; transcript_id "TCONS_00861064"; exon_number "2"; gene_type "intronic_lncRNA";
3R	Scripture	exon	23826438	23826466	+	gene_id "XLOC_150011"; transcript_id "TCONS_00871909"; exon_number "1"; gene_type "intronic_lncRNA";
3R	Scripture	exon	23827887	23828780	+	gene_id "XLOC_150011"; transcript_id "TCONS_00871909"; exon_number "2"; gene_type "intronic_lncRNA";
3R	Scripture	exon	23826438	23826466	+	gene_id "XLOC_150011"; transcript_id "TCONS_00861066"; exon_number "1"; gene_type "intronic_lncRNA";
3R	Scripture	exon	23827889	23828780	+	gene_id "XLOC_150011"; transcript_id "TCONS_00861066"; exon_number "2"; gene_type "intronic_lncRNA";
3R	Cufflinks	exon	24361003	24361210	+	gene_id "XLOC_150236"; transcript_id "TCONS_00683554"; exon_number "1"; gene_type "anti-sense_lncRNA";
3R	Cufflinks	exon	24998605	24998824	+	gene_id "XLOC_150680"; transcript_id "TCONS_00683879"; exon_number "1"; gene_type "intronic_lncRNA";
3R	Cufflinks	exon	25089264	25089471	+	gene_id "XLOC_150724"; transcript_id "TCONS_00683932"; exon_number "1"; gene_type "lincRNA";
3R	Cufflinks	exon	25497310	25497513	+	gene_id "XLOC_150930"; transcript_id "TCONS_00790782"; exon_number "1"; gene_type "lincRNA";
3R	Cufflinks	exon	25668619	25668821	+	gene_id "XLOC_151037"; transcript_id "TCONS_00650513"; exon_number "1"; gene_type "intronic_lncRNA";
3R	Cufflinks	exon	25770980	25771204	+	gene_id "XLOC_151131"; transcript_id "TCONS_00684279"; exon_number "1"; gene_type "lincRNA";
3R	Cufflinks	exon	26313180	26313399	+	gene_id "XLOC_151622"; transcript_id "TCONS_00816862"; exon_number "1"; gene_type "lincRNA";
3R	Cufflinks	exon	26788914	26789154	+	gene_id "XLOC_152015"; transcript_id "TCONS_00651247"; exon_number "1"; gene_type "lincRNA";
3R	Cufflinks	exon	26958749	26958953	+	gene_id "XLOC_152062"; transcript_id "TCONS_00743896"; exon_number "1"; gene_type "lincRNA";
3R	Cufflinks	exon	27071773	27071977	+	gene_id "XLOC_152163"; transcript_id "TCONS_00743945"; exon_number "1"; gene_type "lincRNA";
3R	Cufflinks	exon	27109116	27111012	+	gene_id "XLOC_152205"; transcript_id "TCONS_00651381"; exon_number "1"; gene_type "anti-sense_lncRNA";
3R	Cufflinks	exon	27324463	27324672	+	gene_id "XLOC_152349"; transcript_id "TCONS_00685209"; exon_number "1"; gene_type "lincRNA";
3R	Cufflinks	exon	27427492	27427710	+	gene_id "XLOC_152460"; transcript_id "TCONS_00717073"; exon_number "1"; gene_type "intronic_lncRNA";
3R	Cufflinks	exon	27494934	27495137	+	gene_id "XLOC_152551"; transcript_id "TCONS_00685335"; exon_number "1"; gene_type "lincRNA";
3R	Cufflinks	exon	27537847	27538897	+	gene_id "XLOC_152599"; transcript_id "TCONS_00817349"; exon_number "1"; gene_type "lincRNA";
3R	Cufflinks	exon	27735261	27735463	+	gene_id "XLOC_152713"; transcript_id "TCONS_00651723"; exon_number "1"; gene_type "lincRNA";
3R	Cufflinks	exon	27753720	27753924	+	gene_id "XLOC_152721"; transcript_id "TCONS_00817414"; exon_number "1"; gene_type "lincRNA";
3R	Cufflinks	exon	28032364	28032583	+	gene_id "XLOC_152985"; transcript_id "TCONS_00651899"; exon_number "1"; gene_type "intronic_lncRNA";
3R	Cufflinks	exon	28132439	28132647	+	gene_id "XLOC_153123"; transcript_id "TCONS_00652010"; exon_number "1"; gene_type "lincRNA";
3R	Cufflinks	exon	28173320	28173723	+	gene_id "XLOC_153190"; transcript_id "TCONS_00652054"; exon_number "1"; gene_type "intronic_lncRNA";
3R	Cufflinks	exon	28181101	28181178	+	gene_id "XLOC_153190"; transcript_id "TCONS_00652054"; exon_number "2"; gene_type "intronic_lncRNA";
3R	Cufflinks	exon	28439594	28439808	+	gene_id "XLOC_153537"; transcript_id "TCONS_00717679"; exon_number "1"; gene_type "intronic_lncRNA";
3R	Cufflinks	exon	29021948	29022033	+	gene_id "XLOC_153975"; transcript_id "TCONS_00686459"; exon_number "1"; gene_type "lincRNA";
3R	Cufflinks	exon	29022544	29023871	+	gene_id "XLOC_153975"; transcript_id "TCONS_00686459"; exon_number "2"; gene_type "lincRNA";
3R	Cufflinks	exon	29086948	29087270	+	gene_id "XLOC_153998"; transcript_id "TCONS_00818073"; exon_number "1"; gene_type "intronic_lncRNA";
3R	Scripture	exon	29214569	29214959	+	gene_id "XLOC_154050"; transcript_id "TCONS_00872967"; exon_number "1"; gene_type "lincRNA";
3R	Scripture	exon	29215015	29217513	+	gene_id "XLOC_154050"; transcript_id "TCONS_00872967"; exon_number "2"; gene_type "lincRNA";
3R	Scripture	exon	29214569	29214959	+	gene_id "XLOC_154050"; transcript_id "TCONS_00872966"; exon_number "1"; gene_type "lincRNA";
3R	Scripture	exon	29215020	29218411	+	gene_id "XLOC_154050"; transcript_id "TCONS_00872966"; exon_number "2"; gene_type "lincRNA";
3R	Cufflinks	exon	29775629	29776000	+	gene_id "XLOC_154747"; transcript_id "TCONS_00718363"; exon_number "1"; gene_type "intronic_lncRNA";
3R	Scripture	exon	29783987	29785675	+	gene_id "XLOC_154756"; transcript_id "TCONS_00872992"; exon_number "1"; gene_type "intronic_lncRNA";
3R	Cufflinks	exon	30088263	30088506	+	gene_id "XLOC_154896"; transcript_id "TCONS_00653188"; exon_number "1"; gene_type "intronic_lncRNA";
3R	Cufflinks	exon	30127745	30127955	+	gene_id "XLOC_154907"; transcript_id "TCONS_00687027"; exon_number "1"; gene_type "anti-sense_lncRNA";
3R	Cufflinks	exon	30150353	30150576	+	gene_id "XLOC_154929"; transcript_id "TCONS_00687036"; exon_number "1"; gene_type "lincRNA";
3R	Cufflinks	exon	30227248	30227452	+	gene_id "XLOC_155010"; transcript_id "TCONS_00718498"; exon_number "1"; gene_type "lincRNA";
3R	Cufflinks	exon	30719437	30719660	+	gene_id "XLOC_155424"; transcript_id "TCONS_00687327"; exon_number "1"; gene_type "lincRNA";
3R	Scripture	exon	30744581	30744960	+	gene_id "XLOC_155461"; transcript_id "TCONS_00718729"; exon_number "1"; gene_type "anti-sense_lncRNA";
3R	Scripture	exon	30745994	30746448	+	gene_id "XLOC_155461"; transcript_id "TCONS_00718729"; exon_number "2"; gene_type "anti-sense_lncRNA";
3R	Cufflinks	exon	31995266	31995474	+	gene_id "XLOC_156372"; transcript_id "TCONS_00793708"; exon_number "1"; gene_type "intronic_lncRNA";
3R	Cufflinks	exon	1951674	1951879	-	gene_id "XLOC_157617"; transcript_id "TCONS_00719898"; exon_number "1"; gene_type "intronic_lncRNA";
3R	Cufflinks	exon	2775830	2776037	-	gene_id "XLOC_158295"; transcript_id "TCONS_00655217"; exon_number "1"; gene_type "intronic_lncRNA";
3R	Cufflinks	exon	3180729	3180940	-	gene_id "XLOC_158647"; transcript_id "TCONS_00720304"; exon_number "1"; gene_type "intronic_lncRNA";
3R	Cufflinks	exon	3287074	3287284	-	gene_id "XLOC_158757"; transcript_id "TCONS_00655491"; exon_number "1"; gene_type "lincRNA";
3R	Cufflinks	exon	4151389	4151554	-	gene_id "XLOC_159174"; transcript_id "TCONS_00655833"; exon_number "1"; gene_type "lincRNA";
3R	Cufflinks	exon	4151625	4151804	-	gene_id "XLOC_159174"; transcript_id "TCONS_00655833"; exon_number "2"; gene_type "lincRNA";
3R	Cufflinks	exon	4825433	4825638	-	gene_id "XLOC_159552"; transcript_id "TCONS_00747796"; exon_number "1"; gene_type "lincRNA";
3R	Cufflinks	exon	5024320	5024562	-	gene_id "XLOC_159701"; transcript_id "TCONS_00690176"; exon_number "1"; gene_type "lincRNA";
3R	Cufflinks	exon	5045614	5045820	-	gene_id "XLOC_159719"; transcript_id "TCONS_00771483"; exon_number "1"; gene_type "lincRNA";
3R	Cufflinks	exon	5518378	5518600	-	gene_id "XLOC_159959"; transcript_id "TCONS_00690421"; exon_number "1"; gene_type "anti-sense_lncRNA";
3R	Cufflinks	exon	5624605	5624889	-	gene_id "XLOC_159991"; transcript_id "TCONS_00771662"; exon_number "1"; gene_type "intronic_lncRNA";
3R	Scripture	exon	5835839	5835911	-	gene_id "XLOC_160095"; transcript_id "TCONS_00893283"; exon_number "1"; gene_type "anti-sense_lncRNA";
3R	Scripture	exon	5835991	5836169	-	gene_id "XLOC_160095"; transcript_id "TCONS_00893283"; exon_number "2"; gene_type "anti-sense_lncRNA";
3R	Cufflinks	exon	6172153	6172367	-	gene_id "XLOC_160411"; transcript_id "TCONS_00690794"; exon_number "1"; gene_type "lincRNA";
3R	Cufflinks	exon	6216083	6216283	-	gene_id "XLOC_160459"; transcript_id "TCONS_00656929"; exon_number "1"; gene_type "anti-sense_lncRNA";
3R	Cufflinks	exon	6350486	6350686	-	gene_id "XLOC_160637"; transcript_id "TCONS_00821225"; exon_number "1"; gene_type "anti-sense_lncRNA";
3R	Cufflinks	exon	6829761	6829965	-	gene_id "XLOC_161086"; transcript_id "TCONS_00748772"; exon_number "1"; gene_type "intronic_lncRNA";
3R	Cufflinks	exon	7017095	7017314	-	gene_id "XLOC_161301"; transcript_id "TCONS_00796313"; exon_number "1"; gene_type "lincRNA";
3R	Cufflinks	exon	7035519	7035724	-	gene_id "XLOC_161334"; transcript_id "TCONS_00748921"; exon_number "1"; gene_type "lincRNA";
3R	Cufflinks	exon	7054437	7054701	-	gene_id "XLOC_161360"; transcript_id "TCONS_00722158"; exon_number "1"; gene_type "anti-sense_lncRNA";
3R	Cufflinks	exon	7179672	7179885	-	gene_id "XLOC_161423"; transcript_id "TCONS_00691480"; exon_number "1"; gene_type "intronic_lncRNA";
3R	Cufflinks	exon	7295480	7295686	-	gene_id "XLOC_161533"; transcript_id "TCONS_00691558"; exon_number "1"; gene_type "intronic_lncRNA";
3R	Cufflinks	exon	7299695	7299899	-	gene_id "XLOC_161541"; transcript_id "TCONS_00657729"; exon_number "1"; gene_type "intronic_lncRNA";
3R	Cufflinks	exon	7425734	7425985	-	gene_id "XLOC_161715"; transcript_id "TCONS_00657848"; exon_number "1"; gene_type "lincRNA";
3R	Cufflinks	exon	7946901	7947123	-	gene_id "XLOC_162115"; transcript_id "TCONS_00722613"; exon_number "1"; gene_type "intronic_lncRNA";
3R	Cufflinks	exon	8090364	8090565	-	gene_id "XLOC_162210"; transcript_id "TCONS_00692072"; exon_number "1"; gene_type "lincRNA";
3R	Cufflinks	exon	8116107	8116370	-	gene_id "XLOC_162216"; transcript_id "TCONS_00658214"; exon_number "1"; gene_type "intronic_lncRNA";
3R	Cufflinks	exon	8119258	8119478	-	gene_id "XLOC_162218"; transcript_id "TCONS_00692075"; exon_number "1"; gene_type "intronic_lncRNA";
3R	Scripture	exon	8562734	8562865	-	gene_id "XLOC_162630"; transcript_id "TCONS_00888293"; exon_number "1"; gene_type "anti-sense_lncRNA";
3R	Scripture	exon	8562935	8563329	-	gene_id "XLOC_162630"; transcript_id "TCONS_00888293"; exon_number "2"; gene_type "anti-sense_lncRNA";
3R	Scripture	exon	8563670	8563883	-	gene_id "XLOC_162630"; transcript_id "TCONS_00888293"; exon_number "3"; gene_type "anti-sense_lncRNA";
3R	Scripture	exon	8562741	8562865	-	gene_id "XLOC_162630"; transcript_id "TCONS_00874068"; exon_number "1"; gene_type "anti-sense_lncRNA";
3R	Scripture	exon	8562935	8563329	-	gene_id "XLOC_162630"; transcript_id "TCONS_00874068"; exon_number "2"; gene_type "anti-sense_lncRNA";
3R	Scripture	exon	8563409	8564082	-	gene_id "XLOC_162630"; transcript_id "TCONS_00874068"; exon_number "3"; gene_type "anti-sense_lncRNA";
3R	Scripture	exon	8821384	8822155	-	gene_id "XLOC_162778"; transcript_id "TCONS_00863384"; exon_number "1"; gene_type "anti-sense_lncRNA";
3R	Scripture	exon	8822614	8822666	-	gene_id "XLOC_162778"; transcript_id "TCONS_00863384"; exon_number "2"; gene_type "anti-sense_lncRNA";
3R	Cufflinks	exon	8933044	8933093	-	gene_id "XLOC_162782"; transcript_id "TCONS_00749742"; exon_number "1"; gene_type "lincRNA";
3R	Cufflinks	exon	8933153	8933392	-	gene_id "XLOC_162782"; transcript_id "TCONS_00749742"; exon_number "2"; gene_type "lincRNA";
3R	Scripture	exon	8934082	8934823	-	gene_id "XLOC_162782"; transcript_id "TCONS_00863441"; exon_number "1"; gene_type "anti-sense_lncRNA";
3R	Scripture	exon	8935013	8935199	-	gene_id "XLOC_162782"; transcript_id "TCONS_00863441"; exon_number "2"; gene_type "anti-sense_lncRNA";
3R	Cufflinks	exon	9337475	9340225	-	gene_id "XLOC_162948"; transcript_id "TCONS_00658779"; exon_number "1"; gene_type "anti-sense_lncRNA";
3R	Cufflinks	exon	9340827	9341449	-	gene_id "XLOC_162948"; transcript_id "TCONS_00658779"; exon_number "2"; gene_type "anti-sense_lncRNA";
3R	Cufflinks	exon	9337475	9338644	-	gene_id "XLOC_162948"; transcript_id "TCONS_00658778"; exon_number "1"; gene_type "anti-sense_lncRNA";
3R	Cufflinks	exon	9338725	9341449	-	gene_id "XLOC_162948"; transcript_id "TCONS_00658778"; exon_number "2"; gene_type "anti-sense_lncRNA";
3R	Scripture	exon	9349675	9350450	-	gene_id "XLOC_162952"; transcript_id "TCONS_00874227"; exon_number "1"; gene_type "intronic_lncRNA";
3R	Scripture	exon	9350580	9350706	-	gene_id "XLOC_162952"; transcript_id "TCONS_00874227"; exon_number "2"; gene_type "intronic_lncRNA";
3R	Cufflinks	exon	9421165	9421412	-	gene_id "XLOC_162966"; transcript_id "TCONS_00658804"; exon_number "1"; gene_type "intronic_lncRNA";
3R	Cufflinks	exon	9436588	9436804	-	gene_id "XLOC_162982"; transcript_id "TCONS_00658813"; exon_number "1"; gene_type "intronic_lncRNA";
3R	Scripture	exon	9632107	9632341	-	gene_id "XLOC_163042"; transcript_id "TCONS_00863693"; exon_number "1"; gene_type "anti-sense_lncRNA";
3R	Scripture	exon	9632447	9632544	-	gene_id "XLOC_163042"; transcript_id "TCONS_00863693"; exon_number "2"; gene_type "anti-sense_lncRNA";
3R	Cufflinks	exon	9779409	9780171	-	gene_id "XLOC_163080"; transcript_id "TCONS_00658946"; exon_number "1"; gene_type "anti-sense_lncRNA";
3R	Cufflinks	exon	9856061	9856271	-	gene_id "XLOC_163118"; transcript_id "TCONS_00723302"; exon_number "1"; gene_type "intronic_lncRNA";
3R	Cufflinks	exon	9940163	9940422	-	gene_id "XLOC_163208"; transcript_id "TCONS_00659028"; exon_number "1"; gene_type "intronic_lncRNA";
3R	Cufflinks	exon	9948672	9948886	-	gene_id "XLOC_163217"; transcript_id "TCONS_00749962"; exon_number "1"; gene_type "intronic_lncRNA";
3R	Cufflinks	exon	9969720	9969946	-	gene_id "XLOC_163238"; transcript_id "TCONS_00723355"; exon_number "1"; gene_type "intronic_lncRNA";
3R	Cufflinks	exon	10225086	10225292	-	gene_id "XLOC_163344"; transcript_id "TCONS_00750012"; exon_number "1"; gene_type "anti-sense_lncRNA";
3R	Cufflinks	exon	10439179	10439385	-	gene_id "XLOC_163467"; transcript_id "TCONS_00797484"; exon_number "1"; gene_type "lincRNA";
3R	Cufflinks	exon	10526584	10526806	-	gene_id "XLOC_163585"; transcript_id "TCONS_00797550"; exon_number "1"; gene_type "intronic_lncRNA";
3R	Cufflinks	exon	10567637	10567848	-	gene_id "XLOC_163653"; transcript_id "TCONS_00750118"; exon_number "1"; gene_type "intronic_lncRNA";
3R	Cufflinks	exon	10634112	10634320	-	gene_id "XLOC_163725"; transcript_id "TCONS_00693079"; exon_number "1"; gene_type "intronic_lncRNA";
3R	Cufflinks	exon	11016169	11016369	-	gene_id "XLOC_164090"; transcript_id "TCONS_00659500"; exon_number "1"; gene_type "intronic_lncRNA";
3R	Cufflinks	exon	11315275	11315478	-	gene_id "XLOC_164419"; transcript_id "TCONS_00823312"; exon_number "1"; gene_type "lincRNA";
3R	Cufflinks	exon	11338445	11338673	-	gene_id "XLOC_164446"; transcript_id "TCONS_00823327"; exon_number "1"; gene_type "intronic_lncRNA";
3R	Cufflinks	exon	12135261	12135465	-	gene_id "XLOC_164904"; transcript_id "TCONS_00693954"; exon_number "1"; gene_type "lincRNA";
3R	Cufflinks	exon	12167853	12168060	-	gene_id "XLOC_164933"; transcript_id "TCONS_00693994"; exon_number "1"; gene_type "lincRNA";
3R	Cufflinks	exon	12170812	12171011	-	gene_id "XLOC_164936"; transcript_id "TCONS_00750818"; exon_number "1"; gene_type "lincRNA";
3R	Cufflinks	exon	12247941	12248143	-	gene_id "XLOC_165026"; transcript_id "TCONS_00694075"; exon_number "1"; gene_type "lincRNA";
3R	Scripture	exon	12441521	12443275	-	gene_id "XLOC_165154"; transcript_id "TCONS_00888884"; exon_number "1"; gene_type "intronic_lncRNA";
3R	Scripture	exon	12443485	12444042	-	gene_id "XLOC_165154"; transcript_id "TCONS_00888884"; exon_number "2"; gene_type "intronic_lncRNA";
3R	Cufflinks	exon	12585172	12585399	-	gene_id "XLOC_165248"; transcript_id "TCONS_00694265"; exon_number "1"; gene_type "intronic_lncRNA";
3R	Cufflinks	exon	12637317	12637531	-	gene_id "XLOC_165294"; transcript_id "TCONS_00751034"; exon_number "1"; gene_type "anti-sense_lncRNA";
3R	Cufflinks	exon	12656326	12656573	-	gene_id "XLOC_165315"; transcript_id "TCONS_00751045"; exon_number "1"; gene_type "intronic_lncRNA";
3R	Cufflinks	exon	12723515	12723732	-	gene_id "XLOC_165348"; transcript_id "TCONS_00694343"; exon_number "1"; gene_type "lincRNA";
3R	Scripture	exon	12981468	12982493	-	gene_id "XLOC_165693"; transcript_id "TCONS_00874886"; exon_number "1"; gene_type "intronic_lncRNA";
3R	Scripture	exon	12982550	12983325	-	gene_id "XLOC_165693"; transcript_id "TCONS_00874886"; exon_number "2"; gene_type "intronic_lncRNA";
3R	Cufflinks	exon	13346904	13347104	-	gene_id "XLOC_165931"; transcript_id "TCONS_00660763"; exon_number "1"; gene_type "lincRNA";
3R	Cufflinks	exon	13464061	13464399	-	gene_id "XLOC_166031"; transcript_id "TCONS_00660838"; exon_number "1"; gene_type "anti-sense_lncRNA";
3R	Cufflinks	exon	13465707	13466325	-	gene_id "XLOC_166031"; transcript_id "TCONS_00660838"; exon_number "2"; gene_type "anti-sense_lncRNA";
3R	Cufflinks	exon	13508943	13509149	-	gene_id "XLOC_166109"; transcript_id "TCONS_00694835"; exon_number "1"; gene_type "lincRNA";
3R	Cufflinks	exon	13721965	13722190	-	gene_id "XLOC_166353"; transcript_id "TCONS_00725079"; exon_number "1"; gene_type "intronic_lncRNA";
3R	Scripture	exon	13782113	13782808	-	gene_id "XLOC_166389"; transcript_id "TCONS_00874930"; exon_number "1"; gene_type "anti-sense_lncRNA";
3R	Scripture	exon	13782861	13782996	-	gene_id "XLOC_166389"; transcript_id "TCONS_00874930"; exon_number "2"; gene_type "anti-sense_lncRNA";
3R	Cufflinks	exon	13896901	13897118	-	gene_id "XLOC_166557"; transcript_id "TCONS_00661140"; exon_number "1"; gene_type "lincRNA";
3R	Cufflinks	exon	13899970	13900172	-	gene_id "XLOC_166562"; transcript_id "TCONS_00661144"; exon_number "1"; gene_type "lincRNA";
3R	Cufflinks	exon	13911356	13911559	-	gene_id "XLOC_166575"; transcript_id "TCONS_00725189"; exon_number "1"; gene_type "lincRNA";
3R	Cufflinks	exon	13925759	13925959	-	gene_id "XLOC_166598"; transcript_id "TCONS_00695139"; exon_number "1"; gene_type "lincRNA";
3R	Cufflinks	exon	13955547	13955757	-	gene_id "XLOC_166650"; transcript_id "TCONS_00725227"; exon_number "1"; gene_type "lincRNA";
3R	Cufflinks	exon	14132592	14133095	-	gene_id "XLOC_166755"; transcript_id "TCONS_00661332"; exon_number "1"; gene_type "lincRNA";
3R	Cufflinks	exon	14133183	14133635	-	gene_id "XLOC_166755"; transcript_id "TCONS_00661332"; exon_number "2"; gene_type "lincRNA";
3R	Cufflinks	exon	14547653	14547860	-	gene_id "XLOC_167076"; transcript_id "TCONS_00695500"; exon_number "1"; gene_type "intronic_lncRNA";
3R	Cufflinks	exon	14552251	14552456	-	gene_id "XLOC_167084"; transcript_id "TCONS_00725474"; exon_number "1"; gene_type "intronic_lncRNA";
3R	Cufflinks	exon	14581290	14581491	-	gene_id "XLOC_167103"; transcript_id "TCONS_00725487"; exon_number "1"; gene_type "intronic_lncRNA";
3R	Cufflinks	exon	14598841	14599043	-	gene_id "XLOC_167121"; transcript_id "TCONS_00661585"; exon_number "1"; gene_type "intronic_lncRNA";
3R	Cufflinks	exon	14721726	14722037	-	gene_id "XLOC_167175"; transcript_id "TCONS_00695572"; exon_number "1"; gene_type "intronic_lncRNA";
3R	Cufflinks	exon	15699215	15699473	-	gene_id "XLOC_167989"; transcript_id "TCONS_00752426"; exon_number "1"; gene_type "lincRNA";
3R	Cufflinks	exon	16718509	16718725	-	gene_id "XLOC_168717"; transcript_id "TCONS_00662607"; exon_number "1"; gene_type "intronic_lncRNA";
3R	Cufflinks	exon	16747537	16747748	-	gene_id "XLOC_168759"; transcript_id "TCONS_00696640"; exon_number "1"; gene_type "lincRNA";
3R	Cufflinks	exon	16898237	16898446	-	gene_id "XLOC_168941"; transcript_id "TCONS_00696760"; exon_number "1"; gene_type "lincRNA";
3R	Cufflinks	exon	17053724	17053957	-	gene_id "XLOC_169077"; transcript_id "TCONS_00662860"; exon_number "1"; gene_type "lincRNA";
3R	Scripture	exon	17081244	17081472	-	gene_id "XLOC_169100"; transcript_id "TCONS_00864670"; exon_number "1"; gene_type "intronic_lncRNA";
3R	Scripture	exon	17082331	17082507	-	gene_id "XLOC_169100"; transcript_id "TCONS_00864670"; exon_number "2"; gene_type "intronic_lncRNA";
3R	Cufflinks	exon	17182397	17182599	-	gene_id "XLOC_169163"; transcript_id "TCONS_00696933"; exon_number "1"; gene_type "intronic_lncRNA";
3R	Cufflinks	exon	17522914	17523122	-	gene_id "XLOC_169593"; transcript_id "TCONS_00697215"; exon_number "1"; gene_type "lincRNA";
3R	Cufflinks	exon	17585925	17586151	-	gene_id "XLOC_169674"; transcript_id "TCONS_00776007"; exon_number "1"; gene_type "lincRNA";
3R	Cufflinks	exon	17764528	17764732	-	gene_id "XLOC_169811"; transcript_id "TCONS_00726963"; exon_number "1"; gene_type "lincRNA";
3R	Cufflinks	exon	17899585	17899728	-	gene_id "XLOC_169913"; transcript_id "TCONS_00663367"; exon_number "1"; gene_type "intronic_lncRNA";
3R	Cufflinks	exon	17900384	17901040	-	gene_id "XLOC_169913"; transcript_id "TCONS_00663367"; exon_number "2"; gene_type "intronic_lncRNA";
3R	Cufflinks	exon	17899585	17899728	-	gene_id "XLOC_169913"; transcript_id "TCONS_00727045"; exon_number "1"; gene_type "intronic_lncRNA";
3R	Cufflinks	exon	17900773	17901159	-	gene_id "XLOC_169913"; transcript_id "TCONS_00727045"; exon_number "2"; gene_type "intronic_lncRNA";
3R	Cufflinks	exon	17936079	17936283	-	gene_id "XLOC_169953"; transcript_id "TCONS_00697446"; exon_number "1"; gene_type "intronic_lncRNA";
3R	Cufflinks	exon	18124649	18124922	-	gene_id "XLOC_170198"; transcript_id "TCONS_00727141"; exon_number "1"; gene_type "intronic_lncRNA";
3R	Cufflinks	exon	18356563	18356771	-	gene_id "XLOC_170381"; transcript_id "TCONS_00663580"; exon_number "1"; gene_type "intronic_lncRNA";
3R	Cufflinks	exon	18511498	18511699	-	gene_id "XLOC_170537"; transcript_id "TCONS_00727317"; exon_number "1"; gene_type "intronic_lncRNA";
3R	Cufflinks	exon	18782506	18782747	-	gene_id "XLOC_170723"; transcript_id "TCONS_00697883"; exon_number "1"; gene_type "intronic_lncRNA";
3R	Cufflinks	exon	18916877	18917115	-	gene_id "XLOC_170883"; transcript_id "TCONS_00727495"; exon_number "1"; gene_type "intronic_lncRNA";
3R	Cufflinks	exon	18950515	18950734	-	gene_id "XLOC_170911"; transcript_id "TCONS_00753914"; exon_number "1"; gene_type "intronic_lncRNA";
3R	Cufflinks	exon	19123683	19123904	-	gene_id "XLOC_171007"; transcript_id "TCONS_00753935"; exon_number "1"; gene_type "intronic_lncRNA";
3R	Cufflinks	exon	19470606	19470806	-	gene_id "XLOC_171292"; transcript_id "TCONS_00754055"; exon_number "1"; gene_type "intronic_lncRNA";
3R	Cufflinks	exon	19766253	19766463	-	gene_id "XLOC_171476"; transcript_id "TCONS_00698276"; exon_number "1"; gene_type "intronic_lncRNA";
3R	Cufflinks	exon	20175955	20176160	-	gene_id "XLOC_171766"; transcript_id "TCONS_00664404"; exon_number "1"; gene_type "lincRNA";
3R	Cufflinks	exon	20226030	20226232	-	gene_id "XLOC_171836"; transcript_id "TCONS_00664435"; exon_number "1"; gene_type "intronic_lncRNA";
3R	Cufflinks	exon	20252468	20252673	-	gene_id "XLOC_171868"; transcript_id "TCONS_00698536"; exon_number "1"; gene_type "lincRNA";
3R	Cufflinks	exon	20356383	20356583	-	gene_id "XLOC_171949"; transcript_id "TCONS_00727917"; exon_number "1"; gene_type "lincRNA";
3R	Cufflinks	exon	20790455	20790656	-	gene_id "XLOC_172298"; transcript_id "TCONS_00664767"; exon_number "1"; gene_type "intronic_lncRNA";
3R	Cufflinks	exon	21102153	21102973	-	gene_id "XLOC_172496"; transcript_id "TCONS_00664917"; exon_number "1"; gene_type "anti-sense_lncRNA";
3R	Cufflinks	exon	21705488	21705688	-	gene_id "XLOC_172924"; transcript_id "TCONS_00777293"; exon_number "1"; gene_type "intronic_lncRNA";
3R	Cufflinks	exon	22049869	22050072	-	gene_id "XLOC_173192"; transcript_id "TCONS_00728634"; exon_number "1"; gene_type "intronic_lncRNA";
3R	Cufflinks	exon	22060206	22060431	-	gene_id "XLOC_173201"; transcript_id "TCONS_00699435"; exon_number "1"; gene_type "intronic_lncRNA";
3R	Cufflinks	exon	22080751	22080954	-	gene_id "XLOC_173218"; transcript_id "TCONS_00665365"; exon_number "1"; gene_type "intronic_lncRNA";
3R	Cufflinks	exon	22338587	22338811	-	gene_id "XLOC_173368"; transcript_id "TCONS_00755046"; exon_number "1"; gene_type "intronic_lncRNA";
3R	Cufflinks	exon	22400952	22401153	-	gene_id "XLOC_173416"; transcript_id "TCONS_00699544"; exon_number "1"; gene_type "lincRNA";
3R	Cufflinks	exon	22809693	22809897	-	gene_id "XLOC_173672"; transcript_id "TCONS_00699667"; exon_number "1"; gene_type "lincRNA";
3R	Cufflinks	exon	22970021	22970221	-	gene_id "XLOC_173926"; transcript_id "TCONS_00802783"; exon_number "1"; gene_type "lincRNA";
3R	Cufflinks	exon	22974473	22974677	-	gene_id "XLOC_173933"; transcript_id "TCONS_00755266"; exon_number "1"; gene_type "lincRNA";
3R	Cufflinks	exon	23040264	23040491	-	gene_id "XLOC_173999"; transcript_id "TCONS_00729003"; exon_number "1"; gene_type "lincRNA";
3R	Cufflinks	exon	23146432	23146643	-	gene_id "XLOC_174088"; transcript_id "TCONS_00699956"; exon_number "1"; gene_type "lincRNA";
3R	Cufflinks	exon	23171014	23171237	-	gene_id "XLOC_174111"; transcript_id "TCONS_00665905"; exon_number "1"; gene_type "intronic_lncRNA";
3R	Cufflinks	exon	23171359	23172198	-	gene_id "XLOC_174111"; transcript_id "TCONS_00665905"; exon_number "2"; gene_type "intronic_lncRNA";
3R	Cufflinks	exon	23172717	23173885	-	gene_id "XLOC_174111"; transcript_id "TCONS_00665905"; exon_number "3"; gene_type "intronic_lncRNA";
3R	Cufflinks	exon	23324607	23324816	-	gene_id "XLOC_174192"; transcript_id "TCONS_00665998"; exon_number "1"; gene_type "intronic_lncRNA";
3R	Cufflinks	exon	23330029	23330257	-	gene_id "XLOC_174202"; transcript_id "TCONS_00700034"; exon_number "1"; gene_type "intronic_lncRNA";
3R	Scripture	exon	23359159	23359259	-	gene_id "XLOC_174232"; transcript_id "TCONS_00865561"; exon_number "1"; gene_type "anti-sense_lncRNA";
3R	Scripture	exon	23359589	23359693	-	gene_id "XLOC_174232"; transcript_id "TCONS_00865561"; exon_number "2"; gene_type "anti-sense_lncRNA";
3R	Cufflinks	exon	23417990	23418194	-	gene_id "XLOC_174304"; transcript_id "TCONS_00700107"; exon_number "1"; gene_type "intronic_lncRNA";
3R	Cufflinks	exon	24304707	24304925	-	gene_id "XLOC_174737"; transcript_id "TCONS_00700450"; exon_number "1"; gene_type "intronic_lncRNA";
3R	Cufflinks	exon	24468826	24469070	-	gene_id "XLOC_174896"; transcript_id "TCONS_00729585"; exon_number "1"; gene_type "lincRNA";
3R	Cufflinks	exon	24592292	24592491	-	gene_id "XLOC_174999"; transcript_id "TCONS_00729622"; exon_number "1"; gene_type "intronic_lncRNA";
3R	Cufflinks	exon	24771876	24772091	-	gene_id "XLOC_175104"; transcript_id "TCONS_00755859"; exon_number "1"; gene_type "lincRNA";
3R	Cufflinks	exon	24831648	24831854	-	gene_id "XLOC_175138"; transcript_id "TCONS_00755880"; exon_number "1"; gene_type "lincRNA";
3R	Cufflinks	exon	24845094	24845303	-	gene_id "XLOC_175153"; transcript_id "TCONS_00666703"; exon_number "1"; gene_type "intronic_lncRNA";
3R	Cufflinks	exon	25140878	25141085	-	gene_id "XLOC_175344"; transcript_id "TCONS_00700836"; exon_number "1"; gene_type "lincRNA";
3R	Scripture	exon	25266849	25267697	-	gene_id "XLOC_175464"; transcript_id "TCONS_00666900"; exon_number "1"; gene_type "anti-sense_lncRNA";
3R	Scripture	exon	25269923	25270974	-	gene_id "XLOC_175464"; transcript_id "TCONS_00666900"; exon_number "2"; gene_type "anti-sense_lncRNA";
3R	Scripture	exon	25268039	25268212	-	gene_id "XLOC_175464"; transcript_id "TCONS_00876505"; exon_number "1"; gene_type "lincRNA";
3R	Scripture	exon	25268269	25269713	-	gene_id "XLOC_175464"; transcript_id "TCONS_00876505"; exon_number "2"; gene_type "lincRNA";
3R	Cufflinks	exon	25303887	25304092	-	gene_id "XLOC_175477"; transcript_id "TCONS_00729842"; exon_number "1"; gene_type "anti-sense_lncRNA";
3R	Cufflinks	exon	25341528	25341744	-	gene_id "XLOC_175490"; transcript_id "TCONS_00666927"; exon_number "1"; gene_type "anti-sense_lncRNA";
3R	Cufflinks	exon	25661782	25662740	-	gene_id "XLOC_175631"; transcript_id "TCONS_00666995"; exon_number "1"; gene_type "anti-sense_lncRNA";
3R	Scripture	exon	25718627	25718788	-	gene_id "XLOC_175663"; transcript_id "TCONS_00884159"; exon_number "1"; gene_type "intronic_lncRNA";
3R	Scripture	exon	25719791	25719887	-	gene_id "XLOC_175663"; transcript_id "TCONS_00884159"; exon_number "2"; gene_type "intronic_lncRNA";
3R	Cufflinks	exon	25864471	25864681	-	gene_id "XLOC_175776"; transcript_id "TCONS_00730021"; exon_number "1"; gene_type "intronic_lncRNA";
3R	Cufflinks	exon	26104094	26104289	-	gene_id "XLOC_175972"; transcript_id "TCONS_00667283"; exon_number "1"; gene_type "lincRNA";
3R	Cufflinks	exon	26104353	26104409	-	gene_id "XLOC_175972"; transcript_id "TCONS_00667283"; exon_number "2"; gene_type "lincRNA";
3R	Cufflinks	exon	26121647	26121868	-	gene_id "XLOC_175980"; transcript_id "TCONS_00701303"; exon_number "1"; gene_type "intronic_lncRNA";
3R	Cufflinks	exon	26153273	26153499	-	gene_id "XLOC_176022"; transcript_id "TCONS_00756340"; exon_number "1"; gene_type "lincRNA";
3R	Cufflinks	exon	26368034	26368234	-	gene_id "XLOC_176225"; transcript_id "TCONS_00701454"; exon_number "1"; gene_type "lincRNA";
3R	Cufflinks	exon	26419569	26419774	-	gene_id "XLOC_176288"; transcript_id "TCONS_00667462"; exon_number "1"; gene_type "lincRNA";
3R	Cufflinks	exon	26529648	26530802	-	gene_id "XLOC_176390"; transcript_id "TCONS_00667501"; exon_number "1"; gene_type "intronic_lncRNA";
3R	Cufflinks	exon	26531019	26531366	-	gene_id "XLOC_176391"; transcript_id "TCONS_00667502"; exon_number "1"; gene_type "intronic_lncRNA";
3R	Cufflinks	exon	26557173	26557382	-	gene_id "XLOC_176402"; transcript_id "TCONS_00667506"; exon_number "1"; gene_type "intronic_lncRNA";
3R	Cufflinks	exon	26786700	26786910	-	gene_id "XLOC_176601"; transcript_id "TCONS_00701735"; exon_number "1"; gene_type "lincRNA";
3R	Cufflinks	exon	27070626	27070834	-	gene_id "XLOC_176743"; transcript_id "TCONS_00730507"; exon_number "1"; gene_type "lincRNA";
3R	Cufflinks	exon	27084950	27085155	-	gene_id "XLOC_176762"; transcript_id "TCONS_00667763"; exon_number "1"; gene_type "intronic_lncRNA";
3R	Cufflinks	exon	27324459	27324672	-	gene_id "XLOC_176897"; transcript_id "TCONS_00667911"; exon_number "1"; gene_type "lincRNA";
3R	Cufflinks	exon	27535686	27537486	-	gene_id "XLOC_177109"; transcript_id "TCONS_00668122"; exon_number "1"; gene_type "lincRNA";
3R	Cufflinks	exon	27537686	27537922	-	gene_id "XLOC_177109"; transcript_id "TCONS_00668122"; exon_number "2"; gene_type "lincRNA";
3R	Cufflinks	exon	27610946	27611158	-	gene_id "XLOC_177160"; transcript_id "TCONS_00668143"; exon_number "1"; gene_type "intronic_lncRNA";
3R	Cufflinks	exon	27710902	27711113	-	gene_id "XLOC_177219"; transcript_id "TCONS_00779021"; exon_number "1"; gene_type "lincRNA";
3R	Cufflinks	exon	28268505	28268704	-	gene_id "XLOC_177860"; transcript_id "TCONS_00731153"; exon_number "1"; gene_type "lincRNA";
3R	Cufflinks	exon	28271614	28271813	-	gene_id "XLOC_177867"; transcript_id "TCONS_00702625"; exon_number "1"; gene_type "lincRNA";
3R	Cufflinks	exon	28279549	28279753	-	gene_id "XLOC_177879"; transcript_id "TCONS_00702631"; exon_number "1"; gene_type "lincRNA";
3R	Cufflinks	exon	28355861	28356066	-	gene_id "XLOC_177961"; transcript_id "TCONS_00702696"; exon_number "1"; gene_type "lincRNA";
3R	Cufflinks	exon	28373123	28373344	-	gene_id "XLOC_177987"; transcript_id "TCONS_00757283"; exon_number "1"; gene_type "lincRNA";
3R	Cufflinks	exon	28958335	28958564	-	gene_id "XLOC_178542"; transcript_id "TCONS_00757520"; exon_number "1"; gene_type "intronic_lncRNA";
3R	Cufflinks	exon	28978776	28979004	-	gene_id "XLOC_178569"; transcript_id "TCONS_00668986"; exon_number "1"; gene_type "lincRNA";
3R	Cufflinks	exon	29054321	29055370	-	gene_id "XLOC_178613"; transcript_id "TCONS_00669009"; exon_number "1"; gene_type "anti-sense_lncRNA";
3R	Cufflinks	exon	29261223	29261423	-	gene_id "XLOC_178742"; transcript_id "TCONS_00703157"; exon_number "1"; gene_type "lincRNA";
3R	Cufflinks	exon	29410720	29410962	-	gene_id "XLOC_178836"; transcript_id "TCONS_00703321"; exon_number "1"; gene_type "anti-sense_lncRNA";
3R	Cufflinks	exon	29455059	29455087	-	gene_id "XLOC_178836"; transcript_id "TCONS_00703321"; exon_number "2"; gene_type "anti-sense_lncRNA";
3R	Cufflinks	exon	29455180	29455849	-	gene_id "XLOC_178836"; transcript_id "TCONS_00703321"; exon_number "3"; gene_type "anti-sense_lncRNA";
3R	Cufflinks	exon	29454823	29455087	-	gene_id "XLOC_178836"; transcript_id "TCONS_00779686"; exon_number "1"; gene_type "intronic_lncRNA";
3R	Cufflinks	exon	29455180	29455535	-	gene_id "XLOC_178836"; transcript_id "TCONS_00779686"; exon_number "2"; gene_type "intronic_lncRNA";
3R	Cufflinks	exon	29691934	29692140	-	gene_id "XLOC_179234"; transcript_id "TCONS_00731904"; exon_number "1"; gene_type "lincRNA";
3R	Cufflinks	exon	29927692	29927900	-	gene_id "XLOC_179391"; transcript_id "TCONS_00779850"; exon_number "1"; gene_type "anti-sense_lncRNA";
3R	Cufflinks	exon	30255836	30256039	-	gene_id "XLOC_179631"; transcript_id "TCONS_00669639"; exon_number "1"; gene_type "lincRNA";
3R	Cufflinks	exon	30269859	30270068	-	gene_id "XLOC_179655"; transcript_id "TCONS_00758142"; exon_number "1"; gene_type "lincRNA";
3R	Cufflinks	exon	30391206	30391415	-	gene_id "XLOC_179707"; transcript_id "TCONS_00732135"; exon_number "1"; gene_type "lincRNA";
3R	Cufflinks	exon	30405125	30405146	-	gene_id "XLOC_179716"; transcript_id "TCONS_00703841"; exon_number "1"; gene_type "lincRNA";
3R	Cufflinks	exon	30405329	30406008	-	gene_id "XLOC_179716"; transcript_id "TCONS_00703841"; exon_number "2"; gene_type "lincRNA";
3R	Cufflinks	exon	30545080	30545295	-	gene_id "XLOC_179824"; transcript_id "TCONS_00669766"; exon_number "1"; gene_type "intronic_lncRNA";
3R	Cufflinks	exon	30762307	30762634	-	gene_id "XLOC_179981"; transcript_id "TCONS_00806033"; exon_number "1"; gene_type "anti-sense_lncRNA";
3R	Cufflinks	exon	30781157	30781421	-	gene_id "XLOC_179981"; transcript_id "TCONS_00806033"; exon_number "2"; gene_type "anti-sense_lncRNA";
3R	Cufflinks	exon	30781477	30781754	-	gene_id "XLOC_179981"; transcript_id "TCONS_00806033"; exon_number "3"; gene_type "anti-sense_lncRNA";
3R	Cufflinks	exon	30783166	30783464	-	gene_id "XLOC_179981"; transcript_id "TCONS_00806033"; exon_number "4"; gene_type "anti-sense_lncRNA";
3R	Cufflinks	exon	30783538	30783910	-	gene_id "XLOC_179981"; transcript_id "TCONS_00806033"; exon_number "5"; gene_type "anti-sense_lncRNA";
3R	Scripture	exon	30779211	30780630	-	gene_id "XLOC_179981"; transcript_id "TCONS_00704133"; exon_number "1"; gene_type "intronic_lncRNA";
3R	Scripture	exon	30781157	30781421	-	gene_id "XLOC_179981"; transcript_id "TCONS_00704133"; exon_number "2"; gene_type "intronic_lncRNA";
3R	Scripture	exon	30781477	30781754	-	gene_id "XLOC_179981"; transcript_id "TCONS_00704133"; exon_number "3"; gene_type "intronic_lncRNA";
3R	Scripture	exon	30783166	30783464	-	gene_id "XLOC_179981"; transcript_id "TCONS_00704133"; exon_number "4"; gene_type "intronic_lncRNA";
3R	Scripture	exon	30783538	30783650	-	gene_id "XLOC_179981"; transcript_id "TCONS_00704133"; exon_number "5"; gene_type "intronic_lncRNA";
3R	Cufflinks	exon	30780722	30781421	-	gene_id "XLOC_179981"; transcript_id "TCONS_00669989"; exon_number "1"; gene_type "intronic_lncRNA";
3R	Cufflinks	exon	30781477	30781754	-	gene_id "XLOC_179981"; transcript_id "TCONS_00669989"; exon_number "2"; gene_type "intronic_lncRNA";
3R	Cufflinks	exon	30783166	30783464	-	gene_id "XLOC_179981"; transcript_id "TCONS_00669989"; exon_number "3"; gene_type "intronic_lncRNA";
3R	Cufflinks	exon	30783538	30783647	-	gene_id "XLOC_179981"; transcript_id "TCONS_00669989"; exon_number "4"; gene_type "intronic_lncRNA";
3R	Scripture	exon	30780980	30781421	-	gene_id "XLOC_179981"; transcript_id "TCONS_00895425"; exon_number "1"; gene_type "intronic_lncRNA";
3R	Scripture	exon	30781477	30781729	-	gene_id "XLOC_179981"; transcript_id "TCONS_00895425"; exon_number "2"; gene_type "intronic_lncRNA";
3R	Scripture	exon	30783166	30783464	-	gene_id "XLOC_179981"; transcript_id "TCONS_00895425"; exon_number "3"; gene_type "intronic_lncRNA";
3R	Scripture	exon	30783538	30783650	-	gene_id "XLOC_179981"; transcript_id "TCONS_00895425"; exon_number "4"; gene_type "intronic_lncRNA";
3R	Cufflinks	exon	30830139	30830356	-	gene_id "XLOC_180008"; transcript_id "TCONS_00704139"; exon_number "1"; gene_type "intronic_lncRNA";
3R	Cufflinks	exon	30891622	30892152	-	gene_id "XLOC_180073"; transcript_id "TCONS_00670054"; exon_number "1"; gene_type "lincRNA";
3R	Cufflinks	exon	30893374	30893499	-	gene_id "XLOC_180073"; transcript_id "TCONS_00670054"; exon_number "2"; gene_type "lincRNA";
3R	Cufflinks	exon	30891748	30892152	-	gene_id "XLOC_180073"; transcript_id "TCONS_00670053"; exon_number "1"; gene_type "lincRNA";
3R	Cufflinks	exon	30893069	30893499	-	gene_id "XLOC_180073"; transcript_id "TCONS_00670053"; exon_number "2"; gene_type "lincRNA";
3R	Scripture	exon	30891749	30891811	-	gene_id "XLOC_180073"; transcript_id "TCONS_00806098"; exon_number "1"; gene_type "lincRNA";
3R	Scripture	exon	30891909	30892152	-	gene_id "XLOC_180073"; transcript_id "TCONS_00806098"; exon_number "2"; gene_type "lincRNA";
3R	Scripture	exon	30893374	30893499	-	gene_id "XLOC_180073"; transcript_id "TCONS_00806098"; exon_number "3"; gene_type "lincRNA";
3R	Cufflinks	exon	30891783	30891811	-	gene_id "XLOC_180073"; transcript_id "TCONS_00732432"; exon_number "1"; gene_type "lincRNA";
3R	Cufflinks	exon	30891909	30892583	-	gene_id "XLOC_180073"; transcript_id "TCONS_00732432"; exon_number "2"; gene_type "lincRNA";
3R	Cufflinks	exon	31217362	31217657	-	gene_id "XLOC_180380"; transcript_id "TCONS_00670281"; exon_number "1"; gene_type "intronic_lncRNA";
3R	Cufflinks	exon	31419806	31420010	-	gene_id "XLOC_180542"; transcript_id "TCONS_00704510"; exon_number "1"; gene_type "intronic_lncRNA";
3R	Cufflinks	exon	31483431	31483635	-	gene_id "XLOC_180589"; transcript_id "TCONS_00670388"; exon_number "1"; gene_type "lincRNA";
3R	Scripture	exon	31587997	31588471	-	gene_id "XLOC_180681"; transcript_id "TCONS_00884502"; exon_number "1"; gene_type "anti-sense_lncRNA";
3R	Scripture	exon	31592016	31593032	-	gene_id "XLOC_180681"; transcript_id "TCONS_00884502"; exon_number "2"; gene_type "anti-sense_lncRNA";
3R	Scripture	exon	31589346	31590283	-	gene_id "XLOC_180681"; transcript_id "TCONS_00866737"; exon_number "1"; gene_type "anti-sense_lncRNA";
3R	Scripture	exon	31590341	31592330	-	gene_id "XLOC_180681"; transcript_id "TCONS_00866737"; exon_number "2"; gene_type "anti-sense_lncRNA";
3R	Cufflinks	exon	32010638	32010675	-	gene_id "XLOC_180802"; transcript_id "TCONS_00704757"; exon_number "1"; gene_type "intronic_lncRNA";
3R	Cufflinks	exon	32010776	32010997	-	gene_id "XLOC_180802"; transcript_id "TCONS_00704757"; exon_number "2"; gene_type "intronic_lncRNA";
4	Cufflinks	exon	56921	57411	+	gene_id "XLOC_186025"; transcript_id "TCONS_00911200"; exon_number "1"; gene_type "anti-sense_lncRNA";
4	Cufflinks	exon	59976	60570	+	gene_id "XLOC_186025"; transcript_id "TCONS_00911200"; exon_number "2"; gene_type "anti-sense_lncRNA";
4	Cufflinks	exon	56921	57411	+	gene_id "XLOC_186025"; transcript_id "TCONS_00911199"; exon_number "1"; gene_type "anti-sense_lncRNA";
4	Cufflinks	exon	59976	60415	+	gene_id "XLOC_186025"; transcript_id "TCONS_00911199"; exon_number "2"; gene_type "anti-sense_lncRNA";
4	Cufflinks	exon	60570	60570	+	gene_id "XLOC_186025"; transcript_id "TCONS_00911199"; exon_number "3"; gene_type "anti-sense_lncRNA";
4	Scripture	exon	454949	455942	+	gene_id "XLOC_186036"; transcript_id "TCONS_00927213"; exon_number "1"; gene_type "anti-sense_lncRNA";
4	Scripture	exon	460056	460520	+	gene_id "XLOC_186036"; transcript_id "TCONS_00927213"; exon_number "2"; gene_type "anti-sense_lncRNA";
4	Scripture	exon	457890	459907	+	gene_id "XLOC_186036"; transcript_id "TCONS_00918065"; exon_number "1"; gene_type "anti-sense_lncRNA";
4	Scripture	exon	460056	460563	+	gene_id "XLOC_186036"; transcript_id "TCONS_00918065"; exon_number "2"; gene_type "anti-sense_lncRNA";
4	Scripture	exon	460574	460608	+	gene_id "XLOC_186036"; transcript_id "TCONS_00918067"; exon_number "1"; gene_type "anti-sense_lncRNA";
4	Scripture	exon	460729	461619	+	gene_id "XLOC_186036"; transcript_id "TCONS_00918067"; exon_number "2"; gene_type "anti-sense_lncRNA";
4	Cufflinks	exon	285960	286170	+	gene_id "XLOC_186100"; transcript_id "TCONS_00912264"; exon_number "1"; gene_type "intronic_lncRNA";
4	Cufflinks	exon	380790	380811	+	gene_id "XLOC_186132"; transcript_id "TCONS_00912278"; exon_number "1"; gene_type "intronic_lncRNA";
4	Cufflinks	exon	381045	381367	+	gene_id "XLOC_186132"; transcript_id "TCONS_00912278"; exon_number "2"; gene_type "intronic_lncRNA";
4	Cufflinks	exon	427064	427711	+	gene_id "XLOC_186174"; transcript_id "TCONS_00913096"; exon_number "1"; gene_type "lincRNA";
4	Cufflinks	exon	429437	432017	+	gene_id "XLOC_186174"; transcript_id "TCONS_00913096"; exon_number "2"; gene_type "lincRNA";
4	Cufflinks	exon	427432	427711	+	gene_id "XLOC_186174"; transcript_id "TCONS_00911366"; exon_number "1"; gene_type "lincRNA";
4	Cufflinks	exon	429497	432009	+	gene_id "XLOC_186174"; transcript_id "TCONS_00911366"; exon_number "2"; gene_type "lincRNA";
4	Cufflinks	exon	550046	550273	+	gene_id "XLOC_186240"; transcript_id "TCONS_00912364"; exon_number "1"; gene_type "intronic_lncRNA";
4	Cufflinks	exon	553949	554151	+	gene_id "XLOC_186241"; transcript_id "TCONS_00911430"; exon_number "1"; gene_type "intronic_lncRNA";
4	Scripture	exon	878851	879943	+	gene_id "XLOC_186340"; transcript_id "TCONS_00918514"; exon_number "1"; gene_type "anti-sense_lncRNA";
4	Scripture	exon	884564	884698	+	gene_id "XLOC_186340"; transcript_id "TCONS_00918514"; exon_number "2"; gene_type "anti-sense_lncRNA";
4	Scripture	exon	878851	879450	+	gene_id "XLOC_186340"; transcript_id "TCONS_00918513"; exon_number "1"; gene_type "anti-sense_lncRNA";
4	Scripture	exon	884564	884740	+	gene_id "XLOC_186340"; transcript_id "TCONS_00918513"; exon_number "2"; gene_type "anti-sense_lncRNA";
4	Scripture	exon	883143	883497	+	gene_id "XLOC_186340"; transcript_id "TCONS_00924714"; exon_number "1"; gene_type "anti-sense_lncRNA";
4	Scripture	exon	883570	884120	+	gene_id "XLOC_186340"; transcript_id "TCONS_00924714"; exon_number "2"; gene_type "anti-sense_lncRNA";
4	Scripture	exon	884046	884705	+	gene_id "XLOC_186340"; transcript_id "TCONS_00924717"; exon_number "1"; gene_type "intronic_lncRNA";
4	Scripture	exon	1027677	1028328	+	gene_id "XLOC_186391"; transcript_id "TCONS_00912513"; exon_number "1"; gene_type "anti-sense_lncRNA";
4	Scripture	exon	1028710	1030062	+	gene_id "XLOC_186391"; transcript_id "TCONS_00912513"; exon_number "2"; gene_type "anti-sense_lncRNA";
4	Scripture	exon	1027715	1027882	+	gene_id "XLOC_186391"; transcript_id "TCONS_00911614"; exon_number "1"; gene_type "anti-sense_lncRNA";
4	Scripture	exon	1028710	1030062	+	gene_id "XLOC_186391"; transcript_id "TCONS_00911614"; exon_number "2"; gene_type "anti-sense_lncRNA";
4	Cufflinks	exon	1255484	1255720	+	gene_id "XLOC_186465"; transcript_id "TCONS_00912590"; exon_number "1"; gene_type "intronic_lncRNA";
4	Cufflinks	exon	1278768	1280424	+	gene_id "XLOC_186478"; transcript_id "TCONS_00915770"; exon_number "1"; gene_type "lincRNA";
4	Cufflinks	exon	1280494	1280856	+	gene_id "XLOC_186478"; transcript_id "TCONS_00915770"; exon_number "2"; gene_type "lincRNA";
4	Cufflinks	exon	1280916	1281456	+	gene_id "XLOC_186478"; transcript_id "TCONS_00915770"; exon_number "3"; gene_type "lincRNA";
4	Cufflinks	exon	1278768	1280424	+	gene_id "XLOC_186478"; transcript_id "TCONS_00912597"; exon_number "1"; gene_type "lincRNA";
4	Cufflinks	exon	1280494	1280670	+	gene_id "XLOC_186478"; transcript_id "TCONS_00912597"; exon_number "2"; gene_type "lincRNA";
4	Cufflinks	exon	1280761	1280856	+	gene_id "XLOC_186478"; transcript_id "TCONS_00912597"; exon_number "3"; gene_type "lincRNA";
4	Cufflinks	exon	1280916	1281456	+	gene_id "XLOC_186478"; transcript_id "TCONS_00912597"; exon_number "4"; gene_type "lincRNA";
4	Cufflinks	exon	1278784	1279560	+	gene_id "XLOC_186478"; transcript_id "TCONS_00911709"; exon_number "1"; gene_type "lincRNA";
4	Cufflinks	exon	1279625	1279635	+	gene_id "XLOC_186478"; transcript_id "TCONS_00911709"; exon_number "2"; gene_type "lincRNA";
4	Cufflinks	exon	1295028	1295260	+	gene_id "XLOC_186484"; transcript_id "TCONS_00911712"; exon_number "1"; gene_type "lincRNA";
4	Cufflinks	exon	181439	181516	-	gene_id "XLOC_186547"; transcript_id "TCONS_00912651"; exon_number "1"; gene_type "lincRNA";
4	Cufflinks	exon	181569	182300	-	gene_id "XLOC_186547"; transcript_id "TCONS_00912651"; exon_number "2"; gene_type "lincRNA";
4	Cufflinks	exon	181439	181509	-	gene_id "XLOC_186547"; transcript_id "TCONS_00911767"; exon_number "1"; gene_type "lincRNA";
4	Cufflinks	exon	181569	182300	-	gene_id "XLOC_186547"; transcript_id "TCONS_00911767"; exon_number "2"; gene_type "lincRNA";
4	Cufflinks	exon	1125443	1125671	-	gene_id "XLOC_186922"; transcript_id "TCONS_00916781"; exon_number "1"; gene_type "lincRNA";
4	Cufflinks	exon	1247312	1247517	-	gene_id "XLOC_186959"; transcript_id "TCONS_00916090"; exon_number "1"; gene_type "intronic_lncRNA";
Unmapped_Scaffold_28_D1723	Cufflinks	exon	8937	9216	+	gene_id "XLOC_187412"; transcript_id "TCONS_00937083"; exon_number "1"; gene_type "lincRNA";
Unmapped_Scaffold_29_D1705	Cufflinks	exon	3842	4147	-	gene_id "XLOC_187421"; transcript_id "TCONS_00937092"; exon_number "1"; gene_type "lincRNA";
Unmapped_Scaffold_37_D1608	Cufflinks	exon	3017	3528	-	gene_id "XLOC_187439"; transcript_id "TCONS_00937175"; exon_number "1"; gene_type "lincRNA";
Unmapped_Scaffold_37_D1608	Cufflinks	exon	13557	15866	-	gene_id "XLOC_187439"; transcript_id "TCONS_00937175"; exon_number "2"; gene_type "lincRNA";
X	Scripture	exon	258893	259690	+	gene_id "XLOC_187707"; transcript_id "TCONS_01082600"; exon_number "1"; gene_type "anti-sense_lncRNA";
X	Scripture	exon	259754	263005	+	gene_id "XLOC_187707"; transcript_id "TCONS_01082600"; exon_number "2"; gene_type "anti-sense_lncRNA";
X	Cufflinks	exon	544274	544492	+	gene_id "XLOC_187919"; transcript_id "TCONS_00938312"; exon_number "1"; gene_type "intronic_lncRNA";
X	Cufflinks	exon	673000	673223	+	gene_id "XLOC_187974"; transcript_id "TCONS_00938372"; exon_number "1"; gene_type "lincRNA";
X	Cufflinks	exon	865385	865588	+	gene_id "XLOC_188047"; transcript_id "TCONS_00960819"; exon_number "1"; gene_type "intronic_lncRNA";
X	Cufflinks	exon	874224	874424	+	gene_id "XLOC_188056"; transcript_id "TCONS_00960826"; exon_number "1"; gene_type "intronic_lncRNA";
X	Cufflinks	exon	1083772	1083994	+	gene_id "XLOC_188187"; transcript_id "TCONS_00938545"; exon_number "1"; gene_type "intronic_lncRNA";
X	Cufflinks	exon	1084690	1084943	+	gene_id "XLOC_188189"; transcript_id "TCONS_01019375"; exon_number "1"; gene_type "intronic_lncRNA";
X	Cufflinks	exon	1088274	1088476	+	gene_id "XLOC_188198"; transcript_id "TCONS_00938549"; exon_number "1"; gene_type "intronic_lncRNA";
X	Cufflinks	exon	1128786	1128985	+	gene_id "XLOC_188242"; transcript_id "TCONS_00960962"; exon_number "1"; gene_type "intronic_lncRNA";
X	Cufflinks	exon	1314475	1314676	+	gene_id "XLOC_188361"; transcript_id "TCONS_01019484"; exon_number "1"; gene_type "intronic_lncRNA";
X	Cufflinks	exon	1570802	1571019	+	gene_id "XLOC_188491"; transcript_id "TCONS_00961187"; exon_number "1"; gene_type "intronic_lncRNA";
X	Cufflinks	exon	1708139	1708343	+	gene_id "XLOC_188619"; transcript_id "TCONS_00938938"; exon_number "1"; gene_type "lincRNA";
X	Scripture	exon	2069876	2070203	+	gene_id "XLOC_188797"; transcript_id "TCONS_01082857"; exon_number "1"; gene_type "anti-sense_lncRNA";
X	Scripture	exon	2070273	2071580	+	gene_id "XLOC_188797"; transcript_id "TCONS_01082857"; exon_number "2"; gene_type "anti-sense_lncRNA";
X	Cufflinks	exon	2320624	2320833	+	gene_id "XLOC_188883"; transcript_id "TCONS_00939205"; exon_number "1"; gene_type "intronic_lncRNA";
X	Cufflinks	exon	2332356	2332564	+	gene_id "XLOC_188898"; transcript_id "TCONS_00939222"; exon_number "1"; gene_type "anti-sense_lncRNA";
X	Cufflinks	exon	2351874	2352099	+	gene_id "XLOC_188908"; transcript_id "TCONS_00961507"; exon_number "1"; gene_type "intronic_lncRNA";
X	Cufflinks	exon	2353435	2353645	+	gene_id "XLOC_188910"; transcript_id "TCONS_00961508"; exon_number "1"; gene_type "intronic_lncRNA";
X	Cufflinks	exon	2496639	2496850	+	gene_id "XLOC_189007"; transcript_id "TCONS_00939283"; exon_number "1"; gene_type "intronic_lncRNA";
X	Cufflinks	exon	2757373	2757578	+	gene_id "XLOC_189118"; transcript_id "TCONS_00961656"; exon_number "1"; gene_type "intronic_lncRNA";
X	Cufflinks	exon	2958152	2958368	+	gene_id "XLOC_189357"; transcript_id "TCONS_00939575"; exon_number "1"; gene_type "anti-sense_lncRNA";
X	Cufflinks	exon	2991150	2991356	+	gene_id "XLOC_189396"; transcript_id "TCONS_00939597"; exon_number "1"; gene_type "intronic_lncRNA";
X	Cufflinks	exon	3012475	3012676	+	gene_id "XLOC_189424"; transcript_id "TCONS_00961875"; exon_number "1"; gene_type "intronic_lncRNA";
X	Cufflinks	exon	3301079	3301301	+	gene_id "XLOC_189716"; transcript_id "TCONS_00939787"; exon_number "1"; gene_type "intronic_lncRNA";
X	Cufflinks	exon	3347141	3347195	+	gene_id "XLOC_189747"; transcript_id "TCONS_00985240"; exon_number "1"; gene_type "lincRNA";
X	Cufflinks	exon	3348663	3348907	+	gene_id "XLOC_189747"; transcript_id "TCONS_00985240"; exon_number "2"; gene_type "lincRNA";
X	Cufflinks	exon	3522550	3522791	+	gene_id "XLOC_189798"; transcript_id "TCONS_00939948"; exon_number "1"; gene_type "anti-sense_lncRNA";
X	Cufflinks	exon	3530322	3530386	+	gene_id "XLOC_189798"; transcript_id "TCONS_00939948"; exon_number "2"; gene_type "anti-sense_lncRNA";
X	Cufflinks	exon	3543264	3543466	+	gene_id "XLOC_189909"; transcript_id "TCONS_01034267"; exon_number "1"; gene_type "intronic_lncRNA";
X	Cufflinks	exon	3562963	3563164	+	gene_id "XLOC_189941"; transcript_id "TCONS_00985378"; exon_number "1"; gene_type "anti-sense_lncRNA";
X	Cufflinks	exon	4087585	4087807	+	gene_id "XLOC_190248"; transcript_id "TCONS_01003980"; exon_number "1"; gene_type "intronic_lncRNA";
X	Cufflinks	exon	4573104	4573175	+	gene_id "XLOC_190700"; transcript_id "TCONS_01051683"; exon_number "1"; gene_type "lincRNA";
X	Cufflinks	exon	4573271	4573534	+	gene_id "XLOC_190700"; transcript_id "TCONS_01051683"; exon_number "2"; gene_type "lincRNA";
X	Cufflinks	exon	4592409	4592608	+	gene_id "XLOC_190728"; transcript_id "TCONS_01051698"; exon_number "1"; gene_type "lincRNA";
X	Cufflinks	exon	4742038	4742246	+	gene_id "XLOC_190810"; transcript_id "TCONS_00963121"; exon_number "1"; gene_type "lincRNA";
X	Cufflinks	exon	5019676	5019883	+	gene_id "XLOC_191121"; transcript_id "TCONS_01004478"; exon_number "1"; gene_type "lincRNA";
X	Cufflinks	exon	5215737	5216192	+	gene_id "XLOC_191170"; transcript_id "TCONS_00941013"; exon_number "1"; gene_type "intronic_lncRNA";
X	Cufflinks	exon	5464966	5465242	+	gene_id "XLOC_191398"; transcript_id "TCONS_00941175"; exon_number "1"; gene_type "intronic_lncRNA";
X	Cufflinks	exon	6024947	6025151	+	gene_id "XLOC_191850"; transcript_id "TCONS_00986570"; exon_number "1"; gene_type "lincRNA";
X	Cufflinks	exon	6033189	6033418	+	gene_id "XLOC_191865"; transcript_id "TCONS_00963876"; exon_number "1"; gene_type "lincRNA";
X	Cufflinks	exon	6736394	6736686	+	gene_id "XLOC_192320"; transcript_id "TCONS_00986763"; exon_number "1"; gene_type "intronic_lncRNA";
X	Cufflinks	exon	6748740	6748940	+	gene_id "XLOC_192342"; transcript_id "TCONS_00964122"; exon_number "1"; gene_type "intronic_lncRNA";
X	Cufflinks	exon	6750627	6750882	+	gene_id "XLOC_192347"; transcript_id "TCONS_00941729"; exon_number "1"; gene_type "intronic_lncRNA";
X	Cufflinks	exon	6800860	6801059	+	gene_id "XLOC_192371"; transcript_id "TCONS_00964141"; exon_number "1"; gene_type "intronic_lncRNA";
X	Cufflinks	exon	6979235	6979443	+	gene_id "XLOC_192536"; transcript_id "TCONS_00986870"; exon_number "1"; gene_type "intronic_lncRNA";
X	Cufflinks	exon	7375990	7376250	+	gene_id "XLOC_192828"; transcript_id "TCONS_00986987"; exon_number "1"; gene_type "intronic_lncRNA";
X	Cufflinks	exon	7404668	7404900	+	gene_id "XLOC_192871"; transcript_id "TCONS_00964439"; exon_number "1"; gene_type "intronic_lncRNA";
X	Cufflinks	exon	7521252	7521467	+	gene_id "XLOC_193050"; transcript_id "TCONS_00942143"; exon_number "1"; gene_type "intronic_lncRNA";
X	Cufflinks	exon	8331423	8331663	+	gene_id "XLOC_193775"; transcript_id "TCONS_00987475"; exon_number "1"; gene_type "intronic_lncRNA";
X	Cufflinks	exon	8353467	8353669	+	gene_id "XLOC_193808"; transcript_id "TCONS_00965027"; exon_number "1"; gene_type "intronic_lncRNA";
X	Cufflinks	exon	8638117	8638323	+	gene_id "XLOC_194015"; transcript_id "TCONS_00942665"; exon_number "1"; gene_type "intronic_lncRNA";
X	Cufflinks	exon	8651283	8651506	+	gene_id "XLOC_194038"; transcript_id "TCONS_00942673"; exon_number "1"; gene_type "lincRNA";
X	Cufflinks	exon	8771703	8771910	+	gene_id "XLOC_194202"; transcript_id "TCONS_00942738"; exon_number "1"; gene_type "intronic_lncRNA";
X	Cufflinks	exon	9126383	9126596	+	gene_id "XLOC_194524"; transcript_id "TCONS_00942865"; exon_number "1"; gene_type "intronic_lncRNA";
X	Scripture	exon	9133940	9134190	+	gene_id "XLOC_194531"; transcript_id "TCONS_01108968"; exon_number "1"; gene_type "anti-sense_lncRNA";
X	Scripture	exon	9134983	9135211	+	gene_id "XLOC_194531"; transcript_id "TCONS_01108968"; exon_number "2"; gene_type "anti-sense_lncRNA";
X	Cufflinks	exon	9528188	9528413	+	gene_id "XLOC_194801"; transcript_id "TCONS_00943003"; exon_number "1"; gene_type "intronic_lncRNA";
X	Cufflinks	exon	9689009	9689219	+	gene_id "XLOC_194878"; transcript_id "TCONS_01053371"; exon_number "1"; gene_type "lincRNA";
X	Cufflinks	exon	9764496	9764707	+	gene_id "XLOC_194996"; transcript_id "TCONS_00965635"; exon_number "1"; gene_type "lincRNA";
X	Cufflinks	exon	9869414	9869625	+	gene_id "XLOC_195065"; transcript_id "TCONS_00965671"; exon_number "1"; gene_type "lincRNA";
X	Cufflinks	exon	9870778	9870985	+	gene_id "XLOC_195066"; transcript_id "TCONS_00965672"; exon_number "1"; gene_type "lincRNA";
X	Cufflinks	exon	10181342	10181542	+	gene_id "XLOC_195394"; transcript_id "TCONS_00965886"; exon_number "1"; gene_type "intronic_lncRNA";
X	Cufflinks	exon	10655921	10656125	+	gene_id "XLOC_195671"; transcript_id "TCONS_01037006"; exon_number "1"; gene_type "intronic_lncRNA";
X	Cufflinks	exon	10753873	10754074	+	gene_id "XLOC_195738"; transcript_id "TCONS_01053755"; exon_number "1"; gene_type "intronic_lncRNA";
X	Cufflinks	exon	10893210	10893440	+	gene_id "XLOC_195802"; transcript_id "TCONS_01006460"; exon_number "1"; gene_type "lincRNA";
X	Cufflinks	exon	10893507	10893690	+	gene_id "XLOC_195802"; transcript_id "TCONS_01006460"; exon_number "2"; gene_type "lincRNA";
X	Cufflinks	exon	11079376	11079604	+	gene_id "XLOC_196001"; transcript_id "TCONS_00966240"; exon_number "1"; gene_type "intronic_lncRNA";
X	Cufflinks	exon	11189965	11190185	+	gene_id "XLOC_196039"; transcript_id "TCONS_00943779"; exon_number "1"; gene_type "lincRNA";
X	Cufflinks	exon	11416697	11416901	+	gene_id "XLOC_196193"; transcript_id "TCONS_01006651"; exon_number "1"; gene_type "anti-sense_lncRNA";
X	Scripture	exon	11805106	11805840	+	gene_id "XLOC_196309"; transcript_id "TCONS_01109389"; exon_number "1"; gene_type "intronic_lncRNA";
X	Scripture	exon	11806047	11806610	+	gene_id "XLOC_196309"; transcript_id "TCONS_01109389"; exon_number "2"; gene_type "intronic_lncRNA";
X	Cufflinks	exon	11875815	11876393	+	gene_id "XLOC_196331"; transcript_id "TCONS_00943984"; exon_number "1"; gene_type "anti-sense_lncRNA";
X	Cufflinks	exon	11876464	11876999	+	gene_id "XLOC_196331"; transcript_id "TCONS_00943984"; exon_number "2"; gene_type "anti-sense_lncRNA";
X	Cufflinks	exon	12085009	12085211	+	gene_id "XLOC_196488"; transcript_id "TCONS_01037408"; exon_number "1"; gene_type "intronic_lncRNA";
X	Cufflinks	exon	12182190	12182411	+	gene_id "XLOC_196643"; transcript_id "TCONS_01022786"; exon_number "1"; gene_type "intronic_lncRNA";
X	Cufflinks	exon	12383048	12383253	+	gene_id "XLOC_196960"; transcript_id "TCONS_00966836"; exon_number "1"; gene_type "lincRNA";
X	Cufflinks	exon	12387319	12387524	+	gene_id "XLOC_196963"; transcript_id "TCONS_00944271"; exon_number "1"; gene_type "lincRNA";
X	Cufflinks	exon	12423559	12423782	+	gene_id "XLOC_197022"; transcript_id "TCONS_00966876"; exon_number "1"; gene_type "lincRNA";
X	Cufflinks	exon	12622257	12622364	+	gene_id "XLOC_197151"; transcript_id "TCONS_01022977"; exon_number "1"; gene_type "lincRNA";
X	Cufflinks	exon	12622424	12622829	+	gene_id "XLOC_197151"; transcript_id "TCONS_01022977"; exon_number "2"; gene_type "lincRNA";
X	Cufflinks	exon	12837912	12838178	+	gene_id "XLOC_197228"; transcript_id "TCONS_00988991"; exon_number "1"; gene_type "intronic_lncRNA";
X	Cufflinks	exon	12890240	12890440	+	gene_id "XLOC_197281"; transcript_id "TCONS_01007090"; exon_number "1"; gene_type "intronic_lncRNA";
X	Cufflinks	exon	13228577	13228805	+	gene_id "XLOC_197575"; transcript_id "TCONS_00944647"; exon_number "1"; gene_type "intronic_lncRNA";
X	Cufflinks	exon	13327036	13327247	+	gene_id "XLOC_197639"; transcript_id "TCONS_00944688"; exon_number "1"; gene_type "intronic_lncRNA";
X	Cufflinks	exon	13604468	13604670	+	gene_id "XLOC_197920"; transcript_id "TCONS_00944855"; exon_number "1"; gene_type "lincRNA";
X	Cufflinks	exon	13604898	13605222	+	gene_id "XLOC_197920"; transcript_id "TCONS_00944855"; exon_number "2"; gene_type "lincRNA";
X	Scripture	exon	13755253	13755470	+	gene_id "XLOC_197949"; transcript_id "TCONS_01093661"; exon_number "1"; gene_type "anti-sense_lncRNA";
X	Scripture	exon	13755850	13755980	+	gene_id "XLOC_197949"; transcript_id "TCONS_01093661"; exon_number "2"; gene_type "anti-sense_lncRNA";
X	Cufflinks	exon	13887487	13887686	+	gene_id "XLOC_197979"; transcript_id "TCONS_00967478"; exon_number "1"; gene_type "intronic_lncRNA";
X	Cufflinks	exon	13937546	13937773	+	gene_id "XLOC_198032"; transcript_id "TCONS_00967501"; exon_number "1"; gene_type "intronic_lncRNA";
X	Cufflinks	exon	13983199	13983430	+	gene_id "XLOC_198073"; transcript_id "TCONS_00967525"; exon_number "1"; gene_type "intronic_lncRNA";
X	Cufflinks	exon	14070655	14070858	+	gene_id "XLOC_198169"; transcript_id "TCONS_00967571"; exon_number "1"; gene_type "lincRNA";
X	Cufflinks	exon	14091813	14092030	+	gene_id "XLOC_198208"; transcript_id "TCONS_00967593"; exon_number "1"; gene_type "lincRNA";
X	Cufflinks	exon	14371581	14371781	+	gene_id "XLOC_198495"; transcript_id "TCONS_00945202"; exon_number "1"; gene_type "intronic_lncRNA";
X	Cufflinks	exon	14414573	14414802	+	gene_id "XLOC_198572"; transcript_id "TCONS_00967841"; exon_number "1"; gene_type "intronic_lncRNA";
X	Cufflinks	exon	14733721	14733939	+	gene_id "XLOC_198996"; transcript_id "TCONS_01007775"; exon_number "1"; gene_type "intronic_lncRNA";
X	Cufflinks	exon	14787651	14787881	+	gene_id "XLOC_199057"; transcript_id "TCONS_00945426"; exon_number "1"; gene_type "anti-sense_lncRNA";
X	Cufflinks	exon	15209600	15209802	+	gene_id "XLOC_199392"; transcript_id "TCONS_00968360"; exon_number "1"; gene_type "lincRNA";
X	Cufflinks	exon	15614118	15614328	+	gene_id "XLOC_199781"; transcript_id "TCONS_00968537"; exon_number "1"; gene_type "intronic_lncRNA";
X	Cufflinks	exon	15630015	15630687	+	gene_id "XLOC_199797"; transcript_id "TCONS_00945880"; exon_number "1"; gene_type "intronic_lncRNA";
X	Cufflinks	exon	15630754	15630984	+	gene_id "XLOC_199797"; transcript_id "TCONS_00945880"; exon_number "2"; gene_type "intronic_lncRNA";
X	Cufflinks	exon	16205891	16206093	+	gene_id "XLOC_200175"; transcript_id "TCONS_00968766"; exon_number "1"; gene_type "lincRNA";
X	Cufflinks	exon	16261399	16261629	+	gene_id "XLOC_200245"; transcript_id "TCONS_00968821"; exon_number "1"; gene_type "lincRNA";
X	Scripture	exon	16293565	16293831	+	gene_id "XLOC_200259"; transcript_id "TCONS_00968826"; exon_number "1"; gene_type "anti-sense_lncRNA";
X	Scripture	exon	16293902	16294040	+	gene_id "XLOC_200259"; transcript_id "TCONS_00968826"; exon_number "2"; gene_type "anti-sense_lncRNA";
X	Cufflinks	exon	16831873	16832079	+	gene_id "XLOC_200490"; transcript_id "TCONS_00946308"; exon_number "1"; gene_type "intronic_lncRNA";
X	Cufflinks	exon	17762864	17763079	+	gene_id "XLOC_201255"; transcript_id "TCONS_00969385"; exon_number "1"; gene_type "lincRNA";
X	Cufflinks	exon	17786542	17786763	+	gene_id "XLOC_201289"; transcript_id "TCONS_00969415"; exon_number "1"; gene_type "lincRNA";
X	Cufflinks	exon	18053533	18053756	+	gene_id "XLOC_201516"; transcript_id "TCONS_00969526"; exon_number "1"; gene_type "intronic_lncRNA";
X	Cufflinks	exon	18154625	18154843	+	gene_id "XLOC_201602"; transcript_id "TCONS_00969590"; exon_number "1"; gene_type "lincRNA";
X	Cufflinks	exon	18401749	18401950	+	gene_id "XLOC_201889"; transcript_id "TCONS_01008914"; exon_number "1"; gene_type "intronic_lncRNA";
X	Cufflinks	exon	18702563	18702720	+	gene_id "XLOC_202177"; transcript_id "TCONS_00947279"; exon_number "1"; gene_type "lincRNA";
X	Cufflinks	exon	18702896	18703395	+	gene_id "XLOC_202177"; transcript_id "TCONS_00947279"; exon_number "2"; gene_type "lincRNA";
X	Cufflinks	exon	18723593	18723842	+	gene_id "XLOC_202210"; transcript_id "TCONS_00947292"; exon_number "1"; gene_type "intronic_lncRNA";
X	Cufflinks	exon	18912346	18912500	+	gene_id "XLOC_202310"; transcript_id "TCONS_00970043"; exon_number "1"; gene_type "lincRNA";
X	Cufflinks	exon	18912585	18912976	+	gene_id "XLOC_202310"; transcript_id "TCONS_00970043"; exon_number "2"; gene_type "lincRNA";
X	Cufflinks	exon	19073129	19073337	+	gene_id "XLOC_202399"; transcript_id "TCONS_00970111"; exon_number "1"; gene_type "lincRNA";
X	Cufflinks	exon	19130891	19131100	+	gene_id "XLOC_202491"; transcript_id "TCONS_00970168"; exon_number "1"; gene_type "lincRNA";
X	Cufflinks	exon	19229510	19229720	+	gene_id "XLOC_202552"; transcript_id "TCONS_00991528"; exon_number "1"; gene_type "intronic_lncRNA";
X	Cufflinks	exon	19299094	19299299	+	gene_id "XLOC_202580"; transcript_id "TCONS_01040090"; exon_number "1"; gene_type "lincRNA";
X	Cufflinks	exon	19355117	19355352	+	gene_id "XLOC_202620"; transcript_id "TCONS_01024902"; exon_number "1"; gene_type "intronic_lncRNA";
X	Cufflinks	exon	19453586	19453876	+	gene_id "XLOC_202649"; transcript_id "TCONS_00970275"; exon_number "1"; gene_type "intronic_lncRNA";
X	Cufflinks	exon	20263239	20263448	+	gene_id "XLOC_203202"; transcript_id "TCONS_00970559"; exon_number "1"; gene_type "lincRNA";
X	Cufflinks	exon	20375043	20375264	+	gene_id "XLOC_203380"; transcript_id "TCONS_01056768"; exon_number "1"; gene_type "lincRNA";
X	Cufflinks	exon	20483957	20484163	+	gene_id "XLOC_203455"; transcript_id "TCONS_01040409"; exon_number "1"; gene_type "intronic_lncRNA";
X	Cufflinks	exon	20498981	20499203	+	gene_id "XLOC_203465"; transcript_id "TCONS_00948022"; exon_number "1"; gene_type "intronic_lncRNA";
X	Cufflinks	exon	20736933	20737138	+	gene_id "XLOC_203863"; transcript_id "TCONS_00992105"; exon_number "1"; gene_type "lincRNA";
X	Cufflinks	exon	20873631	20873870	+	gene_id "XLOC_204018"; transcript_id "TCONS_01056965"; exon_number "1"; gene_type "intronic_lncRNA";
X	Cufflinks	exon	20895299	20895506	+	gene_id "XLOC_204041"; transcript_id "TCONS_00971019"; exon_number "1"; gene_type "intronic_lncRNA";
X	Cufflinks	exon	21283888	21284111	+	gene_id "XLOC_204398"; transcript_id "TCONS_00948433"; exon_number "1"; gene_type "lincRNA";
X	Cufflinks	exon	21303724	21303927	+	gene_id "XLOC_204401"; transcript_id "TCONS_00971248"; exon_number "1"; gene_type "intronic_lncRNA";
X	Scripture	exon	21396535	21397033	+	gene_id "XLOC_204433"; transcript_id "TCONS_01101112"; exon_number "1"; gene_type "anti-sense_lncRNA";
X	Scripture	exon	21397121	21397396	+	gene_id "XLOC_204433"; transcript_id "TCONS_01101112"; exon_number "2"; gene_type "anti-sense_lncRNA";
X	Cufflinks	exon	21594201	21594443	+	gene_id "XLOC_204656"; transcript_id "TCONS_01009963"; exon_number "1"; gene_type "lincRNA";
X	Cufflinks	exon	21747042	21747701	+	gene_id "XLOC_204687"; transcript_id "TCONS_00948616"; exon_number "1"; gene_type "lincRNA";
X	Cufflinks	exon	21916791	21917606	+	gene_id "XLOC_204747"; transcript_id "TCONS_00948665"; exon_number "1"; gene_type "lincRNA";
X	Cufflinks	exon	22362491	22363010	+	gene_id "XLOC_204874"; transcript_id "TCONS_00992557"; exon_number "1"; gene_type "lincRNA";
X	Cufflinks	exon	22408789	22408936	+	gene_id "XLOC_204881"; transcript_id "TCONS_00971535"; exon_number "1"; gene_type "lincRNA";
X	Cufflinks	exon	22413264	22413341	+	gene_id "XLOC_204881"; transcript_id "TCONS_00971535"; exon_number "2"; gene_type "lincRNA";
X	Cufflinks	exon	22559441	22559645	+	gene_id "XLOC_204968"; transcript_id "TCONS_00992617"; exon_number "1"; gene_type "lincRNA";
X	Cufflinks	exon	22657348	22657659	+	gene_id "XLOC_205119"; transcript_id "TCONS_00992663"; exon_number "1"; gene_type "lincRNA";
X	Cufflinks	exon	22692941	22692999	+	gene_id "XLOC_205119"; transcript_id "TCONS_00992663"; exon_number "2"; gene_type "lincRNA";
X	Cufflinks	exon	22740542	22740748	+	gene_id "XLOC_205119"; transcript_id "TCONS_00992663"; exon_number "3"; gene_type "lincRNA";
X	Cufflinks	exon	22702734	22702939	+	gene_id "XLOC_205170"; transcript_id "TCONS_00971715"; exon_number "1"; gene_type "lincRNA";
X	Cufflinks	exon	22752145	22752353	+	gene_id "XLOC_205239"; transcript_id "TCONS_01041157"; exon_number "1"; gene_type "lincRNA";
X	Cufflinks	exon	23006805	23007010	+	gene_id "XLOC_205478"; transcript_id "TCONS_00971947"; exon_number "1"; gene_type "lincRNA";
X	Cufflinks	exon	23007669	23007798	+	gene_id "XLOC_205480"; transcript_id "TCONS_00949096"; exon_number "1"; gene_type "anti-sense_lncRNA";
X	Cufflinks	exon	23008921	23009533	+	gene_id "XLOC_205480"; transcript_id "TCONS_00949096"; exon_number "2"; gene_type "anti-sense_lncRNA";
X	Scripture	exon	23206133	23206258	+	gene_id "XLOC_205597"; transcript_id "TCONS_01094784"; exon_number "1"; gene_type "lincRNA";
X	Scripture	exon	23214889	23215025	+	gene_id "XLOC_205597"; transcript_id "TCONS_01094784"; exon_number "2"; gene_type "lincRNA";
X	Scripture	exon	23278002	23278145	+	gene_id "XLOC_205613"; transcript_id "TCONS_01110074"; exon_number "1"; gene_type "lincRNA";
X	Scripture	exon	23441780	23441891	+	gene_id "XLOC_205613"; transcript_id "TCONS_01110074"; exon_number "2"; gene_type "lincRNA";
X	Scripture	exon	23278002	23278137	+	gene_id "XLOC_205613"; transcript_id "TCONS_01010419"; exon_number "1"; gene_type "lincRNA";
X	Scripture	exon	23441773	23441898	+	gene_id "XLOC_205613"; transcript_id "TCONS_01010419"; exon_number "2"; gene_type "lincRNA";
X	Cufflinks	exon	111887	112076	-	gene_id "XLOC_205670"; transcript_id "TCONS_01025969"; exon_number "1"; gene_type "lincRNA";
X	Cufflinks	exon	112144	112896	-	gene_id "XLOC_205670"; transcript_id "TCONS_01025969"; exon_number "2"; gene_type "lincRNA";
X	Cufflinks	exon	84572	84962	-	gene_id "XLOC_205680"; transcript_id "TCONS_00949201"; exon_number "1"; gene_type "lincRNA";
X	Cufflinks	exon	85541	85576	-	gene_id "XLOC_205680"; transcript_id "TCONS_00949201"; exon_number "2"; gene_type "lincRNA";
X	Scripture	exon	496601	497040	-	gene_id "XLOC_205888"; transcript_id "TCONS_01086889"; exon_number "1"; gene_type "anti-sense_lncRNA";
X	Scripture	exon	497172	498826	-	gene_id "XLOC_205888"; transcript_id "TCONS_01086889"; exon_number "2"; gene_type "anti-sense_lncRNA";
X	Scripture	exon	498887	500086	-	gene_id "XLOC_205888"; transcript_id "TCONS_01086889"; exon_number "3"; gene_type "anti-sense_lncRNA";
X	Scripture	exon	763222	763233	-	gene_id "XLOC_205909"; transcript_id "TCONS_01087005"; exon_number "1"; gene_type "intronic_lncRNA";
X	Scripture	exon	763441	763806	-	gene_id "XLOC_205909"; transcript_id "TCONS_01087005"; exon_number "2"; gene_type "intronic_lncRNA";
[truncated: 262 more rows]
