# Supplementary material for: LncRNA mediated regulation of aging pathways in Drosophila melanogaster during dietary restriction
Source: Aging (Albany NY). 2016 Sep 27;8(9):2182–97. doi: 10.18632/aging.101062 (PMC5076457; doi:10.18632/aging.101062)
Supplement: Supplementary file 10 [file aging-08-2182-s010.xls]

## Sheet: lncRNA_mRNA.trans
LncRNA	Target_mRNA	Correlation value
XLOC_212147	FBgn0040754	-0.956511
XLOC_212147	FBgn0053199	-0.967142
XLOC_212147	FBgn0042178	0.956894
XLOC_212147	FBgn0016700	-0.960958
XLOC_212147	FBgn0032856	0.96066
XLOC_212147	FBgn0036337	-0.970015
XLOC_212147	FBgn0038331	-0.960727
XLOC_212147	FBgn0032754	0.956631
XLOC_212147	FBgn0085484	-0.952905
XLOC_212147	FBgn0052459	0.986495
XLOC_212147	FBgn0052024	-0.95246
XLOC_062613	FBgn0035124	0.964874
XLOC_062613	FBgn0052406	0.959444
XLOC_062613	FBgn0085316	0.952485
XLOC_062613	FBgn0036436	0.961742
XLOC_062613	FBgn0037829	0.957175
XLOC_062613	FBgn0030449	0.958319
XLOC_062613	FBgn0036598	0.999922
XLOC_062613	FBgn0033594	0.966788
FBgn0266044	FBgn0003308	0.990506
FBgn0266044	FBgn0260481	-0.973658
FBgn0266044	FBgn0035806	0.963618
FBgn0266044	FBgn0053926	0.976877
FBgn0266044	FBgn0034887	0.960931
FBgn0266044	FBgn0086370	0.969
FBgn0266044	FBgn0259878	0.989096
FBgn0266044	FBgn0033224	0.955327
FBgn0266044	FBgn0031562	0.963319
FBgn0266044	FBgn0034045	0.952286
FBgn0266045	FBgn0262357	-0.952762
FBgn0266045	FBgn0003308	-0.963865
FBgn0266045	FBgn0029932	-0.956929
FBgn0266045	FBgn0035806	-0.970154
FBgn0266045	FBgn0034887	-0.954224
FBgn0266045	FBgn0086370	-0.970147
FBgn0266045	FBgn0259878	-0.95177
FBgn0266045	FBgn0033224	-0.958479
FBgn0266045	FBgn0028526	-0.95706
FBgn0266046	FBgn0038246	0.964012
FBgn0266046	FBgn0032876	-0.964511
FBgn0266046	FBgn0038839	0.954312
FBgn0266046	FBgn0038837	0.980173
FBgn0266046	FBgn0003068	0.952936
FBgn0266046	FBgn0067779	-0.963038
FBgn0266046	FBgn0004045	0.957575
FBgn0266046	FBgn0028292	-0.976975
FBgn0266046	FBgn0011288	0.958818
FBgn0266046	FBgn0019650	0.956078
FBgn0266046	FBgn0023179	0.977868
FBgn0266046	FBgn0028370	0.953151
FBgn0266046	FBgn0038874	0.966904
FBgn0266046	FBgn0036984	0.952415
FBgn0266046	FBgn0050115	0.966708
FBgn0266046	FBgn0031688	0.988029
FBgn0266046	FBgn0029720	0.96379
FBgn0266046	FBgn0035021	-0.966311
FBgn0266046	FBgn0013973	0.980196
FBgn0266046	FBgn0022740	0.951132
FBgn0266046	FBgn0034876	-0.953478
FBgn0266046	FBgn0025373	-0.965549
FBgn0266046	FBgn0011742	-0.966672
FBgn0266046	FBgn0037464	0.952217
FBgn0266046	FBgn0053531	0.963263
FBgn0266046	FBgn0010114	0.959227
FBgn0266046	FBgn0034978	0.969421
FBgn0266046	FBgn0003248	0.953148
FBgn0266046	FBgn0033484	0.962364
FBgn0266046	FBgn0027453	-0.957725
FBgn0266046	FBgn0033033	0.96956
FBgn0266046	FBgn0039064	0.950171
FBgn0266046	FBgn0028481	0.977459
FBgn0266046	FBgn0086348	0.955221
FBgn0266046	FBgn0038638	0.951618
FBgn0266046	FBgn0030738	-0.965631
FBgn0266046	FBgn0042127	-0.952192
FBgn0266046	FBgn0053490	0.964099
FBgn0266046	FBgn0036289	0.981168
FBgn0266046	FBgn0038316	-0.951124
FBgn0266046	FBgn0263511	0.954535
FBgn0266046	FBgn0260658	0.975469
FBgn0266046	FBgn0038165	0.98185
FBgn0266046	FBgn0032058	0.95919
FBgn0266046	FBgn0026403	0.950483
FBgn0266046	FBgn0035092	0.952186
FBgn0266046	FBgn0263930	0.953782
FBgn0266046	FBgn0038052	0.964118
FBgn0266046	FBgn0086604	0.952273
FBgn0266046	FBgn0035501	0.954432
FBgn0266046	FBgn0036319	0.966256
FBgn0266046	FBgn0038202	0.950315
FBgn0266046	FBgn0033783	-0.953875
FBgn0266046	FBgn0034433	-0.967974
FBgn0266046	FBgn0013467	0.966754
FBgn0266046	FBgn0037106	-0.953761
FBgn0266046	FBgn0038432	-0.955002
FBgn0266046	FBgn0038420	0.953697
FBgn0266046	FBgn0265629	0.986832
FBgn0266046	FBgn0043456	-0.972469
FBgn0266049	FBgn0004009	0.95249
FBgn0266049	FBgn0000052	0.967068
FBgn0266049	FBgn0035734	0.983445
FBgn0266049	FBgn0010591	-0.951731
XLOC_209717	FBgn0021800	-0.963223
XLOC_209717	FBgn0031149	-0.951332
XLOC_209717	FBgn0010052	0.966669
XLOC_209717	FBgn0033260	-0.981638
XLOC_209717	FBgn0260468	-0.964229
XLOC_209717	FBgn0003965	0.953799
XLOC_080329	FBgn0036398	0.960682
XLOC_080329	FBgn0035423	-0.953859
XLOC_080329	FBgn0051635	0.973941
XLOC_080329	FBgn0003165	0.961656
XLOC_080329	FBgn0004656	0.957633
XLOC_080329	FBgn0030674	0.972553
XLOC_080329	FBgn0037439	-0.955145
XLOC_080329	FBgn0035555	0.954006
XLOC_080329	FBgn0259170	0.975586
XLOC_080329	FBgn0261444	0.961433
XLOC_080329	FBgn0030266	0.959462
XLOC_080329	FBgn0043884	0.969092
XLOC_080329	FBgn0004606	0.956132
XLOC_080329	FBgn0034658	0.9918
XLOC_080329	FBgn0034300	0.963125
XLOC_080329	FBgn0262103	0.953502
XLOC_080329	FBgn0041191	-0.951224
XLOC_080329	FBgn0038056	-0.969526
XLOC_080329	FBgn0002431	0.963788
XLOC_080329	FBgn0261617	0.962648
XLOC_080329	FBgn0260938	0.960048
XLOC_049172	FBgn0040799	0.967475
XLOC_049172	FBgn0037415	-0.981082
XLOC_049172	FBgn0085209	0.983742
XLOC_027829	FBgn0085214	1
XLOC_027829	FBgn0052594	0.955413
XLOC_027829	FBgn0035124	0.961167
XLOC_027829	FBgn0038240	0.963866
XLOC_027829	FBgn0034647	0.987503
XLOC_027829	FBgn0039257	0.954092
XLOC_027829	FBgn0032535	0.970354
XLOC_027829	FBgn0015519	0.969462
XLOC_027829	FBgn0085328	0.991111
XLOC_027829	FBgn0035168	0.987961
XLOC_027829	FBgn0051776	0.955504
XLOC_027829	FBgn0053764	1
XLOC_027829	FBgn0030859	0.976724
XLOC_027829	FBgn0053159	0.977319
XLOC_027829	FBgn0033110	0.9874
XLOC_027829	FBgn0262144	1
XLOC_027829	FBgn0037916	0.972567
XLOC_027829	FBgn0263655	0.975207
XLOC_027829	FBgn0035468	0.995147
XLOC_027829	FBgn0001229	0.95959
XLOC_027829	FBgn0038486	0.967947
XLOC_027829	FBgn0261531	1
XLOC_027829	FBgn0038309	0.967363
XLOC_027829	FBgn0035023	0.957272
XLOC_027829	FBgn0031142	0.996238
XLOC_027829	FBgn0004635	0.955688
XLOC_027829	FBgn0260646	1
XLOC_027829	FBgn0033153	0.967719
XLOC_027829	FBgn0267042	1
XLOC_027829	FBgn0028899	0.969707
XLOC_027829	FBgn0050293	0.979997
XLOC_027829	FBgn0036311	0.957698
XLOC_027829	FBgn0036503	0.983515
XLOC_027829	FBgn0051354	0.987841
XLOC_027829	FBgn0035049	0.965623
XLOC_027829	FBgn0086708	0.973867
XLOC_027829	FBgn0038852	0.985857
XLOC_027829	FBgn0038851	0.99714
XLOC_027829	FBgn0038067	0.950691
XLOC_027829	FBgn0053136	0.963807
XLOC_027829	FBgn0013278	0.98695
XLOC_027829	FBgn0029856	0.970448
XLOC_027829	FBgn0263597	1
XLOC_027829	FBgn0036181	0.978894
XLOC_027829	FBgn0011722	0.961908
XLOC_027829	FBgn0028487	-0.97063
XLOC_027829	FBgn0042206	0.970319
XLOC_027829	FBgn0037073	-0.965861
XLOC_027829	FBgn0053922	1
XLOC_027829	FBgn0034489	0.970431
XLOC_027829	FBgn0085252	1
XLOC_027829	FBgn0063493	0.950887
XLOC_027829	FBgn0005660	0.988854
XLOC_027829	FBgn0038789	0.970648
XLOC_027829	FBgn0086782	0.983139
XLOC_027829	FBgn0039009	0.978856
XLOC_027829	FBgn0261630	0.976237
XLOC_027829	FBgn0037751	0.952633
XLOC_027829	FBgn0037753	0.976571
XLOC_027829	FBgn0035612	0.964084
XLOC_027829	FBgn0036363	0.957737
XLOC_027829	FBgn0005626	0.965252
XLOC_027829	FBgn0034005	0.988978
XLOC_027829	FBgn0052137	0.964279
XLOC_027829	FBgn0013277	0.993956
XLOC_027829	FBgn0013276	0.966863
XLOC_027829	FBgn0013279	0.95192
XLOC_027829	FBgn0034153	0.954169
XLOC_027829	FBgn0002842	0.964976
XLOC_027829	FBgn0035439	0.986503
XLOC_027829	FBgn0259957	0.957057
XLOC_027829	FBgn0259973	1
XLOC_027829	FBgn0259971	1
XLOC_027829	FBgn0033834	0.998406
XLOC_027829	FBgn0035693	0.962874
XLOC_027829	FBgn0034639	0.956655
XLOC_027829	FBgn0010042	0.960329
XLOC_027829	FBgn0036468	0.968765
XLOC_027829	FBgn0034278	0.958883
XLOC_027829	FBgn0263607	0.966261
XLOC_027829	FBgn0031301	0.998573
XLOC_027829	FBgn0035078	0.975718
XLOC_027829	FBgn0019890	0.960133
XLOC_027829	FBgn0000395	0.973736
XLOC_027829	FBgn0041246	0.980793
XLOC_027829	FBgn0001168	0.966491
XLOC_027829	FBgn0085438	0.966426
XLOC_027829	FBgn0053542	0.986933
XLOC_027829	FBgn0034718	0.962918
XLOC_027829	FBgn0033498	0.968081
XLOC_027829	FBgn0085404	0.950958
XLOC_027829	FBgn0038598	0.975558
XLOC_027829	FBgn0039071	0.959191
XLOC_027829	FBgn0050203	0.958439
XLOC_027829	FBgn0036057	0.965292
XLOC_027829	FBgn0003231	0.95173
XLOC_027829	FBgn0052982	0.958325
XLOC_027829	FBgn0030904	0.987104
XLOC_027829	FBgn0004102	0.964021
XLOC_027829	FBgn0000278	0.965632
XLOC_027829	FBgn0038018	0.972425
XLOC_027829	FBgn0033592	0.990755
XLOC_027829	FBgn0033204	0.965855
XLOC_027829	FBgn0262000	0.977596
XLOC_027829	FBgn0036681	0.973074
XLOC_027829	FBgn0038221	0.975693
XLOC_027829	FBgn0039010	0.958391
XLOC_027829	FBgn0039255	0.966284
XLOC_027829	FBgn0035763	-0.951459
XLOC_027829	FBgn0032139	0.954511
XLOC_027829	FBgn0001230	0.991652
FBgn0265663	FBgn0037350	-0.988731
FBgn0265663	FBgn0031972	-0.964197
FBgn0265663	FBgn0002838	0.961487
FBgn0265663	FBgn0036258	-0.952426
FBgn0265663	FBgn0259705	-0.969734
FBgn0265663	FBgn0015513	0.971765
FBgn0265663	FBgn0038400	-0.951207
FBgn0265663	FBgn0034454	0.959662
FBgn0265663	FBgn0263863	-0.958144
FBgn0265663	FBgn0039890	-0.9567
FBgn0265663	FBgn0031660	-0.955881
FBgn0265663	FBgn0265191	0.963
FBgn0265663	FBgn0038473	-0.954819
FBgn0265663	FBgn0037102	-0.953032
FBgn0265663	FBgn0036643	-0.980324
FBgn0265663	FBgn0031374	0.958301
FBgn0265663	FBgn0037815	-0.982516
FBgn0265663	FBgn0261373	-0.957204
FBgn0265663	FBgn0266411	0.966059
FBgn0265663	FBgn0260965	0.966869
FBgn0265663	FBgn0039697	-0.95088
FBgn0265663	FBgn0032986	-0.967525
FBgn0265663	FBgn0028737	-0.964527
FBgn0265663	FBgn0010741	-0.955825
FBgn0265663	FBgn0039305	-0.957989
FBgn0265663	FBgn0261671	0.98981
FBgn0265663	FBgn0039026	0.951599
FBgn0265663	FBgn0263346	0.977091
FBgn0265663	FBgn0003714	-0.963359
FBgn0265663	FBgn0046296	-0.956565
FBgn0265663	FBgn0036974	-0.958827
FBgn0265663	FBgn0034001	-0.95656
FBgn0265663	FBgn0037942	-0.965799
FBgn0265663	FBgn0030719	-0.956159
FBgn0265663	FBgn0033381	-0.953954
FBgn0265663	FBgn0029718	-0.980004
FBgn0265663	FBgn0029715	-0.966349
FBgn0265663	FBgn0026879	-0.98498
FBgn0265663	FBgn0033162	-0.979416
FBgn0265663	FBgn0033364	0.961253
FBgn0265663	FBgn0003175	0.955754
FBgn0265663	FBgn0030433	-0.968928
FBgn0265663	FBgn0262742	0.978898
FBgn0265663	FBgn0263977	-0.960568
FBgn0265663	FBgn0036557	-0.979489
FBgn0265663	FBgn0264691	-0.961615
FBgn0265663	FBgn0260440	0.962894
FBgn0265663	FBgn0025117	-0.950874
FBgn0265663	FBgn0034081	-0.959116
FBgn0265663	FBgn0026179	0.959512
FBgn0265663	FBgn0261791	-0.954147
FBgn0265663	FBgn0266124	-0.980687
FBgn0265663	FBgn0053977	-0.952634
FBgn0265663	FBgn0260759	-0.972932
FBgn0265663	FBgn0034573	-0.969054
FBgn0265663	FBgn0015834	-0.95653
XLOC_001163	FBgn0039430	0.95505
XLOC_001163	FBgn0038246	0.982742
XLOC_001163	FBgn0263316	0.95196
XLOC_001163	FBgn0035462	-0.9586
XLOC_001163	FBgn0032876	-0.966814
XLOC_001163	FBgn0259736	0.951795
XLOC_001163	FBgn0038837	0.952897
XLOC_001163	FBgn0038269	-0.957419
XLOC_001163	FBgn0067779	-0.962353
XLOC_001163	FBgn0004045	0.952233
XLOC_001163	FBgn0034725	0.950915
XLOC_001163	FBgn0026439	0.966141
XLOC_001163	FBgn0026430	-0.963468
XLOC_001163	FBgn0031424	0.972577
XLOC_001163	FBgn0010770	-0.968346
XLOC_001163	FBgn0025808	-0.963253
XLOC_001163	FBgn0011288	0.957692
XLOC_001163	FBgn0005777	-0.978022
XLOC_001163	FBgn0030272	0.953816
XLOC_001163	FBgn0023179	0.972306
XLOC_001163	FBgn0263025	-0.953674
XLOC_001163	FBgn0036984	0.993822
XLOC_001163	FBgn0014011	0.954769
XLOC_001163	FBgn0033117	-0.952061
XLOC_001163	FBgn0003346	-0.957024
XLOC_001163	FBgn0087012	0.964028
XLOC_001163	FBgn0262867	0.961241
XLOC_001163	FBgn0266579	0.959895
XLOC_001163	FBgn0051619	0.960214
XLOC_001163	FBgn0003162	0.974496
XLOC_001163	FBgn0032924	-0.96416
XLOC_001163	FBgn0086680	0.958349
XLOC_001163	FBgn0028685	-0.955527
XLOC_001163	FBgn0023479	0.956628
XLOC_001163	FBgn0024956	-0.950702
XLOC_001163	FBgn0259111	0.982838
XLOC_001163	FBgn0266450	0.954737
XLOC_001163	FBgn0040283	-0.9502
XLOC_001163	FBgn0037466	-0.968063
XLOC_001163	FBgn0038583	-0.96159
XLOC_001163	FBgn0010114	0.960452
XLOC_001163	FBgn0083940	0.952635
XLOC_001163	FBgn0041147	-0.967594
XLOC_001163	FBgn0034396	0.951988
XLOC_001163	FBgn0033274	0.952851
XLOC_001163	FBgn0032636	0.956345
XLOC_001163	FBgn0037814	-0.957321
XLOC_001163	FBgn0036882	0.952055
XLOC_001163	FBgn0037384	-0.979129
XLOC_001163	FBgn0030078	0.966721
XLOC_001163	FBgn0033033	0.971585
XLOC_001163	FBgn0015664	-0.959594
XLOC_001163	FBgn0040600	0.968452
XLOC_001163	FBgn0011723	0.952554
XLOC_001163	FBgn0031988	-0.95306
XLOC_001163	FBgn0036890	0.959308
XLOC_001163	FBgn0027553	-0.968867
XLOC_001163	FBgn0031948	0.966488
XLOC_001163	FBgn0030970	-0.962784
XLOC_001163	FBgn0011787	-0.958613
XLOC_001163	FBgn0003731	0.95333
XLOC_001163	FBgn0036923	0.960312
XLOC_001163	FBgn0030738	-0.962967
XLOC_001163	FBgn0027515	-0.950671
XLOC_001163	FBgn0035865	0.971834
XLOC_001163	FBgn0028400	0.957035
XLOC_001163	FBgn0037941	0.959533
XLOC_001163	FBgn0027537	-0.970542
XLOC_001163	FBgn0027085	-0.966068
XLOC_001163	FBgn0040273	-0.956134
XLOC_001163	FBgn0264503	0.953287
XLOC_001163	FBgn0267977	-0.9545
XLOC_001163	FBgn0267978	0.970424
XLOC_001163	FBgn0266758	0.976082
XLOC_001163	FBgn0036289	0.977732
XLOC_001163	FBgn0001216	0.963702
XLOC_001163	FBgn0014028	0.966714
XLOC_001163	FBgn0016076	0.958047
XLOC_001163	FBgn0264848	-0.956991
XLOC_001163	FBgn0260658	0.972687
XLOC_001163	FBgn0024698	-0.962654
XLOC_001163	FBgn0265180	0.950153
XLOC_001163	FBgn0015218	-0.966077
XLOC_001163	FBgn0039178	0.96671
XLOC_001163	FBgn0010329	0.961462
XLOC_001163	FBgn0264699	0.968893
XLOC_001163	FBgn0024432	-0.951557
XLOC_001163	FBgn0085432	0.960122
XLOC_001163	FBgn0036480	-0.977162
XLOC_001163	FBgn0035703	-0.958605
XLOC_001163	FBgn0041092	0.952354
XLOC_001163	FBgn0004858	0.959142
XLOC_001163	FBgn0263930	0.951505
XLOC_001163	FBgn0037526	-0.974236
XLOC_001163	FBgn0038052	0.980692
XLOC_001163	FBgn0086604	0.98814
XLOC_001163	FBgn0002789	0.969736
XLOC_001163	FBgn0053978	0.981381
XLOC_001163	FBgn0033249	0.963009
XLOC_001163	FBgn0035977	0.978155
XLOC_001163	FBgn0027057	-0.960597
XLOC_001163	FBgn0027055	-0.95806
XLOC_001163	FBgn0035501	0.951868
XLOC_001163	FBgn0036319	0.967748
XLOC_001163	FBgn0264443	0.966297
XLOC_001163	FBgn0259211	0.963044
XLOC_001163	FBgn0039925	0.950102
XLOC_001163	FBgn0268063	0.973422
XLOC_001163	FBgn0005655	-0.951141
XLOC_001163	FBgn0052082	0.992377
XLOC_001163	FBgn0034433	-0.982115
XLOC_001163	FBgn0032157	-0.952713
XLOC_001163	FBgn0038191	-0.980043
XLOC_001163	FBgn0038420	0.964158
XLOC_001163	FBgn0060296	0.968399
XLOC_001163	FBgn0053653	0.957914
XLOC_001163	FBgn0003701	-0.950404
XLOC_001163	FBgn0043456	-0.957742
XLOC_127353	FBgn0023415	0.962609
XLOC_127353	FBgn0036465	0.962821
XLOC_223628	FBgn0037975	-0.984275
XLOC_223628	FBgn0033558	-0.980731
XLOC_223628	FBgn0034510	0.999853
XLOC_223628	FBgn0037826	-0.978865
FBgn0265665	FBgn0035568	0.953027
FBgn0265665	FBgn0033628	0.969913
FBgn0266821	FBgn0010803	-0.978671
FBgn0266821	FBgn0052351	0.964014
FBgn0266821	FBgn0039189	-0.965959
FBgn0266821	FBgn0261274	-0.979464
FBgn0266821	FBgn0024956	-0.954352
FBgn0266821	FBgn0026361	-0.984016
FBgn0266821	FBgn0053512	0.981424
FBgn0266821	FBgn0038381	-0.971803
FBgn0266821	FBgn0267001	0.950256
FBgn0266821	FBgn0031255	0.956986
FBgn0266821	FBgn0250847	0.960579
FBgn0266821	FBgn0053299	0.987543
FBgn0266821	FBgn0035865	0.957949
FBgn0266821	FBgn0036818	-0.980067
FBgn0266821	FBgn0053348	0.953819
FBgn0266821	FBgn0033368	0.973442
FBgn0266821	FBgn0020270	-0.956915
FBgn0266821	FBgn0027375	-0.95113
FBgn0266821	FBgn0036680	0.951844
XLOC_161533	FBgn0032286	0.999878
XLOC_161533	FBgn0025393	0.959503
XLOC_161533	FBgn0033879	-0.968991
XLOC_161533	FBgn0034417	0.953482
XLOC_161533	FBgn0032457	0.966865
FBgn0267319	FBgn0032804	0.96202
FBgn0267319	FBgn0051698	1
FBgn0267319	FBgn0263084	0.967509
FBgn0267319	FBgn0261997	1
FBgn0267319	FBgn0053810	1
FBgn0267319	FBgn0259961	1
FBgn0267319	FBgn0259968	1
FBgn0267319	FBgn0038527	1
FBgn0267319	FBgn0026320	0.980125
FBgn0267319	FBgn0035257	0.995368
FBgn0267319	FBgn0036056	1
FBgn0267319	FBgn0037992	0.995207
FBgn0267319	FBgn0262812	1
FBgn0267319	FBgn0033275	0.997528
FBgn0267319	FBgn0024294	0.952338
FBgn0267319	FBgn0035621	0.99868
FBgn0267319	FBgn0000071	0.97444
FBgn0267319	FBgn0260011	0.962192
FBgn0267319	FBgn0263842	1
FBgn0267319	FBgn0051002	0.974897
FBgn0267319	FBgn0267449	1
FBgn0267319	FBgn0053669	1
FBgn0267319	FBgn0003313	0.984564
FBgn0267319	FBgn0001254	0.988435
FBgn0267319	FBgn0001256	0.981135
FBgn0267319	FBgn0037178	1
FBgn0267319	FBgn0050413	0.964077
FBgn0267319	FBgn0259959	1
FBgn0267319	FBgn0053772	1
FBgn0267319	FBgn0263512	-0.963587
FBgn0267319	FBgn0035208	0.996338
FBgn0267319	FBgn0265317	1
FBgn0267319	FBgn0051813	0.997698
FBgn0267319	FBgn0051789	0.974492
FBgn0267319	FBgn0026175	0.950429
FBgn0267319	FBgn0001313	1
FBgn0267319	FBgn0036352	0.952357
FBgn0267318	FBgn0267336	0.979284
FBgn0267318	FBgn0261552	0.958205
FBgn0267318	FBgn0033848	0.96063
FBgn0267318	FBgn0265429	0.964758
FBgn0267318	FBgn0039450	-0.968752
FBgn0267318	FBgn0033730	0.950931
FBgn0267318	FBgn0035132	0.986474
FBgn0267318	FBgn0032771	0.969884
FBgn0267318	FBgn0034730	0.95521
FBgn0267318	FBgn0033490	0.981729
FBgn0267318	FBgn0037040	0.976022
FBgn0267318	FBgn0263392	0.953189
FBgn0267313	FBgn0030377	0.970873
FBgn0267313	FBgn0083946	0.97715
FBgn0267313	FBgn0004914	0.956738
FBgn0267313	FBgn0037340	-0.951119
FBgn0267310	FBgn0086768	-0.958266
FBgn0267310	FBgn0036498	0.966085
FBgn0267310	FBgn0041174	-0.968652
FBgn0267310	FBgn0261477	0.96208
FBgn0267315	FBgn0050114	0.963161
FBgn0267315	FBgn0020443	-0.965825
FBgn0267315	FBgn0030990	-0.985358
FBgn0267315	FBgn0028999	0.959685
FBgn0267315	FBgn0053647	0.993719
FBgn0267315	FBgn0002023	0.960592
FBgn0267315	FBgn0265186	0.964691
FBgn0267315	FBgn0037655	-0.964034
FBgn0267315	FBgn0039705	-0.953004
FBgn0267315	FBgn0000028	0.950802
XLOC_005376	FBgn0034838	0.976959
XLOC_005376	FBgn0261287	0.962985
XLOC_002415	FBgn0052311	0.951118
XLOC_002415	FBgn0035878	-0.953277
XLOC_002415	FBgn0259736	0.983885
XLOC_002415	FBgn0264001	0.960679
XLOC_002415	FBgn0261555	0.953398
XLOC_002415	FBgn0028863	0.952123
XLOC_002415	FBgn0035149	-0.955043
XLOC_002415	FBgn0034725	0.954397
XLOC_002415	FBgn0035627	-0.955981
XLOC_002415	FBgn0026430	-0.954206
XLOC_002415	FBgn0020388	-0.966114
XLOC_002415	FBgn0005777	-0.967505
XLOC_002415	FBgn0250788	0.986985
XLOC_002415	FBgn0037931	-0.955628
XLOC_002415	FBgn0034606	0.950926
XLOC_002415	FBgn0040089	0.975872
XLOC_002415	FBgn0036984	0.959949
XLOC_002415	FBgn0031661	-0.955351
XLOC_002415	FBgn0038453	-0.96182
XLOC_002415	FBgn0086711	-0.951829
XLOC_002415	FBgn0003124	-0.959607
XLOC_002415	FBgn0031875	-0.97247
XLOC_002415	FBgn0015925	-0.961195
XLOC_002415	FBgn0004573	0.951797
XLOC_002415	FBgn0034425	-0.976851
XLOC_002415	FBgn0028919	-0.966515
XLOC_002415	FBgn0260642	0.950506
XLOC_002415	FBgn0039494	0.958309
XLOC_002415	FBgn0030170	-0.976596
XLOC_002415	FBgn0265356	0.970303
XLOC_002415	FBgn0051675	0.980001
XLOC_002415	FBgn0032929	-0.958945
XLOC_002415	FBgn0086680	0.970583
XLOC_002415	FBgn0028685	-0.956324
XLOC_002415	FBgn0036391	0.957475
XLOC_002415	FBgn0037622	-0.952903
XLOC_002415	FBgn0037235	-0.956053
XLOC_002415	FBgn0029123	0.950441
XLOC_002415	FBgn0038551	-0.952238
XLOC_002415	FBgn0051108	-0.987574
XLOC_002415	FBgn0040283	-0.984477
XLOC_002415	FBgn0010114	0.950552
XLOC_002415	FBgn0083940	0.968851
XLOC_002415	FBgn0266420	-0.977468
XLOC_002415	FBgn0028996	0.957496
XLOC_002415	FBgn0053556	0.960823
XLOC_002415	FBgn0037432	0.953981
XLOC_002415	FBgn0010173	-0.962048
XLOC_002415	FBgn0041605	0.963274
XLOC_002415	FBgn0002306	0.969729
XLOC_002415	FBgn0030078	0.956068
XLOC_002415	FBgn0038692	-0.959347
XLOC_002415	FBgn0086675	0.955493
XLOC_002415	FBgn0039691	-0.956515
XLOC_002415	FBgn0053147	0.969253
XLOC_002415	FBgn0004177	-0.966124
XLOC_002415	FBgn0036890	0.981421
XLOC_002415	FBgn0027553	-0.958163
XLOC_002415	FBgn0010416	-0.976542
XLOC_002415	FBgn0032859	-0.950199
XLOC_002415	FBgn0261999	0.953859
XLOC_002415	FBgn0030970	-0.971993
XLOC_002415	FBgn0034693	0.960149
XLOC_002415	FBgn0003731	0.961888
XLOC_002415	FBgn0262579	0.965733
XLOC_002415	FBgn0032811	-0.965227
XLOC_002415	FBgn0028400	0.958148
XLOC_002415	FBgn0027539	-0.962433
XLOC_002415	FBgn0027537	-0.960738
XLOC_002415	FBgn0030863	-0.953866
XLOC_002415	FBgn0261015	0.968833
XLOC_002415	FBgn0037205	-0.97187
XLOC_002415	FBgn0016650	0.955743
XLOC_002415	FBgn0052815	0.968552
XLOC_002415	FBgn0019972	-0.957861
XLOC_002415	FBgn0030420	-0.959166
XLOC_002415	FBgn0026630	-0.985384
XLOC_002415	FBgn0036991	-0.960412
XLOC_002415	FBgn0031886	-0.951882
XLOC_002415	FBgn0085425	0.96835
XLOC_002415	FBgn0052438	-0.953585
XLOC_002415	FBgn0260639	-0.952969
XLOC_002415	FBgn0261065	-0.983642
XLOC_002415	FBgn0031869	0.987817
XLOC_002415	FBgn0264848	-0.977071
XLOC_002415	FBgn0082585	0.965704
XLOC_002415	FBgn0250789	0.974372
XLOC_002415	FBgn0052062	0.954307
XLOC_002415	FBgn0004622	0.961519
XLOC_002415	FBgn0024943	0.971313
XLOC_002415	FBgn0039188	-0.950424
XLOC_002415	FBgn0052452	-0.961856
XLOC_002415	FBgn0024432	-0.951057
XLOC_002415	FBgn0039110	-0.956497
XLOC_002415	FBgn0038649	-0.966834
XLOC_002415	FBgn0036827	-0.968782
XLOC_002415	FBgn0032078	-0.956862
XLOC_002415	FBgn0038889	-0.954698
XLOC_002415	FBgn0029113	-0.960995
XLOC_002415	FBgn0030745	0.955062
XLOC_002415	FBgn0041096	0.952547
XLOC_002415	FBgn0041092	0.954243
XLOC_002415	FBgn0014879	-0.950673
XLOC_002415	FBgn0038927	-0.952317
XLOC_002415	FBgn0032014	-0.955621
XLOC_002415	FBgn0000239	-0.956366
XLOC_002415	FBgn0002899	-0.950314
XLOC_002415	FBgn0001974	-0.955147
XLOC_002415	FBgn0267841	-0.986363
XLOC_002415	FBgn0002789	0.973578
XLOC_002415	FBgn0010389	0.955837
XLOC_002415	FBgn0033929	-0.962087
XLOC_002415	FBgn0053978	0.963003
XLOC_002415	FBgn0033249	0.958229
XLOC_002415	FBgn0033028	-0.953105
XLOC_002415	FBgn0032194	-0.962319
XLOC_002415	FBgn0011660	-0.961689
XLOC_002415	FBgn0051716	-0.97122
XLOC_002415	FBgn0264443	0.972357
XLOC_002415	FBgn0001991	0.966906
XLOC_002415	FBgn0040071	0.95074
XLOC_002415	FBgn0033968	0.974251
XLOC_002415	FBgn0035520	-0.96612
XLOC_002415	FBgn0264894	0.951348
XLOC_002415	FBgn0052082	0.959787
XLOC_002415	FBgn0032157	-0.973253
XLOC_002415	FBgn0032156	0.978715
XLOC_002415	FBgn0035816	0.955987
XLOC_002415	FBgn0017457	-0.952594
XLOC_002415	FBgn0053653	0.954952
XLOC_002415	FBgn0016797	0.954731
XLOC_078295	FBgn0036705	0.955676
XLOC_078295	FBgn0030615	0.962404
XLOC_078295	FBgn0036440	-0.959343
XLOC_078295	FBgn0031697	-0.960789
XLOC_194202	FBgn0003261	0.952541
XLOC_194202	FBgn0000022	0.953246
XLOC_194202	FBgn0030202	0.976881
FBgn0266413	FBgn0002905	0.954639
FBgn0266413	FBgn0003312	0.957269
XLOC_061699	FBgn0265785	0.999989
XLOC_061699	FBgn0051876	0.961915
XLOC_061699	FBgn0040262	0.960332
XLOC_061699	FBgn0033687	0.953
XLOC_061699	FBgn0037304	0.956554
XLOC_061699	FBgn0051679	0.973113
XLOC_061699	FBgn0083949	0.958674
XLOC_061699	FBgn0025833	0.95989
XLOC_061699	FBgn0031065	0.966365
XLOC_061699	FBgn0030588	0.955641
XLOC_061699	FBgn0259246	0.955932
XLOC_061699	FBgn0032879	0.965397
XLOC_061699	FBgn0004244	0.968592
XLOC_061699	FBgn0051915	-0.969811
XLOC_061699	FBgn0085399	0.982922
XLOC_061699	FBgn0033347	0.989527
XLOC_061699	FBgn0038123	0.981401
XLOC_061699	FBgn0053203	0.97372
XLOC_061699	FBgn0053710	0.984105
XLOC_061699	FBgn0030905	0.95033
XLOC_061699	FBgn0035315	0.984396
XLOC_061699	FBgn0036138	0.955179
FBgn0267273	FBgn0033355	0.970323
FBgn0267273	FBgn0030829	0.952761
FBgn0267273	FBgn0040553	0.952503
FBgn0267273	FBgn0015032	0.957717
FBgn0262355	FBgn0026754	-0.958644
FBgn0265819	FBgn0035143	0.970036
FBgn0265819	FBgn0032709	0.950259
FBgn0265819	FBgn0025821	0.973593
FBgn0265819	FBgn0086758	0.969411
FBgn0265819	FBgn0020269	0.958969
FBgn0265819	FBgn0040284	-0.958562
FBgn0265819	FBgn0036856	-0.956166
FBgn0265819	FBgn0263846	0.958229
FBgn0265819	FBgn0037589	0.987643
FBgn0265819	FBgn0036893	-0.952026
FBgn0265819	FBgn0003866	0.951739
FBgn0265819	FBgn0051682	0.959453
FBgn0265819	FBgn0035430	0.954676
FBgn0265819	FBgn0037468	-0.957782
FBgn0265819	FBgn0033985	0.984642
FBgn0265819	FBgn0032057	0.97258
FBgn0265819	FBgn0011758	0.967705
FBgn0265819	FBgn0036014	0.989949
FBgn0265819	FBgn0028554	-0.954314
FBgn0265819	FBgn0262009	0.953947
XLOC_099075	FBgn0032554	0.959736
XLOC_099075	FBgn0031621	0.950568
XLOC_099075	FBgn0030586	0.957151
XLOC_099075	FBgn0035868	-0.969959
FBgn0266954	FBgn0264361	0.99971
FBgn0266954	FBgn0262807	0.969904
FBgn0266954	FBgn0052547	0.956341
XLOC_178542	FBgn0020642	0.962368
XLOC_178542	FBgn0085309	1
XLOC_178542	FBgn0263654	1
XLOC_178542	FBgn0004175	1
XLOC_178542	FBgn0047338	1
XLOC_178542	FBgn0262980	1
XLOC_178542	FBgn0053808	1
XLOC_178542	FBgn0038523	1
XLOC_178542	FBgn0050281	0.950036
FBgn0266010	FBgn0033476	0.959996
FBgn0266010	FBgn0002869	0.95312
XLOC_220979	FBgn0016036	-0.955978
FBgn0046756	FBgn0032790	-0.95324
FBgn0046756	FBgn0037422	0.95229
FBgn0263085	FBgn0037115	0.986303
FBgn0263085	FBgn0265455	0.963899
FBgn0263085	FBgn0028560	0.955005
FBgn0263085	FBgn0037059	0.958272
FBgn0263085	FBgn0051294	0.969317
FBgn0263085	FBgn0040905	0.99149
FBgn0263085	FBgn0036712	0.955973
FBgn0263085	FBgn0041624	0.950602
FBgn0263085	FBgn0037603	-0.952832
FBgn0263085	FBgn0038209	0.962542
FBgn0263085	FBgn0051010	0.956606
FBgn0267557	FBgn0039719	0.960114
FBgn0267557	FBgn0032535	0.960851
FBgn0267557	FBgn0030859	0.954734
FBgn0267557	FBgn0024250	0.975771
FBgn0267557	FBgn0052683	0.966667
FBgn0267557	FBgn0041184	0.960474
FBgn0267557	FBgn0036757	0.956966
FBgn0267557	FBgn0036754	-0.96296
FBgn0267557	FBgn0037057	0.973726
FBgn0267557	FBgn0263106	0.954195
FBgn0267557	FBgn0040336	-0.954772
FBgn0267557	FBgn0261090	0.97032
FBgn0267557	FBgn0260238	0.959019
FBgn0267557	FBgn0035195	-0.962477
FBgn0267557	FBgn0038525	0.957738
FBgn0267557	FBgn0035078	0.962274
FBgn0267557	FBgn0031775	0.952094
FBgn0267557	FBgn0250824	0.962537
FBgn0267557	FBgn0039809	0.950449
FBgn0267557	FBgn0003250	0.954476
FBgn0267557	FBgn0031037	0.953256
FBgn0267557	FBgn0039255	0.952895
FBgn0267557	FBgn0032682	0.968069
XLOC_008645	FBgn0035887	0.954562
XLOC_008645	FBgn0023091	0.950744
XLOC_008645	FBgn0035572	0.968856
XLOC_008645	FBgn0262362	0.953049
XLOC_048832	FBgn0265256	0.972455
XLOC_048832	FBgn0053271	0.988472
XLOC_048832	FBgn0036427	-0.97776
XLOC_048832	FBgn0262814	0.988412
XLOC_048832	FBgn0020765	0.96911
XLOC_013901	FBgn0053627	0.963771
XLOC_013901	FBgn0038450	-0.952409
XLOC_013901	FBgn0261567	0.963086
XLOC_013901	FBgn0259949	0.96289
XLOC_013901	FBgn0053798	0.96375
XLOC_198572	FBgn0030814	0.973132
XLOC_198572	FBgn0036438	0.958807
XLOC_198572	FBgn0051551	0.96772
XLOC_198572	FBgn0035674	-0.956215
XLOC_198572	FBgn0267728	0.953375
XLOC_198572	FBgn0052228	0.965008
XLOC_198572	FBgn0040816	0.955035
XLOC_198572	FBgn0265199	0.999668
XLOC_198572	FBgn0039577	0.974893
XLOC_198572	FBgn0030004	-0.984927
XLOC_198572	FBgn0265257	0.96485
XLOC_186240	FBgn0036607	0.9734
XLOC_186240	FBgn0259193	0.952795
XLOC_186240	FBgn0052425	0.962097
XLOC_138829	FBgn0034407	0.95474
XLOC_138829	FBgn0001255	0.955281
FBgn0266690	FBgn0032401	0.955944
FBgn0266690	FBgn0038627	0.965976
FBgn0266697	FBgn0035625	0.964497
FBgn0266697	FBgn0035068	0.964799
FBgn0266697	FBgn0032639	0.97593
FBgn0266697	FBgn0052268	0.972013
FBgn0266697	FBgn0039613	0.95634
FBgn0266697	FBgn0033851	0.956358
FBgn0266697	FBgn0003377	0.96158
FBgn0266697	FBgn0034906	0.971071
FBgn0267021	FBgn0037101	0.953757
FBgn0266247	FBgn0020642	0.962368
FBgn0266247	FBgn0085309	1
FBgn0266247	FBgn0263654	1
FBgn0266247	FBgn0004175	1
FBgn0266247	FBgn0047338	1
FBgn0266247	FBgn0262980	1
FBgn0266247	FBgn0053808	1
FBgn0266247	FBgn0038523	1
FBgn0266247	FBgn0050281	0.950036
XLOC_151037	FBgn0031467	0.978188
XLOC_151037	FBgn0036121	-0.950505
FBgn0267023	FBgn0051668	0.95719
XLOC_096535	FBgn0050324	0.958408
FBgn0264841	FBgn0032475	0.952558
FBgn0264841	FBgn0086899	0.9836
FBgn0264841	FBgn0051739	0.967708
FBgn0264841	FBgn0050344	-0.954521
FBgn0264841	FBgn0027506	0.951629
FBgn0264841	FBgn0027508	0.959264
FBgn0264841	FBgn0026597	0.963993
FBgn0264841	FBgn0016984	0.96129
FBgn0264841	FBgn0023097	0.955963
FBgn0264841	FBgn0025641	0.970442
FBgn0264841	FBgn0030274	0.955355
FBgn0264841	FBgn0039451	0.99059
FBgn0264841	FBgn0025626	0.954143
FBgn0264841	FBgn0263005	0.960951
FBgn0264841	FBgn0263391	0.965974
FBgn0264841	FBgn0045063	0.954783
FBgn0264841	FBgn0004903	0.958086
FBgn0264841	FBgn0033155	0.965591
FBgn0264841	FBgn0259824	0.950663
FBgn0264841	FBgn0261931	0.969058
FBgn0264841	FBgn0259139	0.968068
FBgn0264841	FBgn0039730	0.961803
FBgn0264841	FBgn0014133	0.952155
FBgn0264841	FBgn0053139	0.964766
FBgn0264841	FBgn0004795	0.953165
FBgn0264841	FBgn0033916	0.956152
FBgn0264841	FBgn0046704	0.957089
FBgn0264841	FBgn0005642	0.959789
FBgn0264841	FBgn0262519	0.955457
FBgn0264841	FBgn0044323	0.9708
FBgn0264841	FBgn0035437	0.973391
FBgn0264841	FBgn0027492	0.973978
FBgn0264841	FBgn0039240	0.957014
FBgn0264841	FBgn0037757	0.950264
FBgn0264841	FBgn0036574	0.952721
FBgn0264841	FBgn0000352	0.951997
FBgn0264841	FBgn0030243	0.978318
FBgn0264841	FBgn0050085	0.951391
FBgn0264841	FBgn0028341	0.954782
FBgn0264841	FBgn0262893	-0.981283
FBgn0264841	FBgn0035388	0.955215
FBgn0264841	FBgn0015295	0.975868
FBgn0264841	FBgn0261985	0.955899
FBgn0264841	FBgn0027866	0.957731
FBgn0264841	FBgn0040268	0.986886
FBgn0264841	FBgn0261244	0.965863
FBgn0264841	FBgn0031868	0.983232
FBgn0264841	FBgn0035016	0.951763
FBgn0264841	FBgn0020279	0.950487
FBgn0264841	FBgn0037327	0.964204
FBgn0264841	FBgn0010328	0.954223
FBgn0264841	FBgn0053200	-0.958028
FBgn0264841	FBgn0004406	0.973348
FBgn0264841	FBgn0035267	0.970431
FBgn0264841	FBgn0267790	0.963811
FBgn0264841	FBgn0001104	0.977409
FBgn0264841	FBgn0034060	0.959997
FBgn0264841	FBgn0034598	0.971434
FBgn0264841	FBgn0036624	0.963756
FBgn0264841	FBgn0032295	0.975898
FBgn0264841	FBgn0034498	0.959211
FBgn0264841	FBgn0032378	0.975096
FBgn0264841	FBgn0002413	0.976307
FBgn0264841	FBgn0029861	0.950167
FBgn0264841	FBgn0010280	0.961207
FBgn0264841	FBgn0003218	0.961732
FBgn0264841	FBgn0003028	0.954942
FBgn0264841	FBgn0015360	0.95185
FBgn0264841	FBgn0030966	0.956258
XLOC_087912	FBgn0261800	0.952037
XLOC_087912	FBgn0036550	0.990501
XLOC_087912	FBgn0040780	0.95358
XLOC_173672	FBgn0034136	0.969201
XLOC_173672	FBgn0032125	0.955935
XLOC_173672	FBgn0037387	-0.960149
FBgn0265633	FBgn0027584	0.975855
FBgn0265633	FBgn0034289	0.96501
FBgn0265633	FBgn0033720	0.979433
FBgn0262722	FBgn0037180	1
FBgn0262722	FBgn0050461	1
FBgn0262722	FBgn0039232	0.991816
FBgn0262722	FBgn0260643	1
FBgn0262722	FBgn0036785	-0.950968
FBgn0262722	FBgn0053236	1
FBgn0262722	FBgn0052208	1
FBgn0262722	FBgn0034407	0.966751
FBgn0262722	FBgn0054030	1
FBgn0262722	FBgn0085465	1
FBgn0262722	FBgn0264881	1
FBgn0262722	FBgn0260869	1
FBgn0262722	FBgn0053869	1
FBgn0262722	FBgn0053262	1
FBgn0262722	FBgn0040694	1
FBgn0262722	FBgn0039576	1
FBgn0267552	FBgn0038291	-0.977008
FBgn0267552	FBgn0259952	-0.994998
FBgn0267552	FBgn0034345	0.95345
FBgn0267552	FBgn0024187	-0.965947
FBgn0267552	FBgn0031050	0.955065
FBgn0266245	FBgn0052600	0.953624
FBgn0266245	FBgn0037059	0.979918
FBgn0266245	FBgn0031531	0.951771
FBgn0266245	FBgn0040905	0.966635
XLOC_191121	FBgn0037180	1
XLOC_191121	FBgn0050461	1
XLOC_191121	FBgn0039232	0.991816
XLOC_191121	FBgn0260643	1
XLOC_191121	FBgn0036785	-0.950968
XLOC_191121	FBgn0053236	1
XLOC_191121	FBgn0052208	1
XLOC_191121	FBgn0034407	0.966751
XLOC_191121	FBgn0054030	1
XLOC_191121	FBgn0085465	1
XLOC_191121	FBgn0264881	1
XLOC_191121	FBgn0260869	1
XLOC_191121	FBgn0053869	1
XLOC_191121	FBgn0053262	1
XLOC_191121	FBgn0040694	1
XLOC_191121	FBgn0039576	1
XLOC_077741	FBgn0032804	0.957173
XLOC_077741	FBgn0033275	0.954638
XLOC_077741	FBgn0024294	0.978997
XLOC_077741	FBgn0036205	0.955771
XLOC_077741	FBgn0051002	0.978669
XLOC_077741	FBgn0034460	0.969518
XLOC_077741	FBgn0003313	0.954375
XLOC_077741	FBgn0001254	0.963429
XLOC_077741	FBgn0001256	0.971892
XLOC_077741	FBgn0050413	0.976046
XLOC_077741	FBgn0035208	0.956057
XLOC_077741	FBgn0036089	0.984072
XLOC_077741	FBgn0032582	0.982074
XLOC_077741	FBgn0039728	0.95157
XLOC_077741	FBgn0038643	0.987336
XLOC_077741	FBgn0004591	0.987337
XLOC_077741	FBgn0030928	0.967235
FBgn0267475	FBgn0052068	-0.955089
FBgn0267475	FBgn0016700	-0.954438
FBgn0267475	FBgn0259711	-0.958068
FBgn0267475	FBgn0040688	0.954497
FBgn0265636	FBgn0029959	-0.970951
FBgn0265252	FBgn0033732	0.97173
FBgn0265252	FBgn0028480	0.968039
FBgn0265252	FBgn0030951	0.950699
FBgn0265252	FBgn0040817	0.973155
FBgn0265252	FBgn0050398	0.976011
FBgn0265252	FBgn0003257	-0.974431
FBgn0265252	FBgn0261085	0.951356
FBgn0265252	FBgn0050468	0.954728
FBgn0265635	FBgn0037978	-0.966485
FBgn0265635	FBgn0029969	-0.958366
FBgn0265635	FBgn0025629	-0.974913
FBgn0265635	FBgn0029722	0.951453
FBgn0265635	FBgn0085377	-0.958362
FBgn0265635	FBgn0027360	-0.961894
FBgn0265635	FBgn0037297	-0.961364
FBgn0265635	FBgn0036838	-0.955892
FBgn0265635	FBgn0003676	-0.960915
FBgn0265635	FBgn0036853	-0.950595
FBgn0265635	FBgn0039867	-0.957038
FBgn0265635	FBgn0034401	-0.952019
FBgn0265635	FBgn0024833	-0.968448
FBgn0265635	FBgn0086355	-0.950841
FBgn0265635	FBgn0039403	-0.963248
FBgn0265635	FBgn0038806	-0.952756
FBgn0265635	FBgn0023517	-0.969512
FBgn0265635	FBgn0030801	-0.953781
FBgn0265635	FBgn0027334	-0.952913
FBgn0265635	FBgn0032848	-0.951224
FBgn0265635	FBgn0034535	-0.960987
FBgn0265635	FBgn0030349	0.977391
FBgn0265635	FBgn0031281	-0.969833
FBgn0265635	FBgn0029800	-0.954914
FBgn0265635	FBgn0022943	-0.957069
FBgn0265635	FBgn0034380	-0.959023
FBgn0265635	FBgn0039877	-0.957098
FBgn0265635	FBgn0004832	-0.978553
FBgn0265635	FBgn0033690	-0.967919
FBgn0265635	FBgn0035760	-0.962099
FBgn0266242	FBgn0262483	0.954343
FBgn0266242	FBgn0035256	0.951221
FBgn0266242	FBgn0052237	0.95077
FBgn0266242	FBgn0030440	0.965015
FBgn0266242	FBgn0031181	0.971535
FBgn0266242	FBgn0033950	1
FBgn0266242	FBgn0000564	1
FBgn0266242	FBgn0034173	0.963919
FBgn0266242	FBgn0029716	0.976437
FBgn0266242	FBgn0259975	1
FBgn0266242	FBgn0052413	0.956475
FBgn0266242	FBgn0261523	1
FBgn0266242	FBgn0030494	0.959514
FBgn0266242	FBgn0038888	1
FBgn0266242	FBgn0052214	0.999824
FBgn0266242	FBgn0041624	0.966898
FBgn0266242	FBgn0259189	0.976569
FBgn0266242	FBgn0030624	0.96904
XLOC_005199	FBgn0004173	0.988065
XLOC_005199	FBgn0039648	-0.95202
XLOC_005199	FBgn0011273	0.979561
XLOC_005199	FBgn0033516	0.953053
XLOC_052472	FBgn0035423	-0.959552
XLOC_052472	FBgn0051635	0.956132
XLOC_052472	FBgn0037439	-0.957067
XLOC_052472	FBgn0259170	0.950513
XLOC_052472	FBgn0039304	-0.958348
XLOC_052472	FBgn0030266	0.959126
XLOC_052472	FBgn0034658	0.968132
XLOC_052472	FBgn0041191	-0.964235
FBgn0275433	FBgn0264342	0.984827
XLOC_046344	FBgn0015035	0.954786
XLOC_046344	FBgn0083992	0.966609
XLOC_046344	FBgn0053654	0.999997
XLOC_023585	FBgn0040487	0.953358
XLOC_023585	FBgn0261502	0.963223
XLOC_023585	FBgn0032090	0.965374
XLOC_023585	FBgn0031546	0.953884
XLOC_050502	FBgn0002440	-0.963942
XLOC_050502	FBgn0259170	-0.950748
XLOC_050502	FBgn0039304	0.960363
XLOC_050502	FBgn0034658	-0.956884
FBgn0265645	FBgn0011239	0.995002
FBgn0265645	FBgn0038261	0.954432
FBgn0265645	FBgn0038749	0.956671
FBgn0265645	FBgn0030485	0.970095
FBgn0265645	FBgn0025373	-0.965235
FBgn0265645	FBgn0053995	0.968885
FBgn0265645	FBgn0086348	0.968887
FBgn0265645	FBgn0036939	0.95747
FBgn0265645	FBgn0034446	0.951245
FBgn0265645	FBgn0033302	0.954857
FBgn0267451	FBgn0004173	0.999994
FBgn0267451	FBgn0039648	-0.958172
FBgn0267451	FBgn0011273	0.963684
XLOC_085839	FBgn0027567	-0.958126
XLOC_085839	FBgn0086899	-0.97412
XLOC_085839	FBgn0051739	-0.961014
XLOC_085839	FBgn0050344	0.957349
XLOC_085839	FBgn0027503	-0.968926
XLOC_085839	FBgn0038262	0.961993
XLOC_085839	FBgn0005632	-0.966905
XLOC_085839	FBgn0026597	-0.961634
XLOC_085839	FBgn0016984	-0.966772
XLOC_085839	FBgn0021796	-0.981769
XLOC_085839	FBgn0030701	-0.955925
XLOC_085839	FBgn0039451	-0.966096
XLOC_085839	FBgn0031872	-0.962064
XLOC_085839	FBgn0261811	-0.974943
XLOC_085839	FBgn0262714	-0.964969
XLOC_085839	FBgn0031464	-0.950753
XLOC_085839	FBgn0030330	-0.966183
XLOC_085839	FBgn0011826	-0.989232
XLOC_085839	FBgn0259824	-0.960414
XLOC_085839	FBgn0035253	-0.958121
XLOC_085839	FBgn0261931	-0.950132
XLOC_085839	FBgn0259139	-0.959967
XLOC_085839	FBgn0014133	-0.963896
XLOC_085839	FBgn0261954	-0.954879
XLOC_085839	FBgn0004368	-0.952989
XLOC_085839	FBgn0263102	-0.977838
XLOC_085839	FBgn0030055	-0.958224
XLOC_085839	FBgn0033916	-0.959233
XLOC_085839	FBgn0010660	-0.955874
XLOC_085839	FBgn0035437	-0.950575
XLOC_085839	FBgn0033638	-0.965688
XLOC_085839	FBgn0000547	-0.965574
XLOC_085839	FBgn0266053	-0.951776
XLOC_085839	FBgn0000352	-0.974146
XLOC_085839	FBgn0037949	-0.973387
XLOC_085839	FBgn0262893	0.950132
XLOC_085839	FBgn0261988	-0.953312
XLOC_085839	FBgn0023143	-0.984743
XLOC_085839	FBgn0040268	-0.975068
XLOC_085839	FBgn0051992	-0.970265
XLOC_085839	FBgn0030321	-0.9652
XLOC_085839	FBgn0261383	-0.956715
XLOC_085839	FBgn0035016	-0.970569
XLOC_085839	FBgn0020279	-0.965191
XLOC_085839	FBgn0025571	-0.97205
XLOC_085839	FBgn0004391	-0.953757
XLOC_085839	FBgn0020412	-0.972698
XLOC_085839	FBgn0020887	-0.97899
XLOC_085839	FBgn0010328	-0.965274
XLOC_085839	FBgn0035267	-0.97633
XLOC_085839	FBgn0050183	-0.96299
XLOC_085839	FBgn0028538	-0.962158
XLOC_085839	FBgn0034598	-0.956724
XLOC_085839	FBgn0036624	-0.958865
XLOC_085839	FBgn0032295	-0.956156
XLOC_085839	FBgn0034498	-0.950207
XLOC_085839	FBgn0032378	-0.951639
XLOC_085839	FBgn0002413	-0.978661
XLOC_085839	FBgn0037252	-0.965269
XLOC_085839	FBgn0010280	-0.972074
XLOC_085839	FBgn0260936	-0.965118
XLOC_085839	FBgn0036273	-0.962966
XLOC_085839	FBgn0015360	-0.953748
XLOC_078451	FBgn0034180	-0.953564
XLOC_078451	FBgn0260480	-0.952555
XLOC_078451	FBgn0021738	0.983288
XLOC_078451	FBgn0086691	0.960018
XLOC_078451	FBgn0030660	0.954618
XLOC_078451	FBgn0051091	0.958856
XLOC_198996	FBgn0053257	0.992381
XLOC_198996	FBgn0035594	0.954456
XLOC_198996	FBgn0003270	0.952138
XLOC_198996	FBgn0086610	0.986015
XLOC_198996	FBgn0036414	0.959741
XLOC_095055	FBgn0039419	0.96001
XLOC_095055	FBgn0265002	0.975162
XLOC_095055	FBgn0260962	-0.95941
XLOC_095055	FBgn0038725	0.967428
XLOC_095055	FBgn0035449	-0.95483
XLOC_095055	FBgn0033474	-0.986539
XLOC_095055	FBgn0010774	-0.955492
XLOC_095055	FBgn0261680	-0.950018
XLOC_095055	FBgn0025394	-0.95756
XLOC_095055	FBgn0034602	0.966983
XLOC_095055	FBgn0010015	0.974177
XLOC_095055	FBgn0085222	0.952419
XLOC_095055	FBgn0038130	0.950338
XLOC_095055	FBgn0050325	0.964231
XLOC_095055	FBgn0261258	0.95436
XLOC_095055	FBgn0035231	0.962163
XLOC_095055	FBgn0028919	-0.950268
XLOC_095055	FBgn0022740	0.968101
XLOC_095055	FBgn0034876	-0.964987
XLOC_095055	FBgn0002567	-0.959868
XLOC_095055	FBgn0266570	-0.968078
XLOC_095055	FBgn0024689	-0.967003
XLOC_095055	FBgn0033998	-0.954759
XLOC_095055	FBgn0035921	0.956892
XLOC_095055	FBgn0031257	0.959519
XLOC_095055	FBgn0036754	-0.960169
XLOC_095055	FBgn0031042	0.953447
XLOC_095055	FBgn0030528	-0.951874
XLOC_095055	FBgn0052260	0.958231
XLOC_095055	FBgn0031493	-0.967477
XLOC_095055	FBgn0015541	0.959047
XLOC_095055	FBgn0259243	-0.976949
XLOC_095055	FBgn0050357	0.970201
XLOC_095055	FBgn0034723	0.964908
XLOC_095055	FBgn0085420	0.958067
XLOC_095055	FBgn0053986	0.954271
XLOC_095055	FBgn0039916	0.961928
XLOC_095055	FBgn0035636	0.977346
XLOC_095055	FBgn0023534	0.956649
XLOC_095055	FBgn0003339	0.950566
XLOC_095055	FBgn0016650	0.95657
XLOC_095055	FBgn0032514	-0.957207
XLOC_095055	FBgn0037182	-0.963062
XLOC_095055	FBgn0040075	-0.965365
XLOC_095055	FBgn0052698	0.976375
XLOC_095055	FBgn0016076	0.966877
XLOC_095055	FBgn0035205	-0.961774
XLOC_095055	FBgn0038525	0.977718
XLOC_095055	FBgn0011581	0.980446
XLOC_095055	FBgn0039564	0.970968
XLOC_095055	FBgn0020257	0.953991
XLOC_095055	FBgn0033121	-0.984462
XLOC_095055	FBgn0038981	0.95553
XLOC_095055	FBgn0052452	-0.951642
XLOC_095055	FBgn0010329	0.95277
XLOC_095055	FBgn0026403	0.95828
XLOC_095055	FBgn0034718	0.950388
XLOC_095055	FBgn0263131	0.954244
XLOC_095055	FBgn0035092	0.978744
XLOC_095055	FBgn0037447	0.976531
XLOC_095055	FBgn0259163	0.963026
XLOC_095055	FBgn0030041	0.973992
XLOC_095055	FBgn0266580	-0.95427
XLOC_095055	FBgn0025525	0.956275
XLOC_095055	FBgn0027930	0.963574
XLOC_095055	FBgn0050015	0.980082
XLOC_095055	FBgn0035520	-0.974606
XLOC_095055	FBgn0005659	0.952738
XLOC_095055	FBgn0030943	-0.964576
XLOC_095055	FBgn0000715	0.955841
XLOC_095055	FBgn0038420	0.96803
XLOC_137582	FBgn0040759	0.959388
XLOC_137582	FBgn0035870	0.953054
XLOC_137582	FBgn0053468	0.989619
XLOC_137582	FBgn0037516	0.959688
XLOC_137582	FBgn0034647	0.958823
XLOC_137582	FBgn0051776	0.954553
XLOC_137582	FBgn0033110	0.95319
XLOC_137582	FBgn0034335	0.978278
XLOC_137582	FBgn0010038	0.952802
XLOC_137582	FBgn0035468	0.950812
XLOC_137582	FBgn0038486	0.950557
XLOC_137582	FBgn0031142	0.964027
XLOC_137582	FBgn0038595	0.951689
XLOC_137582	FBgn0030310	0.976799
XLOC_137582	FBgn0034789	0.961011
XLOC_137582	FBgn0038412	0.989734
XLOC_137582	FBgn0032923	-0.969006
XLOC_137582	FBgn0250871	0.962795
XLOC_137582	FBgn0250869	0.958418
XLOC_137582	FBgn0028899	0.97827
XLOC_137582	FBgn0039759	0.97233
XLOC_137582	FBgn0033194	0.953518
XLOC_137582	FBgn0038852	0.961051
XLOC_137582	FBgn0038851	0.959316
XLOC_137582	FBgn0038067	0.961419
XLOC_137582	FBgn0262794	0.98222
XLOC_137582	FBgn0263111	0.980598
XLOC_137582	FBgn0010397	0.966616
XLOC_137582	FBgn0013278	0.961842
XLOC_137582	FBgn0038020	0.9641
XLOC_137582	FBgn0031060	-0.950625
XLOC_137582	FBgn0036181	0.963938
XLOC_137582	FBgn0035575	0.955374
XLOC_137582	FBgn0042206	0.990701
XLOC_137582	FBgn0063497	0.969218
XLOC_137582	FBgn0052533	-0.952203
XLOC_137582	FBgn0033770	0.955626
XLOC_137582	FBgn0063493	0.979451
XLOC_137582	FBgn0026063	0.956945
XLOC_137582	FBgn0005660	0.970493
XLOC_137582	FBgn0038789	0.953929
XLOC_137582	FBgn0261630	0.966758
XLOC_137582	FBgn0037751	0.959675
XLOC_137582	FBgn0035612	0.960152
XLOC_137582	FBgn0036363	0.968119
XLOC_137582	FBgn0005626	0.983567
XLOC_137582	FBgn0262982	0.961282
XLOC_137582	FBgn0036959	-0.990097
XLOC_137582	FBgn0265266	0.955712
XLOC_137582	FBgn0052137	0.96234
XLOC_137582	FBgn0033447	0.954728
XLOC_137582	FBgn0013277	0.965357
XLOC_137582	FBgn0034480	0.973251
XLOC_137582	FBgn0035439	0.964868
XLOC_137582	FBgn0259957	0.950629
XLOC_137582	FBgn0033812	-0.950117
XLOC_137582	FBgn0035693	0.956501
XLOC_137582	FBgn0010041	0.966922
XLOC_137582	FBgn0019890	0.953972
XLOC_137582	FBgn0000395	0.961018
XLOC_137582	FBgn0032649	0.953832
XLOC_137582	FBgn0038647	0.953927
XLOC_137582	FBgn0085438	0.973993
XLOC_137582	FBgn0053542	0.981429
XLOC_137582	FBgn0050203	0.956379
XLOC_137582	FBgn0003231	0.97051
XLOC_137582	FBgn0030904	0.975978
XLOC_137582	FBgn0050074	0.95792
XLOC_137582	FBgn0262636	0.955411
XLOC_137582	FBgn0086347	0.980773
XLOC_137582	FBgn0000278	0.970098
XLOC_137582	FBgn0038018	0.970586
XLOC_137582	FBgn0030927	0.959664
XLOC_137582	FBgn0033204	0.96721
XLOC_137582	FBgn0262000	0.964629
XLOC_137582	FBgn0243512	0.952866
XLOC_137582	FBgn0032139	0.956104
XLOC_137582	FBgn0001230	0.953852
XLOC_140178	FBgn0037180	1
XLOC_140178	FBgn0050461	1
XLOC_140178	FBgn0039232	0.991816
XLOC_140178	FBgn0260643	1
XLOC_140178	FBgn0036785	-0.950968
XLOC_140178	FBgn0053236	1
XLOC_140178	FBgn0052208	1
XLOC_140178	FBgn0034407	0.966751
XLOC_140178	FBgn0054030	1
XLOC_140178	FBgn0085465	1
XLOC_140178	FBgn0264881	1
XLOC_140178	FBgn0260869	1
XLOC_140178	FBgn0053869	1
XLOC_140178	FBgn0053262	1
XLOC_140178	FBgn0040694	1
XLOC_140178	FBgn0039576	1
FBgn0267453	FBgn0053092	0.968656
XLOC_031382	FBgn0041622	0.962598
XLOC_031382	FBgn0040393	0.952747
XLOC_031382	FBgn0052024	-0.970425
XLOC_031382	FBgn0026090	-0.977302
XLOC_188898	FBgn0026392	-0.956483
FBgn0267442	FBgn0036764	-0.952377
FBgn0267442	FBgn0040684	-0.955609
FBgn0266361	FBgn0030622	-0.97629
FBgn0266840	FBgn0031946	-0.96971
XLOC_019196	FBgn0036584	-0.959391
XLOC_019196	FBgn0259963	1
XLOC_019196	FBgn0031296	0.982502
XLOC_019196	FBgn0032638	0.993022
XLOC_019196	FBgn0036871	1
XLOC_019196	FBgn0263248	1
XLOC_019196	FBgn0040764	1
XLOC_019196	FBgn0052283	0.953339
XLOC_019196	FBgn0052284	0.959225
XLOC_019196	FBgn0261581	1
XLOC_019196	FBgn0053499	1
XLOC_019196	FBgn0262021	1
FBgn0263767	FBgn0040354	0.957841
FBgn0263767	FBgn0260967	-0.969002
FBgn0263767	FBgn0036870	0.956945
FBgn0263767	FBgn0250816	-0.976696
FBgn0263764	FBgn0037412	0.964097
FBgn0263764	FBgn0052054	-0.958251
FBgn0263764	FBgn0010452	0.964168
FBgn0263764	FBgn0261260	0.9577
FBgn0263768	FBgn0036290	0.960114
FBgn0263768	FBgn0040064	0.961886
FBgn0263768	FBgn0031856	-0.963021
FBgn0263768	FBgn0031169	-0.951241
FBgn0263768	FBgn0027066	0.972389
FBgn0263768	FBgn0038798	-0.953921
FBgn0263768	FBgn0052267	0.968179
FBgn0263768	FBgn0034075	-0.962399
FBgn0263768	FBgn0036310	-0.956231
FBgn0263768	FBgn0046706	0.958112
FBgn0263768	FBgn0265512	0.979463
FBgn0263768	FBgn0035481	-0.956957
FBgn0263768	FBgn0029661	-0.953053
FBgn0263769	FBgn0020642	0.962368
FBgn0263769	FBgn0085309	1
FBgn0263769	FBgn0263654	1
FBgn0263769	FBgn0004175	1
FBgn0263769	FBgn0047338	1
FBgn0263769	FBgn0262980	1
FBgn0263769	FBgn0053808	1
FBgn0263769	FBgn0038523	1
FBgn0263769	FBgn0050281	0.950036
FBgn0267242	FBgn0037765	0.969597
FBgn0267242	FBgn0052379	0.952351
FBgn0267242	FBgn0261800	0.95879
FBgn0267242	FBgn0031700	0.959749
FBgn0267242	FBgn0002526	0.969764
FBgn0267242	FBgn0014179	0.972003
FBgn0267242	FBgn0035711	0.965954
FBgn0267242	FBgn0261611	0.96274
FBgn0267242	FBgn0058298	0.965818
FBgn0267242	FBgn0034267	0.953331
FBgn0267242	FBgn0036428	0.967879
FBgn0267242	FBgn0034463	0.967733
FBgn0267242	FBgn0034553	0.954293
FBgn0267242	FBgn0014469	-0.980589
FBgn0267242	FBgn0033065	-0.95147
FBgn0267242	FBgn0027291	0.954719
FBgn0267242	FBgn0265726	0.957898
FBgn0267242	FBgn0030629	0.962722
FBgn0267242	FBgn0038820	0.973197
FBgn0267242	FBgn0259219	0.977556
FBgn0267242	FBgn0000045	0.964932
FBgn0267242	FBgn0016120	0.97508
FBgn0267242	FBgn0035817	0.951443
FBgn0267242	FBgn0051897	-0.961013
FBgn0267242	FBgn0039591	0.957189
XLOC_108244	FBgn0051419	0.969445
XLOC_108244	FBgn0052199	0.958215
XLOC_149966	FBgn0040653	-0.955057
FBgn0266365	FBgn0263391	-0.962705
FBgn0266365	FBgn0261931	-0.961131
FBgn0266365	FBgn0021776	0.95537
FBgn0266365	FBgn0030915	-0.954064
FBgn0266365	FBgn0030243	-0.951043
FBgn0266365	FBgn0025635	-0.963598
FBgn0266365	FBgn0035267	-0.961743
FBgn0266365	FBgn0032378	-0.96351
XLOC_200175	FBgn0085214	1
XLOC_200175	FBgn0052594	0.955413
XLOC_200175	FBgn0035124	0.961167
XLOC_200175	FBgn0038240	0.963866
XLOC_200175	FBgn0034647	0.987503
XLOC_200175	FBgn0039257	0.954092
XLOC_200175	FBgn0032535	0.970354
XLOC_200175	FBgn0015519	0.969462
XLOC_200175	FBgn0085328	0.991111
XLOC_200175	FBgn0035168	0.987961
XLOC_200175	FBgn0051776	0.955504
XLOC_200175	FBgn0053764	1
XLOC_200175	FBgn0030859	0.976724
XLOC_200175	FBgn0053159	0.977319
XLOC_200175	FBgn0033110	0.9874
XLOC_200175	FBgn0262144	1
XLOC_200175	FBgn0037916	0.972567
XLOC_200175	FBgn0263655	0.975207
XLOC_200175	FBgn0035468	0.995147
XLOC_200175	FBgn0001229	0.95959
XLOC_200175	FBgn0038486	0.967947
XLOC_200175	FBgn0261531	1
XLOC_200175	FBgn0038309	0.967363
XLOC_200175	FBgn0035023	0.957272
XLOC_200175	FBgn0031142	0.996238
XLOC_200175	FBgn0004635	0.955688
XLOC_200175	FBgn0260646	1
XLOC_200175	FBgn0033153	0.967719
XLOC_200175	FBgn0267042	1
XLOC_200175	FBgn0028899	0.969707
XLOC_200175	FBgn0050293	0.979997
XLOC_200175	FBgn0036311	0.957698
XLOC_200175	FBgn0036503	0.983515
XLOC_200175	FBgn0051354	0.987841
XLOC_200175	FBgn0035049	0.965623
XLOC_200175	FBgn0086708	0.973867
XLOC_200175	FBgn0038852	0.985857
XLOC_200175	FBgn0038851	0.99714
XLOC_200175	FBgn0038067	0.950691
XLOC_200175	FBgn0053136	0.963807
XLOC_200175	FBgn0013278	0.98695
XLOC_200175	FBgn0029856	0.970448
XLOC_200175	FBgn0263597	1
XLOC_200175	FBgn0036181	0.978894
XLOC_200175	FBgn0011722	0.961908
XLOC_200175	FBgn0028487	-0.97063
XLOC_200175	FBgn0042206	0.970319
XLOC_200175	FBgn0037073	-0.965861
XLOC_200175	FBgn0053922	1
XLOC_200175	FBgn0034489	0.970431
XLOC_200175	FBgn0085252	1
XLOC_200175	FBgn0063493	0.950887
XLOC_200175	FBgn0005660	0.988854
XLOC_200175	FBgn0038789	0.970648
XLOC_200175	FBgn0086782	0.983139
XLOC_200175	FBgn0039009	0.978856
XLOC_200175	FBgn0261630	0.976237
XLOC_200175	FBgn0037751	0.952633
XLOC_200175	FBgn0037753	0.976571
XLOC_200175	FBgn0035612	0.964084
XLOC_200175	FBgn0036363	0.957737
XLOC_200175	FBgn0005626	0.965252
XLOC_200175	FBgn0034005	0.988978
XLOC_200175	FBgn0052137	0.964279
XLOC_200175	FBgn0013277	0.993956
XLOC_200175	FBgn0013276	0.966863
XLOC_200175	FBgn0013279	0.95192
XLOC_200175	FBgn0034153	0.954169
XLOC_200175	FBgn0002842	0.964976
XLOC_200175	FBgn0035439	0.986503
XLOC_200175	FBgn0259957	0.957057
XLOC_200175	FBgn0259973	1
XLOC_200175	FBgn0259971	1
XLOC_200175	FBgn0033834	0.998406
XLOC_200175	FBgn0035693	0.962874
XLOC_200175	FBgn0034639	0.956655
XLOC_200175	FBgn0010042	0.960329
XLOC_200175	FBgn0036468	0.968765
XLOC_200175	FBgn0034278	0.958883
XLOC_200175	FBgn0263607	0.966261
XLOC_200175	FBgn0031301	0.998573
XLOC_200175	FBgn0035078	0.975718
XLOC_200175	FBgn0019890	0.960133
XLOC_200175	FBgn0000395	0.973736
XLOC_200175	FBgn0041246	0.980793
XLOC_200175	FBgn0001168	0.966491
XLOC_200175	FBgn0085438	0.966426
XLOC_200175	FBgn0053542	0.986933
XLOC_200175	FBgn0034718	0.962918
XLOC_200175	FBgn0033498	0.968081
XLOC_200175	FBgn0085404	0.950958
XLOC_200175	FBgn0038598	0.975558
XLOC_200175	FBgn0039071	0.959191
XLOC_200175	FBgn0050203	0.958439
XLOC_200175	FBgn0036057	0.965292
XLOC_200175	FBgn0003231	0.95173
XLOC_200175	FBgn0052982	0.958325
XLOC_200175	FBgn0030904	0.987104
XLOC_200175	FBgn0004102	0.964021
XLOC_200175	FBgn0000278	0.965632
XLOC_200175	FBgn0038018	0.972425
XLOC_200175	FBgn0033592	0.990755
XLOC_200175	FBgn0033204	0.965855
XLOC_200175	FBgn0262000	0.977596
XLOC_200175	FBgn0036681	0.973074
XLOC_200175	FBgn0038221	0.975693
XLOC_200175	FBgn0039010	0.958391
XLOC_200175	FBgn0039255	0.966284
XLOC_200175	FBgn0035763	-0.951459
XLOC_200175	FBgn0032139	0.954511
XLOC_200175	FBgn0001230	0.991652
XLOC_167175	FBgn0036090	-0.966602
XLOC_167175	FBgn0050447	0.978847
XLOC_167175	FBgn0039235	0.960969
XLOC_167175	FBgn0030077	-0.980537
XLOC_087548	FBgn0067903	0.991512
XLOC_087548	FBgn0262881	0.991973
XLOC_087548	FBgn0031276	0.960116
XLOC_087548	FBgn0034407	0.964053
XLOC_087548	FBgn0033215	0.950405
XLOC_087548	FBgn0040725	0.960807
XLOC_087548	FBgn0004240	0.99698
XLOC_087548	FBgn0263076	0.982015
XLOC_087548	FBgn0033830	0.97074
XLOC_087548	FBgn0052185	0.956465
XLOC_087548	FBgn0011672	0.966097
XLOC_077247	FBgn0052202	0.956802
XLOC_077247	FBgn0001225	0.957648
XLOC_077247	FBgn0040228	0.957467
XLOC_077247	FBgn0031378	0.952802
XLOC_077247	FBgn0263247	1
XLOC_077247	FBgn0003034	1
XLOC_077247	FBgn0032692	-0.951755
XLOC_077247	FBgn0259917	1
XLOC_077247	FBgn0050088	1
XLOC_077247	FBgn0033701	1
XLOC_077247	FBgn0263024	1
XLOC_069904	FBgn0085214	0.954284
XLOC_069904	FBgn0053764	0.954284
XLOC_069904	FBgn0027091	-0.966303
XLOC_069904	FBgn0023178	0.957148
XLOC_069904	FBgn0030859	0.952216
XLOC_069904	FBgn0028374	0.952818
XLOC_069904	FBgn0033110	0.959922
XLOC_069904	FBgn0262144	0.954284
XLOC_069904	FBgn0036663	0.951341
XLOC_069904	FBgn0001223	0.961305
XLOC_069904	FBgn0038486	0.980088
XLOC_069904	FBgn0261531	0.954284
XLOC_069904	FBgn0260646	0.954284
XLOC_069904	FBgn0038595	0.960733
XLOC_069904	FBgn0034870	0.957808
XLOC_069904	FBgn0033153	0.969615
XLOC_069904	FBgn0267042	0.954284
XLOC_069904	FBgn0265296	0.956564
XLOC_069904	FBgn0041184	0.953936
XLOC_069904	FBgn0036725	0.959261
XLOC_069904	FBgn0051354	0.971913
XLOC_069904	FBgn0035049	0.977213
XLOC_069904	FBgn0038851	0.958231
XLOC_069904	FBgn0036836	0.958996
XLOC_069904	FBgn0034540	0.98041
XLOC_069904	FBgn0013278	0.956794
XLOC_069904	FBgn0035088	-0.961343
XLOC_069904	FBgn0263597	0.954284
XLOC_069904	FBgn0050069	0.963223
XLOC_069904	FBgn0035756	0.954606
XLOC_069904	FBgn0011722	0.966462
XLOC_069904	FBgn0037073	-0.950203
XLOC_069904	FBgn0053922	0.954284
XLOC_069904	FBgn0085252	0.954284
XLOC_069904	FBgn0052369	0.961912
XLOC_069904	FBgn0005660	0.961445
XLOC_069904	FBgn0038789	0.959531
XLOC_069904	FBgn0033656	-0.969753
XLOC_069904	FBgn0039009	0.972462
XLOC_069904	FBgn0261580	0.952498
XLOC_069904	FBgn0261630	0.970484
XLOC_069904	FBgn0037753	0.992593
XLOC_069904	FBgn0035612	0.961427
XLOC_069904	FBgn0036363	0.957721
XLOC_069904	FBgn0039916	0.956203
XLOC_069904	FBgn0039478	0.956393
XLOC_069904	FBgn0013279	0.952558
XLOC_069904	FBgn0001257	0.962164
XLOC_069904	FBgn0030520	-0.95955
XLOC_069904	FBgn0035439	0.970912
XLOC_069904	FBgn0010551	-0.950544
XLOC_069904	FBgn0051955	0.95614
XLOC_069904	FBgn0259973	0.954284
XLOC_069904	FBgn0259971	0.954284
XLOC_069904	FBgn0033834	0.963335
XLOC_069904	FBgn0035693	0.965372
XLOC_069904	FBgn0027338	-0.961838
XLOC_069904	FBgn0036468	0.983456
XLOC_069904	FBgn0031294	0.974434
XLOC_069904	FBgn0032894	0.962005
XLOC_069904	FBgn0051606	0.953198
XLOC_069904	FBgn0000146	-0.950908
XLOC_069904	FBgn0031301	0.961786
XLOC_069904	FBgn0000395	0.95812
XLOC_069904	FBgn0041246	0.970282
XLOC_069904	FBgn0001168	0.967458
XLOC_069904	FBgn0035375	-0.9695
XLOC_069904	FBgn0039071	0.966002
XLOC_069904	FBgn0050203	0.96133
XLOC_069904	FBgn0261436	-0.966643
XLOC_069904	FBgn0263996	0.993709
XLOC_069904	FBgn0033592	0.980013
XLOC_069904	FBgn0270926	0.963245
XLOC_069904	FBgn0039010	0.956171
XLOC_069904	FBgn0243512	0.953431
XLOC_069904	FBgn0039255	0.95592
XLOC_069904	FBgn0035763	-0.955023
FBgn0262543	FBgn0052500	0.95041
FBgn0262543	FBgn0085193	0.969418
FBgn0262543	FBgn0259183	-0.975968
XLOC_228599	FBgn0038746	-0.963906
XLOC_228599	FBgn0024558	-0.95068
XLOC_228599	FBgn0010803	-0.952621
XLOC_228599	FBgn0010750	-0.972947
XLOC_228599	FBgn0037958	-0.95931
XLOC_228599	FBgn0026438	0.967676
XLOC_228599	FBgn0029761	0.969687
XLOC_228599	FBgn0265182	0.957464
XLOC_228599	FBgn0038576	-0.950615
XLOC_228599	FBgn0266579	0.955788
XLOC_228599	FBgn0031444	0.9792
XLOC_228599	FBgn0028685	-0.955221
XLOC_228599	FBgn0266421	-0.958156
XLOC_228599	FBgn0024956	-0.960511
XLOC_228599	FBgn0028893	0.95672
XLOC_228599	FBgn0026361	-0.951148
XLOC_228599	FBgn0029123	0.957015
XLOC_228599	FBgn0044048	0.953275
XLOC_228599	FBgn0034070	0.952814
XLOC_228599	FBgn0052442	-0.967159
XLOC_228599	FBgn0004364	0.977523
XLOC_228599	FBgn0004429	0.95965
XLOC_228599	FBgn0001083	0.967904
XLOC_228599	FBgn0038447	0.97099
XLOC_228599	FBgn0053983	0.951207
XLOC_228599	FBgn0001250	0.953335
XLOC_228599	FBgn0020378	0.950349
XLOC_228599	FBgn0036652	0.960753
XLOC_228599	FBgn0034122	0.968564
XLOC_228599	FBgn0259148	0.956828
XLOC_228599	FBgn0050052	0.977131
XLOC_228599	FBgn0036264	0.972717
XLOC_228599	FBgn0036888	-0.953304
XLOC_228599	FBgn0027608	0.979287
XLOC_228599	FBgn0264894	0.9595
XLOC_228599	FBgn0032785	0.978517
XLOC_228599	FBgn0024371	-0.961201
XLOC_000534	FBgn0003046	-0.953258
XLOC_000534	FBgn0038796	0.960234
XLOC_000534	FBgn0037191	-0.951508
XLOC_000534	FBgn0000274	0.950611
FBgn0267312	FBgn0040737	0.999761
FBgn0267312	FBgn0052391	0.999991
FBgn0267312	FBgn0262824	0.999994
FBgn0267312	FBgn0002869	0.987763
FBgn0267312	FBgn0051465	0.99998
FBgn0267312	FBgn0083992	0.976957
FBgn0267312	FBgn0053285	0.976095
XLOC_209426	FBgn0085295	0.995695
XLOC_209426	FBgn0001174	0.971358
XLOC_209426	FBgn0035551	0.960818
XLOC_209426	FBgn0036537	-0.972437
XLOC_209426	FBgn0051029	0.951369
XLOC_209426	FBgn0029716	0.969596
XLOC_209426	FBgn0030624	0.964346
XLOC_209426	FBgn0004594	0.999989
XLOC_000236	FBgn0032805	0.950132
XLOC_000236	FBgn0050178	0.952059
XLOC_000236	FBgn0051036	0.953417
XLOC_000236	FBgn0266064	-0.958287
XLOC_000236	FBgn0085234	0.952237
XLOC_000236	FBgn0027091	-0.952915
XLOC_000236	FBgn0015282	-0.970869
XLOC_000236	FBgn0052219	0.980725
XLOC_000236	FBgn0035402	-0.958493
XLOC_000236	FBgn0036474	0.967278
XLOC_000236	FBgn0042177	-0.954336
XLOC_000236	FBgn0036667	-0.960323
XLOC_000236	FBgn0005561	0.96007
XLOC_000236	FBgn0086901	0.968194
XLOC_000236	FBgn0030157	0.964331
XLOC_000236	FBgn0039238	0.957768
XLOC_000236	FBgn0261113	0.959991
XLOC_000236	FBgn0031639	-0.963359
XLOC_000236	FBgn0051866	-0.965233
XLOC_000236	FBgn0015221	0.968523
XLOC_000236	FBgn0261850	-0.980323
XLOC_000236	FBgn0031711	-0.975831
XLOC_000236	FBgn0036725	0.95268
XLOC_000236	FBgn0003463	0.950267
XLOC_000236	FBgn0004861	0.990859
XLOC_000236	FBgn0264490	0.985251
XLOC_000236	FBgn0037530	-0.951533
XLOC_000236	FBgn0035947	-0.964305
XLOC_000236	FBgn0010621	-0.98824
XLOC_000236	FBgn0039527	0.955355
XLOC_000236	FBgn0050069	0.96149
XLOC_000236	FBgn0031041	-0.956402
XLOC_000236	FBgn0052369	0.955319
XLOC_000236	FBgn0039023	0.969162
XLOC_000236	FBgn0035498	0.961058
XLOC_000236	FBgn0033401	-0.952286
XLOC_000236	FBgn0260867	0.953929
XLOC_000236	FBgn0032690	-0.9699
XLOC_000236	FBgn0000568	0.96111
XLOC_000236	FBgn0030735	-0.954639
XLOC_000236	FBgn0039478	0.973666
XLOC_000236	FBgn0000504	0.979429
XLOC_000236	FBgn0034484	0.972958
XLOC_000236	FBgn0001257	0.96728
XLOC_000236	FBgn0261548	0.965319
XLOC_000236	FBgn0031430	0.965661
XLOC_000236	FBgn0028968	-0.955857
XLOC_000236	FBgn0030520	-0.962903
XLOC_000236	FBgn0011296	0.956766
XLOC_000236	FBgn0261987	-0.95221
XLOC_000236	FBgn0038296	-0.969954
XLOC_000236	FBgn0031675	0.952149
XLOC_000236	FBgn0025631	0.982093
XLOC_000236	FBgn0003118	0.957834
XLOC_000236	FBgn0035031	0.976227
XLOC_000236	FBgn0027599	-0.970094
XLOC_000236	FBgn0031294	0.955611
XLOC_000236	FBgn0052529	0.965397
XLOC_000236	FBgn0035227	0.986805
XLOC_000236	FBgn0030309	0.978577
XLOC_000236	FBgn0000163	0.970427
XLOC_000236	FBgn0029686	-0.957808
XLOC_000236	FBgn0039807	0.970114
XLOC_000236	FBgn0029175	-0.953548
XLOC_000236	FBgn0029174	-0.950625
XLOC_000236	FBgn0039075	0.9618
XLOC_000236	FBgn0037563	0.968087
XLOC_000236	FBgn0020493	0.972933
XLOC_000236	FBgn0034909	0.954976
XLOC_000236	FBgn0033697	0.970178
XLOC_000236	FBgn0261436	-0.963193
XLOC_000236	FBgn0028550	0.952165
XLOC_000236	FBgn0031047	-0.973494
XLOC_000236	FBgn0263351	-0.967915
XLOC_000236	FBgn0027544	0.955967
XLOC_000236	FBgn0051755	-0.975677
XLOC_000236	FBgn0264748	0.967029
XLOC_000236	FBgn0243512	0.956004
XLOC_146029	FBgn0053257	0.958983
XLOC_146029	FBgn0034499	0.954319
FBgn0267311	FBgn0037169	0.958497
FBgn0267311	FBgn0023536	-0.967717
FBgn0267311	FBgn0038531	0.952483
XLOC_208343	FBgn0085214	1
XLOC_208343	FBgn0052594	0.955413
XLOC_208343	FBgn0035124	0.961167
XLOC_208343	FBgn0038240	0.963866
XLOC_208343	FBgn0034647	0.987503
XLOC_208343	FBgn0039257	0.954092
XLOC_208343	FBgn0032535	0.970354
XLOC_208343	FBgn0015519	0.969462
XLOC_208343	FBgn0085328	0.991111
XLOC_208343	FBgn0035168	0.987961
XLOC_208343	FBgn0051776	0.955504
XLOC_208343	FBgn0053764	1
XLOC_208343	FBgn0030859	0.976724
XLOC_208343	FBgn0053159	0.977319
XLOC_208343	FBgn0033110	0.9874
XLOC_208343	FBgn0262144	1
XLOC_208343	FBgn0037916	0.972567
XLOC_208343	FBgn0263655	0.975207
XLOC_208343	FBgn0035468	0.995147
XLOC_208343	FBgn0001229	0.95959
XLOC_208343	FBgn0038486	0.967947
XLOC_208343	FBgn0261531	1
XLOC_208343	FBgn0038309	0.967363
XLOC_208343	FBgn0035023	0.957272
XLOC_208343	FBgn0031142	0.996238
XLOC_208343	FBgn0004635	0.955688
XLOC_208343	FBgn0260646	1
XLOC_208343	FBgn0033153	0.967719
XLOC_208343	FBgn0267042	1
XLOC_208343	FBgn0028899	0.969707
XLOC_208343	FBgn0050293	0.979997
XLOC_208343	FBgn0036311	0.957698
XLOC_208343	FBgn0036503	0.983515
XLOC_208343	FBgn0051354	0.987841
XLOC_208343	FBgn0035049	0.965623
XLOC_208343	FBgn0086708	0.973867
XLOC_208343	FBgn0038852	0.985857
XLOC_208343	FBgn0038851	0.99714
XLOC_208343	FBgn0038067	0.950691
XLOC_208343	FBgn0053136	0.963807
XLOC_208343	FBgn0013278	0.98695
XLOC_208343	FBgn0029856	0.970448
XLOC_208343	FBgn0263597	1
XLOC_208343	FBgn0036181	0.978894
XLOC_208343	FBgn0011722	0.961908
XLOC_208343	FBgn0028487	-0.97063
XLOC_208343	FBgn0042206	0.970319
XLOC_208343	FBgn0037073	-0.965861
XLOC_208343	FBgn0053922	1
XLOC_208343	FBgn0034489	0.970431
XLOC_208343	FBgn0085252	1
XLOC_208343	FBgn0063493	0.950887
XLOC_208343	FBgn0005660	0.988854
XLOC_208343	FBgn0038789	0.970648
XLOC_208343	FBgn0086782	0.983139
XLOC_208343	FBgn0039009	0.978856
XLOC_208343	FBgn0261630	0.976237
XLOC_208343	FBgn0037751	0.952633
XLOC_208343	FBgn0037753	0.976571
XLOC_208343	FBgn0035612	0.964084
XLOC_208343	FBgn0036363	0.957737
XLOC_208343	FBgn0005626	0.965252
XLOC_208343	FBgn0034005	0.988978
XLOC_208343	FBgn0052137	0.964279
XLOC_208343	FBgn0013277	0.993956
XLOC_208343	FBgn0013276	0.966863
XLOC_208343	FBgn0013279	0.95192
XLOC_208343	FBgn0034153	0.954169
XLOC_208343	FBgn0002842	0.964976
XLOC_208343	FBgn0035439	0.986503
XLOC_208343	FBgn0259957	0.957057
XLOC_208343	FBgn0259973	1
XLOC_208343	FBgn0259971	1
XLOC_208343	FBgn0033834	0.998406
XLOC_208343	FBgn0035693	0.962874
XLOC_208343	FBgn0034639	0.956655
XLOC_208343	FBgn0010042	0.960329
XLOC_208343	FBgn0036468	0.968765
XLOC_208343	FBgn0034278	0.958883
XLOC_208343	FBgn0263607	0.966261
XLOC_208343	FBgn0031301	0.998573
XLOC_208343	FBgn0035078	0.975718
XLOC_208343	FBgn0019890	0.960133
XLOC_208343	FBgn0000395	0.973736
XLOC_208343	FBgn0041246	0.980793
XLOC_208343	FBgn0001168	0.966491
XLOC_208343	FBgn0085438	0.966426
XLOC_208343	FBgn0053542	0.986933
XLOC_208343	FBgn0034718	0.962918
XLOC_208343	FBgn0033498	0.968081
XLOC_208343	FBgn0085404	0.950958
XLOC_208343	FBgn0038598	0.975558
XLOC_208343	FBgn0039071	0.959191
XLOC_208343	FBgn0050203	0.958439
XLOC_208343	FBgn0036057	0.965292
XLOC_208343	FBgn0003231	0.95173
XLOC_208343	FBgn0052982	0.958325
XLOC_208343	FBgn0030904	0.987104
XLOC_208343	FBgn0004102	0.964021
XLOC_208343	FBgn0000278	0.965632
XLOC_208343	FBgn0038018	0.972425
XLOC_208343	FBgn0033592	0.990755
XLOC_208343	FBgn0033204	0.965855
XLOC_208343	FBgn0262000	0.977596
XLOC_208343	FBgn0036681	0.973074
XLOC_208343	FBgn0038221	0.975693
XLOC_208343	FBgn0039010	0.958391
XLOC_208343	FBgn0039255	0.966284
XLOC_208343	FBgn0035763	-0.951459
XLOC_208343	FBgn0032139	0.954511
XLOC_208343	FBgn0001230	0.991652
XLOC_142872	FBgn0000497	0.953464
XLOC_142872	FBgn0051973	0.954665
XLOC_142872	FBgn0011291	-0.974888
XLOC_142872	FBgn0035171	0.973108
XLOC_142872	FBgn0264442	0.957073
FBgn0267317	FBgn0085391	0.955202
FBgn0267317	FBgn0023523	0.97399
FBgn0267317	FBgn0037115	0.979922
FBgn0267317	FBgn0262483	0.952488
FBgn0267317	FBgn0036150	0.964904
FBgn0267317	FBgn0085395	0.95976
FBgn0267317	FBgn0037059	0.959422
FBgn0267317	FBgn0039804	0.956022
FBgn0267317	FBgn0051933	0.958976
FBgn0267317	FBgn0261549	0.965017
FBgn0267317	FBgn0051871	0.954954
FBgn0267317	FBgn0040905	0.958465
FBgn0267317	FBgn0045470	0.952194
FBgn0267317	FBgn0038209	0.962672
XLOC_154907	FBgn0085214	1
XLOC_154907	FBgn0052594	0.955413
XLOC_154907	FBgn0035124	0.961167
XLOC_154907	FBgn0038240	0.963866
XLOC_154907	FBgn0034647	0.987503
XLOC_154907	FBgn0039257	0.954092
XLOC_154907	FBgn0032535	0.970354
XLOC_154907	FBgn0015519	0.969462
XLOC_154907	FBgn0085328	0.991111
XLOC_154907	FBgn0035168	0.987961
XLOC_154907	FBgn0051776	0.955504
XLOC_154907	FBgn0053764	1
XLOC_154907	FBgn0030859	0.976724
XLOC_154907	FBgn0053159	0.977319
XLOC_154907	FBgn0033110	0.9874
XLOC_154907	FBgn0262144	1
XLOC_154907	FBgn0037916	0.972567
XLOC_154907	FBgn0263655	0.975207
XLOC_154907	FBgn0035468	0.995147
XLOC_154907	FBgn0001229	0.95959
XLOC_154907	FBgn0038486	0.967947
XLOC_154907	FBgn0261531	1
XLOC_154907	FBgn0038309	0.967363
XLOC_154907	FBgn0035023	0.957272
XLOC_154907	FBgn0031142	0.996238
XLOC_154907	FBgn0004635	0.955688
XLOC_154907	FBgn0260646	1
XLOC_154907	FBgn0033153	0.967719
XLOC_154907	FBgn0267042	1
XLOC_154907	FBgn0028899	0.969707
XLOC_154907	FBgn0050293	0.979997
XLOC_154907	FBgn0036311	0.957698
XLOC_154907	FBgn0036503	0.983515
XLOC_154907	FBgn0051354	0.987841
XLOC_154907	FBgn0035049	0.965623
XLOC_154907	FBgn0086708	0.973867
XLOC_154907	FBgn0038852	0.985857
XLOC_154907	FBgn0038851	0.99714
XLOC_154907	FBgn0038067	0.950691
XLOC_154907	FBgn0053136	0.963807
XLOC_154907	FBgn0013278	0.98695
XLOC_154907	FBgn0029856	0.970448
XLOC_154907	FBgn0263597	1
XLOC_154907	FBgn0036181	0.978894
XLOC_154907	FBgn0011722	0.961908
XLOC_154907	FBgn0028487	-0.97063
XLOC_154907	FBgn0042206	0.970319
XLOC_154907	FBgn0037073	-0.965861
XLOC_154907	FBgn0053922	1
XLOC_154907	FBgn0034489	0.970431
XLOC_154907	FBgn0085252	1
XLOC_154907	FBgn0063493	0.950887
XLOC_154907	FBgn0005660	0.988854
XLOC_154907	FBgn0038789	0.970648
XLOC_154907	FBgn0086782	0.983139
XLOC_154907	FBgn0039009	0.978856
XLOC_154907	FBgn0261630	0.976237
XLOC_154907	FBgn0037751	0.952633
XLOC_154907	FBgn0037753	0.976571
XLOC_154907	FBgn0035612	0.964084
XLOC_154907	FBgn0036363	0.957737
XLOC_154907	FBgn0005626	0.965252
XLOC_154907	FBgn0034005	0.988978
XLOC_154907	FBgn0052137	0.964279
XLOC_154907	FBgn0013277	0.993956
XLOC_154907	FBgn0013276	0.966863
XLOC_154907	FBgn0013279	0.95192
XLOC_154907	FBgn0034153	0.954169
XLOC_154907	FBgn0002842	0.964976
XLOC_154907	FBgn0035439	0.986503
XLOC_154907	FBgn0259957	0.957057
XLOC_154907	FBgn0259973	1
XLOC_154907	FBgn0259971	1
XLOC_154907	FBgn0033834	0.998406
XLOC_154907	FBgn0035693	0.962874
XLOC_154907	FBgn0034639	0.956655
XLOC_154907	FBgn0010042	0.960329
XLOC_154907	FBgn0036468	0.968765
XLOC_154907	FBgn0034278	0.958883
XLOC_154907	FBgn0263607	0.966261
XLOC_154907	FBgn0031301	0.998573
XLOC_154907	FBgn0035078	0.975718
XLOC_154907	FBgn0019890	0.960133
XLOC_154907	FBgn0000395	0.973736
XLOC_154907	FBgn0041246	0.980793
XLOC_154907	FBgn0001168	0.966491
XLOC_154907	FBgn0085438	0.966426
XLOC_154907	FBgn0053542	0.986933
XLOC_154907	FBgn0034718	0.962918
XLOC_154907	FBgn0033498	0.968081
XLOC_154907	FBgn0085404	0.950958
XLOC_154907	FBgn0038598	0.975558
XLOC_154907	FBgn0039071	0.959191
XLOC_154907	FBgn0050203	0.958439
XLOC_154907	FBgn0036057	0.965292
XLOC_154907	FBgn0003231	0.95173
XLOC_154907	FBgn0052982	0.958325
XLOC_154907	FBgn0030904	0.987104
XLOC_154907	FBgn0004102	0.964021
XLOC_154907	FBgn0000278	0.965632
XLOC_154907	FBgn0038018	0.972425
XLOC_154907	FBgn0033592	0.990755
XLOC_154907	FBgn0033204	0.965855
XLOC_154907	FBgn0262000	0.977596
XLOC_154907	FBgn0036681	0.973074
XLOC_154907	FBgn0038221	0.975693
XLOC_154907	FBgn0039010	0.958391
XLOC_154907	FBgn0039255	0.966284
XLOC_154907	FBgn0035763	-0.951459
XLOC_154907	FBgn0032139	0.954511
XLOC_154907	FBgn0001230	0.991652
XLOC_217453	FBgn0015714	0.953028
XLOC_217453	FBgn0026175	0.951412
XLOC_217453	FBgn0037083	0.960554
XLOC_204656	FBgn0036091	0.986246
XLOC_204656	FBgn0020642	0.959996
XLOC_204656	FBgn0039500	0.966532
XLOC_204656	FBgn0010548	0.950936
XLOC_204656	FBgn0051321	0.978337
XLOC_204656	FBgn0002733	0.957449
XLOC_204656	FBgn0032282	0.9773
XLOC_204656	FBgn0036698	0.973144
XLOC_204656	FBgn0038295	0.961872
XLOC_204656	FBgn0023550	0.970262
XLOC_204656	FBgn0033817	0.972481
XLOC_204656	FBgn0029898	0.95038
XLOC_204656	FBgn0034383	0.95177
XLOC_204656	FBgn0052255	0.952535
XLOC_142700	FBgn0036015	0.975941
XLOC_142700	FBgn0035886	0.951925
XLOC_142700	FBgn0029161	0.951647
XLOC_142700	FBgn0038214	0.952461
XLOC_142700	FBgn0051050	0.950127
XLOC_196643	FBgn0020399	0.977523
XLOC_196643	FBgn0261560	-0.994563
XLOC_196643	FBgn0034000	0.956785
XLOC_196643	FBgn0029823	0.956846
XLOC_220956	FBgn0262524	0.959273
[truncated: 38,833 more rows]
