# Supplementary material for: LncRNA mediated regulation of aging pathways in Drosophila melanogaster during dietary restriction
Source: Aging (Albany NY). 2016 Sep 27;8(9):2182–97. doi: 10.18632/aging.101062 (PMC5076457; doi:10.18632/aging.101062)
Supplement: Supplementary file 11 [file aging-08-2182-s011.xls]

## Sheet: Promoter_associated_lncRNA_deta
chromosome	Promoter gene name	Start position of chromosome	End position of chromosome	Strand	LncRNA ID	Start position of chromosome	End position of chromosome	Strand	Distance	Positional relationship
2L	lrr47	10517261	10517352	+	XLOC_010976	10524283	10524496	+	6931	Downstream
2R	lcp3	8435397	8435488	+	XLOC_067699	8437798	8437578	-	2090	Downstream
2R	Mp20	13246629	13246720	+	XLOC_071035	13255834	13255539	-	8819	Downstream
2R	Mp20	13246629	13246720	+	XLOC_071036	13256697	13255951	-	9231	Downstream
2R	Mtk	15408811	15408897	+	XLOC_072583	15418079	15417858	-	8961	Downstream
3L	Sgs-3	11512159	11512250	+	XLOC_115820	11515638	11515438	-	3188	Downstream
3L	Sgs-7	11509810	11509901	+	XLOC_115820	11515638	11515438	-	5537	Downstream
3L	ubiquitin	3902700	3902609	-	XLOC_109049	3893332	3892867	-	9277	Downstream
3R	ems	13901812	13901903	+	XLOC_142295	13909718	13909917	+	7815	Downstream
3R	ems	13901812	13901903	+	XLOC_166575	13911559	13911356	-	9453	Downstream
3R	hsp93	21296584	21296671	+	XLOC_148093	21296827	21298141	+	156	Downstream
3R	rotund	7285845	7285936	+	XLOC_161533	7295686	7295480	-	9544	Downstream
3R	Sodh-1	7052482	7052573	+	XLOC_161360	7054701	7054437	-	1864	Downstream
X	Gapdh2	15867811	15867902	+	XLOC_218066	15869876	15869671	-	1769	Downstream
X	hsc3	11807079	11807170	-	XLOC_196309	11805106	11806610	+	469	Downstream
X	sev	11086344	11086435	-	XLOC_196001	11079376	11079604	+	6740	Downstream
X	sev_2	11086255	11086346	-	XLOC_196001	11079376	11079604	+	6651	Downstream
2R	lcp4	8437604	8437695	+	XLOC_067699	8437798	8437578	-	92	Overlap
3L	primase	8340174	8340265	+	XLOC_112986	8340426	8339876	-	92	Overlap
3L	s15	8728435	8728526	+	XLOC_113215	8728730	8727960	-	92	Overlap
X	G6pd	19667264	19667357	+	XLOC_220979	19668134	19666884	-	94	Overlap
2R	hsc5	14256214	14256123	-	XLOC_054141	14265882	14266086	+	9668	Upstream
2R	lcp1	8431290	8431199	-	XLOC_067699	8437798	8437578	-	6288	Upstream
2R	lcp2	8434622	8434531	-	XLOC_067699	8437798	8437578	-	2956	Upstream
2R	sca	12780497	12780588	+	XLOC_070666	12777174	12776970	-	3323	Upstream
3L	abl	16647732	16647641	-	XLOC_099333	16653040	16654034	+	5308	Upstream
3L	abl	16647732	16647641	-	XLOC_099334	16656646	16659007	+	8914	Upstream
3L	abl_2	16647713	16647622	-	XLOC_099333	16653040	16654034	+	5327	Upstream
3L	abl_2	16647713	16647622	-	XLOC_099334	16656646	16659007	+	8933	Upstream
3L	hairy	8675712	8675803	+	XLOC_092363	8672262	8672474	+	3238	Upstream
3L	hairy_2	8675913	8676004	+	XLOC_092363	8672262	8672474	+	3439	Upstream
3L	Sgs-8	11509442	11509351	-	XLOC_115820	11515638	11515438	-	5996	Upstream
3R	dna	21671774	21671683	-	XLOC_148413	21671809	21672013	+	35	Upstream
3R	ems	13901812	13901903	+	XLOC_166557	13897118	13896901	-	4694	Upstream
3R	ems	13901812	13901903	+	XLOC_166562	13900172	13899970	-	1640	Upstream
3R	hedgehog	23141953	23141862	-	XLOC_174088	23146643	23146432	-	4479	Upstream
3R	Sgs-5	17595311	17595402	+	XLOC_169674	17586151	17585925	-	9160	Upstream
3R	trp	29920300	29920209	-	XLOC_179391	29927900	29927692	-	7392	Upstream
X	Act5C	5900824	5900914	+	XLOC_209835	5899946	5898233	-	878	Upstream
X	Act5C_2	5901935	5902026	+	XLOC_209835	5899946	5898233	-	1989	Upstream
X	lsp1	12490251	12490342	+	XLOC_215166	12480899	12480697	-	9352	Upstream
X	rudimentary	16656339	16656430	+	XLOC_218536	16646548	16645141	-	9791	Upstream
X	Ssrp2	16333558	16333649	+	XLOC_218392	16325208	16325001	-	8350	Upstream
X	Yp3	13759503	13759590	+	XLOC_197949	13755253	13755980	+	3523	Upstream
X	Yp3	13759503	13759590	+	FBgn0264381	13755322	13756013	+	3490	Upstream
