# Supplementary material for: LncRNA mediated regulation of aging pathways in Drosophila melanogaster during dietary restriction
Source: Aging (Albany NY). 2016 Sep 27;8(9):2182–97. doi: 10.18632/aging.101062 (PMC5076457; doi:10.18632/aging.101062)
Supplement: Supplementary file 12 [file aging-08-2182-s012.xls]

Gene_id	Cu_0.5mM_L3	Zn_5mM_Late_L3	Zn_4.5mM_AdMixed_4days	Cd_0.05M_Cdcl2_L3_12hr	Cd_0.05M_Cdcl2_L3_6hr	Cd_0.05M_Cdcl2_AdMixed_4days	Cd_0.1M_Cdcl2_AdMixed_4days	Cu_15mM_AdMixed_4days	Cold1_AdMixed_4days	Cold2_AdMixed_4days	HeatShock1hr36C_WetHeat30min25C_AdMixed_4days	EtOH_2.5percent_L3	EtOH_5percent_L3	EtOH_10percent_L3	Caffeine_1.5mgperml_L3	Caffeine_2.5mg_per_ml_AdMixed_4days	Caffeine_PreLethal_AdMixed_4days	Paraquat_5mM_AdMixed_4days	Paraquat_10mM_AdMixed_4days	Rotenone_2ugperml_L3	Rotenone_8ugperml_L3	AdMatedF_Ecl_1day_Heads	AdMatedF_Ecl_4days_Heads	AdMatedF_Ecl_20days_Heads	AdVirginF_Ecl_1day_Heads	AdVirginF_Ecl_4days_Heads	AdVirginF_Ecl_20days_Heads	AdMatedM_Ecl_1day_Heads	AdMatedM_Ecl_4days_Heads	AdMatedM_Ecl_20days_Heads	AdMixedMF_Ecl_1day_Carcass	AdMixedMF_Ecl_4days_Carcass	AdMixedMF_Ecl_20days_Carcass	AdMixedMF_Ecl_1day_DigestiveSystem	AdMixedMF_Ecl_4day_DigestiveSystem	AdMixedMF_Ecl_20days_DigestiveSystem	AdMatedM_Ecl_4days_Testes	AdMatedM_Ecl_4days_AccessoryGlands	AdVirginF_Ecl_4days_Ovaries	AdMatedF_Ecl_4days_Ovaries	L3_Carcass	L3_CNS	L3_DigestiveSystem	L3_FatBody	L3_ImaginalDiscs	L3_SalivaryGlands	WPP_2days_CNS	WPP_2days_Fat	WPP_FatBody
5-HT1A	0.28393405	0.94545517	0.895459953	0.091027459	0.008208863	0.489833746	1.025044549	0.321909047	2.312633668	2.185696804	0.405938645	0.682221805	0.375658143	0.129227485	0.196681395	0.818958248	2.21542323	1.001061494	1.121359389	0.223758267	0.140256488	6.01301565	6.038119047	3.813150972	5.737828614	6.209752586	3.689365796	11.33791808	9.759551196	7.450003093	0.434174083	0.471290745	0.276462251	0.102016631	0.089238543	0.090186477	0.189839575	0.613824564	0.021778274	0.007251239	1.128038553	6.767186515	0.093227134	0	0.439608609	0	22.87216322	3.286859363	0.233200579
7B2	4.366885548	4.357918123	9.852677121	4.058188962	6.545518447	5.012370679	4.570054001	2.726643654	20.25394439	15.23204154	6.455396488	10.6934583	3.946721636	5.626688206	4.290411504	4.805447445	14.09232244	10.53080545	17.90156339	4.279734564	7.0132835	55.16078273	64.19935749	63.1722822	61.94444839	71.22936362	81.79873321	113.9229938	113.2525432	157.4261523	5.180979299	6.216923338	7.151686262	4.839756917	2.561740093	4.964774288	1.17524736	2.315677567	0.015732204	0.03840951	7.280014634	43.79256961	4.653172765	0.058430769	4.102380972	0	60.63453789	2.506528554	1.945454682
AGO2	165.6280265	159.8420246	125.6977484	60.47253051	44.87735097	94.46525839	113.0642619	111.5854074	264.1949455	210.7298928	94.31506418	126.8475304	74.04616054	76.73341534	86.27630929	106.0007512	197.2800514	111.4759858	162.2320077	44.99921164	50.52779774	94.23494714	81.75860175	58.90369334	119.6376448	88.8846368	67.46055203	125.8775259	86.97507872	103.7598144	85.89239321	70.05323368	90.02717482	53.11892585	65.93824608	76.60048737	44.69502937	78.37433076	83.27428628	138.0816711	134.2480897	164.4733588	126.9705981	110.7177815	81.90152957	41.88453256	91.7621317	53.2140216	91.26171147
AQP	1.086032249	2.16432759	1.003281539	1.067758552	2.252372216	1.945131046	0.648323703	0.395404582	1.198021067	1.812963157	4.610154538	5.542181644	1.538014975	3.137974525	2.164388531	1.168992824	1.236400743	3.746777013	7.419702558	1.094406595	3.06176619	1.675846538	1.385752395	1.175998882	1.462159467	0.728521226	1.402843465	3.015663371	1.112753972	1.565543443	8.623365725	5.814260217	4.422944648	0.744849562	0.271943078	0.243199949	4.456161131	0.557766327	0.011469096	0.117315348	0.309723539	0	0.024384921	0	1.600455608	0	0.229520835	0	0.141682929
ATbp	0.484978312	1.989898204	1.967331207	0.958773171	0.976020071	1.864027799	3.230381142	1.876108551	2.585540295	1.254846986	2.562641633	5.949402575	0.916269	0.673775681	1.080175931	4.356067419	1.546146911	4.16313535	4.383449265	1.503726593	1.126603703	1.25317471	1.448400594	1.230663996	1.745457496	1.147682296	1.798963588	1.394307423	1.547728697	1.892478308	0.712904108	0.81676663	1.447498669	0.81636944	0.805568738	0.609598813	2.189170483	0.922930607	7.030541835	4.835738559	1.916598949	3.760974943	1.627643643	0.38453236	3.534800418	0.314618248	1.91506342	0.206025229	1.287022317
Abl	3.953499158	4.094578867	9.512050189	1.795331784	2.1791367	10.31313713	22.64309382	19.7536461	14.55030827	10.78811148	9.551264815	23.60628977	1.580999803	1.672773581	1.724480236	20.90732937	14.33818598	16.79129313	19.29522929	1.428857571	1.621454007	14.80483584	12.31610294	10.11169399	13.74974493	13.87549958	9.022251463	21.53775872	20.57688268	19.10522257	4.631428562	5.4106076	4.83135436	1.904017654	4.055639369	2.776119457	5.819185331	6.949435494	34.56576782	33.79604924	17.15411076	51.76009942	3.387686513	1.216543964	16.73684182	0.67351596	37.63040836	7.745722947	6.592305478
Ac3	0.174305069	0.291231866	1.31885333	0.402263129	0.145216722	0.308124769	0.638406211	0.309751152	0.874944406	0.646956591	0.295600558	0.611961054	0.225252968	0.187359394	0.303969719	0.874683273	0.721579624	0.790671108	1.272873697	0.252689235	0.108107344	7.111096644	5.672320574	3.572215728	7.550641223	6.33255658	4.862450127	11.53182507	10.40255546	10.10712966	0.538619178	0.61872651	0.312624049	0.035600835	0.03069504	0.032691354	0.050162639	0.291552138	0.03475679	0.020912232	1.29819726	6.60005357	0.064091324	0.011584349	1.207349276	0.039670129	20.74421442	1.851959444	0.307276425
Ac76E	5.556448074	5.221358343	6.609229092	4.009634437	7.061257109	7.460816915	5.779390915	3.899028599	2.28907148	1.525742254	5.82007598	4.95378787	5.500398599	7.505621403	5.048795469	3.838498361	2.276018293	5.495757701	7.51071491	6.360399626	8.52272034	7.816014084	10.22577225	9.118126486	9.644723365	8.242095838	11.12455111	9.506590015	10.05419478	9.621865061	9.717993454	11.95652352	9.4818447	3.225338493	4.164287633	4.413057402	0.986358186	4.794750419	0.234706389	0.092320866	5.774967072	1.751543101	2.095592161	0.356155509	0.934089763	0.051579944	7.643372468	0.007949784	0.172642217
Ac78C	0.371621339	0.305446293	0.99023908	0.34138536	0.34838431	0.564384125	1.053108136	0.672545809	0.605355019	0.428557314	2.230855078	2.211174599	0.860595132	0.512158376	0.81850215	0.556559057	0.680084578	0.653995258	1.154432817	0.344703111	0.323285001	0.964530332	0.943331397	1.039212615	1.058187098	1.037542964	1.375709722	1.43896522	1.291680629	1.586889934	0.731404293	0.735946998	0.757016661	0.724672824	0.848948696	0.896226664	0.309865834	1.604894286	0.0637103	0.061419948	1.161114976	2.204524868	0.582164493	0.113377822	0.519077792	0.046119225	2.740182043	0.921197557	0.135952898
Acsl	13.42668778	8.287771782	24.04754729	11.54337147	17.0991798	22.02865059	31.32781414	27.06868739	15.43567532	11.40063717	28.51255433	41.26240342	20.70525013	18.36270839	17.07425678	36.54595739	16.85166367	42.8012623	37.55838834	19.52772093	14.0288189	35.64232548	63.05534438	52.91666025	42.75126833	50.39378532	62.31667121	54.01761333	53.80793254	75.05032438	46.57368578	57.26943404	54.75144578	46.41529801	43.74598332	39.48572505	16.22215703	22.28365163	42.43626926	36.81569045	10.54864026	13.06528493	7.365270452	5.433909784	12.59056526	1.78338872	14.72574415	7.17251227	5.322858862
Act57B	3551.664557	2946.102118	301.1192159	2672.517844	4600.20659	3886.722283	102.7928668	85.31144825	247.4925481	184.667523	2748.138267	206.511891	4832.85375	6508.551517	6518.184324	131.2153748	451.657744	268.5281627	338.1109796	4924.513	7379.967114	949.6310445	350.8156393	263.9198013	1822.791452	360.5829048	288.8443596	908.3071411	295.9410672	423.5185848	942.6387775	505.5707207	357.8782559	324.621558	228.9735378	194.3850769	31.57183476	142.421061	23.61819387	9.018903775	1431.179429	89.1982029	49.51124344	1.402074068	41.73958298	5.728321131	90.37099261	48.47490922	2.35899504
Act79B	0.94323155	6.867425962	143.90832	0.454444601	0.481971933	59.84021169	129.0933153	51.65630237	302.913256	136.3183798	246.8871807	440.1286761	0.61667196	2.603692588	0.480066776	74.93558406	148.9000234	312.771975	384.51807	0.760810709	1.509299272	249.9491482	22.58351143	21.31442092	404.0310534	67.25870691	27.88262143	298.202447	56.36294787	47.52818178	3734.269773	833.6740349	174.7070803	16.98595613	4.934705984	2.084627815	4.53272223	8.47322718	0.2092791	0.260571532	10.8412761	0.423980646	0.733915769	0.878723101	0.201093294	0	141.2401476	66.31144991	0.436226494
Act88F	0.44818246	0.628436383	62.60394799	0.120029721	0.410083264	6.867075825	18.62688526	12.52553084	87.7321927	39.16281786	80.86751102	111.5719599	0.185929012	0.470744342	0.282999133	28.26262498	45.65908736	58.08430914	82.02820638	0.422400237	0.024574282	3.283901817	0.950775205	1.681989029	50.41361132	2.749161393	2.401309206	6.35767971	2.033616235	2.931407322	2656.792396	311.2855905	59.30081977	10.09955417	4.557512079	0.156128031	1.344846808	0.597198685	0.094827432	0.143499717	5.358962963	0.513415077	0.088452393	0	0.082792718	0	38.81270311	23.77796213	0.091377789
Ag5r2	1458.056656	1010.968731	114.9018299	1495.792944	3272.371393	1302.39379	2.159197794	31.58103382	293.6256254	341.0201259	1279.982617	29.65244336	2217.209816	3383.496175	2289.254209	2.000422766	255.2597087	14.85838321	31.5599158	2952.079879	3624.428998	0.183448469	0.205157757	0.115502099	1.199529506	0.058847849	0.092097858	0.054006916	0.027688414	0.056814658	1.422615439	2.795851654	7.148234712	938.8851904	434.5409312	499.7425567	14.46157464	10.25181863	0.031355724	0.005415663	12.49135663	0.398490464	1840.919583	0.739618681	330.4158345	62.56896163	1.380958267	0	0.366758061
Aldh-III	21.12010749	14.54944145	15.73252181	24.35570496	33.01611139	25.43804834	17.79716542	11.97352609	13.83056834	11.45953829	24.33185708	23.78259753	26.42626358	26.0661777	30.92557047	21.34134112	15.95351369	27.05021719	25.98899196	24.64930055	30.79371153	24.5233631	20.78988172	20.64869064	26.5485236	22.08941682	20.93030868	41.09188838	37.90828762	41.91227938	39.77387601	43.6834755	43.05310904	19.79593617	22.0135027	15.11385537	26.2547882	16.77503851	23.38664378	22.02848956	30.40709011	21.61503167	13.89867385	17.98538803	18.31810359	9.178507428	17.36501942	51.25217824	24.12586361
Alk	0.607501583	1.258365438	7.444670223	0.930048865	0.646612836	1.773096781	2.174352434	3.691799616	2.383136517	1.867213331	1.465221448	1.982914472	1.012238523	0.637705651	0.990447097	2.615215714	2.359483708	3.67783287	3.754206713	0.841356568	0.830655114	16.15860253	15.94358322	11.80296402	18.41609701	19.40703562	12.35201002	25.56973794	29.94317957	27.35175388	5.754499701	5.395068678	4.091471613	0.145263439	0.338942947	0.084048254	0.041443634	0.863961763	0.012173239	0.026808564	7.334214696	25.13544753	0.098125818	0.007122203	1.791404753	0	48.08473582	11.00253647	0.902569864
Amy-d	52.47807412	92.42330552	182.7901473	27.51349711	136.6764556	41.97345493	9.859415894	18.15483429	179.2794455	159.7884626	152.4310608	130.0142743	76.33206912	62.95275395	354.873933	256.0607217	139.9695148	232.286259	1090.00061	93.30895565	148.5754798	12.36995218	18.98753368	89.25729666	16.08042778	13.80525665	74.02523146	21.4250445	37.32100012	86.75972093	220.2362658	176.3801595	484.9956318	7229.045108	4909.346915	12318.22215	97.8428107	88.24230732	0.142306747	0.055152505	6.873404634	0.300765667	621.4607543	0.813261931	287.0844692	8.50176242	0.917293346	2.725183678	0.27977173
Amyrel	9.387364132	9.059286569	0.937396189	15.32927977	51.95734115	16.77371018	0.584239706	1.297481885	1.895838824	2.312583077	13.22001096	0.602562063	20.0726169	13.18397912	117.5148224	0.189052148	1.528572934	0.238051318	0.925869964	66.45161862	75.08235572	0	0.019190809	0	0.272046795	0.132368579	0.086938714	0	0.105361594	0.157816048	0.091239472	0	0.55770309	4.791705866	2.068863737	3.226406932	0.044753739	0	0	0.003041156	0.162321337	0	26.66819793	0.065805034	23.61394371	1.037018382	0	0	0.094784883
Ance	115.1668492	74.05178146	52.3845097	109.1737372	150.9192119	78.79452138	22.39191481	12.01771107	62.584745	53.21156807	62.5890606	34.62246674	122.7515258	101.2990539	109.3738568	34.33072145	39.17068806	56.80798841	89.84600497	107.8930068	116.9190615	11.41458897	10.26206604	14.84036026	16.85333183	11.35551714	14.3944741	24.17174792	19.58727199	29.739971	21.99813951	19.4131823	25.93107433	410.8455015	300.4128362	371.1360917	189.7746799	51.79871927	1.188522482	1.475183074	495.8905124	128.7573725	100.1974721	53.43500909	133.4925376	6.473174448	5.62717584	79.20911483	327.6753067
Ance-2	0.072151278	1.293263778	0	0.413678794	0.242994473	0.620962524	0.599735654	0	0.009977833	0	1.05130982	0.795198288	0.839099548	0.477129452	0.749833867	0	0	0	0.098763813	0.462322252	0.183819713	0.368027474	0	0	1.399847849	0	0	0.54764298	0	0	0.464410301	0.061523013	0.053566953	0.347634314	0.120954592	0.22766213	0.687471779	0	0	0	0.346587839	0.024877476	0	0	0.242704585	0	0.107826205	4.518809494	0.205916645
Ance-5	3.090608844	2.455132117	2.098720953	4.435698645	6.246543969	3.256674643	1.517722631	0.761860675	0.872991416	0.165843001	2.457691493	1.402368497	5.276515077	4.737342387	4.565410385	1.19226798	0.718895092	1.902530895	2.184761272	6.527514617	5.88454855	6.954491716	14.5777487	30.50640128	8.608387811	8.871602238	32.34981519	13.12284313	27.38783481	89.27006421	11.52904581	12.03050518	23.9112951	1.795603646	0.706009998	0.659226638	0.769380866	1.351160582	0.06994432	0.032984989	1.763969632	1.098167082	0.195781161	0.14801063	0.091678862	0.148022268	0.555314428	8.542091242	0.718300263
Arc1	3843.861971	1647.888278	407.1878288	1374.702595	1560.89514	992.0713004	633.2309547	301.9974554	1361.931851	1421.140925	812.5050382	437.8913233	1770.393474	1744.804385	2094.561167	310.6589235	786.3919013	190.3501573	705.7614337	1888.297666	2015.812694	72.31285108	58.76296178	121.1776316	109.599484	77.83376761	151.8178202	85.44024181	81.76584885	213.0070035	439.1751298	407.8176166	1096.953273	1462.664929	862.5701469	1582.364205	556.7464173	4036.065333	211.1154178	185.4100017	756.7194868	369.5929423	3853.295638	171.5793988	519.7555708	769.6163004	93.55989211	399.0804804	200.6929814
Argk	711.3618216	428.8787009	115.650349	531.3958798	1127.161588	684.0448063	75.54247067	73.46330505	92.95249234	67.99028332	662.843284	157.3791779	682.2646569	1024.309683	646.9289572	76.61226126	120.5242493	188.8578916	184.5956086	747.5679771	1020.350396	259.5408174	166.897386	139.2503639	278.6557606	210.7142869	164.1083219	371.5125211	289.148044	261.648984	434.2401143	277.2877652	161.0370807	293.6733723	235.5131935	197.2354593	136.3563599	81.22415358	78.34042214	76.23285051	211.7095127	189.582381	53.77916343	3.674342583	145.6371597	5.610176046	237.9402287	123.5860873	27.53378311
Arr2	2.557083759	4.047904255	159.2050245	0.072094943	1.121556184	75.96268049	185.7972385	86.52421251	109.2602918	88.08801671	102.3980132	258.9419185	0.186785453	2.840419387	0.234228688	174.6569134	79.90037538	288.9085572	335.0451563	0.725654417	0.427440478	1383.779991	1935.692191	1979.333367	1522.670908	2145.121222	2521.15799	2707.946798	2757.6692	3652.80006	1.861763819	5.503134087	1.726557255	0.389779878	0.699516546	0.647950052	5.039796358	1.614683846	0.278073272	2.003454494	17.37343925	0.030487121	0.04912229	0.044524022	0.173833281	0.334164418	4.749428874	0.679117462	0
Atf3	7.80645554	8.760854028	22.65795789	6.706793225	5.295284169	9.955952716	12.09834217	14.46616248	6.441712665	4.761503638	9.896354038	8.26417349	10.29517285	7.870257755	10.17850359	11.69431512	6.689410254	12.25104707	15.41807046	6.461435085	4.293163721	17.58874887	22.75554407	14.37367538	19.83291967	19.32462457	15.63870077	21.244341	26.40179066	26.33733463	24.08834507	27.99956023	24.32221113	11.29428348	19.99762911	18.63397855	0.679977904	8.173070231	3.370335373	3.372077237	11.59069498	6.437525321	10.68517383	7.828656728	6.618518313	1.865169935	4.92117079	3.409596293	1.154094393
Atg2	3.213580869	3.848445382	6.045806016	6.280276682	4.190533275	8.316064362	12.82364421	6.858619292	9.860515309	8.490374674	9.129655785	16.33610072	6.803620132	3.634168863	8.712006904	12.81236733	7.337313704	12.48648433	15.8163729	4.194733298	4.03276339	7.951168611	9.668540227	14.39974577	7.944126276	8.159463126	17.02436662	9.369128283	8.803748994	13.27071431	10.19202663	9.122170546	12.54006708	5.095032974	5.868431781	6.900054754	8.009250709	8.886101477	17.86838725	15.56558602	26.09094979	8.121127941	24.31706528	5.14010702	10.89346688	3.614435609	4.766212196	4.637583511	25.35331032
AttA	1.883372892	0.024795222	31.37720336	3.792811231	26.0011943	4.007488985	6.521875113	24.48106727	7.836984783	1.970464074	15.11775033	11.64260272	57.8632571	64.29984362	33.10085023	2.429694511	2.48617261	1.416508045	3.235901484	76.13625736	25.36982694	15.51658975	22.72210111	196.6528245	16.78693692	51.06326196	482.3837668	13.67397675	28.73101668	145.5837764	83.03870607	57.35081471	402.2774043	10.82683534	3.255062507	17.31544631	1.58067611	0.069828876	1.195636597	1.436091444	14.23429712	1.995466603	1.032726096	24.76418601	0.294841164	0.251970161	1.428147828	20.92690624	6.509411407
AttC	8.957598204	10.18153494	92.3676036	11.1625421	214.8351098	15.53294573	25.75828144	47.79124099	51.05797576	6.773879913	38.18990616	34.34535336	139.1584529	159.4023382	154.8640706	9.27741504	20.26558793	5.381535021	6.976432545	280.2213073	112.8691375	62.4614033	46.67597028	339.7713036	26.91159648	124.3674465	727.067357	32.97848457	24.33939994	173.7019665	229.8271307	150.6594629	913.4496157	26.09446771	4.342906776	32.98314423	16.78939433	4.741040844	1.093796618	0.263262021	6.352108528	0.272703196	0.746336777	90.18708025	1.524162098	0.506789705	0.438447913	4.437709304	9.594321017
AttD	0.035369466	0.61213287	7.776702534	4.273844236	9.331466416	2.392166171	0.218634975	3.342356421	0.266499558	0.161801541	7.643251991	0.9618115	24.78444632	15.0195397	18.61795355	0.57950849	0	0.486352682	1.291826261	39.38239653	17.562725	0.05969508	0.199804798	0.484064003	0.472938567	0.418724913	1.87869171	0	0.930815617	2.643102926	1.692904053	0.497560009	4.093470917	4.273871331	0.900852453	4.843127734	0.085676924	0	0.071972315	0	0.428582322	0	4.787437324	0.548809192	1.88042085	0	0.344692144	6.455636048	0.776945577
Atx2	11.21622672	12.60252989	30.86677525	6.274110773	4.762740773	21.9071877	48.54893552	48.97807261	32.06582108	23.59803061	17.80640417	38.85797213	4.428923601	4.011129748	4.091553685	46.22374271	28.77985064	38.41718741	32.74423512	2.427751899	3.659817445	32.5321611	25.83048868	20.86864461	31.94046769	32.05296615	19.41628124	49.80528383	46.51963607	36.74908025	19.29971618	20.83401187	21.00039326	6.47446158	12.34281682	10.31685371	21.88125056	28.47780222	58.60727429	58.40842991	53.3725786	65.56407029	22.72590035	12.11533084	44.77534893	2.564823598	36.66672467	21.74162893	85.29907851
BM-40-SPARC	278.0631464	173.4283291	65.89627448	159.5939308	409.6258244	225.6061723	37.05777221	23.52040261	96.86678027	78.43330757	226.3600557	93.23268854	308.5335144	417.8241305	238.7615994	51.59899356	71.4076321	104.8303948	113.4048087	333.7652101	549.5768116	254.9063867	339.6835799	294.9130313	314.1207936	237.4749362	369.4395458	291.0501957	239.6844061	340.0608419	276.0907684	209.5925268	190.1733495	56.5258463	26.91788894	19.52921249	37.03871582	56.15459513	11.85428162	10.22419217	56.72215318	43.99338949	17.01873396	470.4613492	33.02154354	13.40525659	57.51870191	378.6330927	288.3169875
Blimp-1	0.557249245	1.796571519	8.722519384	1.407982499	0.10299184	1.866748571	4.814840864	5.943957339	5.851025607	3.996289508	1.45404095	3.765079742	0.121777276	0.167029222	0.200423543	5.329272698	5.028116208	5.111645837	6.728620458	0.109933581	0.039773285	7.523456165	8.49925236	8.763670298	9.574208411	10.5045436	8.185526288	11.9850632	13.211995	11.80661886	7.308179653	6.889418297	6.311911311	5.937470838	8.576240913	8.405788125	0.325596985	4.393969292	0.080590621	0.085272003	11.40930307	5.403744272	0.626292035	0.087346792	15.02967862	0.120395498	38.8504245	1.281788982	4.753188633
C1GalTA	7.705057214	24.30420251	13.59253003	10.03335218	6.280174218	10.81227037	18.96550782	12.75011267	71.75700025	60.17704905	16.01633033	25.76658016	6.702604134	6.781021563	6.025907734	18.30173111	42.27868185	19.36403707	18.82178217	7.297049074	7.229916828	8.910671236	8.40651977	6.002077492	8.062416207	10.11931254	7.82393276	13.26739	12.61016932	14.87937869	5.08458195	5.611760109	5.18391925	16.67642892	12.02397607	13.54189562	5.616512497	2.378988341	32.45812913	26.57370107	6.080180571	14.50974882	28.36545548	2.280378617	7.605894017	6.7069643	19.46499183	4.964572325	20.99455417
CASK	2.55622845	2.68919725	13.48582748	1.671288561	1.110142876	5.465691707	10.52152764	11.63697614	8.93420947	7.074463425	4.545699622	7.865560819	1.517361462	1.979270362	1.722889624	9.751221983	8.34212527	10.11926501	9.619663159	1.521862637	1.287435761	46.80648487	38.78265344	18.36721147	46.17746512	45.06614602	17.48571844	67.71594197	70.30385744	53.05004999	4.755265102	5.573284888	3.822506704	2.435730285	3.116956304	2.724924363	0.380716999	2.390383016	7.597013426	9.948783482	6.340361802	30.24514076	2.759818063	0.920906178	4.679049141	0.386268997	77.25569053	10.54040484	2.660124089
CCHa1	1.98603547	2.070578569	4.238385714	1.546775477	2.058095982	1.572049131	1.667750469	2.055790869	2.710662041	4.314893221	2.186786552	1.866253535	2.634045771	1.731169084	2.17470916	3.466521604	1.061683431	2.53813763	3.884031874	2.700878083	1.177433783	4.000392417	6.728443589	2.978461642	3.404095099	6.549070339	3.06658459	7.184516877	9.747344898	13.81449013	1.843266876	4.001927299	3.288877515	6.389472173	7.349526354	14.0650385	0.578357319	1.258436924	0	0	0.461973114	1.814484973	9.498882129	0	0.809486919	0.276042178	4.099567258	0	0.268437205
CCHa2	32.05744186	9.422889055	22.23639949	27.31578034	22.84937851	9.782406459	4.045849564	7.751211729	5.878622505	5.785365285	10.99542316	4.139054568	16.07541503	10.86550918	7.888482962	6.77352991	10.83619642	16.82581507	5.431375234	18.49362091	11.11588972	67.37821958	69.97401129	42.03263684	51.95855798	30.21643642	27.18491132	41.71275432	56.5999298	37.29198362	59.10153872	69.23479896	30.52804286	61.07500868	62.34496093	59.72614151	1.36914277	1.978391432	0.089230355	0.042966066	2.709295416	4.432451249	37.74322308	11.38618015	4.36926709	2.929097774	6.344172293	102.1664647	121.112993
CDase	6.48290307	4.125725153	2.82241068	2.952247231	10.52374942	5.932664725	1.333640369	0.985328907	3.38588742	2.785713551	5.431516222	2.946188987	8.367557357	9.126724089	12.90583605	1.206069366	2.157473139	3.460161939	6.527665748	10.62575173	19.0932957	4.910725836	6.126384659	7.848549205	9.812959063	7.124349075	10.36331506	12.69756317	11.67627959	16.1627334	2.086364894	1.711106004	2.037386807	23.78201501	19.18199757	24.54676133	2.670566434	2.234154263	0.07454052	0.028848595	3.430453186	5.73225343	8.462834512	1.749093694	5.223791687	0.259908587	6.021259547	8.189217944	7.358158725
CG10014	1.264463429	1.201442862	7.761377272	1.991377075	2.316355222	2.252873927	2.028403364	2.027338703	3.64192902	1.612092653	3.137741885	6.643661941	0.706979176	1.070560985	1.111024403	1.390285402	2.55797928	9.292708813	11.07255988	1.062772144	0.827888095	0	0.010248268	0.175215305	0	0.026499498	0.024131179	0.118451007	0.085778265	0.00680631	0.241127124	0.233232509	0.690357337	0.695616096	0.363793708	0.385585652	208.958535	21.75271085	0	0.003227516	0.046159457	0	0.611235988	0.162193482	30.10274785	0.03024589	0.280112012	12.45702822	7.352191486
CG10041	0	0	0.029732389	0	0	0.011999192	0.311140795	0	0	0.227851237	0.772110919	1.00205192	0.069832483	0.066178024	0	0.009686606	0.21249062	0.436511693	0.881645912	0	0.156932092	0.007332943	0.007402081	0	0	0	0.010252575	0	0	0	0.069709871	0.087047494	0.396199253	0.278742352	0.173024277	0.095554273	1.577033301	47.15825642	0.043951743	0.111341658	0.060287801	0.157644531	0.056289316	0.06769557	0.243449477	0	0	0	0
CG10082	7.807576432	14.23237906	23.58350741	8.622091399	7.018633054	13.89569748	20.57759185	26.6064177	32.92514078	30.91856544	12.45561884	25.2995259	11.37669868	7.324322414	7.681585409	16.79591435	20.41909443	19.08611804	23.31238229	5.194096884	6.079940652	49.18973896	46.547459	30.47643116	44.02255935	53.26394141	31.98112222	70.70792203	79.64843013	55.20118841	17.53052219	18.86744242	16.00506507	8.15361739	11.20473	11.62957539	4.606495912	9.575850763	10.11555451	9.049533684	25.95558468	49.93154954	31.87552546	15.04671924	19.20424384	7.546013118	121.7989332	70.48387703	14.15881728
CG10116	4.00665095	4.28002208	3.55106661	10.45439118	12.19278402	10.02275599	6.756310833	1.190594885	4.054506582	1.476815605	9.025983531	14.32492322	14.92691395	11.40307173	12.21151895	7.434852747	1.501920258	10.89466907	12.9858295	17.48680289	22.63697802	0.325529283	0	0.386361424	0.088768655	0.033474783	0	0.032421924	0.091611657	0.021391694	0.171275567	0.261054033	0.468360743	47.12462295	35.80895915	49.01641513	2.92561547	1.983886484	0	0.020265264	0.195938409	0.036013953	22.8204104	0	2.596349556	0.719164705	0	0	0.083243997
CG10126	22.49090074	25.92460765	47.78276173	61.51177818	22.91301969	19.98952422	37.92487631	25.16148396	19.17671672	21.24463509	16.49329197	22.95749545	35.70003269	25.62283707	25.37448421	21.10941032	22.66119376	28.08000229	33.75384123	23.58681135	16.1859398	15.68594802	17.20779855	18.0300982	12.24618245	20.94878716	17.84473045	16.06032335	25.24599755	40.63125073	14.84183093	19.16246078	26.15176337	19.42174881	16.16999452	21.14881193	114.9639636	187.4551342	1.561163227	2.186026186	69.05706964	20.84457206	11.13295393	0.570270119	38.24031405	117.3811278	6.437232505	12.77294185	10.38508397
CG10131	1.384971163	1.231932346	0.477904943	6.738093396	7.157463295	5.217957659	0.161313073	0.018857052	1.272874313	0.577354116	2.528069628	0.507866605	5.844613632	5.442324722	5.575718324	0.194687801	0.253241517	0.938016973	1.225393642	6.412781149	8.972303106	2.507576821	2.473218236	4.450793509	2.731185803	1.346362953	3.995485224	2.180079105	5.527065982	6.560360033	2.217932112	1.716899911	1.964582874	0.672563087	0.244695905	0	1.697109562	0.334229571	0	0	2.842491922	1.815043134	0.799368764	3.405127449	0.070399914	1.014091193	0.622580905	13.09497183	1.0310328
CG10140	0.646873195	3.666743084	2.19850384	25.23808894	16.95006936	9.999559753	11.75807556	4.683422453	1.715758873	2.362870691	6.16614816	8.431467734	18.61703928	15.60705033	17.6455459	0.848904475	1.738289255	0.179817945	0.770655984	18.51556833	9.799744197	0	0	0	0	0.009526893	0	0.019801097	0.10803354	0.019347237	0.409970523	0.327455059	0.095950171	2.896442844	0.474968631	0.949207397	0	0	0.017817268	0.037222512	1.373048489	1.425524198	42.94419177	0	2.259574074	0.681499965	0	0	0.677478861
CG10163	0.238376962	0.370178901	0.597115719	0.058545051	0.009582531	0.208983084	0.559989555	0.487871659	2.793630727	1.780999986	6.957034662	8.468957195	0.068322533	0.128232552	0.107466402	0	1.289838468	1.483352618	0.26290586	0.071034201	0.999839493	0	0	0.023763654	0.005689423	0.023836611	0	0	0	0	0.625244419	1.581313529	0.490231138	2.800065709	1.151501466	0.31340332	0.761483999	0	3.212322972	10.07802498	0	0	0.109759199	0	0.02629675	0	0	0.017380855	0.03555214
CG10170	0.240134838	1.864527022	4.050040958	3.387926897	2.369706008	3.989386449	4.812223968	1.322767792	0.965220459	0.898227055	4.388014151	4.125327182	5.109615296	3.60764281	5.696085056	2.329467133	0.574586686	4.670328395	5.613722848	5.992477481	2.360626748	0.044331639	0	0	0	0	0	0	0	0	0.282119842	0.314620894	0.477443006	19.02696273	19.18150234	17.98184927	1.66353031	0.801652626	0.015424577	0.010768013	0.106959315	0	13.68008713	0	1.328271735	0.078037899	0.364940088	2.634050903	0.076043291
CG10182	20.55918952	16.1311915	5.338905938	72.64012889	34.55718711	36.81128353	8.395135177	2.36728822	3.121405444	4.048896023	25.34743386	7.180081882	200.9745123	64.50713077	124.5626331	1.794814172	4.437797366	5.372898744	2.064144411	64.18393158	45.03508662	0.0111278	0.027482464	0	0	0.00446505	0	0.005757254	0	0	0.094218972	0.082302936	0.141948112	19.97956369	13.84223369	12.95243532	0.020623915	0.388683463	0.008567469	0.01525387	0.256820101	0.00773139	92.52044383	0.013637281	12.71450688	2.108173481	0.047658902	0	1.997812614
CG10205	6.623354005	4.377299837	1.304842857	5.847047603	6.183052945	4.189312907	0.486022343	1.022287286	3.077451743	1.118926747	3.363993467	1.936550849	6.262838306	5.656362017	4.092280669	1.678982999	2.283522289	6.094591633	5.275759748	5.855874108	7.690986627	25.18314497	14.96375534	21.33437911	30.24298609	17.37379372	22.94583422	28.74509836	15.26953753	24.48440153	10.58975383	13.13430612	21.07587247	0.367207587	0.226737053	0.108767269	0	0	0	0.005243831	19.19403695	1.22264934	0.052758403	0	0.049107504	0.072073903	0.011478256	0	0.17414603
CG10345	0.113841772	0.426266011	4.190636972	0.522604783	0.525232512	0.58559649	1.21951758	0.815256095	1.130700222	1.615554202	1.63104913	2.849449893	0.695729938	0.985124343	0.695370557	2.291782997	1.342956289	7.390178977	5.281792932	0.472740847	0.284001448	14.37923926	15.2795439	8.925569445	13.04002355	13.86190362	12.39899318	23.61057397	29.00791252	35.48328509	14.59893142	16.36822586	13.04512318	2.086639654	1.893845216	1.869718511	11.30158962	1.028206707	0.015831262	0.027005152	0.405616861	0.014495738	0.108775242	0.044745418	2.174124227	0.507122574	0.105153666	0.994876117	0.68504683
CG10361	6.738134285	6.643611627	1.918838425	3.486281358	11.28640765	5.27025834	0.603437797	0.23994536	0.634509691	0.703197108	6.607107956	0.868930247	7.494356564	9.252465961	7.320227554	0.807981754	0.514826303	1.829449558	2.251800765	7.983921989	9.227321234	12.88088976	9.332286311	9.144033406	19.96724302	8.263372808	10.36681207	9.066764032	9.065337617	11.6972208	6.710758025	8.336604978	6.209008937	0.640594943	0.399798661	0.285833533	2.507543923	0.652143607	0.0223124	0.029481241	1.665266821	3.531842659	0	0	0.925304007	0	0.703048355	0.573668872	0.205817289
CG10467	2.502731417	1.711625188	1.252753556	12.35241902	20.92506066	10.97291395	2.424574626	1.448444751	2.504496922	4.154581896	6.691847631	4.463557463	14.08938868	8.813527781	8.455220886	3.561005651	2.193528016	5.900000173	6.696833394	16.99524827	11.83491604	1.129037049	1.446576816	4.436796499	1.586055215	2.077236214	4.513675231	0.924708394	3.159992853	4.420709961	3.17047782	2.918093786	4.520032887	16.90154488	9.51877074	13.59543409	2.398061722	2.68005983	4.366054087	2.793701499	2.348167226	2.25331064	23.11569174	7.455723316	2.368561363	0.675670471	1.053450729	10.09017092	44.81123948
CG10472	565.6467677	543.7868236	172.0020192	397.7840086	769.5470431	330.1631513	17.21220864	21.81413715	190.6221438	178.929935	382.710038	117.3934391	533.2908646	747.9762347	531.505782	77.45334035	171.2025226	340.7463838	273.8318679	701.2882303	893.6144742	4.284320606	0.547885825	0.499518278	4.638740311	0.666542756	1.008582682	0.881476637	0.897450868	1.256913112	6.386589852	17.67557006	16.65994243	2930.755431	1766.191118	2222.626912	287.4960702	187.7483246	0.037347033	0.009752831	4.047128842	0.222285945	768.0286915	1.409499147	171.8524211	11.83770046	0.571602401	0.976939052	2.147371277
CG10483	3.354458158	2.305974408	3.35530583	2.176743539	3.040431754	3.742162918	2.348428052	2.645199254	1.283817512	0.820788022	2.27776009	2.425326554	3.726896958	4.54762306	5.09477992	2.163537438	1.695604597	3.345826881	5.210397885	4.084982476	4.781108456	5.357260435	5.528172215	3.714918619	4.686226663	5.927121501	5.738036552	8.943718867	9.366417365	9.132694428	2.677541446	2.601479789	1.389565354	0.50505822	1.00025451	0.810964972	3.302039898	1.220108008	0.076692259	0.01047006	3.598110125	3.644046741	0.379441761	0.192016785	0.822329397	0.083542901	5.193693268	0	0.093899626
CG10513	15.27078797	9.962227915	5.56446058	42.20397009	57.51758002	31.8743467	19.68817853	2.771469454	5.171343201	5.017650474	20.74602163	18.13320316	38.95513828	37.16709304	28.43254124	14.35571702	4.561473967	19.7962892	19.37489378	37.43352576	24.51107023	10.04071337	10.6176665	13.10336133	10.98259395	8.496100826	14.45206482	21.32005636	13.39789822	21.96058012	8.678974105	9.464849515	10.67535026	125.1704971	75.20190074	68.71313841	51.05922577	22.49610551	0.092924825	0.070612488	1.09428813	0.121676374	64.18275554	0	1.528295255	1.949631411	0.264185333	0	0.033379359
CG10514	18.2934818	19.14451262	25.41373594	77.81717591	82.40107132	44.79308515	2.816575494	4.271619775	6.95630833	8.58648011	40.1997166	6.897401438	15.4296482	53.93250474	13.57086689	3.045833928	5.788435662	16.4107999	16.40387336	72.89820034	48.20526573	2.938627833	4.21873615	3.774474735	7.861002087	6.805304979	2.963660018	11.1744896	7.512172853	9.465604961	11.81778155	13.55251819	14.37806798	292.0288196	201.4709043	139.8376598	44.29742345	29.81520362	0.848340454	0.361581291	1.334222638	0.184733215	156.9686262	0.097848876	1.036857516	2.156861608	0.030598578	0	4.055372316
CG10550	11.24329608	9.004977629	23.41734124	18.68998666	16.49372104	20.47237506	31.25019432	14.13018614	15.49143622	10.85786818	21.5961743	22.92914542	56.40653221	18.53089832	33.77483068	25.58462176	15.02431577	44.35120003	48.06613216	15.16494151	17.73475343	101.7433608	99.21550319	74.40577556	104.3392261	84.533951	87.77644097	134.9338448	126.1952273	139.1740522	66.31241589	58.11499747	48.00750608	49.15705311	42.74656902	22.9367813	2.119053737	5.95472463	0.501826275	0.362505934	4.684732842	1.666239029	36.32031051	1.378801628	4.127490828	1.074126762	3.768106351	0.585386105	0.092129791
CG10559	2.823014079	3.035481469	2.279841065	12.72646466	11.26223434	9.309302609	2.59507008	1.337250332	1.552244998	0.630741783	7.353918621	2.120831067	15.4970742	11.12333787	21.67530268	0.419102685	1.062306905	3.10473118	4.054341783	16.55459268	10.76864696	0.572006143	0.476152891	1.221248897	1.473338313	1.146632117	1.011857847	0.585742808	0.898645299	3.105470788	1.858329551	1.169319383	1.624688716	12.48970469	9.182769462	13.13832207	1.661723941	6.585167206	1.797494299	1.358876366	9.153815964	1.382259976	6.010608315	4.027558469	2.910110372	2.460106378	0.03027742	0	0.861453521
CG10560	15.64810067	11.83384372	7.287289271	34.27118527	20.53467268	14.13685216	6.45837044	2.652259238	0.948713796	1.722829931	10.80850213	3.568618641	44.55594522	24.32455515	29.40089632	26.17177433	6.125109907	20.50662916	13.4650974	6.174684159	7.880288713	20.62984802	17.66073711	12.98714537	22.78474641	21.7459628	13.95549466	18.53415283	25.85985739	28.83927945	12.75496233	10.91371584	8.612647605	88.89885997	63.63049846	58.24626594	10.18589869	9.962860121	0.065761439	0.19277377	0.227076301	0.023949789	4.325287853	0.122573537	0.258688129	0.53217955	0	0	0
CG10591	0	0	0.316748018	0	0	0.102435592	0.074690102	0	0.017089003	0	0	0.448498654	0	0	0.053220054	2.890520374	0.062299345	0.255207243	2.778375696	0	0.210517769	0.048602528	0	0	0	0	0	0	0	0	0	0.041874422	0	0	0.197089511	0.08445676	0.422338719	0	0	0	0	0.031341151	0.071504994	0.509684911	0.080314169	0	0	0	0
CG10592	27.07076569	4.571067348	17.09490062	14.63129863	53.73314321	21.91820366	1.688212839	0.678674755	10.50236112	11.76622704	24.32872444	9.286318523	50.82985757	40.45462488	25.2657002	5.916157065	6.87607195	18.61645861	32.75147441	44.74392301	38.07262845	0.092237021	0	0.139253928	0.365616956	0.006742755	0.042717036	0.003752597	0.075919979	0.095007497	1.931144938	1.41850055	2.782596406	211.2701569	222.5844412	197.1229935	4.278379517	3.031843693	0.0858117	0.185115919	0.663435505	0	59.5692896	0.275663565	17.96947995	1.195419969	0.012364178	0.101357392	0
CG10621	53.68923719	27.26966391	5.003901516	46.1088201	99.20873429	64.59688745	7.964567773	0.867988041	11.18827373	10.83370847	53.36512155	13.49567403	29.73659929	85.01979372	19.13666982	13.1901607	9.723149004	4.243022812	8.022279861	78.26260753	100.8845372	47.73229733	141.2499839	95.15778097	42.02042855	33.93815982	102.7832836	41.10514459	40.09575296	34.61491809	82.69040324	86.20743373	74.10114341	49.65085698	27.89923773	24.89534349	1.552132041	1.608881492	0.683433309	0.514292114	7.69768962	0.762682893	17.91580679	124.3009969	2.053792176	2.419135767	1.802822911	235.139941	93.20649539
CG10659	0.510785732	0.566814167	3.694683715	2.151707888	1.222421351	2.095580457	0.939771766	2.019348624	4.217809467	0.277764163	2.628779434	1.905509596	0.836919149	1.01859903	4.840338532	6.760835972	2.091499055	3.869279174	7.771699578	3.449381941	3.528785499	0.101865599	0	0.131442285	0.138461408	0.005556992	0.020291506	0.028448002	0.055385163	0	3.478447877	2.197954464	2.337536376	151.5562819	97.07954727	82.37054362	0.724585991	0.897673803	0.061376164	0.005427929	0.026045607	0	1.230086563	0	0.18381335	0	0	1.201509807	0
CG10660	7.307374475	1.820837209	4.81656277	4.716484045	5.693406442	5.989731105	6.300331528	1.866249905	2.174142475	1.943682744	4.931680747	5.818294529	8.429697322	6.12294676	6.097673097	3.540265779	2.363732208	4.278707789	7.344002556	8.272584414	9.24749815	1.482037738	2.583769355	2.042731164	2.451911501	1.685451011	2.315592615	2.637715915	3.741415426	3.343624387	2.00127917	1.964625487	3.620306373	16.69244793	13.37931069	13.7763295	21.32584184	7.019157556	0.433430261	0.490860209	1.314570439	1.526302398	8.514876774	8.269748526	6.680560344	1.246155276	4.063449703	15.58141565	6.328127664
CG10725	173.4982611	122.8278852	19.5560239	266.223486	276.0710366	285.9513157	3.858579242	5.48718696	25.34798367	24.96354638	212.8291298	5.949676112	442.554382	639.0947453	484.629005	2.238961668	32.32793662	2.070796152	2.320406949	452.5342906	509.4427443	0	0.120291978	0	0.025374149	0	0.020268552	0	0.036374843	0	0.525595672	0.919507837	0.571992938	3.857176316	2.294824456	0.47222819	0	0.221527353	0.020659162	0	6.855253794	7.6698069	255.8384834	0	38.96604014	11.01667918	0.047471159	0	2.235454164
CG1077	0	0	3.035084622	0.149877696	0.177745831	0.388141861	0.870882208	0.762427505	8.692099073	5.446039787	9.113206125	12.05025653	0.11583489	0.109725589	0.167324336	0.017091047	5.425243216	1.535935588	0.305188477	0.14450503	0.195299949	0.048458814	0.052168548	0	0.037824623	0.093561473	0.007776847	0.04295013	0.11650154	0.025985512	1.259433968	2.726124504	1.990691261	0.974019697	1.64231102	0.635380287	0.715736228	2.197475008	4.15562498	20.87285514	0.020865016	0.065243032	2.040346025	0	0.960452324	0	0.062924548	0	0.381052224
CG10799	32.14193562	13.29725712	35.88240682	33.13282368	43.47518981	26.08239879	22.63648298	27.99742471	11.81660449	7.726626092	27.62219456	22.39572456	116.8985904	38.27725915	111.0756262	23.91702571	10.52419327	33.40429254	59.03495074	57.60357537	18.59760187	40.50794516	68.07874226	61.00078691	44.31666145	43.08111007	64.85786549	53.24540893	94.51703512	197.2860534	37.04481576	37.75384024	57.08344025	82.07648092	50.36500686	25.63463027	10.33964019	4.330828333	0.305131266	0.131138954	3.833519226	0.451034113	17.92006822	213.909261	2.168295286	4.797286161	0.526610844	63.55703296	165.6636115
CG10814	1.550455343	0.108578943	0.020784684	0.763120448	4.635210926	3.353946284	10.72996512	0.017985653	2.360423258	0.430900599	3.952768116	7.266931847	9.983535143	18.88681868	2.409389515	2.325187674	0.631553797	0.455823501	7.231657583	7.1814384	17.87296875	0.030766869	0.078058706	1.848175264	0.01535301	0.325179613	2.970322482	0	0	0	0.12294612	0.245598543	2.136117702	0	0.031544342	0.028351952	0	0	0.025000273	0.048785775	0.016559197	0.401306975	0	0.011908119	0.078975972	0	0.156764918	18.39538316	0.082340321
CG10910	181.9560004	348.2634956	69.83348003	255.9222248	341.5668876	239.0831179	3.210794028	28.5503128	120.6663805	148.8564576	187.363898	8.988172106	502.1332136	406.3804553	279.7559917	3.737245464	100.706577	16.34229706	21.50168124	466.3673281	500.5985381	0.135636342	0	2.670648032	1.216354662	0.018587245	0.112010703	0.030047961	0.085147542	0.014440063	13.14633013	8.926172692	33.51364425	304.2308754	253.6744342	441.8197345	2.217450729	3.015282984	0.199122824	0.009123165	6.705418553	1.469194671	1073.282775	1.125834757	178.6354732	15.03561054	0.233140479	3.133325253	2.200323903
CG10911	91.25327697	220.1042906	2096.895853	103.3370231	77.29299766	190.058928	149.8350257	393.1216106	415.315742	327.1262951	184.8108426	208.9724067	231.9335305	182.5352208	126.6082881	727.4419615	397.3084823	724.4670211	1898.529597	195.7202421	101.3363415	17.48829735	0.087520682	5.854463277	8.746528925	0.417146997	1.611780107	0.554780298	0.256079112	0.199669353	103.8055203	80.3661293	174.9362153	7215.01776	5717.967381	7473.873588	59.15649933	210.0770626	1.37795639	1.245590591	4.034024901	2.426997521	1296.75164	0.114661434	71.95158066	18.33780515	0.284265746	4.742961907	19.75832778
CG10912	896.8888678	735.4680413	473.8989714	607.5625228	366.0939944	469.1747742	33.70727187	144.316537	688.3772202	982.8458038	382.3920082	38.45863012	615.4321873	647.8490426	518.9015796	148.5281069	787.1723247	101.4129939	392.4952881	852.9946668	705.3379041	6.005472072	0.007836601	4.572604782	2.778354344	0.148198874	0.482418909	0.380821676	0.074111058	0.095132538	29.29721835	17.04428222	59.25662569	1077.557024	1264.910395	1282.17678	8.032578383	27.2023259	0.585128412	0.782381314	25.61824714	9.608657677	4891.941536	1.415239147	148.5582177	52.7555643	0.992466394	2.459547278	108.6009036
CG10924	8.607136569	6.094073586	3.565842566	30.80230825	21.71570106	17.28724119	3.263158115	2.132731256	7.100885131	5.021670347	14.82298368	5.46858107	31.85509085	21.48690419	29.77357849	1.986544165	2.939675716	3.727666457	5.084065864	26.00454717	26.13069679	0.095707392	0.098727402	0.52106964	0.374124925	0.166493391	0.046217772	0.612586072	0.263268714	0.161034711	5.165408303	3.226821681	3.488396534	3.023218115	2.714100877	2.946387286	0.081895484	0.461149152	0.100810714	0.027553543	5.406366883	2.741901888	8.932388959	98.53695534	1.671703332	3.362998444	1.035363979	28.46165957	225.2640399
CG10943	2.113958658	0.522423613	7.533358092	7.489938779	2.974861316	1.181322599	2.352096097	4.411363389	0.689414636	0.911434761	1.439463902	0.42048136	7.129487754	3.121034836	4.837790077	2.351172008	0.798590175	1.334551454	1.103919059	8.383232025	3.303768526	0.01590753	0	0	0	0.008324864	0	0.010734113	0	0	0.198000467	0.134190342	0.335375704	28.80310138	24.27491088	19.59103523	0.046126166	0.963488026	0.031138447	0	0.078934732	0	17.66631086	0	2.108176222	0.192061952	0.017887683	0	0.057688239
CG10947	2.194490225	2.763027716	12.88086935	4.783461418	4.440040371	4.644734496	5.734188052	8.154601928	4.136728297	4.666858507	7.369266524	9.467309864	4.027178269	3.457354284	2.572768904	5.131031186	5.940782196	15.29152055	12.74480637	4.332640551	3.279968477	14.12901929	12.92595288	7.37914865	22.81249892	17.48517373	8.820489402	27.08567172	25.09834198	17.31704658	24.73232005	21.62727239	10.70016347	4.838711033	4.349374428	3.228224283	120.534019	7.592579663	0.06116774	0.021615927	5.867951205	7.303437209	3.693739116	0	7.938958566	1.349895201	11.22722758	5.341415288	2.975586357
CG11044	0.952600562	0.276407384	0.693613781	0.201933393	0.581042016	1.293118883	3.289814918	2.113733385	0.086638836	0.26697346	0.88101718	3.381906579	0.704012846	0.397711492	0.800245023	1.089360361	0.181949252	2.82602857	3.331837258	0.64722026	0.632461217	0.244570715	0.545125847	0.767952922	0.559921053	0.794755173	1.256363844	0.99645132	0.605854072	1.473645647	1.329115733	1.308473585	1.076312807	0.033802895	0.030351268	0	0.11695347	0	0	0.002518582	0	0.035310047	0	0	0.111461177	0	0.41411492	2.682068957	0
CG11099	0.347187867	0.168177364	9.682657728	0.073327848	0.002720033	2.634687131	6.405275948	5.901343593	1.818923606	0.901776061	1.79029941	4.332879476	0.387731604	0.247995718	0.349715354	3.846596125	2.055096469	7.959009644	8.917795971	0.093232583	0.328398086	23.00080792	23.1114989	15.63872675	29.26082244	25.92479284	17.4159728	37.24538179	42.29911694	41.20799495	10.96181742	6.737668145	4.161927455	0.770525051	0.590373935	0.417029037	0.010388789	0.199751683	0.004190615	0.030532634	0.246180449	0	0.131630145	0	0.028306934	0	0.019258607	0	0
CG11160	2.455055079	2.613788047	1.322846656	0.550512381	3.104229232	2.148790462	1.488198691	2.358881815	1.055526612	1.063481549	1.809903548	2.203485704	1.888501467	2.155507888	0.80662716	1.073543719	1.10424857	2.165937559	4.254129661	1.580268338	3.258027579	0.642609676	1.06375354	0.415958585	1.155972788	1.378323702	0.880539523	1.339559277	1.013482532	0.472738816	4.496908004	2.751302898	1.492011519	0.284268242	0.353979547	0.360221558	0.275247507	0.736972611	0.007417831	0.002833367	0.795769237	1.177071463	0.023350799	0	0.294788396	0	1.401388303	3.419857852	0
CG11192	0.277355508	0.282116185	0	0.064898535	0.321297746	0.233563228	0	0.191803209	1.284736973	0.316368014	0.143669234	0.419687287	0.092760434	0.405714223	0.280111625	0	0.553958816	0.097802106	0	0.676706502	0.166675839	0	0	0.274087357	0	0	0	0.010581921	0	0	0	0	0	0.033320752	0.048292176	0.052168313	0	0.019321571	0.019167141	0	0	0.03526288	0.915538305	0.036518736	0.160209895	0	0	0.496084796	29.76326728
CG11211	0	0	18.69638921	0	0	4.808909691	7.844696923	2.491142703	3.119501643	1.536803001	4.82720229	12.64536732	0.096588744	0.169822233	0	8.69801171	2.86826077	14.23647774	8.936729403	0	0	38.66531233	30.73761342	61.39362266	48.785613	93.33047707	77.94277952	110.9040478	119.1735008	232.5012512	0	0.224344794	0.110303215	0	0	0.097137491	0.006583869	0	0	0.114859524	0.760205192	0	0	0	0.008581366	0	0.106807784	0	0
CG11221	2.513841254	2.375071483	1.6623048	4.505231624	2.025871513	2.756485582	1.307437222	0.36179561	1.952161837	1.07453477	1.565561902	1.542719946	2.509175863	2.826046319	2.894340312	0.99349266	0.488903677	0.602045884	1.424822914	2.247246624	3.047715662	3.505889608	3.63577463	4.319951888	4.493607943	3.828974499	5.614012779	8.321473168	6.889992829	7.00822145	1.301686697	1.51029915	1.64780376	0.377337976	0.786109667	0.66841646	0.06357697	0.311954575	0.06712256	0.013637421	6.617228644	1.903367189	0.91735672	0	0.302369486	0.121319204	4.108370973	2.422694806	0.041492904
CG1124	1.750176192	1.30777171	6.965611112	9.448364748	12.95091556	11.21156983	2.513044785	1.71928851	2.283768315	2.980133774	7.558067223	4.15701575	26.14186177	22.54861824	7.350714603	6.045948448	1.825344157	12.99753378	12.75799723	9.822307823	5.099459328	11.87403917	12.00031768	27.24457252	20.13296137	21.99847058	34.98518042	22.81774572	20.26695693	44.20929799	14.26509669	15.86091323	15.64892229	23.10411234	16.24952769	18.5812953	1.349462259	2.303878705	0.584398693	1.69509023	13.04791216	5.999561731	1.881688381	0	0.943445823	0.299145669	10.64668094	2.48299621	0.396525159
CG11319	0.485698379	0.619548156	5.454012279	0.402650328	0.196421074	0.836635037	1.866616244	2.263591502	2.504765067	2.136565008	0.824728251	1.383899438	0.287831744	0.275821308	0.309952113	1.047941016	3.484767292	1.868331202	3.245651923	0.146050604	0.237626861	22.71198931	15.21922683	8.456174348	20.25164202	18.5229828	7.198994482	32.35646808	27.30541827	20.72167533	2.235779772	2.47531965	1.346391273	0.374915309	0.959582998	0.43242021	0.779553516	2.154409303	0.0320747	0.048123132	2.06838285	6.583798924	0.832358036	0.009001558	0.556105857	0	30.90379975	1.275296945	0.573137534
CG11321	1.143612662	1.373928517	9.842308447	0.522808167	1.630617676	3.671879198	5.036509601	3.745632892	2.678596078	2.310693328	3.952929371	4.910517081	1.939693035	1.405386194	2.930546265	4.063885004	2.323020626	6.98700938	9.940351295	1.26636596	2.462708058	14.85488338	8.833683967	6.92729883	14.44258223	10.55301834	7.251171489	17.92200938	9.471353116	9.040339973	27.10617153	18.61200206	15.35937081	0.487490087	0.667564872	0.503421589	0.055604594	1.224763102	0.046382056	0.027832746	0.990968561	0.043338952	0.045721412	0.238519444	0.056731217	0.002380626	9.383095152	7.150498184	0.023100319
CG1136	1.209413049	0.923665501	4.893909481	1.81479192	1.298937058	2.008560349	1.410176704	1.699114149	1.03770959	0.49859146	1.911883084	2.291221385	2.520467	1.209066156	2.589699333	2.309931687	0.893623562	2.822456913	6.505300697	1.938046451	1.781937257	8.671530118	4.102814804	4.829026788	15.94631236	5.34008235	4.451086188	11.33949211	5.854697533	5.67200482	14.67170657	7.555997215	6.616042541	2.826946181	3.030895282	1.700522965	0.213401115	0.489985024	0.406520622	0.08516391	7.825408112	0.443147184	0.243810856	0.104262677	0.260141837	0.025525301	2.889347223	14.77191619	0.00858963
CG11368	5.508693189	8.243878802	258.8898805	33.68207716	28.3344314	29.74352076	26.96121373	103.8053266	18.24228408	16.03121993	42.66708789	28.9853935	41.56710823	33.73767874	39.39423687	67.44194073	50.06955455	81.75753296	75.68756977	35.55511994	47.59158084	406.2191575	706.0115387	675.7176791	418.6072369	688.3190412	671.2242578	664.5987292	2035.21433	2016.951611	58.16337112	100.5057748	69.68052538	1.985196973	1.386659646	0.617242358	2.210503264	4.048257115	0.142368512	0.799922435	67.27857576	8.084286505	0.050230396	0	0.896724064	0.059782891	8.642902484	0	0.787631169
CG11381	0.067793459	0.0378663	9.997370051	0	0.037361932	0.023743265	0.002236729	4.186183618	52.92828097	43.80562337	53.03088941	48.53373205	0.076069065	0	0	0.006326449	33.03961645	13.43848889	0.093463184	0.166438792	0.034164801	0.062407947	0	0.093618283	0.038046098	0.370417749	0	0.174276297	0.020626138	0	5.882422295	14.3790463	10.9120526	4.081535398	6.483401329	3.377263878	0	0.035316492	25.67948156	126.5374014	0.23994879	0.106447502	0	0	0.003254813	0	0.303312809	1.832112132	0
CG1139	1.087631451	0.648963995	4.435135137	11.04120332	5.025401152	1.642348424	0.653469844	0.196651222	1.18693801	0.958922556	2.563263851	0.644582716	4.198986576	4.379703245	7.550614503	7.903504434	2.260835408	1.045900068	10.1809109	7.982275182	4.916007539	0.233854899	0.042561732	0.018727572	0	0.012267059	0	0.038055233	0.004911189	0.068208762	0.424390265	0.264603689	0.687239841	14.90222645	7.041665948	13.45448248	1.153467583	1.188439108	0	0	30.43201381	0.502041226	3.493765434	0	0.142143043	0	0	0	0.048233173
CG11425	1.667695992	0.932125483	0.432525744	7.479925464	8.759006584	3.018348455	1.714774532	0	1.446901734	0.681565672	4.336635409	4.672179924	3.802042878	9.272996128	0.402586765	0.845916925	0.238294173	0.539999342	0.568855015	5.907367159	11.83543943	7.5569773	15.52453435	16.21200241	19.90355902	2.910896236	14.04968549	2.593345121	3.090582338	2.209468729	9.860434205	8.902142184	6.770604205	0.40050511	0.861549293	0.88980794	0.038063407	0.126505284	0.018041149	0	2.241538399	9.428393841	0.157533203	1.997160729	0.38933319	0.122553632	5.910170026	3.064942549	0.937225762
CG11426	2.002351951	2.232369439	2.857107873	3.045904844	5.295843973	3.123197118	3.268668379	0.499449549	1.938428939	2.181714698	4.167036094	5.427874175	6.719722397	3.88955511	8.773675332	5.05080022	1.343486035	4.417977169	7.739524755	4.504093227	4.934202917	2.558817009	5.170358474	6.318179117	3.095338298	7.76809253	7.917231341	4.918642058	6.883945432	11.17420761	1.202729941	1.519506467	1.418557572	10.82081725	8.233346189	14.36491478	3.191672116	1.160926599	0.39432879	0.230552546	2.15989787	10.77284219	4.767625381	0	2.025090591	0.116255698	6.955774025	1.170936798	0.507805033
CG11504	7.25491828	7.399857936	10.23905684	3.612151551	5.576112169	18.2444973	33.72006511	19.31595759	16.51650631	10.36095273	13.1851042	30.6690056	3.604649629	5.631366251	3.865489325	36.68406712	15.68345866	24.81715825	22.88687978	4.531582529	5.522973499	7.52767118	6.808928137	7.271033444	7.085880928	7.960621419	6.427983181	10.20430925	11.0756071	10.98082093	5.239986784	6.581869764	6.596539654	4.491151979	4.449493534	4.520927547	30.72290549	8.717361987	41.05042368	48.64500316	10.8498634	31.51133417	5.266502364	4.604825062	23.97306443	1.448586888	17.1673668	7.004315949	6.781002229
CG11537	2.846917834	2.031667441	5.240972644	2.911800336	3.315020869	6.458410088	7.343945436	5.606017633	2.884071072	2.880451373	4.734346366	7.453392318	3.924759217	3.897217118	2.802635681	4.113115058	2.921387751	6.372220196	7.663158047	3.976794472	4.317540623	9.614038558	9.364132014	6.733706813	10.24868297	10.40192521	7.748871656	15.33999201	14.46231318	13.34442955	4.85986427	4.018555878	3.730899598	4.92861523	4.1506697	4.566220123	24.46708547	6.050037507	7.512213503	6.361998472	4.459799179	5.540597548	5.026696875	0.943648084	6.157979676	1.130666348	4.581158896	4.407598292	2.210634618
CG11550	1.548786684	0.487907386	2.670843348	5.047481127	2.249243219	1.285555784	0.081975102	0.53208801	0.589475274	0.601859376	2.102813678	0.8334578	4.326527129	2.748160135	4.72791559	0.250559347	0.363378194	2.033863862	1.253944123	3.304641978	2.427150754	7.79641486	5.393675988	7.185478758	10.67057509	8.264018893	9.180816168	13.49718269	8.573145774	13.14289894	0.90688044	1.49802139	1.144389554	3.551663118	4.565484075	3.782452812	1.037112763	0.603480223	0.003874141	0	3.759653181	0.494430403	0.084916933	0.190763877	2.214757978	0.009316299	4.068607019	16.17411548	0.459171528
CG11619	0	0.125279062	0.164892177	0.465326934	0.402064985	0.95150436	0.793647841	0.095493651	0.333800703	0	1.239222023	2.301522015	0.04522681	0.367302667	0.156272382	0.67235301	0.524936171	0.812396243	0.490555163	0.607981025	0.396646006	0.348378032	1.45504926	1.35566253	0.654853378	0.969266559	0.929795526	0.632239414	0.948887168	0.964639343	1.110564682	0.883997153	0.822465265	0.01875605	0.251363096	0.13578295	0.150302904	0.403882983	0.067140385	0.006670334	0.205446986	0.144901856	0.307446195	0.896428029	0.388920499	0.157867236	0.356137334	1.482764101	2.108301115
CG11671	1.289962618	3.297452864	7.377848769	2.413810028	3.120841476	2.788527264	3.943196179	4.499941822	1.164576015	0.500509763	1.824287151	2.500609939	5.356766674	4.019982492	2.786601386	4.565159329	1.609717384	4.333977311	7.098974168	5.681446198	6.69884949	0	0.075552451	0.146038521	0.039872125	0.588939952	0.154185541	0.070360472	0.034884178	0.179539551	0.222501831	0.392486513	0.962874819	25.93674455	25.64880289	42.14373373	0.477034699	0.302680996	0.22970239	0.026922368	0.017330219	0	8.03608584	0	1.128863689	0	0.030060533	0	0.104161054
CG11672	5.749063471	3.731522929	4.269119418	17.57497449	19.06543575	18.74071281	2.255164644	1.369291595	3.449382856	3.030621236	12.10868499	4.068667044	20.15322367	19.90306704	19.72633101	6.118473199	2.917013739	4.728215428	8.268215434	17.00806568	14.43728797	0	0.067270275	0.103934273	0.241937905	0	0	0	0	0	3.049836332	2.559226272	3.916913721	25.67078307	14.57113045	14.62364336	0	0	0	0.016972008	1.261280357	0.535107926	26.25332048	0.030956871	1.990372116	1.219480597	0	0	0
CG11796	7.352890616	8.528305362	16.53890618	6.674502928	37.09334299	47.7256388	21.87867745	18.98605441	4.248211985	1.560110811	24.55608317	23.76381616	69.11895178	37.59802623	70.83733164	42.68300499	7.091889129	30.98259679	67.65754252	47.21595664	83.31838197	48.43766028	30.43081853	46.6183293	106.5149627	37.71235167	58.0956387	77.16647297	50.99274241	140.3178156	71.56144589	47.51422735	57.45775548	0.533721829	0.598699351	0.949349499	0.106300104	0.235020501	0.012153046	0.106678739	3.714671871	0.022073826	0.012590387	0	0.041592588	0	0.020721851	0	0
CG11841	0	1.70714705	6.033267174	0.157409348	0.545628099	1.798637537	3.180096652	2.821023124	4.339518892	4.373836714	2.007754517	9.047231409	0.178510209	0.213696812	0.113516323	7.623720684	5.266838279	6.710337639	10.25490158	0.009890161	0.398083922	13.97215045	19.51595889	29.02924695	13.03525974	17.39741909	42.0997704	29.09995069	37.43972823	71.05266981	23.34358041	21.68589365	44.64850391	3.440141401	2.228383951	2.377187975	1.666460455	1.381299224	0.057955398	0.021519372	0.71391528	0	0	0	0.009301831	0	0.018831078	0	0
CG11842	0.070298814	0	10.76700584	0.553698437	1.33068446	4.529393418	7.102923485	5.4879064	4.257359713	5.280574712	3.650191404	14.1385834	1.476757325	0.82318308	2.415870796	17.88094405	6.893924871	7.121829496	7.867970001	0.7895174	0.454802818	18.60539398	25.04027996	37.99159188	22.72969882	16.59696679	60.35186607	18.05140341	23.60316884	54.9076646	28.47718547	20.70061046	47.20856811	6.76966811	4.9197987	3.645556264	5.107272142	0.771740172	0.064581223	0.034802419	1.006996758	0.175442915	0.502969992	0.60337573	0.263234253	0.076279469	0.267256459	0	0.110488887
CG11852	19.34709266	25.3063532	5.942872594	39.97201673	57.26022521	26.98240539	1.899012178	1.008649416	4.300370504	3.036094195	15.03280998	3.719334963	78.34091676	48.68693049	50.6028064	7.080188848	3.742965599	9.646371994	11.68501027	34.43631526	59.37118082	1.590884739	1.656171703	1.718803804	8.714708752	1.909242992	2.935192291	4.921089203	2.844002507	4.701846651	7.277114107	5.145584933	5.952570722	13.12625169	7.521984487	6.10756711	6.558823749	4.78258792	0.795217263	0.536231026	21.92725355	3.082361285	25.97421304	0.84281731	2.557810746	4.133027453	3.337185823	39.51200917	0.041220359
CG11873	2.775056795	3.827047241	11.07555009	2.158612755	1.425582896	9.578362096	20.92622881	13.00827697	15.12213011	11.59943672	8.358130122	20.0215657	1.496054531	1.549633662	2.289113507	14.26768538	11.81957892	12.81224659	15.41690034	0.826821061	0.94045176	11.5834044	10.89372275	9.40312514	11.33310934	12.44847815	7.740874834	17.70403568	18.76945226	16.52160036	4.803132071	5.670638878	5.03627386	1.312683488	3.53208617	2.712615088	2.406344078	5.443880151	21.63505571	27.54311402	19.83176405	55.15154028	2.674270785	3.895007399	23.52029439	1.854945076	33.9821513	8.438213613	9.029053355
CG11878	0	0.615856587	25.99771294	0.627363015	0.136247935	4.982531369	13.16377278	18.32441728	18.35228576	4.305509873	5.275102919	17.28184219	1.535528432	0.772201233	2.008407483	40.55248055	14.05020792	38.70975952	91.18273684	1.08636043	3.43263733	0.160592643	0.370657293	0.536439868	0.370982463	0.486315924	0.793331356	0.240468754	0.343000089	0.571619627	5.517571433	6.915840455	11.32609586	190.3210515	132.9887957	240.0745091	18.89619459	10.72695409	0.250297298	0.153822567	0.069972483	0	4.102271203	0	0.05116017	0	0	0	0.015694091
CG11883	1.945375765	2.646851121	6.717478077	2.650239262	2.474520278	9.913502395	16.77140653	12.97821559	4.413890004	5.81294483	9.179845061	17.19590879	3.914967789	2.69996353	3.48335887	14.75725602	6.057340942	15.10613067	12.45775384	2.705138623	3.400545384	8.329593689	9.27007936	7.389061024	12.08356114	7.982777877	7.788791923	14.21091447	13.40639702	14.19007199	7.905545547	6.344718586	4.352148927	0.826740561	1.754339734	1.291656104	2.605358731	4.439935011	22.85452973	20.51817832	4.481334454	6.375711914	2.330961933	3.054244934	3.288072521	0.913221555	11.82333708	2.3536598	20.38410645
CG11892	5.473192285	9.713597466	5.566701859	53.6658574	41.85260827	20.45214922	0.238509762	0.410050077	4.809328368	5.924463934	18.17000077	5.743311315	9.994019059	20.41739518	3.746830642	1.668884876	2.104862517	13.86495963	6.961971313	26.3330976	15.46098259	0.278767259	0.523218366	1.109362385	0.90909051	0.714190178	0.708333182	1.505061863	1.243165301	1.182806953	8.66060944	8.673005124	9.356189407	158.8950779	109.0880182	82.69251958	21.52011142	14.58541388	0.967321471	1.041341153	1.40612429	0.1658111	139.3488537	0.068540098	1.273459714	2.681548775	0.165144143	0	4.386832352
CG11893	0.630759556	1.269422816	3.537145376	2.558236077	6.146054686	12.4791396	21.71119997	5.083171877	0.56944077	0.154579258	7.842824703	4.833689196	10.06176273	7.439819634	26.43230673	10.90362175	0.3194489	1.579290548	15.07179683	21.79583531	18.46367364	0.963222763	1.887150146	2.807211509	3.96659354	1.482249416	4.852301981	2.123981318	3.040253822	8.219181665	1.917314538	2.057633185	2.81124492	10.59772305	5.036623029	3.232324069	0.116033163	0.796599758	0.129959544	0.114922599	0.49571903	0.009946206	1.081421677	2.403788495	0.320248443	0.679640391	0	0	0.102724976
CG11898	0.431186106	0.531305354	0.595620817	0.291532911	0.986608132	0.595407272	0.648316295	0.047291781	0.754932133	0.546842504	0.543148705	0.578876745	1.070490423	0.311055021	0.363275268	0.354198576	0.36691985	1.047717154	0.929054551	0.590634025	1.552956363	0.028119073	0.012237393	0.006061929	0.007941293	0	0.005614891	0.010201719	0.009914726	0.002044785	0.069255855	0.045584811	0.063279859	5.974826983	3.67076502	4.578098419	0.17709422	0.143108754	0.003694659	0.001929652	0.002326347	0	0.955349776	0	0.337010043	0.450263491	0.012734525	0	0.077919497
CG11911	335.9067379	277.8209806	50.04440625	469.601682	752.8124897	424.7857316	5.225101669	6.586881231	43.62932749	42.26588889	409.4891656	46.52095718	607.9446734	857.1578683	734.2277911	17.40100137	50.6274724	90.60376572	118.5201855	886.5897152	1151.007077	0.085024109	0	0.148730792	2.501153844	0.009984729	0.376946252	0.089736141	0.107410777	0.071950688	1.680011392	4.317344984	3.507183713	912.0322763	568.7884163	395.0804331	24.94550873	26.31528493	0.037347033	0	0.834651609	0.034577814	258.5549441	0	34.70891608	10.5994613	0.042769178	0	0.21148793
CG12057	75.33517363	119.667604	17.4183802	147.3391232	109.2504368	17.66654242	1.119194179	7.173224711	123.4237306	155.0016804	38.29754031	18.38681675	22.09228516	36.19137875	32.09421352	0.707847252	75.97382466	12.58379945	4.600949259	48.93201521	26.37490743	0.758841338	1.129530796	0.880810279	1.041343706	0.834956247	1.485459209	1.695765893	1.863549999	3.161432779	1.315410619	2.429170725	2.798102608	222.8173028	159.9398967	77.94782268	11.83509674	11.54158656	1.383618124	0.717426535	4.990849113	1.179482193	743.7653609	0.671982556	47.35490576	6.601328362	1.236753423	0.80280305	2.130383743
CG12071	2.515352598	11.81685038	6.04070332	1.425920333	1.244909893	1.306354543	3.357452107	4.921790609	17.39969615	19.16257297	2.298421739	2.988788889	1.121306615	1.286373549	1.010345816	2.188613344	12.05318353	4.062779132	4.57827106	0.77074881	0.867004845	27.79388797	19.85295912	13.49664584	24.79689233	28.05133305	12.81482697	34.11524643	36.76727893	29.9861907	1.21408878	1.584800798	1.103430872	0.067745909	0.237062714	0.016735429	0.019869381	1.081925816	0.031201247	0.024082377	7.554704135	75.05487372	0.091272928	1.372434872	4.095897735	0	47.2072386	9.27551103	3.255637796
CG1208	0.633561104	0.084578612	4.930030019	1.836652515	12.71696559	8.134453317	1.912805259	2.761133515	0.81280649	0.721412462	4.832672082	3.036818901	17.00421994	7.261315253	17.4589855	9.533300224	1.621022219	4.84652952	13.47980418	15.38812942	15.54415962	7.36838289	3.629664655	3.390682084	6.852443276	4.35011846	4.410600072	6.587583955	4.025902516	5.539444222	7.480433051	4.745047647	3.879485895	21.30690532	14.10159831	17.99590873	2.022717356	1.611142412	0.029075822	0.007550962	0.302159635	0	2.127955696	0	2.46199085	0.117150773	0.127820655	1.281231587	0.457571011
CG12081	7.81158054	4.302584832	11.51007338	13.35873468	13.00563609	12.94478946	19.07843652	11.08756606	8.838356095	5.207951908	10.07216609	19.58250595	14.88498873	9.653285863	18.42579297	20.17012994	7.521413641	14.44548022	18.39412673	11.10173211	9.843642552	7.07897637	5.261784318	5.763192792	7.767705618	6.962835273	8.778848548	7.97267242	8.660331512	7.807605191	5.183057372	5.49141906	5.589987484	4.489625758	3.888692975	5.007165697	16.25121286	11.28535185	26.64502872	21.94680123	14.52236797	19.79052649	6.940719993	5.180562936	17.37322198	8.251664555	16.06241219	16.49960886	6.09584731
CG12112	1.495864642	1.746414563	8.615321289	8.947185541	4.668710743	10.65201846	34.07567574	17.64929504	3.502043865	2.743653731	8.234283967	17.62676296	9.74496816	4.532381564	5.872251852	23.01373135	6.961986036	19.89910606	13.60315577	8.475906979	2.791408586	2.276704809	2.116235409	2.041197278	3.454293487	2.763709143	1.556692649	1.189470944	2.579904372	4.862094599	3.028678383	4.72460717	4.644960522	9.924478359	9.910246075	10.75649246	4.093140633	15.33074	56.26812752	34.65064647	6.189900292	4.977470161	20.47944601	0.775397705	7.39531984	6.880844087	4.307843475	1.126148478	4.017966976
CG12158	0.091181228	0.13544601	73.32375206	0.38350813	2.096608925	13.121955	13.84780772	10.37245457	39.66493863	34.29543203	26.0705665	35.84514497	0.571213559	1.256536152	0.464712304	58.62558033	39.08579089	58.69921115	104.5941734	0	1.221574248	248.2273081	230.1069976	206.3848468	196.3034253	389.1831336	186.1171827	468.8601626	757.2145504	1381.686672	27.52827639	51.50192379	31.04710639	2.110557972	1.24713282	0.33411494	0.472546466	1.208599424	0.093177037	0.261804444	3.012694233	0	0	0	0	0	0.283619099	0	0
CG12224	1.08318905	0.970520419	1.768895171	3.66135518	1.554394661	7.625757108	27.13308095	3.365613192	1.677306273	0.884949387	9.512803757	26.69040065	5.394667279	4.113587124	4.486697418	4.181606769	1.577411243	3.149444458	15.01482661	5.170174069	7.085289477	0.732586546	1.593298846	2.570398313	1.305175519	1.072910395	3.474381537	1.654541768	2.437190508	3.038149611	1.845750164	2.126972015	3.550609883	5.621672672	5.058873389	7.93833712	0.222930794	1.142353314	0.414619104	0.412793262	1.151018806	0.428096473	2.206854393	6.293791977	1.557279371	0.160994104	0.460649322	1.806982873	12.65935637
CG12239	8.892136906	13.54940524	37.83122141	3.385397174	3.035115503	11.73508995	22.19177813	15.46527446	31.19118946	29.1069408	13.65721125	21.82277619	4.701906205	5.139437225	4.949731225	15.30113862	28.39717165	25.87520578	35.97504131	3.007611997	5.020791678	125.4858911	193.2411549	108.4590845	98.11334019	156.4277246	129.378975	222.1861446	404.911391	637.1485811	18.33487682	34.97518184	46.32592695	0.082205489	0.349643557	0.307629786	0.981944073	2.606875511	0.154848351	0.158470297	17.13658708	92.1512978	0.131125078	0.014741824	2.517903928	0.20989892	53.97283912	3.248834983	1.419530178
CG12256	0	0	0	0	0	0	0.15358419	0	0	0	0	0.058595426	0.010347532	0.053260184	0.119884005	0	0	0.296778625	0.068545889	0	0	0.179135556	0.14176645	2.769865417	0.231684381	0.142450937	2.741139491	0.115476416	0.884888153	22.75821186	0.074926123	0.140265064	1.14131888	0	0	0	0.236042883	0	0	0	0.075760917	0.035299689	0	0	0.131962601	0	0.109510711	0	0
CG12290	1.272999915	0.885661162	2.690361045	0.790592572	1.146450268	1.851946623	3.145489597	0.917789047	0.985238414	1.141116795	1.721473332	2.786935382	1.21184913	1.189267771	1.399239983	1.776087397	1.119784598	2.451952391	4.162176406	0.871972447	0.863147276	3.842470687	3.842002031	3.31827997	3.883359782	3.923256266	4.217103274	5.233731761	5.383398265	5.200064413	4.789670706	5.22435111	5.591217557	3.431093965	4.579851511	4.363718642	0.797726998	1.562584129	0.490516996	0.609675139	1.025135498	3.076533564	2.385397289	0.488157359	0.859538415	0.017225368	2.676910033	1.266372179	0.582100794
CG12374	0.222673572	0.551542784	86.53238333	0.465902573	2.252686094	5.391441982	9.123714045	21.24287832	256.080147	182.1751247	747.6334935	574.2837169	0.521454227	4.286552429	0.38690047	62.16593909	218.9987933	780.387913	666.2309792	1.055699922	1.419964828	1.229863361	0.040532289	7.767097978	8.422217137	0.202155006	2.607481974	0.6542553	0.016168237	0.329127119	152.0951004	100.7932476	112.7675034	8488.470199	6688.284872	5564.550541	21.63720257	20.2445554	0.883925466	1.257724027	1.021421501	0.090342035	1.634215934	0	1.408336862	0.278763867	0.091258989	5.71044472	0.549549696
CG12531	0.676169383	1.061801383	6.962881386	0.779352183	0.350141585	1.788149965	2.935499826	3.07734248	3.562230936	2.859708671	1.057269456	2.11736335	0.363547866	0.523185996	0.561377771	2.796650626	2.978754983	3.72037946	4.470201665	0.255565086	0.518593238	27.66489772	25.39435558	13.96438669	24.64852448	25.95873991	15.07722901	42.09505977	40.4794803	37.41777156	2.450502126	2.787962998	1.835282733	0.028275564	0.045502605	0.01697796	0.001599744	0.461413614	0.022553621	0.026970601	3.937134162	26.8140772	0.019783048	0.022180677	1.436164074	0.006769002	19.39502332	2.57561591	1.025253726
CG12541	0.156118744	0	1.260491	0.484787267	0.380670536	0.060225399	0.356348097	1.0651812	0.063160268	0.137673733	0.297045594	0.715342553	0.454933174	0.129153987	0.005640908	0.582910523	0.272205742	1.113409232	0.768624979	0.417786155	0.570951114	1.439536388	1.330938941	0.605452342	1.349352663	1.932916676	0.895329333	2.468650468	2.569702884	1.941429136	0.480472293	0.426543652	0.320492996	0.264452151	0.609906338	0.290482793	0.178932022	0.385746337	0.031627605	0.12070955	0.804643146	1.86210631	0.18326091	0	0.083386618	0.056166694	1.997752069	0	0.174471088
CG12581	5.329627214	4.415535321	6.078377262	4.76443738	6.103269318	4.963227776	3.17963942	3.012113874	2.389912444	2.487110252	4.260045878	3.030481921	5.130526469	5.169950137	5.121957038	4.095274661	3.508708627	7.063212579	6.25878504	5.169104574	5.865435467	9.954621772	8.095679621	10.25693817	12.83986301	11.30595495	12.01772437	16.25658229	13.68083337	13.90094146	10.89483559	9.737977221	11.64062278	3.282274509	2.804700725	2.360502277	0.597800642	19.12816268	2.59311692	2.145348824	29.02635384	8.857233615	1.65772196	1.80090854	42.47902907	0.101584988	3.718674603	13.90120663	4.805237551
CG12643	3.498187583	6.758416458	2.533758384	15.1300444	9.217512382	3.915435505	1.48053631	1.688816763	3.66399155	5.278113635	6.162067887	1.887942153	12.45564835	5.160566793	11.79274891	2.157892326	2.775567865	2.130268526	2.345248641	7.922012625	8.620989507	0.966368922	1.162017768	3.127515654	2.279102641	1.027920292	3.237429879	0.655824812	1.942623764	2.621803842	2.491549745	1.224438744	3.612725848	11.29873132	8.769481521	6.18638349	0.682265738	1.684973162	0.133561761	0	13.45393786	47.34317893	9.092357665	16.55930518	9.257275	11.62279451	44.50971907	26.41584565	9.158488255
CG12655	2.067618195	1.350682507	0.95461642	2.801827356	0.424430961	0.894845951	1.397139657	0.629551362	1.344493888	0.938878753	1.172259156	3.378732633	0.467793476	0.986934097	0.534754528	1.523415403	1.69506939	1.556026957	4.758581645	0.645298592	0.357520824	0.774594451	1.211607206	2.421488926	1.959158455	0.988522301	3.624214251	2.836678753	3.446974321	8.721501914	1.900876195	3.064014402	4.866035859	1.959397508	0.881712789	0.333584169	4.653514197	0.805531702	0.179543076	0.157817999	8.490877066	0.922787473	1.927668024	0	0.510439733	0.675568498	0.131914791	0	0.384435934
CG12716	0	0	0.474706217	0	0	0	0	1.261589141	2.605937239	3.079716685	2.475968248	2.285540512	0	0	0	0	2.393303447	0.105539077	0.037797561	0	0.196034639	0.008677972	0.150357949	0	0.26927184	0.220280042	0.013840758	0.417583679	0.159494108	0.708538129	0.271831923	1.908179449	0.875226347	0.951141411	0.303413676	0.451994163	0	0	2.204953673	8.724811914	0.03690506	0.077859789	0	0	0	0	0	0	0
CG12725	0.024592066	0.349308131	0.221381172	0.611608999	0.24961274	0.601517546	0.268367612	0.289897909	0.715418882	0.242645188	0.696194311	0.81373377	0.642220898	0.164181272	0.667338482	0.483585176	0.265055236	0.89957292	0.562540753	0.429415419	0.073997515	0	0	0	0.00517792	0	0	0	0.007542089	0.095690248	0	0	0	0.039340844	0.021416205	0	5.650247403	1.873302063	0.059130227	0.255410704	0.2116676	0	0.071240895	0.063840403	5.911671838	0.127973507	0	0	1.066390374
CG12780	7.723184984	16.65659816	141.0820127	42.08425498	11.02008543	21.46143385	44.32589485	49.16131751	28.82386971	23.98846608	10.4083907	24.77087265	4.215445981	7.10642545	11.19299604	98.39416772	57.73632322	99.33250386	132.4004418	9.979043982	1.975161718	2.439385185	0	0	0.676528878	0	0	0.210798824	0.03775063	0	4.009287609	3.812401453	5.292842821	287.2965827	268.9382267	235.1620079	21.29984053	25.94254899	0	0.988037945	0.490041681	0.096518155	179.9228221	0.080919821	6.015212611	16.77395844	2.794042583	85.86500181	2.143769904
CG12782	1.109062465	0.1102753	2.267153962	1.90154666	0.753413199	1.101592824	2.208070094	1.470949377	0.675447285	0.012853252	1.775451475	2.604849754	0.62195007	1.289060268	0.852959545	0.38073442	0.913740096	2.296495521	3.044146188	2.23809765	2.01284337	0	0	0	0.049370685	0	0	0	0	0	0.079123298	0.098802146	0.395918032	0	0.152431986	0.132770804	108.4998634	7.523834104	0.080567405	0.012638172	0	0	0.042454451	0.102114521	18.88190569	0	0.167736464	0.282097774	3.387937558
CG12825	30.86669241	12.19891909	24.41762625	98.36751704	89.11602268	73.90783046	13.44661034	15.37416871	6.438171724	7.518835542	45.87388704	11.92155595	133.0334564	85.59023135	116.4969592	16.40774134	8.314830916	21.15527167	37.6483475	132.544134	66.29671368	0.591331332	0.937140507	1.474922484	1.238041481	0.73851681	0.624764927	0.899734483	1.797612756	3.41831567	5.006978321	3.60374551	4.656367902	176.9114058	120.0148098	125.5864482	4.843747132	3.160575548	0.453612541	0.059591666	0.827774116	0.29749947	104.9982051	14.2207368	15.84214134	2.419756736	1.262883188	0.599237947	1.307427066
CG12851	0.029239984	0.118895846	1.662436277	0.125193821	0.255430277	0.288836032	0.977290203	0.206301389	0.948078086	1.021323421	0.289969136	0.728178604	0.362835854	0.168593831	0.247655648	0.846486814	0.622235114	0.972441653	1.514619473	0.145768689	0.253907744	2.971087846	3.615290436	2.649404211	4.364441603	3.796710685	2.692717017	5.443446044	7.073738858	7.276938993	0.402047247	0.66044196	0.339381904	0.04675087	0.118793114	0.021136933	1.599531437	0.527347676	0.060431217	0.005813709	1.101763369	6.951915466	0.028105172	0.069470751	1.963069154	0.008382921	15.35084276	1.569012138	0.776292537
CG12858	0.371421035	1.023733644	5.747487014	0.307186765	0.403440293	1.309466779	2.687796024	4.58743669	3.014864452	2.067174936	1.784123295	3.218709616	0.424059129	0.61772416	0.223831459	2.93019647	1.758185894	5.098968464	5.705597799	0.56813716	0.743550554	25.59152508	22.7184961	14.8066351	32.4517379	23.33244118	17.05532911	49.16233893	42.4868819	32.50220037	3.506018465	3.677397939	2.882413816	0.035896712	0.067336912	0.095702385	0.017660919	0.240781459	2.195748638	0.950617363	0.971472933	4.548045303	0	0	0.414878771	0	19.64361176	1.44696999	0.061336434
CG12950	0.530500715	0.8538775	1.199788004	0.671436403	0.211891359	0.476318246	1.265320181	1.831285129	2.396276571	2.179230497	0.603231062	1.320804967	0.304904471	0.423734167	0.4629308	0.645795816	1.496892993	1.546377344	2.115345186	0.424008116	0.225385898	6.912336283	6.782407267	6.45888349	8.239583719	7.864713233	7.47306574	11.90447968	11.79860379	14.15968076	0.70442536	0.744315036	0.356237388	0.019081171	0.06668575	0.042573485	2.474421734	1.150637976	0.042039596	0.006281242	2.960957213	16.00806806	0.043877325	0.00346293	2.263906217	0.004597774	32.49814301	2.467569384	1.025508376
CG1304	0	0	0	0.15430346	0.306606438	0.03117933	0	0	0	0.019530638	0.153153039	0	0.02766414	0.474879468	0.159131268	0	0	0.01711693	0.236378816	0.288147498	0.959399047	0	0	0	0	0.008557437	0	0	0	0	0	0.025185341	0.036706254	0.996071012	0.440996581	0.803147757	0	0	0	0	0	0	0.339864059	0	0.015116592	0	0	0	0
CG13078	0	1.236705832	0.687350295	2.668507726	2.882442537	0.812368409	0	0	0.283677453	0.212893016	0.206751819	0.549934254	0.2594465	0.307168693	0.138828313	0.0108885	0.098492297	0.203055698	0.543202695	1.603769211	1.864333991	0	0	0	0.097988073	0	0	0	0	0.022073407	0	0	0	4.406122418	2.143526898	1.355517458	1.560016574	0	0	0	0	0	1.765058995	0	0.079460747	0.345344435	0	0	0.025254603
CG13083	0.794029002	0.034717635	16.72912329	0	0.046103513	0.065164602	0.167693004	6.140899455	73.75718174	50.43707123	64.20590073	31.20540651	0.078290786	0.352213891	0	0.017277305	64.61249491	4.697016983	0.042659472	0	0	0	0	0	0.018228136	0.439105383	0	0.032932295	0	0	5.350638636	33.03125313	12.14384242	6.751597742	6.163798477	4.872885679	0	0	37.09218541	142.0827077	0.109368015	0	0	0	0.022532493	0	0.054523114	0	0
CG13084	0	0.115916633	1.491547647	0	0	0.007927487	0.00900561	0.267569095	22.91389996	20.96978872	27.69107613	20.39612455	0.00641242	0.026616312	0	0.006367953	12.29964747	1.905721569	0	0.007036252	0	0	0.009718739	0	0.008987534	0.138066471	0.045382799	0.014573608	0.025914809	0	1.643638835	8.904454551	7.179405594	1.575797723	1.570938514	1.97472149	0.023249229	0.925659857	10.19781186	36.6830049	0	0	0	0	0.014775141	0	0.020139544	0	0
CG13113	0	0	0	0	0	0	0.010713096	0.794708516	0.473260496	0.385112866	1.585084489	1.164067452	0	0	0	0	1.115457824	0.290603076	0.498780987	0	0	0	0	0	0	0.059502313	0	0.019252468	0	0	0.153583982	1.371185454	0.742749496	0.710868673	0.481878975	0.576775245	0	0	1.958893717	5.766830834	0	0	0.029493077	0	0.013796223	0	0	0	0
CG13114	0.017328047	0.658461447	4.306432691	0	0.015324569	0.347161793	0.004558467	1.87482212	25.62899435	22.0618182	42.09346665	35.65500672	0	0.010993697	0	0.02902606	15.78303782	7.410440295	0	0	0	0.02800427	0	0	0.018062142	0.208711563	0	0.017321407	0	0	4.447511914	9.043639358	10.10781351	4.471260694	5.682418895	1.702752122	0	0	27.16975599	73.8710794	0.103964333	0	0	0	0.007644723	0	0	1.556564657	0
CG13124	51.97666625	73.77784621	290.711978	51.36329447	37.30722339	85.0158158	132.5346643	214.5479837	64.14030008	42.56786064	76.35236619	77.35868266	79.18635059	50.56477378	60.3427016	113.3974713	73.7814354	149.8502827	142.4132167	54.49481983	39.25934033	190.1992811	175.1011809	101.4906303	159.5716104	195.3679246	91.15453077	191.2165118	224.1410648	228.2175275	325.5775773	371.1591367	233.1790835	42.69052622	65.30442888	41.96002886	16.79185257	47.60974669	6.337010186	7.268039703	51.09476757	32.69603227	56.93425047	8.003064881	9.33271508	22.92040063	57.55203145	79.44179085	16.45687817
CG13155	0	0.102764199	0.234070508	0.217839498	0.38238401	0.02426849	0.419594762	0	0.047275614	0	0.619126021	0.840142361	0.204654148	0.184541592	0	0.509499999	0.136865725	3.171901901	0.815541302	0	0	0.019453587	0.098060739	0.057016243	0.364644817	0.567003773	0.093987964	0	0.020945511	0.147091345	23.85278877	21.27173975	15.38905498	0.678572082	1.565845367	0.295838162	0.040698852	0.388480323	0.070388284	0.012307443	0.952689156	0.046751754	0	0.044897449	0.012332873	0	0.134666152	0	0.21434932
CG13215	7.809377975	0.785972052	4.268843634	8.217079804	2.9752865	5.021703316	14.77092021	7.76666661	1.990509034	0.838347663	4.809600203	8.638477217	3.556944976	2.909713277	1.239233843	7.521996829	1.679567479	8.977615625	3.84500341	3.197724002	2.513108166	0.341498825	0.083821111	0.027216416	0	0	0	1.730172404	0.156116208	0.774289666	0.64137757	1.379394386	1.213285614	3.708028255	4.407318454	2.322632818	0	1.501912933	0	0.007317346	22.0691744	0	0.439234863	0	0.076580552	0.21159589	0	0	0.445295933
CG13283	0.012439574	0.399883995	1.299056439	0.856563189	0.313715737	1.023911722	1.766266056	0.738103968	0.144514203	0.162589165	0.573180011	1.333465184	1.423104438	0.465538977	2.212468258	3.009355246	0.088406134	2.292968884	0.845199711	1.313682814	0.451234026	3.420365521	3.977979966	9.346350625	2.282075304	5.028245914	15.05998466	4.385372118	4.566199948	12.99641264	2.179426413	2.830594443	5.811446232	0.444746713	0.101337687	0.228959793	0.023103118	0	0.047710731	0.012243371	0.148161337	0.015692391	0	1.499938986	0.046564274	0	0.019409864	0	0.117307922
CG13284	4.166106843	2.291760854	12.71742951	5.296698408	2.647931256	3.64882334	4.285874913	3.463058617	3.472445196	3.435593769	6.649421504	7.17456585	6.022661766	3.888935194	2.509424445	6.539518267	2.813259562	11.54350215	19.13848698	4.777506321	2.477883196	8.155181003	10.18809247	10.72129976	6.915209024	8.062965669	15.66015218	7.226546076	10.96066915	12.11647288	21.97966478	29.46790829	26.02674611	28.36980219	19.83905675	15.11850975	1.575892817	16.00033287	0.205467312	0.087781344	11.86549687	1.574653632	2.55404527	0	0.789345225	4.362435418	9.538249407	8.273492591	1.794796333
CG13285	3.516251793	3.880532666	3.777524509	6.565117817	8.958382279	5.721112859	0.847463319	2.899890518	1.279116486	0.618830459	3.872601724	0.686866657	18.88703341	13.53102098	9.128703293	1.618584684	0.541596833	3.068152049	2.699020826	13.61725439	9.651372724	0.286962869	0.259664047	0.117653766	1.239374061	1.029042568	0.381021307	0.841700146	0.469170573	0.987695328	1.267558521	1.486037208	1.501075439	12.31548997	8.191859968	11.43244475	19.26250296	5.695435572	0	0	2.441447833	1.300454407	12.00749714	0.139628904	2.591935088	7.421201127	0.482774194	0	0.639063359
CG13311	7.110359556	11.23006772	0.025990558	14.3502225	22.62782462	16.732902	2.769336275	0.401619212	1.610503617	0.752013044	12.67171621	4.189719281	47.57865162	25.2452951	27.51898417	4.326160045	2.523507822	2.920462692	5.484393679	33.52977423	32.77687995	0.193964556	0	0	0	0	0	0	0	0	0.850518729	0.475017017	1.603151478	30.47770739	12.37502055	17.10426964	0.277536459	0.283201126	0	0.037688864	0.040890556	0.057138623	11.99820847	0.059176059	0.424018721	0	0	0	0.037154405
CG13315	2153.017734	1217.769891	2363.577627	1473.953054	2394.043908	1122.910551	556.0039722	571.004123	997.6938133	828.9624354	903.9326225	383.2368073	2870.893899	1964.465029	554.2049852	1673.627285	1319.245974	1522.09573	1649.808253	1377.279326	1096.974045	2087.517593	2249.15685	1667.82743	1000.429203	2569.851189	2241.471893	2566.864691	2322.340145	3234.301957	1590.103813	1301.961752	1880.822733	10026.94116	4949.143792	5318.135824	668.5985796	563.7481753	9.501963588	16.90124567	50.54583215	6.003445587	2805.025683	1478.778215	262.9387777	82.73660753	6.867480305	95.46761388	102.9450235
CG13324	125.9312016	136.5833932	25.32008863	169.4859831	295.0115693	177.5135379	3.551668273	28.18925175	56.66793686	62.22010093	139.584146	5.905437875	535.8271819	361.0931695	593.3683885	2.029390797	31.96326828	3.71085717	43.43519108	524.6766018	649.1525896	0.102074113	0.198978393	1.979878884	0.209644105	0.009223353	0	0.023667508	0	0	7.923379609	5.618583634	27.92688305	231.3823073	63.43615888	281.7706738	0.765645677	0.566608217	0	0.009009138	5.135086511	4.64526978	657.0815066	0.356330482	42.64314062	14.83636423	0.547042412	0	5.715823026
CG13360	66.98549175	43.87880996	9.104139875	50.61960804	157.4320745	93.84874249	2.626294958	2.224055889	3.584519733	2.607643068	76.23823601	8.707574694	58.66302666	129.510369	35.31742698	1.138075283	7.035694936	9.805550197	7.370030128	114.002842	189.9815226	44.78180558	95.46005768	31.90588795	51.99195159	31.28615824	34.77064378	39.93700428	30.9945348	14.40198955	41.64415965	42.83389436	44.38418355	7.884570693	5.681014543	3.665817727	6.410214925	1.874676142	0.309488251	0.055319244	3.863453861	0.241623761	2.245470988	200.7813995	2.156570592	1.788275055	0.585701924	1.00048702	1.658860686
CG13428	1.423965463	0.471397672	152.5713991	0.077799821	0.022347117	29.21280143	53.51451741	43.04606354	100.8332867	52.49521093	56.68361533	81.60379761	0.09466533	1.275612843	0.119861257	141.7896927	70.59906044	173.7721477	199.2352844	0.479046328	0.705836042	39.68039125	14.70033775	26.97151879	27.07498538	34.97712477	27.70596125	55.8481002	56.30410672	31.49543532	429.2437674	591.7642197	597.450045	5.333098456	5.970623169	9.164760356	6.30924281	10.17782228	0.238753097	0.069785402	4.706600454	0.064169073	0.016398933	0	0.313835349	0	0.452179195	0	0
CG13492	10.09177371	7.061220536	6.552753039	3.137177132	14.845447	25.3018294	5.811245204	1.717961651	3.377994706	1.913923356	14.30352754	9.818559427	14.09387512	18.89807338	8.038262974	7.096143812	2.945468194	12.33558565	26.13966231	16.59927254	26.0376275	0.479498264	0.001650795	0.006397657	0.258471808	0.001591484	0.082707985	0.007936466	0.0422703	0.004357696	0.727055313	0.606723966	1.111566375	71.08197119	68.0421063	79.44081343	1.493725405	2.822429926	0.019796985	0.009831574	0.00873131	0.003644377	7.539484823	0.078868734	3.67308583	0.024994232	0.020350801	0.465130392	0.020912337
CG13532	0.404384162	2.480839855	2.965498494	1.329605883	0.658773428	0.934208247	1.380729505	0.686260837	4.292613522	3.949644	0.749824823	0.719102471	0.226225447	0.422219533	0.700270499	0.158102871	2.851115266	1.893906142	1.687719972	0.674985274	0.593906998	5.649594447	5.231483621	4.499645579	5.477572313	6.412878496	5.179487218	11.65308088	10.57877905	8.664157254	1.068463676	0.712809906	0.508505097	0.016786772	0.050936578	0.008591488	0.135205465	0.645925601	0.012688276	0.016990341	3.731614879	25.90664778	0.005033526	0	2.143767041	0	41.08429428	0.824321827	1.438909937
CG13559	0	0.175027929	2.427723439	0.413521524	0.282852052	0.26599359	0.575073213	0	0.312014229	0	0.08351449	0.19359274	0.393198671	0.780193132	0.43492507	0.61049782	0	2.309204696	1.035065572	0.452004241	0.176120295	1.26221948	0.435230991	0.741815178	2.22664385	1.011850734	2.863628769	1.43222591	0.706258495	0.933720847	0.87685476	0.645560389	0.896754725	0.312368375	0	0	3.074220988	29.42334008	0	0	0	0.219112112	0	0	0.021063722	0	0.045812778	0	0.023850208
CG13618	0.052563296	0.373307118	13.07122145	1.643855971	1.285455857	4.730636854	5.773603824	3.789661681	1.564171977	2.730454105	3.284360158	6.567599812	1.459182045	1.220577983	0.867508229	4.930585805	2.636882415	12.26301689	17.72470781	1.090841988	0.586007356	4.547502675	6.127038508	7.236307949	5.202212282	5.513151262	11.2030249	4.163505996	5.053101179	7.63283373	5.853297418	7.721985111	13.44940419	26.70889446	20.58312466	18.78639769	0.426953514	2.090759725	0.089523035	0.074763427	3.002454413	0	0.131266723	0.203350459	0.305080621	0	3.16216486	5.873130885	0
CG13631	6.068471463	5.71049876	24.48275208	6.275619113	5.876900245	10.87539147	18.84827738	24.82349225	13.88802313	7.535653294	10.15188983	15.28105126	4.248014227	5.526059758	4.325151725	17.33560219	8.905454823	23.79015865	25.40648367	5.702530204	2.654797748	20.5507714	23.50412477	17.75285662	16.10822381	23.72896495	18.49819043	26.46709983	38.3073356	39.87392808	23.92770241	29.67721859	31.65229481	6.788393019	7.827900179	5.724546384	3.147535639	18.81267419	4.665041112	4.237642808	6.967931576	2.860303405	3.329193301	2.398340892	2.092744026	22.34227613	22.62012095	41.59427405	2.706703892
CG13650	1.941699315	0.356687651	6.998716641	1.662589305	0.374952284	1.462337752	4.523817238	3.625624095	1.36571445	0.766301546	1.253112404	2.186943339	0.8910883	0.895475475	0.616650756	4.151354449	1.098125954	4.891930724	4.650829523	1.328120641	0.529937218	19.31255877	16.20814901	13.3624437	28.14905175	23.27882025	16.87194446	41.15409916	32.18070683	31.27080448	3.295341032	4.102439735	2.640788295	0.980040725	1.40182221	1.200429518	0.461874236	2.636534893	0.802444682	0.346040325	2.426313459	5.676583093	1.052236374	0.031673751	1.165186925	0	18.98317581	2.442938038	0.391800175
CG13658	0.039220602	0.101575279	2.395255392	1.940236973	2.25965086	1.326638015	2.744412493	0.211446552	0.013401098	0.025464847	0.635132918	1.152653412	3.937191484	1.593583021	4.99116183	4.1681427	0.766275985	1.227832342	2.823515912	2.853848768	1.987731455	0.803136664	0.165443397	0.260122032	0.05717737	0.542260757	0.585193282	0.051781906	0.776547545	1.403705339	0.326223503	0.194450574	0.382090939	11.4814478	6.123893587	5.437433797	0.209952004	0.09488347	0.125702558	0	0	0	2.661306699	0	0.305258609	0.033795491	0	0	0
CG13689	2.328935184	6.019121743	8.101523837	6.967907366	3.56822598	3.565232791	15.21105446	10.78331346	4.537201609	3.452363542	3.408413127	6.153135409	5.323397977	2.333560315	4.282702238	12.6792019	8.782266514	8.742292843	6.122715265	5.257744982	2.790152757	2.665581227	3.187232028	1.339820389	3.334036752	2.757627407	1.911825986	3.284740379	5.654280645	3.801550738	2.204988104	2.419393644	1.460091792	3.109366554	3.045038898	2.324456674	2.316187619	4.932471703	18.23918844	16.16888076	7.71760802	13.27159971	7.962109162	1.199593036	4.936397024	3.221558995	10.88084406	6.777064431	9.577118602
CG13784	13.11832318	9.568710182	24.26033747	14.07315875	10.70237157	17.34669782	26.35296566	25.44370674	24.791401	15.82573883	16.55210117	23.47483697	13.51424527	10.97263615	11.33094978	28.91348058	20.78055382	29.32333823	29.53906896	9.300235299	6.114731696	35.82699021	40.90425874	29.79323144	35.20470981	32.68306781	31.71975241	45.8627312	49.26218969	52.13217019	28.63677144	29.67191167	26.63398173	21.55876994	28.30967305	22.24170156	8.420717904	16.02129092	24.57945739	30.44741547	25.33723622	14.13598348	14.44108405	30.28878289	10.81789548	10.92322011	14.18977987	21.72169211	103.8910977
CG13786	0.06444058	0	0.333651516	0.075010701	0	0.099948589	0.266961792	0.283836655	0.842934965	0.831441889	0.436731277	0.226171437	0	0	0	0.014746724	0.385705351	0.273514281	0.048062108	0	0	0.077554168	0.004064818	0	0.006065083	0.01949006	0	0.030283833	0.042141666	0	0.056417184	0.134158275	0.131113627	0	0.096544083	0.018506423	0.562956047	0.118389953	0.223811315	0.949233558	0.042998904	0.087156269	0	0.013035286	0.347967536	0	0.385600414	0	0.110943574
CG13793	0.027714056	0.135551026	0.74117715	0.357453925	0.015378661	0.061128739	0.531550199	0.422402782	0.057125946	0.027167361	0.325187866	0.338194409	0.230845392	0.158649687	0.107442376	0.582423481	0.005858084	1.667337733	0.945775703	0.136861619	0.184315378	0.788461992	1.460096294	2.247831647	1.391061682	0.594035007	2.483013639	1.274814385	1.933166918	1.544083684	3.636753293	4.676654767	2.32434601	1.07447679	0.959601972	0.405618164	0.163679067	0.651533513	0.03356524	0.009925358	0.241647034	0.038502788	0.114758029	0	0.277516168	0.124857029	0	0	0
CG13794	0.012853865	0.024180379	0.996006714	0.075659575	0.122221284	0.365742795	0.60482533	0.601981773	0.035307658	0.27144189	0.491274593	1.042654518	0.028893028	0.02446522	0.069286243	1.113946434	0.121242651	1.482518642	1.070189474	0.046657896	0.064377857	3.754894325	6.265032622	10.1220053	5.279709894	5.135925414	16.29621156	4.475179833	7.756504341	7.183675275	4.602290764	6.546540665	7.239757112	0.731189194	0.588987866	0.396037622	0.027143396	0.226023723	0.064788947	0.004603412	0.140762495	0.040802488	0.073928827	0	0.119972904	0	0.085944328	0	0.016363457
CG13833	0	0.200043264	2.017962496	0.786301404	0.128242442	0.698869548	1.047876957	0.782854742	0.497624024	0.14978695	1.435347225	2.687653138	0.129816028	0.200635914	0.093796724	1.978602427	0.715044844	5.611383286	4.179735327	0.292271839	0	9.695777009	6.922857306	8.653688149	6.18314368	7.624749591	7.536729711	19.05657882	19.52025071	35.79329162	8.642541885	7.235648409	6.24488126	0	0.072776016	0.011325277	0.037781239	0.092533737	0	0.051889436	1.25312307	0	0	0	0.062586533	0.020831788	0.094582594	0	0
CG13871	2.603593167	0.826702347	5.604431043	2.432570448	0.80096593	2.037194322	3.033665304	4.633329539	1.444618057	1.153443382	1.493867837	2.235287369	0.77204115	0.8966454	2.278541432	1.717981834	1.411494989	4.784440319	3.055046115	1.877879257	1.734710457	0.035085866	0.066556627	0.032289144	0.128664249	0.024949177	0.039683089	0.383991777	0.216789019	0.30991666	0.039873776	0.234438576	0.531136672	0.184954929	0.430929237	0.013679232	49.14423471	18.63154736	0.010095467	0	0.153384546	0.213036597	0.196010082	0.675211953	40.74484277	0.025380465	0.189346852	3.485174324	10.17401099
CG13896	0.82797621	2.480988273	2.185228358	4.154018172	1.98940615	2.397487412	2.843600213	0.459121436	1.615189352	0.474209112	2.395886923	2.78463946	1.943772797	0.8952794	1.628337764	1.841212776	2.390781647	1.445762494	1.463411462	1.32707377	0.296731424	0.598933603	0.835493328	0.295356557	0.63628145	0.588162081	0.483609322	0.473819847	1.430946123	2.036282239	0.521255453	0.672494476	0.587955532	0.943708856	0.605503034	0.448491466	3.535356196	1.337897043	3.939020016	5.809608835	3.320036567	4.388578181	1.014291594	0.160253551	6.511672526	0.398717641	2.592504104	0	1.994609848
CG13905	4.32951427	18.88870812	117.2066567	26.4823275	28.94507906	31.83682489	25.46959614	21.04158234	17.60261579	10.40206361	13.2998233	29.9525302	40.43819734	27.27277722	19.74796418	22.13343411	13.1454958	9.451352672	95.37661546	28.59840942	13.92510588	1.164601108	0	0	0.007171591	0.119388165	0	0.038613393	0	0.020601847	10.49448484	6.62104941	15.06591508	261.0481488	114.5643836	206.3508148	9.493116343	6.140688912	0.150212678	0.098899155	4.899405181	0.463507128	55.14190746	0.847003905	1.93091389	1.069920096	0.488957046	4.787476352	8.950854761
CG13912	4.515837722	10.96923256	7.263646426	11.01805851	15.09745229	6.700102642	8.411963043	5.440839713	3.883709011	3.039849116	10.29733877	5.868792474	9.491641412	9.851908734	4.75514964	3.9324107	5.618202436	15.04898028	5.986163672	10.25343138	14.19913227	22.95543564	37.80914409	17.88341787	15.91688951	22.87745821	18.80036009	10.23228979	18.39606059	21.64321556	16.00422097	17.84729998	25.15548101	12.66785151	10.30227492	5.879087879	1.849583647	0.949450479	1.702537348	2.373389737	0.880382874	0.242873567	2.152033344	29.08238228	0.495755746	1.240169976	0.025115667	0	5.589886363
CG13947	67.34123258	12.03182518	56.77073684	11.29639191	30.91615971	20.00955924	16.79476534	65.69909613	108.8353175	106.6073609	136.1847432	79.90639713	55.29596758	31.60618703	69.05579044	128.0883015	117.871254	28.67151334	80.40092564	20.61651234	23.22294354	7.738196328	2.786738838	4.22086541	11.46510402	11.90385946	10.20428404	5.551443726	4.220690305	0.123839076	277.6852092	330.8642474	419.9654214	78.09115603	236.3688435	124.3550055	340.0770502	32.6574153	0.036360942	0.04764427	9.945885711	0.301443337	0.076555501	0	2.401791211	58.86160126	0.374341771	0	0
CG13965	0	0	23.43765262	0.227030865	0.050468932	1.962847392	4.816741161	6.032521677	7.54753599	3.128634561	6.878510183	8.321473942	0	0.747410672	0	3.170798975	3.330573242	13.50511798	25.70092128	0.347319186	0	4.558516034	7.759970048	31.40020364	7.601074381	6.624982201	38.71543545	4.379123334	8.822709466	21.83667931	14.59174551	14.25375774	38.75245815	5.603089604	5.132366558	2.522733947	99.78107075	1087.809859	0.039302796	0.01375283	0.701273923	0	0.027493863	0	0.132193537	0	0.044960014	0	0
CG13992	0.363748465	0	2.111034742	0.021416442	0	0.136464943	0.244940013	0.568184489	3.866901959	3.249456592	5.948778209	5.643105266	0.065537051	0	0.046280511	0.297775931	2.440636247	1.130008888	1.377047596	0.065847004	0	0.019184975	0.006454271	0	0.061607349	0.030999021	0.019742783	0.00430449	0	0	1.305648424	2.088749321	1.207712174	0.245846448	2.081203639	0.37378732	0.576445474	0.094383937	8.171452234	8.390945456	0.196505947	0.081257316	0.041161913	0.791723463	0.617867646	0	0.066641338	0	0.02936543
CG14036	4.932580974	3.222980239	51.71683058	3.19378354	2.314432038	82.78248925	229.6419239	308.2483793	65.5708386	37.86847903	72.97030341	195.5547254	1.149973639	4.737950765	2.222244437	225.550433	73.73456704	175.8229336	113.2232483	3.413476892	3.414344707	3.275434069	0	0.779069655	0.231693697	0.761829788	0.062838004	0.436750388	0.097989606	1.586116797	6.828885179	18.31660847	11.21119642	5.060879292	12.64956232	7.137499503	232.4281044	23.52748049	349.9576618	342.5588833	1.52279378	1.890247291	0.814996648	0.060225746	37.5515476	0.53929972	0.812268282	6.922798808	8.598237846
CG14075	1.278180949	1.97819037	1.603248619	2.710516856	3.803968961	3.367754163	2.099549295	1.728536365	3.713788829	1.752156067	3.341588508	5.358384565	3.234015074	4.030432409	3.773648213	2.801503995	1.477709806	2.266206405	8.697894843	4.254470906	7.425376079	0.179407177	0.414342947	1.46102867	0.634451351	0.559041816	1.212374579	0.255893151	0.984141567	1.360419449	2.377687051	2.888631436	7.112096659	9.978823815	5.13563104	7.713724951	0.864284106	1.149488209	0	0	3.475843288	30.47066304	0.756466332	0	1.394291287	0.18722218	14.37845094	0	2.103218733
CG14079	0	0	0	0.052062846	0	0	0	0	0	0	0.192849083	0.251280132	0	0.071056822	0.105562166	0.153941767	0	0.244117081	0.204955975	0.148292232	0.427751496	0	0.063997808	0	0	0	0	0.025604867	0.173481852	0.344656284	0.030135302	0.09031269	0.138279013	0	0	0.041533954	0.908456324	0.141172784	0.177434611	0.048012826	0.261500987	0.39467383	0.048667297	0	0.573232083	0.210583782	0.495719545	0.538967292	0.207364704
CG14105	0.019624657	0	0.513618813	0.090633564	0.42949582	0.316859519	0	0	0.133583163	0	0.671295739	0.462867174	1.773626077	0.492371368	1.674219763	1.112737034	0.131226926	1.882656824	0.841267814	0.559893338	0.457578104	3.934278645	3.89274039	6.395495306	5.695162997	3.050164634	4.651538744	5.739434216	6.690449001	8.471294552	4.956963954	4.646174541	3.780820931	0	0.00848966	0.192811602	0.045790219	0	0	0	0.035421649	0	0	0	0.00753816	0	0.030521235	0.031275359	0
CG14109	12.78412572	16.88356061	22.08153106	23.62912051	15.51389755	14.51788466	19.67271307	7.906176823	12.05531645	13.89711067	14.4626909	21.93252884	11.56801452	13.61045251	6.968366547	17.6107242	12.40527048	21.78342626	23.79879635	10.68734597	9.16810967	23.65479241	25.55293732	8.42389319	23.94132886	21.28155726	9.883372383	22.76271062	19.96055191	21.36915996	52.70209512	32.90687333	18.71299153	1.184849932	1.940301374	0.97158052	1.448237563	3.001136527	0.033742162	0.074458325	81.29551268	2.242826601	6.177491788	0	0.473826867	3.13181029	3.595025452	0	1.358011237
CG14110	0	0	9.065803433	0	0	2.384065966	2.478053824	1.051043983	1.856701459	0.0804361	0.042019635	2.142615621	0.027486848	0	0.042185079	13.9152422	1.137603832	3.10001753	6.696165509	0	0	0.36585057	0.11047256	0.319211821	0.132676289	0	0.523917567	0	0.029812251	0.232268282	0.131610188	0.420287298	0.120349525	0	1.104464309	0.278608061	0.047678919	0.20306847	0	0.035819328	0.022215782	0.062106707	0	0	0.147989193	0.021080469	4.288633924	17.80488766	0.197747413
CG14120	43.91676525	84.63649987	54.40456128	8.330531002	15.04435371	25.54248027	4.949967595	5.702723363	16.92549724	13.01106917	16.9137259	3.620049343	24.50795877	30.56107207	26.36585724	22.59422008	16.3399241	33.91261429	22.22091852	35.42926812	20.3243413	0.604691605	0.010720008	0.020792978	0.703725524	0.016140565	0.017239551	0.069628936	0.034594782	0.023732042	0.848774978	1.078177177	2.489641571	124.2135561	129.5443607	97.65243607	7.551003898	17.96903699	0.015075817	0.007894061	0.262931953	0.007990809	66.01002881	0.126693614	6.507795667	0.744711102	0.014777413	1.210031925	0.028359046
CG14125	0	0.440300043	462.1827012	0.214381728	0.768713404	45.72386378	70.08428948	265.6377371	40.74382302	30.09300382	40.87138139	49.49428776	0.21935676	1.680029586	0.075895685	337.1855184	90.27166603	239.9526615	306.3507246	0.645605415	0.01475862	0.231479909	6.387183316	20.08490558	3.174744133	0.123630162	0.089415545	0.654249261	0	0	236.3011227	311.1541542	422.0139864	1577.465928	1336.146833	1018.778231	0.987588858	4.71956375	0.040359556	0.073986406	1.360886412	0	1.763877292	0.038198429	0.322274556	0	0.069403876	0	0.328085901
CG14147	0	0	1.580800138	0	0	0.525940912	2.760380437	1.522545756	0.845943275	0	0.23837975	0.315230219	0.013008769	0.176243152	0	1.838548725	0.49423674	3.347201203	5.884108478	0	0	0	0	0	0	0	0	0.013149178	0.082499072	0	0	0.058908085	0	0	0	0	0	0	0.094623782	0	0.047313532	0	0.075117232	0	0.090420703	0.01505816	0.027356261	0	0
CG14186	0.448613047	0.333210146	3.862672136	0.381196565	0.467051603	1.937825161	7.878687781	3.753381485	2.511948182	1.423294989	0.748107633	4.05405754	0.355296445	0.54145171	0.331926361	4.501792232	1.206096441	2.01650282	3.378553344	0.203834964	0.215301547	17.71372194	19.79569399	13.70754918	13.6077489	22.55001001	17.11753652	32.02947131	32.35045253	31.70629835	1.769862393	2.134319283	2.300980069	0.035938137	0.11324335	0.067558713	0.022969219	0.097193145	0.033485908	0.033559199	1.052706004	4.854305482	0.05419837	0.039261521	0.431936066	0.243505313	9.505794647	1.484328254	0.302332717
CG14187	0.036786199	0	0	0.00129547	0	0.187750172	0	0	0.150990515	0.240167942	2.638299415	1.611738674	0	0	0.005098855	0.031456962	0.323962529	0.233231178	0.090552983	0	0	0.00568802	0.001796036	0.040339131	0	0.007616166	0	0.003504165	0	0.020940686	0.314546456	0.385179443	0.034107918	0.329146349	0.406477259	0.05676717	0.108864131	0	1.399808312	1.874698064	0.002165834	0	0	0.040258148	0.080529914	0	0.016748766	0	0.031644692
CG14196	0.625872163	1.747096431	2.052421411	1.061824043	2.794517794	2.309992682	2.047179865	1.538145989	0.701084519	0.303463058	2.407396916	3.767962085	1.580495285	2.874599044	1.301899698	5.2349812	0.942621552	5.358172191	6.917484748	1.731366802	2.598433296	2.431181791	4.20462166	4.666072207	4.483386895	3.323200821	5.878129076	3.176171439	4.135980959	4.086200732	6.618986615	7.112160441	8.19261483	7.46657758	5.783884481	7.282599458	1.650049547	1.54657232	0.250984623	0.148333508	0.186220579	0.052509156	0.89859749	7.334663897	0.111853181	0.156337899	0.114564014	0	1.092689858
CG14205	16.21554159	10.47509576	9.008763163	15.90478257	24.28346301	14.97894238	2.71122441	1.241264847	2.093706037	1.141634785	13.35642589	4.16621285	131.8246864	62.30716761	7.753284843	1.453120175	2.543029117	8.263585366	15.83320965	19.61867575	15.71717449	0.163042876	0	0.024983345	0.064759431	0.006566314	0.031155121	0	0	0	0.503830049	0.291322298	0.196244276	83.80603528	44.33717967	42.53031557	0.757563183	0.979941879	0.042657533	0	0.010347727	0	3.76124458	0	0.530221058	0	0	0	0
CG14219	0.309360546	0.655754933	1.149700716	1.024539841	1.764136138	2.174820799	0.176221624	0.186458666	0.617589302	0.027215463	1.609634319	0.650297621	5.716568927	5.002395373	3.051210158	0.063737154	0.109399456	1.012066421	3.582174961	5.794469286	2.312169096	0.013362862	0	0	0	0	0	0	0.021614875	0	0.047763027	0.11974023	0.144812192	11.40175646	3.352933578	4.782340868	0.246752334	0.05380746	0.032318517	0	0	0	1.416106814	0	0.215148514	0	0	0	0
CG14274	0	0.073905462	2.015047364	0.324965542	0.152007098	0.407526668	0.782055677	0	0.381426718	0.354074217	0.220322791	0.70619684	0.329646683	0.112544213	0.318064623	0.710749892	0.102844424	0.610651484	1.040272467	0.333601186	0.119813038	7.447945719	7.528943756	3.453147955	6.945111876	8.765437794	5.23109973	10.20338926	12.32962058	13.17930158	1.174060686	1.427292265	1.098314206	0.049293044	0.042766596	0.121873766	0.131514094	0.028657796	0.022303762	0.005862488	0.652247034	2.03786915	0.376134369	0	0.155026818	0.11287833	9.132829295	0	0.069579653
CG14277	3.600221238	0.940151309	9.903895339	2.916997283	2.679994579	2.140439048	1.796811403	2.486939492	3.510334847	0.241434366	3.681069489	5.505996069	5.591258602	3.282837923	3.357666478	4.279195432	2.69444031	4.999715022	9.514079291	2.223177767	3.248399981	22.43711509	12.3722972	14.46405806	17.42483562	21.8151575	25.3779994	47.43282617	39.68665443	76.97893942	2.595040261	4.057922984	3.291418609	0	0.147854889	0.18682423	0.403165968	11.88193515	0	0.02489394	3.600718442	0.233714104	0	0	0.587540358	0	0	0	0
CG14292	3.77407271	9.383132486	43.65768774	7.863665076	22.57208138	14.846329	16.26188945	25.54058291	5.309327002	3.890512028	20.96487232	48.29384831	30.57256397	21.23024493	17.89345901	48.70019607	3.794849006	35.07452426	94.94194459	15.74101243	22.52049125	1.226615962	0	0.172838654	0.254629915	0.025905836	0	0.023780039	0.024130228	0	9.895765931	8.437536714	18.53982406	304.9176171	157.1183162	222.9294594	58.48587195	32.72288791	0.432840931	0.266569926	0.828094809	0.049951406	8.568974726	0.254313228	0.597102946	0.509061491	0.184146644	5.929150966	0
CG14302	207.8217063	186.473897	23.81853309	530.2635058	705.5836498	411.2208349	4.352023995	13.84881735	63.2738447	71.05479212	340.7349047	6.241779252	555.0322769	897.2940846	707.230262	0.217103869	58.41766524	2.660150091	0.094826385	806.8456038	1057.552521	0	0.087360681	0	0	0.011439463	0	0.01475009	0.289140969	0.025290743	0.850009954	0.128785821	0.331268814	0.551883494	0	1.996985482	0.356817991	0.350295245	0	0	13.12233335	2.616586754	881.9877471	2.946479839	46.81385849	31.37013745	0.48201829	0.869345886	4.192772509
CG14309	0.017811293	0.025395427	1.193195412	0.039627688	0.062723581	0.014686566	0.074458341	1.076517715	8.896248088	13.28614643	31.5588865	21.88355647	0.063526057	0.028046854	0.057643922	0.006539025	8.062664481	6.889038999	0.019706791	0.071067582	0.010566892	0.069504241	0.043461183	0.027706765	0.15609771	0.254916737	0.039251909	0.110136237	0.049788088	0.107596293	3.994416221	4.887056997	1.721918099	1.25796841	4.105220915	1.068978347	0.017307704	0.004279629	23.73696182	36.91813005	0.125473469	0.017488569	0	0.084014342	0.104398378	0	0.078041009	0	0.084249431
CG14317	0	0	0.02965471	0	0	0	0.992690844	0.321486712	0	0	0.159125769	0.048568552	0	0	0	0.180560141	0.196319602	0	0	0	0	0	0	0	0	0	0	0.026427245	0	1.007538568	0.094227366	0.255381679	0	0	0	0.075018902	0.024863028	0	0	0	0	0	0	0	0.032606639	0	0.047456308	0	0
CG14339	0	0.58293518	0.862593384	0.112983634	0.313102168	0.363025667	0.588244911	0.514189136	0.118084257	0.084710169	0.306398839	1.331039963	0.122796308	0.044128638	0.185027249	0.706795098	0.140729377	1.235068276	1.996816736	0.08709245	0.343711393	0	0	0.044711468	0.022193676	0	0	0	0	0	0.043955435	0.044601824	0.080584898	0.004923983	0.0528468	0.035511992	16.22606271	2.20607002	0.005591763	0	0.03045317	0.031062861	0.026154433	0.312697855	3.785996708	0	0.044804278	2.516211448	0.801135269
CG14439	1.850241184	2.169194307	2.555421812	8.367414373	4.831342013	3.536303552	0.720384517	0.365616974	2.552612856	1.371637624	3.552504005	2.799528069	6.291898418	5.609737758	4.855632606	1.519856975	1.074450155	5.231209596	4.066516789	5.942346759	4.878458197	8.938740926	12.63109154	9.123806708	14.72802221	6.501232549	10.56833016	18.30862214	16.5442415	19.5884579	16.6539199	15.78342611	10.31236145	1.512070735	0.859803378	1.298382967	1.406853089	0.367194459	0.02488333	0.004719496	20.81572525	2.232828318	0.583359339	0.006785398	4.758679514	0.013513583	0.380368948	0	2.229738555
CG14442	17.48623334	11.86774667	15.04309416	4.436965972	8.194976824	21.3918858	48.86208511	26.04389201	35.687107	23.30350111	23.6844764	55.1360682	6.495663183	8.307921104	4.956488837	44.52488738	22.96496191	36.30726661	38.62270765	5.738626019	7.349911407	15.38660283	14.71351368	13.56707121	14.07530447	18.20463115	14.55151743	20.03202111	21.53589245	21.03227128	10.40628604	13.60994332	13.52662052	8.997721931	12.53666921	11.23056624	2.007314342	12.46734672	77.02490874	73.13736157	23.8929466	47.35405429	9.707881533	6.803686767	20.26718018	1.725294475	22.66295142	7.396457809	11.45378155
CG14446	1.929844015	2.135303095	7.862801608	0.926164212	1.104134451	5.734514626	16.26129824	12.9074449	7.747895246	6.511925345	5.425711412	13.07814727	0.570658248	0.532721041	0.890973578	11.80047066	7.390903146	10.64465295	10.56961161	0.442988156	0.79007118	15.79109914	13.56239148	8.669950909	14.0684896	13.62832332	7.797753824	23.49383918	22.85846542	17.38802047	3.404038087	3.633586493	2.271986491	0.847922473	2.257395222	1.440312781	1.145559805	2.032510409	19.5318443	23.0074384	7.543887882	27.40748714	0.891094613	0.598809947	6.745896599	1.053791691	59.3291262	3.533861975	2.609254821
CG14456	14.92651886	11.93937315	4.996876122	13.52853307	12.90799081	6.693949492	5.26292664	1.463230593	2.830130881	1.465828272	8.205920463	5.276497	10.05092458	14.56296275	15.65700897	2.982469218	2.158953265	7.436849855	8.516487096	14.2475016	19.27417776	2.018265292	0.835296652	0.928961618	1.450780243	1.721743116	1.132546699	2.176097255	1.802208066	2.681878394	0.238856732	0.68522287	2.177166963	0.671315141	0.828954303	1.469785141	86.71367605	11.77516777	0	0.009595844	15.0906433	1.483899972	1.343474422	0.852635335	50.48809199	0	1.189226398	10.68610665	6.228524523
CG14544	0.547429271	0.480936671	1.246871084	3.066877013	3.269782251	4.288108828	3.610454614	1.928699116	0.551259241	1.758738431	3.549886252	5.862755473	1.038012714	2.730022896	1.489903296	4.674733952	0.832403548	5.132871601	3.780714343	3.454078095	4.185489688	0.27906705	1.218002822	0.440827703	0.284601014	0.985319018	0.517375487	0.215889341	1.035735063	0.798842213	0.213851377	1.226011058	1.57833309	1.180376988	2.347964486	2.188290628	1.239114032	1.070648925	9.720707372	6.078166476	4.18369391	3.887233714	1.082130888	0.255145906	6.303043216	0.205713238	0.636158848	0	0.570959896
CG14567	1.778662901	0.363903723	2.720449263	8.441888791	2.162643178	1.772553914	1.442903005	0.238129724	1.228709895	1.357147923	2.280131433	2.296839892	5.893996055	4.547805363	4.265118992	1.215844863	1.58700148	2.11662498	2.333081333	4.509189057	4.286080381	5.582632654	6.21100188	10.92347946	5.685178708	4.703357276	13.78416941	2.448576896	6.676856294	11.3758329	10.42615873	7.671595496	17.17348713	0.783133276	0.631052697	0.626422972	0.628723764	14.61704575	0.047374058	0.012371295	2.509909486	0.736528922	2.408175518	12.01171437	0.725067369	0.669108348	4.258336544	47.55216219	15.1339999
CG14590	0.025794874	0.519151188	1.036819023	0.751114674	1.501708257	1.144240514	0.142147845	0.190213343	0.107151774	0.35527159	0.947961406	0.630852227	1.346605487	1.669274422	1.266439914	0.857109192	0.301124482	1.015693774	1.444989098	1.522578815	1.922790458	0.277414826	0.852287051	0.285709273	1.19968596	0.498457908	0.332039999	0.883060089	0.638936438	1.210022106	1.028859364	1.015437673	0.584254117	0.061897532	0.394573096	0.297448947	2.882053673	0.262095704	0.053924954	0.045385857	0.298027967	0.032752641	0.332564049	0.122327583	1.208745396	0.033558186	0.55112969	0	0.170097332
CG14607	0	0	0.416702757	0	0	0	0.016192035	0.58229493	0.024230006	0	0.39045413	0.415826574	0	0	0	0.662875078	0.11411439	1.346436627	1.134522085	0.050354046	0	0.428086777	0.207893342	0.317240136	0.426119076	0.503954753	0.367864308	1.003306699	0.626338737	0.039172599	2.672514955	4.097668922	1.793717402	0	0	0	0.014713892	0	0	0	0.045037315	0	0	0	0.029607539	0	0	0	0
CG14661	1.22636807	2.721547257	17.8291048	1.682052486	3.928352987	7.82130515	4.471045092	4.149946465	5.352692895	5.055527104	10.89843895	13.28205063	2.087561587	3.855929079	1.587794206	8.757548616	8.150340657	26.90605322	20.14137171	4.374222494	3.181088024	96.1881804	57.12055243	89.08378336	160.780062	80.37640123	95.36235084	140.4346152	115.4131189	165.8893113	330.8992945	214.8574459	177.071675	12.84449636	11.90835538	7.498488567	1.372664419	1.819994872	0.635649648	0.080432084	4.022594776	0.09156255	0.295150974	0	0.166338699	0.209120144	0.168465971	0	0.118303918
CG14662	0	0.661652952	2.522005458	0.654563708	0.484512887	0.473543306	1.549278568	0.710243435	0.421579112	0.656502753	0.790753625	1.295465854	0.467659203	0.154314939	0.347440601	0.499266047	1.52858109	0.881403489	0.812255211	0.33281325	0.042001734	0.754055758	0.47837287	0.353648609	0.402394395	0.172813855	0.436328624	0.152994442	0.486296001	0.385567653	1.202120452	1.609816503	1.135683117	0.867705703	0.624260719	0.848766613	3.576839441	1.73244087	0.039281038	0.004004248	0.085314449	0.21947648	0.410672364	0.199300502	5.188037693	0.114787635	0.016495481	0	1.070584323
CG1468	693.776804	712.117884	516.4438498	246.1377323	322.1265521	268.2093516	156.7108306	219.1986132	289.9275993	296.5745159	222.3597767	80.09137033	310.9137912	354.0887849	348.1246549	389.7971518	332.5298458	281.7482428	103.6521291	286.0223029	301.8631347	1334.726276	423.9683041	961.2861723	1218.023151	1290.079878	919.0443374	1010.52112	539.2095652	811.5245294	839.3886563	654.6618157	1559.217805	47.9914548	34.6625883	32.44570273	20.65199954	47.35062732	2.791873418	2.279494791	46.72660141	19.14494828	55.1546052	3033.720947	4.509674821	50.00367616	6.399156852	798.6498969	1688.969905
CG14687	9.612763779	14.04736324	38.46618416	133.2323348	12.79007012	12.45075127	22.23742495	17.92576994	30.26461174	23.50356239	30.39910043	29.21542567	22.71937981	12.85944407	15.14576814	28.79849182	24.60546745	47.28680242	31.61441467	13.18100571	12.53623375	146.0801155	123.7143208	66.91972316	102.9574714	139.85216	73.75884917	161.7681832	158.3142126	172.7627442	94.99677487	108.1260856	63.79553963	15.55399386	18.81892914	10.92602329	6.204733623	11.06603948	3.118444436	1.596327029	312.4174676	86.08048395	33.01709485	0.139928376	2.637352413	1.766673885	41.79775536	24.93008642	19.49883649
CG14757	0.985985296	2.780538387	33.81165068	8.016156282	6.700487355	12.16373454	19.25650707	18.10912292	7.701704133	9.169306821	17.57700724	39.30753019	5.043094854	6.152050531	5.143524543	20.276315	10.30830618	49.2308399	63.95421975	7.040887541	6.860846535	23.35529399	20.4152426	20.23432399	29.4895448	21.75934298	28.71829745	36.89387495	36.5846853	43.35270831	58.72231299	52.15655801	81.3392596	9.533006513	6.813745258	5.87734352	200.9923954	28.96238911	5.317616629	2.005315392	1.368575951	2.226007873	1.81689553	0.978815857	68.86793612	0.326015484	10.14175831	15.95389679	12.59684454
CG14762	9.436867973	10.02452384	69.99340828	4.420906718	4.406998446	15.16949278	22.29735753	26.44882692	32.6694223	28.63193916	18.07235706	23.0747461	13.77464078	13.18247985	10.62633576	29.78046741	25.38184169	47.30653559	34.5707578	6.679458162	3.904535208	157.2660162	149.7208847	249.8552942	185.5811899	197.1497375	301.559506	245.4267844	283.9992738	370.4175322	100.3105433	90.83577736	219.7276843	3.490535234	3.795879158	7.203403615	0.945178817	5.946535488	0.373242809	0.250786236	20.57058985	103.3647415	0.594266945	45.6581478	5.196920064	0.350221437	229.7058673	35.18887501	2.754510994
CG14777	2.416376563	2.247806212	3.800570601	2.725915627	5.461544506	3.504861801	3.08281696	1.138840028	3.120821651	0.710610731	5.323489932	4.995518522	4.041550797	5.876278654	2.171775371	2.16171767	1.29552423	5.383027851	8.917963871	4.286860928	7.302424763	6.479136324	12.14087845	8.519973042	7.532488963	7.119802177	12.339971	9.433774204	11.15110606	14.96076732	6.480635045	6.463000701	7.349807756	10.65641747	7.254994753	7.721559115	1.757050066	3.689286815	0.802542692	0.712920779	1.673782513	1.677093266	3.025326316	0.907526353	1.79515491	0.443949918	1.938758991	0.290626807	1.509578657
CG14820	3.251525869	5.486906809	6.458128882	6.765055064	7.854038324	10.14181095	1.443549411	0.076665324	1.255678562	0.86527016	7.291300004	1.598337968	14.54055965	11.01878138	11.19876368	2.644160012	1.750100752	6.185766442	3.623308846	20.7178544	11.54144655	0.065403449	0.011030166	0.042881367	0.02842953	0	0	0.166452309	0	0.135313667	0.325528784	0.179759304	0.249669599	54.16224309	39.8698543	26.18654401	0.725688865	1.93524022	0	0	0.033549629	0.061184522	6.714888573	0	0.933869864	0.150283969	0.159602419	0	0
CG14834	1.439082677	0.146390394	2.889534625	1.313933859	0.342467719	0.530557137	1.221310736	1.851195167	9.035421249	11.73553382	35.86754203	37.26708749	0.283355873	0.683113278	0.337207839	0.539277413	4.77920398	8.743708977	2.949516722	0.8941212	0.710330834	0.06273385	0.266434077	0.182589696	0.186945901	0.646420477	0.424698368	0.641699173	0.285791846	0.551380702	2.332002284	3.008202841	4.805644151	2.120731366	2.19763713	1.728448014	33.34119882	4.569801387	17.98856568	31.52542765	0.398800752	1.254954877	0.286867859	0.158536792	14.9396574	0.023022476	1.819572364	0	3.034815803
CG14853	4.733875289	2.670910464	9.368222598	1.229737876	0.38692435	1.949562897	3.823508198	3.620824735	10.78657411	10.01810103	1.557079807	2.859298426	0.75202909	0.597531147	0.943647802	2.813986262	7.360905536	3.967663256	5.940173143	0.691237691	1.344031597	24.18924263	47.90006299	17.70205948	18.48636901	26.73720755	21.82598112	36.80134572	67.99767184	69.03428062	2.045575308	3.307083132	1.644210124	0.024402139	0.127059976	0.031508833	0.036389533	1.447273771	0.020874192	0.005471986	3.686784875	27.13737602	0.014729647	0	1.398761291	0	67.19022547	11.89193126	0.720361354
CG14907	1.827362628	1.559844542	6.137883216	5.111308732	4.574998466	8.880824128	21.53915891	9.74149498	2.200817506	0.87379953	5.692227575	12.37736017	9.962924355	5.06086962	6.314392336	5.958182692	1.904491845	6.19807751	11.59868268	9.388013612	5.366715507	1.151575656	1.490374455	1.710360011	1.425446964	1.551976009	3.352696805	1.266998244	2.079239971	3.073038471	2.266158401	2.479076259	3.243072381	5.871757095	6.792583405	6.201623247	3.118565302	4.5140293	8.08222761	6.163548604	3.310642522	3.201934142	4.928460732	0.710167538	4.369400977	2.59309929	1.31521642	0.108846218	1.544461508
CG14949	5.995292641	9.851389216	16.89598436	9.065518883	11.8025887	12.37113202	12.75155689	9.503550907	5.670550569	7.614598471	9.81896171	22.56757848	19.23683812	11.5722606	19.11864975	12.13740278	6.843792972	30.73638259	30.73593484	13.99912524	20.80901126	1.137129505	0	0.452460324	0.237093295	0.09985598	0.052806352	0.009862062	0.110226053	0.097727837	6.509940394	10.57511624	15.69647518	69.14312537	56.343853	55.34409311	2.210388501	2.382832207	0.222772062	0.032373916	15.5433456	0	5.391097916	0	2.031133521	0.179585757	0.151475373	5.000113765	0.063003945
CG14965	1.507562613	1.509668996	2.715123836	2.724198648	0.703936822	5.140180535	14.76262601	9.169162167	4.185252943	3.08598515	4.287242547	6.546839395	1.089909076	0.747131502	0.913826553	11.13378184	6.757167069	7.369068925	5.155010506	0.970229777	0.897498018	1.71072046	0.889263279	0.866024748	0.894150727	1.124244231	0.966845371	1.167086028	1.775375712	2.142444359	0.683842646	1.866545569	1.115969739	0.48750885	1.136642951	0.762390279	1.625772594	1.308071774	26.31109498	21.78487712	3.629484095	7.111103127	1.503593002	0.610075235	5.736777686	0.205826268	3.64158714	1.635351213	1.915365406
CG14968	0.664968781	0.640134134	1.021448972	2.241840203	2.453123276	2.393473086	0.575119452	1.234034514	1.504113362	1.224792488	2.43679548	1.609460587	2.74082382	2.463889706	2.477662678	0.775622992	0.775829649	2.070466523	3.167556355	3.006671777	2.095220136	0.183538218	0.206218848	0.069228213	0.48271657	0.209816076	0.208826103	0.497783993	0.220120833	0.133861573	0.161016709	0.128469369	0.083816984	6.38694709	4.550656228	4.207078481	11.91782617	2.078330665	0.035515716	0.004940591	0.384801747	0.093519289	4.274861127	0	1.812209855	0.537422697	0.507574875	1.912795073	0.337940979
CG14995	19.26087494	17.63678547	216.450473	22.31226258	13.94732012	48.27667622	99.06998949	170.5779227	42.34824656	37.51702564	39.29575802	79.08853019	10.65815826	11.11639314	13.68556572	54.97822358	43.78008065	132.8481624	126.1169277	11.06426797	9.222569647	29.48671166	18.52206504	13.51770225	27.20644051	24.06120062	15.56013696	34.7917851	27.31826769	25.15211124	28.79016784	28.55960385	20.50858479	14.897598	16.00722652	7.173743404	456.2278053	217.8218432	12.51277854	12.98091796	11.19624009	14.4878018	5.766989058	4.637207017	289.7270748	0.739765531	29.4493413	95.76383028	115.2121935
CG15046	0.378399629	0.231663191	1.919345844	1.814359167	0.955312048	1.182357071	1.109741608	0.886315888	1.720811459	1.068921671	1.301960265	1.534707452	2.189439357	3.09207939	1.267206617	0.392741455	0.81921249	1.391358989	1.782859933	2.253832232	1.383434936	1.003686136	1.345152922	1.843275814	3.244210006	1.798469895	2.770691447	2.684837281	2.197180667	2.402901686	2.509786257	1.832156626	3.709760079	0.207157441	0.155868253	0.448767944	0.024656867	0.100977224	0.083660752	0.166204872	3.390659777	0.852329162	1.822869734	1.849641423	1.071514564	0	0.358878409	2.59319256	3.710462702
CG15065	0	0	16.19932712	0	0	0.622134296	0.536120799	10.31510166	0	0.111328866	2.050952122	2.990009919	0	0.072210736	0.073621075	1.030374683	0.577635002	2.346445854	4.872723283	0.141281622	0	2.273530255	12.22697258	24.17098862	2.233429844	3.351771252	15.17739212	3.522963463	22.88220643	30.77100153	4.989814385	12.32688862	22.92158574	1.161190311	1.052974131	0.625769968	0	0.159405926	0	0	0	0	0	0.148698816	0	0	0	0	0
CG15068	0.06148459	0	38.30899861	0	0	8.261728743	21.81841821	62.37548689	0.416872011	0.158637278	1.308578878	10.73129941	0	0.078017212	0.235362884	45.64081165	6.06274509	15.84016428	6.302733472	0.526839219	0	10.81048178	73.16002866	72.02035836	6.393995374	43.44426555	41.72346542	13.76982507	117.3079254	160.8229335	27.17358702	30.33588	69.75143516	4.08030954	1.304009414	4.47338062	0.331888078	0.128329083	0.08377385	0.021985603	1.107029835	0	0.048835939	0.399031226	0	0	0.144373295	0	0
CG15096	7.30895095	5.526209465	21.37381159	14.90324493	19.30479758	14.28378714	5.495776698	4.644442492	7.441757202	4.520028597	15.13587885	10.65551061	34.84154287	19.6618074	23.75325756	14.43442002	5.534527567	28.92957464	28.51264409	19.4058719	20.36334858	39.24931193	113.8271671	149.5366674	51.97945201	67.15040889	224.4357976	70.2632232	127.5296175	173.5626141	56.89901601	72.18990456	102.0361639	158.6855668	114.0568862	129.2259212	16.13697436	30.10730168	0.900600253	0.201041295	21.91662381	0.808545892	5.77791976	0.235550936	2.630007049	0.094026668	0.486390117	0	0.175996481
CG15098	30.05889078	24.32323585	51.57491855	178.231647	87.07143019	79.91172159	84.58133137	42.3059792	23.88574608	17.32802506	67.6632072	84.93304728	143.1983847	77.71193913	172.2579221	89.80669703	20.95106448	89.49611339	120.1414955	143.1922555	87.97882538	34.98002889	65.93958826	121.2908758	37.2655633	60.42521163	214.8501932	59.16963471	81.53221126	128.0390799	45.75153184	69.38492349	112.3838888	115.4649388	83.07322791	96.32196884	68.21684422	89.91785529	75.41285192	49.55869029	63.18676162	31.56840952	219.2538817	128.5995201	61.07498466	63.12095639	25.35478538	85.02298051	203.2415745
CG15127	0.702539015	0.308790055	0.354217651	2.137232818	3.304932982	2.378208318	0.554729658	0	0.114317008	0.054661412	1.782031734	0.742178058	3.534161115	3.236183398	2.042903166	0.224178471	0.724952226	0.617883797	0.228837195	4.989874421	2.921273229	0.046750281	0	0	0	0	0	0	0	0	0.112163344	0.21008943	0	2.997260937	4.152431797	3.686934297	0	0	0.056611888	0	0	0	2.034674525	0	0.25949186	0.143477549	0	0	0
CG15155	5.561234686	4.237230606	4.859103535	48.56888422	49.13034446	25.34931874	0.843976863	0.799412701	2.334869767	2.879493203	18.53089819	2.632008111	30.91576009	37.3089475	4.556517472	0.312240486	2.069123966	6.883302331	10.77118477	45.45601721	24.41445677	0.165763732	0.143793776	0	0.095645083	0.015392905	0.120227077	0.235072755	0.052237792	0.156670398	4.082900968	3.373459618	2.803227135	106.4384314	79.21942455	37.40267106	6.896630879	6.871070647	0.06126908	0.028761413	0.294558153	0	38.33073496	0.126408785	0.898722635	1.128491946	0.208715423	0	0.278055457
CG15201	2.35818677	2.933631036	24.67095356	13.40489957	8.173680887	10.19605196	21.99342783	10.09282335	16.84362104	12.4957769	24.08777176	26.51937731	11.68538845	12.73821894	17.99582038	21.88336013	15.35531339	54.31211571	54.62669008	11.88411454	12.09939431	154.1610556	189.3573309	143.3699446	176.7513978	210.9407475	190.3416618	219.6035243	253.0953414	503.2453396	46.82627502	59.78041283	59.34484011	10.0772908	9.38558236	8.89720818	2.390394074	3.109467258	0.238128525	0.3844826	14.15971145	8.928883657	18.9215078	0.209644316	3.865994071	0	6.89105589	0	0.728643305
CG15247	5.936840011	4.338160421	12.4510973	2.875678668	3.815997283	9.806179509	10.62495383	18.65304468	2.178707855	1.536156469	4.72424831	4.958878372	5.822662304	4.788052519	4.951960702	7.761076498	4.201656332	9.45566936	7.841106814	3.1835833	5.213789697	7.598943484	8.87796293	3.445940257	6.396917036	12.96046173	2.680514696	4.322706026	4.169261579	2.230575619	10.56773741	14.30203917	8.352867294	1.159162047	2.070852861	1.03311844	0.551090445	0.725559758	0.107595062	0.090866176	4.38762732	0.071509349	0.761283138	1.165344328	0.30975341	0.02160624	0.32263619	1.424691866	0.583671466
CG15263	0	0	0	0	0	0.200405472	0	0	0.039998188	0.047657733	0.266722622	0.242997497	0	0.018506803	0	3.41018076	1.242993439	6.297149144	13.61248755	0	0	0	0	0	0	0	0	0.02208501	0	0	0.01968624	0.073428029	0.580917979	1.598786802	2.971368442	10.77985241	0	0	0	0	0	0	0	0	0.013395728	0	0	0	0
CG15347	52.78919454	41.52008281	30.39651208	48.46356523	107.7213998	73.31146695	45.92295566	13.23121395	26.20731523	19.08674278	47.34306982	58.00072804	150.4656606	145.2215564	88.1902484	23.50973249	21.38446965	41.1780893	65.05345534	172.7887718	224.7655894	1.146309386	1.122993244	5.300328498	2.936956186	0.810320653	7.142172919	1.572694571	2.46516498	8.110167148	4.859422019	3.355484853	10.77445783	222.3101443	115.6127947	203.5010402	24.7063449	14.33606764	4.843361966	6.140437152	0.809828929	0.423177923	114.9652148	1.470508609	20.14651817	1.072803189	0.935995991	22.87417498	3.641407436
CG15412	1.353147562	1.123290335	4.216473324	1.732988754	1.853375257	3.471111078	5.99486053	3.668725487	1.034888315	0.406809166	5.414474287	10.23997062	2.852601012	2.273624925	5.197719605	4.390852913	1.870181899	10.33418082	20.83617944	1.62370083	3.828368856	2.83887031	3.535122058	2.434781961	2.431944819	5.722350347	4.211284347	4.866202037	3.747473851	4.515132162	12.90345874	10.30221535	5.517650871	0.333404314	0.782538064	0.351517141	1.22039241	0.179705275	0.095612346	0.011542215	1.264951562	0.087836628	0	0	0.109213159	0	0.248440425	0	0
CG15422	9.468173622	15.34231841	4.913422389	21.0354828	30.2419145	14.76209833	3.031380787	5.966520522	3.861421178	3.610330864	11.70694888	10.57094088	30.91107488	20.1620066	30.58571928	3.77055915	1.981363701	3.521290264	13.74505859	35.69324222	30.4564057	0.117777532	0	0	0.030311822	0	0	0	0.107305629	0.027317219	0.650099368	0.04519836	0.787889305	42.89796484	30.24539554	34.28621327	0.499288606	1.10927557	0.037018985	0.003526992	0.109582845	0.068548179	51.37713745	0.023510488	4.446887408	1.32259787	0.2196545	0	0.136302807
CG15423	18.61799434	23.92961902	6.028327083	34.90298013	76.86094605	45.97711784	31.80559737	3.597722937	9.446949559	6.922776051	43.58880095	32.44267242	95.02925317	82.14531048	53.64866116	7.54462415	8.428054349	10.57440936	15.36124927	91.54839235	114.1997937	0.316695199	0	0	0.145300489	0.008504027	0	0	0	0	0.279341754	0.387461633	1.887164029	100.3670042	79.59686514	83.39149066	1.836149776	1.722575334	0.140991376	0.156836945	0.63281609	0	103.1305277	0	14.49424374	2.90711001	0	0	0.294542469
CG15531	3.021475792	1.661303921	15.91113777	11.33268567	9.267623275	6.11597607	3.055288751	2.165625213	2.490940405	3.509400156	15.72427691	16.70676557	7.122997619	9.220371146	5.433200368	6.108910821	2.722569499	19.38663238	25.08840007	6.950578812	5.777541585	0.096323043	0.316176435	0.550817845	0.35601918	0.075314745	1.122068234	0.204593868	0.332238737	0.672798956	58.16635787	69.50039505	82.86870867	2.35261365	2.540437459	2.586771691	2.77067323	7.283085692	0.259840711	0.0227889	16.52156527	0.207834195	0.221714878	0.143309403	0.215513742	0.035940574	0.341967749	5.697501909	0.157053457
CG15533	18.03691526	12.89247929	7.977902292	5.740892985	33.26586722	33.40732511	4.921464904	0.356064135	2.591729593	4.706194129	22.72293539	3.099982749	56.3178123	35.43081239	67.0199587	4.425408048	4.19521996	8.917796902	25.11332284	105.1407284	139.9575385	0.145464003	0	0.027080087	0.149066563	0.004412591	0.020902549	0.008548573	0.043917685	0	0.802706273	0.675678594	1.0350993	123.5889523	108.5084461	93.20062211	7.864878388	10.39966859	0	0.002165776	0.116677749	0	29.97766421	0.125377498	17.8335289	0.040849816	0	0	0
CG15534	25.07676942	19.05734743	11.32463453	18.22800925	61.4110417	61.06592346	1.626407794	0.883989295	5.359688845	5.740843046	43.77997847	4.916179421	103.9798379	82.52903807	56.15310263	7.59563869	5.542252083	25.66502863	37.63444357	100.3838792	110.641974	0.235394687	0	0.027055046	0.773287908	0.116397221	0.016706576	0.017327221	0.007493653	0	0.791523344	0.773117112	1.015265332	223.5334207	161.1792942	169.10504	11.43334396	16.43845552	0	0.00219856	0.270455061	0.031024864	30.50534044	0	3.997970122	0.142326137	0.009562387	0.097986561	0
CG15546	1.868636502	3.442774001	3.58006339	5.057220182	3.498742078	4.288916451	1.806635014	3.776122914	0.764942057	0.581492605	2.887790616	2.95576856	7.000544498	4.043888217	5.64957414	3.103613847	1.543919693	4.963841488	5.490617272	4.48386533	4.663580792	7.648713944	2.531080863	3.022583798	15.555598	5.62306727	4.949372831	19.45438675	5.412911568	6.577636634	18.39557778	7.913857314	8.664686697	0.88146352	1.08665648	0.705512879	0.027310339	0.295357692	0	0.014760647	8.699282904	0.216632114	0	0.482097104	1.007659784	0.105614873	0.07822347	0	0
CG15553	0.065575541	0.01820863	0.382187433	0.071156851	0.273624637	0.011830635	0.022306094	0.038567084	0.017866373	0.197131408	0.115707884	0.091483576	0.092113983	0.037227556	0.359678066	0.092153009	0	0.414155181	0.305777281	0.165802226	0.019731677	0.289735389	0.224497093	1.071167596	0.546902238	0.415208498	0.95650907	0.817967013	0.310180333	1.642895337	0.520203453	0.458605772	0.223738994	0	0	0	0.922911405	0.310411006	0	0.002600223	0.045737024	0	0.018811984	0.118057344	2.13929091	0.011021951	0.041061159	0	0.275465444
CG15570	0.009333359	0.098385386	2.873053956	0.009662487	0.020635577	0.109148139	0.057252542	0.924942336	25.84465603	21.03841935	23.78260704	32.68396435	0.02213281	0.103251397	0.002689039	0.05240101	12.02916652	4.081683308	0.177537234	0.037127845	0.040654453	0.024568202	0.008863043	0	0.030457619	0.129026062	0.010611211	0.025021743	0.011402087	0.043256237	1.421264317	8.399203634	4.842057404	2.819645842	2.455688151	1.593598565	1.110770496	0.153149016	12.2672792	41.48692616	0.102135436	0.01974319	0.013519121	0.004073463	0.197535994	0	0.007337188	0	0
CG15571	0	0	0.684044179	0	0	0	0.03930465	0.886764454	3.808349592	3.716503535	7.995929799	9.399446685	0	0	0	0.041064745	3.628982821	1.155768529	0	0	0	0	0	0	0	0.082125242	0	0	0	0	0.569979018	5.962260414	4.604966403	3.427471733	1.568252664	1.764841542	0.009559443	0	12.59557108	36.29693495	0	0	0	0	0.080289395	0	0	0	0
CG15617	0	0	2.98400964	0	0	0.056439752	1.750584326	1.832935726	3.315541367	0.675594663	6.383417664	5.568593252	0	0	0	2.089751202	1.306514064	5.104971873	6.174445733	0	0	0	0	0	0.597968949	0.013232853	0	0.034700129	0	0.015368631	60.00802823	25.52035284	7.257490471	0.414671071	0.167144621	0.063385159	0.024299904	1.303824025	0	0	0.210240654	0	0.014757821	0	0.075293748	0.035346929	0.048161252	0	0
CG15630	0.261044636	0.304557423	1.598908166	1.273745261	0.633934265	0.733240102	1.325827494	0.233944905	2.129810981	2.015267994	0.714382828	1.685987095	0.490833623	0.474295702	0.414255622	0.654689646	1.571863413	2.526645599	2.196373139	0.705283007	0.931350211	11.1548764	9.360550211	10.48869159	14.2232509	12.26572997	13.69302596	21.03524795	16.46242202	17.01783736	0.679418954	0.58563107	1.079347561	0.059884934	0.107988971	0.099081319	0.329111657	0.664364135	0	0.007150126	3.237553259	10.23751041	0.147642685	0	1.116941049	0	19.88537094	5.232626008	0.468390095
CG15661	0.151938351	0.234391738	5.132732748	0.299248174	1.21429473	2.738507182	3.98092745	4.021013697	0.067354285	0.190789955	2.121329514	4.28334608	5.075453527	1.246913833	3.476717706	5.04853886	1.237570534	5.764772511	10.74584872	1.226225624	1.486984905	9.472176283	12.65461118	18.39648529	7.975478521	9.500391251	20.81364291	8.106170439	9.285229066	20.36477696	6.651323569	7.573174502	6.105831911	8.588243613	4.967843263	3.68672148	0.066770248	1.330276887	0.288063806	0.271563445	0.092448213	0.017351296	0.099885256	0	0.071048794	0.011415975	0.021816854	0	0
CG15695	6.288569457	1.677378937	19.46276016	6.699873261	5.05824501	10.43603375	6.938452364	8.823546415	2.224011225	2.474875386	7.395074051	5.846463394	8.229973895	8.729882478	9.617366983	2.272740789	2.826951448	7.918291931	9.35243535	22.61970651	14.82677712	3.097234717	5.27206009	4.341303182	5.923770166	4.373319217	3.755972387	3.322641302	5.181910767	6.209527516	5.350753657	4.583436622	4.479137964	26.70154489	26.02163487	41.96992672	15.85514556	78.37175315	0.1590885	0.078969494	0.169294257	0.16127166	15.54360227	0.080384263	8.944973203	0.18702825	0.235317596	3.766797446	0.925726598
CG15721	0.009919258	0	14.45056015	0	0.034946212	4.152751674	22.68072673	23.02839456	28.21432254	19.23211356	23.09126911	22.79373977	0.005574148	0.028381216	0	25.08629056	52.94957663	44.46080747	9.863860891	0.018469218	0	0.155714904	0	0.087583395	0.02330896	0.244359585	0.10428428	0.032709344	0	0.099732351	1.99529301	10.17346584	8.874097347	0.071484714	7.154225056	2.921362653	0.01669026	0.336979941	40.87379266	88.59901667	0.008565464	0	0	0	0.032977689	0	0	0	0.016590225
CG15803	0.005558217	0.311831491	2.023703923	0.062604865	0.186903492	0.777881704	1.176064164	2.033480921	1.174475499	0.806200301	0.433778756	0.657204854	0.283154181	0.111813865	0.169936419	1.08742923	0.821323875	1.497394594	1.548262839	0.172434104	0.061215197	6.150423382	5.500448103	3.744560942	6.657114242	7.247140162	3.574306663	10.44045385	9.920689954	7.823233623	1.130110306	1.082749238	0.962086887	1.041626473	1.36465972	0.78197482	0.40956453	1.291599811	0.019031278	0.004545673	0.42321609	2.98563491	0.148803953	0	0.31521968	0	20.44463181	3.52772639	0.127508389
CG15818	46.11999592	81.95338617	27.5551395	199.3899562	55.92005073	59.11459573	7.351116212	24.37895578	64.9772345	93.55109675	47.24876783	2.353692903	138.1887803	80.50400169	130.6555439	7.108244239	51.92393785	6.29026353	6.586190543	189.6601539	66.74071548	0.007027072	0.056808257	0.054998853	0.117083632	0.014673276	0	0.357169696	0.274136338	0.374019541	0.141221066	0.151435685	0.830631256	41.11952345	38.11086451	44.85425414	0.24692981	1.694862469	0.09542357	0.007166242	14.67341154	9.380404107	1497.316141	0.129863178	50.03086879	17.56893387	0.452045751	0	36.78144509
CG15879	0.350572616	0.649039661	0.401580054	2.851902574	3.575696253	1.737826091	0.604286334	0	0.172967639	0.066511726	1.870859873	1.28237357	7.059402369	2.181631518	3.637807907	0.71690748	0	0.535862499	0.925619197	3.910420086	2.854848435	0.057427915	0.306816831	0.466516689	0.340798392	0.203910713	0.681017075	0.161516885	0.562215363	0.771660533	0.451411291	0.722850501	0.63589337	3.664907655	2.11980531	2.091522216	0	0.442737174	0.234781341	0.119445374	0.734416928	0.116605419	1.332797731	0.752625004	0.607572049	0.535871652	0.091148749	1.369490223	0.128120911
CG1648	100.0933009	58.58497904	115.709441	55.91667318	88.72396283	55.63949739	35.85086936	48.42889044	74.16934634	52.40412599	86.30273312	69.42567476	84.12075803	81.41694566	72.66772472	55.26604267	46.83389726	129.2279577	210.6668397	70.09817775	76.15293206	172.8768946	161.4403963	179.3222895	124.8150351	162.1133657	172.2076223	160.3486852	206.9892378	223.7543925	218.8298242	259.1037877	336.2360233	36.66890454	36.58596619	28.07251824	117.7892416	484.5230595	9.630351933	5.570279162	75.03293803	53.88277743	18.03493655	51.77542237	40.72882265	3.21939124	34.54296836	31.96296702	5.405508136
CG16713	7.327478714	0.030456988	30.83545939	18.82844995	33.36481241	27.5684299	8.728898797	31.0204535	3.206614547	1.215049633	19.56246831	10.78297076	82.89196623	41.49856605	51.90889974	9.110955194	3.08460892	12.96994548	15.90155047	41.10508848	14.65248484	27.35290708	26.68553228	39.99231261	21.70961242	18.80685745	48.30119874	19.95454272	22.21859124	45.28970201	53.35656104	40.60815844	68.39519851	38.87724052	28.34054196	32.91832974	8.530246667	15.52821245	0.331256081	0.043271191	2.472497948	0.182881733	2.275815869	71.50024642	1.550270896	1.778663193	0.063775843	0	23.31198176
CG16723	0	0	0.421732222	1.122872838	0.452081168	0.262597803	0.038396455	0	0.419753812	0.050047729	0.26029966	0.168697863	1.055886313	0.426651947	0.429903037	0.023731723	0	0.066151469	0.116408801	1.235692518	0.230519247	0	0	0	0	0	0.034384189	0.019348069	0	0	0.004031666	0	0	1.861564494	1.168940847	1.306671409	0.075795158	0	0.017296578	0	0.010961998	0	5.972052285	0	0.344949718	0.099091021	0	0	0.171208426
CG1673	20.03817869	22.85183767	48.480118	30.37638727	45.14412567	77.63870927	100.8739148	53.20421455	10.13122836	5.475351156	39.4504832	55.06904442	25.65798255	38.3872493	46.65831099	143.1013489	13.45169656	36.78803542	58.44511528	72.13818816	66.25334455	37.38134804	134.2305646	58.53771712	56.30104183	31.96123409	56.46668846	35.28959425	67.4824359	51.01568687	115.1882606	127.2358652	147.9243619	16.82440031	14.03779139	13.42336885	4.210843804	3.271280426	11.9676842	11.42551098	36.44903445	5.252397639	3.779483877	23.75477502	11.59364559	3.368600726	1.383710428	3.625090916	7.573224118
CG1674	14.48723909	18.62284079	16.73524046	61.42296614	30.62524969	32.22593859	7.38147618	15.89996423	2.237648759	1.781029872	23.06872154	6.202007425	53.29036186	37.52291157	64.97709397	8.130107787	3.886389133	13.11779359	9.028178909	51.34825754	24.07401324	15.31967899	6.04727854	4.157914258	15.8881946	8.50261013	4.593617477	13.89000859	7.479531295	7.743409347	49.24407251	30.94716232	15.65762354	2.585119489	2.437442598	1.317776263	0.121862904	0.900186172	0.22882945	0.148409364	30.27649751	2.483822704	2.093447063	0.041140698	0.52735444	0.222079926	4.660264698	9.751558561	0.372892976
CG16749	65.72019663	76.0587863	9.539070339	29.57038636	129.81291	53.24912158	2.329955075	2.337253572	14.7020036	11.50261508	44.8721195	7.601858499	70.75812909	73.25224111	71.07869389	3.790658081	14.18632976	11.87990273	16.18576903	85.30225327	96.68736813	0.63025687	0.574392744	0.503405575	0.772845424	0.480588024	0.81558652	0.754910034	1.013140873	1.474880091	0.553844797	0.82964982	0.918635976	225.2558007	137.2778015	142.3915974	10.15523923	7.737936292	0.305037148	0.613053897	0.783036363	1.173106962	41.21164394	0.077072334	18.43970177	2.252252974	1.71491308	2.123214206	0.158570498
CG16758	20.55580139	23.56424174	56.47268941	53.91591082	26.19043655	54.49801421	56.00575105	43.5050336	40.68235174	34.27869053	32.19561249	60.66185505	25.19084118	30.88326701	48.44023739	77.26756696	46.89475887	44.07024069	69.94308845	41.4346782	43.83909488	65.45605521	159.1349416	122.2019711	62.10160541	62.83473015	112.6428304	177.9233918	236.8806175	355.3303018	139.0437156	137.8603834	137.7788644	18.44276736	11.23623384	9.348679966	408.4129266	68.61801946	0.579875793	0.34769524	8.580277794	2.049222551	7.390250574	164.966766	57.05105577	1.855128264	12.32179779	32.56491315	516.2627439
CG16772	0.277537847	2.369579771	135.2236587	0.301352718	10.08658935	8.893353268	26.52731136	24.19634307	161.665985	66.8750729	40.67865081	58.98265558	0.98443821	8.279789193	3.765133124	86.62584546	65.39456099	84.6075106	56.51822864	3.356743049	6.607217615	321.786683	321.2151948	2572.479131	451.6120474	406.8357821	1965.519322	482.1268058	700.7696166	791.662872	1198.229144	980.4680985	3431.822811	57.71599095	32.72255686	63.2127185	86.8393191	76.15306745	3.153691419	0.478631599	19.24025675	0.13769308	1.485835654	9.973767965	1.15186051	0.062495364	2.01133287	22.52578017	0.541316573
CG16791	3.896566313	4.471218438	5.843534754	4.608597878	3.340739496	2.726882547	3.191503305	2.928719475	8.513677682	8.317230278	3.135277359	3.753584725	2.093169774	2.610540565	2.575739146	1.927462592	6.138640646	3.17869045	5.400073859	2.62326387	2.146829564	11.97913189	12.08069856	9.218618581	15.00082891	13.9863914	9.945812469	22.6214228	20.73352665	19.5044924	3.483240719	3.004758742	2.773471048	3.216031568	3.648004287	5.259567189	2.522071507	5.508011771	0.527435866	0.481303197	13.56603245	39.46309994	28.39687144	2.268699264	14.06533641	1.412669955	45.52851448	9.775667383	8.396927076
CG16836	0	0	18.19833696	1.353242917	1.7159554	6.507533321	10.42880969	1.443711611	0.373376087	2.608320419	4.733557073	8.521943693	0.555461853	2.17129756	2.357429209	20.28162058	2.178501517	12.65494646	9.160816165	0.257475853	0.04188115	14.39115431	17.1633976	50.59243458	23.93355037	25.12391806	57.54267912	18.99273406	22.73657273	79.35555709	27.95946325	14.32049653	50.0842868	8.163508134	1.313955946	1.869923233	0	0.442550243	0.058370888	0	1.313814717	0	0.060088698	0.801717454	0.048117415	0	0.130730543	0	0.200640101
CG16898	2.82410094	1.62984335	12.90581506	16.48500484	10.89481684	29.17080262	65.33910596	19.65960259	2.518712393	4.525114615	16.59423443	33.28167102	66.25119172	29.30483153	42.32665675	34.81240307	6.827898797	20.09945612	132.8128003	20.6420054	26.11579589	11.69357913	4.896004659	11.36374264	9.619650315	6.741436594	16.29165099	13.7264543	8.987419087	18.82001806	14.26038631	7.72070891	10.76701813	50.46462194	53.19001583	45.4503537	7.900138035	8.446337039	0.042042756	0.213099667	0.052944567	0.02529327	7.097739584	4.25138161	0.877036701	0.198044488	0.044431038	0	0.10313398
CG16904	0.360768553	0.015864991	17.84378228	0.319704225	0.621981909	2.087797127	3.646625844	1.843349221	2.764376383	3.090273468	11.66398098	20.48434365	0.601957273	1.453407326	0.304429449	11.23151872	5.664350085	33.1964163	40.89005986	0.1922664	0.128546765	0.202036331	0.150198972	0.210197615	0.635874361	0.007780928	0.534587325	0	0.215354951	0.581088455	60.43924892	89.93496516	79.01117222	2.882346088	2.348776761	2.731846384	12.52220287	2.926159829	0.415297579	0.023556882	0.109594906	0	0.00768465	0	4.251184945	0	0.033437852	1.736118864	0.213754232
CG1695	0.24403518	0.402048991	3.686215855	0.718524428	0.46544396	1.071538595	2.064215465	3.068951304	1.801405506	1.301877489	0.363863906	1.721060551	0.21201326	0.253923952	0.48274482	0.892873355	1.31889717	1.75669338	2.375107445	0.455636737	0.375838935	10.93593789	12.06912812	9.005843907	10.8151478	11.46823441	8.611052063	17.67574868	20.43189465	16.48013651	1.196931511	1.06053578	1.366834898	1.150923012	0.467210946	0.71060885	0.176248985	0.585402408	0.02165948	0.025903274	1.557553086	10.56221462	1.319770112	0.041447227	0.639800002	0	9.312707691	1.677247995	0.596589596
CG16978	0	0	6.301152071	0	0	1.150808387	7.437538924	0.330892855	6.498675979	2.022617367	3.702019305	9.331741311	0.013286138	0	0	1.814599072	1.439895486	9.778152571	15.76660194	0	0	22.01199327	30.23008477	11.76911347	24.1287406	19.19460383	15.43621003	30.84319473	53.34290288	72.01740738	30.38077391	19.1292147	13.74070346	1.797727184	0.116674135	0.66379027	0.184704229	0	0	0.024267653	0.173158113	0	0	0	0	0	0.265598129	0	0
CG17002	4.619029807	3.395433385	5.172597928	3.412367991	8.449773144	7.244769152	14.49269958	10.73502229	11.33916586	5.218788116	11.34425127	22.83879303	3.276820418	4.966568088	3.929414136	15.56869287	6.165817126	13.74060299	17.72915796	3.020462795	5.230655259	4.888580715	5.033808599	6.539861411	4.349347516	3.734577989	5.193475579	5.327941	7.809584309	9.061391353	3.750278343	5.482442677	5.551128948	3.343573678	4.115574612	5.520533679	13.38146409	9.029770355	23.6510849	20.30729577	10.45547206	17.63494062	4.366292016	1.796417853	25.57971783	0.758560373	7.088744406	2.506520429	6.053386887
CG17108	80.91234518	78.29371093	103.9964371	15.57808159	45.34996479	46.68914043	27.7173991	12.01159478	130.3823535	91.01919542	65.08610308	65.74140222	25.99640344	44.96822879	21.45298607	98.40550146	68.01741285	112.298858	115.6407528	22.34618741	59.38295621	197.7536846	1140.766495	1350.126094	78.20624341	456.8661995	565.8856071	565.2182767	1218.093793	1616.300569	500.6746505	632.6061927	891.7744677	39.62807673	67.56975299	53.5973539	7.782002868	12.5371994	0.931507032	0.360003482	85.10167504	3.444629412	35.37950471	7.415599248	14.88209437	2.237568979	2.083729709	0.737860806	0.56671406
CG17127	0	0.260268804	0.441700499	0	0	0.080089864	1.435538076	1.075824814	6.523024301	2.958493828	0.200041729	0.162263614	0	0	0	0.257865266	2.136411136	1.972720617	2.631146945	0	0	0.728806421	0.573727523	2.83973647	1.390948913	1.442760064	1.787224111	1.810077589	0.798990299	1.831596896	2.779807265	1.94220962	2.40585488	0	0.101062094	0.35652417	0	0.763581583	0.458854	0.867820238	0	0	0	0.376574924	2.112944496	0	65.24309113	247.6244402	0
CG17190	2.844933743	6.251386527	1.679001364	8.338983872	16.62448854	6.384421003	0.58148073	0.624622065	3.260421075	2.564246442	6.319877961	2.310099038	9.148964357	10.83975813	7.105003402	0.79016581	2.209247953	4.950539091	5.24521178	8.625836875	13.91501296	2.654860276	1.282354108	0.970565111	1.848017601	2.172535684	2.419046529	4.195287598	3.657568892	4.369799121	4.143629902	3.827869166	4.79838287	6.194739494	3.649106187	3.101860072	3.44456369	1.091414282	0.492227014	0.339945446	5.185446234	0.900062451	7.901988612	0.207003461	0.283572387	0	0	0	0.481652153
CG17224	3.714266082	6.090377641	19.48279911	21.09557709	15.73688861	6.966284567	9.063897923	11.16690882	5.603631362	7.271423428	9.671338387	8.644971319	12.26275538	9.052208544	13.08500792	8.688379172	5.943482687	13.50265411	15.94991612	13.03458352	7.869316483	4.69263818	17.00933653	24.8440488	3.811604792	16.00435541	38.37661767	10.12228817	20.34407009	35.46992385	14.8632563	21.30852108	35.17050289	48.37597865	38.98632235	44.30757339	24.91252927	5.582914967	1.654415758	1.128160671	3.871963891	1.87340444	37.95052662	8.650116186	4.20408517	3.211537373	6.458999476	45.24583165	41.16623481
CG17234	0	0	0.941837436	0.025256109	0.014414848	0.793623307	0.821391991	0.257302714	0.089690578	0	1.825134698	1.81799214	0	0.041634644	0	7.234593308	0.555409513	1.541026545	0.238387074	0	0	0	0	0	0.109057425	0	0	0.015411401	0	0	7.451170972	8.993730195	7.885290346	6.827748819	2.024554235	1.492829571	0	0	0	0	0	0	0	0	0.012603582	0	0	0	0
CG17278	4.69433415	7.760598677	12.24064791	16.98481731	10.99198935	12.00757043	11.54174645	5.841359055	5.804247706	5.637555982	9.731270633	8.773120864	15.96896937	14.90737899	9.400768734	12.38385775	5.102952099	9.787975783	20.03559933	10.32809202	10.12374967	15.27894894	16.24746623	24.42133278	18.08138344	13.782737	20.40405916	15.90100451	17.94352896	19.57963678	18.99964105	24.24712176	30.05174647	5.958781518	4.813033589	4.996618814	1.633238878	4.951771142	0.364958413	0.170608691	20.53008508	7.381569496	3.861679085	12.4911848	41.82415662	0.461640532	2.35342522	12.45775206	79.96166985
CG1732	0.467915847	0.262171101	1.727278634	3.394318008	1.069265437	0.412240786	1.167970602	1.9380408	0.86769353	1.131700422	0.529391311	0.59190223	1.046203956	0.854423617	1.727564568	0.990460403	0.593275641	3.074835875	2.283376859	2.231594334	0.288575527	10.66098238	9.062406645	4.635875521	20.62732271	6.097496321	7.579869875	24.11691297	19.92766088	13.03463638	4.099250208	3.770293241	1.82882405	0.090688257	0.06111914	0.087430388	0.015452406	0.542889733	0.087543076	0.008450293	0.708146695	3.510109227	0.09225211	3.407039728	0.927921826	0.134629379	45.96989023	1.198729192	0.836139073
CG17322	0.180222335	0.81122744	5.568698288	3.338682194	2.059488417	7.745287299	23.74533284	7.209366656	3.014248774	1.944787306	9.5013689	20.63296826	3.18846312	2.936440467	2.517609807	17.00672533	5.853442674	11.41254118	17.71734284	2.572527452	1.944857201	3.427523565	11.22134246	20.58967744	10.49598609	12.02183794	31.03948889	11.25470052	18.96848074	37.81848251	6.792624321	10.11268046	15.14962181	3.938490655	5.104894019	2.998662791	1.995143908	3.602071166	50.0125666	36.12058599	3.375303646	0.39959962	2.209276686	4.699772421	0.243757369	0.080812079	0.974972252	1.597919028	2.551899655
CG17323	0.870517771	1.535846437	3.548510066	13.9809037	1.88474305	1.454244504	1.595210021	0.746970881	4.141243368	3.534716555	2.484120078	3.304898413	3.638244674	1.946011491	1.452827325	2.109525214	4.075578379	4.128009175	4.550958791	3.223109465	1.8916026	2.076730519	1.997377172	2.471839018	2.482935996	1.696727027	3.281192626	3.64936722	2.693448718	2.894716055	8.656840077	7.323714024	7.906022513	0.713265034	0.736233077	0.45920106	3.2269599	1.69955738	0.765822501	0.753379873	17.72752505	1.923002935	4.603666668	10.08296565	3.27768448	0.595108469	0.760690537	8.756595164	78.32266786
CG17352	1.229509623	1.629251542	4.056492252	0.366563069	0.734750325	5.178036022	7.726120365	2.831540557	4.532290007	2.858159538	10.78435415	17.50105986	1.707014366	1.32078243	0.83854685	2.927441086	2.464322498	5.360908781	14.05400142	1.244298965	1.296423448	32.70340368	42.73016333	47.64823614	38.20243514	46.78980909	55.6725829	53.86027575	59.71339791	71.39172561	0.748519506	1.069742003	1.39156944	1.158574697	1.561235755	1.152245238	0.757158457	0.269046311	0.714338684	0.448995095	1.194134105	0.47922244	0.195224719	1.019661166	1.181671165	0.027450279	1.407968027	0.438607029	0.381584034
CG17364	0.658495681	0.1772012	0.728696114	0.097295632	0.118038986	0.374808581	0.219867181	0.400060682	0.80518625	0.948789409	0.505809549	0.450361221	0.356688459	0.292274708	0.216009722	0.377538993	0.451263745	0.540832459	1.264072962	0.131985423	0.126656906	3.825984161	3.276119527	2.541375432	3.871805533	3.738799561	3.059359952	6.598954818	5.856179617	4.217637011	2.163452006	1.610360782	0.903269156	0.010262749	0.062473325	0	0.000313543	0.110151815	0.002894721	0.002286396	0.13237553	0.644936376	0.003057311	0	0.134673742	0.041015594	8.476441054	0.330235177	0.024352873
CG1737	3.681317989	3.016320899	4.357199563	3.409182042	4.178701742	12.47771158	25.74482191	7.961947141	7.779902217	6.284691258	17.07982468	40.48508798	3.193259654	4.743149695	2.985753659	23.80445376	7.946971079	20.67123339	24.53558269	3.67533205	4.249502348	3.590185491	4.585431177	4.421646693	4.726666846	5.430663451	5.545574564	5.2074733	6.202814652	7.246716435	3.848940584	4.790925666	4.854516612	2.603494891	4.310371938	4.1427696	1.068728018	4.545227043	45.80341517	32.52584563	9.531827722	17.39936961	3.776392538	1.214008323	11.5617262	1.050045698	6.553712061	3.070330948	4.629096414
CG17470	11.47763292	19.40797087	56.34544928	11.43624693	5.951640253	16.82842008	38.69869963	19.65854277	42.47817073	38.34512827	18.02625275	54.77453302	2.535430075	4.570341252	5.535090308	19.18573557	37.76562763	54.75344414	76.61062078	5.121346818	3.525793599	0.057274426	0.146006123	0.116228582	0.057279745	0.069623213	0	0.564165151	0.196648206	0.237456112	1.012905119	2.85346287	3.286523465	4.557019138	4.431574582	2.022123051	1195.624099	140.5949516	2.256945278	2.657912812	1.270376605	1.418036672	1.136075993	2.616484112	139.0878592	1.06176181	3.443507595	73.40946955	36.25254918
CG17475	48.6595943	12.74669008	4.062113776	24.09098967	73.99166237	40.65117198	2.696659214	1.487681427	2.923777754	2.857210787	34.25235949	8.884223273	66.61113908	82.65578141	31.71497088	2.850513797	3.819795217	13.33855845	22.31317528	51.52296962	56.42331407	0.186130003	0	0.028335825	0.168952665	0.018930061	0	0	0	0	0.297711056	0.696808051	1.349833989	110.6459051	60.78792022	47.27651282	7.594367673	6.315427753	0	0	0	0	13.8721514	0	8.209853956	0.26971924	0.062801993	0	0
CG17549	115.5680142	88.26376616	82.99243979	174.4694346	207.9247927	105.2895833	32.38125999	38.25402752	35.1141804	25.02286612	102.3463532	54.10198875	171.0726646	140.4070584	228.2194037	62.56309126	28.11503968	71.31306943	88.81965177	138.0011646	154.7607347	165.3799083	196.0744085	304.3278164	147.6448836	252.4489049	342.9495736	174.82161	161.6687033	266.0975082	112.4597856	134.371982	234.1812144	35.05704806	34.61387308	32.29598466	115.190879	508.0583656	1.344172327	0.417548547	260.4227705	20.78915702	27.42783797	78.03977329	17.86657872	3.405881689	0.928616525	5.641001244	4.590611354
CG17560	0.237013822	0.342495732	99.87745114	0.251868151	1.642436095	14.67007513	39.67286592	28.39464508	6.424771593	6.22922196	21.61922475	54.81483405	3.060381224	3.106354192	1.441751567	44.35910202	10.45035989	56.79822723	88.33462455	1.71688503	3.281113013	0.266562374	0.431144554	1.530862071	0.99124654	0.224418282	3.680142362	0.477068661	0.302777461	1.445218788	142.1263515	241.3021509	228.6867647	4.905691913	6.040840459	5.376296973	3.542510209	2.578511782	0.869180629	0.050342089	2.111067754	0	0.022793076	0	0.022248719	0	0.142345425	1.170676532	0
CG17562	2.915972874	1.513710242	7.528229654	4.855237205	3.956854493	1.031234834	2.042081931	1.03238272	0.599918805	1.009400393	4.573949527	4.75417769	2.133212837	2.103350663	3.419401566	3.058056393	0.912628986	9.082214176	4.598395936	3.878356234	2.706494959	0.006552164	0.052660367	0.113655911	0.067575907	0.002132474	0.094764706	0.004383059	0.075444412	0.334727189	19.41577374	28.22513301	26.37560478	0.828334614	0.663339667	0.717361076	2.355809148	1.478180311	0.087872303	0	5.660035438	0.087798455	0.01665643	0	1.003943399	0	0	1.160423204	0.323736985
CG17570	1.034910457	3.132055119	0.353564132	4.071930509	3.877869085	1.561611714	0.830560717	0.121559166	0.169215423	0.661507407	1.648785738	0.708512886	6.393221595	3.157714003	2.295735546	0.030672342	0.205851082	0.527202771	0.276902736	5.086978709	5.579246556	0	0.023467508	0	0	0	0	0	0	0	0	0.017418081	0.200614532	0.764400953	1.117140837	1.661550027	0.060179918	0	0	0.227977124	0.017731897	0	6.166018678	0	0.359326865	0.06233405	0	0	0.070876449
CG17633	616.2888981	531.8667313	110.8719945	495.4788321	1292.268397	648.903172	3.044318256	16.34951403	140.9139336	126.420174	722.0583191	133.8322688	945.3708731	1218.160639	969.3532611	37.45265566	152.7234148	242.0332157	93.76975519	993.9793033	1215.644235	1.825906711	0	0.911718354	4.618336668	0.023330939	0.600024322	0.183570545	0.100819962	0.119886529	9.17689364	15.79317031	24.04615259	2545.541917	1473.066997	1604.11282	37.42888591	34.54859293	0.026999389	0.01792555	2.443219162	0	392.7167746	0.568170511	182.300759	8.29201093	0.773703344	1.523225828	0.131165485
CG17636	1.393965135	1.378439488	0.873343897	5.208334258	9.300738487	5.814040883	0.376927777	0.034696795	0.353721189	0.324655555	4.880761588	0.278829019	15.11182524	5.280215616	17.69652451	0.367291347	0.330409402	1.301771927	1.352046351	13.87794908	6.138082664	0.018965271	0	0.065524801	0	0	0.063501786	0	0.028078237	0.044486668	0.023630093	0.078900986	0.237892379	1.315079046	2.227080775	3.174903406	4.777396323	0.656654208	0.162746639	0.158632784	0.3070266	0.029768575	9.45211655	0	2.408755966	0.743376798	0	0.803686592	0.310948119
CG17646	1.161118534	2.910103836	11.70912635	3.188040171	3.276117567	4.179369297	10.71817257	8.5587806	4.113501072	5.004663288	7.184622854	10.51674244	3.0202154	2.87045452	2.181595762	9.547001754	4.299074208	14.67827676	8.745448271	2.809880834	2.296725034	17.68578414	14.9486533	37.64861996	16.17326408	13.85781195	41.13456093	17.11334834	29.90431518	52.00406624	29.21391226	38.20659748	46.18718833	6.311380128	5.831130336	6.531988489	2.243817023	2.057134437	2.932327417	2.592913811	9.972263542	4.606714368	5.040895409	0.167240793	1.214683716	1.390260496	6.537456557	3.603103072	1.187281758
CG17650	0.715299282	0.034507042	0.706523855	2.748739726	1.631249205	3.051566442	1.951538645	0	0	0.090495093	1.265940907	0.733571288	2.134378568	1.629802711	1.934612518	1.353466682	0.135434658	1.858062061	1.668500116	2.34715936	0.608814617	0.039193753	0	0	0.096946982	0.182036701	0.233402545	0	0.195677021	0.498683225	0.186092101	0.114407962	0.113385469	0.194736978	0.059904181	0.255270179	34.33182946	4.283665162	0.457297101	0.150997709	0.166162752	0.08600987	0.198619731	0.89712286	22.75675293	0.233527623	0.360574164	3.628050074	3.649818825
CG17681	0.290407644	0.078388045	0	1.889423608	4.084060356	1.319873706	0.421069412	0	0.090625431	0.011308782	1.740053345	0.308631928	1.518238664	1.003090401	0.94447317	0	0.039883964	0.060316962	0.303333653	3.770118289	1.301818689	0	0.324798122	0.130288503	0	0.04504393	0.029161535	0.069054569	0.245762961	0.092178257	0.010984681	0.080856301	0.105638395	1.557357154	1.770245988	0.734493277	0.012776167	0	0	0	0	0	0.417663768	1.475536192	0.101098809	0	0	6.547239697	1.277039725
CG17684	0.009031268	0	0.388567615	0.171790716	0.151336656	0.699236863	0.658392518	0.478736411	0.270731179	0.035412458	0.139788049	0.352501275	0.086101622	0.070218686	0.195230902	0.847864415	0.280621894	0.752086223	0.595873464	0.205284021	0	2.400865593	2.462139994	2.141929268	2.522401562	2.280721058	1.938205405	3.998107701	4.72573604	4.142672426	0.716740965	0.496599009	0.06126236	0	0.022701118	0.055455071	0.382494575	0.135809148	0.217594046	0.075791348	0.286322511	1.78480513	0.032491052	0.035397277	0.345845993	0.144908625	11.71117061	0.086921955	0.113672619
CG17739	1.267740671	1.079799698	13.52728883	0.636481102	0.861625617	4.526814682	12.3414309	7.984145585	14.58918448	7.640861613	7.973167754	16.27116375	0.244713192	0.635874612	0.353710471	12.90656846	13.2374847	16.21121886	25.18920628	0.60845885	0.569077975	57.73298647	67.18936474	47.67012974	54.91331701	66.73632592	57.04623648	95.34427107	93.86811875	100.6498341	15.04664048	19.65541268	18.687108	1.347447316	0.864238995	1.316096409	3.142170437	1.895626429	0.360939232	0.115388676	4.844575011	17.53650704	0.195386194	0.164511451	0.54821031	0.210696871	14.86267225	4.1497151	2.003336824
CG17751	1.467997201	0.510923659	0.098650171	16.39317017	12.36628696	8.928438907	0.828525691	0.199673554	0.140326538	0	5.18669532	0.308706484	12.37830295	9.670740694	15.36999803	2.876689198	0.696076151	0.085970086	7.49655477	11.8958781	5.943468321	0	0	0	0.039361665	0.011427778	0.010727905	0.01788195	0	0.024499418	1.024185591	0.625714035	0.407133618	21.36774756	14.19919361	9.874510589	0.421558581	0.153101706	0.021867467	0	0.109180179	0.039972933	5.521799667	0.051411825	0.268994153	0	0.024801717	0	0
CG17752	18.73595196	3.872576712	0.269640225	34.39172933	34.81551075	25.77928279	5.388018759	1.458448829	1.467528201	0.865418236	18.35175796	5.126000075	33.34655903	32.89949277	43.85415942	17.40364035	1.861580373	6.84584974	38.19685141	42.16316883	18.63631772	0.042969441	0	0.099483032	0.140043824	0.008383936	0.082978809	0.035903021	0	0	3.570332575	2.948346798	2.157934246	105.5004265	57.14359201	46.50820243	6.647141304	4.206222584	0.136207887	0.009761981	0.218974259	0	11.3238004	0.04970789	0.5055933	0.564077201	0.035969575	0	0
CG17999	3.500057415	2.709911453	3.058632757	1.978965721	1.043477492	3.72096323	2.441991228	0.458818806	0.258158849	0.040857331	1.352988169	1.805534528	6.174329961	3.772457547	2.831832563	1.213455856	0.547345859	0.30275269	2.89809121	1.866561002	1.499481825	0.039678241	0.008931149	0	0.088285399	0	0	0	0	0	0.23109576	0.332219208	0.654956866	4.783409285	4.630247419	5.320913015	0.648716033	0.591249978	0.032639801	0.109166647	3.497206717	0.029639707	0	0	0.028733761	0.284338749	0.128892257	0.397896828	0.159345301
CG18003	3.34506161	3.765516306	3.275982056	7.481110554	10.81646542	10.71262864	3.615387869	3.31377042	2.350004473	2.753407923	8.781038789	5.118261511	13.16283313	13.39472033	17.12058914	4.329016337	2.551372379	5.957481059	8.083619566	11.37210427	14.34094669	6.287401957	12.16381371	13.81107954	9.03237744	14.00751532	17.73972802	10.08451883	12.11985147	18.0038113	7.899266387	6.510827289	7.332151338	10.85572405	7.366573025	7.749284501	5.641934277	1.478323011	2.52109733	2.517317343	2.645693074	1.725241107	3.963492624	14.83499854	4.353452508	1.435122291	2.002014784	9.269949721	30.45650243
CG18136	0.927267636	0.833629784	2.129213582	1.469696242	4.016687446	3.211175666	1.240347273	2.599999506	0.305064182	0.564883825	3.38374593	1.31719352	4.058667406	4.029751852	2.341964428	0.915451491	0.193048038	2.437779401	2.264609226	4.467733879	3.037726059	2.873306862	1.214107529	1.229132355	2.570022387	2.112394654	0.933268753	3.03593164	1.452177603	1.436314241	9.473612238	5.36427839	2.554704144	0.342250414	0.294213421	0.325431233	0.056600102	0	0	0	0.544205696	0.126206122	0	0.074343178	0.22200542	0	2.118589227	0.022968893	0.015254008
CG18180	1010.900715	638.7094364	62.63890407	1125.51978	3132.607044	1195.974833	1.619297838	26.33211767	233.1609888	269.5450623	1185.512705	27.76226618	1956.707349	2706.853759	2180.969667	4.203884651	207.6720715	12.14981548	21.15652821	2518.799314	3196.77128	0.096667845	0.057561365	3.41466751	0.678566594	0.05308569	0.321693579	0.265051641	0.071259168	0.321597535	46.90329701	25.66435676	48.81750423	2202.235939	902.1359352	1075.089428	12.15528086	10.16982673	0.099966481	0.010401602	7.566639222	0.182953063	1381.357859	1.068618611	516.8957135	31.9001641	0.509334225	1.37437639	10.25074826
CG18268	0.499809134	0.817138845	2.285266146	1.124360757	0.289341645	0.829956447	0.914123191	2.004393133	0.409479491	1.00944639	1.14092669	2.132511776	0.870791096	0.610808968	0.548722909	2.972198782	1.27986465	7.268961951	5.002005539	0.700210078	0.19981769	0.162341306	0.034029487	0.089287069	0.027101541	0.020436614	0.120175118	0.052936545	0.135897372	0.21479983	0.452766193	1.580500328	0.722862041	5.838208474	5.397847605	4.682103588	5.378055188	4.825882237	1.94011887	2.588804388	0.017996742	0.378368108	1.132779618	0	0.274624899	0	0.106571533	0	0.019325549
CG18302	0	0	0.614994887	0	0	0	0.145891146	0.216469892	0.008384119	0.016035682	0.511831252	0.697737749	0	0.015466647	0	0.085845314	0.269204374	1.971120666	0.285557318	0.060259557	0	2.426547454	1.467028956	0.84130051	4.839146988	1.996236891	1.445268874	12.29607877	12.55773715	9.768985044	1.446353799	0.638616228	0.082389608	0.058880466	0.01054606	0	0.014157913	0	0	0.002193529	0.015788287	0	0	0.095548347	0.00740725	0	0.009540505	0	0
CG18404	0.252447468	0.031454287	12.02629365	2.550333976	0.969159612	0.693229846	1.568589058	0.781717805	7.486495404	3.261289021	14.88788243	14.06900886	7.791432658	4.798641946	5.104001816	10.70545079	2.373257728	39.23714731	11.1518038	6.123258721	4.18367093	0.497008273	0	0	0.429711588	0.02310159	0	0.03968339	0.025154171	0.110963399	1.578069138	1.1795969	1.412511868	364.0684473	212.2693796	180.5600405	17.69672526	7.810546982	0.242610897	0.421314203	0.267536972	0	16.43028319	0	0.517207839	0.959370133	0	0.335374595	0
CG18417	2.273363944	0.581581836	1.67535251	7.182661337	5.868135782	8.056830225	0.779960763	0.459141822	0.110802221	0.141282117	5.883508693	1.925852254	11.84315011	14.46963724	13.38044147	2.337295464	1.235880534	2.942738506	1.153137895	24.21558198	15.01526687	0.025205105	0	0.019499922	0.030148855	0	0.206275501	0.044329573	0	0.026998388	1.698461095	4.5525187	9.684024177	8.569875145	6.079867517	6.773406302	0.117188561	0.191834297	0.099222614	0	0	0.045305519	9.245002302	0	1.296082195	0.225093187	0	0	0
CG18493	60.77815104	56.087185	21.72648037	44.78623479	153.369655	94.70553906	2.190855693	4.71925304	6.809965528	5.796838786	79.07251111	11.77618251	146.9938352	142.7762479	109.0819995	8.043557829	8.787303088	32.09192399	22.16940923	148.2825621	113.2958468	0.407527984	0	0.055644004	1.155073493	0.006188254	0.105975328	0.075543986	0.140347755	0.012729278	2.433170109	1.863732613	2.563049843	414.4985562	256.2170129	221.3378601	27.48528278	16.80572064	0.03471996	0	0.057918711	0	31.25864031	0.066151184	14.44279329	0.551917663	0.106373902	0	0.014473908
CG18547	15.62005401	17.32928574	11.51987294	26.57049801	72.22915177	54.43101375	14.49747864	5.297575655	10.45102287	7.875928929	40.3134116	20.74169014	84.87618092	60.23330455	115.1824614	26.86308761	13.61278101	14.40254153	53.83904928	76.03334184	75.50691925	11.47829594	7.202018919	17.57551581	15.02638486	7.881174727	23.37527753	18.68191621	17.48607297	32.95044836	14.22221985	11.15383126	19.96383153	53.97747004	37.40937281	56.25830028	3.872210307	5.310966618	6.959555978	5.117354528	4.988218184	2.771708499	15.96049756	22.65412785	10.22179879	1.13471515	2.61650616	23.14607456	49.26559512
CG18563	1.588623076	1.370286696	0.425955544	22.43704927	4.591922046	2.047311167	0.24965753	0.020593291	1.612467778	1.203302261	2.010445949	0.227150768	7.103132917	5.267016179	23.04826849	0	0.354657773	0	0.01278224	7.582760317	6.621901665	0.220372963	0.331083709	5.984856837	1.13085859	1.01040758	22.53615907	0.468001264	1.125902751	2.92069373	1.560546039	0.34259825	11.84640754	0.250100548	0.099382903	0.135499487	0	0.614836828	0.028996673	0	2.605247262	0.132512154	3.737862952	99.91193797	0.686915905	2.954673286	0.226689133	13.17241203	89.37723521
CG18577	0.065064145	0.0244002	0.173299342	2.7768148	1.685019517	0.991561073	0.390694867	0	0.247685019	0	0.932705471	0.388473481	7.218495191	2.088614326	4.242583175	0	0.047951762	0.191432727	1.052827473	3.765926935	1.457636598	0	0	0	0	0	0	0	0	0.049232355	0.04434229	0.081977418	0.241837324	7.973549241	3.984487885	3.631167024	0	0.137135981	0	0	0.029648267	0	3.513748613	0	0.31816193	0	0.102186293	0	0.706529758
CG18609	0.026887945	0	14.48517048	0.486162175	1.192354323	4.070237191	8.754345702	2.344324464	3.297068166	1.970996787	6.363724613	10.22745659	5.972676581	0.988974787	2.453642007	33.19290122	4.998937368	17.85291876	25.71818435	1.840345462	0.040365346	0.08247034	0.738781125	0.249374426	0.349139397	0	0.967866848	0.660415085	0.222135163	0.364831911	27.76399283	47.05056306	67.47823086	0.638710757	2.353696325	2.787954978	3.042484096	0.457097308	0.276311078	0.666403688	0.137805684	0	0.11607907	0.034673599	1.154243124	0	0.021045388	0	0.408654415
CG18628	0.812850839	1.705826092	323.9021265	0.152010436	0.888345111	76.22221939	116.073246	86.46756563	163.4957131	126.6347553	206.2354683	299.7343625	0.364114621	3.708457228	0.141086093	103.1453633	148.4896305	563.9609751	727.8250367	0.107337336	1.36281444	3.913220032	0.531735607	1.039727538	0.75222601	0.05810002	0.525270262	1.109245991	1.546669186	2.235607716	84.26489887	255.7064644	182.8776136	94.8305264	68.6652683	47.13737695	15452.27367	6306.689755	4.271976425	0.613989103	2.733086066	0.468076767	2.034393998	0.298617308	0.758601519	1.499256156	1.382403264	0	2.45728688
CG18748	4.186160853	2.118058357	4.818254573	13.61837028	9.90491561	9.34444871	3.382908955	2.42733322	0.771905429	1.571263106	7.853309319	3.092771115	31.8350911	12.14767395	24.58576053	6.872268632	1.466043158	8.939820949	5.80477897	25.69911162	11.47574968	0.154379842	0.019854767	0.468981823	0.007315965	0	0.45865073	0.004127122	0	0	0.715828153	0.686018734	1.24041428	43.49686149	30.78623034	30.50408394	0.525361135	0.865050712	0.07132356	0	0.165607968	0.022059427	18.3960366	0.112751396	3.560812893	0.148912598	0	0	0.526454324
CG18869	1.673042154	1.39447125	4.855847655	4.967185809	2.910573458	5.202610166	4.754712031	5.054654736	1.397211277	1.185757689	3.533269209	4.079265832	8.007221816	5.264213508	3.96424276	1.499804454	2.356798001	7.236860105	6.371912046	6.830371805	4.841000741	0.048183728	0.007500581	0.014394052	0.089600704	0	0.017776744	0.148872083	0	0.095341254	0.101671685	0.198390837	0.602207243	8.383480236	5.76937733	6.40858592	46.88787037	13.41919191	0	0	0.076104959	0	10.74901482	0.136190576	22.63377874	0.236826402	0.255440551	4.476298987	4.914139946
CG1909	0.570985787	0.504021549	3.766663236	0.738320816	0.240150869	2.127273811	3.141683353	3.726921212	2.219904869	1.46621835	1.445146521	2.922137361	1.085984243	0.695528871	0.591450302	2.824596272	2.246633851	5.840151773	5.218963006	0.620687741	0.251366259	18.98237717	23.32389977	16.34135823	23.98560232	22.44031683	17.97630478	37.85449402	40.83276451	48.90408927	2.273490277	2.604081561	2.858195312	0.032072455	0.244827047	0.191956282	0.250063398	0.297361903	0.189023369	0.047485688	1.603384034	7.9471374	0.028704822	0.057953902	0.867014403	0.328018358	21.05033101	4.561020109	0.374266893
CG1942	0.070766862	0.438758618	0.023225605	2.310030318	3.497610675	1.279399362	2.180052725	0.51915124	0.369847013	0	1.871349425	0.994640582	3.237995124	2.046244127	3.923066361	2.348536521	0.06823344	0.231617039	14.37995782	5.40661534	3.392405403	0.018280625	0.091709651	0.16673311	0.190542256	0.011591852	0.166317126	0.12537992	0.217236226	0.154482442	0.362343704	0.102553736	0	0.905719978	0.624923393	0.308217937	0.023027514	0.028344215	0.042353199	0.007247925	0.035859618	0	4.922336941	0	0.410867108	0	0.071333694	0	0
CG1979	0.982321256	2.459616076	93.80038663	5.390012908	1.127828686	15.97070273	39.75790439	68.46665705	7.006358348	5.971551264	8.283869522	16.13167905	2.901156644	2.728188718	3.494843805	15.47980917	11.15526771	40.62114032	28.54005362	2.629107571	0.672879644	2.468867967	1.705663582	5.961528766	2.124696357	4.240763067	4.560966566	2.904176489	2.722985426	2.361134392	4.898467276	7.295303365	9.705738664	3.684956888	4.272151667	1.360278062	121.5030639	77.40922188	0.031911839	0.023588686	0.426161589	0.01478882	0.949013866	3.690412294	81.89898631	0.313360518	1.518752472	33.90077133	22.44922928
CG2010	8.236803309	3.947798796	5.745948	3.232030616	6.905166612	7.836312547	2.922529086	2.479900954	6.359756468	3.459073987	12.07307673	9.104317196	6.959493084	9.243151759	7.395808247	6.904981483	4.353639296	11.28959306	13.68431771	4.904930296	12.258047	10.79144098	5.732576767	2.81574145	12.22357361	6.879008522	3.665337027	13.80231678	6.902814962	5.540641298	52.37965524	25.45010603	9.052946989	1.008250691	0.838579958	0.688994528	0.361442018	3.61580865	0.071356998	0.044442803	2.243435979	0.181066733	0.046799205	0	0.039197575	0.030018477	3.280946694	1.730746863	0.008101877
CG2016	0.645610464	3.000173388	4.452958922	18.37393601	3.354783732	2.564239705	2.815137178	2.072401565	5.649489488	4.95481216	1.712426299	2.162081506	0.699868835	2.657095013	0.394701062	2.121144724	4.571529553	3.583890456	4.600066699	2.75659804	1.280722908	22.9553689	25.67203555	16.75028393	22.33731015	29.17972083	19.7398907	26.76631314	38.4850094	54.65944057	1.661878034	0.944146218	0.289578099	0.249771856	0.14087555	0.163361346	0.613006488	0.113115679	0.04969442	0.043354299	39.79275855	15.54065969	11.48907222	5.574692207	3.740016777	2.018441372	5.640590697	31.42375444	13.6238931
CG2022	0	0	13.23092871	0.06466221	0.347841841	3.153746788	5.188257225	4.285552049	6.394275013	3.960467013	14.62879393	19.0341154	0.163889708	0.124303191	0	3.40991329	8.407739395	27.3387764	22.48811873	0	0.154981083	6.010742508	4.986935753	3.087753887	8.531077631	6.832696139	3.867872607	8.768873067	6.397087644	6.061291563	66.94638241	57.06026965	31.92235435	0.52081214	0.254350886	0.183062116	0.088067738	0.167224888	0	0	0.774265035	0.032197498	0.02034649	0	0.078265176	0	0.064674869	0	0
CG2065	33.42238459	6.199991795	2.694218019	6.27050965	11.05254188	25.85133149	120.8394178	23.55928731	2.474600222	0.635604921	7.094080462	46.0859762	57.74342644	13.14167761	44.78732633	6.576287118	2.504627935	1.60484271	23.12491146	10.08769388	21.69212076	5.778493124	3.604212787	5.839666071	7.001331181	3.178444116	4.930334618	8.145271301	5.67492616	7.114654677	6.313899695	4.905212467	5.44298287	16.18046259	8.455488046	5.387610552	14.91224745	2.856584977	0.079446612	0.323664094	5.272971011	0.439855495	6.842720543	2.927875797	7.745086638	0	0.128322122	1.124955327	0.874976624
CG2100	3.689113891	3.607955126	6.450156065	4.595992895	4.512974572	7.548340519	10.98908791	3.990250512	4.627789739	3.197154889	7.610948303	14.57953071	2.951572155	3.792236497	4.3156306	8.39384167	4.242868186	12.72314199	13.55777771	4.132302594	2.974804353	1.505156328	2.098561174	1.904591764	2.220337036	1.445703282	2.145575822	1.627358838	2.64442682	3.727291064	2.087138889	2.962560545	3.338027885	2.095170073	2.143538014	2.328402025	54.02849669	9.609034958	16.29565654	15.84225082	5.058622836	4.801181001	2.772847898	4.694605225	18.86419539	1.562135464	2.551802527	9.714430997	7.572611461
CG2217	0	0	2.762477059	2.557689929	1.329151038	0.724413664	1.313837954	0.896630265	0.404582947	0	0.607855196	0.840629624	6.515391918	2.954445997	4.161950323	1.174769427	0.652991383	1.155722668	1.589674084	6.587187364	2.105239714	4.741034074	7.739485772	14.50570865	5.6453414	17.45252961	21.31727008	13.36978426	16.24051974	15.43488403	5.850770232	4.933335033	26.76233488	1.086754275	0	0.662128577	0.772720091	0.433081063	0.193246671	0	0.371589736	2.89277802	0	1.689023202	4.761114047	3.053576541	15.23560433	0	0.755788733
CG2269	4.642268062	7.577498075	27.21203916	3.606672977	2.924154651	7.780049582	15.89705182	15.72343631	25.76250074	23.40854725	7.215715509	12.4715995	4.074603531	4.252494078	4.135404512	10.27892429	19.39367725	19.9726693	20.95444952	3.315475625	3.490556481	120.2284356	114.0469524	66.92815363	112.4340594	117.7624516	77.03055771	206.1839376	195.2728421	203.1790783	15.08499297	16.5378353	13.41929181	0.131740083	0.545582503	0.105784464	0.189215832	3.411886875	0.091153969	0.136909841	22.37129972	124.453763	0.136180478	0.150688308	6.693949835	0.011817886	141.0450519	10.57856871	4.653800517
CG2519	2.064969234	2.268014214	6.526635259	4.169988063	4.288932112	8.174294849	15.99878078	11.30126009	6.457717772	5.419867954	9.069683916	18.59117575	5.196987585	4.488375858	5.551187322	13.86310185	6.729210262	13.38134325	16.50480074	4.004038797	3.552922102	11.79632444	11.23927304	13.60113533	13.85886432	13.65305072	15.73656187	19.97904571	17.88679312	19.85353148	5.10898262	5.607126679	5.808225312	2.679026754	3.356845914	3.133359243	3.792784952	4.689694589	32.33791103	21.19068894	17.34821894	35.54707081	4.023457709	3.087132878	16.86381214	0.779769007	54.86094415	9.445249133	8.902444024
CG2681	1.741475651	1.659155756	0.696245365	0.982654419	3.771696825	2.914836626	1.018581555	0.379016193	1.314475607	0.142735754	2.685591107	2.217186148	2.50456142	3.434717767	1.555057838	0.96249456	0.986582712	2.559788508	3.320899683	2.405893905	7.552945503	2.669965692	3.273226512	3.796434278	4.332054033	3.81436752	5.158923757	6.359213439	6.144903021	6.84279428	0.330535635	0.282746804	0.629921117	18.89913323	16.26537205	15.81280256	0.701747526	0.920215775	0.02278123	0.009538083	0.235139195	0.125380459	1.229373095	0.024756687	0.831146149	0	0.170904243	0	0
CG2765	23.43541774	20.52159516	106.77255	25.62141679	32.62299284	40.32850725	61.67953804	45.05099673	28.93227518	31.6963298	82.48621859	90.22548084	38.28005003	27.93583931	19.36428098	69.74774025	39.11804187	144.4520217	150.5851309	22.25006434	26.58562058	27.33956755	28.66714495	21.18096915	24.62475435	26.1536975	24.24672064	37.3712574	37.8871327	40.52952599	238.6001506	336.3607806	407.6577337	35.36137704	45.03014371	33.11682065	45.878894	25.87078331	48.60928139	39.92811892	19.9530673	22.86540787	20.8036826	6.693726007	32.12821997	1.101040525	28.32993328	33.42407616	13.58280343
CG2924	12.68543425	12.82770613	46.68798977	25.49161943	8.75898618	62.43768118	165.7510818	144.6925816	52.14575128	30.0096966	42.31513038	79.72314993	9.716992815	7.649486132	10.44283908	149.9682713	67.55042906	98.26714686	49.94612766	11.42882331	5.05387208	29.9749056	19.93298887	16.67569759	26.48336631	25.67900872	13.67470552	31.19212281	32.59054337	29.4771769	16.60195287	21.91472812	18.87324149	13.96405409	19.38246631	12.63533257	2.850565576	16.7320183	219.3397741	262.0158413	69.03098752	67.25060625	43.0440287	8.987437685	30.38575418	85.64858562	45.22607555	24.28969341	32.2414295
CG30008	0.089365547	0.068549329	15.02407456	0.729724986	0.98441656	3.282548736	7.160956647	4.70193774	1.234295755	3.483578869	8.553788501	14.96009907	0.868542483	0.64724545	0.876177599	11.49135038	1.749528905	18.78322293	23.79033648	0.814926609	0.1136989	0.195511789	0.292588516	0.331497489	0.258807376	0.050184695	0.658409125	0.087141876	0.328549237	1.269621402	30.89525089	50.34417057	62.17248078	1.546842277	1.923495166	1.812328023	13.65515733	4.191421012	0.133532493	0.116110402	0.25002969	0.041745628	0.101672924	0.05377968	5.711352026	0.122668068	0.17830141	1.182869659	1.791993303
CG30026	2.825644615	10.85456758	245.0413686	1.390032179	5.748625868	23.20013813	96.32091985	177.728584	92.36887892	55.45181304	18.36083756	31.33434334	5.653521956	8.493395398	13.95168539	113.1279776	71.8256262	56.72884494	68.884376	15.31744958	3.748313583	103.8890791	155.3334927	299.8820971	106.0530616	176.3159497	185.8896746	70.5996482	165.9716214	311.2655037	194.873184	200.1249079	496.9362365	85.65029127	102.0556644	71.25364023	60.64629337	113.0253917	5.877820103	7.907492297	2.059041622	0.198752512	1.119522408	27.80677481	0.764335788	2.74096648	7.529865105	1047.973491	7.812858612
CG30043	2.845903163	4.100856651	1.08112363	7.928829564	6.409089423	3.489202347	0.466167301	0.04222916	0.182219075	0.459866014	2.289235726	0.848038229	16.07887673	9.894804069	2.503735379	0.467140106	0.485218263	1.584369013	0.853577405	7.747296226	4.134156558	0	0	0	0.021798589	0	0.011987649	0.004078754	0	0	0.028351576	0.065388497	0.231393755	7.090535722	5.228739339	3.321597064	0.152461726	0.917738382	0	0	0.07808028	0.032864044	9.139909812	0	2.578335686	0.24628376	0.147988615	1.558467033	0.137220846
CG30069	6.085072789	7.50228327	13.65237331	16.66086415	9.391391455	32.40207709	12.02915937	11.45242494	4.557723289	4.437982372	21.27820916	7.452101695	12.53096457	16.78044058	21.11110152	7.253669302	4.317430037	10.75743179	15.74119977	10.87388777	8.344231661	28.19560459	23.23514528	28.950875	60.22005816	27.56283632	30.53131528	42.59545166	30.99682585	31.24959103	31.38835943	28.99382294	36.59334688	8.488636118	14.4638371	7.945817004	0.867528104	13.23100966	1.61378795	2.165499496	112.2251227	14.64492761	21.38313312	13.90659751	54.71789527	13.49671516	13.58038602	8.884137136	11.83392597
CG30083	0	0	0.066921983	0.437931872	0	0	0	0	0.081008145	0.570800504	0.075455454	0.020719219	0.032715958	0	0.156948482	0.22272768	0.739566192	0.033928806	0.705286795	0.084862228	0.029579426	0.073919616	1.295402838	2.392798072	0.564127419	1.753295988	5.025818037	0.644685668	3.043452576	5.646171045	0.579637029	0.819498878	1.627388469	0.243777414	0.165769058	0.163101435	0	0.082070378	0	0	0.103831148	0	0.441474611	0.758121133	0.002831993	0.024156783	0.115413928	0.812619457	15.81241544
CG30116	0.433839913	0.848823367	2.630693207	0.153834851	0.341155336	0.933412504	1.247949332	1.730289068	2.12059377	1.36298956	0.753485636	1.746930226	0.362448303	0.310960227	0.447660975	1.169075779	1.136704591	2.107056552	3.2569199	0.291469916	0.397355149	9.052400358	9.586063172	8.000197504	9.952677438	9.610127268	9.501821	17.20135475	17.61194009	17.21652608	1.082870935	1.122137499	1.158614084	0.907130705	0.945426848	0.8077173	2.008006615	3.030714662	0.035230671	0.027680589	0.755357854	2.928717173	0.452418537	0	0.392223532	0.023552597	18.03268973	2.260099135	0.146394889
CG30151	0.604491611	0.308000583	7.385436079	2.100539947	2.473402703	3.212162985	5.512610965	5.928151465	2.286744415	0.798600885	4.208837727	3.333156815	7.858026524	4.881627117	7.913347831	6.463108606	2.645558745	7.581316423	5.663436986	5.07769585	2.294193696	6.263418938	15.01953373	15.31618841	9.073580708	11.77064096	19.13837077	10.59198851	13.91726703	24.04808136	19.56066857	22.80701203	24.64302273	9.748089302	5.350046733	5.49190698	1.228103848	44.80609093	0.274291061	0.008746097	0.614526266	0.076736835	0.601679106	3.669956273	0.400923402	0.186821197	0.019144391	0	1.031478526
CG30154	0.200095055	0.193122904	0.472136879	2.493003312	1.861559336	0.462829273	1.164544217	2.101866963	0.099381377	0.377415905	0.760782325	1.038899661	2.383186388	1.215638279	2.190115031	0.883082299	0.201116611	1.433061591	1.484720124	2.612716283	1.424231553	0.420391272	0.716686768	2.291645228	1.586630857	0.652685243	4.427343561	1.435752306	0.709856137	1.670487513	2.358771133	2.740986131	3.711571991	2.297011919	0.931386781	1.084591562	1.336397852	1.903695568	0.076771874	0.010154428	1.179772422	0.201722454	0.624965645	0.238883333	0.308927941	0.095144458	1.135321131	9.232635501	1.210831708
CG30161	0	0	3.265686388	1.01084574	0	0.12490293	1.137321036	2.379525255	0.083718658	0.039770675	0.363013649	0.559707535	0.281665533	0.591687353	0.168370076	0.011302873	0.101734382	1.705726385	1.296287725	0.18730223	0.030321343	0	0	0	0.012730277	0.025752539	0	0.178399183	0	0.070578346	0.020535362	0	0.037372883	0.018253947	0.013077833	0	87.38179927	4.401370169	0	0	0	0	0.120416115	0	8.558652807	0	0.035569954	0	4.171491576
CG30197	8.057571706	15.25792551	18.22449377	44.99649767	45.34075051	21.31071104	4.385565622	4.962250235	14.90054771	11.12786576	17.98870232	11.7246708	21.75432561	28.66990917	20.59895881	9.78243395	7.990432845	26.9883457	34.62297918	31.88456184	28.62888575	71.01447209	65.02521844	66.33057439	90.70864367	56.9102343	92.27866728	128.124684	132.4175369	179.3332411	45.31814636	33.72816321	30.96626609	57.53560257	28.9208674	19.70056139	12.88175422	17.37494213	1.972502651	1.18780946	113.6032109	15.00005279	2.344907457	0.93848126	3.493935237	29.17890731	6.757315673	101.9648411	2.73290651
CG30203	0.273704943	0.176192209	0.765341695	0.320909509	0.247129289	0.405239473	0.793609699	0.177734863	0.97989807	0.151148883	0.9358561	0.941145878	0.518809896	0.543794246	0.420330295	0.457058142	0.882042733	0.557902681	1.134094716	0.317347292	0.300536561	1.819341368	1.745936887	2.038600667	2.250139645	1.701876742	2.341224532	3.850260243	3.283006518	4.082640814	0.68823023	0.81604271	1.007058553	0.2337307	0.023645063	0.030881673	0.012123108	0.110112394	0.006394899	0.025460001	2.061699512	8.312402783	0	0.011875605	0.388730198	0	1.611544107	0.341121883	0.115087586
CG30289	0.84248328	0.82697685	1.508011223	6.746665994	2.332248067	1.713482063	0.461418787	0.582390256	0	0	3.36259718	0.133281986	6.465754828	3.912930372	4.59174456	0.319650384	0.418041001	0.251884085	0.613441465	7.92207388	2.171204125	0.047960519	2.06678665	4.136730957	0.515810199	0.973793738	5.305148556	0.428181158	1.011878208	4.240740462	0.509219076	1.392188666	2.468645083	1.932052122	1.568033442	1.151600986	0.013711375	0	0.020682056	0.020104046	0.244465055	0.025312202	1.739247494	5.428936358	0.449491994	0.211106737	0.015705279	2.110524913	4.477474941
CG30345	2.057584982	4.567805237	2.377041743	9.098878427	5.869317236	3.100684773	1.746902972	1.954616043	2.626237265	3.109702486	3.927298708	2.352393647	9.218964318	5.829343131	9.27700058	1.547634566	2.436098707	3.513887298	4.529132676	10.06999492	6.379089774	2.822692859	3.228714859	5.445192836	3.038216664	3.982731618	4.671076863	3.499525968	3.597348361	4.778280859	2.636001273	3.602139123	3.865156006	5.562921219	4.303180221	7.51946238	0.727109082	5.677119824	0.849416715	0.918966787	1.524134637	0.310388982	39.45082225	5.452737196	1.757109798	0.148803951	0.284743828	0.009600481	0.800422019
CG3036	7.065225224	6.629107269	32.84382403	26.78761059	17.34592018	25.8066689	28.47353883	46.44978342	6.807476439	4.810353664	15.49326121	24.84996166	31.08487555	21.65748371	12.74747032	27.83484823	7.769943957	19.14354665	22.65534482	20.63090509	17.582265	40.56762208	64.73947034	74.99313002	43.85651306	26.5381164	68.70676281	46.27339386	68.83152335	65.51730778	40.09016899	49.59164493	51.25602593	32.24774328	36.03994143	28.9714139	0.850216267	1.866278984	13.42796868	8.420099594	42.10809869	16.66096897	10.94513251	26.41228847	5.371671341	1.388538202	15.38870339	7.179014047	12.72434136
CG30371	8.023709649	2.523188823	3.855055637	11.14955388	13.37426015	8.167019144	4.747221516	2.755657188	3.900554524	1.883707858	8.847363142	7.230347893	14.4711699	11.66132159	18.08465877	9.756541136	3.281922495	8.634470253	11.33953783	11.59015719	17.66586047	0.097397702	0.063071498	0	0.18080691	0.003714477	0.061168782	0.029590335	0.126013206	0.030508359	7.747874484	10.60400876	15.10678725	36.57578303	17.50048818	31.29561621	8.402653341	3.312705482	0.048746255	0.02870235	2.199619311	0.31683689	8.326979673	0.1176761	3.749235142	10.96652112	0	0	0.076246945
CG30375	0	0	0.013877792	1.027747963	0.124520574	0.077415047	0	0	0.571660385	0.195381959	0.203918877	0.084654075	0.038564646	0.268765666	0.092081608	0.101051998	0	0.159173017	0.239574048	0.361612923	0.199686638	0	0	0.041447646	0	0	0	0	0.10070507	0	0	0	0.023138095	0	0	0.023438469	1.896776267	0	0	0	0.246625185	0.023764653	5.280648574	0	0.27850453	0	0	0	0.299077177
CG30424	1.82700317	1.345795869	6.615341708	6.478215183	3.669192638	3.93390183	3.199453843	3.018782965	1.661127996	1.596889813	3.119064115	1.923725648	6.471095344	4.100250156	4.839067096	3.747405417	1.318906329	3.762058354	3.730491012	5.422444488	4.53453564	2.486801263	2.905464057	1.85421509	2.090211278	3.444888571	2.56115615	4.571927451	6.047379055	5.635333324	1.431709923	1.954661366	2.169655287	10.66474488	9.414042205	8.539449061	2.411263606	0.543449791	0.098497978	0.050038206	0.463790082	0.462495115	12.00483006	5.674225979	2.567005465	0.544468795	0.800702865	12.49043395	12.39765472
CG30438	0.58084467	0.011774431	8.145711379	2.42294695	0.772670051	1.091228898	2.27147032	1.580069291	2.070491703	4.706325241	4.097333673	6.5592816	1.525199599	1.060706806	1.538138065	1.715600773	2.754818506	12.54257336	6.974659262	1.120006812	0.385354138	1.491626688	0.594500105	1.2635984	1.965071155	2.126292184	1.603419736	3.890772141	2.283704996	4.016194964	2.746844908	4.594651959	9.87914487	3.426693487	2.865908533	0.937230319	7.994341104	326.7706608	2.548154769	2.138576314	3.288823198	0.277184036	0.315420672	0.102349991	0.256688103	0.088748447	2.002029505	3.446956341	0.109311971
CG30456	6.104099202	2.850308878	3.759469829	9.807697688	8.242591007	5.175299377	3.964200348	4.240823643	3.408243706	4.573898034	7.048180829	6.050682293	10.69704463	6.812357031	9.194245341	5.57868315	3.082149861	8.007837404	10.76988446	9.55149873	5.391219724	2.152139167	2.196259014	1.652358494	2.731827408	2.07092308	1.86322011	2.762470727	3.151787161	4.566607861	2.871971237	3.060256991	3.018865513	24.42598534	22.692949	22.07566895	2.374643694	5.010677272	1.757504044	1.802880415	3.769960341	0.522612691	20.62483916	0.135966244	3.150788477	4.137609895	0.551270706	6.131231097	3.517280137
CG30480	1.837511914	2.203370189	1.073081226	5.601248091	8.551288645	5.545792795	0.526020875	0.462382659	0.749429576	1.062575339	3.789305572	1.02494105	8.531784801	6.387370779	5.787293824	0.583160861	1.387963913	1.549853277	0.589897318	8.260330445	6.979202627	0.158526956	0.157665761	0.065098247	0.103562535	0.107631327	0.266390518	0.11908112	0.278641355	0.166365109	0.116195315	0.144184132	0.137971018	7.088892385	7.145487091	5.881780922	0.036427287	0.035198911	0.027344041	0	0.136255078	0.249241064	11.03059524	0.017272536	2.039307053	0.20271599	0.540495913	1.43908666	0
CG3078	0.089755842	0.270644428	3.089457723	0.289929051	0.145174034	0.473014878	1.785880178	2.229322494	2.117145928	1.46525584	0.448094615	0.97275339	0.160542937	0.206553896	0.276556314	0.898001416	1.025825181	1.696380623	1.872879084	0.245240282	0.058518493	8.194872298	11.71851111	4.595830013	7.014380164	10.47297667	5.439498734	14.20578721	20.23914399	17.53743785	1.322621558	1.382414962	0.846818415	0.020097135	0.011593977	0.018662223	0.009678428	0.37091887	0.002282267	0.044228003	2.160811899	14.01522199	0.021694108	0	0.780379374	0	19.18589157	2.24169267	0.594289823
CG3088	0	1.463237412	13.88994488	0.079356332	0.140201558	8.578932953	15.17921141	5.466664284	10.68155477	7.679045676	12.07674343	39.247212	0.011801113	0.3899582	0	17.57145163	8.010793631	42.89440365	24.40276897	0	0	86.70888327	61.87564768	175.2487619	141.9728055	198.7004491	263.9891623	271.9195199	214.4597901	547.2411843	0.148945669	0.889783714	0.078139545	0	0.013805804	0.05904649	0.00291731	0.088956048	0.021600131	0.175975521	0.879502517	0	0	0	0.084231566	0.164824667	0.173067897	0	0.054718306
CG31002	0	0	0.496183379	0	0	0.018597793	0	0.425347765	0.127127636	0.020460365	0	0.223624989	0	0	0.072296955	0	0	0.155483914	0.428837431	0	0	0	0.022694278	0	0	0	0	0	0	0	0	0	0	0	0.041489646	0	0	0	0	0	0	0	0	0.041721251	0.000229208	0	0	0	0.055111963
CG31028	0.343135639	0.503924705	0	1.779465606	2.447734999	1.166887859	0.216631507	0	0.194002032	0.08551193	0.911420549	0.208869548	2.149971791	1.461815783	1.760003084	0.067287143	0.061696364	0.051733833	0.107189257	1.650370878	0.700261027	0.223950035	0.041807305	0.014621042	0.621256754	0.126387238	0.061001267	0.324093849	0.182044928	0.161920337	0.344201051	0.134909309	0.31056147	0.072196951	0.025880581	0.041447113	0.057125327	0.101038789	0	0	3.845331212	0.810757359	0.262381912	0.043266055	2.422272812	0.011528373	0.881880073	0.287547157	0.275628279
CG31030	1.945816471	1.493686374	4.558051311	2.841687729	2.391020662	3.682695422	5.022444977	3.787705129	7.91744564	7.217859182	3.681677956	8.0162769	2.645250005	2.667675652	2.801294736	4.480567202	5.740930922	11.07166959	15.18492788	4.371000695	4.153380937	31.35550002	43.74763813	42.8379916	45.09603361	46.28490323	53.60929336	79.16874557	76.37103967	87.5002972	3.947869957	4.367006425	3.018747286	0.368594357	0.105578178	0.165346358	6.735730145	1.129086381	0.027112083	0.031476366	6.96281747	35.00529551	0.034361886	0.22728667	4.136734695	0.191189534	52.74099158	9.340965978	1.354767872
CG31041	58.10022774	12.6755561	5.762317633	14.73070107	31.79434155	41.39767897	2.713723621	2.622866179	27.54309938	33.08850575	41.33640092	8.05224803	86.58392398	118.4625719	94.74989494	3.275458099	18.23840457	20.93905551	6.621862498	160.657535	224.0231247	0.523148918	0.125352293	0.22331276	0.255083756	0.041943437	0.277886538	0.186887039	0.306350946	0.370588899	0.320177059	0.939943803	1.307933123	193.2207874	99.88765977	122.8697194	3.290937381	1.090427909	0.106775497	0.067029636	0.815358906	0.298678188	115.2467899	0	9.61575587	2.826807007	0.066819134	0	0.165958931
CG31064	3.87468008	3.934897992	4.114019782	2.413738497	3.019510843	4.710222181	6.497317257	4.593108058	6.089206776	4.345439846	4.682810164	8.208320774	2.931927243	3.367199857	2.895214918	6.755291483	4.714078758	6.663109965	7.277124447	2.660038654	3.035366827	9.308222355	8.584748013	6.542418486	8.644960092	10.25653666	6.772926393	15.87781898	14.45677502	13.512302	3.144825012	3.183631197	3.27847088	1.999260606	2.604040016	2.304560107	0.795018056	2.932454274	8.227250488	7.756065214	5.968776171	15.29139535	3.628762581	3.117137373	4.313254414	1.102769568	14.91357604	5.575401803	6.207479
CG31087	7.480578309	15.76887184	6.242955891	21.42093926	31.37943944	30.93706712	3.547088639	2.065945924	2.131345651	0.897130634	20.15315614	4.440335695	47.46913162	47.19013487	29.00791657	2.785317846	1.592815976	3.281114966	8.471250577	60.59078187	56.46228551	0.107165759	0.040993074	0	0.049883403	0.029247594	0.098101916	0	0.009399404	0	0.330837806	0.204584721	0.542063686	38.95548587	30.19680471	28.36807691	0.945692792	0.061980738	0.012298114	0.006423077	0.234920463	0	16.36395218	0	4.103557997	0.085072566	0	0	0
CG31089	0.548060596	0.302241978	0.030735246	0	0.536372705	0.245826555	0	0	0	0	0.103237886	0.088710862	0.123591455	0.505624192	1.877412896	0.28786049	0.071723274	0	0	1.342513404	0.273202993	0	0	0	0	0	0.012169033	0	0	0.063711712	0	0	0	0	0.015650304	0	0	0	0	0	0	0	0.142406171	0	0	0	0	0	0
CG31097	0.520834564	0.059371663	1.596604927	1.675479213	1.175937198	0.215752891	1.418225488	1.547212445	0.207867099	0	0.958339129	0.506787299	1.382682703	1.113480757	1.329086246	1.54266353	0.040880048	2.531062768	1.375013001	1.095391278	0	0.014996549	0	0	0.022174025	0	0	0	0	0.017053198	0.267675961	0.104769269	0.315598991	5.85510263	4.238618152	3.837643051	0.381495163	1.341815267	0.046161616	0.005097851	0	0	0.708475438	0.046147908	0.090526124	0.076116148	0.076526782	0	1.756721559
CG31100	1.812655376	3.04215543	2.863145729	10.15486321	3.725980864	1.775222988	0.822802684	0.528261652	1.734403476	2.441681291	1.889580489	1.126580386	2.912898792	3.344875328	4.105953173	1.049009645	1.558294909	2.441511512	1.988923548	4.431726533	2.185451286	5.194190383	3.913323371	3.072654525	7.908274757	4.485223549	3.701259785	8.732704677	7.580625705	7.175913579	3.247758326	3.901629488	3.706214532	0.852419032	1.091837256	0.679707941	9.15104242	6.054004806	0.157771388	0.105617376	7.928207856	0.670125219	10.14066545	22.35152826	2.611170348	6.592949987	0.587295007	1.763250513	26.58863262
CG31102	2.254096118	0.279910344	6.087600675	8.679604492	4.662003683	3.068310309	2.737291848	1.927184824	1.236123154	0.90448228	2.922786686	2.685630073	6.29437715	2.715049708	6.867214629	4.397337378	2.13524662	3.825999664	6.796448365	4.799174265	3.42449866	1.488908498	2.210694633	3.043238892	2.488313518	4.486307075	3.82905426	1.999420883	2.631126448	4.580432499	2.246033187	1.873136801	2.875510152	8.348122757	7.500342257	7.553386952	0.638128865	0.99487189	0.046724987	0.008101261	8.892153683	0.293450803	5.706124055	4.161653162	0.712062961	1.811485272	0.105825488	1.883734863	8.841091101
CG31103	0.350403203	0.199227564	2.215954388	3.920370047	2.385540523	2.320909227	1.408618239	0.889046311	0.528254793	1.45206086	2.304522698	1.121285942	2.004188961	1.717643824	3.894142391	1.143979577	1.428056307	2.549081091	3.012062117	4.224507443	0.69390629	7.794564033	6.356658722	5.157664214	12.51864101	5.705212813	7.711201386	9.73595893	9.635757228	10.64017122	8.262592458	6.571775386	3.188383917	0.23519106	0.304057539	0.097509503	0.002316187	0.021980546	0	0.026984785	3.757510069	0.25737633	0.495537589	0.041008277	0.120125237	0.040835388	0.036852099	0	0
CG31104	0	0.028201931	1.253109016	1.493564629	0.719526889	1.99750654	2.35014337	0.074439206	0.349874251	0.111664903	1.667390404	1.540494421	2.751895375	0.656304257	7.912471151	12.20478756	1.303151042	6.111391437	5.573891382	2.224335706	5.662790555	0.107268619	0.21965497	0.124371442	0.55972926	0.037537827	0.012772314	0.341338749	0.263609348	0.408560763	1.568651118	0.854309319	1.122460561	56.49134871	28.27764976	29.52884378	0.050364164	0.539321135	0	0	0	0	0.72914555	0	0.097475116	0	0	0	0
CG31148	5.959140703	3.509340331	5.095916076	12.11732575	21.47492386	25.18293952	0.690397045	1.25587652	1.499600194	2.213465014	12.06218721	1.756354661	32.48290138	28.7979069	44.69707783	1.273270226	1.96697792	4.374530098	7.743378667	46.83083257	25.00553969	0.039261797	0	0	0.044409923	0	0.030541023	0.026658595	0.041416124	0	0.168341027	0.15303105	0.601318158	40.85829071	22.29193769	26.41808498	3.451145673	2.472511538	0.101339653	0.008304463	0.118453313	0	36.9778031	0	6.458035221	0.779290749	0.011921734	0	0.057309135
CG31183	2.120933722	1.715634227	2.194474808	2.333576957	2.869684906	1.740829591	1.706809257	1.383913482	2.784770639	2.809205226	1.488709367	2.594844901	1.853459808	1.868886288	1.571035094	1.836611242	1.894299397	2.265600815	3.457806323	1.386570838	1.173261355	3.810970054	7.002004329	8.663257336	5.236606774	5.058923306	10.59268036	4.627703152	6.567559495	7.972712244	4.364337752	4.964764779	6.475914819	2.195466333	1.748548098	1.667132785	0.450775918	1.164794156	0.236323248	0.274108518	10.42406289	0.993055153	5.397532191	0.015353224	1.225299155	1.281779916	3.594220127	0	0.527534032
CG31189	0	0	0.315624487	0	0	0.370452514	0.096085912	0	0.13025693	0.082685145	0.315016874	0.356433902	0	0	0	0.457248528	0.239372329	1.703230105	0.898142618	0	0	1.115398409	2.361803114	2.264043511	2.992295731	0.826997296	3.467179506	1.368683476	3.358199426	6.965968874	4.15652644	2.34034818	3.492184163	0.057050271	0.054734303	0.448760749	0	0	0	0	0	0	0	0	0.025487938	0	0	0	0
CG31198	320.1089397	250.7462665	200.423651	194.0108451	434.5819297	390.6502779	49.26406865	46.33626201	88.6330569	90.08293754	288.9881585	76.43090223	552.7770253	634.4639298	252.6937952	84.73588995	93.27541087	251.0121086	359.1380992	688.7763448	639.429242	3.009207635	0.017322073	0.560057911	3.792604299	0.383729965	0.468923848	0.287217764	0.464883825	0.101229736	14.98854678	17.6360597	25.65443363	2654.082063	1870.773825	1893.784885	98.49286141	136.919591	0.450175246	0.514834254	2.781549913	0	526.4527296	0.487967623	183.0043222	5.338300467	0.152642506	7.016756766	0.551809647
CG31199	0	0	9.78387401	0.221733314	0.198966652	1.334394876	2.746285778	4.09045579	2.016405159	0.953732158	1.628581635	3.970477705	0	0.495513753	0.229791351	5.537830317	2.808419401	12.39975765	11.81620758	0.273913138	0	26.72721268	35.11375685	35.12713347	31.85976941	33.19824268	45.36485708	42.00883306	66.43124459	121.6893629	29.48364436	29.07492592	32.4781252	0.856753422	0.995193184	0.7247403	10.37730489	2.181973852	0.044649744	0.040620381	0.51265592	0	0	0	2.754604271	0	0.234680454	0	0.968041682
CG31200	0	0	5.936242452	0	0	1.111054398	2.81416253	2.25281744	3.452121304	0.968622765	2.395472625	5.287051534	0.031310855	0	0.060067404	4.674939409	2.348026109	13.71522146	13.01360986	0	0.181626746	25.62285863	27.40033176	31.62213238	28.71386893	36.45881401	41.26631987	43.08287244	49.74944294	87.35052245	31.25942038	31.59911726	37.696694	0.844153042	0.330441312	0.323445654	0.883510244	0	0	0.014941084	0.549087933	0	0	0	0.013117223	0	0.098480793	0	0
CG31205	0	0.124993958	7.675059418	1.718661209	0	0.344681923	3.54053994	2.10822214	1.769250175	1.70367458	7.079769547	10.90631745	0.092740559	0.175418131	0.125354803	5.410641412	1.490172767	24.30814587	10.73047661	0.022761764	0	29.3533012	23.29260037	33.85797633	35.96240007	43.44878705	37.10861479	25.26766174	40.53001524	85.27254775	97.46703463	77.88345348	53.62185565	1.685591835	1.120955082	0.154115597	0.267521077	0.860842358	0.037844916	0.084549149	2.898768195	0.417269635	0	0	0.046816202	0.047726882	0.11925275	0	0.379872369
CG31207	0	0	2.274909871	0	0.053951909	0.588192109	1.113661731	0.017197015	0.299570055	0.302118172	0.462511196	0.863123743	0	0	0	1.903097564	0.595361883	3.670270883	1.627358097	0	0	6.866589165	4.515287345	5.940968311	7.281593003	5.242163166	6.887864787	8.266823624	8.126467598	16.36628468	8.724760826	6.968656541	7.173701133	0.398981451	0.194372051	0.258131827	0.007367754	0	0	0	0	0	0	0	0.007506264	0	0.040928018	0	0
CG31221	0.292598012	0.598098786	16.953285	1.228505296	0.626770824	3.499754344	7.366215125	18.64679231	2.602339576	2.231244108	2.336549004	3.038379978	1.401815723	0.95529669	1.393117019	5.36068665	3.242402345	7.367084368	5.066820939	0.988518015	0.370079056	58.93515742	54.54350894	42.16573884	54.48162572	55.78458001	38.40524794	82.25074006	102.0046657	84.06498791	6.866671149	7.554883061	5.648169452	0.150495333	0.277670882	0.054720653	0.032344803	0.912151225	0.06028748	0.067768205	4.044566487	24.29713464	0.114244846	0.015964911	1.841692083	0.026397873	66.1182278	2.256627903	0.26455573
CG31248	0.187910163	0.948346372	1.6672325	0.605611265	1.356949891	4.830001235	3.483056889	1.491227391	0.240912606	0.663988057	2.787577699	2.779939634	1.657420969	2.181365348	1.542302926	1.861744693	0.188459648	3.661110933	4.310315514	6.06406433	3.558388982	8.509536106	11.39982405	9.564284341	10.82155991	7.710466816	14.10098565	11.46804211	14.4838879	18.00032967	3.367515977	3.563192818	2.756209892	6.70777284	7.43316808	3.457621618	1.213018311	28.63654301	0.090056908	0.300553689	0.200532423	0.433572567	0.784567003	1.328248443	0.336625292	0.0234779	1.688745137	1.849574578	0.031010348
CG31265	15.04817474	4.783438108	2.351756882	5.226656501	26.75728897	9.79788378	0.569569058	0.45651043	1.578598131	2.883781596	10.68898075	2.375140493	23.08698877	20.95634357	13.74812561	1.87590389	2.750697565	5.507518701	7.995399598	17.10963417	39.91755349	0.208732961	0	0	0.159260983	0	0	0	0	0	0.391851875	0.354677228	1.568350282	52.07462212	26.46494984	28.95920586	9.153717911	2.769528149	0	0	0.026363648	0	3.841543806	0	3.633512353	0	0	0	0.225548572
CG31266	37.68237844	26.16513207	4.198006153	14.25797686	46.93563851	21.19554786	0.595615181	0.491279615	3.616085047	1.371648255	23.91003799	4.050943623	50.64706156	51.90360489	26.57746557	2.094990549	2.83401446	7.195242292	10.71426103	39.17862368	49.57706787	0	0	0.05839604	0.154638087	0	0	0	0	0	0.106893598	0.46463553	0.549958046	82.25171707	36.75107473	32.06324477	2.005426621	4.425924909	0	0	0	0	11.3814883	0	4.251640392	0.521504165	0	0	0
CG31267	17.05280809	11.91269086	5.890535259	21.77040391	46.07856682	27.67890072	1.834504394	0.226282365	4.230901712	2.234170499	24.45477051	5.610400825	59.51645821	52.86923215	25.48091552	6.167701834	3.345227991	10.62606501	15.95739856	39.07548905	48.47711108	0.149565174	0	0	0.114092796	0	0.058490566	0.006810418	0.026265719	0	0.354963956	0.852386801	0.8216073	69.96056021	39.00467207	34.5091012	4.047678908	5.776248097	0	0	0.123779714	0	18.66761599	0	8.093942965	0.320170161	0	0	0
CG31272	2.240459228	2.075164593	14.8399138	5.952975758	9.927740845	10.65766065	17.61461344	8.511403647	1.102064635	1.462392164	4.867504215	12.64965619	7.406176765	10.00926962	3.511965784	12.7901488	1.730471292	6.143520783	11.01456583	5.419286187	4.187968253	0.24769438	0.114532465	0.410645059	0.346350851	0.043504916	0.399555268	0.365081456	0.282232176	0.630103824	1.773168515	1.372535023	2.463242938	29.86279052	24.77585805	27.76561467	4.181485026	3.349344854	0.052731241	0.194460254	0.144089484	0.031087073	7.01494191	0	0.320796877	0.120640765	0.059418538	0.240539896	0.092261023
CG31288	3.11298598	2.562627824	12.17414152	5.852812011	11.63409216	18.83826758	15.41782642	10.42528222	1.534932005	0.552981517	11.42062312	7.10784547	27.47775674	16.88291419	19.61116033	23.52095182	4.990701794	9.411266833	11.72202571	32.58533427	23.29783451	1.377302407	1.035066999	1.60320439	2.168820049	1.168577269	2.152760209	1.367392543	1.849394722	3.505131722	3.889929633	3.429844379	3.035763001	88.22301829	79.13123209	53.64949198	4.279738113	4.292867941	1.89590407	0.979245373	0.155078916	0	3.992373391	7.923312337	1.098574299	0.25546527	0.066532749	1.030224944	1.213205742
CG31296	0	0	0.668339823	0	0	1.173531353	2.20376652	0.551295573	0.038103192	0	2.324120987	3.135808495	0.329249915	0.05601319	0	0.421550531	0.540573977	3.068195561	4.8064051	0	0	0	0	0.176444406	0	0	0.019927632	0.244685901	0.034959551	0.135292735	0.096968255	0.049601224	0.109145336	0.206315047	0.294810425	0.559944234	37.36113771	4.102921191	0.026731654	0.016989083	0	0	0	0.384480917	0.0181936	0	0	0	0
CG31300	0	0	11.05749784	0.346137165	0.382369361	2.22518689	5.773754734	8.319602897	1.898172259	2.806322479	1.593217964	4.243514664	0.05117297	0.125425901	0.244080813	19.89424904	1.094511086	14.48438424	19.70859475	0.145702254	0.009914343	7.692618486	6.306736125	8.661633355	12.82161825	5.533844942	8.016660793	14.53718507	13.61087772	19.97697485	6.496912427	5.415002356	5.60457692	83.29808525	43.95071551	37.68066742	6.497288974	3.287307537	0.108706543	0.028066495	0.05088113	0	0.463128757	0	0.015055928	0	0	0	0
CG31326	0.435134101	0.134313366	13.32281726	1.199480866	1.644672306	5.923977586	11.90533074	8.450757483	1.068701749	1.650059355	4.359911384	10.69731947	1.489960808	1.618458562	0.958411463	18.46815879	3.439319486	13.15552581	12.47876473	1.358275881	1.155920205	22.72180695	33.1117097	73.36662215	33.60197044	28.42489918	88.62817299	40.29615349	51.1012342	93.45575467	43.6652515	50.20745295	99.53537592	4.971539313	3.413558365	4.362219255	5.918504627	2.389391906	0.228692956	0.03004979	1.878479576	0.075712699	0.010866745	0.40810114	0.021567821	0.038799938	0.070695644	0.024068812	0.012228128
CG31343	60.17379687	74.47158621	62.07255744	38.11468763	123.2311112	115.7419084	7.243681391	6.970788089	28.06718365	20.52671525	84.64528265	25.25361324	164.2824279	147.133019	74.65936056	21.8654527	27.72184299	93.77320379	103.8314845	166.0149359	155.2096611	0.407757254	0.043226242	0.167286258	1.977435408	0.039247801	0.420083199	0.091070249	0.084187339	0.16885515	3.861866421	6.626421217	8.351708406	833.3079717	744.0269501	686.0478212	33.8654169	59.77849697	0.052223756	0.017837121	0.308410735	0	66.10228566	0.115666816	22.33364931	0.182725	1.297769356	2.113987411	0.293207448
CG31370	1.2255387	1.101840826	5.613605365	14.60512819	5.414438907	5.917417137	5.27830885	2.844785387	1.247666504	1.109888636	3.182836007	2.666708896	12.19967217	8.691554802	12.3105304	1.252473191	0.855088274	3.412315433	4.022619964	12.81932969	7.119654727	1.73459044	2.631560667	3.452829661	3.075972686	2.168154988	4.153026805	3.217079669	3.210161388	5.520889778	2.566372985	1.645613417	2.634659722	8.435679722	4.538124155	6.238880091	1.544426218	1.953979198	2.143348896	1.747710065	5.392639208	1.104070348	7.462256991	3.528797917	1.627787063	7.618870155	0.072627883	0.802712455	7.718610842
CG31431	1.999126446	2.375655673	2.847659063	4.745916673	4.397646177	5.529815474	2.486615698	1.546893583	1.951669785	1.304713148	3.517622913	3.634217385	10.54102609	6.955702028	10.48122834	2.321819884	1.72362138	4.769162164	4.527958337	7.999165118	5.912859541	1.204975076	2.571435734	0.803288205	2.442418019	1.739007818	1.301390897	1.696726798	3.12195587	2.637263623	1.191194732	0.69559321	0.42144554	10.94300616	9.227227378	9.022798923	6.174032268	1.321945332	2.283762544	1.334432228	0.577856808	2.607478579	6.128041337	0.049788158	1.875045906	0.176266681	1.104050211	10.95735564	2.299898706
CG31446	1.35087083	5.550603845	1.99862443	16.21636926	16.5368697	14.87460625	1.051034689	0.119230907	0.933469248	0.544211788	9.979916236	1.093416462	37.95028513	22.31431127	22.4097366	0.397957726	2.147785122	6.350718476	0.328640411	34.34426151	13.40562591	0	0	0	0.081169705	0	0.060586251	0.014099792	0.018177795	0	0.060515124	0.076223006	0.128568511	39.91769964	26.65463207	20.55489632	0	0	0.020318153	0	0.427448555	0	12.70352957	0	2.756835869	0.411796022	0.118244684	1.78104897	0
CG31454	0.043469029	0	0.657681798	0.360691795	0.306542443	0.470610026	0.191676964	0.088696748	0.020882259	0	0.348186837	0.105884728	2.04761229	0.64194002	0.82575449	0.678841504	0	0.614639306	0.321798633	1.790495362	1.539919955	0.023503392	0.142844873	0.264710157	0.012701443	0.517102839	0.176589155	0	0.138755642	0.011156838	0.076766664	0.049674103	0.018644117	0.965622672	0.869283798	0.656506956	0.035226365	0.121930025	0	0	0.020295278	0.076595927	0.441707744	0.043116336	0.105819683	0	0.02376246	0	0.003855826
CG31547	3.838496191	3.420249255	7.301073442	3.348917293	4.6627233	4.659672737	2.86529934	2.487408085	6.916109922	4.729236415	3.687954322	3.92737974	3.793022011	3.784662251	4.797403802	4.549215164	3.674829128	7.516489479	13.0326896	3.34881204	4.950713272	9.407050357	8.536366129	9.031432758	10.8392652	10.45717805	11.94244854	16.52145305	14.83326082	18.72829222	3.841379556	4.543467162	6.048037434	12.06392288	16.32636847	18.30966588	3.400799531	47.89380368	0.165820514	0.172719219	16.42226195	12.13505515	5.138043886	0.158598781	4.104438655	9.89035761	9.668088149	1.875698392	1.196748112
CG31661	0	0.014683306	0.044788234	0	0	0.013780199	0	0.019378348	3.020369368	2.332407927	3.060387398	2.308134307	0	0	0	0.043843074	1.953118798	0.919716898	2.082831104	0	0	0.027727331	0	0	0	0.007201375	0	0	0	0	0.744895428	2.069977526	0.707627897	0.328836604	0.983844011	0.65220568	0	0	3.086461234	4.217813203	0	0	0.099571759	0	0.017706222	0	0	0	0
CG31664	0.079487089	1.400404453	0.954373854	1.000739731	0.773532833	1.169066677	0.176285986	0.444182715	0.520896576	0.009357098	1.062894774	0.292452493	3.464899009	2.509618458	2.755861492	1.258822254	0.251352536	0.48968841	0.481676191	2.341016959	2.000667088	1.80625435	8.708144933	14.02191443	3.085632488	7.117759416	16.95217064	2.526648028	8.322759936	16.84751051	1.415888451	4.197009776	6.997805919	0.350136917	0.263340109	0.175651889	0.282638371	0	0.018621895	0.002389263	0.171226654	0	0	2.167427096	0.389053169	0.227458051	0.092032188	0	0
CG31676	3.05552134	6.307397375	9.994930323	15.06068693	12.86032642	8.288633332	4.721781116	7.693729205	6.747720624	4.679163818	8.411004177	6.934066171	14.52600214	12.61281356	13.16709903	7.225476126	4.229784347	15.13688468	14.97195245	11.58707024	7.111844046	15.68103762	17.60461495	14.67432677	26.14431759	19.09752546	16.43982285	24.94255581	29.51158806	33.83382505	25.07590004	19.61832494	18.89258328	13.68298487	9.306305298	11.78884582	21.61603486	28.20164097	0.777228421	0.290904898	31.44400787	28.02309685	4.535697076	2.098607371	12.56757694	0.21674358	60.49234089	63.569657	9.751164751
CG31741	0.163105224	0.783098752	0.305441883	1.448274936	7.695880259	0.557861173	0.015303308	0	0.443486262	0.124626908	1.103193133	0	1.703909213	1.680542852	5.06943016	0	0.128886535	0	0	4.580453565	0.906748901	0	0	0	0	0	0	0	0	0	0	0	0	0.298422928	0.193822058	0.217294166	0	0	0	0	0	0	1.058428861	0	0.155966839	0	0	0	0
CG31769	7.220263145	9.402806619	31.81009157	10.51403348	11.7093101	13.78106605	20.29125326	15.79505158	11.37334351	4.668752135	13.60328463	15.91868563	27.89980744	20.65344192	22.51008648	31.36488051	13.11716181	24.88197366	44.25204778	21.33746176	16.02489854	83.43744035	85.76903088	140.9611526	99.39719863	101.7189701	188.3553402	111.2930616	124.3933808	216.2016051	104.1607466	83.65289752	162.1396522	8.572262053	5.300644413	4.857533738	1.295847545	1.792081432	0.521013774	0.134262537	1.516003937	0.064797512	0.881700754	52.88092403	0.241017087	0.667151243	1.264994703	53.30820058	0.74679475
CG31778	2.308252938	4.607890396	7.138436176	37.90607811	8.148541218	3.536987806	3.474362305	4.370868341	4.241055569	1.704064856	2.786124089	3.326650988	13.30967847	4.478660313	11.05536889	6.905252442	1.012905261	5.040194029	4.272365572	10.33021118	3.399322649	13.75436399	17.58733082	21.90123533	6.697952457	13.64241409	15.22643274	10.6075108	10.73201016	19.92097899	11.50986374	9.434508142	14.35647671	0.853769279	1.227487172	0.391620744	0.084070936	1.039433717	0.070627211	0.012187437	5.23834777	0.827965141	7.947165168	127.5470834	0.495101018	4.213395479	0.663571515	25.48468487	274.4853444
CG31808	0.779595692	1.503524228	52.28470275	3.511417777	4.890287864	12.44008429	26.09857319	43.30397438	5.977159918	4.737001995	8.904098272	12.07875423	10.3119358	6.450809819	7.984825402	22.16176029	5.341018227	33.18473516	27.67122263	7.534189268	4.511660418	143.0800009	97.40271133	34.88794601	198.986439	122.4550483	36.74384625	265.227334	179.4502007	106.5863644	52.96068193	40.53249381	31.33258652	22.92568253	22.74392409	9.94769148	2.145620072	10.32905011	5.061895088	3.82097385	3.408340498	2.804783228	2.018198062	0	2.276991875	4.218427734	84.82526991	97.80341913	0.891964484
CG31810	2.054761905	0.484603282	3.118866957	3.574098687	3.090804034	5.228733932	9.303227006	10.86592868	0.891642753	0.113660533	3.039571634	6.545563839	3.38513049	2.00725569	5.739520529	7.647007393	1.175855629	7.364213321	4.029062135	2.788152759	2.354985328	1.664144901	2.389727897	3.019968696	4.750323845	1.952860647	4.892795531	2.51944514	3.057041535	6.83773257	1.621363915	2.530130094	2.766948158	3.260335674	2.450213137	2.017408733	0.105610711	0.861358423	0.165074174	0.209823062	1.084011666	0.264351524	2.27849933	0	0.352612743	4.343958639	0.036435763	0	0.366642307
CG31823	0	0	0	0.360117898	0.448071945	0.493854015	0	0.22205949	0.012900916	0	0.29051785	0.22332159	0.159785968	0.083296609	0.384072543	0.369339569	0.122350592	0.53574063	0.686308037	0.568938275	0.373966228	0	0	0	0	0.021212039	0	0	0	0.084963905	0.246373451	0.330480201	0.023186979	1.330044436	1.414025432	0.869813196	0	0	0	0	0	0	0.38439346	0	0.043042306	0	0	0	0
CG31955	1.087247529	0.79963979	3.835135779	8.169658426	3.55442913	2.985217582	3.791961162	3.259611015	0.95409359	1.535074139	2.568294795	3.423124107	6.822453098	3.608706445	4.616320124	3.107752108	0.327943082	1.090760082	3.102483932	6.019144554	1.746809371	1.361999711	3.12565553	2.065473172	1.983207301	2.022910348	2.143864382	2.59103522	3.92692577	6.509419255	3.65652726	2.906951815	2.71475046	3.793908583	2.673920219	1.951373617	0.176307753	1.213838407	0.448805646	0.291024109	1.78281043	0.787566717	6.874565991	1.358128321	1.246246451	8.142087247	0.38324493	2.375174024	5.653497209
CG32023	0	2.205125334	0.942427267	5.530064266	1.365468341	1.051941857	0.784068914	1.558863595	1.345554305	0.839575499	1.280788294	2.687768066	0.461186226	0.436041222	0.580326409	8.658979846	4.483906878	9.007742995	16.04639268	1.02242576	0.086450171	0.132595038	0	0.048178753	0	0.007939844	0	0.030510275	0	0	2.13837072	2.146800208	2.183686565	57.16877254	35.42047745	45.49791784	7.779949745	5.19780698	0.059486369	0	0.247207488	0	10.06477554	0	0.128470755	0	0	0	2.086615006
CG32032	8.094011057	8.265484762	19.42163598	19.05193477	13.45727221	9.518294643	8.705867144	15.91865959	12.92855217	11.41543243	8.467482359	8.571579082	12.22114576	15.12405384	9.464733116	19.87402179	13.93804133	14.79218993	17.90161924	6.73843194	5.13906863	22.71601723	37.32118525	28.37718453	29.96570216	36.65593794	31.31399465	35.7859698	46.6974003	67.63080304	18.53382493	20.20013862	21.0496916	3.580672608	2.287174046	2.917050946	1.167764592	3.293761121	0.269490979	0.807322655	23.9869493	90.13505944	8.523244529	12.9053355	4.815923868	0.906811567	57.96434722	55.36666027	21.6975836
CG32085	2.383077673	2.860582126	6.860308669	1.364764154	1.623488028	3.454455119	4.256531154	3.35479174	8.671756076	6.435480357	3.533021546	7.647741277	0.968664174	2.223510867	0.953581005	3.180279067	5.019984166	6.883992051	11.11785194	1.956599461	2.011538115	10.51732165	12.00151283	10.42795113	14.43765481	12.66459873	12.58692157	23.88169462	21.62331755	22.58940148	3.923874396	2.46434836	2.386025247	0.336020542	0.405379443	0.29891602	60.04991558	13.31411969	0.111267314	0.141698324	3.834725655	9.716659807	0.312667433	0.147331503	37.44951703	0.028057872	25.64859383	10.9404022	7.169610618
CG32103	4.071758004	3.479726247	12.41457868	6.998641764	4.368841728	11.20222561	18.61115287	15.56780525	4.398539079	3.955492651	9.400351083	13.38990881	6.041146885	4.165323119	4.028249345	15.6424691	6.926424169	12.4936834	11.09732605	6.924151495	5.405071037	10.46993883	12.8460123	8.953791788	11.43519154	7.45540147	10.61444065	14.15997322	13.63469867	11.9270486	11.20046697	12.18382865	14.0603912	6.180496331	8.628985369	6.265902922	8.020576642	4.054551092	21.86367161	17.83196623	6.24756593	7.6541235	5.047413125	9.042044936	11.73004999	1.187209151	8.320363326	4.58207528	11.52509599
CG32121	0.270903518	0.862118878	14.77677982	0.255241682	0.530315577	2.997934077	5.648424917	9.999548918	2.375247199	1.647812865	2.262639699	4.174780457	0.957292709	0.971298443	0.610083692	3.07826463	2.612994221	7.183139491	9.701026988	0.680058898	1.023142247	2.887873271	2.454330258	1.337566286	4.436758809	2.052590864	1.33155557	4.391566077	3.076892547	2.136828101	19.06115323	13.41179021	6.241524331	0.270121746	0.164445477	0.02398488	10.60652725	3.991660508	0.00992166	0.007387608	0.522075116	0.027441679	0.025434634	0.064487334	4.120172056	0	4.876949286	6.070167167	1.513197593
CG32206	0.060677099	0.171886749	1.982308459	0.186800389	0.087223844	0.323736076	0.731285617	1.008179495	0.865950933	0.643981941	0.332611752	0.513701997	0.143901637	0.111243534	0.142202448	0.839524168	0.482862991	0.628390145	0.912324084	0.209222337	0.035990535	7.03212514	5.658077144	2.764087054	8.179088716	6.596136373	2.91745458	11.65755045	10.92471542	7.294170677	0.867184492	0.856333371	0.416068577	0.002207815	0.0244915	0.003412043	0.09430639	0.443510693	0.008791603	0.005244444	0.889885807	6.614397132	0	0	0.476299715	0	34.67643132	5.410324178	0.254062791
CG32243	0.435339022	1.609160437	7.115121547	12.36182639	3.789113494	7.804387139	15.28181371	10.5152981	2.424202271	2.401516662	4.289447018	7.366380601	6.687339072	3.22952784	4.686163658	10.10886846	3.772501826	12.36775977	6.60895522	8.498639195	1.802346165	3.817165204	4.002975396	3.58607006	6.878514745	4.003770907	5.665890562	6.036741334	6.332493536	6.619268212	3.158166688	3.538668253	3.047604076	4.483432162	3.93466534	3.369401834	7.295795318	4.577631462	35.28994931	27.16738601	10.97934506	20.50329762	5.909398648	2.594387644	33.77191331	0.956827753	29.14365283	25.80678652	29.43349998
CG32284	21.74467939	17.74182858	14.25746096	114.1040114	153.409672	125.8182444	1.151334015	0.572371161	2.01010845	5.892973943	84.82512718	1.795952647	318.6488133	187.1038622	196.5912398	0.45889386	2.711333913	2.017882706	3.287992154	339.4631467	157.5727342	0.140426794	0.357435816	0.805527366	0.06004564	0	0	0.019598996	0.546449709	0.250309126	0.437344862	0.071750532	0.739627949	37.80581005	21.7750457	14.19273655	0.012347591	1.907496775	0.037103079	0.018887661	0.407800121	0.29046964	78.1345577	4.437022002	28.59458943	1.180796111	0.658309057	0	0.26658871
CG32318	0.031135054	0.290648612	4.341979157	1.179597487	2.227132933	3.349152899	8.483902882	3.647243753	3.020328141	1.4622274	5.70601097	10.31529357	1.30047405	1.170073418	1.485047586	8.385562829	2.660702308	8.048094325	6.220319486	1.314310984	0.678509125	0.116952766	0.070366727	0.017400764	0.026051972	0.06923417	0	0	0.073492204	0.069988852	0.323508697	0.624098757	0.348142184	0.359005026	0.482350385	0.439232661	2.106352837	0.686414224	23.2143735	12.7148256	5.976872357	8.282504319	0.643269108	0.121238756	12.04676578	0.10731344	0.422037699	0	2.973835295
CG32368	13.48854743	40.83736414	319.7633958	36.5114509	35.77781607	13.58018216	75.8047317	150.538639	61.69601472	37.06596707	7.510888815	11.75110569	70.95936332	26.67331951	73.84760164	123.9363367	117.4066447	25.18673354	51.1087171	59.72531887	13.96379045	11.07230605	16.42339511	9.276890764	7.503795148	7.818281313	4.973521352	10.62528869	9.062696835	22.7894324	10.54525617	11.8221051	19.45807573	226.9874068	361.9037823	346.5457156	39.37832876	32.50135233	0.500472478	0.085850843	3.697673292	3.26772316	303.6545999	10.19442992	12.9009713	7.41363339	2.17930746	45.47718657	165.9057313
CG32369	3.744263206	3.125580155	7.161183811	3.125220839	3.848820789	5.591262647	6.791776134	4.575446181	3.218668237	2.785154603	3.459925973	4.544831331	3.389378907	2.648596595	5.126206489	3.200130411	2.840153073	3.204224055	5.438241853	3.899929049	3.317797243	4.839289049	6.366511178	5.862744664	6.32961599	5.992123917	5.865380906	6.314217093	6.476659733	6.310337053	5.931264548	5.128588552	4.374420521	3.543362166	4.191747689	3.801482996	1.574830217	2.870485018	1.476070066	1.159998766	9.309286395	6.872768709	11.51012155	10.87198506	5.917019583	0.714426297	8.905026045	0.923460561	8.413993699
CG32379	2.100680627	0.554777975	0.091547636	2.716107487	6.383636171	3.702650405	0.212183637	1.15323381	0.221010198	0.266357286	3.068631077	0.210540712	6.558318139	4.014523337	3.337795865	0.20792728	0.898253933	1.349506241	1.177528538	9.354432972	4.724152519	0	0	0	0.045259782	0.018703641	0.014555696	0	0	0	0.094911826	0.072460223	0.132008506	13.28959558	7.076302584	5.503856236	0.659442305	0.601821157	0	0	0	0	6.715776036	0	1.3128448	0.591411241	0.050474585	0	0
CG32444	5.263055574	5.661386662	35.07331198	9.14216722	29.22892212	42.3680924	36.65568356	21.18002801	17.06439789	14.5815802	31.10156809	53.93491427	29.86677313	34.99754459	25.24029915	73.04430715	22.51506784	48.10464565	197.9213657	27.19882195	28.13569347	160.5082244	60.25862521	182.6160786	249.6685422	123.3188468	197.0427905	138.5532689	233.4101935	344.6147622	182.9455914	172.7503823	219.3487619	213.4404973	140.0729756	167.6147916	335.5054241	50.67459239	1.220705487	0.5441281	4.519405353	1.612382173	5.663182405	43.87902168	30.18637472	0.471131501	0.929779585	68.99451565	8.703598494
CG3246	15.54577748	11.32034617	16.62496754	12.04419533	28.83226573	18.03295502	14.98729688	5.17055642	12.11923283	9.607684821	19.71381032	25.11166679	21.51704325	27.45940026	19.7877991	30.08135911	11.99116091	25.15946607	15.12648138	23.69183567	41.69217241	46.63898963	82.5178502	108.3593096	58.83239544	75.91137133	142.3381843	46.34404119	63.39656653	103.4029721	48.34124594	66.56165559	89.07384556	5.173787289	4.194882869	4.25830059	3.724838475	2.743005307	0.436846122	0.125787058	3.179306827	3.19544084	2.648312645	32.06562269	0.340938263	1.042661508	3.715897253	37.39321666	57.36273553
CG32483	4.387164889	2.334661044	0.879536983	6.479664908	14.58424766	15.26742561	0.324133015	0.484158446	2.258715014	0.752718951	10.1325955	2.772127889	19.15584839	12.24582294	11.19208356	1.39470788	1.682686731	4.660698355	6.496682223	24.302727	24.42551852	0.037219395	0.197905304	0.278479915	0	0.064788044	0.140628365	0.063398158	0.05554921	0.310637011	0.424972862	0.59792591	1.70859521	62.83528776	32.95269636	29.47122086	0.380283298	0.417127576	0.012961461	0.003401605	0.050027116	0.080106506	4.45565788	0	1.586203554	0.138539852	0.029589785	0	0.195727652
CG32521	14.45083103	13.76062759	87.01446821	17.98911383	20.45931469	27.13482075	38.53172993	69.30451991	16.66806993	12.01879448	20.71452393	22.12231922	24.81312652	20.11216672	24.96145788	42.95577779	21.0912757	41.36557199	31.48937122	23.08717101	25.67647126	120.1962476	114.2737464	113.1144458	120.4781246	145.6319886	101.0581587	131.2879771	169.3951126	117.6853124	67.38696652	100.3318267	104.8045635	9.011418537	10.91140039	7.82838662	4.295443485	14.08571796	17.64151277	18.25964196	25.88498606	69.96006178	5.477590273	152.1912841	12.53916474	1.635847218	96.00726715	45.45921665	55.44006327
CG32557	5.672379356	4.494657482	1.118556606	0.919241611	3.477602194	2.816443654	0.934384546	0.597029902	3.469976027	4.323538785	2.458334216	1.556332615	2.423025318	3.782085356	3.601226763	0.657206487	3.098664409	2.151130586	4.140514321	2.439586978	4.779819724	0.002405615	0.034881589	0	0.046082578	0	0.004638505	0	0.004175095	0.028431423	0.971220207	1.620942748	1.764086556	8.529209273	5.924545351	9.990801031	0	0	0.00143356	0.003283216	0.228733604	0.386713857	7.911484741	0.314916591	0.799035052	0.149702484	0	0	0.314884626
CG32599	0	0.600568145	0.417117285	0.338113853	0.973826396	0.292635554	0.177512279	0.188304519	0.588529612	0.80535887	0.468686391	1.242491819	0.784365148	0.525507092	0.58121626	0.382551297	0.214530835	0.745971432	1.703760287	0.851612794	0.309380852	0.043955782	0.063941919	0	0	0.004842416	0.065229086	0.009916673	0.026606131	0	0.070257365	0.242837546	0.261576663	0.915282191	0.515749183	0.928429261	1.062409312	0.299572415	0.14269303	0	0.031424517	0.04406137	0.825832849	0	0.34544043	0.609272414	0.027515962	0	0
CG32647	0.024130893	0.243429165	23.16125217	0.533707446	0.13677946	2.386662667	7.146593455	19.38907625	1.991573136	0.775047073	1.906386721	2.9910178	0.406289214	0.306441535	1.907783808	10.3014024	2.421319651	10.45287827	6.249845106	0.706262473	0.191820763	22.87976266	33.89362471	25.5792474	25.17706699	26.75444881	19.2790903	43.44566267	63.58569683	54.05088135	16.02846254	19.30259365	20.92230154	0.813758532	1.195041439	0.748981291	0.133987762	0.476744969	0.090250902	0.081419943	0.699532893	3.427543313	0.175307741	6.901424846	0.249408519	0.087393787	8.110472968	0.930600839	0.287332561
CG32713	0	0.288914741	4.801806853	2.776091693	1.150921837	1.214698109	1.687806211	3.525926716	0.805305213	0.239825327	2.101721117	5.8565748	1.056613691	0.802808131	1.479817884	4.702918737	2.269515675	5.986210356	6.394925839	1.044750073	0.319872031	0	0	0	0	0	0	0	0	0	0.09826799	0.056648811	0.020707868	0.460528754	0.392435303	0.283523687	53.46048078	6.848568406	0.046242234	0.047095929	0.150278662	0	0.108707391	0.130451238	19.68855034	0.232444961	0.091689169	6.532550013	3.520147277
CG32750	2.436124143	0.927188894	0.463409011	2.573652337	5.304388777	3.661171154	0.032310408	0	0.401225983	0.623321592	3.427693231	0.332552704	16.12834284	11.78212517	1.060944243	0.537833369	0.13200282	0.893946947	0.746338149	5.060129891	2.104337209	0.004337322	0.052206069	0.295490327	0.012906069	0.048330835	0.157063786	0.225123232	0.137183707	0.353347955	0.072798677	0.301748989	0.206790093	11.34610998	5.790421908	4.246838876	0.43621346	0.367362848	0	0	0.150800163	0	2.492889388	0	0.393772508	0	0.137737873	0	0
CG32751	1.260991032	2.383996766	0.69734049	3.893379485	3.377292846	2.548991826	2.289482335	0.0826322	0.538351129	0.010946681	1.699752941	1.859994377	6.749043546	4.775867924	1.758098692	0.16503373	0.242060638	0.472918175	1.233635649	1.759297196	1.68034389	0	0.009510917	0	0	0	0	0	0	0	0.073220736	0.126583336	0.113086473	8.889676128	6.270676628	6.450333037	0.128195968	0	0	0	0	0	0.863829887	0	0.13072587	0	0	0	0
CG32816	0.158234956	0.533761299	3.197218363	1.374750176	0.749017989	1.203649	1.354849532	1.461963578	1.250843482	1.120232449	1.162222503	0.852180665	1.080391386	0.995790814	0.790511903	2.186910707	0.902058541	1.211712732	1.120003076	0.938106413	0.27128361	2.478033717	1.298937745	0.975968899	4.069776377	1.388729924	0.734907367	3.913735881	2.375147874	1.344309504	1.552841013	1.256587164	0.809393329	0.513254168	0.44558296	0.452637915	0.336150872	6.00463624	5.484235008	4.342471383	1.766738683	0.512100238	0.223607139	0.146787368	1.010132925	0.061472787	22.32359212	28.10659477	0.32148211
CG3290	0	0.162340116	7.774910182	0.445253204	1.325787162	0.373844817	0.14298225	1.935018258	3.987758638	0.558734293	6.215456624	7.783128463	0.502833206	0	0.000751618	8.954048829	2.422078691	20.16805756	9.309190274	0.098482707	0.473832093	0.043822881	0	0.22935947	0.05636139	0.005467562	0.040521973	0.007049896	0	0	2.394754493	2.12134868	3.011543788	49.29938929	59.14333009	66.25907683	14.03304139	8.828951683	0.051193777	0.252123012	0.064384857	0	0.048599174	0	0.002183457	0	0	0	0
CG32984	0	0	2.393590306	0.052163493	0.032676157	0.140465487	0.762963137	1.00699273	0.139384988	0.025907091	0.410116602	1.041134068	0.038082923	0	0	0.848948164	0.090274164	1.44858882	2.362473171	0	0	0.037987728	0.075079534	0.043671731	0.085114423	0.016194138	0.030443896	0.138222305	0.039419299	0.05675433	2.689993406	3.698516907	4.859507553	0.634000875	2.35238379	1.48271798	0.088531354	1.242862895	0.002162564	0	0.062573091	0.042931176	0	0	0.140053949	0	0.075000174	0	0
CG33012	4.572595342	1.474326999	0.02641004	3.703426593	4.275151755	5.378252633	0.194725593	0.23829893	0.738993008	1.162117877	4.292560346	0.352217662	4.521386491	6.464646895	10.49210321	0.141887749	0.632276686	0.753362848	1.034231077	9.531919865	8.144661286	0	0	0	0	0	0	0	0	0	0.131574028	0.097934067	0.091054153	3.025208327	3.026516579	1.530842113	0.319105871	0.185694737	0.006328605	0	0.131889576	0	7.7401942	0.033493758	2.365630904	0.271946251	0.200404417	0.614634267	0.068283899
CG33109	0.025242261	0.047176784	55.37443892	0	0	1.981341332	13.78385736	34.56625771	5.233457705	6.075213977	14.12360129	13.25358554	0.122137886	0.190826089	0.225627609	23.8873472	8.220790723	44.80561508	38.92375964	0.041506465	0	0.331774101	0.922212236	1.005553984	0.426857485	3.080042631	0.73098264	0.713839768	0.089373994	0	85.17993457	153.017639	159.9732281	26.75705665	67.44854903	38.92149081	0	0	0	0.026944262	0.512422645	0	0	0	0	0	0.098786498	0	0
CG33110	1.005900163	1.665493035	17.10814292	0.583962019	0.76717947	2.467727201	3.428961557	13.31332258	5.896140867	3.204991202	2.485671073	4.28713126	0.926276762	1.370178771	0.634785434	3.951358883	7.202402245	9.358203982	10.52792263	1.366387104	1.790556336	20.47852681	12.44994076	11.71624921	16.29140551	12.59529815	13.9964059	30.54222609	31.38239362	46.12717863	31.72421275	32.99689603	29.2233739	1.708130595	1.788232507	0.65507827	2.781478399	14.13129467	0.075969432	0.012454104	0.686700481	0	0.208439765	0.060580874	2.126818159	0	0.424690399	2.030620266	0.342947402
CG33120	4.303756837	2.780648654	8.069040579	21.38018421	7.199086073	6.823200221	4.50752527	3.677994525	3.127528168	3.08748823	7.331746213	4.514089496	20.63093564	10.68345912	27.78332996	6.610447327	4.190280175	4.948028121	4.708455689	18.84663573	11.48583765	15.92536241	29.93512818	42.32078586	19.05496825	21.74361251	41.35044289	11.09082839	15.29982423	20.6400742	22.63868598	30.90541771	28.71560908	13.20348879	10.29314578	14.58024783	1.389469967	1.377417156	0.166412852	0.039664326	1.545318771	0.368319681	33.24673085	40.91832943	3.521255802	1.737592574	0.187436929	8.662776923	38.06413583
CG3323	2.589323454	3.370267832	18.0683903	3.678201023	2.053178163	7.631376095	11.50754152	8.784465871	5.250197273	5.848921997	4.980103789	11.9128225	1.427319113	1.239961853	2.527406073	6.478374897	4.663113002	18.66258459	16.83902177	2.054168606	2.172237735	0.025795567	0.033816258	0.199460464	0.020748591	0.011358807	0.013428524	0.260551169	0.064746006	0.255978076	0.373122545	0.506774456	1.155772602	1.555904886	1.126117357	0.308310224	119.7161369	40.35003605	0.931801905	0.666459419	1.039093237	1.051276244	0.694189897	0.92144491	71.99392581	0.2375578	0.709800348	13.57445034	18.46654921
CG3328	7.796787364	7.203337679	3.429426326	3.468947481	8.72217094	6.560963449	3.134899328	1.99963449	4.603400294	3.806900579	5.25575833	3.153976618	7.224326337	7.78411461	6.23680036	3.26730363	3.454851533	4.709900033	6.119195546	4.786254981	9.696996408	10.99643887	10.08483625	11.82459756	13.10639021	11.00567485	13.45447865	18.21397976	18.01598251	20.27112705	9.867908521	7.461974629	9.233742475	1.387030823	0.75139768	0.93613845	13.29113323	2.918558723	0.067964262	0.058767108	16.22711859	7.162606928	3.100791881	1.225479954	12.1533731	0.066192011	19.136057	15.08456418	3.378978572
CG3332	3.005032773	5.890105178	2.378582165	5.612635214	8.96925503	4.225606045	1.137587393	0.763217058	3.218820266	2.284751219	4.083745181	2.795004982	10.77203786	7.220557251	5.623779178	1.982211182	1.398523705	6.552466635	3.017079778	6.436532742	8.790338451	0.104655627	0	0	0.103190767	0	0	0.026817005	0.015795744	0	0.596013987	0.886707093	1.275214323	22.31868799	18.95299569	22.09456843	0.74013154	3.798443137	0.033241142	0.053963051	0.579750412	0.039090362	22.0202993	0.02311227	2.445039003	0.292136807	0	0	0.050742501
CG33337	0	0	0.100278531	0.013480916	0.03111261	0.037504608	0	0	0.008013692	0	0.080287917	0.098222954	1.269280173	0.162278122	0.182430299	0.072585732	0.004925301	0.362252199	0.156732297	0.498152922	0.384362018	0	0	0	0.004906113	0.010094771	0	0	0.027815822	0	0.071021424	0	0.04320933	0.771460977	0.568867638	0.569201698	0	0.048951426	0	0	0	0	0.125468979	0	0.083120112	0	0	0	0.110585552
CG33346	2.600883246	13.36514928	35.15362181	118.2089609	16.2868617	10.34811371	3.663123217	12.13983959	27.71186049	31.44892899	8.193809957	5.780696149	16.91491481	9.909868207	31.58980184	27.66827858	21.34765517	28.93121631	34.04864608	31.92252695	5.45337531	0.373680011	0.029619761	0.814084208	0.282014902	0.038090436	0.128011537	0.329092959	0.100642758	0.253079713	7.916086893	6.277643077	11.14999239	231.7964451	125.8766411	142.2879523	1.400064752	1.692940796	0.057902589	0.007463434	4.16981838	1.829070624	547.9278765	0.739182984	19.17329129	6.144662447	0.762372647	1.888733136	26.22154306
CG3344	59.73367177	40.3611584	20.95139342	55.61502506	109.3314761	73.22005332	4.610132399	3.250492421	18.30112223	16.28973379	68.36557369	14.21676148	132.3686782	105.4542782	98.67730088	9.155786422	13.63028044	28.0221265	49.70216592	172.3351874	176.7089681	0.647906984	0.030807042	0.741437705	1.216021898	0.041731047	0.10414796	0.368076698	0.246204767	0.110502698	3.230969617	2.671023289	7.467056894	419.2620447	254.1966578	286.2203203	3.192568888	2.57969563	0.012242989	0.014729334	0.531958706	0.311458488	180.6430312	0.164198863	27.56814572	7.598619413	0.321774203	0	0.014741424
CG33460	0.608985809	0.94627264	1.111862114	6.225678706	4.239120816	5.147068232	0.264519923	0.754662575	0	0.236007019	1.824025071	0.652800946	5.930237556	4.95789536	5.718486411	0.313145759	0.359962904	0.510597142	0.605699402	5.600821421	3.283841775	3.449914775	1.513383652	2.030689376	1.467690922	0.681261358	2.980469006	1.655900463	3.01426712	7.317718065	0.592260936	0.704142872	0.910375612	0.199980027	0	0.017169825	0.018002226	0	0	0	0.931166108	1.416991402	0.473483255	3.720950479	0.084176226	0	0.108575143	5.214489644	1.520204952
CG33468	0	1.153663405	4.506268958	1.677975765	1.148917639	3.822504785	10.31357796	2.376223096	0.40955559	0.40774518	2.224556151	4.670261398	2.576745435	1.604481503	1.293788604	0.933699947	1.697125683	1.716476423	1.633939827	2.742644104	1.253275805	0.258430902	0.265461845	0.048096494	1.382947206	0.129761051	1.390248441	1.592805162	1.16620503	0.679958256	0.651127577	1.020046456	1.880634066	6.140564012	3.51960365	3.150681229	0.272459692	0.443411388	0.32721415	0.775794116	0.036915362	0.142752144	1.376541756	0.277444446	0.811972878	0.036848524	0.298740453	0	0
CG33509	0.068953289	0	1.21396322	0.525850974	0.896677887	0.94439597	0.231796965	1.016049952	0.225363393	0.005669574	0.774143766	0.548318934	0.901194999	1.04278186	0.738096994	2.07758722	0.982013036	0.345446242	2.150052748	0.526612951	0.112159209	0.108575835	0.142267931	0.190137297	0.06492899	0.053267707	0.345712553	0.079346989	0.312522579	0.156345226	1.127259167	1.775643994	0.526686379	11.36744856	12.13219437	5.874490957	0.42669509	0.756664617	0.047051799	0.006173637	0	0	0.049937792	0	0.135622225	0	0.026985118	0	0
CG33510	0.232909501	1.654278483	0.309402125	1.907215944	1.991502629	4.126892011	0.045663884	0.096749042	0.32340521	0.058052593	2.080534964	0.13193329	3.625258162	3.495855404	3.790421524	0.85132128	0.115664167	1.230906436	0.966484846	7.502389752	3.013635651	0.015830645	0	0	0.033034975	0	0.013280197	0.009225679	0	0	0.197584962	0.18115605	0.288113167	13.63500262	15.37318496	4.533204927	0.003609043	0.195929527	0.013360906	0	0	0	2.779752806	1.136379998	0.354804107	0	0	0	0
CG3386	1.269848914	3.964830594	4.453481602	4.721639263	2.99299592	3.587159012	2.909311142	5.631317301	1.423520417	1.386737525	2.893208843	3.766918937	3.696708971	2.3897959	3.072068228	5.169783249	1.309434621	3.886747962	3.555062819	2.776029134	2.983002238	6.124772637	2.670819103	3.364681218	3.952050223	5.659359613	3.705857392	4.068872814	4.448707386	5.870557266	2.048991087	2.601230841	2.993097075	1.873151718	2.460528062	1.462592552	4.186169528	3.979827303	3.996033373	4.290883991	4.353276162	9.231327996	3.927745259	1.033029751	4.672762564	2.347583858	4.996164171	6.476344219	3.816364813
CG3394	5.932965474	5.022538643	3.489115069	24.44063942	21.76379751	11.32991632	9.770179408	3.287953753	11.67603685	10.53017546	9.599768997	13.09291977	5.322213305	10.67114526	8.276116127	7.61513062	6.739279279	7.577703502	10.60972704	17.21807236	10.57528424	1.544042095	2.036233132	2.392452066	2.214529666	2.045653239	3.548596719	3.418146805	3.983529379	3.653127066	2.137583588	2.370003516	3.494382184	7.402371042	4.800184887	4.222987316	41.4850969	4.787478904	15.02193734	11.04034282	4.213560934	0.966486948	86.60440622	23.2600136	14.27438341	32.21895061	0.319283648	5.529770971	23.16885751
CG33970	0.677520411	0.900996864	4.802706011	4.515932865	1.709839445	1.088749466	1.428304568	1.803031045	3.026666734	1.687172045	3.316789785	4.207369511	1.496793373	1.607525426	1.259511588	2.871545835	2.920597408	10.45505653	9.75025995	1.206936334	0.818479076	11.49288361	12.62943354	10.3809477	11.27378494	10.33370896	13.65838583	17.29528811	20.34251111	30.22637839	12.19026793	16.69788631	13.33328035	19.73010082	20.27171019	15.16499692	3.160681457	1.836895777	0.924809202	1.010670499	15.8385049	1.291018602	0.673416417	0	1.850881426	0.133336829	0.872610441	0.314133387	0.600746644
CG33978	1.049109981	2.207690218	1.09998189	8.464638893	3.49759691	4.530839405	2.463022275	0.847467903	0.483203326	0.412770615	3.473017919	1.005786988	7.485272651	4.577114133	9.958247817	0.854640611	0.647861713	1.090110833	1.391150671	5.039173798	2.100791163	3.364001961	1.455482854	1.20706334	5.869967093	2.073988814	1.486916629	5.398794727	2.393299806	2.595802432	4.603159924	2.07435001	1.379360452	0.264722599	0.421831209	0.229154132	0.012825282	0.339217891	0.025715512	0.033252374	14.18369663	3.279906328	0.840477031	0.209507659	11.44568146	0.12746583	10.75061913	12.14597433	2.309458744
CG34040	0	0	16.49830072	0	0	6.475413359	9.943790328	2.927285717	1.59763909	0.053849332	0.297517236	5.615772463	0	0	0	34.49490943	3.872875751	2.28153773	49.00042714	0	0	1.437835199	0	0	0	0	0	0.006482457	0	0	0.449450692	0.459929386	0.366924559	18.59845582	13.46690841	20.88946232	0.025605185	1.228939258	0.037302059	0.009772816	0	0	0.158102231	0	0	0	0	0	0
CG34043	1.738970118	1.292526501	9.806191151	4.909731851	4.297262119	5.025703609	3.256464725	10.59846979	0.275462778	0.244352844	4.051285396	1.953707406	12.8284036	5.450005044	9.751781115	8.146733247	0.708195316	6.059409304	8.501609346	10.00109779	3.86319616	0.26498882	0	0	0.097052389	0	0	0.019563541	0.024640494	0	2.7202991	1.688951207	2.610915531	84.81993607	48.06120544	36.82381269	4.04101842	4.571321414	0.184533282	0.07654002	0.09409314	0.078156813	2.38033185	0.027099317	0.153781195	0.080622054	0.016341318	0	0.373438074
CG34054	9.162982052	17.07494581	81.44078797	3.997476098	12.01781238	37.42321473	62.24635912	106.1709406	21.0142208	9.145891622	12.9552995	12.12427789	32.59176253	20.19009316	24.25250312	70.86654879	21.01221616	28.91680399	24.08188736	26.10889002	11.4430441	68.30345446	57.29044943	154.4983089	72.07207157	74.80760756	120.6310341	57.51979366	80.99894564	122.0664221	113.8832414	70.46507625	290.356427	7.018182967	4.126680282	3.58736247	11.06949443	15.02216536	0.412569981	0.89947401	1.342548843	0.056466404	0.513208504	50.82394408	1.310936744	0.973670743	0.035035301	1.148830673	0.987790592
CG34114	0.260220664	0.531599298	1.594464776	0.110854058	0.129798907	0.486142506	0.909439298	2.289851201	1.435845572	0.964159715	0.43013181	0.764020189	0.182527015	0.115178892	0.092274165	0.724199406	1.120090969	0.81385792	0.968292525	0.032226058	0.065476265	7.74172515	5.720200864	3.866216694	7.788279716	9.477355976	3.885466936	11.35999263	10.60644065	8.516076926	0.692659329	0.517144389	0.362248933	0.026288071	0.046294604	0.011226542	0.025165071	0.341363317	0.032114813	0.01426014	1.294519098	7.244188576	0.010475874	0.009479777	0.561422089	0	22.29972829	2.418608528	0.210348843
CG34126	2.438554193	2.276260267	5.943525258	2.839551459	3.421013381	7.547052928	12.77380238	5.695733737	6.442409658	3.934848631	6.532155633	17.00913083	4.358352548	3.871251854	5.103503137	13.05683512	5.473153353	10.48353328	13.9039908	3.221399316	3.901251286	8.97593476	8.09728692	11.52518381	8.962016121	10.17401965	12.87529007	15.49209301	13.00446976	18.57074416	5.331196132	5.14042516	7.420240709	3.162869476	3.616783275	5.003725762	2.649957904	5.929614026	17.44925746	14.40453245	7.415028927	8.293515939	5.840506912	3.86405909	7.803989304	0.6580905	12.38668157	3.595846547	7.941551113
CG34172	0	0	16.2534857	0	0.053115132	4.629073369	12.82071164	9.079684627	5.20544876	0.778043784	21.78573744	23.77601582	0	0.304084655	0.089425141	11.25213468	4.829350885	54.30225295	34.67996633	0	0	26.48552031	11.79471566	3.744441822	33.16886878	6.78362166	4.412715503	20.62024907	15.13474175	10.46717005	151.2003861	74.0830256	18.29555087	3.161155158	1.663170596	0.203983105	4.489876289	2.453925758	0	0.536918144	0.180761516	0	0	0	0.481387569	0	3.113676462	15.86418354	0
CG34198	10.12088779	14.85374157	16.19382021	13.45341402	52.7845122	53.23740046	40.72148182	13.73886187	18.14850346	10.4106788	38.42725681	34.01053852	57.33321546	74.2615269	33.28199159	20.06101289	14.19197969	18.12475244	55.88072221	65.26925598	78.05010111	0.728866614	0.055951024	0.163500213	0.154241936	0	0	0.023145431	0.23909734	0.320794259	2.249147471	1.783548161	4.511065237	245.192206	158.648343	191.4451725	6.422276792	6.928261123	0.066706288	0.136779387	0.31762079	0.06216379	28.81666803	1.296691447	13.52659856	0.127123284	0.476368455	0	0.119696294
CG34203	0	0	3.370120349	0.037111945	0	0.265128383	0.583111384	0.850695529	0.178308892	0.031304358	0.750434271	1.136968099	0	0.121563397	0.061968819	3.299741695	0.060751282	8.95767442	2.204710114	0	0	0	0	0	0.020171536	0.035126133	0	0.09047089	0	0	0.032538946	0.659606258	0.848670934	7.395145343	6.047104619	7.374181346	0.516456773	0.574169631	0	0	0.043512565	0.060822125	0	0	0.048592112	0.415453562	0	0	0
CG34215	0.218395808	1.263399286	6.430006792	10.20431714	13.10981945	6.788393297	0.830783171	5.70332078	0.037616633	0.763380823	8.456559304	1.174505209	28.01301246	10.25934966	22.6001053	1.064372608	0.046239169	2.818968614	0.782114373	17.75951697	15.4689054	4.097344337	1.987530237	9.391970293	0.091122959	2.408171347	6.186722359	0.88844102	4.277346456	9.299527455	6.068585094	5.177149019	11.71389173	2.438912566	2.100327428	0.638471227	0.388304074	17.27131477	0	0	0.554426433	0	0	21.92222799	0.34379931	0.070561913	0	6.349242012	0.584926996
CG34227	1562.187105	797.5525442	61.54702391	1912.294009	1432.540926	201.1744516	0.610111638	19.59613499	294.9420093	369.2897383	266.8264213	4.266187338	355.9769126	560.4887159	806.1287903	2.770070596	240.0756133	2.101276415	14.62949781	535.3868742	211.3841739	13.17084246	16.83277507	107.8228544	33.64945181	8.528988202	75.8511954	22.84575636	112.8449313	530.0245782	11.07450503	17.90019846	111.8480159	3.69114207	2.501041218	20.56523963	0.367636988	3.115292048	0	0.009604933	3438.371969	102.3842392	5.622185786	3.823405197	1.33027626	63.256962	0.354136599	12.32863378	0.696233887
CG34256	0	0	1.766364006	0.626104078	0.007290224	0.979446673	0.579243902	2.165512495	0.068040718	0	2.350775081	2.511680768	0.220909057	0.206888121	0	0.984589874	0	2.59675201	1.469091232	0.553630049	0	0.131927938	1.288423328	1.371611637	0.601361907	0.591474443	0.873478476	1.398088084	0.642870678	0.788893316	1.442251726	1.171225755	0.765532172	0.377118184	0.328727259	0.101370286	3.350203055	60.59347201	0.088978183	0.011732188	0.48402137	0.082920802	0.234939698	0.330996852	0.12286252	0.015083085	0.674538467	0	2.247461369
CG34281	1.733932805	0	0.099495105	0	0	0	0.183365156	0	0	0.045326101	0	0.193955727	0.025814936	0.396030754	0.306077229	0	0.131944191	0.09370182	0.55216614	0.975726203	0	0.078523595	0	0	0.291345879	0	0	0	0.255252566	0	0.047113683	0	0	0	0	0.302036887	0.999891787	0	0	0	0.056780092	0	0	0	0.484536319	0	0	0	0.478785176
CG34288	2.162611736	2.2990411	2.871284374	17.30068935	26.29995535	14.01373131	13.01591898	6.293517862	0.266810549	2.186992165	10.16715341	4.410807553	45.93008871	22.99489903	13.27501502	5.208601162	1.124938326	5.512351347	5.7396358	39.48366686	22.79258317	0.075583178	0.221910238	0.270673821	0.093200082	0.009036508	0.279720121	0.058373911	0.686052634	1.369891955	0.888551145	1.187349572	1.482439362	60.04137121	45.94801737	31.90869757	0.495532591	2.117478462	0.382411164	0.024557264	0	0.199371351	26.70289246	0.597110514	3.646840436	1.376772846	0.154314476	3.400636939	0.091178515
CG34291	52.62503177	37.50403591	0.52848525	39.56462452	79.88702877	55.62219612	0.093928189	0.43859959	0.21415509	1.044832547	53.14480501	1.896427495	116.7556104	95.52129062	145.338436	0	3.089014378	1.793900241	2.042612834	90.20418426	166.5889542	2.526496175	1.109951203	1.214245456	2.131051163	0.531961118	1.265386417	4.594754002	1.262579678	0.234845466	5.75328165	2.657765218	5.16281636	0	0	0.302552122	0.149566179	0.464514815	0.030642113	0	2.064692663	0.168746542	2.491967046	351.9054751	0.343488451	1.93737538	0	0	1.162032925
CG34301	5.246547158	6.000125458	0.045483476	25.42114286	37.07346142	26.13808443	0.137562771	0	1.129276828	1.205987474	14.52927132	0.885926791	57.75063845	22.51068552	31.72127582	0.014818201	0.200560147	1.284060145	0.724323951	53.82307203	29.49000194	0.122009325	0.112660878	0.528300415	0.048832371	0.045546012	0	0	0.805607254	0.269971597	0.772349724	0.595081061	0.485508735	25.61067262	17.77183479	8.272912808	9.522778921	0.847749698	0	0	0.420906046	0.100646136	34.00830813	1.126362495	3.451264015	0.829640125	0	0	0
CG34324	5.082266788	13.32819616	2911.879392	0.643390285	5.713397891	1367.114061	1479.71995	818.9642685	3229.123742	1716.351609	1226.77522	1717.689377	0.620842413	52.60028045	0.340978446	7130.596551	2991.706687	5777.303426	3625.848759	2.665180242	3.074938058	2.193364273	35.61244412	87.74919016	39.084813	1.8722003	2.421762411	1.343373038	0.040874034	0.196722913	1514.772507	1563.827196	2610.017606	6013.304979	7470.885482	8894.366605	6.462158877	13.68165613	0.258750496	2.073897315	23.1890428	0.034366973	0.416226534	0	1.75623289	0.011157782	0.726381157	3.528017789	0.494355425
CG34327	0.077121062	0	3.834829474	0.135684638	1.100037643	0.042584014	0.383111983	6.388124945	4.319241794	1.037058417	1.261015017	1.155560836	0.204511094	0.029357455	0.052779026	0.403332481	3.205654493	2.117909886	1.547633479	0.15785629	0.827670809	29.1833745	0.380849367	0	101.399559	0.92787377	0.11400769	78.40761755	1.869291605	0.24807971	173.9528788	28.61981547	3.1041887	3.653135455	0.784326796	0.133218624	0	0.089471528	0.031523647	0.027358447	0.317410714	0	0.02205204	0.119342617	0	0	1.834884832	8.644695187	0
CG34331	34.74116566	21.48136718	9.146818042	27.0504232	36.91226876	26.43838698	5.732246033	4.289033388	4.090943357	6.60737095	21.83539843	9.172879433	21.58384393	31.86201387	27.09211054	8.175729945	8.678880113	10.807083	12.55869867	27.52189029	43.52386978	27.91740903	31.54806076	73.17972907	41.03869443	43.46308983	79.6413481	39.40767486	47.11952926	62.1741836	39.14609917	30.96377862	47.70049855	4.612211589	1.764032408	1.472413295	0.915520645	1.374167075	0.08775202	0.045854498	5.241262335	1.90265697	1.89704221	80.86435722	0.366527184	2.704132346	0.585233859	30.76894914	9.301656571
CG34340	0.383907084	1.068671642	1.214054522	0.414219169	0.316029641	0.292052693	0.532599567	0.97583698	1.650924628	0.898278883	0.199695859	0.35643679	0.138661818	0.08676379	0.461424759	0.766786098	0.787158185	0.872230103	0.880227666	0.319901776	0.330678449	4.178041912	3.834382919	3.12866129	3.381178945	5.470399004	2.865750306	5.877422488	7.285640642	4.836083384	0.785835453	1.194666965	0.942839951	0	0.077425284	0.019072472	0.038846169	0.843175076	0.004715267	0.001588092	1.862289297	15.36195098	0	0.47427478	2.5527293	0.021827551	11.18315777	3.087270517	0.374962015
CG34380	4.22992636	4.558672586	9.490747816	5.559626166	1.530176512	2.58763903	4.173856001	5.778999909	11.28068495	10.16534881	1.661931605	2.664320909	1.570047632	1.309301778	2.269372202	3.939006461	7.016016499	4.452805194	5.114061594	1.291178464	0.654265448	21.95648163	18.07023794	15.05321402	21.62910953	22.39774458	13.11972535	30.83039975	33.31571755	28.97500087	3.827565426	3.788463975	2.796618797	5.557651525	4.925404323	2.909327843	0.443045619	4.222370783	0.139017513	0.116055314	29.31484848	123.1554743	3.951701149	0.740257847	25.45775856	0.151543178	112.0605793	26.59869225	12.76042016
CG34383	3.756669033	3.816215796	11.30974778	1.437247664	0.981443061	3.353382183	8.814879353	8.528441604	7.220924872	6.227032814	2.37313671	3.914668547	0.975320553	0.878083706	1.427693237	4.513988892	6.764161838	5.005038308	5.193688809	0.868353371	0.540268609	19.03989805	14.59099109	8.301620356	18.11460117	18.61596616	7.702912133	28.73365429	23.44734275	17.39422372	7.309260377	6.605587947	4.555632057	1.123133349	2.192362073	1.156504058	0.491650616	6.784940107	1.31156215	1.71933137	13.24299855	20.70375176	0.447704451	0.345870068	12.44036898	0.047896545	69.02722519	24.95815147	3.9060519
CG34384	0.552465177	0.232996392	1.913062059	0.217326687	0.121647242	0.515773122	1.002374706	1.654797676	0.730001062	1.345458329	0.296793593	0.617619002	0.154137966	0.116927729	0.208672243	0.503500165	1.150394742	1.370535879	1.544454136	0.047887756	0.095236153	6.612055435	6.509135346	4.802332046	6.236410785	6.673958498	4.828498696	10.95464618	11.04215123	8.873528999	0.579334307	0.516415159	0.437100435	0	0.054379707	0.01100669	2.150605831	0.765951217	0.028285092	0.013145173	1.153732258	7.395908664	0.045761826	0.036430899	1.319863245	0.00220644	13.10505454	0.444986088	0.487134101
CG34393	0.046283289	0.930847422	0.349932643	0.063917549	0	0.109478761	0.615038088	0.526266679	0.824163452	0.929285737	0.079177334	0.466004723	0.149626511	0.227172229	0.112638343	0.262141353	0.656412907	0.601265274	0.968916919	0.041857608	0.025411595	2.491304451	2.480059775	2.843122889	3.519434628	3.971444493	2.988457415	5.314282733	5.252394115	5.051167332	0.287124041	0.355090465	0.225540451	0	0.081233045	0	1.128470472	0.408067362	0	0	0.695748434	2.339908924	0.043033001	0.048060115	0.499496694	0.031314164	10.90951593	0.015389558	0.07078418
CG34398	9.41477191	10.07269605	10.68486779	4.589590559	3.55166597	6.456471579	9.307323007	5.127038551	15.7069775	13.22562143	5.08077392	5.631517831	3.218789077	3.05632078	4.051409143	6.739822136	11.58028995	11.72696458	10.17953751	2.059169248	3.444035941	22.8571031	11.63878859	10.88212057	27.09609388	17.50242001	10.34091838	29.87856327	19.31282116	17.52435923	29.89130355	22.75087004	21.30796438	1.868670163	3.013999707	2.294698659	1.098535812	0.790451715	0.097863927	0.097477883	35.12395848	5.230370203	7.988355278	1.258079302	18.31700775	1.02489921	9.679601805	23.76274259	3.792017738
CG34417	19.93424003	22.16809832	34.04014454	15.11771493	9.584738697	17.71058508	16.26857589	21.22302066	18.34327796	15.41080511	12.7839131	10.49276342	12.8220701	11.73676807	12.4003989	20.251479	18.13201294	19.13445469	20.14562538	7.612591526	6.819941922	40.0134814	25.39869737	19.22378015	40.4931152	36.68602193	19.82358551	43.54545237	34.61632392	30.94868784	38.75339734	37.46562013	38.4872114	9.461707023	15.37329304	10.83162942	1.739596418	10.36146021	9.086463224	10.72859136	139.8999302	11.75568677	20.50005506	38.1346441	15.63612848	1.614953191	6.882597396	10.49311156	8.834299867
CG34423	14.76548989	9.25069041	27.22728224	31.57035643	37.35376682	46.23318521	100.246735	17.37384598	6.656121354	5.959055424	31.69917802	47.16075353	26.83116561	22.36177271	41.71342296	56.10880523	5.25864397	34.91538663	46.87403581	28.86898959	26.8609902	16.85452729	23.61996986	33.68973737	15.3549344	22.54759042	29.86519975	16.93117842	36.59007233	55.72071881	108.0461242	100.2982995	219.1803282	40.01152994	38.34559828	32.03402194	18.22847166	38.41593425	3.949302486	4.216858532	24.21935553	13.72907991	28.55739678	59.13714168	8.122586941	16.65086083	12.26044961	69.29162012	32.07997084
CG34445	12.68437706	6.027503513	1.396474872	13.81042396	18.1177143	8.622027834	0.888471841	2.447574843	0.541642008	0.241827166	8.540980549	1.457606196	26.50910334	20.45120141	18.27848556	1.439499631	1.914254278	2.151952823	1.839052988	16.82142045	24.08346159	3.378355489	1.060024758	1.106986976	2.733470853	0.681255649	0.556440247	2.457840782	1.951044955	2.195448138	3.293630581	2.567338789	1.207650744	2.619282511	1.416964567	0.650199346	2.931093541	2.436125495	1.111068486	0.161881987	5.732478342	1.394746041	0.68861576	0	1.935769467	1.319451325	1.405746285	3.919866515	0.334034469
CG3505	6.968273288	10.34021888	4.094434708	21.95778442	19.74218606	17.9472483	3.38239158	2.93434202	8.994169738	6.922705183	9.357781732	7.227685903	16.30007816	23.84869515	16.94781768	5.087940425	5.590673694	6.022547663	10.9203546	17.76950238	20.13629849	7.384347017	10.45648113	17.15732247	10.35166787	7.869487543	26.6381966	11.4892564	12.48388149	25.15020062	11.28863729	9.155255578	14.72384338	1.705918899	1.097874668	1.387547722	0.81976045	1.222809973	0.220797693	0.563469204	19.56539419	0.822315441	1.313909052	35.84403164	0.169418611	0.379504594	0.501081522	16.90301892	92.85756737
CG3597	0.189885596	0.778956159	6.422556903	2.706389395	1.391966133	3.007050866	4.805934401	0.756109808	3.82061137	1.819165599	7.704627057	9.765615518	2.665517055	2.458728244	3.527277374	8.721103829	3.964719348	11.7696783	15.05794121	1.891318909	1.690583139	42.2919049	62.12110202	75.4576574	62.5777754	54.13082372	89.86654071	25.76525766	42.62006815	39.47356173	38.23379611	56.41196219	50.13809163	6.04867079	5.151866799	3.592116735	2.741080524	2.879115625	0.304809212	0.037633404	1.375904426	0.013355885	0.279685023	9.52984417	0.056653284	0.103843539	0.091155124	11.85413794	27.87425607
CG3630	4.846216215	8.102218154	17.71091816	7.503295753	9.190624508	8.519627228	11.96638956	5.812140246	6.425030021	7.707077336	15.5273963	21.14235121	10.29282005	8.025142889	11.32467283	12.51825598	6.380988614	18.69462251	18.59899589	7.164326438	8.910904443	12.63368632	9.192349919	9.567335322	18.06520033	8.520322544	8.449198911	16.35026106	12.99181085	10.79337183	89.59721771	77.92188462	60.16987664	1.625425838	1.492336459	0.970442219	1.02041973	0.351210589	11.98189583	6.919537444	29.6798752	2.979443875	2.00575182	0.341318779	6.056623566	0.197900797	1.231501156	3.720574331	2.882408404
CG3690	1.855336412	2.405967356	2.339939036	6.589501017	9.254120079	10.17792854	1.454603563	0.67747464	1.360355165	0.943806524	5.871354673	2.017047359	5.533934392	10.84412865	2.890199935	3.27810087	2.031364787	4.566242188	14.17996063	10.209326	5.71344909	0.011732708	0.005921665	0	0.00870098	0.003799636	0.006971751	0.014673424	0.089674703	0	1.334589763	1.983198764	1.211101044	40.00537873	36.11987998	28.92537729	6.559323754	2.401407705	0.068615478	0.02985729	0.125340518	0	15.72879436	0	0.158054967	0.215712542	0.044903653	0	0.45627765
CG3699	18.78908295	15.29980388	4.598548358	16.08625689	81.29882207	57.16433329	8.831802814	3.531963537	13.8316649	11.42843633	41.887456	10.54928243	73.30641363	84.17325877	50.71161584	25.12815535	9.220453633	12.64838685	51.21435468	98.44748673	144.191451	40.92522508	9.015034408	43.35866506	56.78754118	27.27645884	49.66719361	41.03567154	61.88182594	81.83910153	31.36876746	30.10668775	33.99251231	111.1559548	53.54875351	88.79456698	12.13261303	8.203442418	0.246225191	0.08666495	1.006638842	0	12.46382711	4.958324893	4.440016726	0.506922937	1.190414345	19.35750272	76.03401641
CG3790	0	0	0.023748506	0.010758207	0	0.012798857	0.326221453	0	0.019102503	0	0.438890717	0.384872754	0.087862305	0.008867441	0	0	0	0.055618422	0.22787751	0.040218856	0	0.789305722	1.158560856	1.109895594	2.298257235	0.516929031	1.585037882	3.152040725	1.47122726	2.230836508	0	0	0	0.30119346	0.065881521	0.171314009	0	0	0.009521741	0	0	0.01763144	0.050086867	0	0	0	0.065424801	0	0
CG3819	30.21169339	20.03740103	30.07695342	97.30871122	95.03945808	80.28917179	0.738508752	5.746428849	15.28356775	17.29082285	61.43708096	10.67789738	174.7298415	105.8348905	138.762912	14.39604921	15.11439351	26.29370081	35.56282766	313.5529807	195.2413863	0.092704792	0.804186762	1.39131788	0.615037583	0.112344693	0.197953181	0.349756847	0.153671326	0.180522532	24.27906377	32.55287764	30.17211301	337.7337604	248.1203695	202.5419481	0.191643497	0.493803333	0.025537101	0	0.835607132	0.083293354	208.9103527	0.328661661	3.895439388	7.287428911	0.182463538	0	0
CG3835	50.81301001	25.20175901	17.71724844	17.82753454	67.41008988	46.09298899	11.19867867	8.173531882	9.260659917	8.068729484	43.74349951	20.29893097	65.33583581	67.06690562	60.74328178	28.64449064	11.54573464	27.33701824	35.33466567	57.68175158	89.39559446	21.55068513	28.77865674	53.31211362	24.39438499	29.43833788	68.01317338	28.31002214	35.16557381	51.65561467	39.36147403	40.16828908	70.4026195	94.83983149	52.18959782	66.69737714	14.1203093	15.80510704	2.316715061	2.303764397	6.162425253	1.446696021	16.12631276	13.28761973	5.355209388	0.584703321	1.492479481	9.934794982	5.471572664
CG3841	0.267612618	2.106020869	2.46822715	3.984523901	4.303543237	3.517390336	1.107628212	1.935605942	0.157408909	0.199951068	2.250957469	1.04719912	7.305989464	3.129131883	4.320441083	1.095093188	0.667157133	2.072058511	4.212778466	7.060308638	3.421418483	0.015243405	0	0	0.005371348	0	0	0.018090681	0	0.096201153	0.333192691	0.316296617	0.234793109	38.63781585	25.8254007	20.12337424	12.5625176	1.844853219	0	0	0.069090939	0.035126238	0.986222357	0	5.377710753	0.208350227	0.019967437	0	1.296667388
CG3868	123.7879618	87.92666483	23.13097685	236.2461854	299.7391845	236.6254861	12.16478978	7.329236652	32.8485201	41.05967688	155.2629994	25.39361639	380.5007231	357.1486554	384.9642676	7.363411856	21.66098539	35.56746578	32.94041605	420.59092	401.9515601	0.305857654	0.011955503	0.363747827	0.594216697	0.021048586	0.056222422	0.028704969	0	0.024269915	5.794586063	3.218618197	7.158278278	510.3123303	276.3144199	338.6418367	2.802398095	10.87751637	0.07146813	0.017225717	1.751153348	0.164907955	528.8519633	1.88093442	72.7308355	7.425583479	0.373326973	0	0.920609747
CG3906	0.090605327	0.430866408	158.5777215	0	1.316350421	73.072087	79.34666658	59.52465045	74.58963915	68.17557434	97.60593442	164.8512026	0.112608418	1.606284905	0.214388195	340.7508325	80.43458025	269.1525495	366.7504584	3.693317183	0.388564349	0.047751461	4.26158985	7.225567339	3.040631438	0.049855073	0.475898012	0.114225988	0	0.325827998	119.0895194	125.645995	178.237094	834.531646	580.2294613	649.5474952	1.724481021	1.971921524	0.020665274	0.357689129	0.7378524	0	0.021968647	0	0.129733023	0	0.095125585	0.048658475	0
CG3921	2.371274285	1.899158767	2.740605247	5.024059553	2.62894756	3.666121947	4.268555253	2.070911093	2.135594125	2.197334407	2.534044263	3.143640651	3.873549562	2.663320341	4.211767357	1.486991274	1.988574612	2.076730736	2.973699263	3.413001115	1.814648702	1.506048949	1.284674402	1.47227786	2.32781458	1.11721213	1.614669359	2.665680042	1.664701496	3.045173843	1.980417888	1.713109941	2.302204666	5.021197882	6.190220107	7.177749857	0.544558811	0.9750569	1.25178889	1.283487325	13.55400131	3.716289261	10.68870784	1.503792354	14.42094846	1.753748102	5.997342192	3.424542701	2.654141146
CG3961	7.969911362	6.378979608	21.4455445	22.31110482	15.90259013	13.31566093	7.860139187	17.01687877	4.114930689	3.495815086	9.890846059	6.588824155	20.9322555	11.18249957	19.61849171	8.636777219	5.24577819	17.83087063	15.8188788	12.41869638	8.788985278	55.73601215	34.9567269	34.79622252	67.47153316	48.08149959	32.99128732	75.51897546	59.66763798	51.74051695	42.00628555	37.91900366	29.22739811	8.914273692	8.399894036	5.948157959	0.319915743	1.194621156	1.081252246	0.901424376	6.633481376	7.888997405	9.017451176	96.7905653	2.203727998	1.236502804	13.61778623	34.30993766	37.47060597
CG3987	120.7301103	95.22449118	40.69845668	84.12341353	138.9918505	91.61595614	27.36098314	25.1037566	27.83662176	28.39259621	70.96234365	20.03073527	163.8558615	136.5708136	105.1287487	17.83145445	31.95427394	27.29804925	35.9321906	171.9235454	139.7543711	0.695607651	0.197502912	0.382866022	0.869204066	0.094680126	0.18338387	2.060916764	0.487813889	0.330529647	3.205907786	2.407855092	4.260789213	248.146045	197.8968318	222.006377	6.175676799	7.229751559	0.79676456	0.59346332	1.53419623	0.551343301	238.1036998	0.070246682	25.01385536	7.261900871	0.349789779	3.556629036	1.336617566
CG4000	9.662884282	11.54117337	33.24665626	10.88633881	8.191272286	4.968580237	6.476807404	8.516565641	97.48312569	39.67064197	46.93364217	55.89748997	1.627367905	3.112428527	2.718616953	18.45330602	26.52468073	92.84800342	107.1228116	4.552669506	1.797551305	494.1149192	42.92838559	16.34373725	705.2686107	85.82322516	19.72283174	665.4192423	57.44951286	26.55274287	919.6018109	265.2274405	107.8587537	7.23610182	1.555091741	0.83181626	1.330590005	0.685550538	0.154106643	0.200440339	11.76913513	0.033648857	0	0	0.100100389	0.148404779	0.422844509	2.216534133	0
CG4009	0.023473976	0.014472039	0.917504766	0.076409862	0.108281764	0.042938136	0.003067585	0.684462886	7.102259618	5.511066201	27.32468871	25.51171141	0.013105594	0	0.049957577	0	6.45715941	5.358866449	0	0.019142765	0	0	0	0	0.003061428	0.083019771	0	0.015441177	0	0	1.090531684	3.627075698	2.577137995	1.527081922	2.11923815	1.156217093	0.047293294	0.069408579	11.45385512	35.07205049	0	0	0	0.030468934	0.091528926	0	0.055119752	0	0.290122015
CG40178	0.090184456	0.115360416	0.961782939	1.281485256	0.498685834	0.527536912	0.919467336	1.214458821	0.181436188	0.093738109	0.416380198	0.548439288	0.753360227	0.317115695	0.829385503	1.112839728	0.312646104	1.165586974	0.691285597	0.861054901	0.282343677	2.818089415	2.778421938	2.230549355	3.705151486	2.898297273	2.603333266	4.232299776	5.249234479	3.693839484	0.837724269	0.909167485	0.545628274	0.604475757	0.550437112	0.440608702	0.415017604	0.981622172	0.949273572	0.499667389	0.920226016	3.591418951	0.715538496	0.30696264	1.336385254	0.34178457	10.24183805	1.675690091	0.519448314
CG40470	0.01651203	0	3.026764459	0.941964064	0.074342038	0.557880489	1.050256337	2.215511607	0.287442702	0.134850879	0.393612115	0.44692906	0.56449682	0.394821967	0.376101489	0.513685451	0.165190783	1.079486296	0.875963533	0.493260294	0.111844325	3.262778118	5.839938694	3.450371217	5.642249061	6.29938986	3.680491082	7.284281978	11.03157422	9.801249448	0.797962222	0.867844705	0.598211049	0	0.017811447	0	0.289838187	0.213494622	0.222167114	0.070136155	1.201384358	8.379646753	0.027927585	0	0.867861537	0.0105832	9.905807711	1.013121291	0.164887041
CG40486	8.319664885	3.047147072	3.169220511	7.898344187	6.165092205	3.71615806	1.213509278	0.324324263	2.504133899	0.537295469	3.830032273	2.811136345	5.435547041	7.216579245	6.618235472	1.654884179	1.160943774	6.158947582	7.101505996	7.274825697	16.35677707	1.816222387	2.080958435	3.512550705	2.041979366	2.841167012	3.391052274	4.130602985	3.578593349	6.07051809	6.230079846	3.683208871	2.516921844	8.272053626	4.024916589	2.268843661	8.921910768	3.302647707	0.399318147	0.024468874	3.609715378	0.066694809	0.530773305	0.307352417	0.166904883	0.011463632	0	2.480640426	0.050690242
CG4053	5.969605997	3.523740202	1.703345971	5.481498498	18.9265252	6.507540999	0.024692219	0	1.088238192	1.078363205	9.116270155	1.031689859	17.73832437	14.85121988	14.20646609	1.400986837	0.43376148	2.648752548	3.139655632	24.20133801	25.24745262	0.083392251	0	0	0.033951687	0	0	0	0	0	0.036511916	0.079639435	0.296647594	28.77079513	16.0478887	12.15149682	0.306014581	0.13760504	0	0	0	0	5.367289692	0	1.63709205	0	0	0	0
CG4066	0.014288202	0	1.880279463	0.010494814	0.113065012	0.11217126	0	2.647330094	3.960728446	4.559234406	4.374775865	2.188686978	0	0	0	0.074420324	5.173451759	0.657819057	0.179119166	0	0	0.115207881	0.080818484	0.197887371	0.029898453	0.078008134	0.058365118	0.04022688	0.204124397	0.139472605	0.539618553	3.793645277	1.94647003	1.296259276	0.708160171	0.807503206	0	0	3.322272146	13.92135498	0.077874419	0.018142222	0	0.498436508	0.022370315	0	0.875162009	0	0.048251439
CG4115	7.10675665	4.001863593	2.6624989	11.36960809	12.40117975	14.97753837	2.669691605	1.059479978	1.759813671	1.685720004	11.43638356	2.560543561	16.50834803	17.44902237	9.652787887	1.534781003	2.37448277	4.558466143	7.679611936	15.72815511	22.36415953	1.986789269	2.243129259	2.107293227	5.989806128	1.907548817	2.586117116	2.713280494	4.674795263	2.355119985	1.658964032	2.283028244	1.684828086	10.96518427	5.610577215	3.093597879	0.344217394	0.662975479	0.072646249	0.008455912	5.048811002	1.228194337	2.480568234	2.621402142	3.723656668	0.167490062	27.79080654	52.41701047	0.800867875
CG41520	0.226049585	0.286729744	5.123992507	1.652167715	1.451435006	1.979115533	1.112758039	2.350843178	0.530316357	0.307822313	1.007015593	0.974298467	3.200871505	1.317841159	2.428949035	2.072653497	0.762413114	2.301027615	1.941336351	1.298306703	0.785735495	6.686233825	4.858452037	4.205914639	8.635919708	5.027002065	3.327677052	8.803943637	8.595118917	5.94533617	7.882046177	8.707407122	5.29691398	1.41468506	1.40056978	0.986116373	6.85559627	5.727651138	0.277531627	0.157809905	1.487024053	0.224380609	0.254235442	0	5.14461519	0.073854792	14.10402442	12.95900535	0.823283468
CG4213	4.110585572	5.688628636	54.69044456	7.216143783	4.974238677	13.54125476	29.02358364	32.28727445	3.847610859	3.921252171	7.542548135	15.62897129	6.269710864	5.414221072	10.73871608	24.41893152	4.856445233	20.53159308	28.28979384	4.740740341	4.532132011	4.648999998	3.257310537	1.390330165	3.718096946	4.583204941	1.815815239	5.690298757	3.200232598	2.820367999	51.82539107	40.80686549	20.42883472	0.728702241	1.210655039	0.508902776	12.47231357	4.590710928	0.047191943	0.104064091	33.89794749	0.918577329	3.615015224	0.223169838	14.42454497	0.246105592	0.935787296	3.645394642	3.57205912
CG42232	6.761042151	5.312572904	15.17789857	5.032370483	3.661030385	23.16692905	58.32665937	31.5272383	13.99969434	11.14039584	15.87087478	39.25254602	3.555314638	4.378948518	4.496342019	42.6405746	18.21202936	33.02418931	24.77884347	3.772795549	2.848109156	5.949478513	4.22765853	5.195600584	4.862786941	5.830889912	4.39632631	8.050033343	7.390043362	7.898634257	3.686368684	6.267536914	5.653494959	2.184524167	3.916337982	2.503757412	24.82038345	18.6395209	75.9462037	70.44269001	27.143639	52.34245502	3.494512375	3.194411293	74.93192253	0.321295503	22.96079031	5.908760118	18.51508456
CG42249	20.77890137	13.03522135	6.170863785	8.676305805	23.44025385	13.42276086	3.132305955	1.827300137	6.357976555	6.529625467	16.61143637	8.897879132	17.68446218	22.59407516	13.49018556	6.003110956	5.029489846	13.92444286	18.61985285	19.16420907	25.23348999	0.588571916	0.515244441	0.902933831	0.902032465	0.34581876	1.155325004	1.24324912	0.673557435	1.000215666	2.369560899	1.924495227	2.629704218	97.71577038	73.47208459	85.78105042	3.605014234	3.369185801	0.095047412	0.10137305	1.301620408	0.346016015	24.42983104	0.008554887	3.120080751	0.371454753	0.25142794	0.035087601	0.10426325
CG42255	0.075006922	0.028629568	0.135794758	0.346204957	0.160118427	0.097060947	0.082459855	0.03278536	0.081376351	0.044498297	0.102972914	0.240379528	0.136059896	0.031712042	0.064269559	0.242585681	0.027008435	0.100050597	0.405373943	0.208521943	0.046782226	0.015704719	0.025404598	0.040469166	0.027055606	0.002030051	0.016133607	0.026656561	0.037914007	0.030054807	1.477289296	1.655652603	2.059237892	0.457389383	0.246131037	0.131442483	0.537767122	0.133574643	0.210251866	0.20348476	0.678027638	0.430340657	0.397321503	0.021747202	0.792426815	0.038409579	0.038964607	0	0.830438955
CG42261	0.607757388	0.705774691	2.539288695	0.195671143	0.246076032	0.788304769	1.715088055	0.552952808	2.443372242	2.597620329	0.540064691	1.058947701	0.123750218	0.208096623	0.134829085	0.98587795	1.455081053	1.80723949	1.976251166	0.198331196	0.167741659	8.354536857	6.920522653	4.550981613	7.639277861	7.728010819	5.338924977	14.48202903	12.491789	10.19811117	0.740286291	0.717754116	0.576286818	0	0.016977079	0.010216472	3.190229539	0.86065902	0.01985376	0.016706484	1.397140374	9.501994674	0.020871731	0.045890139	1.23652684	0.003584052	21.70869183	4.88357085	0.516118946
CG42319	2.670201632	2.358807866	9.443477694	4.515749654	3.336994594	5.909010452	9.761937175	6.933310301	3.408084378	2.439820549	5.559169759	9.91889716	2.95478494	3.187532814	4.660629781	8.031505185	4.115610758	11.2800651	15.51294299	3.56459205	4.435959287	13.35416939	13.00915275	6.776501666	9.183908964	19.68966356	6.288412477	14.34393609	13.01062378	10.2499698	24.01220076	18.64717145	9.188030246	0.449397329	0.502419157	0.475754321	0.15178201	0.404877328	0.010395037	0.013387182	11.1271746	1.014202394	0.13351874	1.292430208	0.019994421	0.00640755	4.378996827	7.762933589	2.119473535
CG42324	2.263514284	3.593368994	9.51622855	4.168742677	3.596291893	5.641103171	4.807222574	8.671150416	3.841460681	2.280132223	3.776409934	3.816501991	7.860788742	4.166179938	7.537761863	7.656450614	3.297487624	7.210707047	8.097225177	3.177843558	2.651567907	17.79547041	15.01586865	15.59912016	16.64898409	19.45779354	15.49416027	23.80776716	21.95706245	18.71802382	9.862903196	8.196743043	10.41162303	3.156234701	4.115837423	3.455301876	0.463671656	1.482569851	1.666103046	1.187753618	4.42305035	25.32619223	4.695099166	37.69079144	2.764636918	0.28740814	54.99150006	10.5704722	19.3376943
CG42337	0.003164221	0.768517988	2.396860903	0.244048369	0.016681205	0.488925203	0.870204033	2.494519016	0.88811189	0.811329577	0.828743072	0.925745973	0.10516973	0.086062859	0.104242578	1.039723724	0.928611569	1.391223359	1.805241501	0.028092853	0.0841034	3.356865141	3.418590804	1.801236946	3.27776984	4.141994763	1.820607651	6.429344996	5.906631205	3.189534537	7.541073516	4.037441807	2.148064167	0.090424339	0.084406331	0.066494563	0.147541283	0.110042783	0.012933923	0.005623689	0.678302751	4.324492049	0.018213855	0.024589382	0.350898385	0	10.59749376	0.998152347	0.165037131
CG42369	1.832317693	3.849166069	26.41896166	3.243829458	8.453484568	14.54196898	21.65593265	10.84634025	16.29769014	12.42526671	17.98796165	37.82844348	13.22145662	6.384770543	18.15243635	71.76209617	19.32872796	56.75770987	32.20117026	6.957066417	15.20053091	73.8198031	158.5318478	166.2174843	57.67665675	207.0701833	259.8961691	120.2398412	161.3142183	230.6138412	70.11345654	116.119446	171.9217307	8.923476526	7.242941645	9.476745678	22.04485762	12.1925599	0.986398816	0.267029699	4.033851811	0.42615652	0.921506087	5.750107606	0.009989976	0.370063587	5.265384496	185.6151784	0.597404479
CG42390	17.38239779	13.35275282	46.20256845	7.507790836	7.881432605	24.21870204	37.91080787	31.68773064	15.91281103	11.7037698	18.8630788	31.3778426	13.37432868	11.58025502	19.17850611	38.64941234	17.17030376	38.9228137	50.74882728	8.23453818	10.83743279	28.0379168	31.14066148	22.80476195	22.81933113	34.8005399	22.41050998	36.71829019	38.52732533	48.26902941	61.33165477	68.41244153	57.74539485	5.926972788	11.88316519	6.905036129	4.214497069	5.131063263	0.77673381	1.238990343	39.73286422	7.656237616	5.109124536	0.241541155	3.002171503	0.319153404	10.88945808	17.13862939	1.237682719
CG42394	2.472896532	1.483630893	9.966448508	19.59383948	8.298044412	7.082636239	5.120972851	5.980035907	2.336856306	2.679607294	5.969567196	4.58514029	18.94681769	8.674073653	14.7572331	4.614210834	2.204959287	6.501328209	6.470525097	17.22942916	6.849505093	3.608474828	5.937303629	3.7387414	3.042475003	5.929142613	5.083281131	5.295298817	7.819603064	8.066454907	3.069881068	3.478059268	2.487509371	17.04467162	13.95625396	10.91815431	3.62886485	9.056851299	0.795340596	0.546711717	15.5701922	18.72413728	8.942773775	2.958707757	18.73476212	31.35416639	15.36420224	15.03919904	5.43578214
CG42397	0	0	28.08397928	1.692095547	1.012245284	1.14416892	2.121417326	4.314647208	6.494168561	1.188821365	7.787591348	9.333923088	1.757392967	0.736427787	0.7625627	7.711538828	4.947062983	30.71997243	39.84413485	2.146851342	0.865702411	0.362463689	0	0.214877024	0.842509326	0.007173719	0.053074896	0.018408062	0	0	1.801505288	2.23347462	7.032335755	343.0530292	208.4173253	262.4779292	5.95119097	8.1467542	0.026699853	0.032954217	0	0	0.307814249	0	0.103405011	0	0.243414523	0	0
CG42402	0.635184397	0.335221264	1.122268001	0.969650002	0.465626505	0.523159891	0.700441487	0.371447101	1.657515477	1.435374841	0.95383597	0.798691478	0.671574234	0.328998023	1.031715263	1.03218913	1.579302854	1.813163626	1.746779346	0.701531738	0.446946331	8.178700714	6.976281595	6.171967838	6.696402306	6.800516431	6.929205964	14.16579557	12.69910192	15.50232667	1.275718061	1.407494364	1.925235805	0.134044079	0.179882191	0.052536079	0.363604806	5.283219162	0.286382215	0.060705825	2.721105233	8.75831524	0.102445509	0.082813621	1.696226815	0.063686563	41.85657578	2.885090278	0.803117167
CG4250	4.284225626	4.268992869	27.47230381	24.11307692	14.94890627	9.946124746	11.146491	8.136600201	6.339416539	8.274848215	8.425200236	9.596534202	10.40660926	9.261637081	16.32767643	17.50633465	8.212305943	11.3593715	26.72842727	16.78338122	14.84476431	85.66504281	106.3425624	138.8316157	139.9175388	77.33614172	251.9631585	100.9599542	126.7969671	339.4566045	80.47137622	40.72153419	104.7850155	26.42398082	7.403206887	4.871544828	30.66763731	3.774957893	4.621209527	2.876581909	10.27305283	10.84991212	7.135103324	12.8833395	1.734122526	2.315308872	3.228024955	192.7244628	39.87904074
CG42524	0.046506036	0.140447132	0.358326546	0.326245634	0.682342507	0.476639122	1.570859105	0.316626326	0.286863663	0.061320411	0.238049207	0.637154535	0.616970589	0.389767666	0.209658754	0.160807312	0.008834239	0.429632263	0.35627471	0.194040975	0.295421793	0.433341899	1.053406658	0.511353095	0.42195693	0.436822409	0.706272591	0.495658591	1.498860164	1.334776695	0.29003169	0.332469708	0.458722323	0.062352918	0.220743179	0.134181654	0.089198307	0.325074451	0.0435462	0.034496821	0.281747067	0.601658502	0.696957018	1.725478414	0.260818898	0.36746137	0.591175835	0	0.740978549
CG42540	0.244116773	4.132319322	10.76647285	0.446393395	0.319213678	2.505352384	4.706331475	6.592306801	17.12934031	17.95536066	1.956937804	4.114572288	0.438419013	0.615766799	0.649666699	3.839939722	11.47549592	5.135604901	7.499996784	0.35278051	0.332930049	44.07972869	47.43313216	28.91493939	48.35568193	51.90338606	30.56892817	74.86264119	77.35047694	70.0323604	2.770649593	2.920709647	1.887896366	0.068517994	0.186843588	0.031897212	0.301039211	2.300656952	0.061341508	0.03487555	2.255907833	13.85842524	0.060023173	0.006786722	0.893574192	0.022387976	223.2029537	30.74243834	0.187987574
CG42613	0.726224659	2.811983791	24.57235441	0.868872708	0.817024264	3.290546039	6.972855871	16.20563252	7.755646789	7.309493295	2.927719397	4.369749173	1.157011599	1.134120437	1.20416309	7.394036966	8.64669635	12.46579626	12.20734129	1.035120661	0.672149547	91.22522758	67.82873829	40.54511406	99.22724332	93.4715613	41.94703367	144.5472215	124.2231195	105.5706078	12.10505425	11.96371464	9.708324246	0.460172568	0.758698961	0.396939064	0.823284925	26.62326976	0.03343958	0.113778598	3.991787579	29.70092537	0.319144033	0.133520447	1.474107056	0.051690116	153.6062734	15.93902734	0.934872536
CG42704	0.051217707	0	157.297574	0	0.136775819	22.62089695	49.638537	84.85830016	26.09855596	19.92653004	75.80471804	65.73098575	0	0.840405533	0.220863225	156.0037724	55.56193667	247.2749828	96.64986953	0	0	3.311234848	0	0.394974896	1.331093418	0.517309269	0	0.494031377	0.212553062	0.475597571	345.2928209	1158.648759	1036.476792	408.459804	245.7659966	282.2542336	0.118001083	0.174440803	17.05696881	0.051195644	3.145605145	0	0.037093216	0	0.549265061	0	1.159159387	0	0.219613713
CG42708	5.804009645	3.649828019	6.677565565	4.817693251	9.837903294	14.6805331	14.0623106	6.647976495	4.422114023	3.111864421	8.70681198	18.75076299	7.40263552	7.648938348	5.822308371	11.91754386	3.866288574	10.93566007	25.27693277	6.491842276	8.372444502	5.37401935	4.432569209	2.674135102	4.259644733	3.698706508	4.26637112	5.097696697	4.453069018	4.587463736	3.677122398	4.442385423	4.06796222	15.16497686	18.69816832	14.36448308	23.40367983	3.890167793	9.468596139	5.9819894	4.860527989	6.809788238	4.934731114	2.074504019	11.41282758	0.123429965	7.684963156	2.492758996	1.973306346
CG42795	0.438972706	0.463219387	15.57332058	0.363855572	0.35914779	3.181379162	7.960324026	10.93554977	3.534844252	2.174163661	1.745059636	4.274968981	0.278960219	0.205984166	0.244748367	5.164415442	3.209016722	6.708640429	7.75528485	0.104891145	0.133837928	47.95320881	37.04367787	19.4665531	48.98455071	44.45883139	18.47876069	84.05034829	65.70388879	40.61218949	6.843096443	6.682343124	4.216641304	0.354478841	0.552559362	0.304977053	5.285670821	4.153134781	0.021010972	0.055874362	1.713384139	9.101746338	0.16480064	0.078200156	8.978414851	0.016310918	26.60509292	4.663091321	2.555835619
CG42808	9.615882658	11.08218877	31.50032386	16.97203324	12.43023742	10.33770353	19.37557014	23.95721586	18.94309493	15.90272556	24.8754503	38.60074095	18.16312875	10.47634561	10.64823756	43.12748754	16.75849467	68.82116033	73.33591335	9.78947789	12.27148373	37.11111863	37.52656454	33.26333973	39.15718875	49.50335487	44.256279	45.99674415	54.97830582	90.46785719	118.3722645	169.8901797	125.7375472	6.922070223	4.053680293	5.227939836	1.910395376	2.100513304	0.219292364	0.029250379	44.01138817	2.384548453	1.259205562	0.264466717	0.692046261	2.265197554	1.833769327	0	0.878770897
CG42817	1.87163856	1.842673005	3.774596278	1.437263681	1.870688621	2.658659937	2.490663158	2.666761569	1.375995948	0.695007079	1.967161697	2.54143119	2.852358204	2.495435385	2.376059185	2.48674304	0.979681261	3.10777291	4.341581627	2.07712115	1.612451086	4.914842366	5.414553945	3.597259765	4.397497399	4.338992252	4.123150699	8.050982359	7.858772149	8.971403031	7.867294618	5.709506421	4.202585629	0.644911491	0.646413261	0.448134985	0.064724851	0.435280411	0.13431208	0.216139904	8.451113106	2.494031854	0.506820253	0.030472057	0.214542102	0	14.94177943	0.442056524	2.266437672
CG42818	0	0	4.026589298	0	0	0.345378052	0.198707047	1.01190678	0.252228671	0.18111156	0.156806227	0.127859217	0	0.004659658	0	0.300544702	0.415261697	1.126768595	0.464581197	0	0	0	0	0	0	0	0	0	0	0	0.029385661	0.104375516	0.081010461	0.266130984	0.167031315	0.018157677	0.454551494	31.13474408	0	0	0	0	0	0	0.011940924	0	0.05173706	0	0.046561919
CG42821	0	0	0.024970267	0.398703031	0.854829644	3.093705537	0.32984508	0.042657532	0.296419375	0	1.058679044	0.651987058	1.549290564	1.738174194	0.386324387	0.273449819	0.094828348	0.446268382	1.053216	3.42736014	3.443016492	1.797922155	2.115147398	4.658956983	2.112098405	2.684966985	3.096686722	1.407114168	6.280144667	10.04132336	8.017892205	8.925382411	14.01027922	4.990448261	1.397776517	1.747291723	0.04726515	0.977703907	0.553671814	0.314152127	0.575296178	0	0.015656227	0	0.126653535	0.353460257	0	0	0
CG42822	1.633840218	4.275015549	0	3.854642306	6.581688197	2.046050639	0.396526877	1.071194284	0.031217095	0.268496135	3.455427509	0.384932032	8.021454922	6.092003968	13.47416716	0.016995771	0.234332417	1.451685973	0.945706063	4.871114382	1.167663186	0.027057492	0.218745582	0.257958007	0.038474696	0.091248271	0.671307426	0.180083352	0.753016406	0.585282553	1.838948077	1.995121796	1.767258823	0.614022417	0.653585226	0.392528671	1.986093494	9.871163417	1.285357826	0.544053215	2.392504614	0.143883327	1.289879788	0.327096983	4.537989624	28.17930463	0	0	0.037229722
CG42825	3.265111238	12.42480039	25.81485761	16.79937079	17.13630271	11.64344457	8.638680544	7.444443004	15.17618107	15.50353469	8.94642207	8.234748168	31.56252008	19.38353026	25.1625485	12.8777469	13.87093967	19.40641022	36.05180051	58.81117264	41.59224988	0.62869167	0	0.05037817	0.447833654	0.00279114	0.082068293	0.024515326	0.201493709	0.029037896	2.025397616	1.407968653	7.579390765	181.0659725	208.2217639	296.216998	2.990283756	7.277792691	0.287298273	0.00545263	0.897735494	0.019236122	141.0231035	0.039456826	12.22765696	0.521280757	0.070991767	0	1.466232949
CG43055	0	0	1.736065828	0	0	0	0.169085056	0	0	0	0.050812208	0	0	0.141026137	0	0	0.42095273	0.496408009	0.524878879	0	0	0	0	0	0	0	0	0	0	0	0.150013716	0.148156098	0.648497312	2.948541777	5.544800465	21.17687866	0	0	0	0	0	0	0	0	0	0	0	0	0
CG43074	0.038260642	2.883035803	124.4183796	0	0.24716642	20.77176612	71.33388967	70.51122381	90.38870534	49.03453895	83.38754254	88.95920196	0.546050322	1.020966688	0.066869797	157.00952	48.1092375	134.1859323	154.8638404	0.196238274	0.205473678	5.438409812	0.393134477	0.383433355	6.066705726	0.319993331	1.154707578	0.701922683	0.990439967	1.209577043	318.8755373	459.6456165	239.6922837	256.5947353	162.1269422	84.22161958	0.033692415	0.138030363	5.348586318	2.2261279	1.555347242	0.119864394	0.166817445	0.253242525	0.07182627	0.083228084	0.203876777	0	0.214342126
CG43078	13.96490066	10.02744069	17.35764198	2.745949598	7.906756354	13.03809985	7.781456289	9.57395286	10.6892706	6.860595812	13.60816613	13.45640172	7.186931342	7.503269567	9.730378981	7.449579698	8.487380723	18.1637579	27.21465164	3.513936614	11.18374	33.09501912	26.52538835	18.24647045	31.77883507	26.34583235	20.03884581	44.63267481	34.67528309	31.84474173	73.82780054	48.48305775	33.25769945	7.889274481	9.490227898	8.654829281	0.613429016	5.063115122	0.38390366	0.27917431	15.16172543	3.949222875	1.790048585	0.100682173	0.87948487	0.041248024	7.212435407	2.081380962	0.160562604
CG43090	0	0	25.12249813	0	0	1.087523555	4.128761369	13.22288545	1.257111717	1.746002287	11.3522517	7.237311502	0.174491229	0.161182628	0	20.51615037	5.278969481	24.38940502	11.70421095	0	0	0.453044569	0.048083809	0	0.16817888	0	0.028671713	0.02001767	0	0	62.52253512	172.414252	112.228041	52.44616037	36.76278651	15.66214726	0	0	1.084080281	0	0.581450304	0	0.015332649	0	0	0	0.16332478	0	0
CG43114	8.607289973	5.13377964	10.36078969	10.68454609	23.75788128	13.15923261	2.255728763	1.990881629	1.889228355	1.376924481	13.43300296	5.85503168	15.5678617	28.11365451	10.50325572	7.386752942	3.22224268	9.584225301	9.05860587	15.08615738	33.93283604	10.23521799	27.47207796	17.66007371	19.65409376	16.32133724	17.50651189	17.11805431	27.06046141	45.76052359	12.38562468	17.04825729	12.1423267	3.298296981	2.690112345	1.443718131	7.442208064	87.53612788	0.031596365	0	1.29083001	0.351042578	10.23278024	20.2076098	0.16862608	0.688269665	0	0	3.797392921
CG43120	0	0	1.366584565	0	0	0.11444983	0.295423019	1.918794077	0.085338356	0	0.139622182	0.217058552	0	0	0.093626802	0.310818615	0.112775864	0.759660793	0.524237891	0	0	0	0	0	0	0	0	0	0	0	0.028092631	0.035079582	0.051126568	4.462461999	2.864548392	4.061026364	0.059018075	3.086820634	0.029094806	0	0	0	0.709003443	0	0.024518288	0	0.008251067	0	0
CG43145	0	0	3.157172126	0	0	0	0	0	0.0806156	0	0.873760812	0.616075555	0	0	0	0	1.021385828	4.448044035	1.377357043	0	0	0	0	0	0	0	0	0	0	0	0.119034278	0.616254547	0.181708111	0.914253173	0.493717489	0.14582857	4.7773033	123.0688743	0	0	0	0	0.04202643	0	0	0	0	0	0
CG43175	0.096510861	1.005944593	7.842577996	5.099830939	8.497461684	3.581132476	14.58739762	12.60582694	0.270922047	0.075949824	2.37594248	5.22079499	31.8882683	15.43354205	14.54482565	0.784803964	0.024512128	0.72007373	1.83142289	30.22332741	8.075609456	1.460944926	1.651851948	0.462417691	1.680226168	2.960072121	3.300927054	1.974188959	0.298175289	0.741837322	10.01105861	3.642074255	4.483015473	6.438389623	0.854141896	1.823723042	6.490486528	4.471119443	0.039759142	0.032783946	0.208511644	0	4.40464895	2.419808152	1.322339372	0.033318767	0.090766345	0.527051082	0.429910637
CG43202	0	0	12.25685079	0.014572204	9.301822811	1.078473447	1.330395904	7.476877237	1.164869666	0	3.606657766	2.234169597	8.88452455	5.658955456	9.155509111	2.846646213	0.316483018	1.306456954	3.23510608	11.71149388	0.959535132	4.16623618	10.78465899	28.57873354	5.463163029	10.31484223	28.51957054	3.196175978	17.16243555	31.50683605	19.80239009	12.83718097	45.45950172	2.77291502	1.608408059	1.480124161	0.011034766	0	0.205353192	0	0.064545004	0	0	0.439762919	0	0.493015325	0.058887016	8.206512896	0.061714097
CG43333	0.113728932	0.239276474	1.220838163	0.427837582	0.242589859	1.620718545	1.04196397	0.595844981	5.864060017	5.982147391	4.103800201	3.846610348	0.294604032	0.452939064	0.479331248	0.354700172	3.470181506	1.874167385	2.633150984	0.201213061	0.526449448	0.089881821	0	0.146738115	0.043615183	0.025891159	0.559933131	0.083503843	0.040740888	0	0.638352018	0.730430927	1.041636285	0.206681561	0.311154863	0.333089308	0.05610662	0.211510597	2.051503977	8.093600883	3.029481473	0.803206788	0.026746206	0.136130921	4.652747366	0	17.88134966	12.00049106	0.403817341
CG4335	1.157429413	1.973026195	0.436592328	7.307123501	9.622119408	3.67990737	1.331305148	1.23067331	0.460788469	0.057348346	3.110873888	1.478345562	10.64318853	8.584750123	13.15071121	0.447076668	0.915007042	1.548805835	2.075581928	12.51650009	6.052522219	3.804281071	8.719884252	9.827240215	5.898296293	4.900540799	11.71187658	4.198121682	6.232308138	5.709622342	3.833430271	4.90079669	4.165616952	0.683505231	0.354439254	0.061062275	0.013590353	0.106841601	0.037608524	0.033851093	0.09558215	0	0.111115367	8.2397323	0.06336293	0	0.060380259	34.86255105	0.263391735
CG43351	0	1.22804993	31.16221732	1.03545964	0.180194445	5.879104306	17.24486376	24.94337891	4.683846889	2.12569234	6.703718581	13.33320699	2.134608737	1.063354756	2.953942605	28.29865852	6.309803026	27.62702053	7.695781068	0.500907569	0.743535771	38.88405513	84.39579905	49.58996505	36.06150441	56.21506357	29.90361266	35.39749326	71.60966575	94.57614966	54.79573796	48.44073552	46.70877663	4.927664616	4.21098657	2.921010306	2.17797932	2.993340614	0.173566978	0.236724916	0.488643162	0	0.51107685	7.173103029	0.05878827	0.615148752	0.080391771	0	10.60434089
CG43400	0.106223615	0	0	1.115037552	0.394580919	0.568120921	0.307926783	1.205313778	0.599243755	0	0.122683168	0.074628647	0.821679231	0.390244675	1.516919164	0.38972341	0.196777553	0.37195691	0.091276014	0.490619646	0.322136962	0	0	0	0	0	0	0.040227202	0	0	0.055173503	0.054132389	0	0.914485169	0.565023474	1.737082244	1.34790191	0.363321299	0	0	0	0	7.022793394	0	1.624957828	0	0.033517975	0	0.335166619
CG4341	0.51806733	1.323658042	3.036164146	0.426348877	0.549176336	0.598075464	1.42841797	2.655607676	2.944964097	2.54895183	0.349177739	0.899147321	0.468238609	0.33121551	0.320819318	0.597853134	1.868460946	1.364635742	2.526452257	0.273793867	0.162100777	8.703522884	9.34497828	7.254530976	10.33004184	12.54164052	8.882223577	18.52092225	15.26980027	16.77839425	0.869072863	0.736912236	0.708111858	0	0.053054554	0.081518458	0.330395529	0.527734055	0.00859868	0.010759544	2.80958453	20.26455729	0.068215891	0	1.862961176	0	33.27669043	2.763421938	0.778600739
CG43448	0	0	1.772687832	0.336756378	0.273440158	0.44079743	0.434449947	3.735072282	0.584208296	1.066269186	0.63350416	0.246549431	0.673912504	0.060418302	0.293407606	2.519446949	1.868586349	1.590287472	0.31071799	0.127101642	0	12.61939928	10.63890922	9.116159671	8.68150567	13.43118187	9.717192711	14.50343082	12.05809976	13.82130778	5.157776161	3.961324781	3.559442725	0.171015114	0.051495894	0	0.065375902	0.355362218	0	0.033799437	0.838210603	7.09713712	0	0	0.098420563	0	11.98719635	44.68245204	0.040820051
CG4363	6.30036846	0.506364554	12.3547556	21.51094737	11.43365347	11.24601509	5.601758653	0.882353249	7.897532046	3.616011452	7.806311307	6.702994017	11.03948229	11.54901943	8.249587727	30.31555447	9.003590093	20.7445065	55.13701569	20.79712762	7.159277549	0.591100973	0	0	0	0	0.051513913	0.017809214	0	0.174811029	2.143687714	2.065577055	6.453373305	119.6607053	81.89772561	147.6937098	1.508616234	1.963408171	0.076822831	0	0.034007987	0	29.06415861	0	1.339576797	0.124839925	0.014838934	0	0
CG43673	0	1.391715131	7.599103588	0.001637638	0.013085479	0	0.371891164	0.058393422	4.05845011	3.712482226	9.387738035	8.41078658	0	0	0.185034302	5.272392069	3.165592258	19.8797226	7.666357224	0.042537389	0.029681226	0	0.684733516	0.979839232	0.394845781	0	0	0.021019992	0	0	12.99100861	14.88675389	10.68986302	110.0011022	64.82201435	36.25823381	0	0.206824014	0.255625083	0.214439684	0.358248677	0.093936394	0	0	0.334175185	0	0	0	0.024116587
CG4377	1.241057759	0.874639311	16.02740286	14.1255333	16.57017888	14.73108479	13.40691104	4.490780972	5.767062929	2.401418975	7.229930235	14.12784036	17.34592222	12.65108181	11.01439199	32.41817046	12.15397379	19.30820427	99.86941178	22.44459792	7.625450592	1.041910786	0.215432215	0.615937183	0.997853258	0.475538935	0.637162284	1.018893969	1.278061431	1.381384789	1.833421831	1.608728241	3.08881337	141.7020954	91.77344426	128.2404726	5.929937518	4.309029821	0.079453124	0.011878292	0	0	13.12268719	0	0.66855845	0.056822024	0	0	0
CG43773	2.477507711	3.339611918	3.292407506	3.287783733	11.70085254	15.31032254	23.02340161	2.795556396	2.460463882	1.309558496	4.513124129	29.77545923	6.715414736	7.174102023	4.350191722	1.003406795	2.435655942	1.421864584	1.838268359	6.310020849	9.470026444	0.010956781	0	0	0.097204738	0.014264022	0	0	0	0	0.052250511	0.13006515	0.238041193	11.85912022	8.71867161	10.31895725	0.028494657	0	0	0.027727525	0	0	13.08897024	0	1.644564735	0.033574445	0	0	0
CG43774	55.47483011	65.17359838	17.01504379	52.76274762	116.6029803	65.58795084	34.88872687	7.796258971	34.23338661	53.7509355	60.71634533	80.75945925	85.82854582	117.0940742	61.11520938	8.73801452	26.06410886	30.27357217	25.1052782	103.994523	115.1104767	0.20779857	0	0.125345625	0.143215447	0.041805896	0.13645752	0.013576992	0	0	0.575038505	1.100852836	2.197664454	248.3789189	125.3661256	158.0642215	3.607395933	1.402607333	0.174320676	0.152850995	0.178181798	0.072097661	155.5895725	0	18.71842908	1.543068889	0.045026292	0	0.971421711
CG43778	0.1830354	0.795425941	3.823220971	0.505726979	0.444096072	1.037825884	1.46404191	2.093832702	3.502641833	2.83500455	0.778907576	1.213371084	0.444606167	0.561353786	0.497051181	0.904131524	2.362922147	1.588656963	2.015710793	0.448040186	0.207958985	13.86520131	9.446655296	4.370982577	14.01809683	11.04409043	4.611451952	24.07603732	19.80278935	10.46944085	1.64578254	1.342211644	0.69162973	0.025039045	0.01896358	0.00400713	0.553900653	0.633424329	0.008833549	0.008016827	1.718021345	12.71530337	0	0.025328055	0.871407654	0	20.30737823	1.90742184	0.46794176
CG43841	0	0	4.482732138	0	0	0.802857156	0.658293113	4.348737246	0	0.095110508	0.416387341	0.838704889	0	0	0	3.276041752	0.806994268	5.33081538	2.568356	0	0	0.447017137	0.308173768	0.201045807	1.407690978	0.030397193	0.694004086	0.192377082	0.801722938	2.904199991	4.309462589	7.210169701	6.918773292	0	0	0	0.064170405	0.278943402	0	0	0	0	0	0	0	0	0	0	0
CG43897	36.10199218	42.01862516	181.5828476	41.9483952	43.40834497	55.20443606	60.601742	176.7856335	24.0483958	18.01398756	53.95527395	43.5380186	54.32702524	45.54920764	69.9615323	81.28947052	33.42376922	85.78834097	77.24719733	47.2808065	50.85113513	36.43700749	26.46939777	20.56116612	46.14603555	43.43702649	21.6168627	43.51622871	36.30324508	33.1417011	360.5020584	245.8561892	158.2713422	8.297284811	13.02534001	8.986600767	1.840729494	7.12062693	0.39004063	0.235674503	38.1240428	1.460737689	3.942230322	0.134183932	1.519396864	0.238073094	9.436671174	13.13176374	0.189362022
CG4393	0.442880819	0.58117974	5.326477883	0.625365601	0.473870594	1.179813886	2.374541557	4.926754261	2.230274939	2.151353635	1.091007117	1.503919836	0.818506647	0.523337963	1.098775404	1.5366813	2.464226237	2.701082744	2.833842108	0.560333796	0.578208045	4.02916187	3.885059966	5.017603995	4.462285795	5.732461018	5.215046408	6.683771746	6.428962777	9.04797371	3.553136401	4.005463634	7.112807917	2.021218718	3.550522395	3.213654097	0.587709996	5.254335151	0.325457015	0.413723154	1.972167235	8.999748736	1.714066974	0.206106237	1.386610551	0.093100888	42.92094026	9.961418201	1.241317548
CG4398	0	0.02131752	1.697648402	3.770831714	1.018620215	0.789793959	3.552930723	2.245229411	0.256261505	0.046892352	1.507416562	3.22699643	2.69407474	0.908232598	2.265980896	3.679955465	0.807496472	3.583883843	3.184370113	1.093829514	0.592764619	0.950279355	1.400054083	1.541739162	3.770330816	0.578099504	0.522343206	0.97840122	1.890195999	2.097471949	1.002212942	0.731597408	1.269535285	0.222941155	0.368136853	0.115999213	8.728936675	0.728328243	7.399112857	2.44972761	1.129639194	1.975618799	0.408604069	3.104203054	4.26322601	0.69156593	0.288980795	6.535887806	6.257736298
CG4409	0	1.71260741	0.219015976	3.318350932	1.132456915	1.078948098	0.178210071	1.986699832	3.234215898	4.530700557	0.643191358	0.472570948	1.978790425	1.168177972	1.809644878	0.110000633	0.775727888	2.392799664	2.419372259	2.409734594	1.28574161	9.347747089	8.687068314	10.86761898	12.09295771	6.912575946	10.26154862	19.14655072	19.19649665	21.2957247	0.228596259	0.428098186	0.481621941	0	0	0.017589045	1.465966259	0.606692573	0.038522527	0	7.491702406	38.88985345	0.203963082	0.485709695	1.729445873	0	41.10116401	12.32134711	1.756712771
CG44142	0.084282303	0	22.12506812	0.097311326	0	1.30633139	7.997156786	6.649175296	14.60072649	14.06947386	12.82835624	9.666510564	0	0	0	7.923582882	5.609863293	12.57970871	23.96390714	0	0	0	0.167342064	0.229255974	0.140871337	0.290264543	0.508823329	0.020021767	0.299055722	0	42.27321856	83.08356672	43.11358158	24.62357499	61.8232317	13.74395868	0	0	0.115586704	0	0.180057972	0	0.183118407	0	0	0	0.033199766	0	0
CG4461	0.030507684	0	43.35278659	0.206431432	0	18.99806072	47.74647738	25.08243333	15.44815345	11.75607361	36.63895535	82.24101925	0.027756724	0.60887454	0	64.06263215	17.63478589	82.60794647	110.0645238	0	0	28.18771521	21.66841762	11.04553942	20.63979019	26.92194686	17.16619704	28.82545933	19.76247847	11.99806069	138.213795	192.0015998	126.3660503	1.164125561	1.252571558	0.787268931	2.131372401	1.152251512	0.020919472	0.075122026	2.445882059	0	0.02209447	0	0.036757519	0	0.593843216	0	0
CG4462	2.185612271	4.339843121	6.067588627	10.21558431	5.311748049	5.666164352	1.757027896	0.857408788	2.019897471	1.16182849	4.353644382	2.685633585	6.403453854	6.77596333	5.578965593	2.324565894	1.149674851	6.106391637	6.226300703	8.165482174	4.486768354	8.391153584	6.042410169	4.936381707	11.33035746	7.033105307	5.419443127	16.02223503	12.89893117	11.23609474	11.52454539	7.138964854	4.938026139	28.78736007	20.82327316	18.28418574	12.58702918	3.2248813	0.393024093	0.244629553	6.110537849	7.381271165	12.78402135	0.061621351	4.319717063	1.386863001	2.538020939	1.721681303	0.219241697
CG4467	0.353028822	1.100351646	11.57947221	0.564961691	0.13268986	1.719953592	2.864240235	8.741756943	1.752352797	2.126841764	1.005728004	1.873376849	0.399471073	0.409801309	0.436773357	2.209108875	1.925882273	3.718020905	3.418084322	0.311909331	0.160599086	25.86378787	27.44388082	14.66577618	27.56531191	29.93129962	14.0189908	35.93614607	43.22848401	31.86998672	1.861339968	2.262084297	1.13774037	0.064633092	0.076522902	0.100075073	0.045757713	0.856421202	0.042855772	0.051242208	3.359452293	23.9189288	0.085391463	0.014075859	1.639724003	0.009286663	51.56452266	9.90844486	1.032939467
CG4562	1.713777872	1.075311565	7.782119225	1.771085035	5.895736089	5.376763012	12.21876414	5.919951249	2.662941042	1.76367937	4.832827776	9.647333173	5.53893941	2.42136766	2.920312611	3.05924932	2.053031421	7.32334714	7.869712615	5.5666603	4.714117548	1.791112183	1.626281467	1.056563074	1.731185682	1.623222819	1.651686483	2.573506817	2.973081855	2.705015726	0.984085195	0.79399614	0.956182982	57.59016726	59.15229382	38.45239404	8.582944216	2.636601702	2.804671044	2.083776098	0.667864944	1.743505377	3.921746787	0.178642759	8.213884624	0.075356464	5.266808347	1.337491515	1.947168451
CG4570	0.6153006	1.557897566	2.658409656	1.084883615	1.768547121	12.32178785	39.60934816	10.29284115	8.545274438	3.629423654	12.041475	42.56225898	1.463533755	1.120505314	0.750260371	26.33359982	7.291030739	13.98791181	26.67160996	1.025060518	1.624909684	0.613036972	0.249200214	0.25886135	0.682050638	0.230691488	0.29927393	0.14930729	0.340017639	1.003194878	0.745660712	3.093189344	1.14143219	0.920180596	2.612818107	1.735139963	1.078308202	0.107931096	69.13516523	57.08534589	2.134770146	11.67376571	0.089008552	0.379887388	1.898222039	0	0.53479596	0	0.317986039
CG4607	1.425928423	2.468884838	12.91570274	6.694679407	5.670150749	5.383914707	4.599055715	9.876173664	1.80325743	1.330921606	5.141041354	5.66552459	10.22377893	5.449744439	3.95589958	11.03950617	2.707838054	11.44719193	23.59913074	5.283886567	5.161930235	8.667527095	10.23276196	13.80573192	15.23491673	11.42973773	16.25930406	12.22938839	13.4052687	14.64372134	12.19640738	12.31599259	15.70531783	54.57616442	48.43127197	51.06775526	2.682948106	3.404354716	0.309501442	0.212972778	10.22900734	1.224232104	6.339188315	1.265085658	1.65786778	12.19326391	0.14048497	2.897278027	1.33022349
CG4730	0.772520438	0.921799376	3.171914838	1.59239274	1.389305228	3.898218784	9.764506341	9.440062153	3.649873058	2.066216252	3.256295557	7.755509813	1.67038605	0.718716898	0.672593661	7.668268211	3.685394666	5.247775126	3.854573217	0.911603638	0.581608369	0.351823027	0.807387199	0.835621355	0.576235897	0.371532902	0.559554213	0.661472521	1.095595993	1.516014623	0.694079273	0.988350603	0.947173336	0.432837602	1.370091677	0.863365591	10.28005701	1.483914483	13.84215398	13.21203042	3.244510003	5.035976129	1.411126362	0.045013613	7.351126846	0.52193025	0.985112881	0	1.952395608
CG4734	89.50481494	95.37774511	9.851174195	217.7070693	206.266425	142.4262513	0.154393046	6.324317825	35.78928477	35.40223679	129.5506011	3.919866782	198.2873287	288.5517371	356.9407289	3.74494489	23.44425436	9.838386464	6.97500626	285.9457685	233.4830932	0.128580182	0	0.27963247	0.324164942	0.009398523	0.542254756	0.024176695	0.084486077	0.759644399	0.920378394	0.558406533	3.484417191	203.6029113	100.4540198	158.7898868	1.69942188	0.929109424	0	0	1.302371984	1.623371362	330.0391813	0.13395774	131.6821186	5.852136758	0.030291991	2.240959255	0.307208967
CG4757	0.012704873	0.009436286	0.694374542	0.457497974	0.706075946	0.026336174	0.101698096	0.160117371	0.047780104	0.240782225	0.050824249	0.19028518	0.206745945	0.231871551	1.083313252	0	0	0	0.123527207	0.314143995	0.018742118	0.252422276	1.672329093	18.91618509	1.611402051	0.94816292	47.50555846	1.713342752	5.550953921	33.73699654	2.33447704	1.656001094	20.00710587	0.151641571	0.092613686	0.702344316	0.033162962	0.070712771	0.017310615	0.002271498	0.334208884	0	0.095213607	0.049472308	0.019423983	0	0.009944195	0	0
CG4797	1.214245071	1.217655511	2.917960645	5.526760444	4.860792474	2.741052791	7.840102123	1.116456819	2.216066719	2.717090496	2.592898046	6.153377337	6.353432956	4.224887792	7.366299815	5.518547178	3.411077917	4.411626085	8.067188908	2.921606572	5.761155756	6.585325123	10.64024136	12.02818935	5.379529247	8.511496717	16.74859194	11.77534593	13.05384889	14.84047918	7.457350242	7.386625277	10.38295549	2.149587022	2.739467713	2.547567993	1.242057427	0.908560194	0.529373048	0.340210578	7.043385014	0.370541361	12.08675521	3.054890831	3.369130457	0.091293817	4.402923602	0	4.162497303
CG4830	6.844430032	5.178862061	0.916798296	11.00787837	62.30145043	22.50157742	2.300709127	0.041973187	0.958064007	0.302953445	16.95012454	1.882592192	73.31002151	37.55755553	13.33743303	0.066246701	0.856529498	1.797307882	0.568469116	41.56208806	33.74010277	0.025107643	0.093127229	0.062066063	0.142052519	0.247536486	0.04840848	0.04317968	0.451116103	0.348862688	0.110693433	0.060325966	0.096839735	38.17408219	33.98929848	11.56231472	0.001998111	0.009973526	0.019532299	0.009008661	0.290373334	0.126588081	5.914671557	0.314389717	1.367121194	1.170820932	0.100546941	0	0.03064832
CG4835	18.77106503	39.65529857	45.76244627	27.13166659	26.3944213	39.20651391	0.760899669	8.071756858	12.52723794	13.23611059	27.45069764	1.046997204	54.48610447	37.26045532	62.26450848	3.602941311	12.06016248	6.936014882	6.952813753	64.52407994	25.96322148	0.094647739	0.098417529	0.355193334	0.366442354	0.017542547	0.034287711	0.045920685	0.282271137	0.047834419	1.737879284	1.693096368	4.515673016	49.15146399	77.25828247	57.29082418	0.880827934	1.665280291	0.034721556	0.106284211	0.340656426	0.337005837	108.0785975	0	13.92791312	3.530434279	0.271310401	0	0.235433472
CG4887	13.40515469	13.24065659	15.43879836	5.75612842	9.402181972	12.85733084	21.82612261	11.32471515	24.42830291	20.66374853	13.05788464	22.1911101	7.73029254	7.591601735	6.551159882	20.1234803	19.48614879	22.23086055	24.09611773	5.063413468	7.633450515	22.41889739	32.11108741	21.80217667	21.18459538	29.63197573	24.89565084	37.89359646	46.03403502	51.82086902	10.09574021	13.38272119	11.76977284	6.6409268	11.46635347	10.97603415	3.099276062	15.77654358	26.01763987	27.77414388	27.81415319	46.0993949	9.13183397	9.529059754	20.32806779	1.791959033	40.90959659	22.26462	11.09306224
CG4928	23.47937836	29.51248998	86.67060103	65.85939895	42.54760133	46.22192669	35.24447351	48.39956642	28.42617187	24.15886301	38.15385339	26.42650664	81.41212206	54.68857846	61.92913221	48.75191823	24.2991355	50.10883404	71.63842114	60.77976666	47.74660937	28.3788465	19.05252452	20.68041478	35.73958611	25.95054062	18.67557837	38.82097551	28.44994855	31.13411951	69.48058999	60.54190167	59.56059976	184.3360891	249.4447236	169.3251028	12.80553164	23.60647283	0.781652903	0.246558856	62.03053057	7.989260487	177.21796	0.986100847	38.83618827	153.1208842	4.843630296	4.586016756	21.9255568
CG5010	43.66354936	79.34396395	320.27312	136.7189337	153.1605367	290.0081762	711.5385597	649.0475398	88.47163756	46.83470136	233.0597713	379.5773776	200.7040244	156.3870702	166.4042552	502.1192334	92.00987301	288.5706922	470.0869591	198.4714047	256.2700887	285.0391308	199.581818	226.4032218	288.0680551	283.1939085	238.4548129	320.1952253	258.9053856	234.5686206	396.8611895	399.676343	551.2032665	197.8137155	183.431501	138.7053953	190.2314018	301.8198066	330.2108288	262.2234894	147.953383	87.92349434	162.2278167	105.8189147	196.9610083	60.23588666	105.9904413	154.4557684	158.7682408
CG5023	1274.735363	700.3907449	207.184252	534.9311346	776.2417974	518.347283	66.85895199	82.33636168	116.2045585	82.10184532	515.6466806	81.45997685	586.6882771	716.0343403	508.5200324	112.408638	156.6251136	175.363871	124.3712651	595.1473109	756.1953549	149.2264394	95.94629178	57.20972858	132.0728648	119.0641457	60.27959538	140.5157498	166.4831581	129.5337267	741.4673901	578.1404543	315.1700804	104.7553749	131.4918195	54.07015544	8.817313734	28.45374609	8.192670108	4.057862499	305.2011276	28.45651659	36.75655214	1.86604286	11.43005286	2.8711991	4.969453621	9.234753782	0.318473641
CG5059	22.20389767	31.60466989	46.45783531	133.3312899	27.38631606	20.22114014	29.21856826	41.29714205	47.6757622	54.29085169	17.93148622	21.94115712	61.33957972	24.40335813	74.38851374	41.98208078	34.09415214	33.07202285	31.38625633	41.97472234	20.32276014	36.65302379	48.82194296	61.69220819	23.16252306	41.22628259	60.19934329	32.95446703	44.23149809	68.66667045	29.20053338	27.49387037	56.41250996	35.62889506	28.28119508	38.55794946	11.36925575	37.86289914	10.12213078	10.04422372	166.5459622	58.44513422	601.3405762	78.00406403	35.69230376	29.82166484	24.98136531	65.14660223	185.3171528
CG5065	2.907561082	4.163290107	56.69390418	2.904607513	1.555256811	9.505129093	15.36453057	47.76667688	13.54036079	12.20635777	5.369686696	10.41950615	1.995808197	2.428704117	2.270872232	21.06146524	13.03420111	27.49459843	18.52823579	2.181180568	1.776450858	51.61889312	45.90779608	33.8364155	46.91072493	50.7560406	28.93200834	50.66479753	56.44154135	47.49069789	21.36843744	26.65664495	22.54997933	59.37296759	89.26419589	44.57758379	16.19054895	9.216709919	2.153671735	2.525168187	6.831362428	25.37680028	0.637193256	0.843793725	26.34243392	0.008104724	65.48362226	14.17893909	8.760903208
CG5070	8.901115765	8.323199315	0.22282814	2.49343095	7.789821326	7.908800221	0.098826856	2.149647935	0.268414659	0.19223849	4.29825184	1.303906241	6.973158687	11.15726662	4.316189185	0.285665113	1.259805775	0.787052754	0.574532551	5.942827513	13.17598697	0.009147415	0	0.035659989	0	0	0	0	0.039640466	0	0.054937947	0.027404828	0.278543036	0.701533885	0.790558119	3.784308903	0	0	0	0	0.029357322	0	0.652400159	0	1.189561584	0	0	0	0
CG5096	12.06096365	13.60799363	40.23515169	89.2401032	68.04484851	45.48502981	19.48674315	13.55912907	7.762055935	7.220289051	35.1715746	13.47970363	150.8025502	61.79417623	102.8526401	19.45283473	7.765265887	25.70208222	32.34234048	159.360332	65.42348713	1.306869077	0.417782837	0.93165404	0.575389451	0.443583476	0.558647703	0.709326158	1.194025575	1.289553933	1.974812526	1.929622294	4.655675854	246.5376774	185.794041	185.9544991	6.720916483	8.841100581	4.049025017	1.465324256	1.345969395	1.322668102	230.8568762	0.136409658	17.23718344	5.07466202	1.629105177	1.271711826	2.226973162
CG5098	2.671256481	2.0424403	9.401302545	1.885469377	1.069798262	11.35596678	22.46671238	13.8677605	8.725530675	5.543790224	7.685954465	22.27768234	1.678471324	1.82964502	2.277542035	21.21024763	9.673472672	18.51436128	17.3968015	1.411270495	1.747436914	8.005944432	6.683803476	7.441890916	8.315102038	8.748678719	7.972555817	14.11606967	11.87840799	12.57743307	3.168005684	4.300270295	4.742871234	1.24913612	3.068455923	2.194616472	10.78807934	8.801191325	33.51248739	33.83896615	10.34366346	22.16525471	2.130825711	1.872431784	24.37170719	0.605274082	14.42083787	4.320580636	6.347864895
CG5107	0.368880996	1.540524561	64.25176168	0.170362211	0.356828234	5.009883338	10.02472762	5.298041834	19.0063613	15.42356804	46.635727	37.83709584	0.054919309	0.965202323	0.33156896	79.12113942	31.13637314	218.5000612	166.5838201	0.09078578	0	0.296531905	0.094719852	0.739410447	0.63285685	0.209065868	0.324883244	0.458278314	0.065730735	0.318967493	21.20629288	19.08983829	23.17264378	1422.882256	1184.666886	912.3431764	14.57819883	8.349009394	1.31088429	0.032862931	0.031853561	0.185831647	0.039899527	0	0.109965272	0	0.58877421	0	0.158170541
CG5111	2.143363979	1.99034061	10.26965626	3.891363336	1.799137872	3.547460382	5.71815198	3.140788762	2.287877081	1.894097789	3.999039559	5.428161531	2.445190709	2.779000432	2.752159437	2.426112096	2.404906272	8.960494742	8.539316807	2.187463355	1.599163323	0.013191964	0.015122358	0	0	0.012218477	0.004508627	0.127853056	0.063535272	0.04100522	0.161650105	0.335788132	0.415738011	0.310878583	0.496707721	0.565063384	79.85896523	21.5382316	0.009190644	0.004769134	0.271797746	0.033707306	0.558488945	0.621235652	52.91396579	0.20675226	0.1143124	6.743373444	8.569899992
CG5246	31.06192952	26.76170122	8.951636215	38.218351	43.87932723	20.47697298	6.416072109	1.489361698	5.039078031	7.299576063	20.79884862	10.17472664	87.941852	35.02555702	29.92311379	2.009201448	4.711045421	5.54299984	10.18973447	32.2823393	51.49388915	0.879455786	0.089039674	0.106568096	0.172824553	0.004468874	0.04927461	0.505702982	0	0.054881969	0.553367608	0.600546868	1.054795534	52.84871042	31.73723182	29.43550443	2.234915543	1.186805458	0	0.008730166	0.401638715	0	32.32574645	0.910982069	7.542851121	0.813321654	0	0	0.540833771
CG5265	0.202127024	0.404462369	12.37237687	1.830140444	0.199993399	1.773889397	5.019702844	8.179734098	0.973373196	0.43299758	2.565025065	5.303003443	0.526451142	0.105509594	1.162372114	1.911261785	2.714603985	5.945101118	7.544485938	0.38817142	0.232079435	0	0	0	0	0.004359404	0	0	0	0.009195789	0.096762239	0.289332516	0.160542403	0.638402051	0.573859753	0.154949006	74.97010708	15.90666063	0	0	0.021400872	0	0.205376155	0.085233699	14.62989428	0.112287865	0.310269215	3.511673313	4.205899777
CG5273	28.24399181	29.81592626	42.40514733	28.99187686	41.70515926	41.35944296	48.5544621	19.59662094	28.92751673	18.8425822	39.74879555	46.2247715	29.56516758	30.46147223	33.18245999	53.40355086	30.95592675	63.21357808	66.16739344	26.30734392	31.13743	119.9135431	138.4185034	174.2903221	148.2620173	170.3655083	202.6028602	199.020998	255.3736756	279.1882723	70.5238183	88.1386446	93.30002685	19.80279429	21.97229645	22.454472	27.79373622	37.27910579	27.34208288	28.06749531	88.34322773	27.9766568	24.5221696	2.710730161	36.60713954	3.323544586	24.58625177	28.96951083	6.678365808
CG5326	1.910053261	2.174665679	30.37460401	1.798839724	3.364537183	9.448106373	4.777310957	11.02592155	12.13953953	8.871728424	13.10426452	12.40491734	4.992539412	5.056707078	3.505567224	7.595492893	10.0500518	34.7322179	25.00392522	2.042205829	3.291376484	23.80124952	19.2386262	16.81435797	28.96526667	20.87647138	19.38324609	45.8538047	29.64867902	37.17396438	25.22223326	38.56710445	21.27204115	9.125828954	13.31984602	7.312212558	1.648933654	28.22190902	10.14703735	12.52411555	2.644299079	0.152115359	0.277252679	0.02794073	3.757942651	0.079919374	0.978829446	1.084655824	0.279471718
CG5346	13.35622152	11.99549853	11.55011546	19.27939336	22.69227617	15.46817782	5.600595171	5.560816212	13.23369368	9.77934035	15.84790686	12.09884982	21.6806223	20.41430192	13.82587214	7.041258754	6.757708495	9.826473944	13.74853572	20.55727674	24.18264932	6.389515838	6.832406592	8.457161494	7.311102067	6.877245595	7.399802206	9.370851544	8.321644928	11.73614136	16.8058642	8.734644924	11.45912404	29.52052024	23.11806902	23.95160035	9.568597751	19.44718037	2.742391875	3.079096859	13.91488935	10.08460813	44.22936778	7.514904285	20.38777215	22.9587723	3.349513521	5.446540087	15.8881485
CG5380	3.853792249	2.090778125	4.719107308	4.005645178	3.325226777	5.824568931	13.07674771	1.720576569	6.076476368	2.820646157	6.817608071	8.384163691	2.79376116	2.133835791	3.797609574	9.852546284	3.369843799	8.327327121	8.341896453	3.866290287	2.105756104	1.669220327	3.00494895	1.80845038	3.678898839	3.716995544	2.125121165	3.311887206	2.881796444	6.27781313	1.473624475	3.957445964	2.589079924	1.767590486	1.615923924	1.182727219	11.18569554	2.470126023	12.75051232	15.04571275	5.195290961	6.50767502	2.786635487	2.185263985	8.717156385	1.03930388	4.002713185	0.606944382	3.564583556
CG5390	17.00358908	17.62342862	10.91551388	43.71884956	43.52541007	18.45599442	8.718588496	9.020327897	8.151889153	5.864984963	18.72581567	7.940837469	38.10870209	34.14415776	43.87529236	11.98043978	5.48068968	16.7499666	11.86962194	40.05534149	29.28395984	31.30910561	40.51971503	42.09407463	40.36065312	37.40322028	60.25328721	44.35531709	68.54774479	111.0376319	44.92585536	35.12216911	37.86451068	7.524815055	4.15657384	4.007669795	9.275181746	4.288715756	5.070023406	4.310162752	48.89908725	24.82152538	7.497471713	107.09804	40.731819	3.085579307	11.99247856	28.15454723	36.98678519
CG5404	0.372007807	1.180887859	0.585471063	2.289504827	1.246110465	1.723538975	0.52379069	0.124411322	0.74773724	0.170577231	1.284240385	0.481966025	1.331168096	1.785318341	1.121594217	0.622824949	0.272272761	0.680775199	0.736033275	2.959035615	1.17322028	2.365167446	2.16035189	1.330635343	2.640584736	1.708708815	1.628827386	5.398615823	5.320258005	4.081811256	0.381044187	0.512715527	0.371717752	2.90666648	2.547528392	1.460527244	0.119801331	0.06039902	0	0	1.517621711	0.055478293	3.942743771	0	0.43523697	0.442162426	0.045747272	0	0.050166389
CG5455	2.122249538	2.651580014	11.54991413	5.539365801	6.390913626	6.09197243	10.45115644	7.479009203	4.589412706	3.140035357	7.622128283	9.417392243	5.411008493	4.831903194	4.209711287	10.9464276	4.535503329	13.46422602	15.15820268	6.498886116	4.206560371	16.74276599	21.68655284	12.99282274	20.16775532	17.31586594	17.56292097	27.80030791	30.41253067	30.46385322	17.36509894	21.92835648	19.15526656	12.27248503	11.16423761	9.44552117	12.32045844	14.14215149	5.263311671	4.419302917	4.962626387	3.962342812	19.80977123	0.794723719	6.549750562	3.082895363	9.218101874	14.96396209	3.357239026
CG5493	2.04361	2.730017819	7.004597955	19.93320768	17.22451348	13.42995607	9.032759153	2.089238432	8.088667542	7.509769857	9.175988152	9.575994305	11.5722591	16.26331387	11.78410726	9.353279592	6.329677325	2.496397295	3.244628214	14.32588451	14.17722533	17.62909861	44.37854043	37.46686147	23.34522	23.17070473	42.96386865	30.45458208	46.06965282	46.8481537	15.87906232	11.9563915	18.38129004	0.902631648	0.313119094	0.317591854	0.686085796	0.412912568	0.051882668	0.03112469	1.89313464	0.54014478	3.419086129	72.95051624	0.151755768	1.648056438	1.894655246	19.79411442	187.2060229
CG5506	40.84999845	40.22439862	39.78354109	79.16009852	78.60732055	94.44574417	15.29566096	37.62085377	17.32640886	35.69960884	87.044434	29.77613362	216.0139	173.2462863	77.25947899	17.20759796	29.47239519	78.07749699	84.51372804	227.2013483	170.8941667	0.701940828	0.04212356	0.30322278	0.377008429	0.048108768	0.327182484	0.221342153	0.177986486	0.0557739	5.775578825	8.329415222	10.38726402	581.1267046	447.1137011	412.9982158	1.194181444	4.426818708	0.189775363	0.013284497	2.497171428	3.184995271	211.4035533	0.216504357	39.45706725	7.149445895	0.491291203	2.647820696	1.440949257
CG5549	0.329542593	0.135749835	0.165062509	0	0.192298335	0.341695462	0.465609562	0.013184666	0.437182261	0.352038384	0.16574444	0.729426442	0.031208635	0.021195826	0.037120208	0.278178437	0.078518154	0.431921214	1.161124333	0.061038124	0.224179499	3.479197482	2.928527797	2.347931611	5.091287793	2.995106971	2.895567823	7.805181411	4.844862206	4.668384805	0.563135319	0.422460697	0.25279701	0.530255501	0.264812233	0.033200167	0.032796749	0.039771499	0.009401433	0.004226341	0.141359166	0.49047259	0.045468261	0.008729434	0.034612696	0	0.758424309	0.026795121	0.008648403
CG5550	4.771764482	9.129289776	7.053437579	13.52976885	12.35217552	6.587473169	2.305624814	0.786065289	7.320531032	4.530938988	12.62140017	3.455026756	45.61287583	28.00171864	18.00258378	0.878483424	8.303652025	7.599275144	6.143066297	45.90590047	36.58128971	0.093214144	0	0.032012944	0.107840135	0.00799326	0	0	0	0	0.459119152	0.417363886	0.747621778	72.64445857	33.34230358	38.1819684	0.009435524	0.455574891	0	0.017896675	0.244910268	0.108388146	38.04155495	0	5.5255453	4.745308655	0.044542743	0	0.110640449
CG5597	70.48669456	34.50415451	51.64716625	52.63279991	56.04012413	56.04494481	49.82200576	27.13823891	24.25731568	14.49072275	55.20777528	71.95990733	52.84551706	56.78238711	74.55179442	64.44914401	19.71449812	76.23702134	109.9950777	66.80790572	73.53227141	70.89450355	64.54798816	46.16975026	86.45086176	83.7531923	54.97486564	109.4513898	65.76603391	71.64585936	110.2167868	102.2857477	135.5670147	16.8783263	20.78543101	20.20694968	5.310572541	8.480467533	2.604593853	1.446140493	47.53558294	2.256406957	6.667780485	0	2.665509306	0.724641787	2.502728697	0	0.342075446
CG5621	0	0.005254833	3.49494339	0	0	1.500569594	5.131555316	2.522840068	1.009475405	0.786109346	1.193023511	5.024417265	0.034147924	0.008919141	0.066310521	2.491597904	0.997546524	5.729989301	11.16301553	0.001473091	0	2.889755484	3.975359995	2.799397656	2.474033841	4.230772945	3.477177969	4.242932828	4.662856056	5.385120951	6.062951718	8.464798377	6.992493818	0.190057327	0.178751026	0.125536021	0.122626598	0.034391987	0.067510261	0.027465501	0.15533034	0.152653522	0	0.036494672	0.052845933	0	3.167658222	3.060341217	0.008648769
CG5639	1.52257388	0.973169388	0.88610199	1.297222015	2.729074252	2.716853385	1.447775937	0.850862681	1.557288088	1.281004298	1.926144508	2.140628411	2.742831445	2.401312806	3.606085444	1.338649968	1.391217293	1.992922734	3.797957939	2.350312642	3.459693635	1.14564862	1.374394336	1.051453544	1.268275115	1.617064924	1.354926873	1.811233728	1.952154147	1.869080166	2.40964691	2.402413801	2.756854795	1.63966839	3.159754916	4.289503841	1.795110997	1.385904363	0.117581118	0.028911584	6.719061168	1.127734381	0.392354817	0.206742833	3.340662379	0	6.788772279	19.49263971	1.911697964
CG5646	0.121634589	1.321863136	2.190124613	1.108380221	2.419583916	1.651547477	5.921036789	1.788713505	1.147359654	0.554542779	2.119513982	5.554018551	1.24225562	2.013764776	1.70822	2.923366468	1.392267341	4.511876502	13.64304827	1.148910343	1.78514786	0.94999672	3.012881113	6.785875221	2.057674406	3.00565882	10.28152538	1.33160501	5.540687367	8.452626795	2.835857291	3.530575284	6.977929884	3.035916719	1.6786316	2.242874828	1.711522466	1.928969764	0.879920212	0.512307084	0.762436611	0.843924115	0.263388417	0.172130679	0.054254407	0.105432116	0.479865702	0	0.095359703
CG5707	12.6085412	2.812307941	6.892550986	9.524151885	26.74598388	13.00876016	10.91381487	2.997273313	8.11068524	3.848371835	18.22825711	16.08833655	17.74757042	13.1510134	9.657746477	8.25299483	6.495027029	18.93064406	31.87799809	12.2911008	22.47420335	20.5316463	37.00353191	24.03357425	21.4449579	21.74341772	33.82780918	23.69500634	31.66535852	37.05713768	19.16604642	17.29967681	18.25116013	34.01750466	25.08128056	23.45556618	2.818962475	3.757760634	11.06536029	7.234049889	0.938547348	0.446544447	9.573569584	4.226454422	1.261986005	0.229679725	0.293785593	2.038411902	0.401647564
CG5724	1.659223645	1.29375535	1.079170202	7.891285271	11.83217221	23.3251417	2.620493654	1.06535462	0.339361522	1.216085158	16.53207725	3.095136126	111.8234137	22.16431575	109.9069754	11.23637252	1.105250204	3.85720338	9.683813777	46.66996807	75.38390159	0.038257668	0	0.01675282	0.019426167	0.005638028	0	0.024702501	0	0	0.540793464	0.090880642	0.056660002	21.53374666	9.462917677	6.287810941	0.520809194	0.173479627	0	0	0	0	4.428000547	0.338265165	1.32260618	0	0	0	0
CG5758	2.020942013	5.621664911	17.27280143	6.349835155	2.461096565	4.937174342	5.39253792	10.25552292	9.798749478	8.336449341	4.993998415	6.623008417	3.160834149	3.178340811	3.457527474	6.259080984	5.873446475	12.15452739	14.30539792	2.331349383	3.337500267	58.70865503	56.45409664	47.36713995	55.843776	57.05619215	51.61699744	81.22118456	93.0379249	102.8666711	12.79085596	14.88504947	12.24230924	1.517367231	2.052390976	2.15995191	1.640891952	4.372143475	0.724545502	0.621057141	19.41912852	48.7367374	1.400002171	0.592905577	20.73309029	0.10339127	134.2158208	36.52025055	7.259010231
CG5767	124.9797611	608.5378338	62.41113999	245.4027982	541.9657327	294.4877518	13.58927442	21.52664952	236.3359107	257.7627248	315.5189401	42.74145836	396.0895255	640.649105	452.8548121	33.5766977	151.0530516	81.30845573	7.887206406	491.4280094	726.0173664	1.13245242	0.017391247	0.167257503	2.332930489	0.032500735	0.375176739	0.021895825	0.401726612	0.190135144	4.586139706	4.99243273	10.46689524	794.9282239	704.4424494	827.5069769	8.000678799	14.13098385	0.626572435	1.345850239	6.13847244	1.717084078	939.9813398	1.69014148	198.148834	10.97711254	0.096982362	2.432971702	1.340467138
CG5773	39.45462979	33.06413743	7.603642646	181.3718544	144.6061584	49.20983328	3.274312478	2.126227454	6.906982045	3.359967379	40.96215774	11.21294897	136.1586111	136.7790886	54.02286714	4.663224972	3.727524613	11.70502099	19.29055355	94.9211596	85.44290906	45.52477319	57.67836699	126.4951249	23.86270651	49.3542386	162.5389953	46.80725113	36.60434366	59.75369221	30.07366443	25.27397557	49.5443331	9.345453484	5.599720014	13.25023875	1.336610018	19.04598581	0.069903699	0.078760218	4.890661118	0.494864426	11.15080857	170.0083249	3.371486227	3.715420836	0.262027641	0.797229848	15.79000302
CG5835	21.38263709	13.22058511	9.220486122	16.85949183	24.39197898	12.50249344	13.84990686	2.911987291	14.05661219	12.38668608	14.87554484	16.97021904	19.20179895	16.62769922	10.65917253	5.596167432	12.93373432	13.41928498	19.56870645	16.61916114	16.7415495	8.418521989	11.1753287	9.029503267	6.821257537	8.702565473	9.585335292	13.76650936	15.0451885	25.7832931	16.99544908	15.75521831	18.92869894	44.8579809	33.51736239	36.01330906	6.416435673	9.502817075	2.730332218	2.057179362	20.39294482	2.689916113	28.28861892	0.353018254	7.280006289	0.629500907	1.070380163	3.242440164	3.370530982
CG5849	0.210579666	2.639548357	2.247323661	2.585384185	1.805700593	2.1819094	1.980170958	0.299911906	0.678786076	0.231665225	1.697631407	2.222579707	2.850240242	1.249722643	2.659053627	1.867455749	0.630963931	3.452426278	1.046630595	2.561134728	1.431900329	1.435619877	3.615538568	6.706797849	1.504926771	2.954410216	6.394733962	1.964703106	2.37788395	5.338199715	2.537350446	3.37856702	5.484007926	5.422314835	5.04811417	4.334699186	0.030553414	0.527133364	0.076582382	0.077325259	0.647439861	0.021622188	2.240001727	2.201663109	0.218146762	0.132650383	0.120132053	0.928742188	4.983774081
CG5867	12.36878913	5.739260801	13.23551494	25.18673555	36.90505599	14.91440553	4.738075771	3.390564856	6.467568488	4.453262662	20.56790657	19.49891337	29.07551931	21.77187769	19.7343434	8.573417711	6.943318288	28.62274057	32.59527109	28.97659566	38.13741513	80.54325118	97.99177411	172.9543665	177.4306017	92.77137	159.5531528	163.5327872	112.6769581	231.4226741	56.26283336	61.90032168	63.46163488	35.93947977	22.45386524	21.0286092	10.54073651	7.16119047	1.539967126	1.389597667	6.714175553	0.792448209	12.44088734	0.622260558	0.772069092	0.840360564	2.091729807	7.365540883	1.005026179
CG5892	1.48550452	1.44127468	0.267998448	1.325816426	1.297782137	0.8852625	0.25545295	0.701203707	0.023608798	0.096389145	0.72990357	0.064025569	6.976803868	2.195856057	2.296135437	0	0.160159649	0.017588415	0.128624823	0.737037466	0.33548761	0.006408668	0.074321058	0.093525315	0.004796995	0.036073169	0.065415736	0.026042931	0.135455141	0.19448407	0.023063528	0.022462499	0.049198239	0.002501241	0.162075134	1.038488689	0.164982733	0	0.032056553	0.05090454	0.010283852	0.072320577	1.091944855	0	0.103619696	0	0.051923574	0	0.058431724
CG5895	0.233480939	0	3.570403615	0.774763326	0.744864972	0.717918292	1.093573144	0.479134537	1.253150662	0.249643146	1.131958279	0.937484048	1.317147918	0.839870175	0.803459306	1.431537916	0.341251538	2.712916396	4.768141677	0.795939344	0.731898845	8.113236328	20.4073095	15.86366339	12.4861961	16.11643827	23.60973523	20.76075471	36.96698335	55.45714129	3.174861412	2.991907777	3.591846968	0	0.028865106	0.081468815	0.719009283	0.30732636	0	0.011967715	0.546203779	2.785809735	0.10898463	0	0.226737114	0	2.068428363	0.026305514	0.014417621
CG5909	0	0	0.8207054	0.335233147	0.165272323	0.873279998	0.875228215	0.236615997	0.059789043	0.209818374	1.169551583	2.270540007	0.635081163	0.989214073	0.627157292	0.361088189	0	0.956314869	2.043278446	0.852502568	0.330037677	4.193468968	3.854836717	3.314241998	5.732581726	3.551829839	4.927422261	7.880335409	5.761491987	7.093251436	4.539739867	4.111606825	4.533688358	0.301314828	0.239199279	0.213989492	0.003759467	0	0.011812572	0.022120518	0.401835824	0.03288155	0.062543367	0	0.063504126	0	0.21705717	0	0
CG5953	2.830163308	3.210035301	15.63332862	2.367104096	1.435984257	10.21092736	26.07928481	28.08379397	13.56206642	8.574675636	10.89976515	25.52143271	6.076837005	3.712934443	6.938922089	22.17764394	9.355280255	9.765249785	20.12800626	1.951403782	2.112622783	2.842663305	2.596194942	3.213989385	2.112438242	2.473397906	4.131493625	3.268453446	3.539364388	5.305329857	3.71971158	3.255727946	6.553700471	3.806190836	4.383286731	6.754122395	0.684533815	3.1086143	16.93413802	15.4189429	6.507277627	3.991296367	11.32705414	7.582666315	1.44535691	3.990556269	2.931506404	2.498143028	11.0036237
CG5958	110.0549815	61.9703715	25.02089597	210.180213	220.1952742	132.7512487	13.07253566	9.565826913	66.02569968	54.61971926	112.4125724	31.96642779	65.00599834	177.1524997	73.20946708	25.23022731	40.18837282	28.06673054	203.9561907	231.9110656	304.4135696	51.70195849	124.5825295	67.92171256	79.65553028	36.22950305	55.83872197	38.2644944	73.89705532	66.37745357	90.41022065	90.87843946	69.35840765	136.7905652	115.2182858	88.69001409	28.10895373	12.13921765	30.94003679	19.73776512	23.39779737	5.499687355	121.8982891	512.0640665	13.07339734	22.05837496	3.358670684	255.6583627	1347.820324
CG5966	3.100228078	7.298581732	25.53357781	36.12314253	2.527513375	27.62594082	85.83869077	34.53995799	21.32528501	17.23620862	20.78129172	60.25953773	2.438612938	1.842096274	14.1818831	79.77872259	28.67307926	16.42887464	76.5754342	5.10863022	3.171152112	17.47367192	3.697432556	8.494781691	8.662066546	7.919007325	9.229161892	31.48140098	4.446745256	10.01637423	28.37420307	13.75487217	23.62109058	23.5331462	16.73785538	11.49505288	10.31492451	3.383432482	24.45498532	20.51959314	7.473115288	3.012796333	9.839434963	129.2925887	1.764775108	4.61332531	1.282291999	12.79182769	738.3552539
CG5987	3.578647501	7.483818903	22.47178739	2.730441746	3.62753299	8.147073125	12.32561065	10.15239282	10.04253087	6.994154749	9.353541612	19.02935004	2.344731447	2.024517112	1.933308329	11.39852884	9.706482871	24.56884689	30.59450206	2.352131383	2.773957443	0.696445497	0.592419558	0.381436755	0.716220646	0.888935042	0.652284766	1.76470731	0.984152415	1.163044737	0.815294642	1.292301198	1.707498716	1.752416049	1.941678788	1.378663753	300.4032595	49.15333488	0.340602276	0.505122244	2.131216178	1.392801265	0.713118271	1.866666481	71.37894516	0.138918841	1.905618333	35.25406825	18.33015444
CG5999	10.07286882	4.789174965	2.281046666	38.23696156	35.8710512	37.3620144	6.798752573	1.908855752	2.240254554	4.312390598	27.99245488	4.435909777	100.483378	30.88224839	202.5208627	1.423951591	2.820023683	6.22248402	13.92193613	95.06369483	111.3650129	11.74717755	3.981747309	4.947933218	9.748698216	6.962472384	5.386106533	10.63568064	2.458823454	1.340195602	12.0867574	7.966089458	5.133630822	30.42108855	13.63349447	3.554449895	0.047330203	0.192918993	0.081099544	0.025104735	0.786900502	0.118231707	89.07407207	8.822852294	2.490418187	0.39347533	0	0	5.170027061
CG6024	1.715942918	1.016805545	8.283836896	2.979385983	0.89149146	1.299547557	2.091104852	7.796043639	6.026169089	5.14461702	1.077491234	1.312692784	1.166287442	1.525542196	1.229196123	2.717055885	5.298712747	2.150440584	2.531414133	1.26811575	0.611631578	20.53877281	16.71055754	11.05829306	19.17804157	18.47912416	8.649125322	27.05943085	31.81542736	21.13803956	1.990737726	1.975760907	1.410438579	0.064917601	0.163235902	0.090938571	0.508001054	1.583775248	0.292414421	0.253832458	8.30774564	77.00158035	0.142393403	0.03205159	6.410387986	0.039875125	142.5615849	25.28155482	3.781005136
CG6048	7.864111108	17.47145716	6.805609005	6.197456466	2.837796522	6.089681113	0.695311401	2.741989849	7.993033568	7.889593192	3.775878686	1.179257323	6.980548159	8.0144626	2.066137327	1.087327159	7.858222078	5.729939744	6.378622677	3.50294255	5.530589307	0.178367985	0.025740184	0.025339974	0.085256875	0	0	0.010715842	0.055612474	0.017204036	0.547498748	0.607011107	0.666334439	29.80598597	32.92493557	30.12166646	0.514907751	1.538730121	0.015542723	0	0.32638607	0.114374503	62.94149866	0	1.33936402	0.328255239	0	0	0.869766659
CG6051	22.22498074	15.35939876	28.14098207	8.270325574	7.767179253	21.94998804	41.79266714	21.47140325	53.39880647	42.90916102	28.5683177	57.27862598	7.956605568	8.041595002	7.624382114	40.15501989	38.73044972	41.41174463	55.19888461	5.457933839	6.384928045	14.53036055	12.52454783	12.09383056	12.31003557	13.29539755	13.66650592	18.32839656	16.60747077	19.77540976	15.35706365	15.15049212	16.27146815	17.59632473	22.22706568	26.0133327	65.8135217	32.05224823	49.24708287	54.74821634	44.62018842	19.05525434	48.08126916	2.451276611	31.42255132	4.833061336	9.973554154	6.32823057	10.76986532
CG6074	20.65914131	20.59428715	11.46349528	18.29904227	30.38672229	23.75659738	2.976766849	8.155739722	6.175261469	1.696340807	21.94089311	6.950882497	27.47454558	40.97594683	18.52239776	3.892750739	3.955990337	16.21618722	14.96301225	28.53691844	44.07749566	35.39682125	19.44206748	16.21143707	29.31523444	24.26122922	21.27360266	29.91092864	29.45889969	23.5210495	36.29480053	25.03720325	20.13790253	22.79547243	17.83185047	18.16422989	3.767993815	1.737829027	0.855049033	0.571111281	3.154438561	0.526949833	8.745947587	2.239121692	6.576334415	0.395408589	0.08320264	0.748317751	0.063137748
CG6231	1.271966576	3.277861075	9.179700072	6.932888184	3.597711485	4.713879797	4.497099096	10.06506229	3.550118988	2.038447944	3.513598858	3.369742876	8.984718738	4.580491172	6.908945171	4.703725015	3.349078476	3.511191215	6.326725587	5.189375804	3.239642818	10.40019416	6.422569158	3.46094707	12.68607949	7.111714924	4.063062998	12.90199637	8.848577596	6.884318198	10.14205838	7.163839925	5.265537144	5.282237637	8.668658799	4.281375996	5.954393775	3.090076425	2.030743989	2.588832935	13.55667932	5.245584356	13.34441078	0.525357031	1.480933448	0.270224438	4.494085612	1.939259245	2.619212843
CG6295	220.630937	223.5747783	171.0724755	198.1615519	564.4574385	292.8531341	4.336868752	19.33602784	284.9980184	276.3502658	398.4003078	119.2140591	373.0166731	539.8776161	452.5546661	46.62970415	217.9809655	315.259198	315.2302423	365.5015841	369.2799223	0.340300409	0.013648337	18.71456418	8.874026611	0.035165248	1.274544771	0.328024341	0.058322114	0.117318112	151.9200837	97.90662844	125.5341984	5002.228054	4443.622572	4363.865353	13.5193376	12.24416825	0.106601625	0.360274064	5.552784707	0.709708854	944.9105248	2.000265393	90.30813454	11.19931669	0.271513039	6.202107799	1.460362004
CG6296	259.2474508	277.1926711	22.52741553	329.6554516	383.1572641	389.7259458	0.147283992	11.82513458	26.91572357	41.08368013	281.9921818	1.900227581	674.7694072	463.5405807	527.3645463	0.222575621	40.4123873	3.787514816	3.369163618	643.5241716	301.4912432	0	0	0.040971338	0.051770573	0.004527151	0	0.023349308	0.093998398	0	0.853119928	0.687779793	2.924042346	85.06015495	98.18983059	64.13249869	0.001732252	0.660446367	0.020891888	0.154770238	2.46863532	0.271409886	692.3775763	0.223535713	117.8558584	16.90613625	0.077693797	3.587503716	0.549099735
CG6329	0.630809506	1.067923604	27.80087712	2.419272426	1.244252446	3.757445716	9.937257984	26.30426216	5.511130522	4.767164901	3.54626627	5.437646144	1.724633784	1.477550248	1.624199243	8.020822873	5.127985609	14.39104805	10.02953978	1.818995685	1.309666228	133.5779321	73.0479715	26.02676475	150.1826526	98.24466566	23.53904927	200.5109487	135.5799275	65.85799448	21.79520315	15.31207673	7.105711388	0.461815161	0.622854774	0.264143813	0.526241184	2.701921983	0.210976048	0.221175469	6.838588464	57.09298893	0.353682489	0.228408629	3.931644233	0.066281831	164.8511309	20.47321077	2.440193944
CG6357	12.66460957	10.95623966	109.8943527	37.46500889	9.194393551	21.06909266	94.29186682	97.58748873	18.12244128	17.4096164	16.75608923	24.29218942	22.20560065	13.03884502	14.00544252	47.01221456	22.2585787	60.59974102	38.95060991	29.74927066	5.698434069	93.33652644	78.00027834	63.10251845	120.718581	103.8920492	67.11978414	130.7427693	109.1187316	118.8079773	102.6579442	102.3982573	130.9982619	128.68032	70.64569192	47.94639314	40.37575415	94.89183931	19.09110441	19.42255939	33.23605455	93.70744626	73.52164405	21.76364129	37.79822514	7.820496434	23.0037085	92.21234868	132.510224
CG6415	14.69466103	9.424189929	3.43499549	33.77730774	66.22270494	34.85428242	2.556676653	1.912938393	0.933548007	0.834117832	24.80407805	5.53573011	47.71376199	48.53400947	30.89398384	4.559781325	1.448023806	2.739835591	5.434362473	53.35161449	56.88106485	17.90288498	35.99756742	36.28083102	31.28878935	21.82585937	49.38530083	16.3234644	28.04461696	29.41372911	21.90960561	24.15489584	27.99577411	2.363663609	1.663159596	1.507532626	3.714898623	1.167300794	0.18908869	0.08257756	0.928961751	0.105991836	0.953082091	73.22537938	0.207796936	0.901446591	0.065656705	2.774841867	1.467548472
CG6421	0	0	15.49779167	0	0	0.265022947	1.639001278	4.194657308	1.334834432	2.219450322	0.914019458	2.091689896	0	0	0	2.07052223	1.544150561	9.932406879	7.818383821	0	0	10.13726037	16.56829289	10.11541772	7.880300251	11.99030143	13.83133505	14.20707831	27.67153216	44.16196139	12.07206744	14.3601137	14.84142297	0.559727646	0.439777607	0.341598676	0.000363942	0	0.015614213	0.023806127	0.19065666	0	0	0	0	0	0.05245563	0.071203568	0
CG6426	59.00805654	34.51451751	11.9045047	56.46895275	55.99328788	30.41301469	7.747183301	5.450114707	13.58371098	6.163538464	37.55265851	18.29026008	31.26579306	54.75626213	49.57974138	9.804014594	9.212973952	27.53747585	42.47162884	79.17254603	68.1562773	16.61518586	28.59887187	49.45975579	32.34297088	33.0208401	77.49320445	38.0677234	40.63907876	61.26870583	53.07005355	48.73669452	69.75139785	8.331336649	6.435614354	6.394550311	3.166247744	4.48928416	0.306294175	0.035051966	30.5858128	1.536332674	3.844785257	12.46523065	2.774870232	0.736382706	1.728432041	14.42903656	0.879372037
CG6429	0	0	7.638136681	0.348171806	0.140490718	1.42051214	2.477312075	3.193690421	1.079911898	0.257181023	2.345859039	3.924381486	0.41033937	0.971053476	0.126615501	1.531103212	0.685711106	4.543860303	8.79823581	0.097955258	0	7.511931155	13.12944588	10.77050522	20.66182664	13.37873281	14.16545922	18.42520599	20.06813144	32.80626133	14.43085714	14.46644145	11.54942629	0.683802155	0.737871408	1.586436451	1.131112692	0	0.134927879	0.028261537	0.860195063	0.05009941	0.171453086	0.154646769	0	0.034009823	0.031084818	0	0.401207528
CG6435	0	0	1.543265224	0	0	0.519146402	0.31219082	0	0.027672659	0	0.437425654	1.120441934	0	0	0	0.709507732	0.050771143	2.033235335	2.616746115	0	0	0.935148623	3.259773568	4.819938136	2.386576877	3.688153686	5.732945346	2.689457916	4.910251507	12.88806732	2.663669024	3.106330181	3.568749589	0.241348948	0.154703872	0	0.010848613	0	0	0	0	0	0	0	0.096561553	0	0	0	0
CG6484	1.824003678	1.465741248	31.29242736	2.552904787	10.19393335	11.41632317	10.66722425	9.371791221	9.037992214	1.498069451	13.5812214	23.42913655	24.13647622	12.31371301	6.782883267	69.97372061	14.86624077	38.94735634	247.3490837	8.841774867	9.242713773	2.942907452	1.643822555	4.743618989	1.634580562	2.533912126	5.868821769	0.672147097	1.138286418	4.605732449	9.605555172	10.63023271	25.79419522	335.740164	200.8053318	383.7639673	8.959772688	34.26133324	0.218341471	0.130073433	0.228808668	0.083330793	2.967754994	0.021505268	0.19303411	0.071382009	0.109217653	0.02640429	0.741401355
CG6495	0.52282582	1.498886531	2.306436939	0.176413978	0.319208858	0.869653422	1.207216884	0.784700564	3.237820156	4.308299311	1.234793883	2.591943822	0.187077658	0.279795445	0.278690787	1.460959876	2.761712002	2.391311966	3.952694513	0.456339391	0.250242213	8.629699756	9.985872196	17.10785726	10.71284214	10.50137515	16.18915166	18.13909479	18.86584382	19.1174651	2.175733993	3.456020384	7.414504885	1.11948761	1.08484924	1.984278391	0.335764921	0.716616711	0.97362221	0.37741133	2.844901522	18.47737758	0.221864187	0	1.312860509	0.008439431	18.13821857	7.516493254	0.528265475
CG6508	0	0	0	0	0	0	0	0	0.161384575	0.040181153	0.797441569	0.355952192	0	0	0	0	0.753496533	0	0	0	0	0	0	0	0	0	0	0	0	0	0.01383154	0.316047817	0	0	0.178703983	0	0	0	0.431924913	1.073086065	0	0	0	0	0	0	0	0	0
CG6660	1.649551313	2.908439575	4.185059383	8.640999369	6.436373626	2.622017679	1.057313898	0.845638621	0.818451209	1.728369535	4.627118724	4.997263859	3.357925411	3.236297332	3.45279672	3.241014249	0.531697072	9.168547581	11.36525153	4.573618502	4.729920786	0.087797171	0.10852311	0.493284858	0.060024824	0	0.44391306	0.018235512	0.200469949	0.369685139	15.9797896	26.36080839	23.70128804	0.529546143	1.040526624	0.875897758	0.108517614	0.371917401	0.0496518	0	12.68325075	0.242478022	0	0.062525648	0	0	0.140777762	0	0.061562874
CG6675	0.053757917	0.119782802	0.636613889	1.559901139	1.591075261	0.629183769	0.90249792	0	0.135581136	0.257632096	0.559750453	1.174412884	0.51516185	0.214974018	0.822492717	0.749031914	0	1.553594832	2.500235144	0.386395277	0.737128894	0.931956406	1.325891192	1.991666487	3.558994994	0.361023184	3.252072933	2.804166796	3.826110348	4.469140391	3.996852751	2.498055881	3.409684754	0.278099178	0.251333418	0.153977592	38.11035152	1.895617545	0.012207687	0.003203784	0.080858911	0.033907522	0.051238563	0	9.75380448	0.214739463	0.097359311	0	1.550148796
CG6785	0.457290041	1.038252665	2.128915572	0.246926728	0.193070563	0.821243224	2.501545401	2.873929475	2.022082932	1.212754242	6.463867621	7.373013806	0.379904141	0.067386019	0.333852125	1.332896442	1.515653145	1.289263893	2.073206126	0.313904527	0.129675983	0.593674498	0.407164087	0.31082726	0.275816389	0.435369962	0.432969078	0.44065968	0.72354756	0.703495165	0.472159399	0.458426349	0.59436227	0.149845305	0.380863101	0.285709531	5.63602706	2.397568037	0.834150113	0.98761081	0.652081375	0.517393835	0.199134345	2.4868131	2.402259966	3.62308839	1.513352561	3.586896284	0.748582606
CG6839	6.010910978	7.466916491	6.760955268	39.88592376	23.34589758	16.28273301	0.129034482	3.134668945	5.501679855	4.331326592	14.97340745	2.573464644	37.87301023	30.06105467	45.46265218	2.623007549	3.321301893	7.779191034	9.122338978	127.166605	62.36869404	0.006887358	0.199947126	1.023643152	0.098646106	0	0.006640098	0	0	0	4.778113042	6.442868393	7.846911678	71.05851541	57.70578327	53.29197619	0.059852948	0.452055883	0	0	0.247542736	0.024740435	70.4928673	0	0.564319461	3.079391747	0.015450848	0	0.033637446
CG6910	27.12498738	20.99403352	101.547785	96.27244358	95.76179506	80.00070536	90.85252922	85.21295104	5.091951588	4.633347086	39.50573556	83.16891262	88.64383657	53.39621315	247.5856541	175.5968996	14.38328186	46.80406069	27.01744662	71.39911835	51.62738662	61.49450785	158.8513214	430.4763496	60.16493422	196.286478	550.0101498	113.7616893	235.7985937	429.3892553	117.7019697	218.2383053	545.7600985	19.45584903	18.96085396	28.69806556	23.34134148	25.55689241	2.942680486	0.532936287	6.60275619	1.046757741	4.543145169	351.6571268	1.026549808	2.281773649	0.604911088	2.29368814	4.651410387
CG6933	334.9755711	323.6400917	47.67773264	541.5341007	512.285433	403.0960702	0.170358014	22.64809189	116.9932731	140.8668757	309.776667	1.754884069	687.351088	740.96621	732.1420515	0.444694877	91.66235991	3.268815523	2.239981739	757.4998742	649.3545379	0	0.162746544	0.322015991	0	0.005206466	0.050770897	0	0.4393322	0.139871919	0.299622738	0.039098631	2.307782186	1.391921309	1.199105728	3.710998604	0.047698222	0.491760562	0.088797298	0	25.05472762	22.21710446	1522.258415	0.144340618	197.1051941	35.61449452	0.209539975	1.174338592	1.519713188
CG6959	4.224192662	2.575220368	6.812345612	10.18102834	6.831495561	5.04866237	3.288039359	2.871491279	5.164066134	3.051770478	5.688281658	3.185230557	7.703390884	6.131079657	5.462483629	3.146163094	4.246343835	6.567008092	7.071291496	5.944660671	3.342578628	12.02603782	11.54838718	8.560360294	17.25189247	10.70064996	8.726893019	17.61598865	15.63332979	15.05529469	12.66879014	12.65716189	10.44321428	3.013671571	3.089405654	2.017846172	3.818720751	11.10711673	1.637786808	1.477297987	27.13118729	15.05798182	2.674523582	0.184691165	35.04855495	0.427486338	31.3481127	3.030652917	4.366134115
CG6972	2.434659897	3.113277659	7.137791779	7.418650261	10.2448289	9.288963628	5.67346839	3.65492439	2.261792699	1.807206305	6.60936974	5.55545104	14.39059217	10.30174587	10.0028877	12.38568223	2.604037207	7.361156206	7.918926527	12.78189532	10.32016271	4.6638424	4.276783147	3.585238657	6.741957219	6.070408248	5.175328798	6.003486236	3.778427361	4.501856702	17.62480113	12.66673017	14.72049852	2.71438721	1.555977915	0.907753679	1.100961288	0.71724754	0.207967155	0.033078122	17.51076587	0.322548432	0.647596887	0	1.031078012	0.012434041	7.972768242	2.849068558	0.262276515
CG7025	1.885246187	3.283391063	0.550554708	6.60365342	8.456796489	5.035352682	0.015228038	0	0.502483065	0.252615717	3.895694054	0.53019123	13.01126242	7.269320926	7.109349628	0.405530939	0.628821036	1.284060433	1.07445436	15.45060458	6.722241359	0.003410582	0	0	0.193876115	0.00356083	0	0	0	0.014576778	0.260191359	0.146377064	0.023893694	39.10563882	27.45440481	15.08385572	0.503003638	1.143486556	0	0	0.052344659	0	3.9286451	0	0.287858329	0	0	0	0.082873099
CG7059	1.101177602	1.537987464	17.30386766	1.909477757	1.398895931	5.702881869	8.130619154	20.42449786	6.87713586	5.239827036	1.574061835	5.838171161	1.07888289	0.822575796	1.984092927	7.756780938	7.636082037	12.12903831	13.69413662	0.949936498	0.327065702	2.157641517	1.637048783	2.159627102	2.310248084	2.768469815	1.397287349	3.192283162	2.273664587	3.907847194	0.496801473	1.315521566	3.111594285	2.036103604	1.521338073	1.336077363	53.71082492	26.17226739	0.022097762	0.040033155	1.053607956	7.635181767	0.376649996	0.104240632	15.65849707	7.137077259	8.609363571	5.301831909	7.186526921
CG7130	10.16147573	8.72021267	6.139089303	8.272162706	4.031995519	14.28358836	49.14111709	8.348207667	11.40153724	7.544031689	44.50950018	51.91289434	6.001232078	10.45105279	2.374011801	20.95385544	10.88917597	13.65609942	83.26795158	8.000491711	16.55000749	1.396730767	6.57204752	2.38663932	3.051612325	3.080418047	2.383987208	5.77312566	4.300663513	6.02363573	5.220014911	7.772187979	6.617941151	3.279631463	6.493911179	5.654098692	7.871976373	19.6491352	22.09716718	22.95076057	4.36757169	3.117334148	7.807335617	18.06851917	8.674946797	0.362258941	2.079447599	10.58202374	3.938570707
CG7166	0.04990496	0.338519027	3.262555822	1.682319537	0.767895091	0.894397643	1.260192347	3.953028353	1.007764178	0.572504235	0.688855455	0.842002799	0.791154837	0.532496681	1.042669218	1.574342647	0.812752297	2.969203733	1.616827762	1.435982397	0.496050414	7.46786719	7.20478021	5.704393681	9.215609809	9.906425785	6.317502342	15.6699386	13.53995379	13.57778662	0.794500136	0.820325718	0.515698678	0.089230967	0.032103079	0.043062759	0.826462604	0.834072073	0	0.008878314	1.490799418	15.16326458	0.04744959	0.064145092	2.368749145	0.007166993	40.28627763	1.710764293	1.030317132
CG7179	0	0.124219202	0	0.408085985	0.021129954	0.043812373	0.029715893	0.069955311	0.262945233	0.081821764	0	0.008338446	0.121929578	0.173485214	0.181690514	0	0.311282818	0.012107711	0.146174244	0.088172233	0.029916198	0	0	0	0	0	0.008245515	0.009044619	0	0	0.008062234	0.079754745	0.051354405	0.485184409	0.13607811	0.10317913	0.040232528	0	0	0	0.187805635	0.060280039	2.618078446	0	0.327538175	0.108084576	0	0	0
CG7214	119.1679502	157.4059231	42.29133211	40.71536817	153.2415349	172.7997266	2.191148579	16.59789247	180.5967689	57.64709959	155.9300444	14.66133133	251.338294	285.4054294	196.5633469	2.963455966	93.99210692	14.88325012	14.48933624	171.8094701	256.75407	2516.188588	33.62795938	7.914596273	3802.250307	48.73004277	2.720473081	2623.482381	29.20073228	2.163636698	2297.116096	135.8603074	6.496913678	39.96210297	3.114669069	0.077997763	1.587285549	6.286580262	0.662887604	1.47269096	42.47972527	0.284555805	6.271132976	5.277245523	0.853267742	0.994475542	440.2933717	803.7209271	1.046133709
CG7298	199.4152236	196.4261111	27.99831533	282.190214	253.7579008	280.5488413	2.082333888	8.665664008	78.39480086	100.8443384	201.8399549	4.11212933	427.2337886	494.1615699	412.3137223	1.38814098	52.61563605	7.476675131	6.312316868	479.7009311	625.7536607	0.003512543	0	0.065058037	0.024991353	0	0	0	0.205936868	0	1.581303226	0.709252031	5.349045095	29.01191905	19.1716071	69.15786066	1.797385795	0.75515436	0.013560621	0.014257502	8.956347144	6.423956063	1029.314624	1.400588528	119.0414519	14.94475373	0.387768216	0	2.88866791
CG7352	0.188459474	0.987531131	5.38508349	2.729799804	2.110089116	2.263449589	3.997216791	1.548564099	2.191541968	1.602909407	2.11206787	2.884669125	1.561931199	1.838883823	1.292245775	3.204601694	1.549795293	4.099111731	4.707614047	1.019345636	1.351671755	0.654449131	0.522144897	0.107473702	0.293678771	0.337954636	0.135979837	1.020582337	0.829894134	0.641595183	0.28336259	0.506509698	0.466729539	0.228456741	0.431110934	0.11953048	33.57769251	6.226363359	3.101794251	2.82732712	2.543971467	5.115420611	0.153272064	0.243417675	12.34553559	0.055637847	0.638694494	0	3.356625549
CG7378	25.65437993	21.23594918	93.69107093	21.35770666	26.81594818	30.31416626	24.776853	57.49111294	16.77598331	15.9065145	35.37393849	32.80187964	24.80295632	26.31391779	19.6534728	42.91212771	19.21174817	62.2571544	71.95226843	26.77656294	26.87645651	52.81279796	48.09334687	35.77589679	56.94765454	55.41078046	38.36307425	79.74949449	71.26066689	68.62000088	189.1361228	150.9164064	101.5650625	8.473414999	10.03648186	5.821644069	2.007898017	10.9606424	2.283733134	1.382796177	25.933948	12.51639317	1.4992757	0	1.185902369	0.294074025	14.07994516	1.100322593	0.559298516
CG7381	27.66218936	20.34068658	4.932320514	4.050395077	17.10980572	16.64953374	9.484082016	4.326505334	10.46660976	8.782395686	13.61582621	9.376244423	19.60931752	22.85533306	9.822780536	7.939701696	9.7501497	8.96519847	12.17587174	27.1416088	23.52467617	3.725406814	5.146529882	1.97097639	3.976850583	4.168373736	2.788629273	6.737141151	7.248570511	6.882290107	1.194564757	2.043754532	1.431118184	57.66884715	56.32160241	59.42971347	0.398225277	1.428394154	21.30438506	19.73882714	0.545437108	1.024494932	32.36062203	0	2.538530283	0.2652666	3.863465612	0	0.476373596
CG7427	3.851078205	4.679468991	7.219203632	10.3322464	8.318944416	11.66999194	12.12500838	6.842133645	5.949397117	4.94709343	8.799365169	16.18598148	7.440175776	6.353497101	5.685534227	14.0403417	7.932610634	16.44640128	12.57505775	8.595280622	8.650771215	5.504512222	6.4057095	6.336665898	7.919485407	6.643673111	8.035931222	10.22598038	10.20987495	12.97801554	6.659226283	6.605896063	5.367054947	5.625588374	5.229727178	3.946617606	36.58725537	10.62519693	22.86507227	20.22500514	8.648947204	9.78449946	6.405393064	1.928335958	22.43660513	2.703746965	9.207662467	6.851871682	8.342383026
CG7544	0.40771687	0.329226939	6.076116541	2.047550175	1.998528544	5.341848777	15.07209665	5.808294	1.972881552	0.455779394	4.196327759	9.824035436	1.754213274	1.665622745	1.635443841	13.6012251	3.824790527	8.548210166	8.391279187	2.631851324	0.334873855	0.932743837	2.121964961	0.681558945	1.332434867	1.865547395	1.093555123	1.105902826	1.719245048	4.12927288	1.07358032	2.612655632	1.24230488	1.064794757	1.484642218	1.172280188	0.249465592	0.886111035	23.30178198	22.25542645	2.894479146	4.57345923	1.145045863	0.40720926	2.87933718	0.27073947	1.779860566	0	0.562913536
CG7546	6.262810286	8.416556144	18.09279271	6.708366609	8.893263027	20.45716165	34.68772694	25.2228007	15.15606884	9.886250242	16.57327341	39.55066855	8.414282334	7.319645213	8.759891446	31.001951	16.37471263	28.77351632	33.78328624	7.024497882	9.347565168	16.33951775	18.33359254	18.41140615	17.76901886	18.3649006	21.76217746	23.18708936	26.77507487	30.3086266	13.31923729	17.23826407	18.03798801	10.8320534	14.16363411	14.12960489	11.48140867	29.76105712	48.80207388	42.79072511	30.09573761	31.21232977	11.8806114	8.544260007	37.49189455	1.721984381	25.31857101	23.66376202	15.04230575
CG7567	324.0694525	380.1119818	60.03729027	602.8481621	517.66168	349.710656	5.950492306	19.0823199	185.9005728	222.8264118	276.7430885	14.16464287	605.9627347	692.8295172	692.9866161	12.11525666	148.8493482	16.31221973	28.52843412	699.5756019	750.8692784	0.019263131	1.974263877	3.182279683	0.958482526	0.039280735	0.933979078	0.140033631	0.41384129	1.231415338	26.90981966	30.97989521	70.4893892	256.7669927	148.5539241	394.973821	1.351935745	1.690485907	0.047251486	0.012339287	49.49954596	43.60724951	2022.389878	2.600851491	101.8407982	30.57649834	0.376489732	10.28188935	23.89360777
CG7589	1.362319104	1.167763869	1.789632286	4.158051166	4.444449816	2.004911028	1.179218397	0.735983614	1.097367831	1.231174356	2.517697935	2.523229929	5.299376564	2.734777761	2.104551269	1.084842548	0.787648773	2.898437143	5.817676882	2.827844598	2.557253088	1.321288918	1.213700971	0.822693362	1.245755494	0.902590908	1.452935368	1.793711162	1.574172035	2.312035575	2.762553977	3.145816288	3.823998997	6.982585981	6.655465326	6.642242632	1.809761179	18.52008677	0.015961885	0	0.218670873	0.133441126	7.515099717	0.015355482	0.386120888	0.465518222	0.032107961	0.669300968	0.298374051
CG7630	78.80572709	90.02680454	77.50828399	164.3530301	323.6697223	201.5550345	121.3284726	30.18206475	90.92095622	68.32678051	244.6857617	237.4437209	292.7801119	352.5989315	222.1793052	114.2047199	80.26125364	199.6202368	263.0508526	291.5494966	433.0033419	143.8334169	87.30818844	85.77952595	185.4588337	110.5115122	81.03660369	248.1539932	120.7808909	138.6346737	473.702362	217.2032657	124.9369034	207.8270862	105.0032885	107.3015422	75.2386001	85.53439532	90.21276773	78.55698005	56.47535799	54.18950078	56.77823697	21.61792797	52.49471735	13.58698723	62.29020394	49.02833783	21.71349683
CG7708	0.183196894	0.201074973	6.594987126	0.603701042	0.269358888	1.828628259	2.772362986	4.085257181	2.138875402	1.739187841	0.946819371	1.656099532	0.688169201	0.462547681	0.781928218	2.615866345	1.756560524	4.312372761	2.810524722	0.270799062	0.427755207	25.90275974	22.38648107	9.978716708	26.42555261	23.47278273	11.33677004	41.9748497	45.03274805	32.99664196	3.144547413	3.170235595	1.980603493	0	0.116950466	0.010293565	0.00623727	0.217151478	0.032212391	0.017795277	1.358560092	8.937166786	0.025946094	0.014427018	0.615474327	0.01921732	20.23118578	1.584385791	0.204384354
CG7720	1.822911049	1.116521712	2.085499166	4.937897618	8.756774022	3.319436177	0.917397312	0.905493583	1.980642557	1.696255849	4.329707605	3.689891438	10.80041292	3.253622638	2.23660022	1.636520787	1.542333072	6.105753041	9.9209295	6.007999189	4.417237356	1.171765555	2.489339114	3.496865066	1.030208314	1.533768154	4.303502866	1.573953576	3.817372962	5.201156311	4.353394321	3.798745988	3.746535554	11.72474317	8.320512705	11.0804537	1.330033995	3.158907578	0.006772448	0.008025031	3.437245378	0.671153198	4.947454536	0.003210215	1.221104787	2.302781234	0.26040425	0.747015456	1.022942304
CG7829	0	0	1.126154681	0	0	0.383665796	1.053518128	0.154934181	0.608618175	0.680194802	0.370906648	1.77457965	0	0.11688501	0	0.828380819	0.277425957	1.811590883	2.927290386	0	0	11.71983854	3.748220554	18.05391535	13.42644247	12.39721302	19.20998084	21.72308147	14.54482932	25.44945644	0	0.067036352	0.032778746	0	0	0	0.003863805	0	0	0.02135668	0.022748042	0	0	0	0.009781721	0	0	0	0
CG7900	1.556005523	2.125366964	3.359576065	12.25867152	8.673128909	5.606623384	3.948770602	1.540847263	1.342753932	0.953970432	4.065094331	2.774499914	20.11244498	8.222221862	18.90656862	1.744885813	1.060016118	2.752416048	5.646059303	13.16488526	7.106703601	2.845515658	4.305214615	6.664165027	3.531723852	2.571015417	6.967846653	3.401923515	4.201493585	7.67757377	4.65267734	6.293112971	8.09261664	17.87093225	8.387802335	11.276408	2.032236773	2.798353885	2.975705527	2.022493099	9.999939286	1.832461846	6.439733801	6.049649093	2.440398837	0.905990066	0.055833561	0.818518927	2.573377126
CG7971	8.410720039	10.46687734	20.71857803	3.554473649	4.932338341	13.67699321	29.27091506	18.72563627	25.98164117	20.42055163	13.27781241	27.56212232	4.143990676	5.152269906	4.299473995	25.17623131	19.34386416	25.28625994	29.78057833	3.417828014	5.737903777	59.73314843	58.17821917	34.8892806	48.21629876	63.67018834	35.50064728	88.52748623	99.30498555	79.63671845	8.361126967	11.59698352	9.166370819	4.255645222	7.117067536	5.479112772	5.385778153	11.08005489	30.51061565	36.23713265	26.03824991	75.51406305	4.994043062	6.148974355	22.92629961	0.800003084	97.08915896	16.54154564	9.251125934
CG8012	0.319134299	0.25115575	3.114558362	3.559892666	2.616341115	1.674075812	0.147534271	3.890558095	0.816002234	0.875503011	3.584062808	1.028735329	4.052214708	3.83152377	1.678404639	0.822707879	1.444837134	1.089974473	2.136224698	3.762318957	2.369265069	2.677443591	1.677788765	1.28263585	5.302742245	2.890721607	1.784982564	3.683440923	3.124827922	1.468638318	8.187445933	9.144283036	5.9166862	8.235091572	5.070811641	2.292091777	0.648026831	2.175856968	0.625996884	0.314499543	0.804424947	1.721364166	1.651753922	0.337968083	0.107877519	0	0.841152531	0.65818424	0
CG8083	0.408747353	0.404848923	2.404086991	3.756015724	2.053702792	2.065716999	0.848057308	1.532205351	0.530234368	0.55455803	1.957665642	1.142210853	2.099644419	1.533586762	2.416413778	0.60901871	0.023854205	2.471234367	2.985315104	4.002528314	6.223869862	0.003560824	0	0	0.079106789	0.008330381	0	0.019736634	0.015335636	0.058440878	0.225689249	0.19021337	0.377309549	15.7879312	22.04056539	9.111771353	0.761440897	1.398881393	0.017197359	0.336168509	1.031549527	0.081529983	3.41381192	0	0.421592404	2.127433711	0	0	0.051531454
CG8086	3.889157536	4.231674436	10.33084003	2.189783715	4.544270844	5.568656569	6.535684394	4.916638893	4.345780588	3.626996882	6.074769519	7.442612552	6.68029512	4.210426637	6.885639793	6.393857077	4.353913462	11.39373835	14.30402485	3.143602103	4.577453587	16.76518969	11.6063776	19.83626859	20.43655895	19.06943886	19.81103679	25.79726107	22.10341757	28.8790507	30.32193357	28.05495319	28.26096912	2.457669388	3.409574954	3.101556043	11.25144801	2.251229221	0.114088545	0.248657092	14.0959962	4.703669358	0.544256595	5.281556344	4.279468093	0.067940092	3.719011948	2.141357742	0.858744369
CG8129	6.890733886	5.983708733	3.329630565	9.033307848	10.14102436	10.44425892	5.856567796	0.247295738	2.611387287	3.966384044	9.096597293	5.327748197	14.79427443	9.149593501	15.77183048	4.27888676	4.520590075	3.067162616	4.072499211	18.45612735	17.99720989	3.617097791	2.555274113	2.833333244	1.778463404	1.810254584	4.198184835	4.885923615	2.529923232	5.246482011	7.847968273	4.750395511	9.698926276	3.682969607	4.117275909	3.282366751	0.120629049	0.13408286	0.042079952	0.00830993	0.292743116	0.19290158	3.10635425	41.6295769	1.775625413	1.32624692	0.175176503	4.957908435	10.09665513
CG8147	0	0	0.430637358	0.036166887	0	0.027158013	0.176022108	0.509110412	0.008119346	1.059752826	0.097793133	0.29106843	0.195940401	0.421967167	0	0.235670963	0.128314596	1.971051827	0.114394358	0	0	1.083176624	0.567702884	1.416125938	3.302222265	0.325701117	1.582004178	0.610176853	0.638162003	2.171961693	0.330966974	0.378788144	0.316325301	0.070813418	0	0.036479262	0	0	0	0	0.187348309	0	0	0	0.028854905	0	0.027657643	0	0.105319152
CG8177	2.954401984	4.683614712	16.47171042	3.840250394	5.697890047	16.60408537	32.99623013	23.73146645	8.255690533	7.402371461	13.25186492	23.90736702	6.644319515	5.806239783	3.745329527	25.64881116	12.68689662	26.25663106	18.84970988	4.729322231	4.2146477	32.08716587	30.31763567	13.8979025	32.16392727	30.12824556	17.67847418	52.50489449	48.93476905	40.60226394	5.190079674	6.471893871	4.339818107	10.86737258	19.51475715	9.582572918	1.543785342	8.660572406	38.95043049	43.50064963	5.4150778	3.791791838	8.077368752	0.138655508	4.750805832	2.357004105	2.719155962	1.167359618	0.964966032
CG8245	0.037353219	0.469026073	3.458191412	4.058737404	1.039194416	3.334498907	5.552006446	6.592484576	1.058481731	0.886535093	1.876462866	3.904762975	1.500393308	0.917035047	1.229746837	3.74757184	1.795408685	9.314366592	6.557146413	1.513357055	0.32845768	14.53310169	10.53120254	8.075640032	17.98700225	12.9250473	8.171479492	19.0652456	24.29085374	18.37194158	2.128477896	2.293354216	1.060547062	0.28818896	0.335209101	0.091825191	24.1666189	6.460390954	0.1017065	0.06610616	1.643874415	10.60886521	0.227102277	0.192680836	12.71033902	0	42.79940426	7.909493027	3.743390764
CG8292	0	0.84638685	3.335865648	2.258371058	0.487475742	0.810598989	2.586911758	1.710189431	0.544941814	0.030508717	1.125474553	3.299344982	0.555573651	0.573397245	1.278531525	1.102057203	0.205955111	5.70532938	4.574365337	0.76330863	0.581551258	0	0.041786829	0.17252661	0.035070418	0.255600547	0.184230856	0	0.040596199	0.277075559	0.189550835	0.078555232	0.257461844	0.53064556	0.145724874	0.312115113	79.76992915	6.015445899	0.003741632	0.016677549	0.041228674	0.029638126	0.382445549	0	13.65114741	0.000624837	0.276079123	0	2.950014183
CG8299	28.29654055	19.42471314	1.39233649	25.54962848	64.72850064	26.00883641	0.010312276	0.42862448	6.53037739	7.50240408	21.20660596	1.885182429	41.57211126	42.64690058	35.33084682	0.032084399	10.06743303	2.253358132	1.215589945	57.31272982	72.28844628	0.002753241	0	0	0.045707676	0	0.021130061	0	0	0	0.151957838	0.118250902	0.333916909	47.93183988	16.94613346	18.74570575	1.246811093	0.913021246	0	0	0.175760338	0	40.60581538	0.584518405	8.422934771	0.9023876	0	0	0.020194805
CG8303	0.449201424	0.543282337	3.551794796	0.667867856	2.314583464	3.384741092	0.777076243	0.799394599	4.686526116	4.732048129	7.537923566	6.700804665	2.030090485	1.413240407	1.442573701	1.650440875	2.388062303	6.63690793	6.121938563	2.807013826	4.034506718	2.211529156	1.650110846	2.610573665	2.127189959	0.927300683	5.14370015	1.824278553	2.317065388	4.446926231	3.256019527	4.92581952	5.596125749	1.630259445	3.196671131	2.199551754	2.222137566	23.34017824	15.52911884	11.19240009	1.111124938	0.385062562	1.043563762	0	1.299354772	0.053312682	0.53631225	0.198021066	0.464818647
CG8317	17.15548392	10.34159206	65.47177785	27.43875746	20.27046382	22.29233493	38.68915286	48.94135191	10.87663802	9.386211598	14.56838535	24.70197632	44.14230507	24.74385446	80.07651286	70.51201335	16.74910915	32.84340367	15.16079854	21.77461117	21.13841485	44.91153786	55.92628964	85.35558343	25.76229137	73.45872574	89.60956348	44.15352445	36.43049321	61.70096263	57.76096603	59.30321322	118.3587392	5.000900647	3.863536401	6.585592638	1.661645717	4.195320288	0.891267369	0.272055917	23.79504357	1.314939116	9.689770211	236.4345522	1.966434172	2.41763595	0.375206069	7.300086584	30.80392787
CG8343	0.039020788	2.453611219	54.61671742	0.133696029	1.52098103	31.65630384	69.35061265	23.6338871	58.20169912	28.79575745	34.97508153	130.219823	0.043382236	0.672285103	0.309272813	90.95118746	49.20997739	128.8732407	84.94535887	0.190196968	0.261639025	339.9009519	233.7361121	574.132236	353.8203915	797.3500466	738.1982136	875.8769587	884.3126918	1883.558586	0.767285321	4.056038895	0.284446927	0.140451766	0.158939385	0.285967372	3.252977969	1.515689729	0.079059304	0.996397386	4.57648155	0.048904673	0.055970443	0	0.029828678	0.133455507	0.437898758	0	0.100356718
CG8369	5.77610548	6.662439172	9.617286396	22.88489173	32.02243094	7.698216436	5.544801568	7.766569869	8.603846217	7.981121401	14.63622646	11.52072342	28.89487916	20.48071322	31.22639382	8.379814233	9.914471436	13.60121664	28.19072182	17.64231543	28.89639358	51.24007626	44.5121101	56.97950788	95.51980338	49.44080041	63.27781852	113.3269463	108.2534382	104.6133708	17.6753477	14.54804892	21.78393408	5.100438082	2.555231306	3.644093509	9.871269601	16.71145699	0.144206473	0.080625852	6.28385485	9.680417186	6.565279374	326.2853534	5.189331777	3.081037825	37.70194703	29.51869232	39.65876949
CG8519	1.848346306	2.379756954	6.226778722	11.22505476	3.917516373	6.06129296	5.185344975	8.477197182	0.871850331	0.97030782	4.263374974	3.481680776	6.54670828	3.834556141	4.534202031	3.110563322	0.631592678	5.420773343	6.938115588	6.402626939	3.008932735	1.285963216	1.566704547	1.735691718	1.011817066	1.479774947	1.490406275	0.882265151	1.483976758	2.206230602	6.859400924	7.397675452	4.710023962	0.31783459	0.333885929	0.11343474	3.924703741	0.67160234	0.057162236	0.080276171	18.18341704	0.49815532	0.276948721	0.185146936	1.15007738	0.132550983	0.768599377	1.977574224	0.328660265
CG8547	48.00820693	40.00335773	61.28174953	42.2569061	33.33464934	52.6828128	48.11242307	51.95813059	34.16165547	26.04421464	39.42828561	47.24058881	41.38222885	40.00279548	64.24457773	51.52468661	31.66067847	59.3125014	99.83082455	28.90600907	37.82197386	65.42664554	46.68163909	47.57378383	74.40988567	61.03263017	51.0563966	84.7339103	59.73958147	68.97817438	150.4031082	106.3467979	100.0965031	13.66428947	15.37745115	10.98426594	2.511423767	21.13495298	2.63966206	3.144442021	129.0309216	14.15226335	11.01575237	22.62267383	22.92920754	8.315363776	14.11256819	30.51364435	2.51804376
CG8562	27.59242771	18.54717559	14.20106904	31.40462235	97.77535056	34.99845773	1.38613275	1.276795946	5.137273518	6.783291211	42.53755795	15.26680918	82.31813521	72.40004259	46.12350789	6.964871429	5.785987734	28.60565476	22.08474774	66.91146921	75.06657643	0.113934123	0.010248268	0.019539316	0.205500971	0.006575801	0.036748788	0.02117607	0.081252626	0.00680631	1.174149861	1.235411162	0.919420637	375.2536612	213.0792078	194.3788568	13.32830315	11.09006664	0	0	0	0	12.23484095	0.035603447	6.584881693	0.015555029	0.021102444	3.702336902	0
CG8586	3.367246671	3.779480708	13.96538644	11.24350164	13.67441031	5.315022122	7.531382706	9.594257569	11.40131982	8.01470664	7.323257344	9.569891473	8.589412002	9.919179679	15.37245326	15.35733449	6.631264398	16.38171867	17.85698007	11.05206614	11.39717201	40.74632363	54.17595575	84.29915761	59.6095142	47.62731633	114.5887576	46.05699446	63.10235637	103.4230697	51.77234185	44.43235929	60.79517527	7.501072553	4.608675854	3.466710244	3.951663948	26.99588045	0.306161519	0.09125553	4.7449421	0.505406969	3.067711825	105.140669	0.431477823	1.757203045	1.2218515	136.371429	158.878945
CG8620	4.432319109	0.77827953	1.228174297	0.909463748	1.25287294	5.818831303	24.55632938	3.527322326	1.336399886	0.61366692	3.324824338	13.10717347	1.410685738	0.896788468	0.827046588	3.234703656	0.561784873	1.210844167	3.795633819	1.057220657	2.490951508	0.499885553	0.228177313	0.586890864	0.568212682	0.237487814	1.111523464	0.222137105	0.335777739	1.920363231	0.652831331	0.825879547	5.009038633	5.046450441	4.646938535	4.7911558	0.944069364	2.207999951	0	0.233930151	0.736185348	0.32512344	3.592268185	0.274479247	0.547619481	0.112132126	0.140051441	2.877522824	0.378242011
CG8661	651.9769666	338.8386505	57.45952864	350.3499848	326.0789274	122.7184874	2.513938748	16.33100719	146.0325536	142.9124377	206.0198831	47.98617837	207.5977454	232.8704127	243.2185685	31.73562069	157.0216138	91.60707805	6.240093853	256.0055673	380.9099367	0.401096151	0.02068722	0.497075672	1.394463589	0.163824415	0.382721036	0.061785419	0.076236753	0.155069884	3.224947368	5.322812798	7.157833966	784.6346875	891.9859996	611.0547076	18.94942799	16.06913943	1.24542738	4.129543024	5.464065865	5.594027643	1073.848261	0.237381293	135.6331025	22.08764464	0.199246963	1.21973584	3.62922899
CG8665	8.195681381	2.050575545	5.279467683	11.1943012	16.4578297	9.396135719	0.844827215	0.759964315	0.713028936	0.522805534	6.329916351	1.17312358	5.676897588	12.43275214	20.82979405	8.859833141	1.131446986	5.182573251	2.240554759	16.45677554	13.13432817	5.144423611	9.78508475	16.92981059	5.627096777	5.336465631	41.38534559	4.001934133	3.189079814	9.148709005	5.333274221	7.290703575	21.9097895	8.598602194	9.456372477	10.70499611	13.90293206	2.512430323	0.060127311	0.050237801	1.861087521	0.263195404	6.239517585	45.30572803	1.188730467	0.528018479	0.320489536	3.368909179	0.434846354
CG8740	6.184999763	5.092571005	5.341678941	2.284932733	4.411670146	5.432742432	3.674904581	2.737713512	5.30824723	3.929615395	4.936285799	5.841001132	4.352566031	3.0170408	4.400751627	5.020040201	4.373499357	8.487056923	11.29312711	2.592604638	6.030193557	10.240413	9.697351714	10.13020346	12.4333271	11.40821241	11.79060047	14.49557652	13.93741018	16.03022564	18.53168938	13.245029	14.62864967	1.899789336	2.427132151	2.427567817	2.268871594	5.560980964	0.117585108	0.076514072	30.6708642	2.634488472	1.653883119	0.477810062	11.9682243	0.092488388	0.687301264	1.44456231	0.868648784
CG8745	13.27439029	10.38552692	23.81692448	47.62895081	40.92225462	23.80333846	4.02633871	10.51964519	11.11480549	7.244596137	19.85578742	5.69889917	24.18101127	22.13021547	16.84381796	9.703110199	6.54071357	23.05026703	16.89747924	46.20286783	41.34685419	24.41368254	14.87267551	12.85560495	21.43112492	12.7558462	14.95797876	23.39765444	22.42644147	16.56591623	28.3739703	25.80592055	18.23428236	40.21439603	36.77751723	37.20952869	1.996512676	2.46038896	0.333364026	0.25514116	5.49691729	4.019472626	64.26293049	102.4691452	3.320455498	2.485887404	7.726262961	5.660112342	176.0493929
CG8768	1.893235849	2.815806696	6.611607576	4.612362681	6.358951442	5.361170134	7.958379298	4.378764743	2.216380272	2.152117812	6.215021764	9.846077236	8.007063868	4.07379359	5.447107359	8.188097513	1.785459175	13.63269351	11.99174451	7.620795313	4.611533801	3.453082458	5.149321301	5.72965457	7.768387313	4.808250686	6.244953067	9.030304651	7.14913222	7.543258386	13.63778042	8.588650871	8.455249841	6.546046908	4.081061104	2.850125022	4.760304103	3.172128425	6.595608368	5.639160071	3.279515323	2.189391597	4.332645387	0.412431406	3.612416516	1.566708907	3.348945956	0.185748438	1.428902618
CG8773	36.03617621	29.09814235	16.64540669	27.44497613	85.26056769	57.7118359	0.941350866	1.900233317	4.478759533	6.269308076	37.17410621	5.417596946	92.81860648	78.64398173	50.0521615	4.493104379	6.412399934	15.4907804	18.50930365	84.88568448	81.24481453	0.09524667	0	0.027450377	0.384276154	0.004601418	0.07104552	0.027654887	0.04844331	0	2.118749137	1.7627575	2.852083851	308.2496429	209.2518339	209.7844773	8.06038769	7.55074948	0.114185716	0.018918915	0.451589627	0.010641001	53.70017041	0.108919972	13.51729286	0.977789546	0	0	0.083162183
CG8774	15.87664381	10.63067645	6.811143176	9.876125467	33.25486589	41.17296476	0.882843516	1.972448052	2.501890878	3.118818021	25.80763984	5.095971504	53.97621079	53.16071588	28.36233743	2.819886862	3.179808929	9.279754821	13.82104488	49.33753009	64.76635176	0.132929248	0	0.059978678	0.158649193	0.003048725	0.025629766	0.119886876	0.098777377	0	0.618897408	0.719146853	1.536731161	96.89548542	77.95353324	71.24223654	7.318276211	43.28090971	0	0.005955834	0.079542008	0	16.34559024	0.162951247	11.44246873	0.518666893	0.019652437	0	0
CG8785	12.73475005	14.79407061	9.756608514	27.64066266	15.56359202	14.58126549	2.91864761	2.985183259	5.198103118	4.939663183	16.26588245	4.842758992	30.17754161	36.59295888	9.66119467	1.98247022	4.814321993	13.20305028	10.18819109	26.21933345	23.42105894	3.967350997	2.060352646	3.056445856	4.600194167	2.514500315	4.627370994	5.378432567	2.224181987	5.772165929	6.147372809	5.660463218	5.634441657	86.32804082	91.93781153	69.67500061	1.592671296	6.139478843	0.105837455	0.018940809	15.08874122	1.318210553	35.48012242	0.215643808	6.019658946	9.786242987	0.183305362	1.938574555	1.443456268
CG8834	0	0.682477357	24.88809591	0.076910302	0.263622483	3.109554671	5.652509915	4.862919667	10.22355429	11.36910282	17.91026822	23.58760589	0.07272274	0.460326219	0.068206277	29.87090264	9.152927195	35.02196884	68.41251674	0.45040165	0	1.271278971	0.034541704	0.22629335	0.506500558	0.105887022	0.423169426	0.041322781	0.122522885	0.068851062	3.11706516	2.413823104	3.391237845	376.1256779	290.7824977	307.7849003	6.768549992	11.71585325	0.106453768	0.004357363	0.031314205	0	0.848998091	0	0.199467274	0	0.019170628	0	0
CG8861	0.068252583	0.4286062	2.33937826	1.109806215	0.754617955	0.911639515	1.643070171	3.300297739	2.800748158	3.329603988	1.336922594	1.851917424	0.331681823	0.575146382	0.631706812	1.088249786	2.487624146	2.81923413	4.622691988	0.721673324	0.659940354	18.03546081	14.10660005	8.226861703	20.33665846	15.54878169	9.958349629	27.41417744	31.46681076	25.99988883	2.372320992	1.896041548	0.970706988	0	0.07757563	0	0.031369234	0.384750437	0.037357111	0.021723279	0.8444884	6.819996077	0	0.05830349	0.296049573	0	56.85868171	5.867701419	0.151940961
CG8907	10.67396391	8.301568528	10.29891826	6.111056654	12.92961102	12.5187299	7.784710539	3.813358448	4.137030305	3.338935019	9.672305718	10.04595254	18.38433486	15.80413136	14.34663348	8.020828342	2.538535001	9.312125667	13.24497811	14.18953054	27.98427441	0.323928357	0.266210919	0.470416154	0.368905965	0.15947668	0.597061439	0.057049685	0.26249942	0.400913051	0.982275284	0.88105516	1.875295394	47.66450237	39.74922756	53.1578082	0.783129099	2.668911013	0.218503799	0.074859009	0.230124436	0.141866188	22.95804978	0.498349591	3.679992368	0.466354713	0.106268956	4.815498726	0.858104703
CG8908	57.45992212	37.5076627	17.8476938	53.82812842	88.02398973	50.79941318	36.31388253	10.34501044	43.73274492	34.52358778	71.71055178	81.11973125	57.69936283	78.99534869	50.65612569	39.47316678	30.21971484	47.3132986	71.6272017	63.34098462	89.08497214	20.4520088	29.46911748	37.17985537	22.44564346	34.90422954	51.08529954	23.42545066	20.97293996	34.90681893	24.4438541	30.6453033	36.9960988	33.98258275	24.96671561	29.42551555	37.92652329	45.38225264	44.8578809	39.65882869	41.51842793	38.78802293	34.97221237	31.75350659	49.96028926	32.84109694	16.34382571	36.48568235	22.60533074
CG8974	39.28537751	27.18412948	63.3167975	58.9118894	51.33814873	54.58030187	65.74899585	39.28117104	52.59665677	38.17055567	77.08677415	82.35006046	48.09859667	53.5948699	57.27661084	66.16569455	48.68872836	86.8158005	101.2284251	46.44707387	45.04675408	80.9338153	122.2468699	77.01091637	90.28646668	99.69139925	89.27892334	103.047897	125.1928513	200.1249808	52.18011284	54.16182515	57.47966231	69.51998861	66.95115956	63.76394545	76.58996156	57.63405268	60.96981069	58.07173646	62.67570197	54.86450972	72.64516539	27.05517257	59.96546455	41.62663417	50.89813878	49.33894741	59.5583713
CG9090	44.04878929	38.15146	64.75521239	28.24097977	67.73520774	58.41960779	33.01739675	44.28814958	60.29034304	29.87075511	108.4530309	102.3634975	56.47362124	85.07896751	69.74377377	23.33909611	41.40960942	107.5568931	135.0561712	50.43444672	97.92541797	124.7333675	41.01687595	21.94158317	165.6156136	54.63717048	26.50009767	116.1391018	45.81614234	31.60246727	800.8311879	250.7272303	78.54331814	8.587552172	4.209600621	1.568142375	1.059652879	2.427481386	0.151939624	0.138494887	8.397025426	0.224285578	0.514720701	0	0.253585402	0.046291018	4.639362376	3.965618927	0
CG9095	1.007830171	0.600188417	3.255533849	1.214280891	0.58806876	1.446380586	2.660377303	1.806754427	1.951167568	1.287073105	0.637566257	0.67884772	1.029543359	0.557645419	0.899244381	1.698251057	1.400070378	1.497621738	1.767697215	0.707309074	0.288209663	2.015133657	1.320515397	1.60416544	4.813473516	2.619448642	1.270680819	4.002360044	2.246692813	1.69177059	2.740377125	1.314596208	1.2699536	0.38603198	0.784380823	0.541326677	0.625865448	2.176059787	0.12833478	0.187990454	6.873546275	2.20875323	0.863999175	1.487126306	2.60713422	0.054116238	15.12878822	36.09951632	2.820208235
CG9150	0	0.020914457	0	0.118365962	0.593794835	0.1547156	0.624469803	0.055203865	0.631747723	0.649099048	0.104126722	0.266818591	0.07288923	0	0.090636357	0	0.246960356	0.19304553	0.845875107	0.196559618	0.01412169	2.204721611	2.289742555	5.106306388	3.625885393	2.974039765	4.779252681	3.30431866	4.034516462	12.30885019	0	0.04746061	0	0	0	0	0.091393192	0.233563692	0	0	1.424214917	1.298635017	0.141827001	0	1.340392447	0	6.522748596	3.166819121	0.693366767
CG9220	1.953637866	1.7328511	2.593160693	1.8623414	3.695574065	2.056881678	2.02363621	1.084297234	2.8799548	1.589564934	2.558087045	2.229888883	2.604754994	2.905356875	3.035355	1.319860885	1.167019489	3.658542581	4.920523538	3.280919751	4.803214453	1.853000474	1.969810102	3.03000301	4.091390479	2.72818154	2.762748528	4.616585728	4.276651534	6.133295933	2.918871659	3.329567893	4.079052256	3.606173277	3.766844927	3.900121621	1.093090795	3.505756407	1.108994176	0.522738751	8.605765679	5.11804684	2.854833203	4.005398382	4.956568728	0.935157336	2.649752823	2.904884886	3.632272151
CG9279	3.167695306	1.500088364	18.06137816	2.276012123	1.098140074	4.119667651	8.528163617	12.80483292	3.100948975	3.446313659	3.169323977	5.699840985	1.069781341	1.134782877	1.607021247	4.151704927	3.973249976	10.42683573	9.78688751	1.31802148	0.776471276	7.469574269	7.21498676	4.612920548	7.968236307	7.355604285	5.98801786	15.77770237	14.13545379	14.22214136	1.899812628	2.105574875	1.70000453	0.774465926	1.091135501	0.287293691	40.43813171	17.95098833	0.15596632	0.260293905	1.552888456	6.070158115	0.457043681	0.501869825	33.01650679	0.203978653	19.62576665	8.240620558	9.787987091
CG9297	682.2896521	499.3652872	486.6735381	115.3223297	158.4094774	305.6590636	216.0979925	344.1572302	247.2654086	151.9074457	298.9923165	213.9774148	195.0141018	255.8355484	241.0798439	143.7864699	229.6639147	379.1512457	349.5440034	135.0740973	166.5936929	692.5560414	254.5548614	54.25609476	634.2572017	270.1465678	55.05152995	639.1975393	270.127067	134.1006088	1790.517228	1037.223055	194.9896328	17.46737789	24.16414023	9.869410851	0.457256274	6.366135186	0.684523868	0.850439781	109.3167898	4.95160829	1.747450544	0.061814176	0.872748238	0.632115723	22.75841473	11.69591014	0.169892281
CG9336	10.64391781	5.406894143	32.20003804	47.59094144	24.16136652	26.01777273	25.90008591	10.40584342	31.52434911	14.7125126	32.54398676	65.86126556	39.00770166	31.14832816	65.43891362	46.58248	18.74851144	69.50348745	138.2097041	26.33376127	37.07212636	44.24930594	59.84008323	91.55369354	46.31712226	73.23551563	137.6213566	83.8875706	83.75727584	175.5897776	50.7048597	69.35670033	110.0107623	43.75788248	29.0532243	38.43673269	125.5455404	225.900719	21.00397656	13.40386083	81.81809064	12.72989022	11.87602675	1.02666216	9.45480272	13.84535543	14.36408621	42.73416986	1.433721535
CG9344	7.308733382	11.66354603	6.43721599	22.09394384	16.96419824	11.68318103	10.55030319	5.237688653	11.51748881	4.706367029	12.87844314	22.85287943	14.3573094	12.13501414	9.557067267	11.51388408	10.78202775	10.72692343	15.04587705	15.99574012	14.56881466	2.734410811	2.158325748	1.507323403	0.847410442	3.611728684	2.168509873	1.978173432	2.767961806	4.950348227	1.76352963	3.436363914	2.391704425	5.271545176	4.778642474	5.875662744	19.58309389	7.476500222	27.83966963	21.09616447	23.46466929	28.34589329	7.773437355	3.718532535	20.43421896	1.144541027	9.472931393	11.41285676	6.154913021
CG9380	6.25370624	5.718173705	8.35993073	12.77846641	13.74661042	15.63570404	8.309771294	5.814478475	1.90383545	1.808811759	11.09630986	7.457654706	25.88614201	14.64375939	16.89351947	6.488982349	2.695408425	9.887157539	12.36464628	27.59279473	14.97959539	0.187163548	0.048350545	0.024197221	0.097609825	0.004819874	0.259502828	0.023606832	0.023475313	0.183986814	0.929968687	0.614010731	1.455457721	68.74788366	51.38635917	60.04721681	1.148727524	2.036882736	0.040622278	0.011535603	0.111009461	0.095380346	29.75338518	0.322913926	3.454106218	0.189987993	0.63692424	1.258187427	0.766903534
CG9394	12.05379799	7.453063931	14.96665767	11.65697872	50.73376062	21.10843003	4.122585463	4.970953735	5.66393831	3.797027847	19.83920292	12.69303214	35.34737648	31.50241233	33.92922587	12.19334678	6.222596562	19.34111479	38.13026453	25.52178141	35.01401383	47.09193112	55.45071957	39.21618547	61.81777249	46.63629996	57.30508211	93.85029008	88.0336311	90.46220246	9.017126407	9.398715857	6.567130193	131.6016366	105.612856	114.2412091	2.495911368	3.167890931	0.140195225	0.364246854	0.901416454	0.457641561	26.12908315	0.014408084	8.185986862	0.504105318	0.613879396	0.203438765	0.066026168
CG9396	2.227023277	1.415391166	4.943322759	4.229476714	8.230844316	7.151030917	2.497969418	2.475266854	1.019985579	0.783949482	5.598214037	4.413093363	19.046991	11.13950228	7.500399502	4.249864988	1.285376106	4.873558451	4.094477966	10.41863259	11.97014611	6.473076585	4.897952707	13.25430894	8.899736884	6.621471858	15.53803017	13.50167556	12.2498978	14.99152712	11.60389707	9.119385298	13.5096441	28.29666592	13.51402015	13.47037979	6.574328825	2.621982076	3.32742809	2.502180992	1.299796912	1.161581233	1.688868013	1.227609312	1.316975253	0.268965222	1.246537431	2.465578533	0.513741857
CG9451	2.023224404	2.270934766	10.06917122	6.833777981	8.940785308	8.838283614	8.721551013	8.307535223	1.57164281	1.162211323	5.24338534	5.72808538	12.50459111	8.85202925	11.61416078	9.723843326	1.759553648	14.88364149	13.28366773	6.370478392	4.985780067	14.67804178	15.59820427	38.12219423	8.055217921	33.59873136	49.39291488	11.82877209	20.67213795	75.13227117	13.28066258	22.38194721	29.88512505	3.579723229	3.184209673	2.739207513	13.29355087	1.487018555	0.243557473	0.049297776	3.42382715	1.276466236	1.674813934	0.635968194	3.516924084	3.420401801	0.755270518	0	0.927234889
CG9458	0.266067664	0.083873544	6.269706188	1.328578747	2.110760154	0.992116177	1.240935586	0.524849634	1.21388542	0.221639273	3.197292591	4.825321444	2.624148976	2.462298268	1.065006368	7.975063083	0.971313269	13.15312046	12.00927882	3.179057141	3.178631617	0.083591612	0.152507856	0.031607717	0.123490633	0.016604116	0.525870579	0	0.154108583	0.057762575	19.24908784	26.70849939	35.47872979	1.091193964	0.689257538	1.036179245	2.961389664	0.333300024	0.096822629	0.048004701	0.347828524	0.035672048	0	0	0.144942482	0	0.044266355	0	0
CG9459	0	0.074582405	10.26213935	0.468023551	0.941972385	0.512684993	0.642053299	3.125650384	0.334611441	0.470940391	3.517360182	3.11042563	0.626377127	1.418737708	0.409372656	5.200165197	0.426671525	8.946097333	9.251811024	0.867701176	0.164926987	0.024316984	0.138059743	0	0.0119851	0.048425695	0.233710694	0	0.0595902	0.347367794	14.6289505	22.82580704	25.71072642	0.583218062	0.370125099	0.459051239	0.581784868	0.57701673	0.158118608	0.008266193	0.135047799	0	0	0	0.074435741	0	0	0	0
CG9498	2.558283664	3.831716216	12.98862419	4.061495906	20.1346487	10.52234146	9.720957782	13.60031697	3.685939482	4.989172211	11.21579984	10.66678483	23.28965345	20.43768691	17.84525687	26.90974463	7.79265683	16.09922667	21.3776553	12.48728526	15.42566768	13.16790486	32.61820803	16.43174608	22.17478499	10.12013684	23.64322033	32.20252406	63.61501868	35.06843741	22.93813341	32.22659128	30.26405302	99.32124616	99.99144186	82.55963484	15.0873611	31.12238185	0.273624976	0.400623082	0.622214965	0.011080309	3.851062602	0.068109226	0.791061411	0.075218317	0.068749188	1.154755206	0.059496629
CG9505	0.943432437	0.828662921	1.014427663	0.862217017	1.567397779	2.336353446	4.153142596	0.725981689	0.485026423	0.516933346	2.357241361	2.111907797	3.178246297	2.780806337	3.148259056	1.139830492	1.018230689	2.891310722	9.573473009	1.478240843	2.375590086	2.988161498	3.668862481	7.909765714	2.619132649	4.241973195	6.941094068	3.068932744	1.946827655	3.437063424	1.527527415	2.890428223	2.614523092	0.270785695	0.241745802	0.391929697	3.238020262	0.811746118	0.406124725	0.257171037	0.279772268	0.063461467	0.865469646	3.113511253	0.855833862	0	0.039272803	0	0.731707865
CG9527	24.9171556	15.91695261	5.335534647	22.0661525	53.3438347	24.48262611	4.58444624	1.639802276	5.992071128	4.322398319	20.78045998	9.56406041	35.86908973	35.2141559	30.11799934	5.37259277	6.681707759	14.30346204	16.37902813	45.02284174	45.6072001	4.738363107	7.201691428	5.926511912	6.056572258	5.721643933	8.554720347	7.070284359	8.175305484	10.82436869	6.886882191	7.795307715	8.143806484	91.97905363	73.1916325	75.14669759	3.041945667	4.304859695	3.04042589	1.885844366	6.411468652	2.518309208	21.35929781	9.40929191	8.515746989	0.329074984	4.377352841	9.493538095	11.28470668
CG9568	19.70801927	47.84915278	37.395541	84.85805066	58.48832095	48.27987257	16.04197212	29.59048549	42.87589415	33.53073394	45.7763657	19.4863824	172.4116261	112.0600605	61.58943174	9.222532299	30.53170879	33.65734562	31.25284376	137.1058741	89.09080189	0.987202786	0	0	0.157556012	0.511261823	0.321612962	0.018570965	0.069843949	0.24078648	1.678483836	2.450133323	3.743742598	426.3943379	300.6807452	453.3986307	15.78690867	12.04497633	0	0.634330773	1.727315247	0.049877731	476.4798709	0.559530351	35.52232849	6.268393723	0.991920439	34.75501143	2.745181474
CG9616	0.980078587	1.177706186	0	7.875016793	8.053387487	4.120233527	0.578711207	0.368944395	0	0	3.106527445	0.273594688	10.16684101	6.56695577	12.19738494	0	0.139738302	0.720256926	0.897221417	6.38319454	2.948647398	0.940159775	1.301757667	2.174275632	0.798475185	0.529328504	3.380031397	0.01583161	0.173720343	0.057084621	2.211194035	1.487103609	3.790065924	0.149553513	0.321541499	0.202423872	0.005829123	0	0	0	0.215272426	0.052756789	0.060182441	23.96250223	0.095748759	0.085196746	0.129446599	3.267456724	0.250970077
CG9664	0.838297387	0.556616411	0.931755315	8.011040872	3.738238187	0.792487265	0.321041881	0.205249245	1.548215997	1.379703603	0.915757917	0.263811495	1.367873747	1.366170757	1.890112034	0.21611973	0.560106149	0.65240855	0.907049396	2.992133259	0.844175805	0.585018028	1.182147301	2.123330701	1.307151547	1.775948967	2.277949886	1.174497098	1.907425418	2.469014937	1.021339565	1.185273608	1.032775701	1.893513758	1.396078007	0.917690081	2.469858673	1.013406128	0.071431818	0.010456466	6.2210523	0.694403804	12.46631587	7.476655924	0.585769895	0.679974529	0.590642106	5.993169386	21.36423645
CG9686	11.45526351	13.2681318	23.2607933	25.22641279	5.900341348	9.407355022	15.6615899	11.60236117	47.13704824	45.50417581	13.65429062	20.05744078	6.050037501	8.861228178	8.279027259	18.73227132	36.66084215	40.64450299	22.5574847	11.11892132	8.568271427	121.1859209	118.0072303	120.7421117	112.8414978	155.1493929	143.2620773	163.6887807	172.0756416	256.6857346	16.86081755	18.71322553	23.12757445	0.136948289	0.270235163	0.223326378	2.248327562	7.087706507	0.309856001	0.092264276	70.04445517	306.0112042	14.15627139	5.201252846	8.721717459	1.026020823	272.8288386	159.2612838	70.24249715
CG9691	94.14413152	80.64773872	132.1529485	145.3453487	205.2568157	109.2372326	54.57894514	38.4226983	112.327157	74.11267912	129.6739828	78.90960524	149.7889443	151.9114467	165.7214088	99.26673301	109.3454977	168.3311488	114.1169514	139.7649781	233.377717	291.8655851	392.3333269	662.8583764	287.9849759	352.9774769	675.8476012	580.9880191	1007.112172	1417.24473	535.3835807	424.0563105	695.3225255	100.5861362	49.65427089	42.26938366	202.5993581	80.53195413	1.55976313	0.81428323	249.6907507	57.78500569	117.7293664	864.7660229	83.53641701	18.27444041	42.70106868	252.8474444	510.5620873
CG9701	11.89010019	11.47304988	2.715182967	16.07940042	43.64684686	31.35384656	0.390373	0.249073893	1.668069979	1.256250008	26.97587707	2.182506534	18.27537315	33.42971395	6.957652908	0.43562643	2.366180381	4.425767698	4.151620172	29.1569515	38.17452092	3.239933017	8.028833294	8.794693131	7.078501801	4.057956006	9.469103447	7.16883674	22.26238266	27.93980444	14.39928678	13.33557893	12.36832337	3.066146363	1.941263408	2.171178593	1.124438313	0.456983919	0.147776433	0	19.52125463	0.301100796	1.097298694	0.146146486	0.329915154	0.090731185	0.150766103	0	1.567297813
CG9733	0.054339083	0	0	0.224657204	0.047692305	0.567823794	0.57858797	0.124052715	0.373764212	0.082783188	0.227322023	0.208566318	0.796572032	0.961349906	0.488480613	0.026779823	0.015215186	0.158725988	0.959563956	0.121987432	0.536468096	0.173930942	0.447370839	0.660174157	0.189168221	0.491864104	1.741573821	0.792341195	1.137956632	2.274417823	0.730111598	0.594616145	2.503505987	0.108660319	0	0.177305633	0	0.192216606	0	0	0.469611935	0.03427409	0	0	0.070091829	0	0	2.223418716	0.022142017
CG9737	0.032400496	0.846902656	0	0.158479802	0.450416151	1.399522155	0.061785192	0	0	0	0.366777671	0.243329783	1.222150807	0.894066471	0.423329905	0.259134849	0.061129597	0.209160766	0.652192845	0.619779534	0.330499405	0	0.027771311	0.035299129	0.068051592	0.01383003	0.032767219	0	0.076979061	0	0.071172969	0	0.040055365	0	0.00705406	0	5.491740846	0.672424335	0.011397235	0	0.289413257	0.780859073	0	0	0.163656127	0.251696895	1.715950689	7.387121519	0.157739804
CG9743	29.54664969	26.04782667	33.53519942	7.325167907	23.5210866	25.11076111	17.71819228	8.880363191	15.27332791	10.76846551	18.4819178	18.50450279	52.15714417	34.54059828	14.2174267	18.07240046	15.67755561	25.55380361	42.37462223	26.83176091	42.5325265	17.4574166	18.52222749	18.33171823	19.48587465	22.21034293	19.56532285	24.64240296	20.54797171	23.73356887	15.5242309	15.11701705	15.74288156	174.4651151	117.2372359	157.1417774	15.60600651	18.59339606	2.338950555	1.515767601	1.853019217	2.294305753	36.2594653	0.472137259	6.509694981	0.66679313	4.441915292	0.365019136	1.018622951
CG9812	60.42668041	175.7862753	88.48863372	103.6886198	40.39460927	15.73935102	9.032472454	36.75236794	541.2639094	561.6994332	22.58662545	15.13162662	26.78881039	26.86957093	25.25172415	14.11510139	457.6275161	27.03737509	38.79402309	20.94439884	21.87855623	82.77792963	45.21335086	57.96643139	99.6701597	63.04141887	63.15303746	94.62900018	64.06229003	70.61377054	97.14977103	95.05278444	78.15837867	8.660083414	6.762610355	2.363916733	1.089658371	4.767815479	0.430645392	0.07095571	61.06620378	6.991467367	18.35381823	27.11983372	1.574989914	9.689646886	3.78725657	41.57391153	4148.195482
CG9821	21.49042018	39.06444353	253.7220158	45.22776699	20.28049739	170.6108519	456.7353844	625.6151909	134.8888096	85.13540307	91.9039487	170.6178518	50.20436226	28.18970669	53.43847617	431.8675584	186.3627868	272.8344318	159.0286308	26.9010809	14.82111514	139.0061082	129.9210417	85.42690768	105.7193363	125.2083713	72.84650486	140.1308703	193.9103094	164.6295245	126.332351	139.9257236	130.8065997	75.39796973	116.9371844	78.56117719	8.811001979	62.05846344	433.5323925	626.0403444	176.2949654	260.5103822	73.74662586	76.64274396	118.0269007	57.1615156	99.5328319	169.9468573	140.5963329
CG9825	6.98656002	8.124104803	0.411251667	15.65081022	14.90940515	8.661468334	1.050502895	0.995765219	1.006632369	0.677483803	8.468002513	1.442269065	34.75505919	28.89378914	9.505771946	0.003218433	1.318671201	0.675241322	0.169102667	16.95481228	12.51478024	0.006045916	0	0.018878817	0.028999028	0	0	0	0	0	0.087558145	0.108765874	0.232321384	14.37228677	15.67202532	8.186447757	0.030034401	0.102475238	0	0	0.178975621	0	13.89722448	0.157445805	1.356017607	0.54970487	0	0	0
CG9864	3.880129354	4.695607165	3.349179981	10.54683768	11.46329568	8.969466533	1.658800195	0.803632105	5.137816212	2.013333258	12.17004717	11.17052426	12.31161585	12.07386671	5.680252731	4.765815666	3.111628264	9.087883994	20.04494301	8.844529787	8.517581771	0.212650274	0.257248252	0.350337284	0.279020716	0.313265966	1.034788068	0.24983934	0.283789699	1.227223505	3.417207488	3.718959714	4.501055635	62.51891314	55.60166825	52.38793102	5.458955156	10.21731762	5.955225001	6.722909237	21.0668665	0.309680419	6.331465963	0.040554223	3.102577164	2.189503278	1.222344975	2.067934059	0.052082304
CG9935	0.501206247	0.00131756	0.586454748	0.373007928	0.098035182	0.203423828	0.687549487	1.264222182	0.094649533	0.070021826	0.406394461	0.750578471	0.025902715	0.048195627	0.193509617	0.831086192	0.066837362	1.393176814	1.110245976	0.071075225	0	6.197097445	6.454715572	4.317899715	8.309194167	6.932049431	4.577516981	10.5268436	12.9980215	9.718066459	0.056146808	0.067026407	0.161239575	0.061918694	0.008210758	0.038405097	0.020861453	0.214484069	0.022812673	0.007416239	0.422314203	0.812979069	0.020029566	0.688393038	0.6255264	0.08980216	2.106579807	1.835269837	0.214229712
CG9988	0.091846942	0.112266207	0	2.554316404	2.389931153	1.573246142	0.003025201	0	0.451794188	0.030060834	1.390794473	0.080580975	2.036002796	2.232021884	0.901237683	0	0.041106162	0.071021957	0.03521187	2.691590302	1.477351866	0.009764592	0.029569971	0	0	0	0	0	0	0	0.189659442	0.111162452	0.056866165	2.055079739	1.161820498	0.695247818	0.052108399	0	0.016026918	0	0.06228924	0.072912745	1.677514746	0	0.527587108	0.288069152	0	0	0.018865967
CG9993	1.910005099	1.859206441	1.111472664	1.998151814	8.477561229	4.481100769	0.510788815	0.072468394	0.287810661	0.086966819	5.257512145	1.171908095	7.242662013	10.18039469	6.012122879	0.333191141	0.746278894	1.083634806	1.206080833	6.093579457	9.286686418	0.005158871	0.041705344	0	0.040209559	0.004341065	0	0	0	0.027592438	0.443670018	0.437661886	0.251184934	6.892975163	4.117816544	2.843809605	0.005406598	0.2514993	0.010073193	0	3.543454606	0.294807435	0.00531949	0	0.051397629	0.101927051	0.057189755	0	0
CHKov1	2.521275566	1.932807	4.536044498	11.01567194	5.638966002	7.740832344	5.468502208	5.084990652	1.302387184	1.009646253	5.635795908	2.855398239	11.40007092	8.268806579	18.9832911	2.961010114	1.278886791	3.486191304	8.36701029	9.808772913	11.07577599	6.136775837	4.936949122	5.757046686	7.254917186	6.129080443	4.035012233	7.950318212	8.13424816	12.45463034	7.456035873	6.110135119	6.151186106	7.226595062	4.634554344	3.654261996	0.704467965	6.657415895	0.648072619	0.562819119	2.781438949	0.708901848	5.385325607	2.978527579	1.13599898	1.976663662	0.202984609	0	1.09425657
CR31781	5.393064083	5.68510662	144.2792373	6.702111993	9.300187534	16.63555801	35.32451669	113.8300438	8.907978691	6.651042924	20.15278425	29.98568827	10.83087321	9.186064993	10.5387997	69.28612379	15.13943494	69.35256208	62.92706739	9.646547262	9.473393579	15.06950467	11.9770244	19.63670884	13.56835846	21.8801607	22.59179198	19.30144808	16.84269685	30.87737982	87.77419593	132.4310409	159.8309175	3.903563269	7.444186752	5.3770507	4.94689553	9.791293184	1.042082047	1.113431811	11.37826436	5.012966854	2.287050669	0	0.948116583	1.172508848	12.35140499	9.347851175	0.361103971
CR40469	24.40360607	18.18172188	194.2799067	59.81713538	7.464621801	16.61087449	24.6701758	383.2145362	4.833000961	3.706756443	17.78288996	12.70005061	32.63590683	6.52627847	54.56332284	35.15716888	5.019357094	33.76887988	17.36320871	25.38477845	18.81021152	56.00773544	214.7160574	149.6123228	320.1852117	162.3837637	253.5080635	152.2870885	221.3329936	253.5278521	86.64626573	104.1839429	257.6783804	24.22506562	49.92117682	28.50686071	110.5281736	273.604707	30.32718595	7.178426418	128.4884275	240.9801988	57.1338172	55.38290922	70.29942482	16.03312806	146.3963493	2780.897362	162.8797669
CR43148	0.339585529	0.063882006	2.894990514	1.008453211	0.871068341	0.501257381	0.263129941	0.778558233	0.050325352	0	0.364133739	0.178712084	0.645042396	0.111093737	0.481559469	0.557051461	0.182800928	1.332536651	0.390923317	0.646467946	0.278390687	1.800549261	1.822769328	1.471745125	1.47301248	2.10523789	1.017435374	2.514708488	2.141317783	1.934851583	0.624571425	0.736221027	0.732047962	0.600311439	0.51602021	0.257951756	0.039222613	0.636694657	0.086943633	0.007822575	0.668151097	1.155355644	0.637142866	0.431209154	0.136713306	0.729820804	1.656137659	0	0.948590909
CR43641	0.117846053	0.088099838	4.809905079	0.328894534	0.312661882	1.322358695	2.427225762	6.088324559	1.070718557	1.385501651	0.572424252	0.597957583	0.438052089	0	0.277519554	1.681305526	0.469957008	0.961907102	1.200925792	0.892578026	0	2.922899907	1.850338672	1.127388531	1.134035689	3.681300089	2.280999341	2.971770163	3.060857698	4.609287271	2.790888732	3.067643081	1.847116936	2.478981329	1.305664741	0.523430763	1.724857994	8.437574508	0.080808404	0.071706044	0.332048933	0.258943156	1.055202019	2.664850776	0.328072616	0	6.195383137	34.62743156	6.204591374
CR44095	0	0	0.068800685	3.194660706	1.54293983	0.838544742	1.15232002	1.270930591	0.776573675	0.379834012	0.529682215	1.576940532	1.618508279	0.282077292	1.264736931	2.134918981	0.978517622	1.703311023	1.020413947	1.600193124	0.574522509	0.255628931	0.503946197	0.300843555	0.660457346	0.865530744	0.454394007	0.481361327	0.56266819	0.584474591	0.621756793	0.41532482	0.963486642	1.062569601	0.974007873	1.639640368	0.277614945	0.612402396	2.468514698	0.732480525	0.316961374	0.500023587	10.70337182	0.579420694	1.582288555	0	0.160478131	0.070007326	0.539661641
CRMP	5.787374453	4.252929101	3.889107972	5.82537949	6.830320583	3.815635699	3.084407681	2.643328135	9.919717566	8.449445507	3.121039264	3.959372075	4.19243233	5.614578548	3.931338942	3.221100245	5.440408262	3.840243159	5.229615755	5.237664464	6.981414485	7.631064666	13.45568878	15.53768585	10.04140535	13.11931188	19.89277069	16.94272297	19.75981554	23.77362011	5.068610624	6.756622258	7.706045965	1.681136797	1.63779566	1.089029899	1.02308043	1.939455712	1.174624785	1.027971504	7.673831321	22.57060401	0.672068414	2.680462548	6.11357774	5.212693266	70.28460427	15.66322825	28.05136481
Ca-P60A	242.9779347	218.0170746	237.307776	157.8625867	253.7439388	327.2903857	231.296787	125.7833102	202.1963827	132.9771329	375.2675157	426.248151	275.8507303	330.3912496	382.036144	171.5145221	155.9378627	455.937043	562.3480129	240.3106339	417.9295429	619.4839325	253.9418894	157.2480005	821.3920571	347.2345656	185.8698943	889.888029	335.7255875	181.1445865	1748.917728	976.8304198	259.0646205	64.67621835	68.84140866	70.19269809	36.07001315	100.515417	137.5582768	109.1672559	185.1955006	65.64711431	98.41853347	26.08055336	92.69195122	6.837443926	94.39525677	39.07064733	47.03042503
Ca-alpha1D	1.51398315	1.657063717	8.172643908	0.512549059	0.889357254	2.549457361	4.73988786	3.857228729	3.557862108	2.683468496	2.772413228	4.292850893	1.119137098	1.250078845	1.049640969	2.672264806	3.636555999	4.229981536	7.459048665	0.903655952	0.968013867	16.32307573	15.02678004	10.23559127	14.55329991	16.11949377	10.68249068	22.92702601	23.9241325	20.48942259	12.96580036	7.751038839	4.394993302	0.559342633	0.917943384	0.607491884	2.043142068	7.712718677	0.087072885	0.125539565	2.441533154	5.130229474	0.282998759	0.0686957	3.088125056	0.002199507	22.96611803	1.928759544	0.56663861
Cad74A	1.043568518	0.544304612	0.318711108	2.183146232	1.895392208	1.403753586	0.279624629	0.296612667	1.427116387	0.868859032	4.503695813	4.192607428	2.050800559	1.662694152	1.887697467	0.174578891	0.401893565	0.877662474	0.542157352	1.352603137	1.211068002	0.536003732	0.642662823	0.444350079	0.530799295	0.556713698	0.764634983	1.042665709	0.710166127	0.742286097	0.595586323	0.748572785	0.48889708	0.311543794	0.239943375	0.149977005	0.600385006	3.652586563	3.366460349	3.526197289	9.37946067	2.296549712	0.237006943	0.015362262	12.04299625	0.022096382	1.823181926	5.198580381	1.353568608
Cad88C	0.008893408	0.070037387	0.00254326	0.119149272	0.017754225	0.011117544	0.062388548	0.008745894	0.111365164	0.091287888	0.412300728	0.319226442	0.035257896	0.052196614	0.065529635	0.086573925	0.068029349	0.064423066	0.095532186	0	0	0.021225759	0.045315154	0.068422896	0.078424597	0.127701649	0.04359607	0.021954536	0.144207099	0.180616898	0.059980587	0.056930617	0.120296988	0.021410188	0.065040732	0.005478879	0.029653159	0.073623604	0.461488458	0.510583398	0.424234301	0.22152839	0.05880009	0.182929306	0.259282188	0.011318749	0.573290783	0.679151157	0.277491957
Cad96Cb	0.642441783	0.013077546	0.010037733	0.156694034	0.054500709	0	0.809461783	0	0.377250542	0.097209376	0.050311595	0.103540952	0.053683497	0.066699201	0.033945481	0.058572618	0.130716181	0	0.098900245	0	0.11037643	0.057963144	0.054724105	0.066827745	0.055157204	0.092585794	0.320400657	0.054680917	0.079081554	0.133907803	0	0.014790084	0	0.010562711	0.024755235	0	0.010892353	0.048681475	0	0	0.497699981	0.67478434	0.050593523	0.022705798	0.532852754	0	2.756289287	4.101945607	0.135293282
Camta	1.916187844	2.10638213	5.983032249	0.821043655	0.901966735	3.67624444	7.392063229	6.505450898	3.116767406	3.1799492	3.478549598	7.495266745	1.016553036	0.859091551	0.784295615	6.606967863	3.307459224	5.614073465	7.907051377	0.832484643	0.73131471	7.5523328	6.376204287	4.467639656	6.63119525	6.488358726	4.471399781	12.71541982	10.57384913	9.15496067	2.443070085	2.294513447	1.995962855	1.899399252	3.055633519	2.534060644	3.68691573	4.122178588	9.980258815	9.186121907	3.56717613	5.099231697	1.938629789	0.983046946	8.249450443	0.184421293	9.214995375	1.052021452	2.846959911
Caps	0.431054848	0.686874524	3.880132543	1.970510265	0.529868192	1.434605435	2.659168188	3.118189186	1.543251185	1.437354342	1.362543613	1.805598756	0.788374912	0.656836216	0.760295474	1.76791028	1.343649543	3.130859025	2.953632347	0.95710005	0.370847802	12.5803514	13.64709213	8.061983401	15.18698322	12.02235916	8.221853587	24.08957487	26.27006431	21.66040944	2.136978591	1.947401627	1.420430546	0.479323327	0.547420341	0.54425023	0.335744116	1.764097356	0.099730488	0.110841358	3.408971339	22.13403931	0.842052984	0.276750329	2.192988495	0.248356962	50.87015079	5.451611555	1.664138569
Cbp53E	1.14138935	1.233293794	18.99180982	4.587789136	3.983042856	6.142651215	9.67686111	9.325254275	4.489124047	4.23591631	5.765504826	7.575944028	7.040900068	4.46304763	4.72453996	7.488483553	3.687944138	15.71939481	12.49395476	6.235279173	4.2126779	75.3042691	48.79884539	29.10785465	107.9018542	66.43079438	36.418952	155.0849143	94.65988309	71.99843021	18.468746	11.95885915	7.522660534	3.701615871	5.384506249	2.60096837	0.194849565	1.417716493	0.019708193	0.04359588	3.024497688	14.02287224	6.925211456	0	1.988698178	0.08763632	74.18563845	1.073097386	0.237334772
CdGAPr	2.244519015	2.594858969	8.240272342	2.472972401	3.048035757	10.79568135	20.14299199	9.885071919	6.729070736	5.818669988	7.604830892	22.49704827	3.262972023	3.36558249	3.615078813	16.7980723	5.728030719	15.11975056	20.39872021	2.288743162	2.394944368	7.963236906	5.810197721	7.459351677	6.807829793	7.717843214	9.168943111	10.94922262	8.468325138	11.06148726	5.307682213	5.304354982	6.226349605	1.651955866	2.529658261	2.330777514	40.25295578	11.61652252	26.24072845	21.56155713	12.88842297	28.66389602	2.334336236	1.631870717	23.77959153	0.421765475	17.71488983	14.92022479	7.933098665
Cdk4	6.811761288	2.756087905	2.272785172	7.202837641	5.79113943	8.305376694	15.37582742	6.292930343	4.793410751	4.414671839	11.10998971	18.81573691	4.864613557	5.862220758	5.85284551	12.74866657	4.980846191	16.03522176	15.80994503	4.860788161	7.35882603	4.043157277	3.046696967	2.100051583	5.116334093	5.178126236	3.472467882	5.708147631	3.53412095	3.887409287	2.493886118	2.124095702	2.26135369	2.386811038	2.567300738	2.234270474	0.301146264	0.599060265	32.08405875	23.06596998	12.16642186	6.254965876	2.160585546	0.669340691	12.45406227	1.367091473	1.930356275	3.014017788	2.544158265
CecA1	0.214315996	0	187.7659279	12.66264118	57.76460871	9.986457561	7.23162659	156.297197	17.43899815	9.435321318	35.13941767	13.81366678	187.4078772	148.7753769	118.1607459	4.203295479	14.85079419	25.95894284	34.9087853	259.5178263	81.46567108	28.76046275	33.5263534	157.0913738	14.76754189	63.02196789	128.2229291	10.66267258	24.86834689	180.4785488	168.5683754	158.0555466	589.059026	26.56314609	17.65321014	35.62534931	58.96357026	539.3387486	2.300051928	0.069012509	8.473406327	2.041847416	23.42946019	44.15462456	6.715112405	2.468838169	6.817913431	220.0427022	20.15016321
CecB	0	0	3.56114714	1.522501697	2.053892598	0.776694392	0	1.417188657	1.495195017	0.469354326	3.448970115	0.271802107	25.61565964	18.21489798	4.803441578	0	0.640432551	0.489794228	0	13.2648043	3.754782925	0.41377327	2.26537748	7.446494045	0.288124188	1.963057001	9.522525115	0	1.286028572	10.67606339	6.717645308	4.486603227	16.89564391	0.572587396	0.206283247	0.965651675	0.069298853	0.054974459	0.183080029	0	1.380970149	0	0	5.727323783	0.26988576	0	3.606755157	60.52925515	2.405920414
Cenp-C	1.850586731	0.533937423	11.06930894	3.167423447	1.278789367	17.65706097	56.04421426	38.86493692	8.583331135	6.045932518	13.87125406	34.08041253	2.070251279	2.211705903	2.650324877	46.49657533	14.35902618	28.94320117	21.02198294	1.198664294	0.564245858	1.33970293	1.139562305	1.290425486	1.042323716	1.517624962	1.057811568	0.996737681	1.524340284	2.656919214	2.003958203	4.355731827	3.00043143	0.744071183	2.74795198	1.339835866	3.701256233	4.004414286	88.56822044	85.38061933	9.558446197	20.16964056	1.902615704	0.699387414	20.79420181	0.181950276	3.365068439	4.782111199	4.766500724
Cg25C	154.7602876	104.6188965	57.77209597	16.25648425	91.29354606	97.31047758	15.24488141	26.38895313	32.60939838	26.87122895	80.05144074	19.55723562	83.41427374	103.2276212	54.7450051	25.05645084	41.52685572	45.63346161	53.24242861	68.90786914	208.3441677	152.3197355	80.41690573	50.5341836	142.7556985	78.46868611	38.94685042	130.2790514	81.71931897	47.12695092	168.2903475	99.6677564	69.58211217	23.53256109	10.67913142	4.392939638	5.067369087	7.459398413	20.90302421	20.21295933	21.76026452	12.7047269	2.201504915	277.0290445	8.959341593	1.08487447	49.07891312	86.46560936	36.53614958
CheA75a	0	0	12.40955322	0	0	0.816014458	3.8740344	4.124075606	0.546713059	1.13743805	3.55635361	4.937813516	0	0.118273659	0	7.797848562	1.473705968	7.592453666	11.64959043	0	0	1.787585814	1.149686626	0.727461062	2.325246547	2.479594999	2.197999348	2.880415919	1.811038997	1.067305355	16.44989941	26.34088473	22.05074849	0.221344148	0.128195503	0.091129891	0.082371959	0.08556663	0	0.01326602	0.189841767	0	0	0	0.053599113	0	0.087547645	0	0
CheA84a	0	0	1.022717495	0	0	0	0.040846802	0	0.253457518	0	0.59389785	0.319821905	0	0	0	0.633312077	0.004980099	1.232004289	0.473115998	0	0	0	0.128096669	0	0.104916634	0.207268266	0.462995953	0.332262824	0.368983134	0	2.952903215	2.664229009	3.83263984	0.164714437	0	0	0	0	0.055423017	0	0.063636042	0	0	0	0	0	0	0	0
CheA87a	0	0	3.692267932	0	0.017898071	1.337123605	1.712257194	4.418231181	0.569555302	0.635013845	1.156668183	1.168142775	0.077787898	0.102719223	0	7.563294499	0.695210232	6.070638974	6.407311308	0	0	0.959220119	1.087194858	1.042478233	1.456264699	5.513144023	1.273941136	1.195916899	2.70975676	6.095494103	7.476117399	13.80172644	10.54063413	0.203140279	0.087549931	0.050361339	0	0	0.027754862	0	0.062413892	0	0.145046144	0	0.01948394	0	0.159439606	3.549357178	0
CheB38c	0	0	0.22375473	0	0	0.018060277	0.281258965	0.538121955	0.107287265	0.461700858	0.586265923	0.583910969	0	0	0	1.747596925	0.311419124	1.134754736	0.586702359	0	0	0.010968862	0.131013144	0.215746965	0.349701213	0.474087528	0.262333823	2.063987785	0.299735022	0.102840163	2.749473223	4.860527453	4.169608776	0	0.20739026	0.024258976	1.378289144	0	0.05313063	0	0	0	0	0	0.015971943	0	0	0	0
Cht3	5.272044105	4.963602488	1.931961389	48.02181389	14.39546504	10.64638208	5.159011453	2.797669449	4.728759926	4.738726948	7.139255409	2.631844263	9.527228066	10.65366909	17.38493586	3.121826193	3.497915948	2.305845798	3.05435886	14.78829474	4.873795409	0.273732839	0.058053565	0.37198028	0.148546733	0.039555124	0.171091463	0.328231455	0.170308691	0.411756154	0.534565569	1.059596492	1.14928077	0.215669719	0.575341751	0.388338228	0.353082634	0.717940864	15.37065182	13.93577938	186.7091395	19.39919143	7.140409963	1.387157514	74.075246	1.443346957	14.72585303	14.69242291	18.29748911
Cht4	12.99264408	4.965432523	13.03610281	7.012295507	33.1947417	16.1851256	15.19498619	4.038592463	3.799590999	2.568321639	11.61974427	14.55402914	20.10089043	16.17045452	122.5443962	3.571990749	2.536925674	1.486822391	13.14623655	78.6345052	61.53905064	0.035678063	0.04623917	0.040519426	0.289467662	0.013204956	0.036977051	0.035789583	0.022090824	0	1.842955318	0.543143786	3.338289285	92.33150735	21.02377241	62.77989803	0.413189023	0.591369489	0	0.032213583	0.093299273	0	48.16808271	0.617338445	37.2944022	0.287682145	0.461070451	6.141626446	3.099484471
Cht8	0	0	7.617138125	0.055593906	0.903850419	2.68463298	4.091092952	3.889210099	2.77044159	4.457834874	2.960995029	7.17333231	0.399636138	0.351910345	0.046414822	8.447462326	3.175146581	11.76214058	17.90707553	0.357936663	0	0.024922492	0.617562943	0.471608569	0.105700031	0.020585768	0.231911934	0.024717189	0.195851718	0.277741275	5.26406208	5.694705753	7.540035958	40.40545451	32.21746214	35.85523278	0.012485049	0.276124187	0.047033586	0.020236347	0.148630691	0.19294283	0.098076977	0	0.087281067	0.123833849	3.983163975	24.23746204	0
Cirl	44.43907444	69.73258457	55.03191303	15.95238294	11.35235084	23.74681773	34.07239185	31.53950072	194.1433732	159.1958849	20.2944942	32.35326969	7.746422336	11.89046816	9.585928087	32.08330022	130.5574405	38.97481197	39.59770767	7.503602883	8.897585032	65.45402498	54.95811467	41.70329237	65.46641654	64.7120814	39.40476765	85.737423	83.7896908	76.09100085	26.19450151	23.91092608	22.67582175	11.4378113	20.34394299	26.70984955	6.541886993	41.73458496	30.11767377	51.58531158	140.2772524	262.2550915	19.20503155	38.79038951	113.3480415	19.14696649	263.8973882	144.7667746	60.08460216
Clect27	441.5588177	802.7641311	182.5266472	493.9697305	654.2781729	412.6622613	49.83053668	94.56976046	111.4367629	83.7913957	319.7041854	20.50117877	635.8369154	595.0655463	276.6327309	32.82975758	141.7764286	71.965956	41.99386026	488.8243973	534.3112769	237.1051661	70.32150648	57.78431575	365.8397909	151.8568945	54.098333	413.1265998	276.9750822	221.5682222	338.2466955	172.4129102	105.6443269	32.3919328	25.35289806	14.04277279	1.134771378	4.630750616	0.1527433	0.294440016	1074.161946	63.39905538	15.99064159	2.376305718	8.658577665	5.251129427	45.10487888	73.77687274	1.884850019
Cp16	1.311568762	4.981107069	4.344155046	0.028926507	0.022012955	1.222445309	0	2.522774412	80.08189715	81.54290061	184.7535867	103.0730004	0	0.015895095	0	0.04653192	41.76096767	0.247309247	0.444341926	0.102321573	0	0	0	0	0	0.145474814	0	0.035126557	0	0	12.66262085	51.53486777	21.20875992	9.219227294	6.203532985	15.18247619	0	0	52.93810994	84.14813465	0.235314265	0	0	0	0.0360166	0	0.019609581	0	0
Cp18	0.545693277	0.826550625	17.17546286	0.257928017	0.390465089	0.669496594	0.750704541	8.449810752	174.6017281	130.4831539	388.497487	257.4739775	0.231871194	0.025601988	0.258308277	0.443217582	81.14378521	1.426353797	1.385505705	0.741169728	0.075790295	0.124791706	0.822958658	1.167474134	0.116223666	1.48743154	0.152061912	0.70994674	0.808348747	0.883183399	16.78622139	63.34085202	15.01602795	10.76228926	6.357287434	11.18448348	0.276007469	0.474152645	98.30862737	158.8128208	0.77317091	0.40524626	0.20419516	0.052378148	0.706942713	0	0.403997123	0	0
[truncated: 570 more rows]
[truncated: 36 more columns]
